# Supplementary material
Source: PubMed Central journal article supplement (PMC7580270)
Supplement: NIHMS1638615-supplement-Supporting_Information.pdf [file NIHMS1638615-supplement-Supporting_Information.pdf]

# A Convergent Catalytic Asymmetric Synthesis of Esters of Chiral Dialkyl Carbinols

Ze-Peng Yang and Gregory C. Fu\*

Division of Chemistry and Chemical Engineering, California Institute of Technology,  
Pasadena, California 91125, United States

## Supporting Information

### Table of Contents

|       |                                       |      |
|-------|---------------------------------------|------|
| I.    | General Information                   | S-2  |
| II.   | Preparation of Electrophiles          | S-3  |
| III.  | Catalytic Enantioconvergent Couplings | S-10 |
| IV.   | Effect of Reaction Parameters         | S-37 |
| V.    | Functional-Group Compatibility        | S-39 |
| VI.   | Four-Component Reactions              | S-40 |
| VII.  | Applications                          | S-44 |
| VIII. | Assignment of Absolute Configuration  | S-47 |
| IX.   | References                            | S-49 |
| X.    | NMR Spectra; ee Analysis              | S-50 |

## I. General Information

Unless otherwise noted, reagents received from commercial suppliers were used as received. Ligands (*S,S*)-L\* and (*R,R*)-L\* were prepared according to a literature procedure, and all analytical data matched that report.<sup>1</sup> K<sub>3</sub>PO<sub>4</sub>·H<sub>2</sub>O was purchased from Sigma-Aldrich; it is important that the mono-hydrate (1.0 equiv of water) is used. Anhydrous MTBE (methyl *tert*-butyl ether) and *i*-Pr<sub>2</sub>O were purchased from Sigma-Aldrich and stored under nitrogen; other solvents were purified by passage through activated aluminum oxide in a solvent-purification system. Unless otherwise noted, all reactions were performed under an atmosphere of dry nitrogen. Flash column chromatography was performed using silica gel (SiliaFlash® P60, particle size 40-63 μm, Silicycle).

NMR spectra were collected on a Bruker 400 MHz or a Varian 500 MHz spectrometer at ambient temperature; chemical shifts (δ) are reported in ppm downfield from tetramethylsilane, using the solvent resonance as the internal standard. HPLC analyses were carried out on an Agilent 1100 series system with Daicel CHIRALPAK® or Daicel CHIRALCEL® columns (4.6 × 250 mm, particle size 5 μm). SFC analyses were carried out on an Agilent 1260 Infinity II system with Daicel CHIRALPAK® or Daicel CHIRALCEL® columns (4.6 × 250 mm, particle size 5 μm). FT-IR measurements were carried out on a Thermo Scientific Nicolet iS5 FT-IR spectrometer equipped with an iD5 ATR accessory. HR-MS data were acquired on a Waters LCT Premier XE TOF MS in electrospray ionization (ESI+) mode. GC-MS data were obtained on an Agilent 7890A GC-MS system with an Agilent 5975C detector. Optical-rotation data were obtained with a Jasco P-2000 polarimeter at 589 nm, using a 100 mm pathlength cell in the solvent and at the concentration indicated. GC analyses were obtained on an Agilent 6890N GC.

## II. Preparation of Electrophiles

The yields have not been optimized.

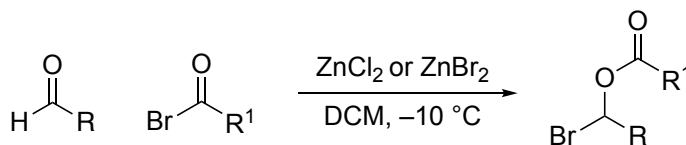

**General Procedure 1 (GP-1): Preparation of the electrophile.**<sup>2</sup> An oven-dried 100 mL round-bottom flask was charged with a magnetic stir bar and either ZnCl<sub>2</sub> or ZnBr<sub>2</sub> (0.050 equiv), and then it was sealed with a rubber septum cap. The flask was placed under a nitrogen atmosphere by evacuating and backfilling the flask (three cycles), followed by the addition of DCM and the acyl bromide (1.2 equiv). The resulting solution was cooled to -10 °C, and the mixture was stirred for 10 min. At this temperature, the aldehyde (1.0 equiv) was added via syringe pump over 30 min, and the resulting mixture was stirred for 2 h. Then, the reaction mixture was filtered through a short column of neutral aluminium oxide, with a DCM washing. The filtrate was concentrated under reduced pressure. The residue was either purified by vacuum distillation to afford the pure product, or used directly after the determination of its purity by <sup>1</sup>H NMR (CH<sub>2</sub>Br<sub>2</sub> as the internal standard).

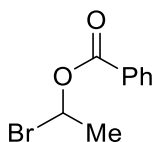

**1-Bromoethyl benzoate.** The title compound was synthesized according to GP-1 from ZnCl<sub>2</sub> (544 mg, 4.0 mmol), BzBr (11.3 mL, 96.0 mmol), acetaldehyde (4.5 mL, 80 mmol), and DCM (10 mL). The product was purified by vacuum distillation (b.p. = 75–79 °C, 1.2 Torr). 9.6 g (42.1 mmol, 53% yield). Colorless oil.

<sup>1</sup>H NMR (400 MHz, CDCl<sub>3</sub>) δ 8.12 – 8.04 (m, 2H), 7.65 – 7.56 (m, 1H), 7.52 – 7.42 (m, 2H), 6.97 (q, *J* = 5.9 Hz, 1H), 2.14 (d, *J* = 5.9 Hz, 3H).

<sup>13</sup>C NMR (101 MHz, CDCl<sub>3</sub>) δ 164.1, 134.0, 130.2, 128.9, 128.7, 72.4, 27.0.

FT-IR (film): 2983, 1732, 1603, 1453, 1265, 1064, 898, 707 cm<sup>-1</sup>.

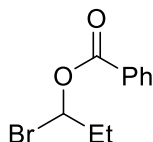

**1-Bromopropyl benzoate.** The title compound was synthesized according to GP-1 from ZnCl<sub>2</sub> (870 mg, 6.4 mmol), BzBr (18.0 mL, 154 mmol), propionaldehyde (9.2 mL, 128 mmol), and DCM (20 mL). The product was purified by vacuum distillation (b.p. = 88–90 °C, 0.5 Torr). 22.4 g (92.6 mmol, 72% yield). Colorless oil.

$^1\text{H}$  NMR (500 MHz,  $\text{CDCl}_3$ )  $\delta$  8.10 – 8.05 (m, 2H), 7.65 – 7.58 (m, 1H), 7.50 – 7.43 (m, 2H), 6.85 (t,  $J = 5.7$  Hz, 1H), 2.36 – 2.23 (m, 2H), 1.15 (t,  $J = 7.3$  Hz, 3H).

$^{13}\text{C}$  NMR (126 MHz,  $\text{CDCl}_3$ )  $\delta$  164.2, 134.0, 130.1, 129.0, 128.7, 78.3, 32.9, 10.4.

FT-IR (film): 2980, 2941, 1732, 1602, 1453, 1261, 1066, 961, 908, 716  $\text{cm}^{-1}$ .

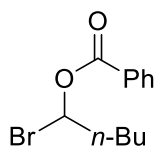

**1-Bromopentyl benzoate.** The title compound was synthesized according to **GP-1** from  $\text{ZnCl}_2$  (544 mg, 4.0 mmol),  $\text{BzBr}$  (11.3 mL, 96.0 mmol), valeraldehyde (8.5 mL, 80 mmol), and DCM (10 mL). The product was purified by vacuum distillation (b.p. = 103–108  $^\circ\text{C}$ , 0.7 Torr). 8.4 g (31.1 mmol, 39% yield). Yellow oil.

$^1\text{H}$  NMR (400 MHz,  $\text{CDCl}_3$ )  $\delta$  8.10 – 8.04 (m, 2H), 7.66 – 7.57 (m, 1H), 7.52 – 7.44 (m, 2H), 6.89 (t,  $J = 5.9$  Hz, 1H), 2.37 – 2.21 (m, 2H), 1.61 – 1.49 (m, 2H), 1.48 – 1.35 (m, 2H), 0.95 (t,  $J = 7.3$  Hz, 3H).

$^{13}\text{C}$  NMR (101 MHz,  $\text{CDCl}_3$ )  $\delta$  164.3, 134.0, 130.2, 129.0, 128.7, 76.8, 39.4, 28.1, 22.1, 14.0.

FT-IR (film): 2959, 1746, 1602, 1453, 1242, 1067, 989, 708  $\text{cm}^{-1}$ .

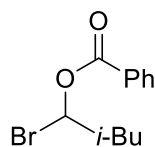

**1-Bromo-3-methylbutyl benzoate.** The title compound was synthesized according to **GP-1** from  $\text{ZnBr}_2$  (888 mg, 4.0 mmol),  $\text{BzBr}$  (11.3 mL, 96.0 mmol), isovaleraldehyde (8.6 mL, 80 mmol), and DCM (10 mL). The product was purified by vacuum distillation (b.p. = 95–98  $^\circ\text{C}$ , 0.7 Torr). 14.3 g (53.0 mmol, 66% yield). Colorless oil.

$^1\text{H}$  NMR (400 MHz,  $\text{CDCl}_3$ )  $\delta$  8.12 – 8.04 (m, 2H), 7.65 – 7.57 (m, 1H), 7.53 – 7.42 (m, 2H), 6.95 (dd,  $J = 7.6, 5.6$  Hz, 1H), 2.28 (ddd,  $J = 14.2, 7.6, 6.6$  Hz, 1H), 2.16 (ddd,  $J = 14.3, 7.3, 5.6$  Hz, 1H), 1.99 – 1.86 (m, 1H), 0.99 (d,  $J = 6.4$  Hz, 3H), 0.98 (d,  $J = 6.8$  Hz, 3H).

$^{13}\text{C}$  NMR (101 MHz,  $\text{CDCl}_3$ )  $\delta$  164.3, 134.0, 130.2, 129.0, 128.7, 76.0, 48.4, 26.1, 22.4, 22.1.

FT-IR (film): 2962, 1735, 1602, 1452, 1260, 1067, 987, 716  $\text{cm}^{-1}$ .

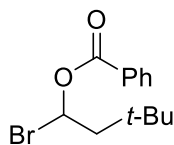

**1-Bromo-3,3-dimethylbutyl benzoate.** The title compound was synthesized according to **GP-1** from  $\text{ZnCl}_2$  (340 mg, 2.5 mmol),  $\text{BzBr}$  (7.0 mL, 60 mmol), 3,3-dimethylbutyraldehyde (5.0

g, 50 mmol), and DCM (8 mL). The product was purified by vacuum distillation (b.p. = 102–103 °C, 0.9 Torr). 9.9 g (35 mmol, 70% yield). Colorless oil.

$^1\text{H}$  NMR (400 MHz,  $\text{CDCl}_3$ )  $\delta$  8.13 – 8.01 (m, 2H), 7.67 – 7.57 (m, 1H), 7.55 – 7.42 (m, 2H), 7.07 (dd,  $J$  = 10.1, 2.2 Hz, 1H), 2.54 (dd,  $J$  = 14.8, 10.1 Hz, 1H), 2.25 (dd,  $J$  = 14.8, 2.3 Hz, 1H), 0.98 (s, 9H).

$^{13}\text{C}$  NMR (101 MHz,  $\text{CDCl}_3$ )  $\delta$  164.1, 134.1, 130.2, 128.9, 128.8, 74.9, 53.4, 32.1, 29.8.

FT-IR (film): 2956, 1738, 1602, 1454, 1246, 1063, 975, 714  $\text{cm}^{-1}$ .

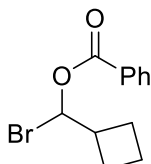

**Bromo(cyclobutyl)methyl benzoate.** The title compound was synthesized according to GP-1 from  $\text{ZnBr}_2$  (400 mg, 1.8 mmol), BzBr (5.0 mL, 43 mmol), cyclobutanecarbaldehyde (3.0 g, 36 mmol), and DCM (10 mL). The product was purified by vacuum distillation (b.p. = 103–104 °C, 0.6 Torr). 7.7 g (29 mmol, 80% yield). Yellow solid.

$^1\text{H}$  NMR (400 MHz,  $\text{CDCl}_3$ )  $\delta$  8.13 – 8.03 (m, 2H), 7.67 – 7.58 (m, 1H), 7.53 – 7.44 (m, 2H), 6.83 (d,  $J$  = 7.2 Hz, 1H), 3.19 – 3.07 (m, 1H), 2.17 (m, 2H), 2.10 – 1.81 (m, 4H).

$^{13}\text{C}$  NMR (101 MHz,  $\text{CDCl}_3$ )  $\delta$  164.5, 134.0, 130.2, 129.0, 128.7, 80.2, 42.6, 25.3, 25.1, 16.8.

FT-IR (film): 2985, 1738, 1601, 1452, 1263, 1064, 994, 711  $\text{cm}^{-1}$ .

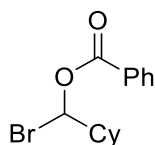

**Bromo(cyclohexyl)methyl benzoate.** The title compound was synthesized according to GP-1 from  $\text{ZnBr}_2$  (555 mg, 2.5 mmol), BzBr (7.0 mL, 60 mmol), cyclohexanecarbaldehyde (6.0 mL, 50 mmol), and DCM (5 mL). The product was used without further purification (98 wt.%). 14.3 g (47.3 mmol, 95% yield). Yellow solid.

$^1\text{H}$  NMR (500 MHz,  $\text{CDCl}_3$ )  $\delta$  8.10 – 8.04 (m, 2H), 7.65 – 7.58 (m, 1H), 7.51 – 7.44 (m, 2H), 6.77 (d,  $J$  = 4.7 Hz, 1H), 2.06 – 1.95 (m, 3H), 1.88 – 1.80 (m, 2H), 1.76 – 1.68 (m, 1H), 1.39 – 1.15 (m, 5H).

$^{13}\text{C}$  NMR (126 MHz,  $\text{CDCl}_3$ )  $\delta$  164.2, 134.0, 130.1, 129.1, 128.7, 82.3, 45.6, 29.3, 28.6, 26.2, 25.73, 25.71.

FT-IR (film): 2932, 1732, 1602, 1452, 1258, 1064, 962, 708  $\text{cm}^{-1}$ .

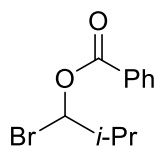

**1-Bromo-2-methylpropyl benzoate.** The title compound was synthesized according to **GP-1** from ZnCl<sub>2</sub> (544 mg, 4.0 mmol), BzBr (11.3 mL, 96.0 mmol), isobutyraldehyde (7.3 mL, 80 mmol), and DCM (10 mL). The product was purified by vacuum distillation (b.p. = 88–94 °C, 0.5 Torr). 11.9 g (46.5 mmol, 58% yield). Colorless oil.

<sup>1</sup>H NMR (400 MHz, CDCl<sub>3</sub>) δ 8.12 – 8.02 (m, 2H), 7.66 – 7.58 (m, 1H), 7.53 – 7.43 (m, 2H), 6.81 (d, *J* = 4.2 Hz, 1H), 2.35 – 2.21 (m, 1H), 1.18 (t, *J* = 6.4 Hz, 3H), 1.16 (t, *J* = 6.4 Hz, 3H).

<sup>13</sup>C NMR (101 MHz, CDCl<sub>3</sub>) δ 164.2, 134.0, 130.1, 129.1, 128.7, 83.3, 36.2, 18.5, 18.4.

FT-IR (film): 2973, 1746, 1602, 1456, 1255, 1064, 802, 680 cm<sup>-1</sup>.

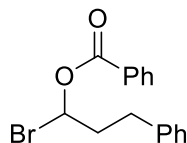

**1-Bromo-3-phenylpropyl benzoate.** The title compound was synthesized according to **GP-1** from ZnBr<sub>2</sub> (555 mg, 2.5 mmol), BzBr (7.0 mL, 60 mmol), 3-phenylpropionaldehyde (6.6 mL, 50 mmol), and DCM (10 mL). The product was used without further purification (95 wt.%). 13.6 g (40.6 mmol, 81% yield). Yellow solid.

<sup>1</sup>H NMR (400 MHz, CDCl<sub>3</sub>) δ 8.08 – 8.01 (m, 2H), 7.67 – 7.59 (m, 1H), 7.52 – 7.44 (m, 2H), 7.37 – 7.28 (m, 2H), 7.26 – 7.19 (m, 3H), 6.87 (t, *J* = 5.8 Hz, 1H), 2.92 (t, *J* = 7.2 Hz, 2H), 2.70 – 2.55 (m, 2H).

<sup>13</sup>C NMR (101 MHz, CDCl<sub>3</sub>) δ 164.1, 139.9, 134.1, 130.2, 128.9, 128.8, 128.7, 128.6, 126.5, 76.3, 41.0, 32.2.

FT-IR (film): 3027, 1738, 1602, 1453, 1245, 1065, 919, 711 cm<sup>-1</sup>.

HRMS (ESI-MS) *m/z* [M+NH<sub>4</sub>]<sup>+</sup> calcd for C<sub>16</sub>H<sub>19</sub>BrNO<sub>2</sub>: 336.0594, found: 336.0604.

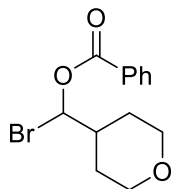

**Bromo(tetrahydro-2H-pyran-4-yl)methyl benzoate.** The title compound was synthesized according to **GP-1** from ZnBr<sub>2</sub> (235 mg, 1.1 mmol), BzBr (2.5 mL, 21 mmol), tetrahydro-2H-pyran-4-carbaldehyde (2.0 g, 18 mmol), and DCM (5 mL). The product was used without further purification (95 wt.%). 3.5 g (11.2 mmol, 64% yield). Yellow oil.

<sup>1</sup>H NMR (400 MHz, CDCl<sub>3</sub>) δ 8.12 – 8.03 (m, 2H), 7.66 – 7.58 (m, 1H), 7.53 – 7.43 (m, 2H), 6.77 (d, *J* = 5.4 Hz, 1H), 4.12 – 4.01 (m, 2H), 3.49 – 3.37 (m, 2H), 2.36 – 2.23 (m, 1H), 1.98 – 1.80 (m, 2H), 1.73 – 1.54 (m, 2H).

$^{13}\text{C}$  NMR (101 MHz,  $\text{CDCl}_3$ )  $\delta$  164.1, 134.2, 130.2, 130.1, 128.8, 80.5, 67.42, 67.39\*, 43.3, 29.5, 28.7.

FT-IR (film): 2951, 1732, 1602, 1451, 1258, 1064, 954, 711  $\text{cm}^{-1}$ .

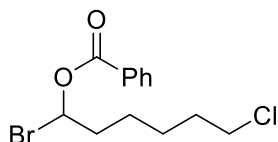

**1-Bromo-6-chlorohexyl benzoate.** The title compound was synthesized according to **GP-1** from  $\text{ZnBr}_2$  (350 mg, 1.6 mmol),  $\text{BzBr}$  (4.5 mL, 38 mmol), 6-chlorohexanal (4.25 g, 31.6 mmol), and DCM (5 mL). The product was used without further purification (85 wt.%). 8.9 g (24 mmol, 75% yield). Brown oil.

$^1\text{H}$  NMR (400 MHz,  $\text{CDCl}_3$ )  $\delta$  8.10 – 8.03 (m, 2H), 7.66 – 7.58 (m, 1H), 7.51 – 7.44 (m, 2H), 6.89 (t,  $J = 5.9$  Hz, 1H), 3.55 (t,  $J = 6.6$  Hz, 2H), 2.35 – 2.25 (m, 2H), 1.89 – 1.77 (m, 2H), 1.68 – 1.50 (m, 4H).

$^{13}\text{C}$  NMR (101 MHz,  $\text{CDCl}_3$ )  $\delta$  164.2, 134.1, 130.2, 128.9, 128.7, 76.7, 44.9, 39.4, 32.4, 26.2, 25.3.  
FT-IR (film): 2934, 1739, 1603, 1454, 1267, 1067, 996, 714  $\text{cm}^{-1}$ .

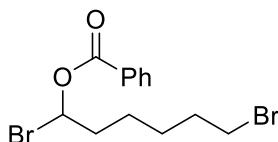

**1,6-Dibromohexyl benzoate.** The title compound was synthesized according to **GP-1** from  $\text{ZnBr}_2$  (390 mg, 1.8 mmol),  $\text{BzBr}$  (4.9 mL, 42 mmol), 6-bromohexanal (6.2 g, 35 mmol), and DCM (5 mL). The product was used without further purification (89 wt.%). 8.9 g (22 mmol, 63% yield). Brown oil.

$^1\text{H}$  NMR (500 MHz,  $\text{CDCl}_3$ )  $\delta$  8.09 – 8.04 (m, 2H), 7.65 – 7.59 (m, 1H), 7.50 – 7.45 (m, 2H), 6.89 (t,  $J = 5.8$  Hz, 1H), 3.43 (t,  $J = 6.7$  Hz, 2H), 2.37 – 2.24 (m, 2H), 1.95 – 1.87 (m, 2H), 1.72 – 1.44 (m, 4H).

$^{13}\text{C}$  NMR (126 MHz,  $\text{CDCl}_3$ )  $\delta$  164.2, 134.1, 130.1, 128.8, 128.7, 76.7, 39.3, 33.6, 32.5, 27.4, 25.2.  
FT-IR (film): 2934, 1738, 1601, 1452, 1260, 1071, 980, 714  $\text{cm}^{-1}$ .

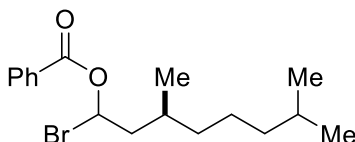

**(3S)-1-Bromo-3,7-dimethyloctyl benzoate.** The title compound was synthesized according to **GP-1** from  $\text{ZnBr}_2$  (120 mg, 0.54 mmol),  $\text{BzBr}$  (1.6 mL, 13 mmol), (*S*)-3,7-dimethyloctanal (1.7 g, 11 mmol), and DCM (5 mL). The product was obtained as a mixture

of two diastereoisomers (~1:1) and used without further purification (62 wt.%). 3.7 g (6.7 mmol, 62% yield). Yellow oil.

$^1\text{H}$  NMR (400 MHz,  $\text{CDCl}_3$ )  $\delta$  8.12 – 8.04 (m, 2H), 7.67 – 7.57 (m, 1H), 7.53 – 7.43 (m, 2H), 7.03 – 6.90 (m, 1H), 2.50 – 2.11 (m, 2H), 1.83 – 1.68 (m, 1H), 1.55 – 1.48 (m, 1H), 1.37 – 1.16 (m, 6H), 0.92 – 0.80 (m, 9H).

$^{13}\text{C}$  NMR (101 MHz,  $\text{CDCl}_3$ )  $\delta$  164.33, 164.26, 134.02, 134.00, 130.18, 130.15, 128.73, 128.71, 76.6, 75.7, 51.2, 47.0, 46.5, 39.2, 37.3, 37.0, 36.8, 30.8, 28.3, 28.1, 24.8, 24.6, 24.5, 22.8, 22.7, 20.1, 19.5, 19.3.

FT-IR (film): 2932, 1738, 1602, 1458, 1256, 1068, 993, 711  $\text{cm}^{-1}$ .

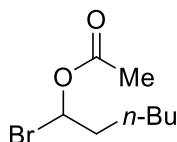

**1-Bromohexyl acetate.** The title compound was synthesized according to **GP-1** from  $\text{ZnCl}_2$  (1.0 g, 7.5 mmol),  $\text{AcBr}$  (13.2 mL, 180 mmol), hexanal (18.4 mL, 150 mmol), and DCM (20 mL). The product was purified by vacuum distillation (b.p. = 58–59  $^\circ\text{C}$ , 1.0 Torr). 17.4 g (78.4 mmol, 52% yield). Colorless oil.

$^1\text{H}$  NMR (400 MHz,  $\text{CDCl}_3$ )  $\delta$  6.59 (t,  $J$  = 6.1 Hz, 1H), 2.17 – 2.04 (m, 2H), 2.10 (s, 3H), 1.51 – 1.39 (m, 2H), 1.39 – 1.23 (m, 4H), 0.95 – 0.81 (m, 3H).

$^{13}\text{C}$  NMR (101 MHz,  $\text{CDCl}_3$ )  $\delta$  168.6, 76.6, 39.4, 31.0, 25.6, 22.5, 21.1, 14.0.

FT-IR (film): 2956, 1767, 1449, 1375, 1211, 1027, 944, 687  $\text{cm}^{-1}$ .

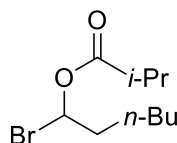

**1-Bromohexyl isobutyrate.** The title compound was synthesized according to **GP-1** from  $\text{ZnBr}_2$  (555 mg, 2.5 mmol), isobutyryl bromide (6.4 mL, 60 mmol), hexanal (6.1 mL, 50 mmol), and DCM (10 mL). The product was purified by vacuum distillation (b.p. = 50–51  $^\circ\text{C}$ , 0.4 Torr). 7.2 g (29 mmol, 58% yield). Colorless oil.

$^1\text{H}$  NMR (400 MHz,  $\text{CDCl}_3$ )  $\delta$  6.62 (t,  $J$  = 6.0 Hz, 1H), 2.69 – 2.49 (m, 1H), 2.22 – 2.06 (m, 2H), 1.51 – 1.41 (m, 2H), 1.36 – 1.28 (m, 4H), 1.19 (d,  $J$  = 6.8 Hz, 3H), 1.18 (d,  $J$  = 6.8 Hz, 3H), 0.93 – 0.86 (m, 3H).

$^{13}\text{C}$  NMR (101 MHz,  $\text{CDCl}_3$ )  $\delta$  174.7, 76.7, 39.5, 34.1, 31.0, 25.7, 22.5, 18.6, 18.5, 14.0.

FT-IR (film): 2960, 1760, 1467, 1388, 1230, 1108, 941, 680  $\text{cm}^{-1}$ .



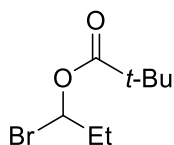

**1-Bromopropyl pivalate.** The title compound was synthesized according to **GP-1** from ZnCl<sub>2</sub> (480 mg, 3.6 mmol), pivaloyl bromide (14.0 g, 85.4 mmol), propionaldehyde (5.1 mL, 71 mmol), and DCM (10 mL). The product was purified by vacuum distillation (b.p. = 45–47 °C, 2.2 Torr). 6.6 g (30 mmol, 42% yield). Colorless oil.

<sup>1</sup>H NMR (400 MHz, CDCl<sub>3</sub>) δ 6.58 (t, *J* = 5.7 Hz, 1H), 2.22 – 2.08 (m, 2H), 1.21 (s, 9H), 1.04 (t, *J* = 7.3 Hz, 3H).

<sup>13</sup>C NMR (101 MHz, CDCl<sub>3</sub>) δ 176.0, 78.0, 39.0, 32.8, 26.8, 10.4.

FT-IR (film): 2973, 1758, 1461, 1370, 1216, 1120, 969, 689 cm<sup>-1</sup>.

### III. Catalytic Enantioconvergent Couplings

#### **General Procedure 2 (GP-2): MTBE as the solvent; electrophile is a liquid.**

In the air, NiBr<sub>2</sub>·diglyme (28.2 mg, 0.081 mmol, 0.10 equiv), (*S,S*)-L\* (61.2 mg, 0.096 mmol, 0.12 equiv), and K<sub>3</sub>PO<sub>4</sub>·H<sub>2</sub>O (552 mg, 2.4 mmol, 3.0 equiv) were added to an oven-dried 40 mL vial equipped with a cross stir bar. The vial was closed with a PTFE septum cap, the joint was wrapped with electrical tape, and the vial was placed under a nitrogen atmosphere by evacuating and backfilling the vial (three cycles). Anhydrous MTBE (8.0 mL) was added to the vial, and the mixture was stirred at room temperature for 30 min, at which time it was a pink heterogeneous solution. A balloon filled with nitrogen was attached to the reaction vial. Next, the electrophile (0.80 mmol, 1.0 equiv), olefin (2.4 mmol, 3.0 equiv), and triethoxysilane (440 μL, 2.4 mmol, 3.0 equiv) were added dropwise in turn to the reaction mixture. The balloon was removed, and the septum cap was sealed with vacuum grease. The mixture was stirred vigorously (1100 rpm) at room temperature for 20 h.

**Work-up:** The reaction mixture was passed through a plug of silica gel, and the vial, the cap, and the silica gel were rinsed with Et<sub>2</sub>O. The filtrate was concentrated, and the residue was purified by flash chromatography on silica gel.

#### **General Procedure 3 (GP-3): MTBE as the solvent; electrophile is a solid.**

In the air, NiBr<sub>2</sub>·diglyme (28.2 mg, 0.081 mmol, 0.10 equiv), (*S,S*)-L\* (61.2 mg, 0.096 mmol, 0.12 equiv), and K<sub>3</sub>PO<sub>4</sub>·H<sub>2</sub>O (552 mg, 2.4 mmol, 3.0 equiv) were added to an oven-dried 40 mL vial equipped with a cross stir bar. The vial was closed with a PTFE septum cap, the joint was wrapped with electrical tape, and the vial was placed under a nitrogen atmosphere by evacuating and backfilling the vial (three cycles). Anhydrous MTBE (4.0 mL) was added to the vial, and the mixture was stirred at room temperature for 30 min, at which time it was a pink heterogeneous solution. A balloon filled with nitrogen was attached to the reaction vial.

Next, in the air, a separate oven-dried 20 mL vial was charged with the electrophile (0.80 mmol, 1.0 equiv). The vial was capped with a PTFE septum cap, and then it was evacuated and backfilled with nitrogen (three cycles). Anhydrous MTBE (4.0 mL) was added to this vial to dissolve the solid. Next, this solution of the electrophile was added in one portion via syringe to the catalyst solution, followed by the addition of olefin (2.4 mmol, 3.0 equiv) and triethoxysilane (440 μL, 2.4 mmol, 3.0 equiv). The balloon was removed, and the septum cap was sealed with vacuum grease. The mixture was stirred vigorously (1100 rpm) at room temperature for 20 h.

**Work-up:** Same as GP-2.

#### **General Procedure 4 (GP-4): *i*-Pr<sub>2</sub>O as the solvent; electrophile is a liquid.**

In the air, NiBr<sub>2</sub>·diglyme (28.2 mg, 0.081 mmol, 0.10 equiv), (*S,S*)-L\* (61.2 mg, 0.096 mmol, 0.12 equiv), and K<sub>3</sub>PO<sub>4</sub>·H<sub>2</sub>O (368 mg, 1.6 mmol, 2.0 equiv) were added to an oven-dried 40 mL vial equipped with a cross stir bar. The vial was closed with a PTFE septum cap, the joint was wrapped with electrical tape, and the vial was placed under a nitrogen atmosphere by

evacuating and backfilling the vial (three cycles). Anhydrous *i*-Pr<sub>2</sub>O (4.0 mL) was added to the vial, and the mixture was stirred at room temperature for 30 min, at which time it was a yellow heterogeneous solution. A balloon filled with nitrogen was attached to the reaction vial. Next, the electrophile (0.80 mmol, 1.0 equiv), olefin (2.4 mmol, 3.0 equiv), and triethoxysilane (300  $\mu$ L, 1.6 mmol, 2.0 equiv) were added dropwise in turn to the reaction mixture. The balloon was removed, and the septum cap was sealed with vacuum grease. The mixture was stirred vigorously (1100 rpm) at room temperature for 20 h.

**Work-up:** Same as **GP-2**.

**General Procedure 5 (GP-5): Determination of enantioselectivity by converting the benzoate product to the corresponding phosphate.** In the air, NaOH (48.0 mg, 1.2 mmol, 6.0 equiv) was added to a solution of the benzoate product (0.20 mmol, 1.0 equiv) in MeOH (6 mL). The reaction mixture was stirred at 50 °C for 24 h, and then the solvent was evaporated, and water (5 mL) was added to the residue. The reaction mixture was extracted with Et<sub>2</sub>O (10 mL  $\times$  3). The combined organic layers were dried over Na<sub>2</sub>SO<sub>4</sub>, filtered, and concentrated to afford the alcohol, which was used directly without further purification. In the air, diphenyl phosphoryl chloride (83  $\mu$ L, 0.38 mmol, 1.9 equiv) was added to a solution of the alcohol and DMAP (48.8 mg, 0.40 mmol, 2.0 equiv) in DCM (4 mL), and then the reaction mixture was stirred at room temperature for 3 h. The reaction mixture was concentrated, and the residue was purified by flash chromatography on silica gel.

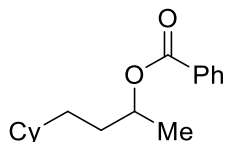

**4-Cyclohexylbutan-2-yl benzoate (Figure 3, entry 1).** The title compound was synthesized according to **GP-2** from 1-bromoethyl benzoate and vinylcyclohexane. The product was purified by column chromatography on silica gel (1:40 Et<sub>2</sub>O/hexanes). Colorless oil.

(*S,S*)-**L**\*: 169 mg, 81% yield, 92% ee; (*R,R*)-**L**\*: 171 mg, 82% yield, 93% ee.

HPLC analysis: The ee was determined via HPLC on a CHIRALPAK IC column (0.5% *i*-PrOH in hexane, 0.5 mL/min); retention times for compound obtained using (*S,S*)-**L**\*: 12.5 min (major), 13.7 min (minor).

<sup>1</sup>H NMR (400 MHz, CDCl<sub>3</sub>)  $\delta$  8.08 – 8.01 (m, 2H), 7.58 – 7.51 (m, 1H), 7.48 – 7.39 (m, 2H), 5.18 – 5.08 (m, 1H), 1.81 – 1.56 (m, 7H), 1.33 (d, *J* = 6.3 Hz, 3H), 1.32 – 1.06 (m, 6H), 0.95 – 0.80 (m, 2H).

<sup>13</sup>C NMR (101 MHz, CDCl<sub>3</sub>)  $\delta$  166.4, 132.8, 131.1, 129.6, 128.4, 72.2, 37.7, 33.52, 33.45, 33.2, 26.8, 26.5, 20.2.

FT-IR (film): 2929, 1716, 1603, 1451, 1276, 1110, 711 cm<sup>-1</sup>.

HRMS (ESI-MS) *m/z* [M+NH<sub>4</sub>]<sup>+</sup> calcd for C<sub>17</sub>H<sub>28</sub>NO<sub>2</sub>: 278.2115, found: 278.2114.

[ $\alpha$ ]<sub>D</sub><sup>23</sup> = -28 (*c* 1.0, CHCl<sub>3</sub>); 92% ee, from (*S,S*)-**L**\*.

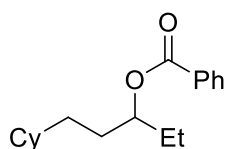

**1-Cyclohexylpentan-3-yl benzoate (Figure 3, entry 2).** The title compound was synthesized according to **GP-2** from 1-bromopropyl benzoate and vinylcyclohexane. The product was purified by column chromatography on silica gel (1:40 Et<sub>2</sub>O/hexanes). Colorless oil.

(*S,S*)-**L**\*: 172 mg, 78% yield, 92% ee; (*R,R*)-**L**\*: 175 mg, 80% yield, 92% ee.

HPLC analysis: The ee was determined via HPLC on a CHIRALPAK IC column (0.5% *i*-PrOH in hexane, 0.5 mL/min); retention times for compound obtained using (*S,S*)-**L**\*: 11.5 min (major), 12.7 min (minor).

<sup>1</sup>H NMR (400 MHz, CDCl<sub>3</sub>) δ 8.09 – 8.03 (m, 2H), 7.59 – 7.52 (m, 1H), 7.49 – 7.40 (m, 2H), 5.11 – 5.01 (m, 1H), 1.78 – 1.58 (m, 9H), 1.33 – 1.06 (m, 6H), 0.95 (t, *J* = 7.5 Hz, 3H), 0.92 – 0.79 (m, 2H).

<sup>13</sup>C NMR (101 MHz, CDCl<sub>3</sub>) δ 166.5, 132.8, 131.0, 129.7, 128.4, 76.6, 37.8, 33.5, 33.4, 33.1, 31.1, 27.1, 26.8, 26.48, 26.46, 9.8.

FT-IR (film): 2920, 1716, 1602, 1450, 1276, 1111, 712 cm<sup>-1</sup>.

HRMS (ESI-MS) *m/z* [M+NH<sub>4</sub>]<sup>+</sup> calcd for C<sub>18</sub>H<sub>30</sub>NO<sub>2</sub>: 292.2271, found: 292.2275.

[α]<sub>D</sub><sup>23</sup> = -8.4 (*c* 1.0, CHCl<sub>3</sub>); 92% ee, from (*S,S*)-**L**\*.

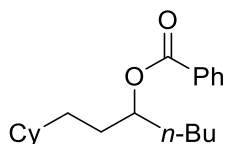

**1-Cyclohexylheptan-3-yl benzoate (Figure 3, entry 3).** The title compound was synthesized according to **GP-2** from 1-bromopentyl benzoate and vinylcyclohexane. The product was purified by column chromatography on silica gel (1:40 Et<sub>2</sub>O/hexanes). Colorless oil.

(*S,S*)-**L**\*: 189 mg, 78% yield, 94% ee; (*R,R*)-**L**\*: 186 mg, 77% yield, 92% ee.

HPLC analysis: The ee was determined after transforming the product to the corresponding phosphate.

<sup>1</sup>H NMR (400 MHz, CDCl<sub>3</sub>) δ 8.08 – 8.02 (m, 2H), 7.59 – 7.52 (m, 1H), 7.48 – 7.40 (m, 2H), 5.15 – 5.06 (m, 1H), 1.77 – 1.58 (m, 9H), 1.42 – 1.29 (m, 4H), 1.29 – 1.08 (m, 6H), 0.94 – 0.78 (m, 5H).

<sup>13</sup>C NMR (101 MHz, CDCl<sub>3</sub>) δ 166.5, 132.8, 131.0, 129.7, 128.4, 75.5, 37.8, 34.0, 33.5, 33.4, 33.1, 31.7, 27.7, 26.8, 26.49, 26.48, 22.8, 14.2.

FT-IR (film): 2921, 1715, 1603, 1453, 1274, 1114, 711 cm<sup>-1</sup>.

HRMS (ESI-MS) *m/z* [M+NH<sub>4</sub>]<sup>+</sup> calcd for C<sub>20</sub>H<sub>34</sub>NO<sub>2</sub>: 320.2584, found: 320.2583.

[α]<sub>D</sub><sup>23</sup> = -2.2 (*c* 1.0, CHCl<sub>3</sub>); 94% ee, from (*S,S*)-**L**\*.

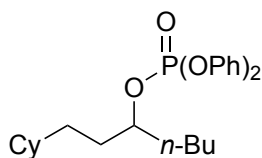

**1-Cyclohexylheptan-3-yl diphenyl phosphate.** The title compound was synthesized according to **GP-5**. The product was purified by column chromatography on silica gel (1:5 EtOAc/hexanes). Colorless oil.

(*S,S*)-**L\***: 81.6 mg, 95% yield, 94% ee; (*R,R*)-**L\***: 78.9 mg, 92% yield, 92% ee.

HPLC analysis: The ee was determined via HPLC on a CHIRALPAK AD column (10% *i*-PrOH in hexane, 1.0 mL/min); retention times for compound obtained using (*S,S*)-**L\***: 12.5 min (major), 13.8 min (minor).

<sup>1</sup>H NMR (400 MHz, CDCl<sub>3</sub>) δ 7.38 – 7.30 (m, 4H), 7.28 – 7.22 (m, 4H), 7.18 (t, *J* = 7.3 Hz, 2H), 4.73 – 4.55 (m, 1H), 1.74 – 1.56 (m, 9H), 1.38 – 1.10 (m, 10H), 0.91 – 0.74 (m, 5H).

<sup>13</sup>C NMR (101 MHz, CDCl<sub>3</sub>) δ 150.9 (d, *J* = 7.1 Hz), 129.7, 125.2, 120.2 (d, *J* = 5.1 Hz), 82.8 (d, *J* = 7.1 Hz), 37.6, 34.7 (d, *J* = 5.1 Hz), 33.3, 33.2, 32.4, 32.33, 32.30, 26.9, 26.7, 26.4 (d, *J* = 1.0 Hz), 22.6, 14.0.

<sup>31</sup>P NMR (162 MHz, CDCl<sub>3</sub>) δ –12.4.

FT-IR (film): 2931, 1594, 1488, 1288, 1192, 1022, 768 cm<sup>-1</sup>.

HRMS (ESI-MS) *m/z* [M+NH<sub>4</sub>]<sup>+</sup> calcd for C<sub>25</sub>H<sub>39</sub>NO<sub>4</sub>P: 448.2611, found: 448.2621.

[α]<sub>D</sub><sup>23</sup> = +1.9 (*c* 1.0, CHCl<sub>3</sub>); 94% ee, from (*S,S*)-**L\***.

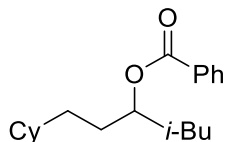

**1-Cyclohexyl-5-methylhexan-3-yl benzoate (Figure 3, entry 4).** The title compound was synthesized according to **GP-2** from 1-bromo-3-methylbutyl benzoate and vinylcyclohexane. The product was purified by column chromatography on silica gel (1:40 Et<sub>2</sub>O/hexanes). Colorless oil.

(*S,S*)-**L\***: 197 mg, 82% yield, 95% ee; (*R,R*)-**L\***: 202 mg, 84% yield, 95% ee.

HPLC analysis: The ee was determined after transforming the product to the corresponding phosphate.

<sup>1</sup>H NMR (400 MHz, CDCl<sub>3</sub>) δ 8.12 – 7.96 (m, 2H), 7.63 – 7.50 (m, 1H), 7.50 – 7.37 (m, 2H), 5.28 – 5.15 (m, 1H), 1.75 – 1.58 (m, 9H), 1.46 – 1.36 (m, 1H), 1.30 – 1.08 (m, 6H), 0.93 (d, *J* = 6.3 Hz, 6H), 0.91 – 0.79 (m, 2H).

<sup>13</sup>C NMR (101 MHz, CDCl<sub>3</sub>) δ 166.5, 132.8, 131.0, 129.7, 128.4, 73.9, 43.5, 37.8, 33.5, 33.4, 33.0, 32.3, 26.8, 26.49, 26.48, 24.0, 23.4, 22.4.

FT-IR (film): 2927, 1715, 1602, 1455, 1274, 1114, 713 cm<sup>-1</sup>.

HRMS (ESI-MS) *m/z* [M+NH<sub>4</sub>]<sup>+</sup> calcd for C<sub>20</sub>H<sub>34</sub>NO<sub>2</sub>: 320.2584, found: 320.2574.

[α]<sub>D</sub><sup>23</sup> = +7.8 (*c* 1.0, CHCl<sub>3</sub>); 95% ee, from (*S,S*)-**L\***.

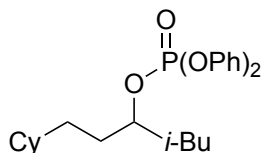

**1-Cyclohexyl-5-methylhexan-3-yl diphenyl phosphate.** The title compound was synthesized according to **GP-5**. The product was purified by column chromatography on silica gel (1:5 EtOAc/hexanes). Colorless oil.

(*S,S*)-**L\***: 79.0 mg, 92% yield, 95% ee; (*R,R*)-**L\***: 79.0 mg, 92% yield, 95% ee.

HPLC analysis: The ee was determined via HPLC on a CHIRALPAK AD column (10% *i*-PrOH in hexane, 1.0 mL/min); retention times for compound obtained using (*S,S*)-**L\***: 11.9 min (minor), 15.2 min (major).

<sup>1</sup>H NMR (400 MHz, CDCl<sub>3</sub>) δ 7.37 – 7.29 (m, 4H), 7.27 – 7.20 (m, 4H), 7.20 – 7.13 (m, 2H), 4.74 – 4.63 (m, 1H), 1.74 – 1.56 (m, 9H), 1.41 – 1.30 (m, 1H), 1.25 – 1.05 (m, 6H), 0.94 – 0.74 (m, 8H).

<sup>13</sup>C NMR (101 MHz, CDCl<sub>3</sub>) δ 150.9 (d, *J* = 7.1 Hz), 129.7 (d, *J* = 1.0 Hz), 125.2 (d, *J* = 1.0 Hz), 120.2 (d, *J* = 5.1 Hz), 81.2 (d, *J* = 6.1 Hz), 44.2 (d, *J* = 6.1 Hz), 37.6, 33.3, 33.2, 33.1, 33.0, 32.1, 26.7, 26.4 (d, *J* = 1.0 Hz), 24.4, 23.1, 22.2.

<sup>31</sup>P NMR (162 MHz, CDCl<sub>3</sub>) δ –12.4.

FT-IR (film): 2924, 1591, 1490, 1286, 1197, 1020, 762 cm<sup>-1</sup>.

HRMS (ESI-MS) *m/z* [M+NH<sub>4</sub>]<sup>+</sup> calcd for C<sub>25</sub>H<sub>39</sub>NO<sub>4</sub>P: 448.2611, found: 448.2619.

[α]<sub>D</sub><sup>23</sup> = +10.8 (*c* 1.0, CHCl<sub>3</sub>); 95% ee, from (*S,S*)-**L\***.

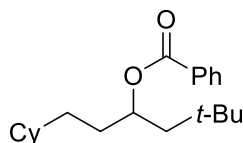

**1-Cyclohexyl-5,5-dimethylhexan-3-yl benzoate (Figure 3, entry 5).** The title compound was synthesized according to **GP-2** from 1-bromo-3,3-dimethylbutyl benzoate and vinylcyclohexane. The product was purified by column chromatography on silica gel (1:40 Et<sub>2</sub>O/hexanes). Colorless oil.

(*S,S*)-**L\***: 217 mg, 86% yield, 94% ee; (*R,R*)-**L\***: 209 mg, 83% yield, 94% ee.

HPLC analysis: The ee was determined after transforming the product to the corresponding phosphate.

<sup>1</sup>H NMR (400 MHz, CDCl<sub>3</sub>) δ 8.08 – 8.01 (m, 2H), 7.58 – 7.51 (m, 1H), 7.47 – 7.40 (m, 2H), 5.28 – 5.20 (m, 1H), 1.78 – 1.56 (m, 8H), 1.48 (dd, *J* = 14.8, 2.2 Hz, 1H), 1.27 – 1.07 (m, 6H), 0.93 (s, 9H), 0.90 – 0.79 (m, 2H).

<sup>13</sup>C NMR (101 MHz, CDCl<sub>3</sub>) δ 166.3, 132.8, 131.1, 129.7, 128.4, 73.2, 47.6, 37.9, 33.8, 33.5, 33.4, 32.8, 30.3, 30.1, 26.8, 26.5.

FT-IR (film): 2931, 1714, 1604, 1454, 1272, 1118, 709 cm<sup>-1</sup>.

HRMS (ESI-MS) *m/z* [M+NH<sub>4</sub>]<sup>+</sup> calcd for C<sub>21</sub>H<sub>36</sub>NO<sub>2</sub>: 334.2741, found: 334.2750.

$[\alpha]^{23}_D = +13.8$  ( $c$  1.0,  $\text{CHCl}_3$ ); 94% ee, from (*S,S*)-**L\***.

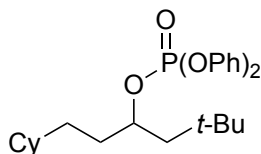

**1-Cyclohexyl-5,5-dimethylhexan-3-yl diphenyl phosphate.** The title compound was synthesized according to **GP-5**. The product was purified by column chromatography on silica gel (1:5 EtOAc/hexanes). Colorless oil.

(*S,S*)-**L\***: 69.6 mg, 78% yield, 94% ee; (*R,R*)-**L\***: 74.4 mg, 83% yield, 94% ee.

HPLC analysis: The ee was determined via HPLC on a CHIRALPAK AD column (10% *i*-PrOH in hexane, 1.0 mL/min); retention times for compound obtained using (*S,S*)-**L\***: 11.2 min (minor), 15.6 min (major).

$^1\text{H}$  NMR (400 MHz,  $\text{CDCl}_3$ )  $\delta$  7.38 – 7.30 (m, 4H), 7.27 – 7.22 (m, 4H), 7.22 – 7.14 (m, 2H), 4.85 – 4.69 (m, 1H), 1.78 – 1.58 (m, 8H), 1.53 – 1.44 (m, 1H), 1.31 – 1.06 (m, 6H), 0.95 (s, 9H), 0.89 – 0.74 (m, 2H).

$^{13}\text{C}$  NMR (101 MHz,  $\text{CDCl}_3$ )  $\delta$  150.8 (d,  $J = 7.1$  Hz), 129.7 (d,  $J = 1.0$  Hz), 125.1 (d,  $J = 2.0$  Hz), 120.3 (d,  $J = 2.0$  Hz), 120.2 (d,  $J = 2.0$  Hz), 80.7 (d,  $J = 7.1$  Hz), 48.4 (d,  $J = 7.1$  Hz), 37.7, 34.7 (d,  $J = 2.0$  Hz), 33.33, 33.26, 32.0, 30.1, 29.9, 26.7, 26.4.

$^{31}\text{P}$  NMR (162 MHz,  $\text{CDCl}_3$ )  $\delta$  -12.9.

FT-IR (film): 2938, 1596, 1495, 1288, 1202, 1010, 779  $\text{cm}^{-1}$ .

HRMS (ESI-MS)  $m/z$   $[\text{M}+\text{NH}_4]^+$  calcd for  $\text{C}_{26}\text{H}_{41}\text{NO}_4\text{P}$ : 462.2768, found: 462.2769.

$[\alpha]^{23}_D = +13.9$  ( $c$  1.0,  $\text{CHCl}_3$ ); 94% ee, from (*S,S*)-**L\***.

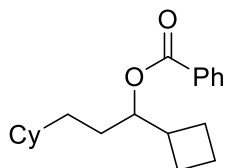

**1-Cyclobutyl-3-cyclohexylpropyl benzoate (Figure 3, entry 6).** The title compound was synthesized according to **GP-3** from bromo(cyclobutyl)methyl benzoate and vinylcyclohexane. The product was purified by column chromatography on silica gel (1:40 Et<sub>2</sub>O/hexanes). Colorless oil.

(*S,S*)-**L\***: 195 mg, 81% yield, 98% ee; (*R,R*)-**L\***: 190 mg, 79% yield, 98% ee.

HPLC analysis: The ee was determined after transforming the product to the corresponding phosphate.

$^1\text{H}$  NMR (400 MHz,  $\text{CDCl}_3$ )  $\delta$  8.10 – 8.04 (m, 2H), 7.59 – 7.53 (m, 1H), 7.49 – 7.41 (m, 2H), 5.11 (q,  $J = 6.4$  Hz, 1H), 2.68 – 2.54 (m, 1H), 2.07 – 1.91 (m, 3H), 1.91 – 1.73 (m, 3H), 1.73 – 1.50 (m, 7H), 1.29 – 1.02 (m, 6H), 0.93 – 0.76 (m, 2H).

$^{13}\text{C}$  NMR (101 MHz,  $\text{CDCl}_3$ )  $\delta$  166.7, 132.8, 131.0, 129.7, 128.4, 78.1, 39.3, 37.8, 33.5, 33.4, 33.1, 29.5, 26.8, 26.49, 26.47, 24.7, 24.4, 18.2.

FT-IR (film): 2921, 1716, 1603, 1451, 1263, 1114, 708  $\text{cm}^{-1}$ .

HRMS (ESI-MS)  $m/z$   $[\text{M}+\text{Na}]^+$  calcd for  $\text{C}_{20}\text{H}_{28}\text{NaO}_2$ : 323.1982, found: 323.1966.

$[\alpha]^{23}_{\text{D}} = -4.0$  ( $c$  1.0,  $\text{CHCl}_3$ ); 98% ee, from (*S,S*)-**L\***.

**Gram-scale reaction:** In the air,  $\text{NiBr}_2 \cdot \text{diglyme}$  (176 mg, 0.50 mmol, 0.10 equiv), (*S,S*)-**L\*** (383 mg, 0.60 mmol, 0.12 equiv), and  $\text{K}_3\text{PO}_4 \cdot \text{H}_2\text{O}$  (3.45 g, 15.0 mmol, 3.0 equiv) were added to an oven-dried 100 mL round-bottom flask equipped with a stir bar. The flask was closed with a rubber septum cap, the joint was wrapped with electrical tape, and the flask was placed under a nitrogen atmosphere by evacuating and backfilling the flask (three cycles). Anhydrous MTBE (20 mL) was added to the flask, and the mixture was stirred at room temperature for 30 min, at which time it was a pink heterogeneous solution. A balloon filled with nitrogen was attached to the reaction flask. In the air, a separate oven-dried 40 mL vial was charged with bromo(cyclobutyl)methyl benzoate (1.34 g, 5.0 mmol, 1.0 equiv). The vial was capped with a PTFE septum cap, and then it was evacuated and backfilled with nitrogen (three cycles). Anhydrous MTBE (20 mL) was added to the vial to dissolve the electrophile. Next, this solution of the electrophile was added in one portion via syringe to the catalyst solution, followed by the addition of vinyl cyclohexane (2.05 mL, 15.0 mmol, 3.0 equiv) and triethoxysilane (2.8 mL, 15.2 mmol, 3.0 equiv). The balloon was removed, and the septum was sealed with electrical tape. The reaction mixture was stirred vigorously (1100 rpm) at room temperature for 20 h. Next, the reaction mixture was passed through a 5 cm column of silica gel, and the flask, the septum, and the silica gel were rinsed with  $\text{Et}_2\text{O}$ . The filtrate was concentrated, and the residue was purified by flash chromatography on silica gel (1:40  $\text{Et}_2\text{O}$ /hexanes). Colorless oil.

(*S,S*)-**L\***: 1.21 g, 81% yield, 99% ee.

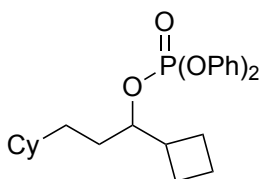

**1-Cyclobutyl-3-cyclohexylpropyl diphenyl phosphate.** The title compound was synthesized according to **GP-5**. The product was purified by column chromatography on silica gel (1:5  $\text{EtOAc}$ /hexanes). Colorless oil.

(*S,S*)-**L\***: 76.8 mg, 90% yield, 98% ee; (*R,R*)-**L\***: 70.4 mg, 82% yield, 98% ee.

HPLC analysis: The ee was determined via HPLC on a CHIRALPAK IC column (10% *i*-PrOH in hexane, 1.0 mL/min); retention times for compound obtained using (*S,S*)-**L\***: 7.8 min (major), 8.7 min (minor).



$^1\text{H}$  NMR (400 MHz,  $\text{CDCl}_3$ )  $\delta$  7.37 – 7.28 (m, 4H), 7.26 – 7.20 (m, 4H), 7.20 – 7.13 (m, 2H), 4.60 – 4.49 (m, 1H), 2.65 – 2.50 (m, 1H), 2.03 – 1.76 (m, 5H), 1.72 – 1.48 (m, 8H), 1.24 – 1.04 (m, 6H), 0.86 – 0.69 (m, 2H).

$^{13}\text{C}$  NMR (101 MHz,  $\text{CDCl}_3$ )  $\delta$  150.94 (d,  $J = 7.1$  Hz), 150.93 (d,  $J = 7.1$  Hz), 129.7, 125.2 (d,  $J = 1.0$  Hz), 120.3 (d,  $J = 2.0$  Hz), 120.2 (d,  $J = 1.0$  Hz), 86.1 (d,  $J = 7.1$  Hz), 39.5 (d,  $J = 5.1$  Hz), 37.6, 33.4, 33.1, 32.2, 30.4, 30.3, 26.7, 26.4 (d,  $J = 2.0$  Hz), 24.8, 24.4, 17.8.

$^{31}\text{P}$  NMR (162 MHz,  $\text{CDCl}_3$ )  $\delta$  -12.1.

FT-IR (film): 3483, 2922, 1596, 1488, 1286, 1204, 1016, 756  $\text{cm}^{-1}$ .

HRMS (ESI-MS)  $m/z$   $[\text{M}+\text{NH}_4]^+$  calcd for  $\text{C}_{25}\text{H}_{37}\text{NO}_4\text{P}$ : 446.2455, found: 446.2461.

$[\alpha]_D^{23} = +3.9$  ( $c$  1.0,  $\text{CHCl}_3$ ); 98% ee, from (*S,S*)-**L\***.

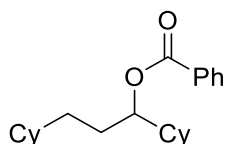

**1,3-Dicyclohexylpropyl benzoate (Figure 3, entry 7).** The title compound was synthesized according to **GP-3** from bromo(cyclohexyl)methyl benzoate and vinylcyclohexane. The product was purified by column chromatography on silica gel (1:40 Et<sub>2</sub>O/hexanes). Colorless oil.

(*S,S*)-**L\***: 178 mg, 68% yield, 96% ee; (*R,R*)-**L\***: 186 mg, 71% yield, 95% ee.

HPLC analysis: The ee was determined after transforming the product to the corresponding phosphate.

$^1\text{H}$  NMR (400 MHz,  $\text{CDCl}_3$ )  $\delta$  8.09 – 8.02 (m, 2H), 7.58 – 7.51 (m, 1H), 7.45 (t,  $J = 7.7$  Hz, 2H), 4.99 (q,  $J = 6.0$  Hz, 1H), 1.84 – 1.58 (m, 13H), 1.29 – 1.05 (m, 11H), 0.94 – 0.76 (m, 2H).

$^{13}\text{C}$  NMR (101 MHz,  $\text{CDCl}_3$ )  $\delta$  166.5, 132.8, 131.0, 129.7, 128.4, 79.1, 41.5, 37.8, 33.5, 33.3, 33.2, 29.3, 28.7, 28.2, 26.8, 26.6, 26.48, 26.46, 26.32, 26.26.

FT-IR (film): 2937, 1716, 1602, 1454, 1270, 713  $\text{cm}^{-1}$ .

HRMS (ESI-MS)  $m/z$   $[\text{M}+\text{NH}_4]^+$  calcd for  $\text{C}_{22}\text{H}_{36}\text{NO}_2$ : 346.2741, found: 346.2722.

$[\alpha]_D^{23} = -7.8$  ( $c$  1.0,  $\text{CHCl}_3$ ); 96% ee, from (*S,S*)-**L\***.

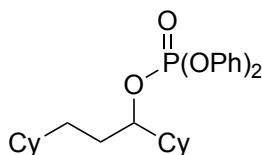

**1,3-Dicyclohexylpropyl diphenyl phosphate.** The title compound was synthesized according to **GP-5**. The product was purified by column chromatography on silica gel (1:5 EtOAc/hexanes). Colorless oil.

(*S,S*)-**L\***: 75.4 mg, 83% yield, 96% ee; (*R,R*)-**L\***: 69.2 mg, 76% yield, 95% ee.

HPLC analysis: The ee was determined via HPLC on a CHIRALPAK AS column (5% *i*-PrOH in hexane, 1.0 mL/min); retention times for compound obtained using (*S,S*)-L\*: 6.3 min (minor), 10.7 min (major).

<sup>1</sup>H NMR (400 MHz, CDCl<sub>3</sub>) δ 7.37 – 7.30 (m, 4H), 7.27 – 7.22 (m, 4H), 7.21 – 7.15 (m, 2H), 4.45 (ddd, *J* = 12.0, 7.2, 4.9 Hz, 1H), 1.79 – 1.56 (m, 13H), 1.29 – 1.00 (m, 11H), 0.89 – 0.72 (m, 2H).

<sup>13</sup>C NMR (101 MHz, CDCl<sub>3</sub>) δ 151.0 (d, *J* = 7.1 Hz), 150.9 (d, *J* = 8.1 Hz), 129.7, 125.16 (d, *J* = 2.0 Hz), 125.15 (d, *J* = 1.0 Hz), 120.3 (d, *J* = 5.1 Hz), 120.2 (d, *J* = 5.1 Hz), 86.9 (d, *J* = 7.1 Hz), 41.7 (d, *J* = 5.1 Hz), 37.6, 33.4, 33.1, 32.5, 29.2 (d, *J* = 4.0 Hz), 28.4, 27.9, 26.7, 26.42, 26.40, 26.38, 26.2, 26.1.

<sup>31</sup>P NMR (162 MHz, CDCl<sub>3</sub>) δ –12.2.

FT-IR (film): 2925, 1592, 1494, 1292, 1191, 1010, 768 cm<sup>-1</sup>.

HRMS (ESI-MS) *m/z* [M+NH<sub>4</sub>]<sup>+</sup> calcd for C<sub>27</sub>H<sub>41</sub>NO<sub>4</sub>P: 474.2768, found: 474.2768.

[α]<sub>D</sub><sup>23</sup> = –7.6 (*c* 1.0, CHCl<sub>3</sub>); 96% ee, from (*S,S*)-L\*.

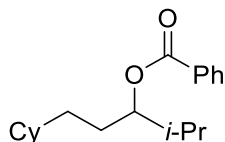

**1-Cyclohexyl-4-methylpentan-3-yl benzoate (Figure 3, entry 8).** The title compound was synthesized according to **GP-2** from 1-bromo-2-methylpropyl benzoate and vinylcyclohexane. The product was purified by column chromatography on silica gel (1:40 Et<sub>2</sub>O/hexanes). Colorless oil.

(*S,S*)-L\*: 161 mg, 70% yield, 94% ee; (*R,R*)-L\*: 154 mg, 67% yield, 95% ee.

HPLC analysis: The ee was determined via HPLC on a CHIRALPAK IC column (0.5% *i*-PrOH in hexane, 0.5 mL/min); retention times for compound obtained using (*S,S*)-L\*: 10.2 min (major), 11.2 min (minor).

<sup>1</sup>H NMR (400 MHz, CDCl<sub>3</sub>) δ 8.15 – 7.96 (m, 2H), 7.64 – 7.51 (m, 1H), 7.50 – 7.38 (m, 2H), 4.98 (dt, *J* = 7.1, 5.3 Hz, 1H), 2.05 – 1.88 (m, 1H), 1.78 – 1.55 (m, 7H), 1.27 – 1.07 (m, 6H), 0.97 (t, *J* = 7.0 Hz, 6H), 0.92 – 0.76 (m, 2H).

<sup>13</sup>C NMR (101 MHz, CDCl<sub>3</sub>) δ 166.6, 132.8, 131.0, 129.7, 128.4, 79.6, 37.8, 33.5, 33.4, 33.3, 31.6, 28.7, 26.8, 26.49, 26.47, 18.9, 17.7.

FT-IR (film): 2922, 1715, 1602, 1452, 1270, 1110, 709 cm<sup>-1</sup>.

HRMS (ESI-MS) *m/z* [M+Na]<sup>+</sup> calcd for C<sub>19</sub>H<sub>28</sub>NaO<sub>2</sub>: 311.1982, found: 311.1984.

[α]<sub>D</sub><sup>23</sup> = –8.1 (*c* 1.0, CHCl<sub>3</sub>); 94% ee, from (*S,S*)-L\*.

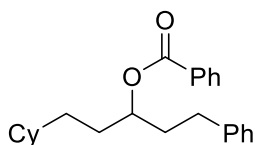

**1-Cyclohexyl-5-phenylpentan-3-yl benzoate (Figure 3, entry 9).** The title compound was synthesized according to **GP-3** from 1-bromo-3-phenylpropyl benzoate and vinylcyclohexane. The product was purified by column chromatography on silica gel (1:40 Et<sub>2</sub>O/hexanes). Colorless oil.

(*S,S*)-**L\***: 217 mg, 78% yield, 92% ee; (*R,R*)-**L\***: 219 mg, 78% yield, 92% ee.

HPLC analysis: The ee was determined via HPLC on a CHIRALCEL OD column (1% *i*-PrOH in hexane, 1.0 mL/min); retention times for compound obtained using (*S,S*)-**L\***: 5.1 min (major), 5.8 min (minor).

<sup>1</sup>H NMR (400 MHz, CDCl<sub>3</sub>) δ 8.12 – 8.05 (m, 2H), 7.61 – 7.54 (m, 1H), 7.51 – 7.42 (m, 2H), 7.32 – 7.25 (m, 2H), 7.23 – 7.15 (m, 3H), 5.24 – 5.14 (m, 1H), 2.82 – 2.63 (m, 2H), 2.14 – 1.93 (m, 2H), 1.84 – 1.58 (m, 7H), 1.37 – 1.06 (m, 6H), 0.97 – 0.79 (m, 2H).

<sup>13</sup>C NMR (101 MHz, CDCl<sub>3</sub>) δ 166.5, 141.8, 132.9, 130.8, 129.7, 128.53, 128.45, 126.0, 75.0, 37.7, 36.1, 33.43, 33.40, 32.9, 31.9, 31.7, 26.8, 26.5.

FT-IR (film): 2928, 1716, 1603, 1455, 1276, 1111, 716 cm<sup>-1</sup>.

HRMS (ESI-MS) *m/z* [M+NH<sub>4</sub>]<sup>+</sup> calcd for C<sub>24</sub>H<sub>34</sub>NO<sub>2</sub>: 368.2584, found: 368.2584.

[α]<sub>D</sub><sup>23</sup> = +5.6 (*c* 1.0, CHCl<sub>3</sub>); 92% ee, from (*S,S*)-**L\***.

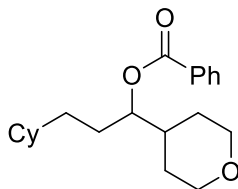

**3-Cyclohexyl-1-(tetrahydro-2H-pyran-4-yl)propyl benzoate (Figure 3, entry 10).** The title compound was synthesized according to **GP-2** from bromo(tetrahydro-2H-pyran-4-yl)methyl benzoate and vinylcyclohexane. The product was purified by column chromatography on silica gel (1:4 Et<sub>2</sub>O/hexanes). Colorless oil.

(*S,S*)-**L\***: 184 mg, 70% yield, 97% ee; (*R,R*)-**L\***: 177 mg, 67% yield, 96% ee.

HPLC analysis: The ee was determined via HPLC on a CHIRALPAK IC column (3% *i*-PrOH in hexane, 1.0 mL/min); retention times for compound obtained using (*S,S*)-**L\***: 9.3 min (major), 12.1 min (minor).

<sup>1</sup>H NMR (400 MHz, CDCl<sub>3</sub>) δ 8.16 – 7.99 (m, 2H), 7.60 – 7.53 (m, 1H), 7.49 – 7.42 (m, 2H), 5.02 (q, *J* = 6.1 Hz, 1H), 4.09 – 3.90 (m, 2H), 3.45 – 3.28 (m, 2H), 1.96 – 1.82 (m, 1H), 1.73 – 1.42 (m, 11H), 1.31 – 1.04 (m, 6H), 0.93 – 0.77 (m, 2H).

<sup>13</sup>C NMR (101 MHz, CDCl<sub>3</sub>) δ 166.5, 133.0, 130.6, 129.7, 128.5, 78.0, 68.1, 67.9, 38.9, 37.8, 33.5, 33.3, 33.0, 29.3, 28.5, 28.2, 26.7, 26.5, 26.4.

FT-IR (film): 2920, 1715, 1602, 1454, 1274, 710 cm<sup>-1</sup>.

HRMS (ESI-MS) *m/z* [M+H]<sup>+</sup> calcd for C<sub>21</sub>H<sub>31</sub>O<sub>3</sub>: 331.2268, found: 331.2267.

$[\alpha]_D^{23} = -9.8$  ( $c$  1.0,  $\text{CHCl}_3$ ); 97% ee, from (*S,S*)-**L\***.

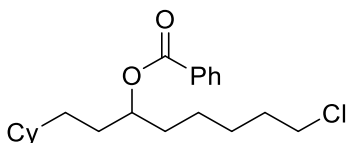

**8-Chloro-1-cyclohexyloctan-3-yl benzoate (Figure 3, entry 11).** The title compound was synthesized according to **GP-2** from 1-bromo-6-chlorohexyl benzoate and vinylcyclohexane. The product was purified by column chromatography on silica gel (1:40 Et<sub>2</sub>O/hexanes). Colorless oil.

(*S,S*)-**L\***: 199 mg, 71% yield, 92% ee; (*R,R*)-**L\***: 196 mg, 70% yield, 92% ee.

HPLC analysis: The ee was determined via HPLC on a CHIRALPAK AD column (1% *i*-PrOH in hexane, 1.0 mL/min); retention times for compound obtained using (*S,S*)-**L\***: 6.3 min (minor), 7.8 min (major).

<sup>1</sup>H NMR (400 MHz,  $\text{CDCl}_3$ )  $\delta$  8.09 – 8.00 (m, 2H), 7.60 – 7.52 (m, 1H), 7.49 – 7.40 (m, 2H), 5.15 – 5.06 (m, 1H), 3.51 (t,  $J = 6.7$  Hz, 2H), 1.81 – 1.60 (m, 11H), 1.53 – 1.33 (m, 4H), 1.30 – 1.09 (m, 6H), 0.96 – 0.78 (m, 2H).

<sup>13</sup>C NMR (101 MHz,  $\text{CDCl}_3$ )  $\delta$  166.5, 132.9, 130.9, 129.7, 128.5, 75.3, 45.1, 37.7, 34.2, 33.5, 33.4, 33.1, 32.6, 31.7, 27.0, 26.8, 26.47, 26.46, 24.8.

FT-IR (film): 2922, 1716, 1603, 1450, 1278, 1114, 710  $\text{cm}^{-1}$ .

HRMS (ESI-MS)  $m/z$   $[\text{M}+\text{NH}_4]^+$  calcd for  $\text{C}_{21}\text{H}_{35}\text{ClNO}_2$ : 368.2351, found: 368.2353.

$[\alpha]_D^{23} = +0.86$  ( $c$  1.0,  $\text{CHCl}_3$ ); 92% ee, from (*S,S*)-**L\***.

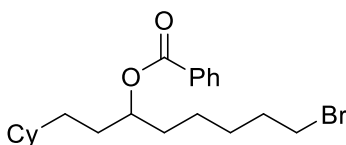

**8-Bromo-1-cyclohexyloctan-3-yl benzoate (Figure 3, entry 12).** The title compound was synthesized according to **GP-2** from 1,6-dibromohexyl benzoate and vinylcyclohexane. The product was purified by column chromatography on silica gel (1:40 Et<sub>2</sub>O/hexanes). Colorless oil.

(*S,S*)-**L\***: 204 mg, 65% yield, 94% ee; (*R,R*)-**L\***: 204 mg, 65% yield, 92% ee.

HPLC analysis: The ee was determined via HPLC on a CHIRALPAK IC column (0.5% *i*-PrOH in hexane, 0.5 mL/min); retention times for compound obtained using (*S,S*)-**L\***: 14.4 min (major), 16.6 min (minor).

<sup>1</sup>H NMR (400 MHz,  $\text{CDCl}_3$ )  $\delta$  8.14 – 7.98 (m, 2H), 7.65 – 7.51 (m, 1H), 7.51 – 7.39 (m, 2H), 5.20 – 5.03 (m, 1H), 3.38 (t,  $J = 6.8$  Hz, 2H), 1.91 – 1.80 (m, 2H), 1.76 – 1.57 (m, 9H), 1.52 – 1.32 (m, 4H), 1.32 – 1.05 (m, 6H), 0.94 – 0.78 (m, 2H).

<sup>13</sup>C NMR (101 MHz,  $\text{CDCl}_3$ )  $\delta$  166.5, 132.9, 130.9, 129.7, 128.5, 75.3, 37.7, 34.1, 33.9, 33.5, 33.4, 33.1, 32.8, 31.7, 28.3, 26.8, 26.47, 26.46, 24.7.

FT-IR (film): 2930, 1715, 1602, 1449, 1272, 1113, 710  $\text{cm}^{-1}$ .

HRMS (ESI-MS)  $m/z$   $[\text{M}+\text{NH}_4]^+$  calcd for  $\text{C}_{21}\text{H}_{35}\text{BrNO}_2$ : 412.1846, found: 412.1845.

$[\alpha]^{23}_{\text{D}} = +1.1$  ( $c$  1.0,  $\text{CHCl}_3$ ); 94% ee, from (*S,S*)-**L\***.

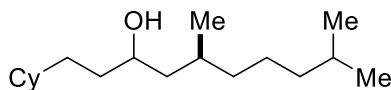

**(5*S*)-1-Cyclohexyl-5,9-dimethyldecan-3-ol (Figure 3, entries 13 and 14).** The title compound was synthesized according to **GP-2** and **GP-5** (the benzoates could not be properly purified) from (3*S*)-1-bromo-3,7-dimethyloctyl benzoate and vinylcyclohexane. The product was purified by column chromatography on silica gel (1:9  $\text{Et}_2\text{O}$ /hexanes). Colorless oil.

(*S,S*)-**L\***: 167 mg, 78% yield, 4:96 d.r.; (*R,R*)-**L\***: 169 mg, 79% yield, 96:4 d.r.

HPLC analysis: The d.r. was determined after transforming the product to the corresponding phosphate.

NMR data for the product from (*S,S*)-**L\***:

$^1\text{H}$  NMR (400 MHz,  $\text{CDCl}_3$ )  $\delta$  3.70 – 3.59 (m, 1H), 1.77 – 1.57 (m, 6H), 1.57 – 1.37 (m, 4H), 1.36 – 1.09 (m, 14H), 0.95 – 0.80 (m, 11H).

$^{13}\text{C}$  NMR (101 MHz,  $\text{CDCl}_3$ )  $\delta$  70.2, 45.2, 39.4, 38.3, 38.0, 35.8, 33.6, 33.54, 33.47, 29.4, 28.1, 26.8, 26.54, 26.52, 24.9, 22.84, 22.76, 19.4.

NMR data for the product from (*R,R*)-**L\***:

$^1\text{H}$  NMR (400 MHz,  $\text{CDCl}_3$ )  $\delta$  3.72 – 3.58 (m, 1H), 1.76 – 1.42 (m, 8H), 1.39 – 1.11 (m, 15H), 1.10 – 1.01 (m, 1H), 0.96 – 0.79 (m, 11H).

$^{13}\text{C}$  NMR (101 MHz,  $\text{CDCl}_3$ )  $\delta$  70.5, 45.4, 39.5, 37.9, 37.0, 35.2, 33.7, 33.44, 33.36, 29.8, 28.1, 26.8, 26.54, 26.52, 24.7, 22.9, 22.7, 20.6.

FT-IR (film): 3341, 2920, 1717, 1456, 1070  $\text{cm}^{-1}$ .

HRMS (ESI-MS)  $m/z$   $[\text{M}-\text{OH}]^+$  calcd for  $\text{C}_{18}\text{H}_{35}$ : 251.2733, found: 251.2727.

$[\alpha]^{23}_{\text{D}} = +9.4$  ( $c$  1.0,  $\text{CHCl}_3$ ); 4:96 d.r., from (*S,S*)-**L\***.

$[\alpha]^{23}_{\text{D}} = -5.7$  ( $c$  1.0,  $\text{CHCl}_3$ ); 96:4 d.r., from (*R,R*)-**L\***.

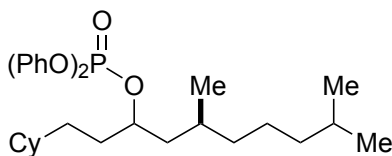

**(5*S*)-1-Cyclohexyl-5,9-dimethyldecan-3-yl diphenyl phosphate.** The title compound was synthesized according to **GP-5**. The product was purified by column chromatography on silica gel (1:5  $\text{EtOAc}$ /hexanes). Colorless oil.

(*S,S*)-**L\***: 102 mg, 99% yield, 4:96 d.r.; (*R,R*)-**L\***: 99.4 mg, 99% yield, 96:4 d.r.

HPLC analysis: The d.r. was determined via HPLC on a CHIRALPAK AD column (10% *i*-PrOH in hexane, 1.0 mL/min); retention times for compound obtained using (*S,S*)-**L\***: 8.1 min (minor), 10.5 min (major).

NMR data for the product from (*S,S*)-L\*:

<sup>1</sup>H NMR (400 MHz, CDCl<sub>3</sub>) δ 7.36 – 7.29 (m, 4H), 7.26 – 7.20 (m, 4H), 7.20 – 7.13 (m, 2H), 4.79 – 4.63 (m, 1H), 1.78 – 1.57 (m, 8H), 1.57 – 1.41 (m, 2H), 1.33 – 1.01 (m, 13H), 0.94 – 0.71 (m, 11H).

<sup>13</sup>C NMR (101 MHz, CDCl<sub>3</sub>) δ 150.93 (d, *J* = 7.1 Hz), 150.92 (d, *J* = 7.1 Hz), 129.8, 125.2, 120.3 (d, *J* = 4.0 Hz), 120.2 (d, *J* = 5.1 Hz), 81.2 (d, *J* = 7.1 Hz), 42.7 (d, *J* = 6.1 Hz), 39.3, 37.8, 37.7, 33.50, 33.47, 33.34, 33.26, 32.3, 29.0, 28.1, 26.7, 26.4, 24.7, 22.8, 22.7, 19.4.

<sup>31</sup>P NMR (162 MHz, CDCl<sub>3</sub>) δ –12.4.

NMR data for the product from (*R,R*)-L\*:

<sup>1</sup>H NMR (400 MHz, CDCl<sub>3</sub>) δ 7.36 – 7.28 (m, 4H), 7.26 – 7.20 (m, 4H), 7.20 – 7.13 (m, 2H), 4.77 – 4.64 (m, 1H), 1.73 – 1.57 (m, 7H), 1.57 – 1.42 (m, 4H), 1.37 – 1.00 (m, 12H), 0.92 – 0.77 (m, 11H).

<sup>13</sup>C NMR (101 MHz, CDCl<sub>3</sub>) δ 150.9 (d, *J* = 7.1 Hz), 129.8, 125.2 (d, *J* = 1.0 Hz), 120.2 (d, *J* = 5.1 Hz), 81.3 (d, *J* = 7.1 Hz), 42.5 (d, *J* = 5.1 Hz), 39.3, 37.6, 37.0, 33.4, 33.2, 32.64, 32.60, 32.0, 29.3, 28.1, 26.7, 26.4 (d, *J* = 2.0 Hz), 24.6, 22.8, 22.7, 20.0.

<sup>31</sup>P NMR (162 MHz, CDCl<sub>3</sub>) δ –12.4.

FT-IR (film): 2926, 2365, 1594, 1486, 1384, 1287, 1017, 770, 688 cm<sup>-1</sup>.

HRMS (ESI-MS) *m/z* [M+NH<sub>4</sub>]<sup>+</sup> calcd for C<sub>30</sub>H<sub>49</sub>NO<sub>4</sub>P: 518.3394, found: 518.3392.

[α]<sub>D</sub><sup>23</sup> = +11.9 (*c* 1.0, CHCl<sub>3</sub>); 4:96 d.r., from (*S,S*)-L\*.

[α]<sub>D</sub><sup>23</sup> = –8.6 (*c* 1.0, CHCl<sub>3</sub>); 96:4 d.r., from (*R,R*)-L\*.

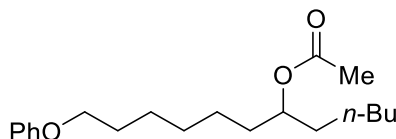

**12-Phenyloxydodecan-6-yl acetate (Figure 3, entry 15).** The title compound was synthesized according to **GP-4** from 1-bromohexyl acetate and (hex-5-en-1-yloxy)benzene. The product was purified by column chromatography on silica gel (1:9 Et<sub>2</sub>O/hexanes). Colorless oil.

(*S,S*)-L\*: 162 mg, 63% yield, 93% ee; (*R,R*)-L\*: 167 mg, 65% yield, 92% ee.

HPLC analysis: The ee was determined via HPLC on a CHIRALCEL OD column (2% *i*-PrOH in hexane, 1.0 mL/min); retention times for compound obtained using (*S,S*)-L\*: 10.8 min (minor), 14.0 min (major).

<sup>1</sup>H NMR (400 MHz, CDCl<sub>3</sub>) δ 7.32 – 7.23 (m, 2H), 6.96 – 6.86 (m, 3H), 4.94 – 4.82 (m, 1H), 3.95 (t, *J* = 6.5 Hz, 2H), 2.04 (s, 3H), 1.83 – 1.71 (m, 2H), 1.59 – 1.41 (m, 6H), 1.40 – 1.18 (m, 10H), 0.95 – 0.81 (m, 3H).

<sup>13</sup>C NMR (101 MHz, CDCl<sub>3</sub>) δ 171.1, 159.2, 129.5, 120.6, 114.6, 74.5, 67.9, 34.21, 34.18, 31.9, 29.4, 29.3, 26.1, 25.4, 25.1, 22.7, 21.4, 14.2.

FT-IR (film): 2928, 1732, 1601, 1496, 1373, 1243, 754 cm<sup>-1</sup>.

HRMS (ESI-MS) *m/z* [M+Na]<sup>+</sup> calcd for C<sub>20</sub>H<sub>32</sub>NaO<sub>3</sub>: 343.2244, found: 343.2245.

[α]<sub>D</sub><sup>23</sup> = +1.5 (*c* 1.0, CHCl<sub>3</sub>); 93% ee, from (*S,S*)-L\*.

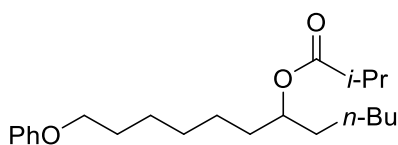

**12-Phenoxydodecan-6-yl isobutyrate (Figure 3, entry 16).** The title compound was synthesized according to **GP-4** from 1-bromohexyl isobutyrate and (hex-5-en-1-yloxy)benzene. The product was purified by column chromatography on silica gel (1:25 Et<sub>2</sub>O/hexanes). Colorless oil.

(*S,S*)-**L**\*: 166 mg, 60% yield, 94% ee; (*R,R*)-**L**\*: 170 mg, 61% yield, 95% ee.

HPLC analysis: The ee was determined via HPLC on a CHIRALPAK AD column (0.5% *i*-PrOH in hexane, 1.0 mL/min); retention times for compound obtained using (*S,S*)-**L**\*: 8.5 min (major), 10.0 min (minor).

<sup>1</sup>H NMR (400 MHz, CDCl<sub>3</sub>) δ 7.35 – 7.22 (m, 2H), 7.00 – 6.82 (m, 3H), 4.93 – 4.81 (m, 1H), 3.94 (t, *J* = 6.5 Hz, 2H), 2.52 (hept, *J* = 7.0 Hz, 1H), 1.86 – 1.72 (m, 2H), 1.57 – 1.41 (m, 6H), 1.39 – 1.23 (m, 10H), 1.16 (d, *J* = 7.0 Hz, 6H), 0.92 – 0.84 (m, 3H).

<sup>13</sup>C NMR (101 MHz, CDCl<sub>3</sub>) δ 177.1, 159.2, 129.5, 120.6, 114.6, 73.9, 67.9, 34.4, 34.24, 34.22, 31.8, 29.4, 29.3, 26.1, 25.4, 25.1, 22.7, 19.3, 14.1.

FT-IR (film): 2934, 1732, 1601, 1497, 1387, 1245, 751 cm<sup>-1</sup>.

HRMS (ESI-MS) *m/z* [M+NH<sub>4</sub>]<sup>+</sup> calcd for C<sub>22</sub>H<sub>40</sub>NO<sub>3</sub>: 366.3003, found: 366.3003.

[α]<sub>D</sub><sup>23</sup> = +0.5 (*c* 1.0, CHCl<sub>3</sub>); 94% ee, from (*S,S*)-**L**\*.

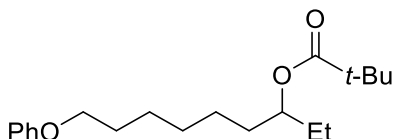

**9-Phenoxynonan-3-yl pivalate (Figure 3, entry 17).** The title compound was synthesized according to **GP-4** from 1-bromopropyl pivalate and (hex-5-en-1-yloxy)benzene. The product was purified by column chromatography on silica gel (1:9 Et<sub>2</sub>O/hexanes). Colorless oil.

(*S,S*)-**L**\*: 106 mg, 41% yield, 91% ee; (*R,R*)-**L**\*: 105 mg, 41% yield, 92% ee.

HPLC analysis: The ee was determined via HPLC on a CHIRALPAK AD column (0.5% *i*-PrOH in hexane, 0.5 mL/min); retention times for compound obtained using (*S,S*)-**L**\*: 11.7 min (major), 13.0 min (minor).

<sup>1</sup>H NMR (400 MHz, CDCl<sub>3</sub>) δ 7.38 – 7.17 (m, 2H), 7.03 – 6.82 (m, 3H), 4.89 – 4.72 (m, 1H), 3.94 (t, *J* = 6.5 Hz, 2H), 1.83 – 1.72 (m, 2H), 1.63 – 1.49 (m, 4H), 1.49 – 1.28 (m, 6H), 1.20 (s, 9H), 0.88 (t, *J* = 7.4 Hz, 3H).

<sup>13</sup>C NMR (101 MHz, CDCl<sub>3</sub>) δ 178.5, 159.2, 129.5, 120.6, 114.6, 75.0, 67.9, 39.0, 33.7, 29.4, 29.3, 27.4, 27.1, 26.1, 25.3, 9.7.

FT-IR (film): 2942, 1731, 1601, 1498, 1396, 1244, 754 cm<sup>-1</sup>.

HRMS (ESI-MS) *m/z* [M+NH<sub>4</sub>]<sup>+</sup> calcd for C<sub>20</sub>H<sub>36</sub>NO<sub>3</sub>: 338.2690, found: 338.2696.

[α]<sub>D</sub><sup>23</sup> = +3.1 (*c* 1.0, CHCl<sub>3</sub>); 91% ee, from (*S,S*)-**L**\*.

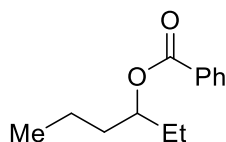

**Hexan-3-yl benzoate (Figure 3, entry 18).** In the air, NiBr<sub>2</sub>-diglyme (28.2 mg, 0.081 mmol, 0.10 equiv), (*S,S*)-L\* (61.2 mg, 0.096 mmol, 0.12 equiv), and K<sub>3</sub>PO<sub>4</sub>·H<sub>2</sub>O (552 mg, 2.4 mmol, 3.0 equiv) were added to an oven-dried 25 mL side-armed Schlenk tube equipped with a stir bar. The tube was closed with two rubber septa, and it was placed under a nitrogen atmosphere by evacuating and backfilling the tube (three cycles). Anhydrous MTBE (8.0 mL) was added to the tube, and the mixture was stirred at room temperature for 30 min, at which time it was a pink heterogeneous solution. A balloon filled with nitrogen was attached to the side arm. Then 1-bromopropyl benzoate (194 mg, 0.80 mmol, 1.0 equiv) and triethoxysilane (440 μL, 2.4 mmol, 3.0 equiv) were added dropwise in turn to the reaction mixture. The top rubber septum was switched quickly to a Chem-Cap® valve, and the balloon attached to the side arm was removed. The side arm of the Schlenk tube was attached to a vacuum manifold. The solution was frozen in liquid nitrogen, and the tube was placed under vacuum. The flask was sealed under vacuum and separated from the vacuum manifold. Next, a balloon filled with propylene was attached to the side arm. The gas in the balloon was condensed into the Schlenk tube at 77 K (~1.0 mL), and the flask was resealed. The balloon was removed, and the mixture was stirred vigorously (1100 rpm) at room temperature for 20 h.

**Work-up:** Same as **GP-2**. The product was purified by column chromatography on silica gel (1:40 Et<sub>2</sub>O/hexanes). Colorless oil.

(*S,S*)-L\*: 139 mg, 84% yield, 89% ee; (*R,R*)-L\*: 130 mg, 79% yield, 87% ee.

HPLC analysis: The ee was determined after transforming the product to the corresponding phosphate.

<sup>1</sup>H NMR (400 MHz, CDCl<sub>3</sub>) δ 8.11 – 7.99 (m, 2H), 7.62 – 7.50 (m, 1H), 7.49 – 7.33 (m, 2H), 5.18 – 5.02 (m, 1H), 1.76 – 1.55 (m, 4H), 1.49 – 1.32 (m, 2H), 0.95 (t, *J* = 7.2 Hz, 3H), 0.93 (t, *J* = 7.2 Hz, 3H).

<sup>13</sup>C NMR (101 MHz, CDCl<sub>3</sub>) δ 166.6, 132.8, 131.0, 129.7, 128.4, 76.1, 36.0, 27.3, 18.8, 14.2, 9.8.

FT-IR (film): 2966, 1717, 1452, 1272, 1107, 712 cm<sup>-1</sup>.

GC-MS (EI) *m/z* [M]<sup>+</sup> calcd for C<sub>13</sub>H<sub>18</sub>O<sub>2</sub>: 206.1, found: 206.2.

[α]<sub>D</sub><sup>23</sup> = -4.8 (*c* 1.0, CHCl<sub>3</sub>); 89% ee, from (*S,S*)-L\*.



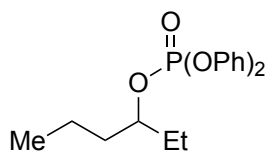

**Hexan-3-yl diphenyl phosphate.** The title compound was synthesized according to **GP-5**. The product was purified by column chromatography on silica gel (1:5 EtOAc/hexanes).

Colorless oil.

(*S,S*)-**L\***: 33.8 mg, 51% yield, 89% ee; (*R,R*)-**L\***: 33.4 mg, 50% yield, 87% ee.

HPLC analysis: The ee was determined via HPLC on a CHIRALPAK AD column (10% *i*-PrOH in hexane, 1.0 mL/min); retention times for compound obtained using (*S,S*)-**L\***: 10.0 min (major), 11.9 min (minor).

$^1\text{H}$  NMR (400 MHz,  $\text{CDCl}_3$ )  $\delta$  7.37 – 7.29 (m, 4H), 7.25 – 7.20 (m, 4H), 7.20 – 7.14 (m, 2H), 4.69 – 4.52 (m, 1H), 1.78 – 1.51 (m, 4H), 1.46 – 1.27 (m, 2H), 0.91 (t,  $J = 7.6$  Hz, 3H), 0.88 (t,  $J = 7.6$  Hz, 3H).

$^{13}\text{C}$  NMR (101 MHz,  $\text{CDCl}_3$ )  $\delta$  150.9 (d,  $J = 7.1$  Hz), 129.8, 125.2 (d,  $J = 1.0$  Hz), 120.3 (d,  $J = 2.0$  Hz), 120.2 (d,  $J = 2.0$  Hz), 83.3 (d,  $J = 7.1$  Hz), 36.6 (d,  $J = 5.1$  Hz), 27.9 (d,  $J = 4.0$  Hz), 18.2, 14.0, 9.2.

$^{31}\text{P}$  NMR (162 MHz,  $\text{CDCl}_3$ )  $\delta$  -12.3.

FT-IR (film): 2964, 2366, 1591, 1489, 1292, 1194, 1016, 772  $\text{cm}^{-1}$ .

HRMS (ESI-MS)  $m/z$   $[\text{M}+\text{NH}_4]^+$  calcd for  $\text{C}_{18}\text{H}_{27}\text{NO}_4\text{P}$ : 352.1672, found: 352.1680.

$[\alpha]_D^{25} = -5.0$  ( $c$  1.0,  $\text{CHCl}_3$ ); 89% ee, from (*S,S*)-**L\***.

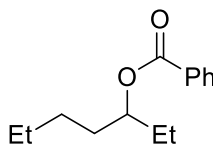

**Heptan-3-yl benzoate (Figure 3, entry 19).** A solution of the catalyst was prepared according to **GP-2**. After a balloon filled with nitrogen was attached to the reaction vial, 1-bromopropyl benzoate (194 mg, 0.80 mmol, 1.0 equiv), a solution of 1-butene in toluene (10 wt.%, 2.24 g, 4.0 mmol, 5.0 equiv), and triethoxysilane (440  $\mu\text{L}$ , 2.4 mmol, 3.0 equiv) were added dropwise in turn to the reaction mixture. The balloon was removed, and the septum cap was sealed with vacuum grease. The mixture was stirred vigorously (1100 rpm) at room temperature for 20 h.

**Work-up:** Same as **GP-2**. The product was purified by column chromatography on silica gel (1:40  $\text{Et}_2\text{O}$ /hexanes). Colorless oil.

(*S,S*)-**L\***: 146 mg, 83% yield, 91% ee; (*R,R*)-**L\***: 150 mg, 85% yield, 90% ee.

HPLC analysis: The ee was determined after transforming the product to the corresponding phosphate.

$^1\text{H}$  NMR (400 MHz,  $\text{CDCl}_3$ )  $\delta$  8.09 – 8.02 (m, 2H), 7.58 – 7.52 (m, 1H), 7.47 – 7.40 (m, 2H), 5.08 (tt,  $J = 7.4, 5.6$  Hz, 1H), 1.77 – 1.61 (m, 4H), 1.42 – 1.28 (m, 4H), 0.95 (t,  $J = 7.5$  Hz, 3H), 0.92 – 0.84 (m, 3H).

$^{13}\text{C}$  NMR (101 MHz,  $\text{CDCl}_3$ )  $\delta$  166.6, 132.8, 131.0, 129.7, 128.4, 76.3, 33.5, 27.7, 27.2, 22.8, 14.2, 9.8.

FT-IR (film): 2962, 1716, 1452, 1274, 1110, 711  $\text{cm}^{-1}$ .

GC-MS (EI)  $m/z$   $[\text{M}]^+$  calcd for  $\text{C}_{14}\text{H}_{20}\text{O}_2$ : 220.1, found: 220.2.

$[\alpha]^{23}_{\text{D}} = -7.2$  ( $c$  1.0,  $\text{CHCl}_3$ ); 91% ee, from (*S,S*)-**L\***.

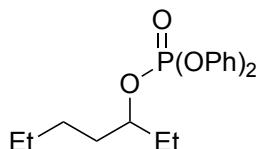

**Heptan-3-yl diphenyl phosphate.** The title compound was synthesized according to **GP-5**. The product was purified by column chromatography on silica gel (1:5 EtOAc/hexanes). Colorless oil.

(*S,S*)-**L\***: 48.4 mg, 70% yield, 91% ee; (*R,R*)-**L\***: 49.2 mg, 71% yield, 90% ee.

HPLC analysis: The ee was determined via HPLC on a CHIRALPAK AD column (10% *i*-PrOH in hexane, 1.0 mL/min); retention times for compound obtained using (*S,S*)-**L\***: 9.5 min (major), 12.8 min (minor).

$^1\text{H}$  NMR (400 MHz,  $\text{CDCl}_3$ )  $\delta$  7.37 – 7.28 (m, 4H), 7.26 – 7.20 (m, 4H), 7.20 – 7.13 (m, 2H), 4.71 – 4.45 (m, 1H), 1.74 – 1.55 (m, 4H), 1.37 – 1.19 (m, 4H), 0.91 (t,  $J = 7.5$  Hz, 3H), 0.87 – 0.81 (m, 3H).

$^{13}\text{C}$  NMR (101 MHz,  $\text{CDCl}_3$ )  $\delta$  150.9 (d,  $J = 7.1$  Hz), 129.8, 125.2, 120.3 (d,  $J = 2.0$  Hz), 120.2 (d,  $J = 1.0$  Hz), 83.5 (d,  $J = 6.1$  Hz), 34.2 (d,  $J = 5.1$  Hz), 27.9 (d,  $J = 4.0$  Hz), 27.0, 22.6, 14.0, 9.2.

$^{31}\text{P}$  NMR (162 MHz,  $\text{CDCl}_3$ )  $\delta$  -12.3.

FT-IR (film): 2955, 2361, 1593, 1488, 1292, 1199, 1014, 751  $\text{cm}^{-1}$ .

HRMS (ESI-MS)  $m/z$   $[\text{M}+\text{NH}_4]^+$  calcd for  $\text{C}_{19}\text{H}_{29}\text{NO}_4\text{P}$ : 366.1829, found: 366.1836.

$[\alpha]^{23}_{\text{D}} = -3.6$  ( $c$  1.0,  $\text{CHCl}_3$ ); 91% ee, from (*S,S*)-**L\***.

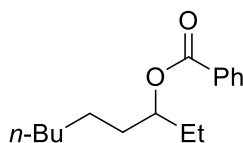

**Nonan-3-yl benzoate (Figure 3, entry 20).** The title compound was synthesized according to **GP-2** from 1-bromopropyl benzoate and 1-hexene. The product was purified by column chromatography on silica gel (1:40 Et<sub>2</sub>O/hexanes). Colorless oil.

(*S,S*)-**L\***: 140 mg, 70% yield, 89% ee; (*R,R*)-**L\***: 135 mg, 68% yield, 89% ee.

HPLC analysis: The ee was determined after transforming the product to the corresponding phosphate.

$^1\text{H}$  NMR (400 MHz,  $\text{CDCl}_3$ )  $\delta$  8.09 – 8.03 (m, 2H), 7.58 – 7.51 (m, 1H), 7.48 – 7.40 (m, 2H), 5.18 – 4.99 (m, 1H), 1.77 – 1.62 (m, 4H), 1.44 – 1.19 (m, 8H), 0.95 (t,  $J = 7.5$  Hz, 3H), 0.91 – 0.81 (m, 3H).

$^{13}\text{C}$  NMR (101 MHz,  $\text{CDCl}_3$ )  $\delta$  166.6, 132.8, 131.0, 129.7, 128.4, 76.3, 33.8, 31.9, 29.4, 27.2, 25.5, 22.7, 14.2, 9.8.

FT-IR (film): 2931, 1716, 1603, 1452, 1272, 1109, 712  $\text{cm}^{-1}$ .

HRMS (ESI-MS)  $m/z$   $[\text{M}+\text{NH}_4]^+$  calcd for  $\text{C}_{16}\text{H}_{28}\text{NO}_2$ : 266.2115, found: 266.2117.

$[\alpha]^{23}_{\text{D}} = -8.9$  ( $c$  1.0,  $\text{CHCl}_3$ ); 89% ee, from (*S,S*)-**L\***.

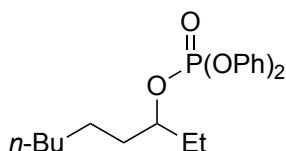

**Nonan-3-yl diphenyl phosphate.** The title compound was synthesized according to **GP-5**. The product was purified by column chromatography on silica gel (1:5 EtOAc/hexanes). Colorless oil.

(*S,S*)-**L\***: 56.5 mg, 75% yield, 89% ee; (*R,R*)-**L\***: 52.9 mg, 70% yield, 89% ee.

HPLC analysis: The ee was determined via HPLC on a CHIRALPAK AD column (10% *i*-PrOH in hexane, 1.0 mL/min); retention times for compound obtained using (*S,S*)-**L\***: 8.6 min (major), 11.6 min (minor).

$^1\text{H}$  NMR (400 MHz,  $\text{CDCl}_3$ )  $\delta$  7.36 – 7.29 (m, 4H), 7.26 – 7.20 (m, 4H), 7.20 – 7.13 (m, 2H), 4.68 – 4.50 (m, 1H), 1.76 – 1.54 (m, 4H), 1.38 – 1.14 (m, 8H), 0.91 (t,  $J = 7.4$  Hz, 3H), 0.86 (t,  $J = 6.9$  Hz, 3H).

$^{13}\text{C}$  NMR (101 MHz,  $\text{CDCl}_3$ )  $\delta$  150.9 (d,  $J = 7.1$  Hz), 129.8, 125.2 (d,  $J = 1.0$  Hz), 120.2 (d,  $J = 5.1$  Hz), 83.5 (d,  $J = 6.1$  Hz), 34.5 (d,  $J = 5.1$  Hz), 31.8, 29.2, 27.9 (d,  $J = 4.0$  Hz), 24.8, 22.6, 14.2, 9.2.

$^{31}\text{P}$  NMR (162 MHz,  $\text{CDCl}_3$ )  $\delta$  -12.3.

FT-IR (film): 2936, 1594, 1495, 1294, 1202, 1012, 764  $\text{cm}^{-1}$ .

HRMS (ESI-MS)  $m/z$   $[\text{M}+\text{NH}_4]^+$  calcd for  $\text{C}_{21}\text{H}_{33}\text{NO}_4\text{P}$ : 394.2142, found: 394.2147.

$[\alpha]^{23}_{\text{D}} = -3.3$  ( $c$  1.0,  $\text{CHCl}_3$ ); 89% ee, from (*S,S*)-**L\***.

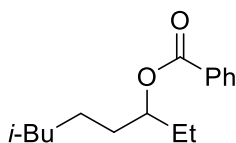

**7-Methyloctan-3-yl benzoate (Figure 3, entry 21).** The title compound was synthesized according to **GP-2** from 1-bromopropyl benzoate and 4-methylpent-1-ene. The product was purified by column chromatography on silica gel (1:40 Et<sub>2</sub>O/hexanes). Colorless oil.

(*S,S*)-**L\***: 158 mg, 80% yield, 90% ee; (*R,R*)-**L\***: 149 mg, 75% yield, 91% ee.

HPLC analysis: The ee was determined after transforming the product to the corresponding phosphate.

$^1\text{H}$  NMR (400 MHz,  $\text{CDCl}_3$ )  $\delta$  8.09 – 8.03 (m, 2H), 7.59 – 7.52 (m, 1H), 7.48 – 7.41 (m, 2H), 5.16 – 5.01 (m, 1H), 1.76 – 1.58 (m, 4H), 1.58 – 1.46 (m, 1H), 1.44 – 1.29 (m, 2H), 1.26 – 1.13 (m, 2H), 0.95 (t,  $J = 7.5$  Hz, 3H), 0.85 (d,  $J = 6.6$  Hz, 6H).

$^{13}\text{C}$  NMR (101 MHz,  $\text{CDCl}_3$ )  $\delta$  166.5, 132.8, 131.0, 129.7, 128.4, 76.3, 39.0, 34.0, 27.9, 27.2, 23.3, 22.72, 22.65, 9.8.

FT-IR (film): 2953, 1716, 1603, 1453, 1274, 1111, 711  $\text{cm}^{-1}$ .

HRMS (ESI-MS)  $m/z$   $[\text{M}+\text{Na}]^+$  calcd for  $\text{C}_{16}\text{H}_{24}\text{NaO}_2$ : 271.1669, found: 271.1673.

$[\alpha]^{23}_{\text{D}} = -10.6$  ( $c$  1.0,  $\text{CHCl}_3$ ); 90% ee, from (*S,S*)-**L\***.

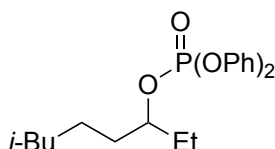

**7-Methyloctan-3-yl diphenyl phosphate.** The title compound was synthesized according to **GP-5**. The product was purified by column chromatography on silica gel (1:5 EtOAc/hexanes). Colorless oil.

(*S,S*)-**L\***: 44.4 mg, 59% yield, 90% ee; (*R,R*)-**L\***: 45.9 mg, 61% yield, 91% ee.

HPLC analysis: The ee was determined via HPLC on a CHIRALPAK AD column (10% *i*-PrOH in hexane, 1.0 mL/min); retention times for compound obtained using (*S,S*)-**L\***: 9.0 min (major), 12.2 min (minor).

$^1\text{H}$  NMR (400 MHz,  $\text{CDCl}_3$ )  $\delta$  7.36 – 7.29 (m, 4H), 7.26 – 7.20 (m, 4H), 7.20 – 7.14 (m, 2H), 4.67 – 4.53 (m, 1H), 1.77 – 1.52 (m, 4H), 1.51 – 1.40 (m, 1H), 1.39 – 1.20 (m, 2H), 1.19 – 1.04 (m, 2H), 0.91 (t,  $J = 7.4$  Hz, 3H), 0.83 (d,  $J = 6.6$  Hz, 6H).

$^{13}\text{C}$  NMR (101 MHz,  $\text{CDCl}_3$ )  $\delta$  150.9 (d,  $J = 8.1$  Hz), 129.8, 125.2 (d,  $J = 1.0$  Hz), 120.23 (d,  $J = 2.0$  Hz), 120.19 (d,  $J = 2.0$  Hz), 83.5 (d,  $J = 7.1$  Hz), 38.8, 34.7 (d,  $J = 5.1$  Hz), 28.0, 27.94, 27.91, 22.7, 22.6 (d,  $J = 2.0$  Hz), 9.2.

$^{31}\text{P}$  NMR (162 MHz,  $\text{CDCl}_3$ )  $\delta$  -12.3.

FT-IR (film): 2956, 1593, 1488, 1290, 1199, 1012, 764  $\text{cm}^{-1}$ .

HRMS (ESI-MS)  $m/z$   $[\text{M}+\text{NH}_4]^+$  calcd for  $\text{C}_{21}\text{H}_{33}\text{NO}_4\text{P}$ : 394.2142, found: 394.2143.

$[\alpha]^{23}_{\text{D}} = -3.5$  ( $c$  1.0,  $\text{CHCl}_3$ ); 90% ee, from (*S,S*)-**L\***.

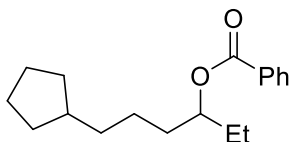

**6-Cyclopentylhexan-3-yl benzoate (Figure 3, entry 22).** The title compound was synthesized according to **GP-2** from 1-bromopropyl benzoate and allylcyclopentane. The product was purified by column chromatography on silica gel (1:40 Et<sub>2</sub>O/hexanes). Colorless oil.

(*S,S*)-**L\***: 159 mg, 72% yield, 88% ee; (*R,R*)-**L\***: 165 mg, 75% yield, 89% ee.

HPLC analysis: The ee was determined via HPLC on a CHIRALPAK IC column (0.5% *i*-PrOH in hexane, 0.5 mL/min); retention times for compound obtained using (*S,S*)-**L\***: 11.0 min (major), 11.9 min (minor).

$^1\text{H}$  NMR (400 MHz,  $\text{CDCl}_3$ )  $\delta$  8.12 – 8.00 (m, 2H), 7.58 – 7.52 (m, 1H), 7.47 – 7.40 (m, 2H), 5.19 – 5.00 (m, 1H), 1.76 – 1.27 (m, 15H), 1.12 – 0.98 (m, 2H), 0.95 (t,  $J = 7.4$  Hz, 3H).

$^{13}\text{C}$  NMR (101 MHz,  $\text{CDCl}_3$ )  $\delta$  166.6, 132.8, 131.0, 129.7, 128.4, 76.3, 40.1, 36.2, 34.1, 32.81, 32.76, 27.2, 25.3, 24.7, 9.8.

FT-IR (film): 2948, 1716, 1451, 1270, 1110, 710  $\text{cm}^{-1}$ .

HRMS (ESI-MS)  $m/z$   $[\text{M}+\text{NH}_4]^+$  calcd for  $\text{C}_{18}\text{H}_{30}\text{NO}_2$ : 292.2271, found: 292.2274.

$[\alpha]^{23}_{\text{D}} = -10.6$  ( $c$  1.0,  $\text{CHCl}_3$ ); 88% ee, from (*S,S*)-**L\***.

The title compound was also synthesized according to **GP-2**, using 2.0 equiv of the olefin: (*S,S*)-**L\***: 160 mg, 73% yield, 89% ee; (*R,R*)-**L\***: 158 mg, 72% yield, 90% ee.

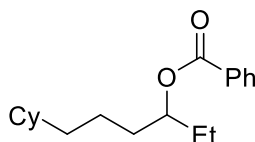

**6-Cyclohexylhexan-3-yl benzoate (Figure 3, entry 23).** The title compound was synthesized according to **GP-2** from 1-bromopropyl benzoate and allylcyclohexane. The product was purified by column chromatography on silica gel (1:40  $\text{Et}_2\text{O}$ /hexanes). Colorless oil.

(*S,S*)-**L\***: 174 mg, 76% yield, 90% ee; (*R,R*)-**L\***: 176 mg, 76% yield, 90% ee.

HPLC analysis: The ee was determined after transforming the product to the corresponding phosphate.

$^1\text{H}$  NMR (400 MHz,  $\text{CDCl}_3$ )  $\delta$  8.10 – 8.02 (m, 2H), 7.59 – 7.52 (m, 1H), 7.49 – 7.40 (m, 2H), 5.17 – 4.99 (m, 1H), 1.77 – 1.54 (m, 9H), 1.46 – 1.28 (m, 2H), 1.27 – 1.05 (m, 6H), 0.95 (t,  $J = 7.5$  Hz, 3H), 0.90 – 0.75 (m, 2H).

$^{13}\text{C}$  NMR (101 MHz,  $\text{CDCl}_3$ )  $\delta$  166.6, 132.8, 131.0, 129.7, 128.4, 76.4, 37.6, 37.5, 34.1, 33.5, 33.4, 27.2, 26.8, 26.53, 26.52, 22.8, 9.8.

FT-IR (film): 2926, 1716, 1451, 1273, 1116, 712  $\text{cm}^{-1}$ .

HRMS (ESI-MS)  $m/z$   $[\text{M}+\text{NH}_4]^+$  calcd for  $\text{C}_{19}\text{H}_{32}\text{NO}_2$ : 306.2428, found: 306.2431.

$[\alpha]^{23}_{\text{D}} = -12.1$  ( $c$  1.0,  $\text{CHCl}_3$ ); 90% ee, from (*S,S*)-**L\***.

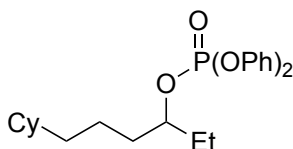

**6-Cyclohexylhexan-3-yl diphenyl phosphate.** The title compound was synthesized according to **GP-5**. The product was purified by column chromatography on silica gel (1:5  $\text{EtOAc}$ /hexanes). Colorless oil.

(*S,S*)-**L\***: 81.4 mg, 98% yield, 90% ee; (*R,R*)-**L\***: 81.5 mg, 98% yield, 90% ee.

HPLC analysis: The ee was determined via HPLC on a CHIRALPAK AD column (10% *i*-PrOH in hexane, 1.0 mL/min); retention times for compound obtained using (*S,S*)-L\*: 8.6 min (major), 10.2 min (minor).

<sup>1</sup>H NMR (400 MHz, CDCl<sub>3</sub>) δ 7.36 – 7.28 (m, 4H), 7.27 – 7.20 (m, 4H), 7.20 – 7.10 (m, 2H), 4.68 – 4.50 (m, 1H), 1.75 – 1.50 (m, 9H), 1.40 – 1.02 (m, 8H), 0.91 (t, *J* = 7.5 Hz, 3H), 0.87 – 0.70 (m, 2H).

<sup>13</sup>C NMR (101 MHz, CDCl<sub>3</sub>) δ 150.9 (d, *J* = 7.1 Hz), 129.7, 125.2, 120.2 (d, *J* = 5.1 Hz), 83.5 (d, *J* = 6.1 Hz), 37.6, 37.3, 34.7 (d, *J* = 5.1 Hz), 33.38, 33.35, 28.0, 27.9, 26.8, 26.5, 22.2, 9.2.

<sup>31</sup>P NMR (162 MHz, CDCl<sub>3</sub>) δ -12.3.

FT-IR (film): 2920, 1596, 1488, 1286, 1195, 1022, 756 cm<sup>-1</sup>.

HRMS (ESI-MS) *m/z* [M+NH<sub>4</sub>]<sup>+</sup> calcd for C<sub>24</sub>H<sub>37</sub>NO<sub>4</sub>P: 434.2455, found: 434.2458.

[α]<sub>D</sub><sup>23</sup> = -3.9 (*c* 1.0, CHCl<sub>3</sub>); 90% ee, from (*S,S*)-L\*.

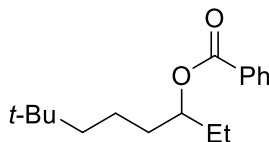

**7,7-Dimethyloctan-3-yl benzoate (Figure 3, entry 24).** The title compound was synthesized according to **GP-2** from 1-bromopropyl benzoate and 4,4-dimethylpent-1-ene. The product was purified by column chromatography on silica gel (1:40 Et<sub>2</sub>O/hexanes). Colorless oil.

(*S,S*)-L\*: 165 mg, 79% yield, 88% ee; (*R,R*)-L\*: 162 mg, 77% yield, 89% ee.

HPLC analysis: The ee was determined via HPLC on a CHIRALPAK AD column (0.5% *i*-PrOH in hexane, 0.5 mL/min); retention times for compound obtained using (*S,S*)-L\*: 10.3 min (minor), 11.1 min (major).

<sup>1</sup>H NMR (400 MHz, CDCl<sub>3</sub>) δ 8.11 – 7.99 (m, 2H), 7.60 – 7.51 (m, 1H), 7.50 – 7.38 (m, 2H), 5.16 – 5.02 (m, 1H), 1.78 – 1.53 (m, 4H), 1.42 – 1.12 (m, 4H), 0.95 (t, *J* = 7.4 Hz, 3H), 0.84 (s, 9H).

<sup>13</sup>C NMR (101 MHz, CDCl<sub>3</sub>) δ 166.6, 132.8, 131.0, 129.7, 128.4, 76.3, 44.2, 34.7, 30.4, 29.5, 27.2, 20.5, 9.8.

FT-IR (film): 2948, 1716, 1452, 1272, 1113, 711 cm<sup>-1</sup>.

HRMS (ESI-MS) *m/z* [M+NH<sub>4</sub>]<sup>+</sup> calcd for C<sub>17</sub>H<sub>30</sub>NO<sub>2</sub>: 280.2271, found: 280.2267.

[α]<sub>D</sub><sup>23</sup> = -10.8 (*c* 1.0, CHCl<sub>3</sub>); 88% ee, from (*S,S*)-L\*.

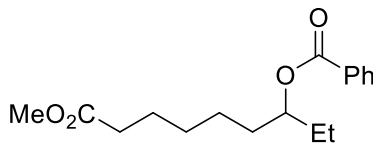

**9-Methoxy-9-oxononan-3-yl benzoate (Figure 3, entry 25).** The title compound was synthesized according to **GP-2** from 1-bromopropyl benzoate and methyl hex-5-enoate. The

product was purified by column chromatography on silica gel (1:4 Et<sub>2</sub>O/hexanes). Colorless oil.

(*S,S*)-**L**\*: 146 mg, 62% yield, 86% ee; (*R,R*)-**L**\*: 148 mg, 63% yield, 88% ee.

HPLC analysis: The ee was determined via HPLC on a CHIRALPAK AD column (1% *i*-PrOH in hexane, 1.0 mL/min); retention times for compound obtained using (*S,S*)-**L**\*: 8.6 min (major), 9.3 min (minor).

<sup>1</sup>H NMR (400 MHz, CDCl<sub>3</sub>) δ 8.13 – 7.99 (m, 2H), 7.63 – 7.50 (m, 1H), 7.49 – 7.35 (m, 2H), 5.15 – 5.00 (m, 1H), 3.64 (s, 3H), 2.29 (t, *J* = 7.5 Hz, 2H), 1.75 – 1.55 (m, 6H), 1.46 – 1.29 (m, 4H), 0.94 (t, *J* = 7.5 Hz, 3H).

<sup>13</sup>C NMR (101 MHz, CDCl<sub>3</sub>) δ 174.3, 166.5, 132.9, 130.9, 129.7, 128.4, 76.1, 51.6, 34.1, 33.6, 29.2, 27.2, 25.2, 24.9, 9.8.

FT-IR (film): 2940, 1715, 1456, 1274, 1112, 715 cm<sup>-1</sup>.

HRMS (ESI-MS) *m/z* [M+NH<sub>4</sub>]<sup>+</sup> calcd for C<sub>17</sub>H<sub>28</sub>NO<sub>4</sub>: 310.2013, found: 310.2016.

[α]<sub>D</sub><sup>23</sup> = -8.7 (*c* 1.0, CHCl<sub>3</sub>); 86% ee, from (*S,S*)-**L**\*.

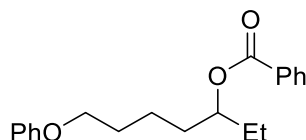

**7-Phenoxyheptan-3-yl benzoate (Figure 3, entry 26).** The title compound was synthesized according to **GP-2** from 1-bromopropyl benzoate and (but-3-en-1-yloxy)benzene. The product was purified by column chromatography on silica gel (1:10 Et<sub>2</sub>O/hexanes). Colorless oil.

(*S,S*)-**L**\*: 171 mg, 69% yield, 89% ee; (*R,R*)-**L**\*: 179 mg, 72% yield, 90% ee.

HPLC analysis: The ee was determined via HPLC on a CHIRALPAK AD column (1% *i*-PrOH in hexane, 0.5 mL/min); retention times for compound obtained using (*S,S*)-**L**\*: 7.0 min (major), 7.8 min (minor).

<sup>1</sup>H NMR (400 MHz, CDCl<sub>3</sub>) δ 8.16 – 8.01 (m, 2H), 7.60 – 7.53 (m, 1H), 7.49 – 7.42 (m, 2H), 7.31 – 7.23 (m, 2H), 6.97 – 6.90 (m, 1H), 6.89 – 6.83 (m, 2H), 5.20 – 5.06 (m, 1H), 3.95 (t, *J* = 6.4 Hz, 2H), 1.93 – 1.67 (m, 6H), 1.66 – 1.47 (m, 2H), 0.97 (t, *J* = 7.5 Hz, 3H).

<sup>13</sup>C NMR (101 MHz, CDCl<sub>3</sub>) δ 166.5, 159.1, 132.9, 130.9, 129.7, 129.5, 128.5, 120.6, 114.6, 76.0, 67.6, 33.6, 29.3, 27.2, 22.1, 9.8.

FT-IR (film): 2948, 1715, 1601, 1495, 1272, 1110, 710 cm<sup>-1</sup>.

HRMS (ESI-MS) *m/z* [M+Na]<sup>+</sup> calcd for C<sub>20</sub>H<sub>24</sub>NaO<sub>3</sub>: 335.1618, found: 335.1621.

[α]<sub>D</sub><sup>23</sup> = -11.5 (*c* 1.0, CHCl<sub>3</sub>); 89% ee, from (*S,S*)-**L**\*.

The title compound was also synthesized according to **GP-2**, using 2.0 equiv of the olefin: (*S,S*)-**L**\*: 159 mg, 64% yield, 89% ee; (*R,R*)-**L**\*: 163 mg, 65% yield, 90% ee.

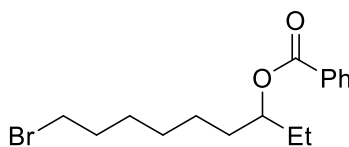

**9-Bromononan-3-yl benzoate (Figure 3, entry 27).** The title compound was synthesized according to **GP-2** from 1-bromopropyl benzoate and 6-bromohex-1-ene. The product was purified by column chromatography on silica gel (1:40 Et<sub>2</sub>O/hexanes). Colorless oil.

(*S,S*)-**L\***: 165 mg, 63% yield, 92% ee; (*R,R*)-**L\***: 171 mg, 66% yield, 90% ee.

HPLC analysis: The ee was determined via HPLC on a CHIRALPAK AD column (0.5% *i*-PrOH in hexane, 1.0 mL/min); retention times for compound obtained using (*S,S*)-**L\***: 8.2 min (major), 9.5 min (minor).

<sup>1</sup>H NMR (400 MHz, CDCl<sub>3</sub>) δ 8.12 – 7.99 (m, 2H), 7.62 – 7.50 (m, 1H), 7.50 – 7.38 (m, 2H), 5.14 – 5.01 (m, 1H), 3.38 (t, *J* = 6.8 Hz, 2H), 1.89 – 1.79 (m, 2H), 1.75 – 1.62 (m, 4H), 1.48 – 1.30 (m, 6H), 0.95 (t, *J* = 7.4 Hz, 3H).

<sup>13</sup>C NMR (101 MHz, CDCl<sub>3</sub>) δ 166.5, 132.9, 130.9, 129.7, 128.5, 76.1, 34.1, 33.7, 32.8, 28.8, 28.2, 27.2, 25.3, 9.8.

FT-IR (film): 2933, 2358, 1714, 1602, 1451, 1277, 1112, 710 cm<sup>-1</sup>.

HRMS (ESI-MS) *m/z* [M+NH<sub>4</sub>]<sup>+</sup> calcd for C<sub>16</sub>H<sub>27</sub>BrNO<sub>2</sub>: 344.1220, found: 344.1227.

[α]<sub>D</sub><sup>23</sup> = -8.0 (*c* 1.0, CHCl<sub>3</sub>); 92% ee, from (*S,S*)-**L\***.

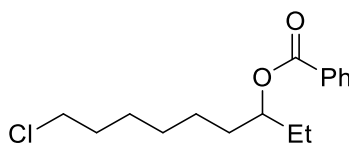

**9-Chlorononan-3-yl benzoate (Figure 3, entry 28).** The title compound was synthesized according to **GP-2** from 1-bromopropyl benzoate and 6-chlorohex-1-ene. The product was purified by column chromatography on silica gel (1:40 Et<sub>2</sub>O/hexanes). Colorless oil.

(*S,S*)-**L\***: 157 mg, 70% yield, 88% ee; (*R,R*)-**L\***: 147 mg, 65% yield, 87% ee.

HPLC analysis: The ee was determined via HPLC on a CHIRALPAK AD column (1% *i*-PrOH in hexane, 1.0 mL/min); retention times for compound obtained using (*S,S*)-**L\***: 5.8 min (major), 6.4 min (minor).

<sup>1</sup>H NMR (400 MHz, CDCl<sub>3</sub>) δ 8.13 – 8.00 (m, 2H), 7.62 – 7.51 (m, 1H), 7.50 – 7.38 (m, 2H), 5.16 – 5.01 (m, 1H), 3.51 (t, *J* = 6.7 Hz, 2H), 1.80 – 1.62 (m, 6H), 1.48 – 1.30 (m, 6H), 0.95 (t, *J* = 7.5 Hz, 3H).

<sup>13</sup>C NMR (101 MHz, CDCl<sub>3</sub>) δ 166.6, 132.9, 130.9, 129.7, 128.5, 76.2, 45.2, 33.7, 32.7, 28.9, 27.3, 26.9, 25.4, 9.8.

FT-IR (film): 2934, 2358, 1715, 1602, 1452, 1276, 1114, 717 cm<sup>-1</sup>.

HRMS (ESI-MS) *m/z* [M+NH<sub>4</sub>]<sup>+</sup> calcd for C<sub>16</sub>H<sub>27</sub>ClNO<sub>2</sub>: 300.1725, found: 300.1729.

[α]<sub>D</sub><sup>23</sup> = -9.2 (*c* 1.0, CHCl<sub>3</sub>); 88% ee, from (*S,S*)-**L\***.



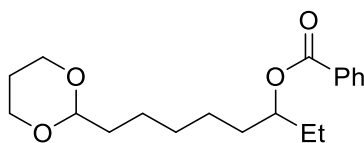

**8-((1,3-Dioxan-2-yl)octan-3-yl)benzoate (Figure 3, entry 29).** The title compound was synthesized according to **GP-2** from 1-bromopropyl benzoate and 2-(pent-4-en-1-yl)-1,3-dioxane. The product was purified by column chromatography on silica gel (1:4 Et<sub>2</sub>O/hexanes). Colorless oil.

(*S,S*)-**L\***: 173 mg, 68% yield, 89% ee; (*R,R*)-**L\***: 176 mg, 69% yield, 88% ee.

HPLC analysis: The ee was determined via HPLC on a CHIRALPAK AD column (1% *i*-PrOH in hexane, 1.0 mL/min); retention times for compound obtained using (*S,S*)-**L\***: 9.2 min (minor), 10.8 min (major).

<sup>1</sup>H NMR (400 MHz, CDCl<sub>3</sub>) δ 8.12 – 8.00 (m, 2H), 7.61 – 7.50 (m, 1H), 7.48 – 7.35 (m, 2H), 5.14 – 5.00 (m, 1H), 4.48 (t, *J* = 5.2 Hz, 1H), 4.14 – 4.02 (m, 2H), 3.78 – 3.65 (m, 2H), 2.16 – 1.96 (m, 1H), 1.77 – 1.51 (m, 6H), 1.46 – 1.27 (m, 7H), 0.94 (t, *J* = 7.4 Hz, 3H).

<sup>13</sup>C NMR (101 MHz, CDCl<sub>3</sub>) δ 166.5, 132.8, 131.0, 129.7, 128.4, 102.4, 76.2, 67.0, 35.3, 33.7, 29.5, 27.2, 26.0, 25.4, 24.0, 9.8.

FT-IR (film): 2951, 1716, 1456, 1276, 1145, 714 cm<sup>-1</sup>.

HRMS (ESI-MS) *m/z* [M+NH<sub>4</sub>]<sup>+</sup> calcd for C<sub>19</sub>H<sub>32</sub>NO<sub>4</sub>: 338.2326, found: 338.2335.

[α]<sub>D</sub><sup>23</sup> = -8.3 (*c* 1.0, CHCl<sub>3</sub>); 89% ee, from (*S,S*)-**L\***.

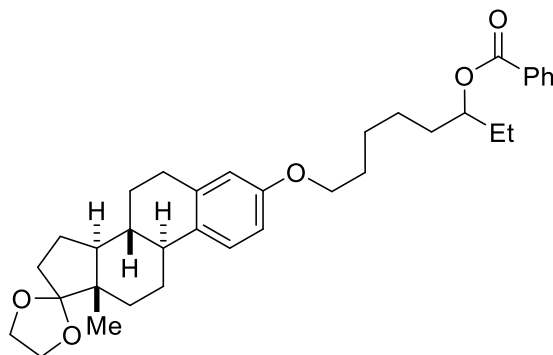

**8-(((8*R*,9*S*,13*S*,14*S*)-13-Methyl-6,7,8,9,11,12,13,14,15,16-decahydrospiro[cyclopenta[*a*]phenanthrene-17,2'-[1,3]dioxolan]-3-yl)oxy)octan-3-yl benzoate (Figure 3, entries 30 and 31).** The title compound was synthesized according to **GP-2** from 1-bromopropyl benzoate and (8*R*,9*S*,13*S*,14*S*)-13-methyl-3-(pent-4-en-1-yloxy)-6,7,8,9,11,12,13,14,15,16-decahydrospiro[cyclopenta[*a*]phenanthrene-17,2'-[1,3]dioxolane]. The product was purified by column chromatography on silica gel (1:4 Et<sub>2</sub>O/hexanes). Colorless oil.

(*S,S*)-**L\***: 354 mg, 81% yield, 95:5 d.r.; (*R,R*)-**L\***: 344 mg, 79% yield, 7:93 d.r.

HPLC analysis: The d.r. was determined via HPLC on a CHIRALPAK IC column (5% *i*-PrOH in hexane, 1.0 mL/min); retention times for compound obtained using (*S,S*)-**L\***: 10.0 min (major), 10.9 min (minor).

NMR data for the product from (*S,S*)-L\*:

<sup>1</sup>H NMR (400 MHz, CDCl<sub>3</sub>) δ 8.12 – 7.99 (m, 2H), 7.63 – 7.51 (m, 1H), 7.48 – 7.40 (m, 2H), 7.18 (d, *J* = 8.7 Hz, 1H), 6.67 (dd, *J* = 8.6, 2.8 Hz, 1H), 6.60 (d, *J* = 2.7 Hz, 1H), 5.16 – 5.02 (m, 1H), 3.99 – 3.87 (m, 6H), 2.88 – 2.77 (m, 2H), 2.38 – 2.16 (m, 2H), 2.10 – 1.97 (m, 1H), 1.92 – 1.59 (m, 11H), 1.57 – 1.28 (m, 9H), 0.96 (t, *J* = 7.4 Hz, 3H), 0.88 (s, 3H).

<sup>13</sup>C NMR (101 MHz, CDCl<sub>3</sub>) δ 166.5, 157.0, 138.1, 132.8, 132.7, 130.9, 129.7, 128.4, 126.4, 119.6, 114.5, 112.1, 76.2, 67.8, 65.4, 64.7, 49.5, 46.3, 43.8, 39.2, 34.4, 33.8, 30.9, 29.9, 29.4, 27.2, 27.1, 26.3, 26.2, 25.3, 22.5, 14.5, 9.8.

NMR data for the product from (*R,R*)-L\*:

<sup>1</sup>H NMR (400 MHz, CDCl<sub>3</sub>) δ 8.13 – 7.99 (m, 2H), 7.59 – 7.52 (m, 1H), 7.48 – 7.41 (m, 2H), 7.18 (d, *J* = 8.6 Hz, 1H), 6.67 (dd, *J* = 8.6, 2.8 Hz, 1H), 6.60 (d, *J* = 2.7 Hz, 1H), 5.16 – 5.02 (m, 1H), 4.02 – 3.87 (m, 6H), 2.87 – 2.78 (m, 2H), 2.37 – 2.17 (m, 2H), 2.10 – 1.98 (m, 1H), 1.92 – 1.61 (m, 11H), 1.57 – 1.28 (m, 9H), 0.95 (t, *J* = 7.4 Hz, 3H), 0.88 (s, 3H).

<sup>13</sup>C NMR (101 MHz, CDCl<sub>3</sub>) δ 166.6, 157.0, 138.1, 132.9, 132.7, 130.9, 129.7, 128.4, 126.4, 119.6, 114.6, 112.1, 76.2, 67.8, 65.4, 64.7, 49.5, 46.3, 43.8, 39.2, 34.4, 33.8, 30.9, 29.9, 29.4, 27.2, 27.1, 26.3, 26.2, 25.3, 22.5, 14.5, 9.8.

FT-IR (film): 3416, 2922, 1714, 1607, 1470, 1275, 717 cm<sup>-1</sup>.

HRMS (ESI-MS) *m/z* [M+NH<sub>4</sub>]<sup>+</sup> calcd for C<sub>35</sub>H<sub>50</sub>NO<sub>5</sub>: 564.3684, found: 564.3679.

[α]<sub>D</sub><sup>23</sup> = +13.5 (*c* 1.0, CHCl<sub>3</sub>); 95:5 d.r., from (*S,S*)-L\*.

[α]<sub>D</sub><sup>23</sup> = +22.4 (*c* 1.0, CHCl<sub>3</sub>); 7:93 d.r., from (*R,R*)-L\*.

The title compound was also synthesized according to **GP-2**, using 2.0 equiv of the olefin: (*S,S*)-L\*: 281 mg, 64% yield, 94:6 d.r.; (*R,R*)-L\*: 294 mg, 67% yield, 6:94 d.r.

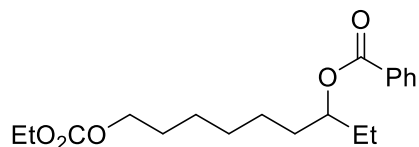

**9-((Ethoxycarbonyl)oxy)nonan-3-yl benzoate (Figure 3, entry 32).** The title compound was synthesized according to **GP-2** from 1-bromopropyl benzoate and ethyl hex-5-en-1-yl carbonate. The product was purified by column chromatography on silica gel (1:5 Et<sub>2</sub>O/hexanes). Colorless oil.

(*S,S*)-L\*: 169 mg, 63% yield, 91% ee; (*R,R*)-L\*: 175 mg, 65% yield, 91% ee.

HPLC analysis: The ee was determined via HPLC on a CHIRALPAK AD column (1% *i*-PrOH in hexane, 1.0 mL/min); retention times for compound obtained using (*S,S*)-L\*: 8.8 min (major), 9.9 min (minor).

<sup>1</sup>H NMR (400 MHz, CDCl<sub>3</sub>) δ 8.14 – 7.99 (m, 2H), 7.61 – 7.50 (m, 1H), 7.49 – 7.37 (m, 2H), 5.14 – 5.00 (m, 1H), 4.18 (q, *J* = 7.1 Hz, 2H), 4.10 (t, *J* = 6.7 Hz, 2H), 1.77 – 1.57 (m, 6H), 1.44 – 1.22 (m, 9H), 0.94 (t, *J* = 7.4 Hz, 3H).

<sup>13</sup>C NMR (101 MHz, CDCl<sub>3</sub>) δ 166.5, 155.4, 132.9, 130.9, 129.7, 128.4, 76.2, 68.0, 63.9, 33.7, 29.3, 28.7, 27.2, 25.8, 25.4, 14.4, 9.8.

FT-IR (film): 2939, 2357, 1716, 1603, 1455, 1269, 1109, 712  $\text{cm}^{-1}$ .

HRMS (ESI-MS)  $m/z$   $[M+Na]^+$  calcd for  $\text{C}_{19}\text{H}_{28}\text{NaO}_5$ : 359.1829, found: 359.1838.

$[\alpha]^{23}_{\text{D}} = -8.1$  ( $c$  1.0,  $\text{CHCl}_3$ ); 91% ee, from (*S,S*)-**L\***.

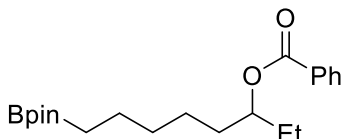

**8-(4,4,5,5-Tetramethyl-1,3,2-dioxaborolan-2-yl)octan-3-yl benzoate (Figure 3, entry 33).**

The title compound was synthesized according to **GP-2** from 1-bromopropyl benzoate and 4,4,5,5-tetramethyl-2-(pent-4-en-1-yl)-1,3,2-dioxaborolane. The product was purified by column chromatography on silica gel (1:4  $\text{Et}_2\text{O}$ /hexanes). Colorless oil.

(*S,S*)-**L\***: 194 mg, 68% yield, 88% ee; (*R,R*)-**L\***: 182 mg, 63% yield, 89% ee.

HPLC analysis: The ee was determined via HPLC on a CHIRALPAK IC column (5% *i*-PrOH in hexane, 1.0 mL/min); retention times for compound obtained using (*S,S*)-**L\***: 20.1 min (minor), 21.4 min (major).

$^1\text{H}$  NMR (400 MHz,  $\text{CDCl}_3$ )  $\delta$  8.13 – 7.99 (m, 2H), 7.58 – 7.51 (m, 1H), 7.47 – 7.39 (m, 2H), 5.16 – 4.98 (m, 1H), 1.74 – 1.61 (m, 4H), 1.45 – 1.26 (m, 6H), 1.23 (s, 12H), 0.94 (t,  $J = 7.5$  Hz, 3H), 0.75 (t,  $J = 7.6$  Hz, 2H).

$^{13}\text{C}$  NMR (101 MHz,  $\text{CDCl}_3$ )  $\delta$  166.5, 132.8, 131.0, 129.7, 128.4, 83.0, 76.3, 33.7, 32.5, 27.2, 25.3, 24.9, 24.0, 11.4, 9.8.

FT-IR (film): 2933, 1716, 1456, 1361, 1113, 717  $\text{cm}^{-1}$ .

HRMS (ESI-MS)  $m/z$   $[M+\text{NH}_4]^+$  calcd for  $\text{C}_{21}\text{H}_{37}\text{BNO}_4$ : 378.2810, found: 378.2817.

$[\alpha]^{23}_{\text{D}} = -8.5$  ( $c$  1.0,  $\text{CHCl}_3$ ); 88% ee, from (*S,S*)-**L\***.

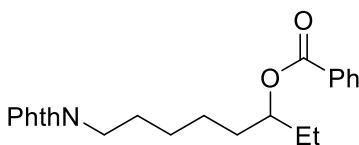

**8-(1,3-Dioxoisindolin-2-yl)octan-3-yl benzoate (Figure 3, entry 34).** The title compound was synthesized according to **GP-2** from 1-bromopropyl benzoate and 2-(pent-4-en-1-yl)isoindoline-1,3-dione. The product was purified by column chromatography on silica gel (1:3  $\text{Et}_2\text{O}$ /hexanes). Colorless oil.

(*S,S*)-**L\***: 223 mg, 74% yield, 89% ee; (*R,R*)-**L\***: 234 mg, 77% yield, 89% ee.

HPLC analysis: The ee was determined via HPLC on a CHIRALPAK IC column (10% *i*-PrOH in hexane, 1.0 mL/min); retention times for compound obtained using (*S,S*)-**L\***: 13.4 min (major), 16.7 min (minor).

$^1\text{H}$  NMR (400 MHz,  $\text{CDCl}_3$ )  $\delta$  8.11 – 7.99 (m, 2H), 7.90 – 7.79 (m, 2H), 7.77 – 7.64 (m, 2H), 7.60 – 7.49 (m, 1H), 7.49 – 7.36 (m, 2H), 5.13 – 4.98 (m, 1H), 3.66 (t,  $J = 7.6$  Hz, 2H), 1.79 – 1.55 (m, 6H), 1.50 – 1.27 (m, 4H), 0.93 (t,  $J = 7.4$  Hz, 3H).

$^{13}\text{C}$  NMR (101 MHz,  $\text{CDCl}_3$ )  $\delta$  168.6, 166.5, 134.0, 132.8, 132.3, 130.9, 129.7, 128.4, 123.3, 76.1, 38.1, 33.7, 28.6, 27.2, 27.0, 25.1, 9.8.

FT-IR (film): 3470, 2922, 1714, 1277, 701  $\text{cm}^{-1}$ .

HRMS (ESI-MS)  $m/z$   $[\text{M}+\text{Na}]^+$  calcd for  $\text{C}_{23}\text{H}_{25}\text{NNaO}_4$ : 402.1676, found: 402.1677.

$[\alpha]^{23}_{\text{D}} = -4.4$  ( $c$  1.0,  $\text{CHCl}_3$ ); 89% ee, from (*S,S*)-**L**\*.

The title compound was also synthesized according to **GP-2**, using 2.0 equiv of the olefin: (*S,S*)-**L**\*: 202 mg, 67% yield, 89% ee; (*R,R*)-**L**\*: 205 mg, 68% yield, 89% ee.

## IV. Effect of Reaction Parameters

### General Procedure 6 (GP-6).

**Preparation of a solution of the catalyst:** In a nitrogen-filled glovebox, an oven-dried 4 mL vial that contained a magnetic stir bar was charged with NiBr<sub>2</sub>·diglyme (3.5 mg, 0.010 mmol, 0.10 equiv), (*S,S*)-L\* (7.7 mg, 0.012 mmol, 0.12 equiv), and K<sub>3</sub>PO<sub>4</sub>·H<sub>2</sub>O (69 mg, 0.30 mmol, 3.0 equiv). Next, anhydrous MTBE (1.0 mL) was added, the vial was capped with a PTFE septum cap, and the mixture was stirred at room temperature for 30 min, at which time it was a pink heterogeneous solution.

**Coupling:** In a nitrogen-filled glovebox, the electrophile (0.10 mmol, 1.0 equiv), olefin (0.30 mmol, 3.0 equiv), and triethoxysilane (55 μL, 0.30 mmol, 3.0 equiv) were added in turn dropwise to the reaction mixture. The vial was capped with a PTFE septum cap and taken out of the glovebox. The mixture was stirred vigorously (1100 rpm) at room temperature for 20 h.

**Work-up:** *n*-Dodecane (23 μL, 0.10 mmol, 1.0 equiv) was added via syringe. The reaction mixture was passed through a short pad of silica gel, with Et<sub>2</sub>O as the eluent. The solvent was removed under reduced pressure, and the residue was purified by chromatography.

1-Bromopropyl benzoate was reacted with vinylcyclohexane according to **GP-6**. The yields were determined via GC analysis, with *n*-dodecane as the internal standard. The ee values were determined via HPLC analysis after purification by preparative thin-layer chromatography. All data are the average of two experiments.

**Table S-1.** Effect of Reaction Parameters.

10 mol% NiBr<sub>2</sub>·diglyme  
12 mol% (S,S)-L\*  
3.0 equiv (EtO)<sub>3</sub>SiH  
3.0 equiv K<sub>3</sub>PO<sub>4</sub>·H<sub>2</sub>O  
MTBE, r.t., 20 h  
"standard conditions"

| entry | variation from the "standard conditions"                                                     | yield (%) <sup>a</sup> | ee (%) <sup>b</sup> |
|-------|----------------------------------------------------------------------------------------------|------------------------|---------------------|
| 1     | none                                                                                         | 78                     | 92                  |
| 2     | no NiBr <sub>2</sub> ·diglyme                                                                | <1                     | –                   |
| 3     | no (S,S)-L*                                                                                  | <1                     | –                   |
| 4     | <b>L1</b> , instead of (S,S)-L*                                                              | 31                     | 19                  |
| 5     | <b>L2</b> , instead of (S,S)-L*                                                              | 8                      | <2                  |
| 6     | <b>L3</b> , instead of (S,S)-L*                                                              | 15                     | <2                  |
| 7     | <b>L4</b> , instead of (S,S)-L*                                                              | 7                      | 51                  |
| 8     | <b>L5</b> , instead of (S,S)-L*                                                              | 10                     | <2                  |
| 9     | <i>i</i> -Pr <sub>2</sub> O, instead of MTBE                                                 | 74                     | 92                  |
| 10    | Et <sub>2</sub> O, instead of MTBE                                                           | 64                     | 90                  |
| 11    | 5.0 mol% NiBr <sub>2</sub> ·diglyme, 6.0 mol% (S,S)-L*                                       | 38                     | 85                  |
| 12    | 2.0 equiv vinylcyclohexane                                                                   | 59                     | 89                  |
| 13    | 1.5 equiv (EtO) <sub>3</sub> SiH, 1.5 equiv K <sub>3</sub> PO <sub>4</sub> ·H <sub>2</sub> O | 53                     | 92                  |
| 14    | (MeO) <sub>3</sub> SiH, instead of (EtO) <sub>3</sub> SiH                                    | 74                     | 92                  |
| 15    | (EtO) <sub>2</sub> MeSiH, instead of (EtO) <sub>3</sub> SiH                                  | 63                     | 89                  |
| 16    | 10, instead of 20, h                                                                         | 59                     | 91                  |
| 17    | 0.1 equiv H <sub>2</sub> O added                                                             | 76                     | 92                  |
| 18    | under air in a closed vial                                                                   | 61                     | 90                  |

All data are the average of two experiments. <sup>a</sup>Determined through GC analysis. <sup>b</sup>Determined through HPLC analysis.

**L1**      **L2**

**L3**      **L4**      **L5**

## V. Functional-Group Compatibility

1-Bromopropyl benzoate was reacted with vinylcyclohexane according to **GP-6**, in the presence of 1.0 equiv of the additives shown below. The additive was added after the vinylcyclohexane.

The yield of the coupling product and the percent recovery of the additive were determined via GC analysis, with *n*-dodecane as the internal standard. The ee values were determined via HPLC analysis after purification by preparative thin-layer chromatography.

**Table S-2.** Functional-Group Compatibility.

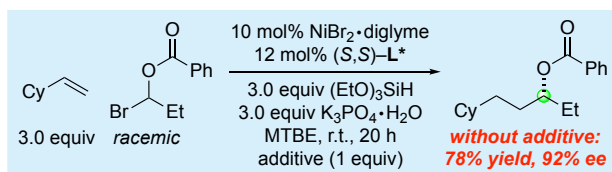

| entry | additive | recovery of additive (%) | yield (%) <sup>a</sup> | ee (%) <sup>b</sup> | entry | additive | recovery of additive (%) | yield (%) <sup>a</sup> | ee (%) <sup>b</sup> |
|-------|----------|--------------------------|------------------------|---------------------|-------|----------|--------------------------|------------------------|---------------------|
| 1     |          | >95                      | 80                     | 91                  | 13    |          | >95                      | 79                     | 91                  |
| 2     |          | >95                      | 78                     | 91                  | 14    |          | >95                      | 77                     | 90                  |
| 3     |          | >95                      | 81                     | 91                  | 15    |          | >95                      | 78                     | 89                  |
| 4     |          | >95                      | 79                     | 89                  | 16    |          | >95                      | 78                     | 91                  |
| 5     |          | >95                      | 76                     | 89                  | 17    |          | >95                      | 65                     | 91                  |
| 6     |          | >95                      | 80                     | 89                  | 18    |          | >95                      | 72                     | 89                  |
| 7     |          | >95                      | 79                     | 90                  | 19    |          | >95                      | 66                     | 89                  |
| 8     |          | >95                      | 78                     | 90                  | 20    |          | >95                      | 54                     | 84                  |
| 9     |          | >95                      | 78                     | 91                  | 21    |          | 64                       | 76                     | 90                  |
| 10    |          | >95                      | 79                     | 87                  | 22    |          | 94                       | 43                     | 92                  |
| 11    |          | >95                      | 76                     | 90                  | 23    |          | 88                       | 18                     | 52                  |
| 12    |          | >95                      | 81                     | 91                  | 24    |          | 59                       | 20                     | 66                  |

<sup>a</sup> Analyzed via GC.

<sup>b</sup> Analyzed via HPLC.

## VI. Four-Component Reactions

### General Procedure 7 (GP-7): MTBE as the solvent.

**Preparation of a solution of the electrophile:** In the air, ZnF<sub>2</sub> (8.2 mg, 0.080 mmol, 0.10 equiv) was added to an oven-dried 4 mL vial equipped with a stir bar. The vial was closed with a PTFE septum cap, the joint was wrapped with electrical tape, and the vial was placed under a nitrogen atmosphere by evacuating and backfilling the vial (three cycles). Then, the acyl bromide (0.80 mmol, 1.0 equiv) and DCM (0.5 mL) were added. The resulting solution was cooled to -20 °C, and the resulting mixture was stirred for 10 min. At this temperature, the aldehyde (1.0 equiv) was added dropwise via microsyringe over 1 min, and the resulting mixture was stirred for 2 h.

**Preparation of a solution of the catalyst:** In the air, NiBr<sub>2</sub>·diglyme (28.2 mg, 0.081 mmol, 0.10 equiv), (*S,S*)-L\* (61.2 mg, 0.096 mmol, 0.12 equiv), and K<sub>3</sub>PO<sub>4</sub>·H<sub>2</sub>O (552 mg, 2.4 mmol, 3.0 equiv) were added to a separate oven-dried 40 mL vial equipped with a cross stir bar. The vial was closed with a PTFE septum cap, the joint was wrapped with electrical tape, and the vial was placed under a nitrogen atmosphere by evacuating and backfilling the vial (three cycles). Anhydrous MTBE (4 mL) was added to the vial, and the mixture was stirred at room temperature for 30 min.

**Coupling:** A balloon filled with nitrogen was attached to a 40 mL vial. Then, the solution of the electrophile was added via syringe in one portion. The 4 mL vial was rinsed with MTBE, and the rinses (2 mL x 2) were added to the 40 mL vial. Next, the olefin (2.4 mmol, 3.0 equiv) and triethoxysilane (440 μL, 2.4 mmol, 3.0 equiv) were added in turn dropwise to the reaction mixture. The balloon was removed, and the septum cap was sealed with vacuum grease. The mixture was stirred vigorously (1100 rpm) at room temperature for 20 h.

**Work-up:** The reaction mixture was passed through a plug of silica gel, and the vial, the cap, and the silica gel were rinsed with Et<sub>2</sub>O. The filtrate was concentrated, and the residue was purified by flash chromatography on silica gel.

### General Procedure 8 (GP-8): *i*-Pr<sub>2</sub>O as the solvent.

**Preparation of the electrophile:** Same as GP-7.

**Preparation of a solution of the catalyst:** In the air, NiBr<sub>2</sub>·diglyme (28.2 mg, 0.081 mmol, 0.10 equiv), (*S,S*)-L\* (61.2 mg, 0.096 mmol, 0.12 equiv), and K<sub>3</sub>PO<sub>4</sub>·H<sub>2</sub>O (368 mg, 1.6 mmol, 2.0 equiv) were added to a separate oven-dried 40 mL vial equipped with a cross stir bar. The vial was closed with a PTFE septum cap, the joint was wrapped with electrical tape, and the vial was placed under a nitrogen atmosphere by evacuating and backfilling the vial (three cycles). Anhydrous *i*-Pr<sub>2</sub>O (2 mL) was added to the vial, and the mixture was stirred at room temperature for 30 min.

**Coupling:** A balloon filled with nitrogen was attached to a 40 mL vial. Then, the solution of the electrophile was added via syringe in one portion. The 4 mL vial was rinsed with *i*-Pr<sub>2</sub>O, and the rinses (1 mL x 2) were added to the 40 mL vial. Next, the olefin (2.4 mmol, 3.0



equiv) and triethoxysilane (300  $\mu$ L, 1.6 mmol, 2.0 equiv) were added in turn dropwise to the reaction mixture. The balloon was removed, and the septum cap was sealed with vacuum grease. The mixture was stirred vigorously (1100 rpm) at room temperature for 20 h.

**Work-up:** Same as **GP-7**.

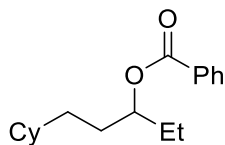

**1-Cyclohexylpentan-3-yl benzoate (Figure 4, entry 35).** The title compound was synthesized according to **GP-7** from benzoyl bromide, propionaldehyde, and vinylcyclohexane. The product was purified by column chromatography on silica gel (1:40 Et<sub>2</sub>O/hexanes). Colorless oil.

(*S,S*)-**L**\*: 151 mg, 69% yield, 92% ee; (*R,R*)-**L**\*: 158 mg, 72% yield, 90% ee.

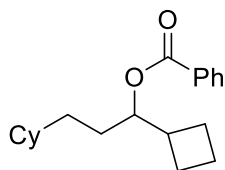

**1-Cyclobutyl-3-cyclohexylpropyl benzoate (Figure 4, entry 36).** The title compound was synthesized according to **GP-7** from benzoyl bromide, cyclobutanecarbaldehyde, and vinylcyclohexane. The product was purified by column chromatography on silica gel (1:40 Et<sub>2</sub>O/hexanes). Colorless oil.

(*S,S*)-**L**\*: 170 mg, 71% yield, 95% ee; (*R,R*)-**L**\*: 169 mg, 70% yield, 96% ee.

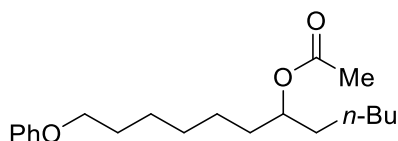

**12-Phenoxydodecan-6-yl acetate (Figure 4, entry 37).** The title compound was synthesized according to **GP-8** from acetyl bromide, hexanal, and (hex-5-en-1-yloxy)benzene. The product was purified by column chromatography on silica gel (1:9 Et<sub>2</sub>O/hexanes). Colorless oil.

(*S,S*)-**L**\*: 150 mg, 58% yield, 91% ee; (*R,R*)-**L**\*: 149 mg, 58% yield, 91% ee.

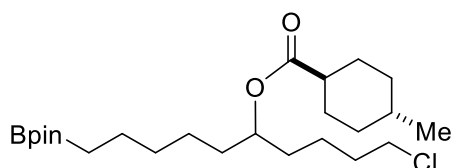

**1-Chloro-10-(4,4,5,5-tetramethyl-1,3,2-dioxaborolan-2-yl)decan-5-yl ((1*r*,4*r*)-4-methylcyclohexane-1-carboxylate (Figure 4, entry 38).** The title compound was synthesized according to GP-8 from ((1*r*,4*r*)-4-methylcyclohexane-1-carbonyl bromide, 5-chloropentanal, and 4,4,5,5-tetramethyl-2-(pent-4-en-1-yl)-1,3,2-dioxaborolane. The product was purified by column chromatography on silica gel (1:5 Et<sub>2</sub>O/hexanes). Colorless oil.

(*S,S*)-L\*: 234 mg, 66% yield, 92% ee; (*R,R*)-L\*: 229 mg, 65% yield, 92% ee.

HPLC analysis: The ee was determined after transforming the Bpin group to an OBz group (see below).

<sup>1</sup>H NMR (400 MHz, CDCl<sub>3</sub>) δ 4.92 – 4.78 (m, 1H), 3.51 (t, *J* = 6.8 Hz, 2H), 2.17 (tt, *J* = 12.2, 3.6 Hz, 1H), 1.97 – 1.88 (m, 2H), 1.83 – 1.68 (m, 4H), 1.58 – 1.17 (m, 27H), 0.98 – 0.90 (m, 2H), 0.88 (d, *J* = 6.4 Hz, 3H), 0.75 (t, 2H).

<sup>13</sup>C NMR (101 MHz, CDCl<sub>3</sub>) δ 176.2, 94.1, 83.0, 73.3, 45.0, 43.7, 34.4, 34.2, 33.5, 32.5, 32.4, 32.2, 29.3, 25.2, 25.0, 24.0, 22.71, 22.67, 11.6.

FT-IR (film): 3420, 2918, 1734, 1448, 1267, 1146, 850, 728 cm<sup>-1</sup>.

HRMS (ESI-MS) *m/z* [M+NH<sub>4</sub>]<sup>+</sup> calcd for C<sub>24</sub>H<sub>48</sub>BClNO<sub>4</sub>: 460.3359, found: 460.3352.

[α]<sub>D</sub><sup>23</sup> = -3.7 (*c* 1.0, CHCl<sub>3</sub>); 92% ee, from (*S,S*)-L\*.

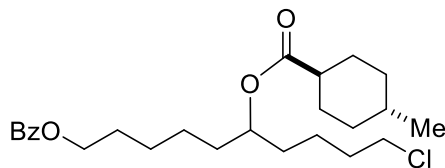

**10-Chloro-6-(((1*r*,4*r*)-4-methylcyclohexane-1-carbonyloxy)decyl benzoate.** The purified product (44.2 mg, 0.10 mmol, 1.0 equiv) was oxidized with NaBO<sub>3</sub>·4H<sub>2</sub>O (73.8 mg, 0.48 mmol, 4.8 equiv) in THF/H<sub>2</sub>O (1:1; 6 mL) at room temperature for 16 h. The mixture was extracted with Et<sub>2</sub>O (5 mL x 3). The combined organic layers were dried over Na<sub>2</sub>SO<sub>4</sub>, filtered, and concentrated to afford the primary alcohol, which was used without further purification.

In the air, benzoyl chloride (24 μL, 0.21 mmol, 2.0 equiv) was added to a solution of the primary alcohol and pyridine (16 μL, 0.20 mmol, 2.0 equiv) in DCM (2 mL). The reaction mixture was stirred at room temperature for 3 h, and then it was concentrated. The product was purified by flash chromatography on silica gel (1:5 Et<sub>2</sub>O/hexanes). Colorless oil.

(*S,S*)-L\*: 33.1 mg, 76% yield, 92% ee; (*R,R*)-L\*: 29.8 mg, 68% yield, 92% ee.

HPLC analysis: The ee was determined via HPLC on a CHIRALCEL OD column (3% *i*-PrOH in hexane, 1.0 mL/min); retention times for compound obtained using (*S,S*)-L\*: 7.5 min (major), 8.9 min (minor).

<sup>1</sup>H NMR (400 MHz, CDCl<sub>3</sub>) 8.09 – 7.98 (m, 2H), 7.62 – 7.50 (m, 1H), 7.49 – 7.37 (m, 2H), 4.97 – 4.79 (m, 1H), 4.30 (t, *J* = 6.6 Hz, 2H), 3.51 (t, *J* = 6.6 Hz, 2H), 2.18 (tt, *J* = 12.2, 3.5 Hz, 1H), 2.01 –

1.86 (m, 2H), 1.85 – 1.67 (m, 6H), 1.63 – 1.27 (m, 13H), 0.97 – 0.90 (m, 2H), 0.88 (d,  $J = 6.8$  Hz, 3H).

$^{13}\text{C}$  NMR (101 MHz,  $\text{CDCl}_3$ )  $\delta$  176.3, 166.8, 133.0, 130.6, 129.7, 128.5, 73.1, 65.0, 45.0, 43.6, 34.4, 34.2, 33.5, 32.4, 32.1, 29.3, 28.8, 26.1, 25.1, 22.71, 22.65.

FT-IR (film): 3441, 2938, 2332, 1716, 1452, 1267, 1166, 1026, 718  $\text{cm}^{-1}$ .

HRMS (ESI-MS)  $m/z$   $[\text{M}+\text{Na}]^+$  calcd for  $\text{C}_{25}\text{H}_{37}\text{ClNaO}_4$ : 459.2273, found: 459.2285.

$[\alpha]_{\text{D}}^{23} = -2.1$  ( $c$  0.35,  $\text{CHCl}_3$ ); 92% ee, from (S,S)-**L**\*.

## VII. Applications

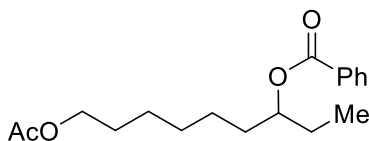

**9-Acetoxy-nonan-3-yl benzoate (Figure 4, entry 39).** The title compound was synthesized according to **GP-7** from benzoyl bromide, propionaldehyde, and hex-5-en-1-yl acetate. The product was purified by column chromatography on silica gel (1:5 Et<sub>2</sub>O/hexanes). Colorless oil.

(*S,S*)-**L**\*: 136 mg, 55% yield, 90% ee; (*R,R*)-**L**\*: 133 mg, 54% yield, 89% ee.

HPLC analysis: The ee was determined via HPLC on a CHIRALPAK AD column (2% *i*-PrOH in hexane, 1.0 mL/min); retention times for compound obtained using (*S,S*)-**L**\*: 6.9 min (major), 7.6 min (minor).

<sup>1</sup>H NMR (400 MHz, CDCl<sub>3</sub>) δ 8.15 – 7.97 (m, 2H), 7.64 – 7.49 (m, 1H), 7.50 – 7.38 (m, 2H), 5.15 – 5.00 (m, 1H), 4.03 (t, *J* = 6.7 Hz, 2H), 2.03 (s, 3H), 1.79 – 1.54 (m, 6H), 1.47 – 1.27 (m, 6H), 0.94 (t, *J* = 7.4 Hz, 3H).

<sup>13</sup>C NMR (101 MHz, CDCl<sub>3</sub>) δ 171.4, 166.5, 132.8, 130.9, 129.6, 128.4, 76.2, 64.7, 33.7, 29.3, 28.6, 27.2, 25.9, 25.4, 21.1, 9.8.

FT-IR (film): 3548, 2936, 1715, 1602, 1453, 1365, 1271, 1110, 711 cm<sup>-1</sup>.

HRMS (ESI-MS) *m/z* [M+Na]<sup>+</sup> calcd for C<sub>18</sub>H<sub>26</sub>NaO<sub>4</sub>: 329.1723, found: 329.1731.

[α]<sup>23</sup><sub>D</sub> = -8.5 (*c* 1.0, CHCl<sub>3</sub>); 90% ee, from (*S,S*)-**L**\*.

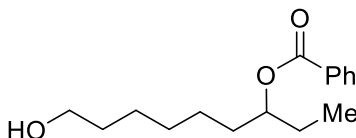

**9-Hydroxy-nonan-3-yl benzoate (Figure 4, entry 40).** In the air, HBF<sub>4</sub>·Et<sub>2</sub>O (0.10 mL) was added to a solution of the acetate (61.2 mg, 0.20 mmol, 1.0 equiv) in MeOH (2 mL) at room temperature, and the resulting reaction mixture was stirred at room temperature for 3 h. Next, the reaction mixture was concentrated, and then the residue was purified by flash chromatography on silica gel (1:2 Et<sub>2</sub>O/hexanes). Colorless oil. The analytical data matched the literature report.<sup>3a</sup>

(*S,S*)-**L**\*: 50.4 mg, 95% yield, 90% ee; (*R,R*)-**L**\*: 49.7 mg, 94% yield, 89% ee.

HPLC analysis: The ee was determined via HPLC on a CHIRALCEL OJ column (5% *i*-PrOH in hexane, 1.0 mL/min); retention times for compound obtained using (*S,S*)-**L**\*: 9.3 min (minor), 10.0 min (major).

<sup>1</sup>H NMR (400 MHz, CDCl<sub>3</sub>) δ 8.12 – 7.97 (m, 2H), 7.63 – 7.49 (m, 1H), 7.49 – 7.36 (m, 2H), 5.16 – 4.99 (m, 1H), 3.60 (t, *J* = 6.6 Hz, 2H), 1.77 – 1.59 (m, 5H), 1.58 – 1.47 (m, 2H), 1.44 – 1.27 (m, 6H), 0.94 (t, *J* = 7.4 Hz, 3H).

$^{13}\text{C}$  NMR (101 MHz,  $\text{CDCl}_3$ )  $\delta$  166.6, 132.8, 130.9, 129.6, 128.4, 76.2, 63.0, 33.7, 32.7, 29.4, 27.2, 25.7, 25.4, 9.8.

FT-IR (film): 3370, 2939, 2361, 1717, 1275, 1100, 713  $\text{cm}^{-1}$ .

HRMS (ESI-MS)  $m/z$   $[\text{M}+\text{Na}]^+$  calcd for  $\text{C}_{16}\text{H}_{24}\text{NaO}_3$ : 287.1618, found: 287.1623.

$[\alpha]^{23}_{\text{D}} = -9.5$  ( $c$  1.0,  $\text{CHCl}_3$ ); 90% ee, from (*S,S*)-**L\***.

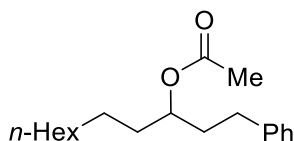

**1-Phenylundecan-3-yl acetate (Figure 4, entry 41).** The title compound was synthesized according to **GP-8** from acetyl bromide, 3-phenylpropanal, and 1-octene. The product was purified by column chromatography on silica gel (1:20  $\text{Et}_2\text{O}$ /hexanes). Colorless oil. The analytical data matched the literature report.<sup>4a</sup>

(*S,S*)-**L\***: 130 mg, 56% yield, 90% ee; (*R,R*)-**L\***: 119 mg, 51% yield, 90% ee.

HPLC analysis: The ee was determined via HPLC on a CHIRALPAK AD column (0.5% *i*-PrOH in hexane, 1.0 mL/min); retention times for compound obtained using (*S,S*)-**L\***: 6.2 min (major), 7.0 min (minor).

$^1\text{H}$  NMR (400 MHz,  $\text{CDCl}_3$ )  $\delta$  7.36 – 7.24 (m, 2H), 7.23 – 7.12 (m, 3H), 5.02 – 4.86 (m, 1H), 2.71 – 2.51 (m, 2H), 2.04 (s, 3H), 1.96 – 1.78 (m, 2H), 1.65 – 1.48 (m, 2H), 1.38 – 1.16 (m, 12H), 0.88 (t,  $J = 6.8$  Hz, 3H).

$^{13}\text{C}$  NMR (101 MHz,  $\text{CDCl}_3$ )  $\delta$  171.1, 141.9, 128.5, 128.4, 126.0, 74.1, 36.0, 34.3, 32.0, 31.9, 29.7, 29.6, 29.4, 25.4, 22.8, 21.4, 14.3.

FT-IR (film): 2931, 1738, 1455, 1377, 1240, 1024, 740  $\text{cm}^{-1}$ .

HRMS (ESI-MS)  $m/z$   $[\text{M}+\text{Na}]^+$  calcd for  $\text{C}_{19}\text{H}_{30}\text{NaO}_2$ : 313.2138, found: 313.2133.

$[\alpha]^{23}_{\text{D}} = -9.5$  ( $c$  1.0,  $\text{CHCl}_3$ ); 90% ee, from (*S,S*)-**L\***.

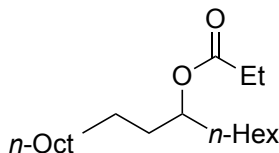

**Heptadecan-7-yl propionate (Figure 4, entry 42).** The title compound was synthesized according to **GP-8** from propionyl bromide, heptanal, and 1-decene. The product was purified by column chromatography on silica gel (1:20  $\text{Et}_2\text{O}$ /hexanes). Colorless oil. The analytical data matched the literature report.<sup>5</sup>

(*S,S*)-**L\***: 131 mg, 53% yield, 92% ee; (*R,R*)-**L\***: 128 mg, 51% yield, 93% ee.

HPLC analysis: The ee was determined after transforming the product to the corresponding phosphate (see below).

$^1\text{H}$  NMR (400 MHz,  $\text{CDCl}_3$ ) 4.92 – 4.81 (m, 1H), 2.30 (q,  $J = 7.6$  Hz, 2H), 1.56 – 1.44 (m, 4H), 1.36 – 1.18 (m, 24H), 1.14 (t,  $J = 7.6$  Hz, 3H), 0.93 – 0.81 (m, 6H).

$^{13}\text{C}$  NMR (101 MHz,  $\text{CDCl}_3$ )  $\delta$  174.5, 74.3, 34.3, 32.1, 31.9, 29.8, 29.72, 29.69, 29.5, 29.4, 28.1, 25.5, 25.4, 22.8, 22.7, 14.3, 14.2, 9.5.

FT-IR (film): 2926, 1738, 1463, 1379, 1275, 1192, 1082, 723  $\text{cm}^{-1}$ .

$[\alpha]_D^{25} = +2.1$  ( $c$  1.0,  $\text{CHCl}_3$ ); 92% ee, from (*S,S*)-**L\***.

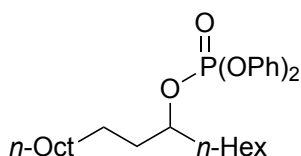

**Heptadecan-7-yl diphenyl phosphate.** The title compound was synthesized according to **GP-5**. The product was purified by column chromatography on silica gel (1:5 EtOAc/hexanes). Colorless oil.

(*S,S*)-**L\***: 93.7 mg, 96% yield, 92% ee; (*R,R*)-**L\***: 91.2 mg, 93% yield, 93% ee.

SFC analysis: The ee was determined via SFC on a CHIRALCEL OD column (4%  $\text{CH}_3\text{CN}$  in supercritical  $\text{CO}_2$ , 2.5 mL/min); retention times for compound obtained using (*S,S*)-**L\***: 14.7 min (major), 15.7 min (minor).

$^1\text{H}$  NMR (400 MHz,  $\text{CDCl}_3$ )  $\delta$  7.36 – 7.29 (m, 4H), 7.26 – 7.20 (m, 4H), 7.20 – 7.13 (m, 2H), 4.74 – 4.54 (m, 1H), 1.71 – 1.52 (m, 4H), 1.36 – 1.14 (m, 24H), 0.93 – 0.81 (m, 6H).

$^{13}\text{C}$  NMR (101 MHz,  $\text{CDCl}_3$ )  $\delta$  150.9 (d,  $J = 7.1$  Hz), 129.8, 125.2 (d,  $J = 1.0$  Hz), 120.2 (d,  $J = 5.1$  Hz), 82.5 (d,  $J = 7.1$  Hz), 35.1 (d,  $J = 5.1$  Hz), 32.0, 31.8, 29.71, 29.65, 29.6, 29.5, 29.4, 29.2, 24.9, 24.8, 22.8, 22.7, 14.24, 14.17.

$^{31}\text{P}$  NMR (162 MHz,  $\text{CDCl}_3$ )  $\delta$  -12.4.

FT-IR (film): 3485, 2916, 1592, 1495, 1296, 1198, 1020, 753  $\text{cm}^{-1}$ .

HRMS (ESI-MS)  $m/z$   $[\text{M}+\text{NH}_4]^+$  calcd for  $\text{C}_{29}\text{H}_{49}\text{NO}_4\text{P}$ : 506.3394, found: 506.3399.

$[\alpha]_D^{25} = +3.6$  ( $c$  1.0,  $\text{CHCl}_3$ ); 92% ee, from (*S,S*)-**L\***.

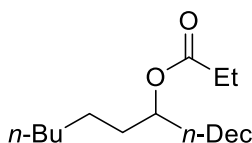

**Heptadecan-7-yl propionate (Figure 4, entry 42).** The title compound was synthesized according to **GP-8** from propionyl bromide, undecanal, and 1-hexene. The product was purified by column chromatography on silica gel (1:20 Et<sub>2</sub>O/hexanes). Colorless oil.

(*S,S*)-**L\***: 135 mg, 54% yield, 93% ee; (*R,R*)-**L\***: 138 mg, 55% yield, 93% ee.

### VIII. Assignment of Absolute Configuration

The configurations of the coupling products were assigned by comparison with published optical-rotation data.

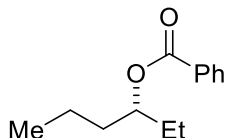

**(R)-Hexan-3-yl benzoate (Figure 3, entry 18).** The absolute configuration of this compound has been reported.<sup>7</sup> The material obtained with (*S,S*)-L\* has the (*R*) configuration, by comparison with the sign of the published optical rotation.

**Optical rotation:**  $[\alpha]^{23}_{\text{D}} = -4.8$  (*c* 1.0, CHCl<sub>3</sub>); 89% ee, from (*S,S*)-L\*.

Lit.:  $[\alpha]^{26}_{\text{D}} = -2.1$  (*c* 1.1, CHCl<sub>3</sub>); 99% ee, (*R*) configuration.

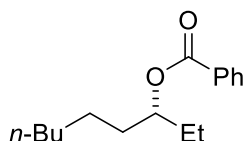

**(R)-Nonan-3-yl benzoate (Figure 3, entry 20).** The absolute configuration of this compound has been reported.<sup>6</sup> The material obtained with (*S,S*)-L\* has the (*R*) configuration, by comparison with the sign of the published optical rotation.

**Optical rotation:**  $[\alpha]^{23}_{\text{D}} = -8.9$  (*c* 1.0, CHCl<sub>3</sub>); 89% ee, from (*S,S*)-L\*.

Lit.:  $[\alpha]^{26}_{\text{D}} = -30$  (*c* 0.975, CHCl<sub>3</sub>); 99% ee, (*R*) configuration.

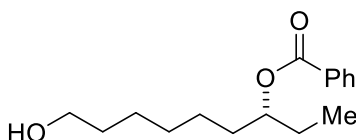

**(R)-9-Hydroxynonan-3-yl benzoate (Figure 4, entry 40).** The absolute configuration of this compound has been reported.<sup>3a</sup> The material obtained with (*S,S*)-L\* has the (*R*) configuration, by comparison with the published optical rotation.

**Optical rotation:**  $[\alpha]^{23}_{\text{D}} = -9.5$  (*c* 1.0, CHCl<sub>3</sub>); 90% ee, from (*S,S*)-L\*.

Lit.:  $[\alpha]^{20}_{\text{D}} = -8.6$  (*c* 1.3, CHCl<sub>3</sub>); 99% ee, (*R*) configuration.

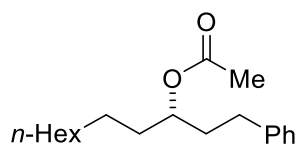

**(S)-1-Phenylundecan-3-yl acetate (Figure 4, entry 41).** The absolute configuration of this compound has been reported.<sup>4a</sup> The material obtained with (*S,S*)-**L\*** has the (*S*) configuration, by comparison with the sign of the published optical rotation.

**Optical rotation:**  $[\alpha]^{23}_{\text{D}} = -9.5$  (*c* 1.0,  $\text{CHCl}_3$ ); 90% ee, from (*S,S*)-**L\***.

Lit.:  $[\alpha]^{22}_{\text{D}} = +4.9$  (*c* 1.0,  $\text{CHCl}_3$ ); ee not provided; (*R*) configuration.



## IX. References

- (1) Liu, C.; Yi, J.-C.; Liang, X.-W.; Xu, R.-Q.; Dai, L.-X.; You, S.-L. *Chem. Eur. J.* **2016**, *22*, 10813–10816.
- (2) Ulich, L. H.; Adams, R. *J. Am. Chem. Soc.* **1921**, *43*, 660–667.
- (3) (a) Watanabe, T.; Kurata, I.; Hayashi, C.; Igarashi, M.; Sawa, R.; Takahashi, Y.; Akamatsu, Y. *Bioorg. Med. Chem. Lett.* **2010**, *20*, 5843–5846. (b) Jones, G. B.; Huber, R. S.; Chapman, B. J. *Tetrahedron: Asymmetry* **1997**, *8*, 1797–1809.
- (4) (a) Vlasyuk, A. L.; Voblikova, V. A.; Gamalevich, G. D.; Serebryakov, E. P. *Russ. Chem. Bull., Int. Ed.* **2013**, *62*, 2032–2036. (b) Vlasyuk, A. L.; Gamalevich, G. D.; Ignatenko, A. V.; Serebryakov, E. P.; Struchkova, M. I. *Russ. Chem. Bull., Int. Ed.* **2004**, *53*, 693–702.
- (5) Fujii, T.; Yamakawa, R.; Terashima, Y.; Imura, S.; Ishigaki, K.; Kinjo, M.; Ando, T. *J. Chem. Ecol.* **2013**, *39*, 28–36.
- (6) Oodera, J.; Sato, T. Preparation of Optically Active Organic Compound by Substitution Reaction with Configurational Inversion. Jpn. Patent 05294850, 1993.
- (7) León, F.; González-Liste, P. J.; García-Garrido, S. E.; Arribas, I.; Rubio, M.; Cadierno, V.; Pizzano, A. *J. Org. Chem.* **2017**, *82*, 5852–5867.

## X. NMR Spectra; ee Analysis

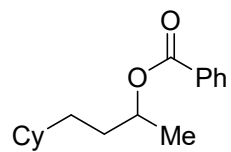

**Fig. 3, entry 1**  
**(400 MHz, CDCl<sub>3</sub>)**

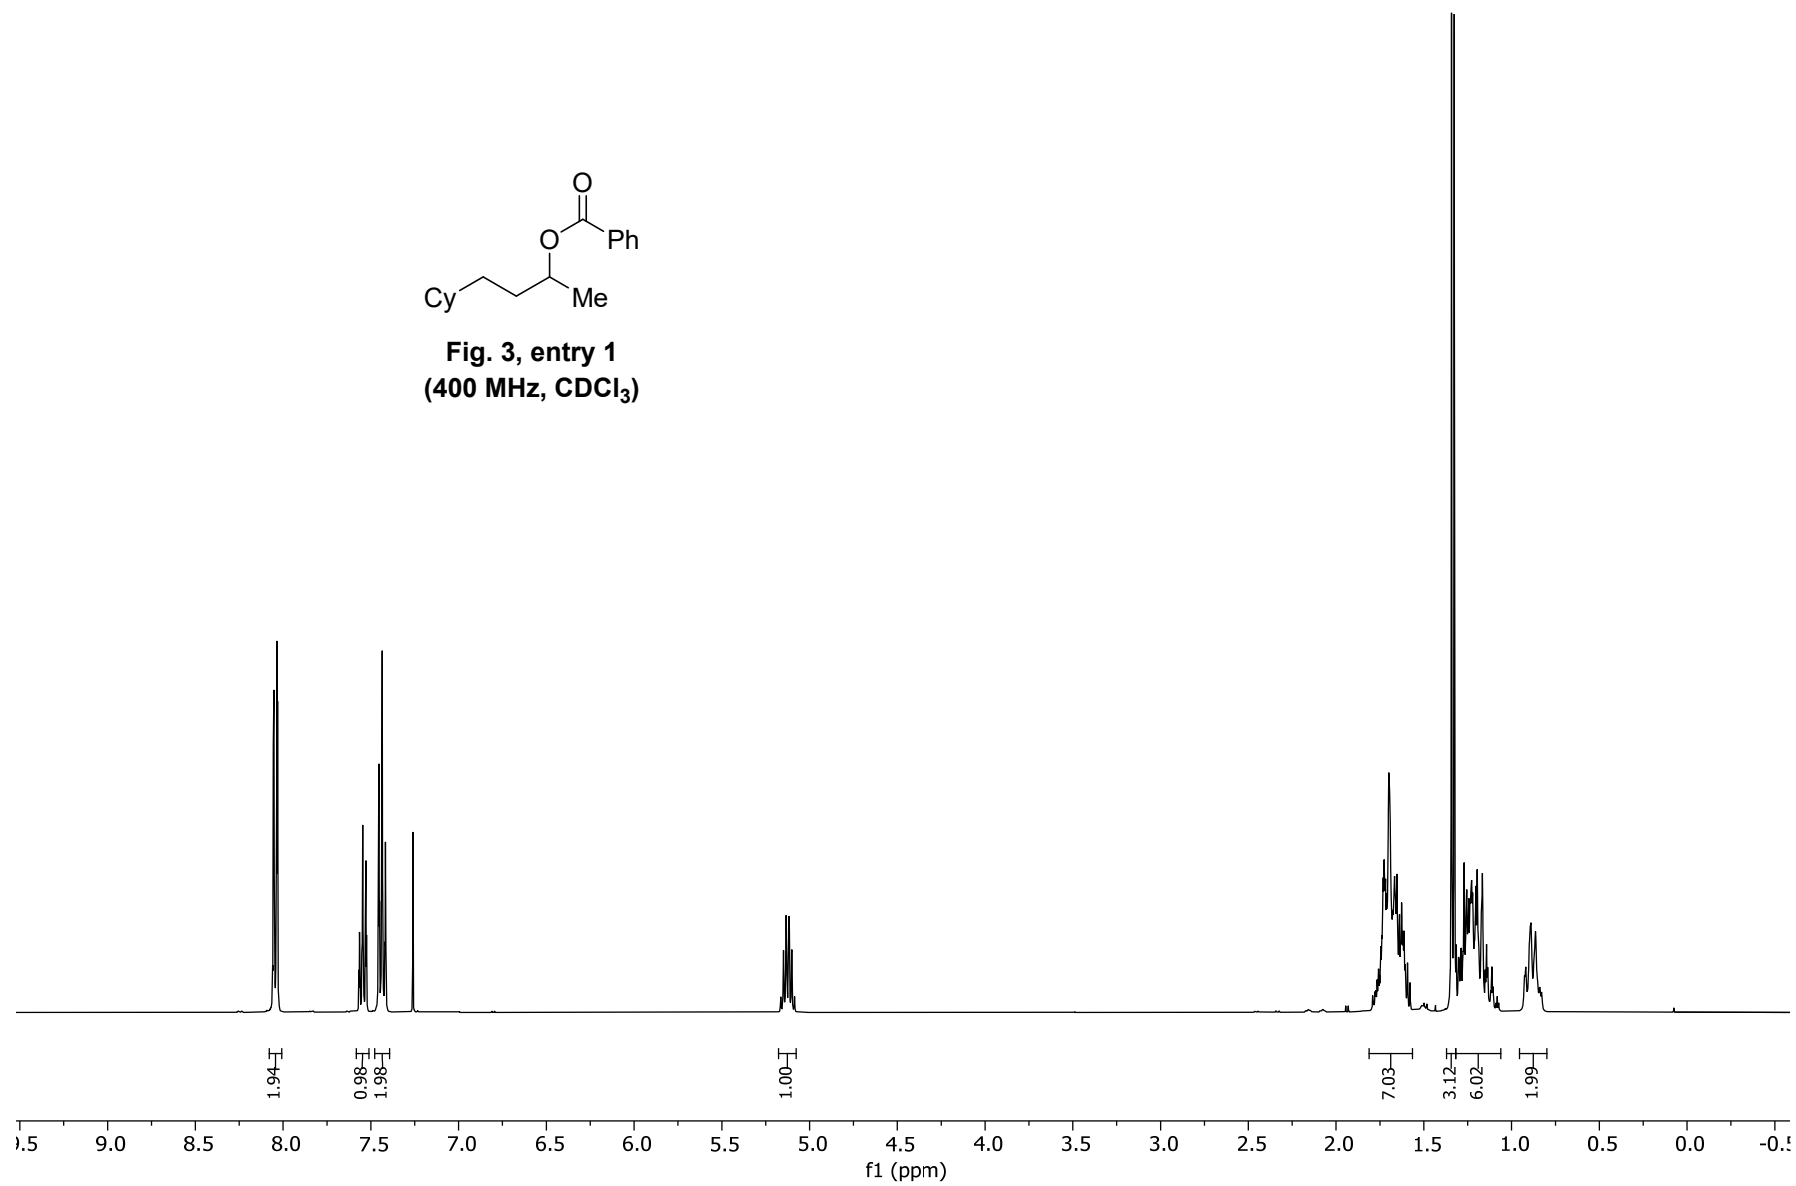

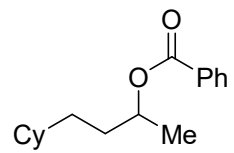

**Fig. 3, entry 1**  
(101 MHz, CDCl<sub>3</sub>)

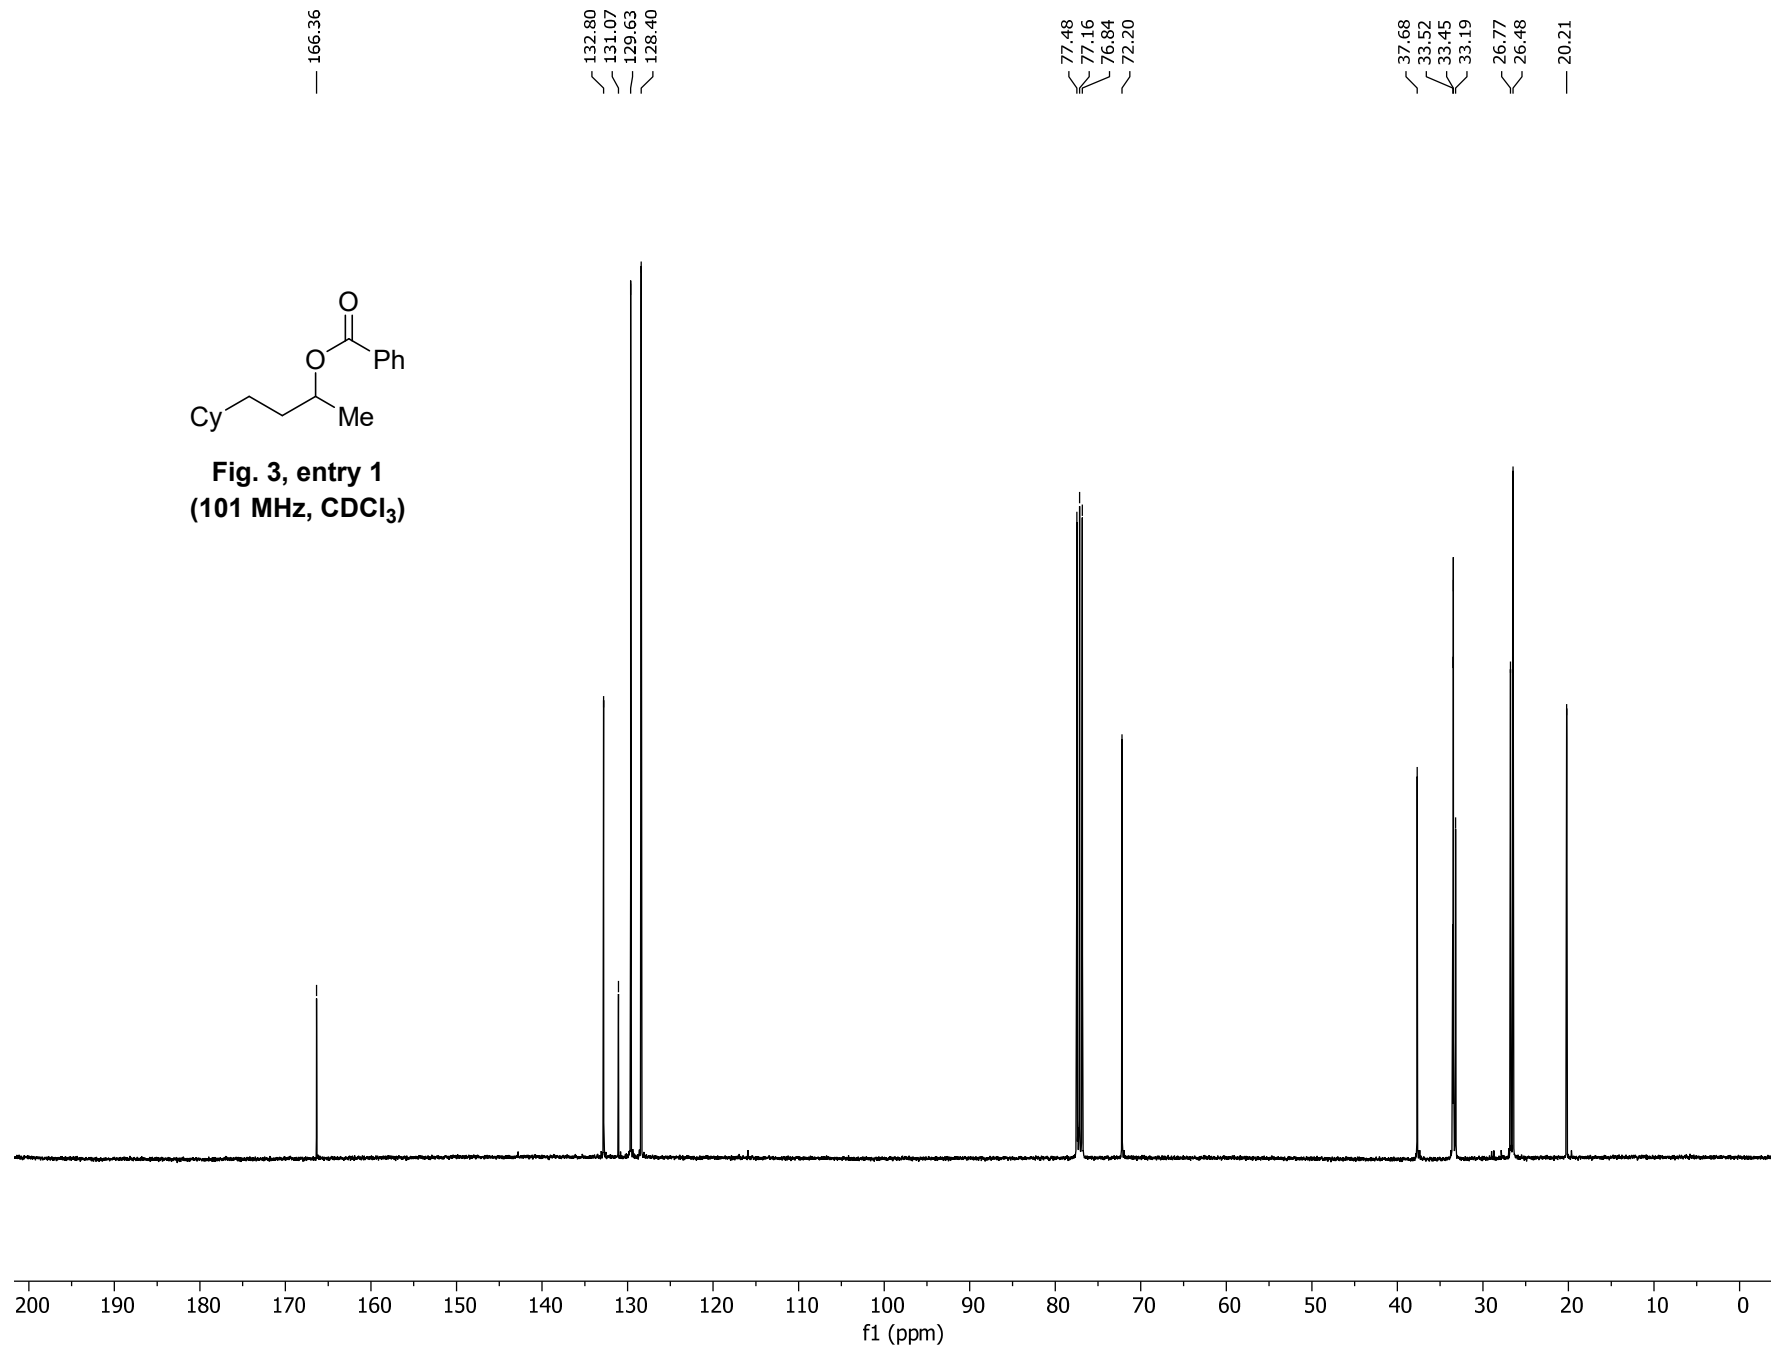

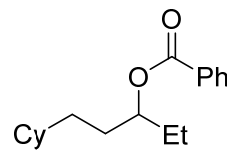

**Fig. 3, entry 2**  
**(400 MHz, CDCl<sub>3</sub>)**

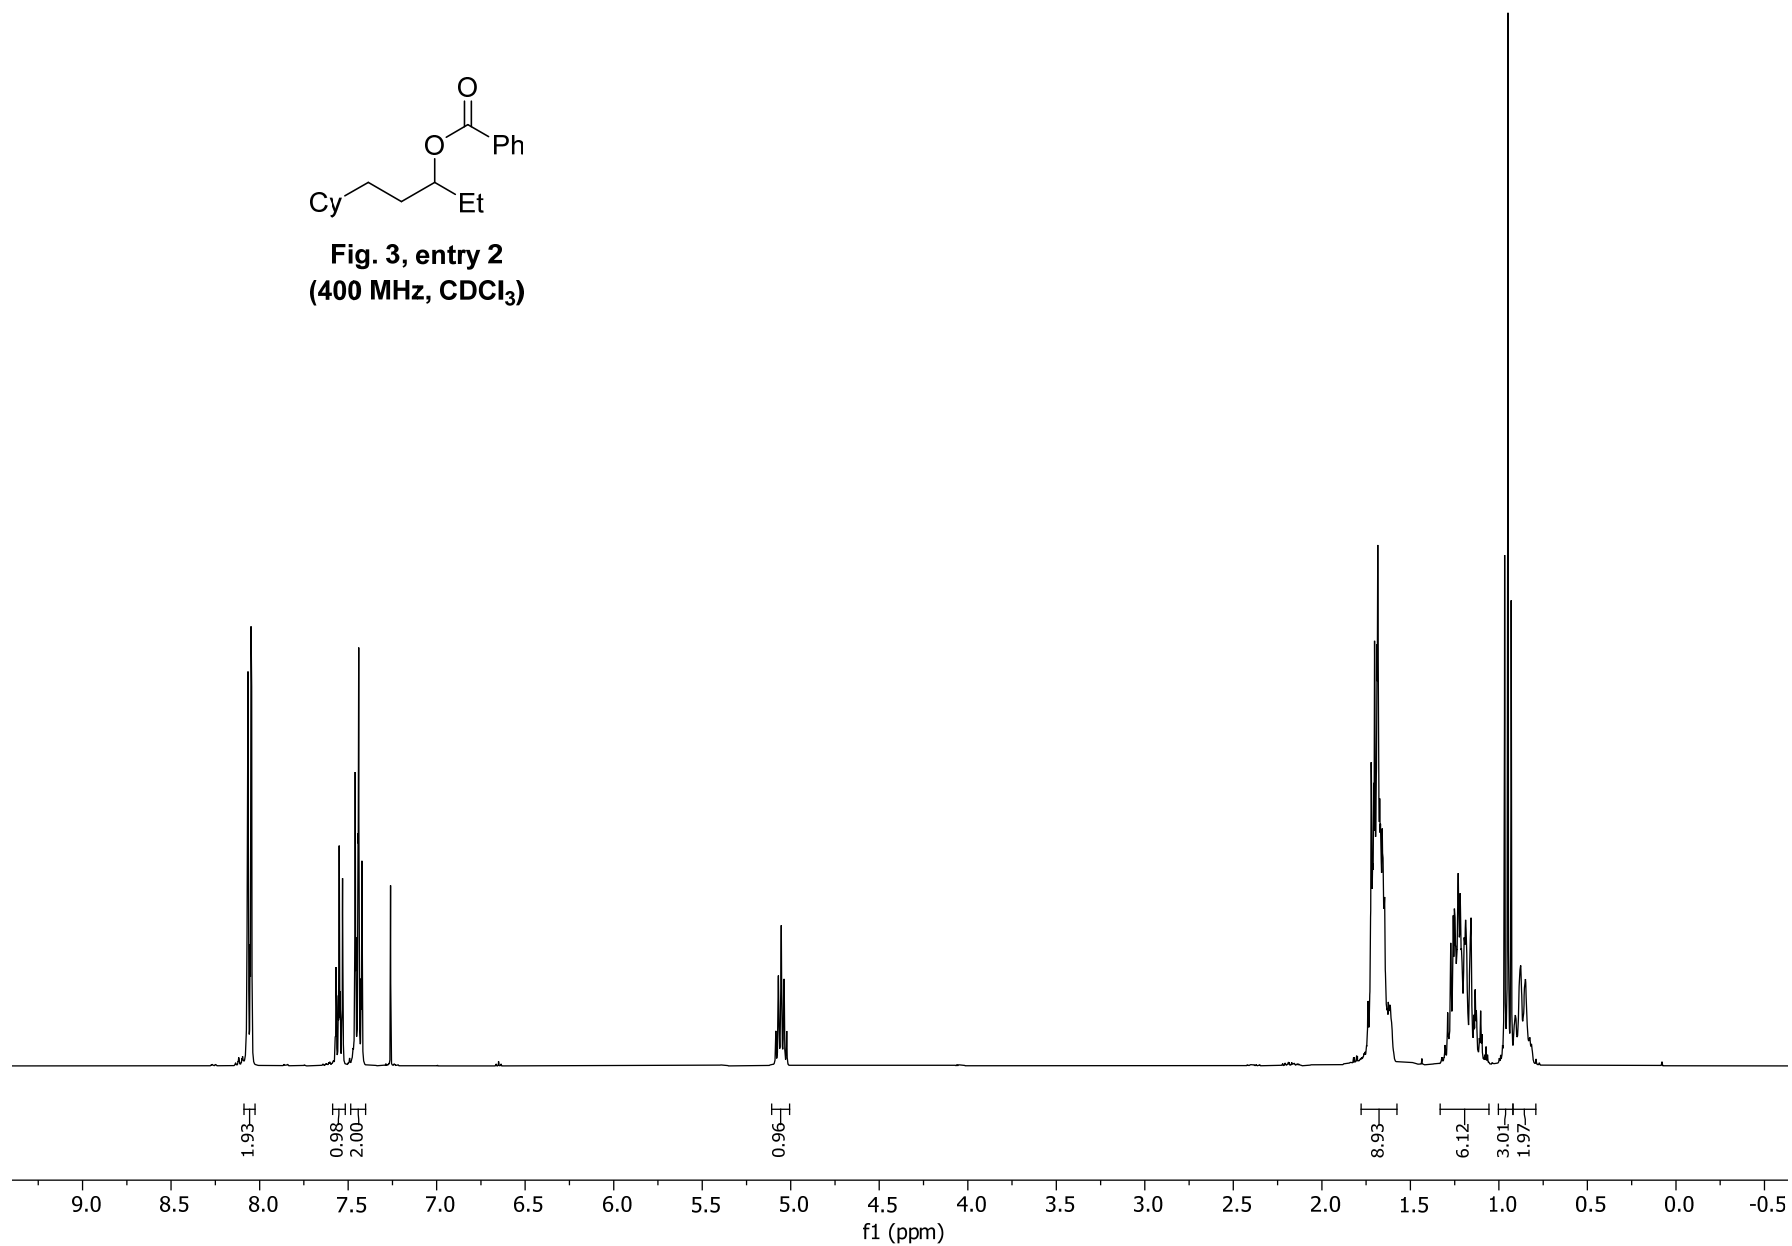

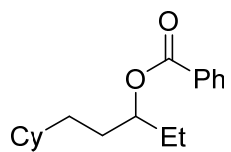

**Fig. 3, entry 2**  
**(101 MHz, CDCl<sub>3</sub>)**

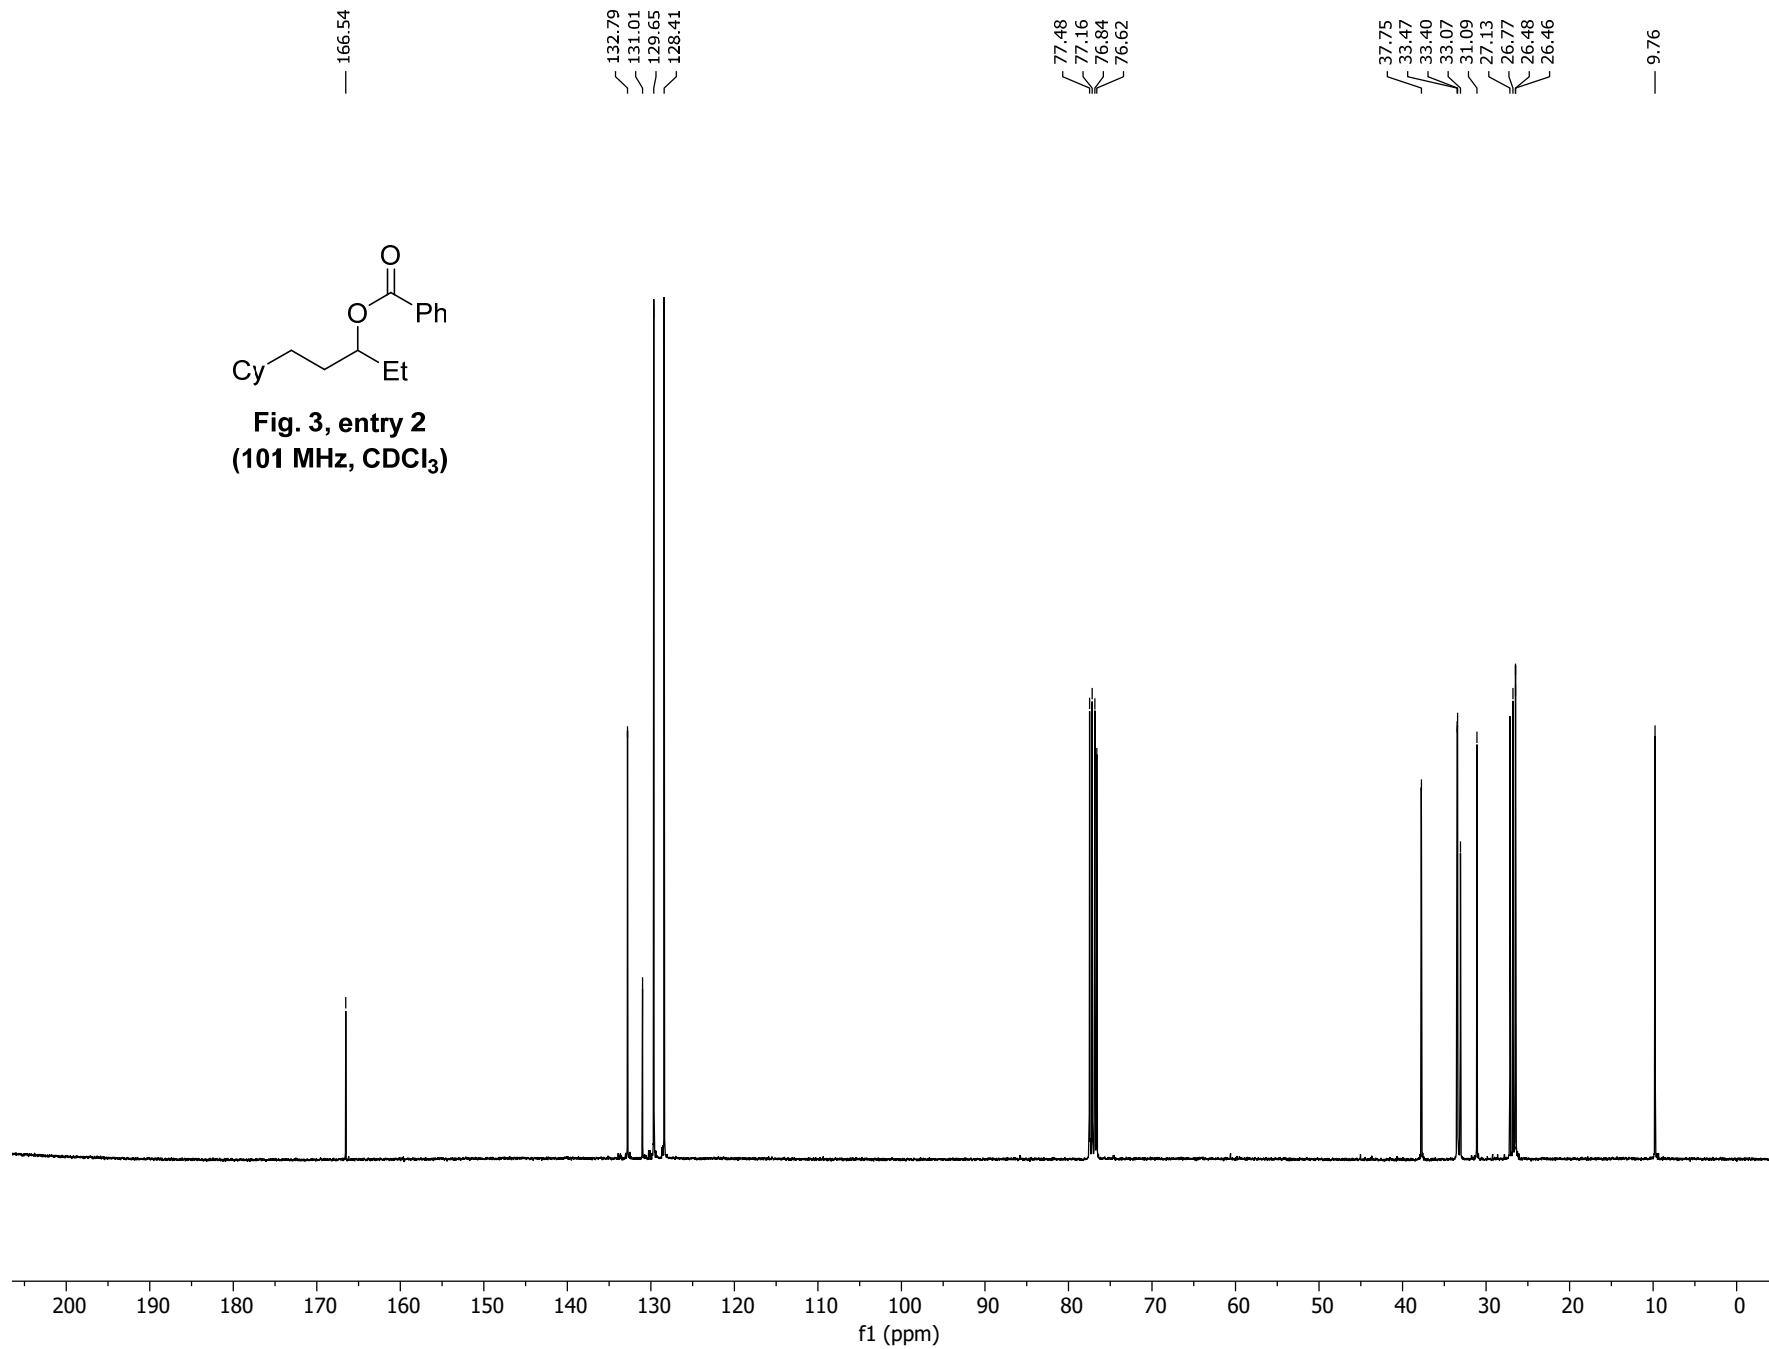

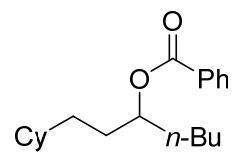

**Fig. 3, entry 3**  
**(400 MHz, CDCl<sub>3</sub>)**

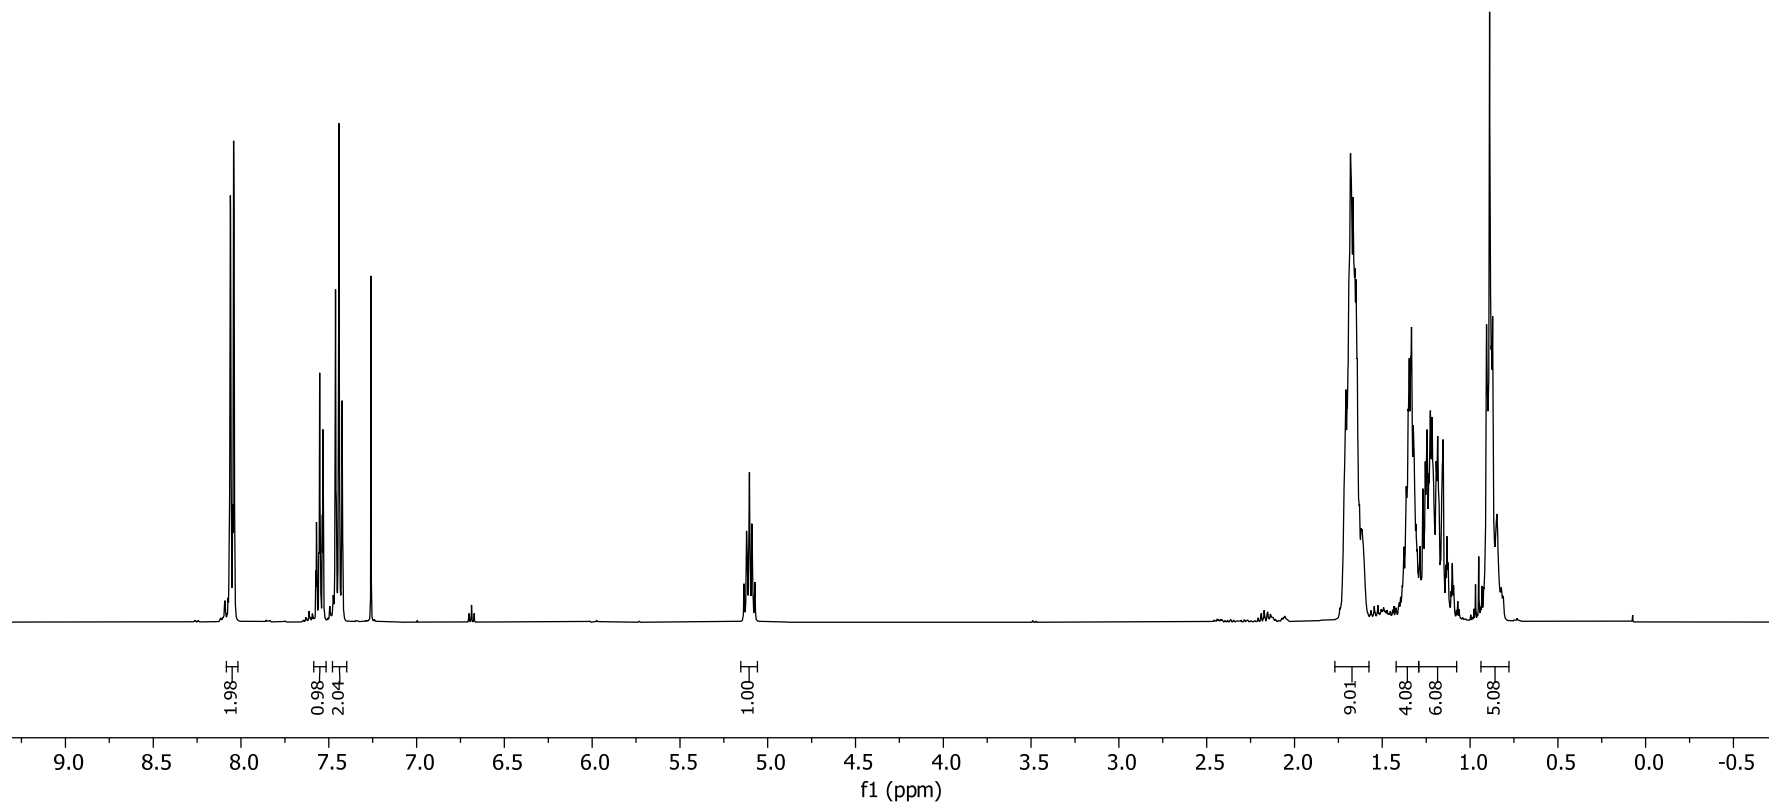

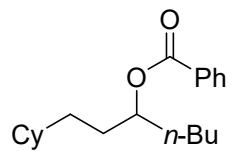

**Fig. 3, entry 3**  
(101 MHz, CDCl<sub>3</sub>)

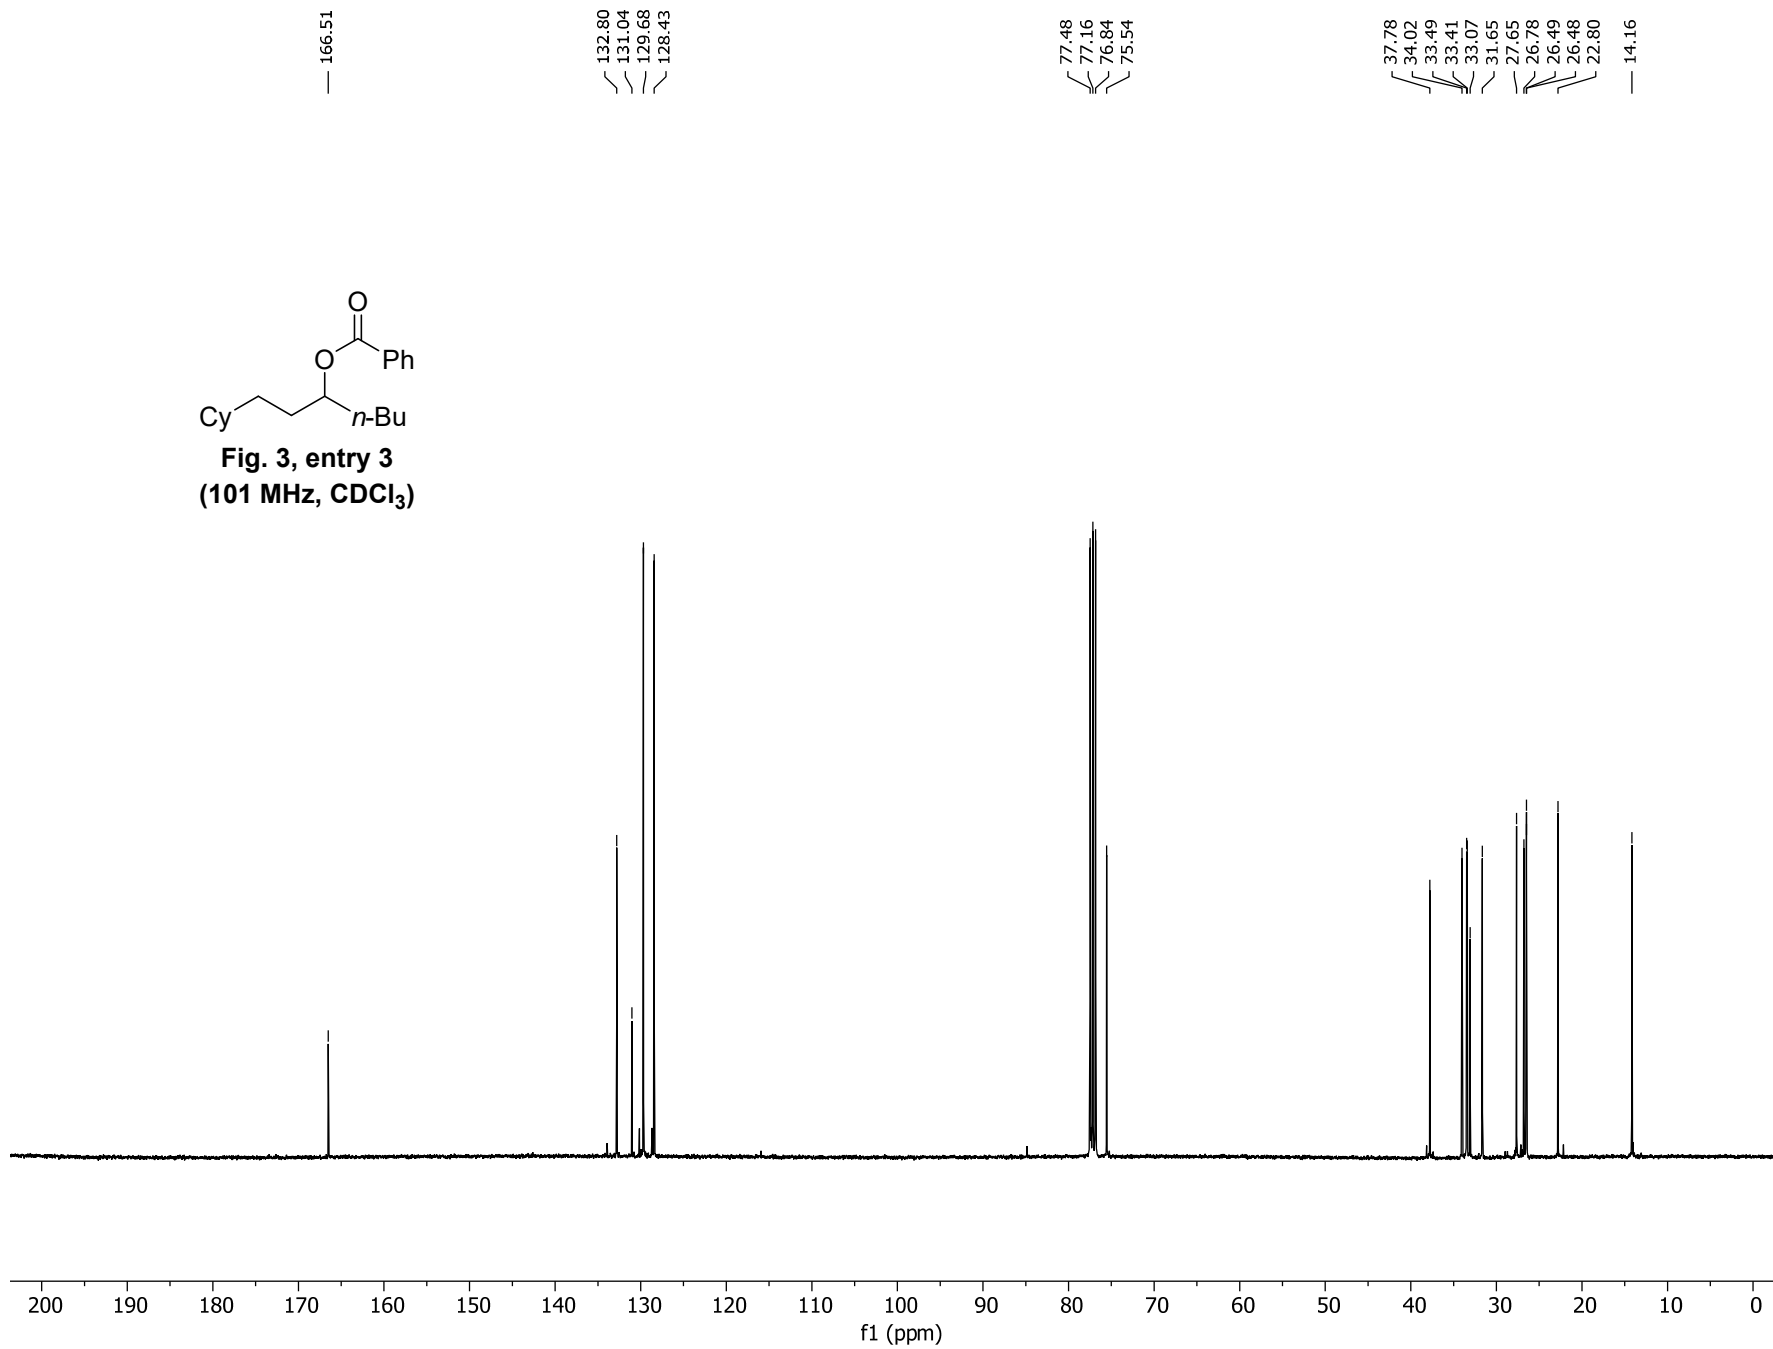

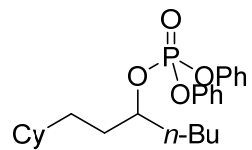

(400 MHz, CDCl<sub>3</sub>)

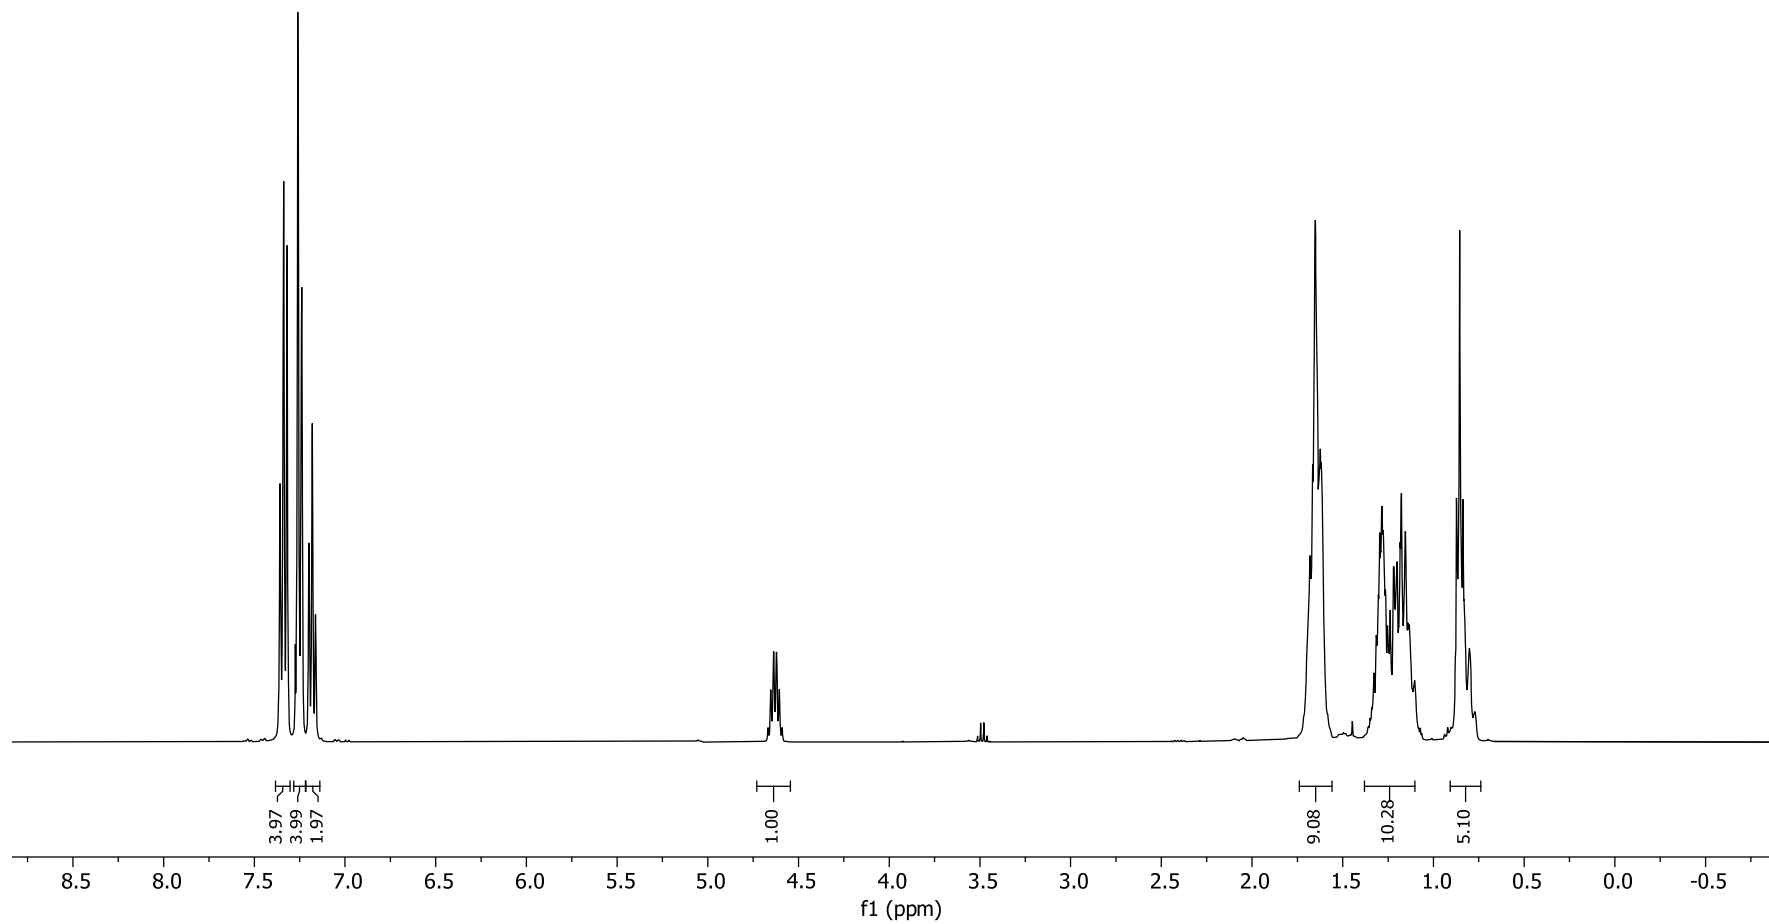

S-56



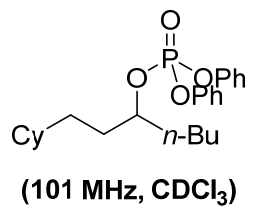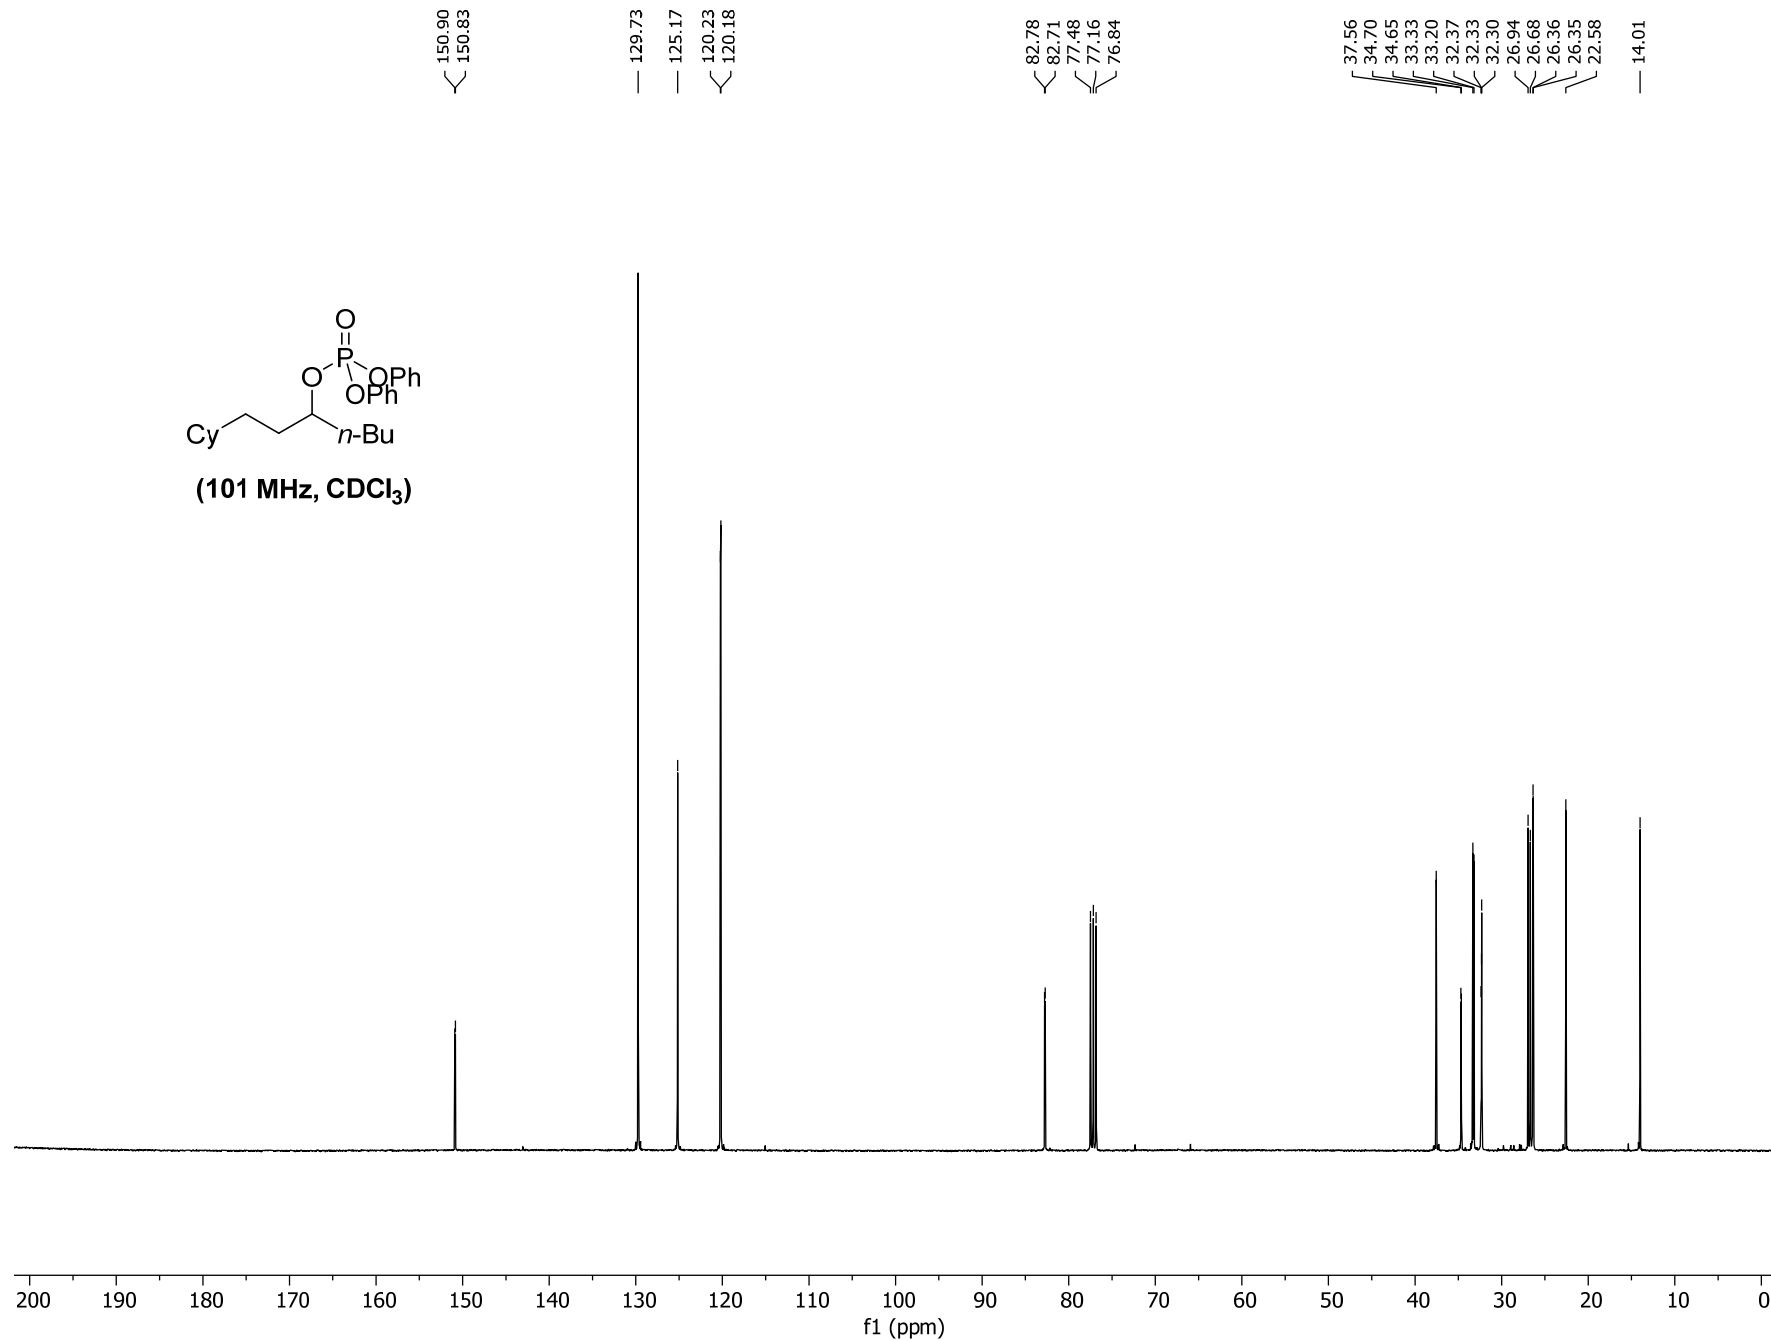

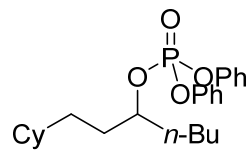

(162 MHz, CDCl<sub>3</sub>)

— -12.37

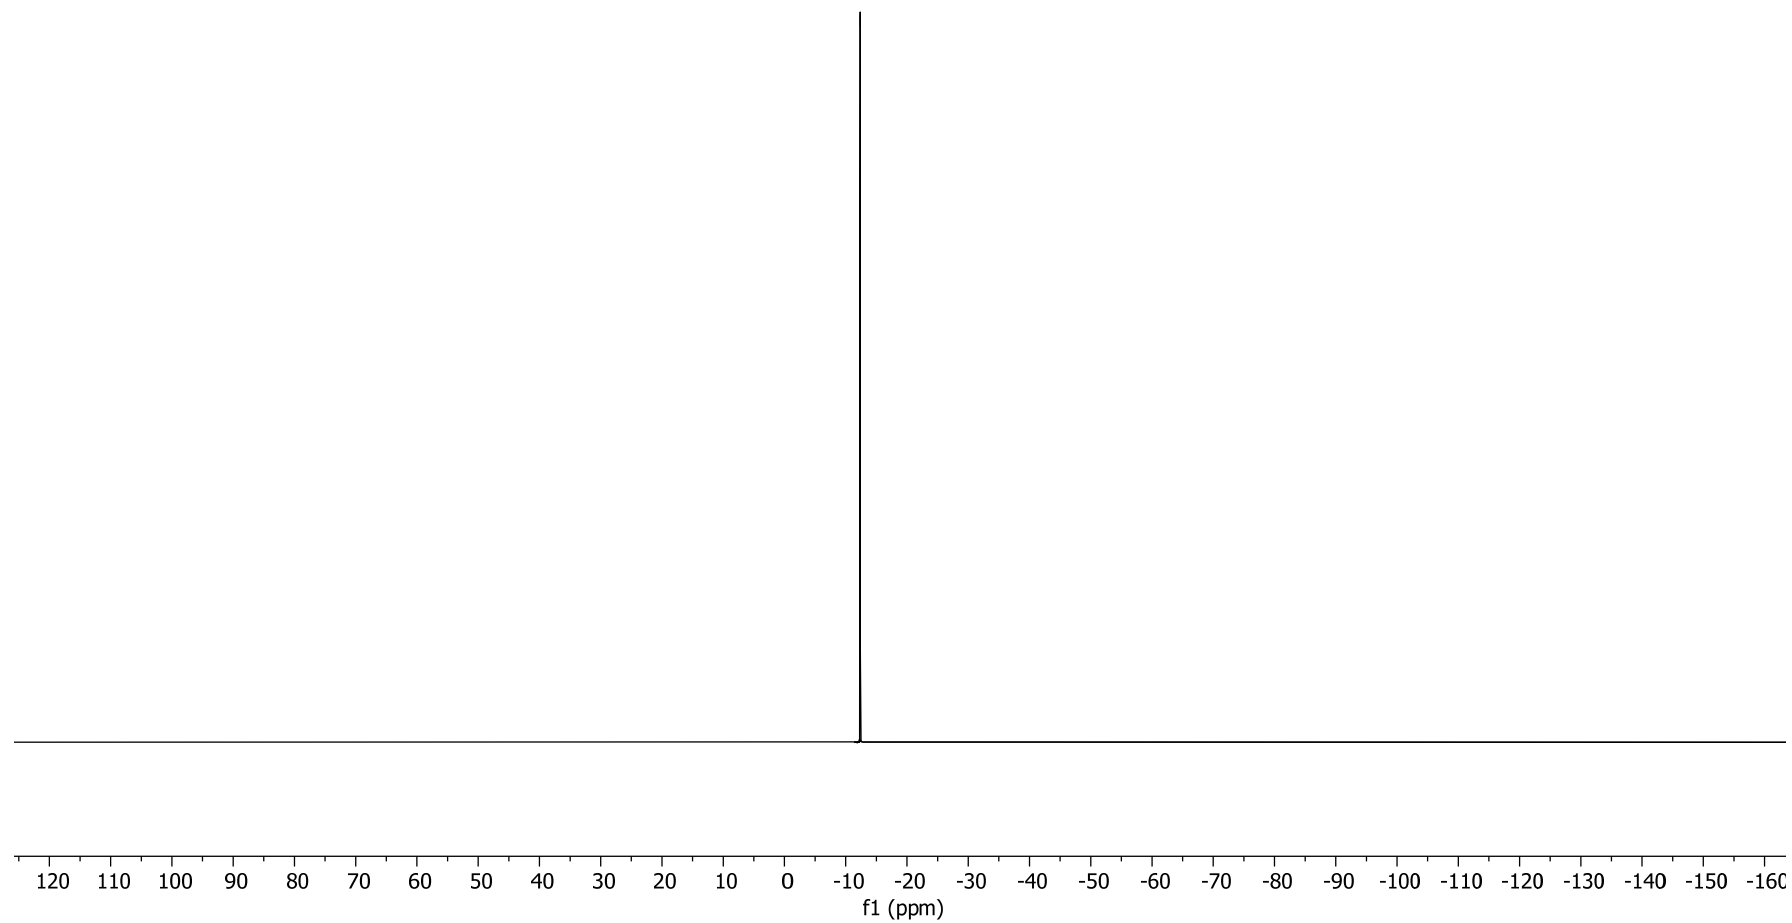

S-58

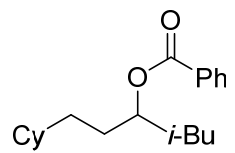

**Fig. 3, entry 4**  
**(400 MHz, CDCl<sub>3</sub>)**

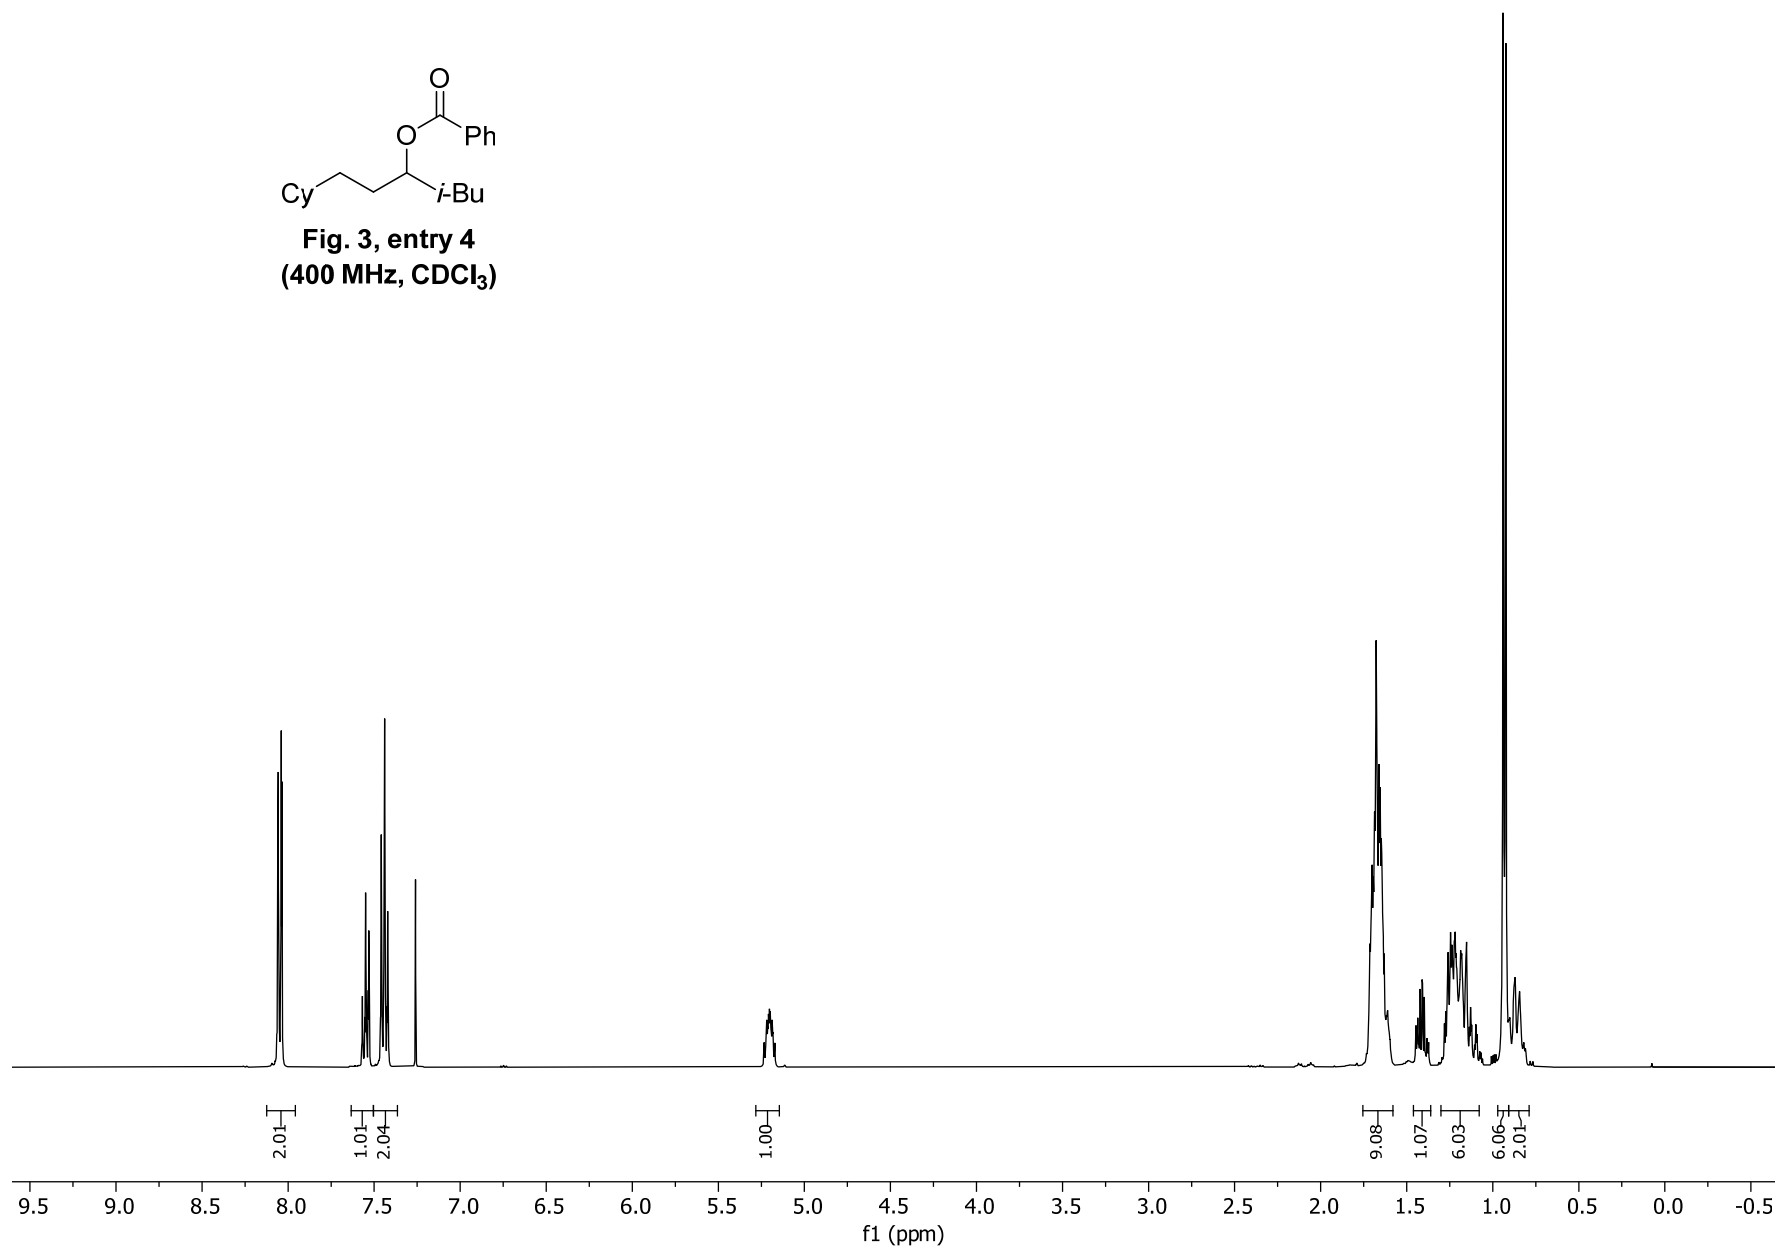

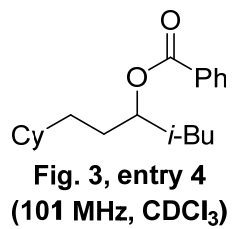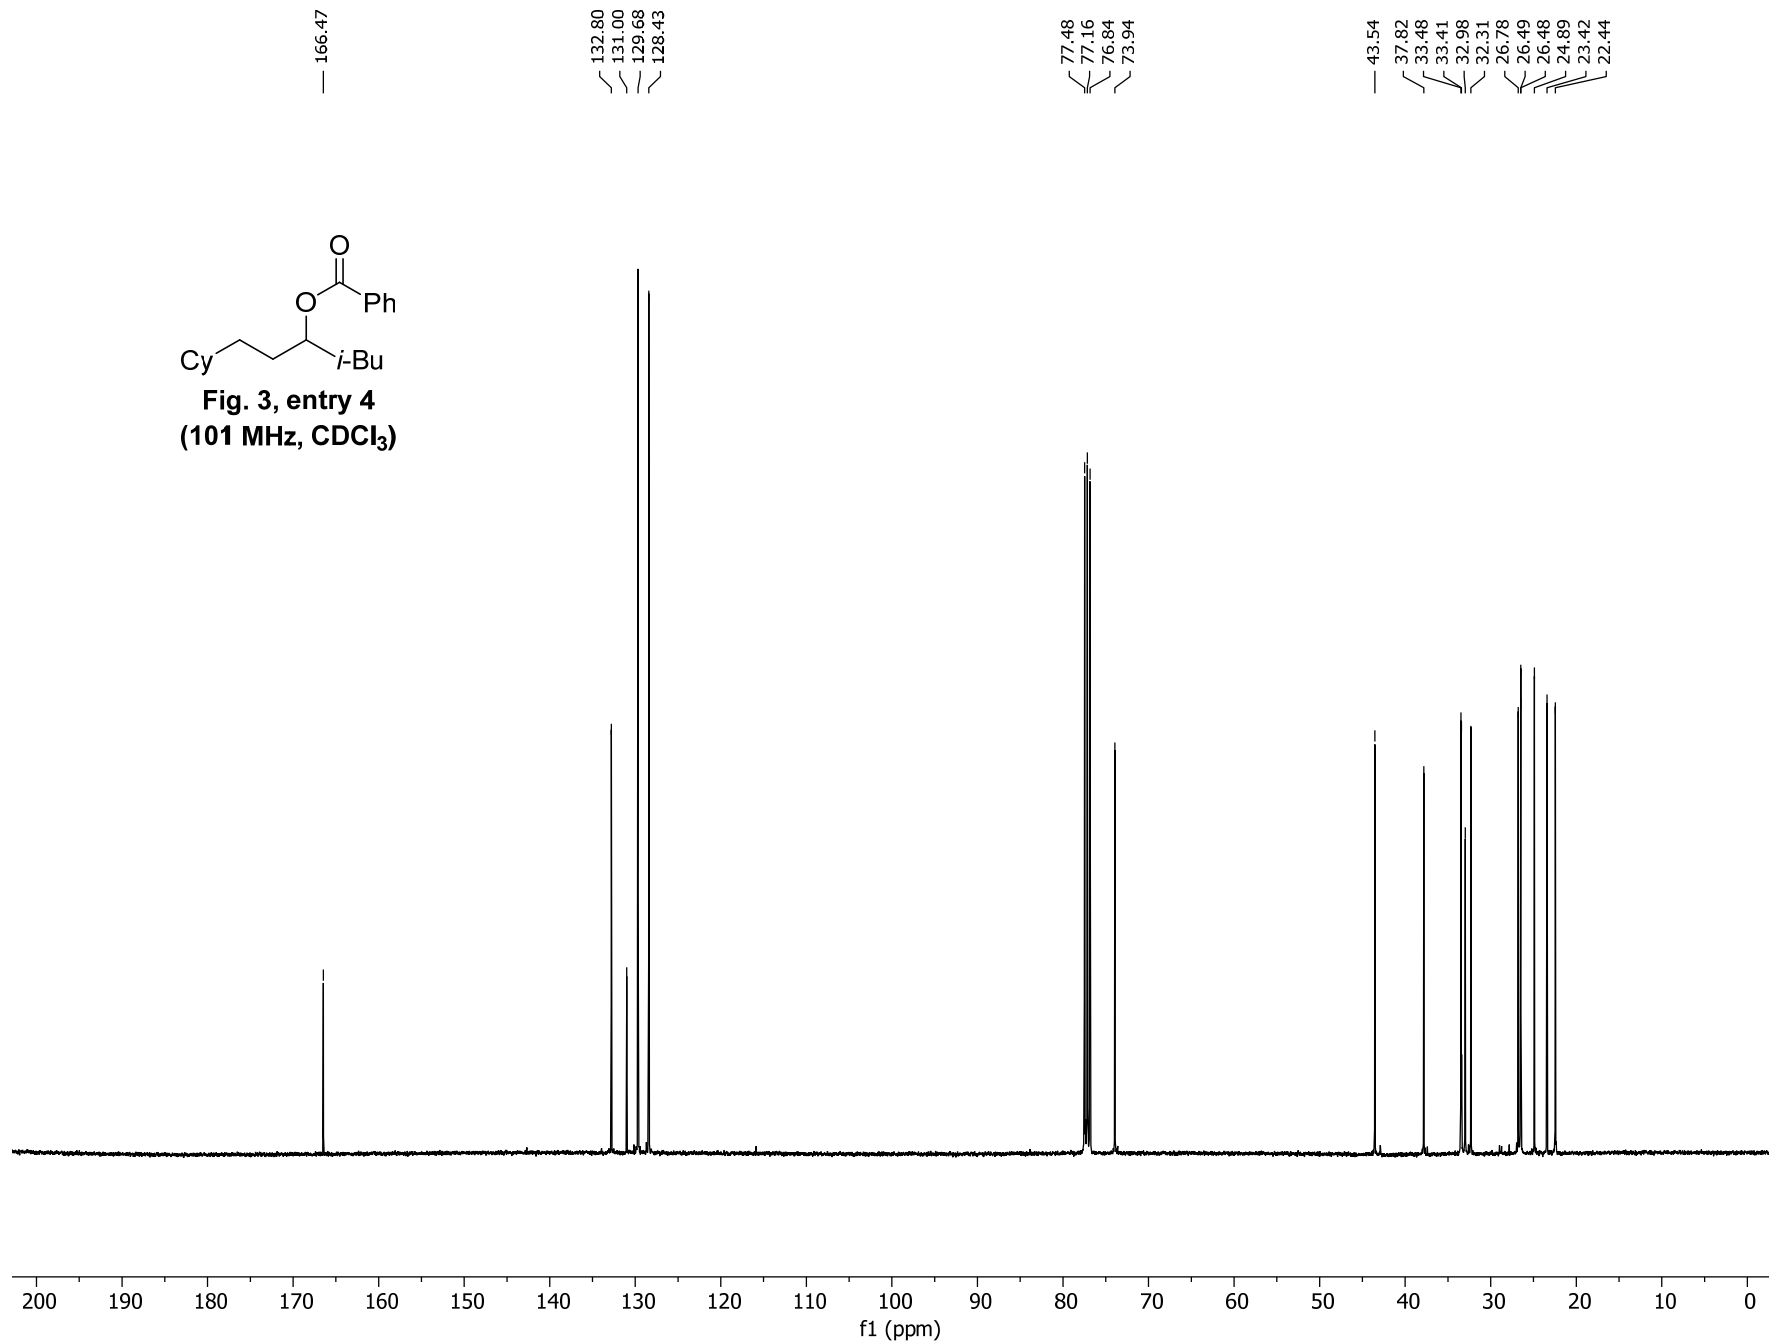

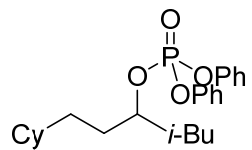

(400 MHz, CDCl<sub>3</sub>)

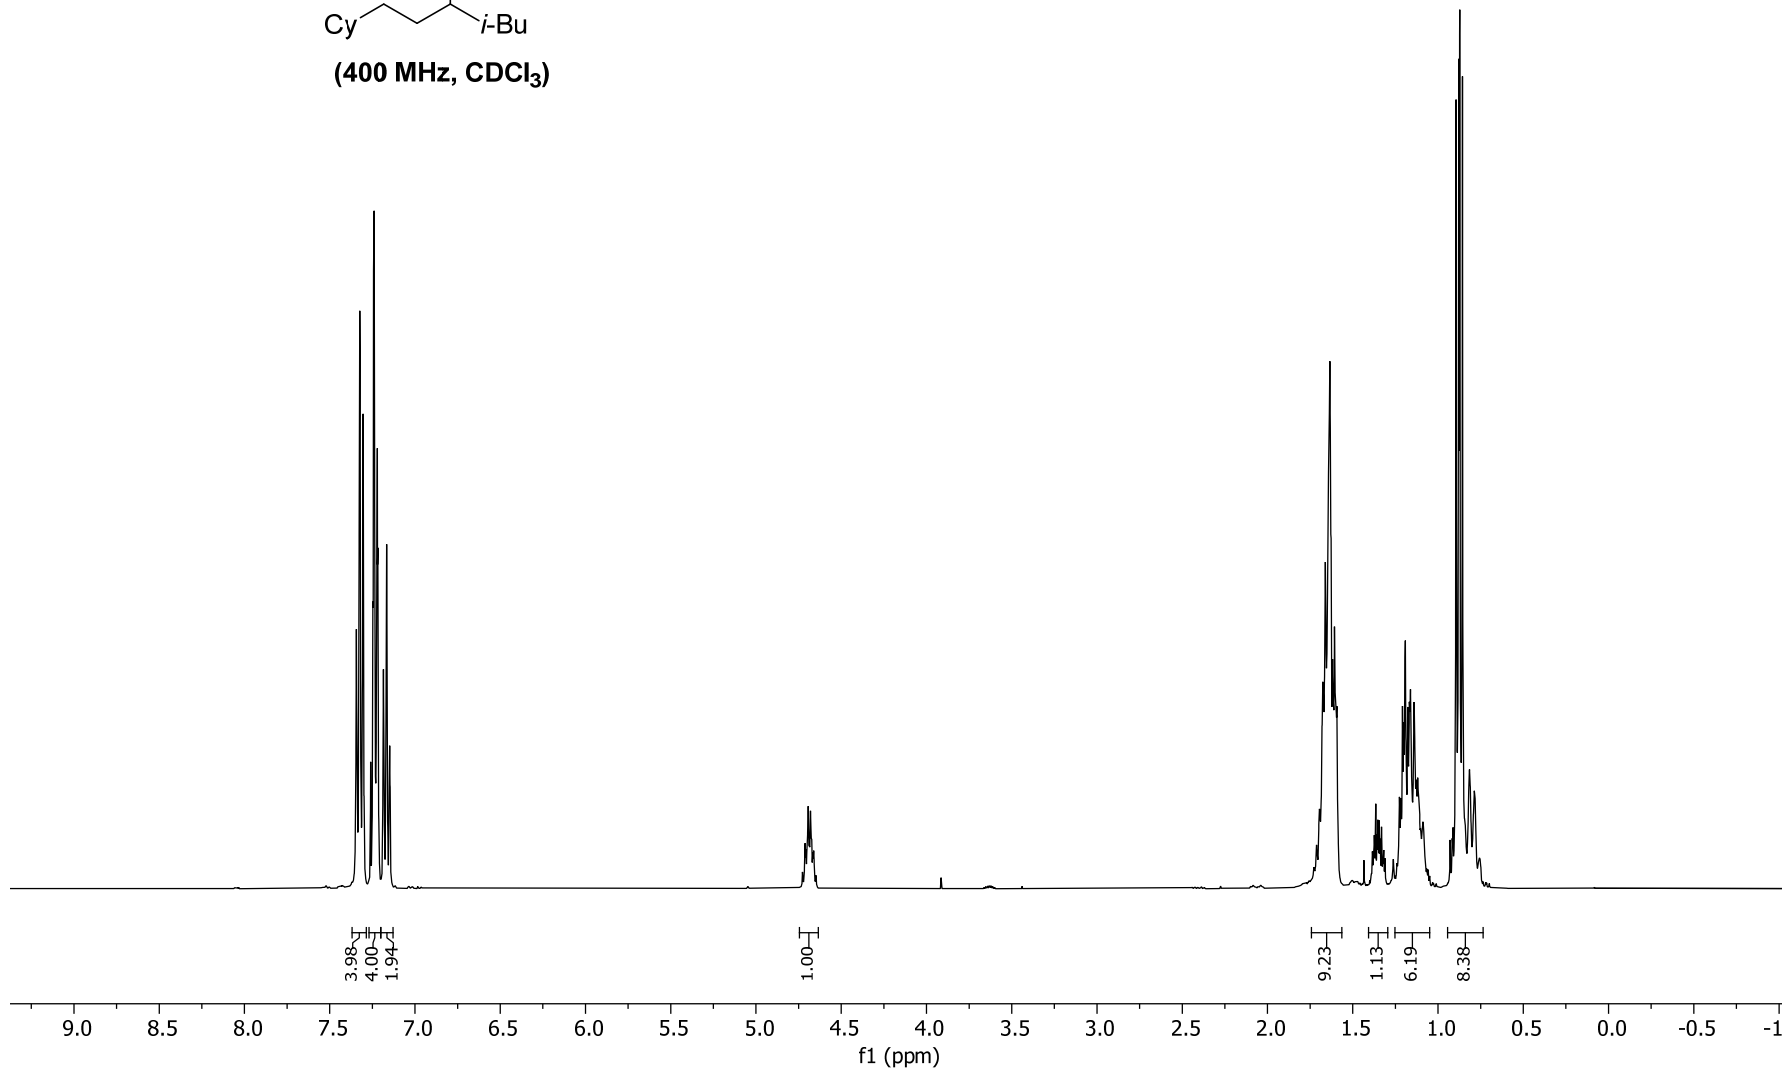

S-61

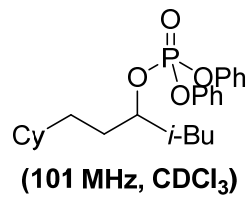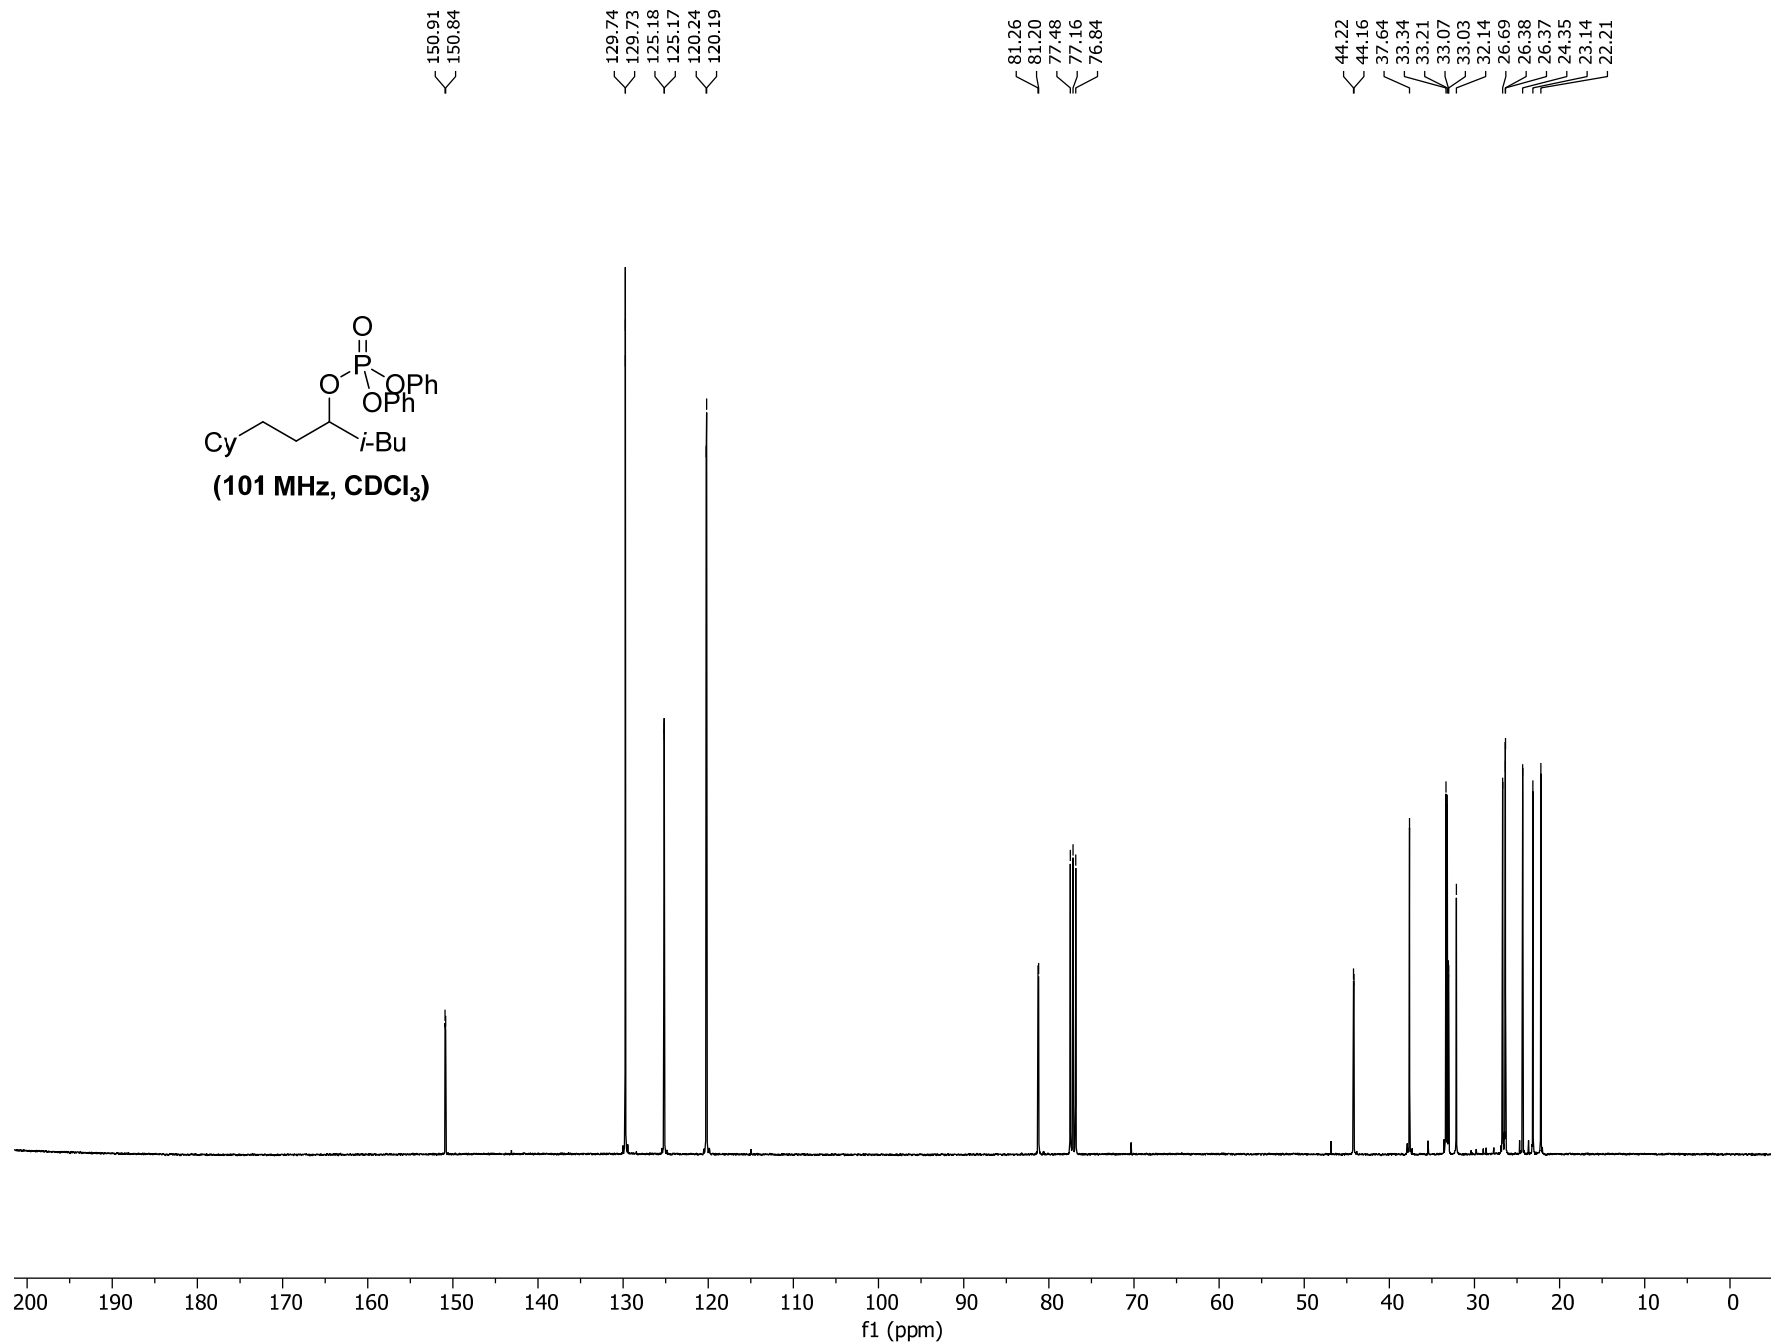

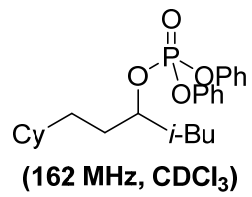

— -12.40

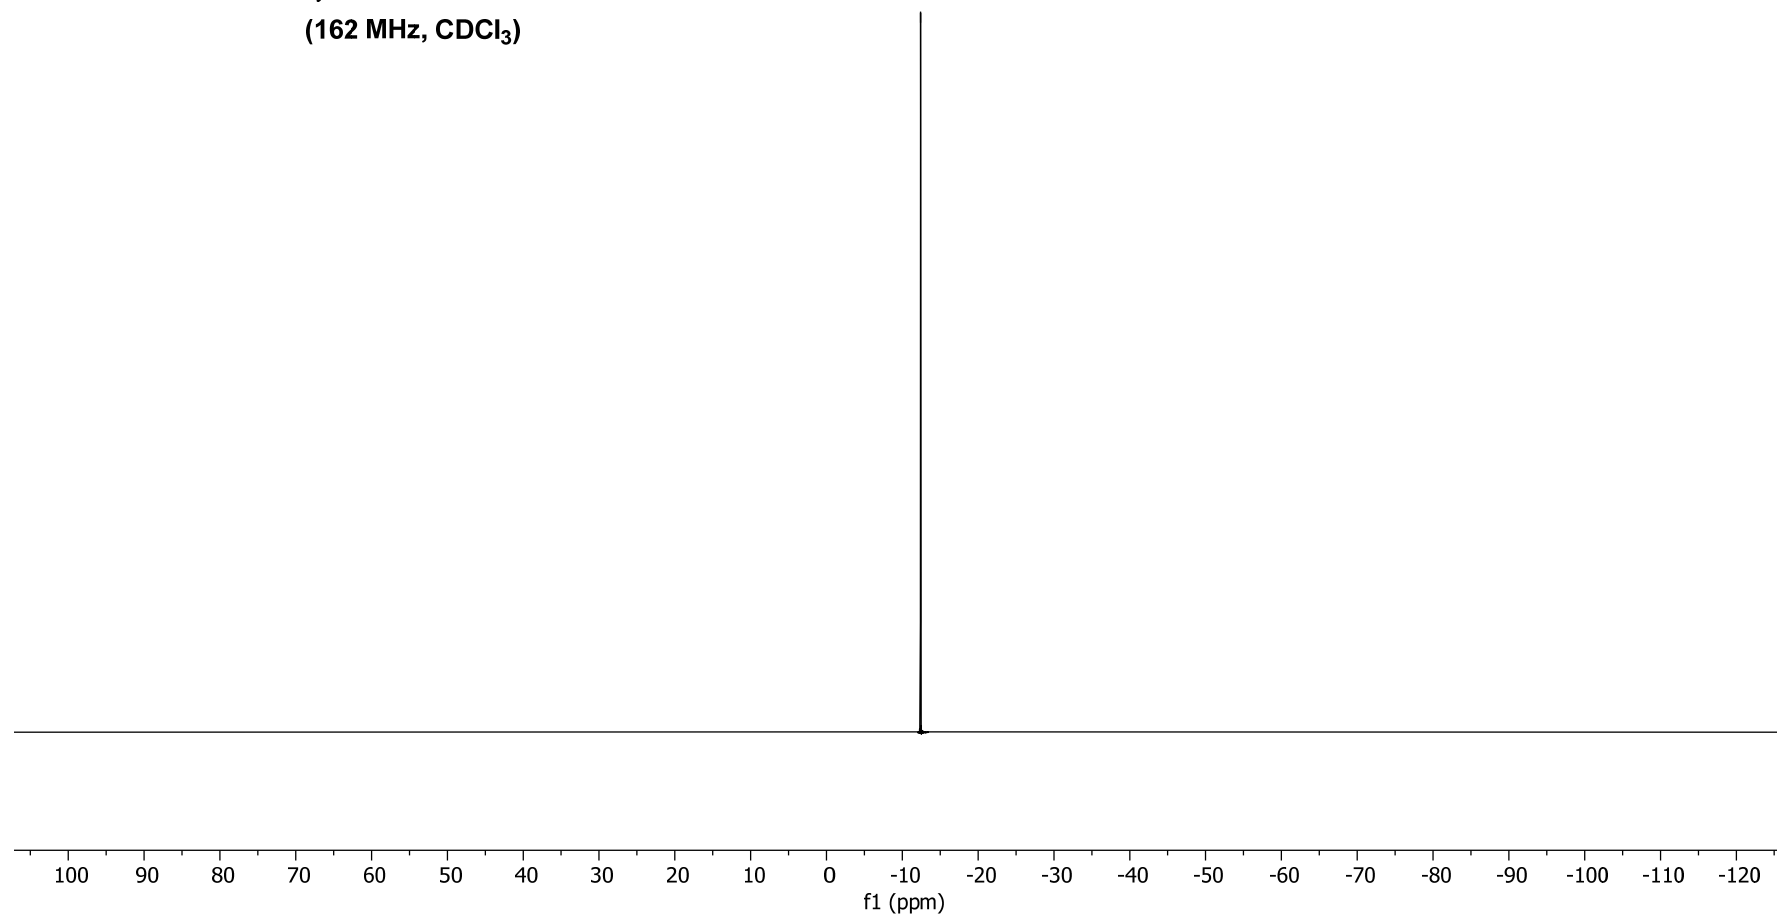

S-63

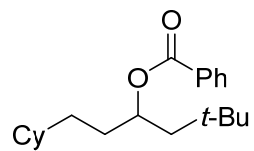

**Fig. 3, entry 5**  
**(400 MHz, CDCl<sub>3</sub>)**

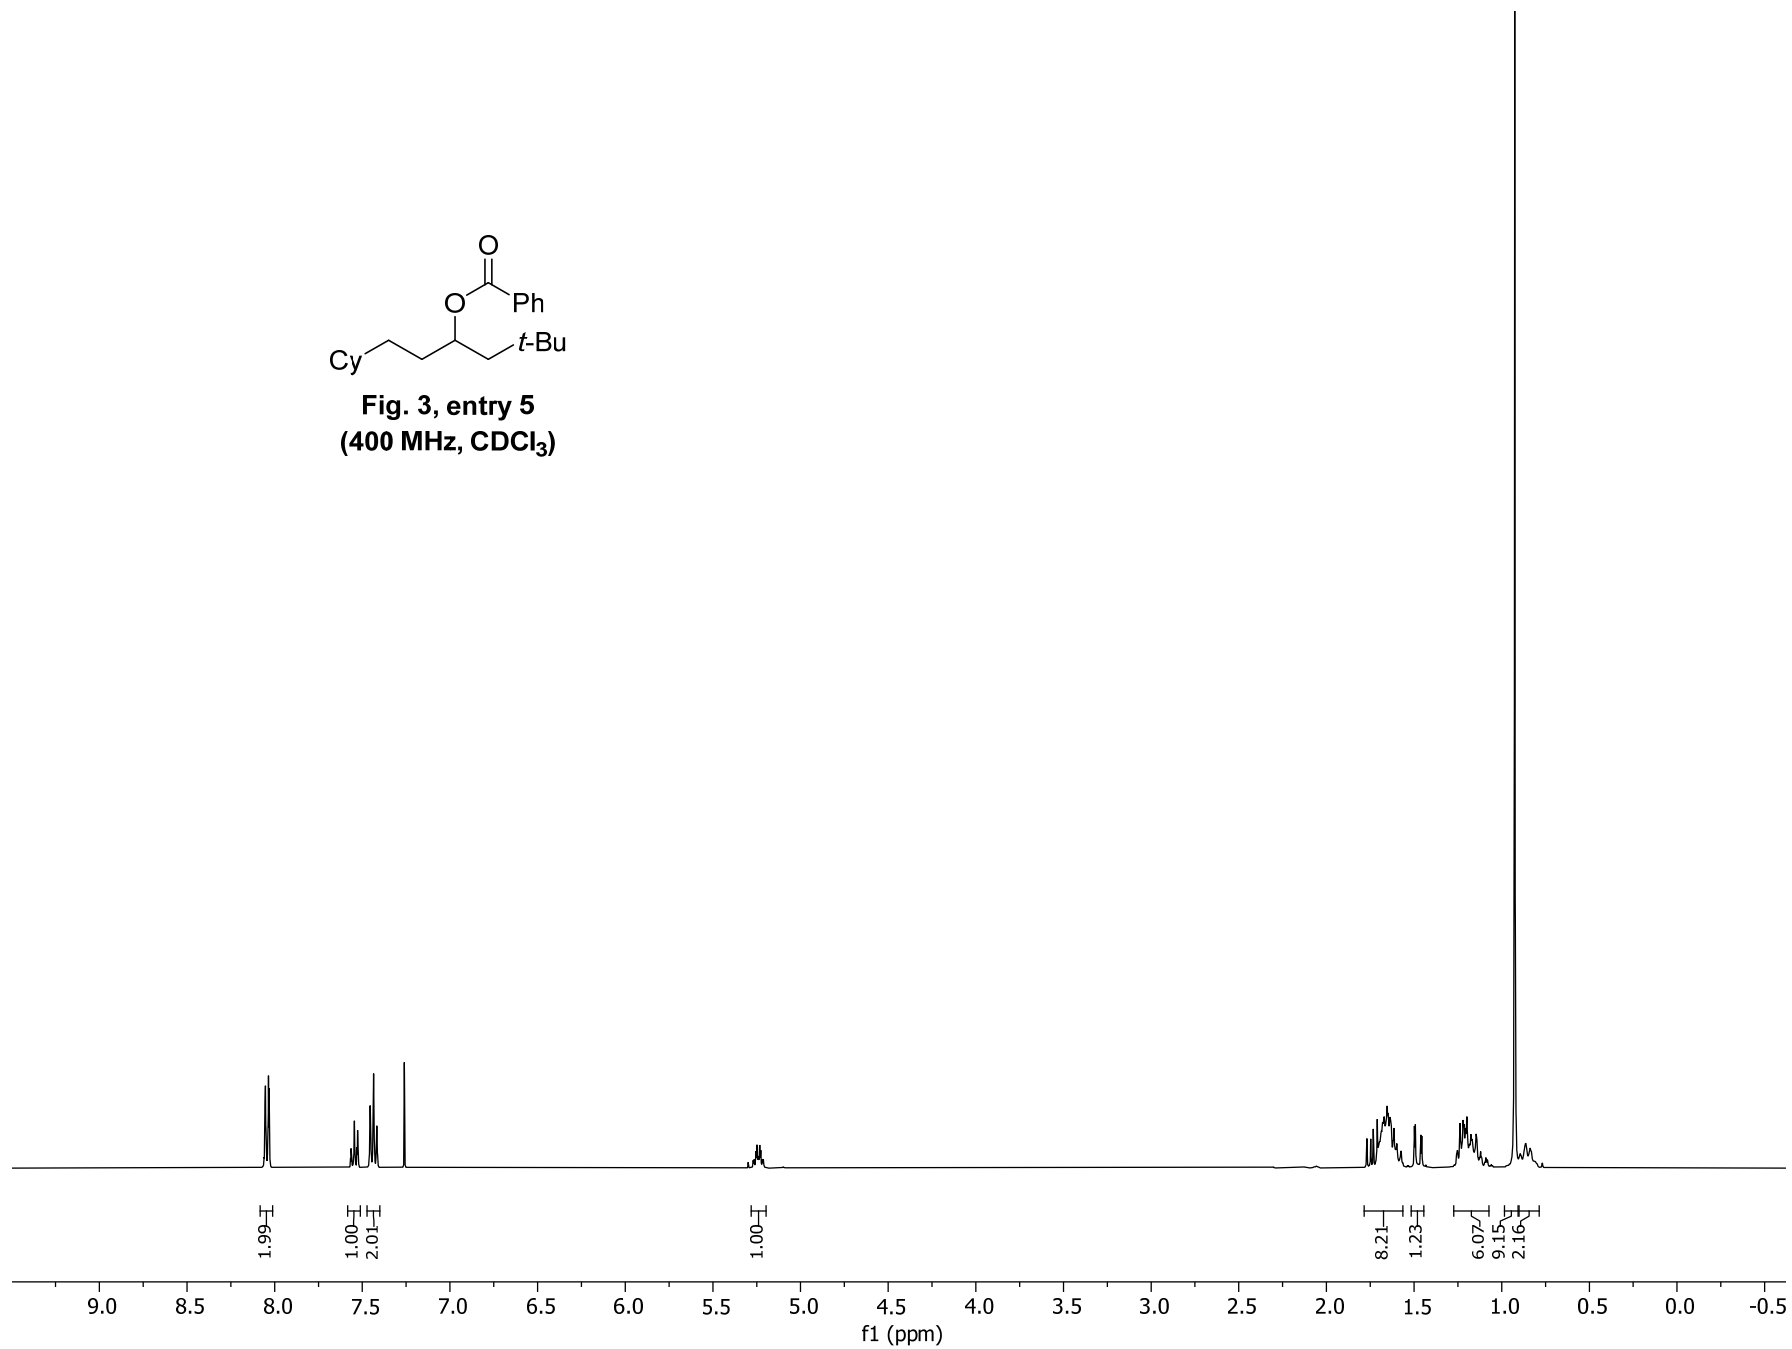



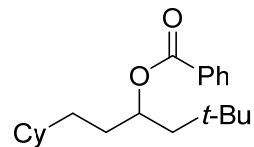

**Fig. 3, entry 5**  
(101 MHz, CDCl<sub>3</sub>)

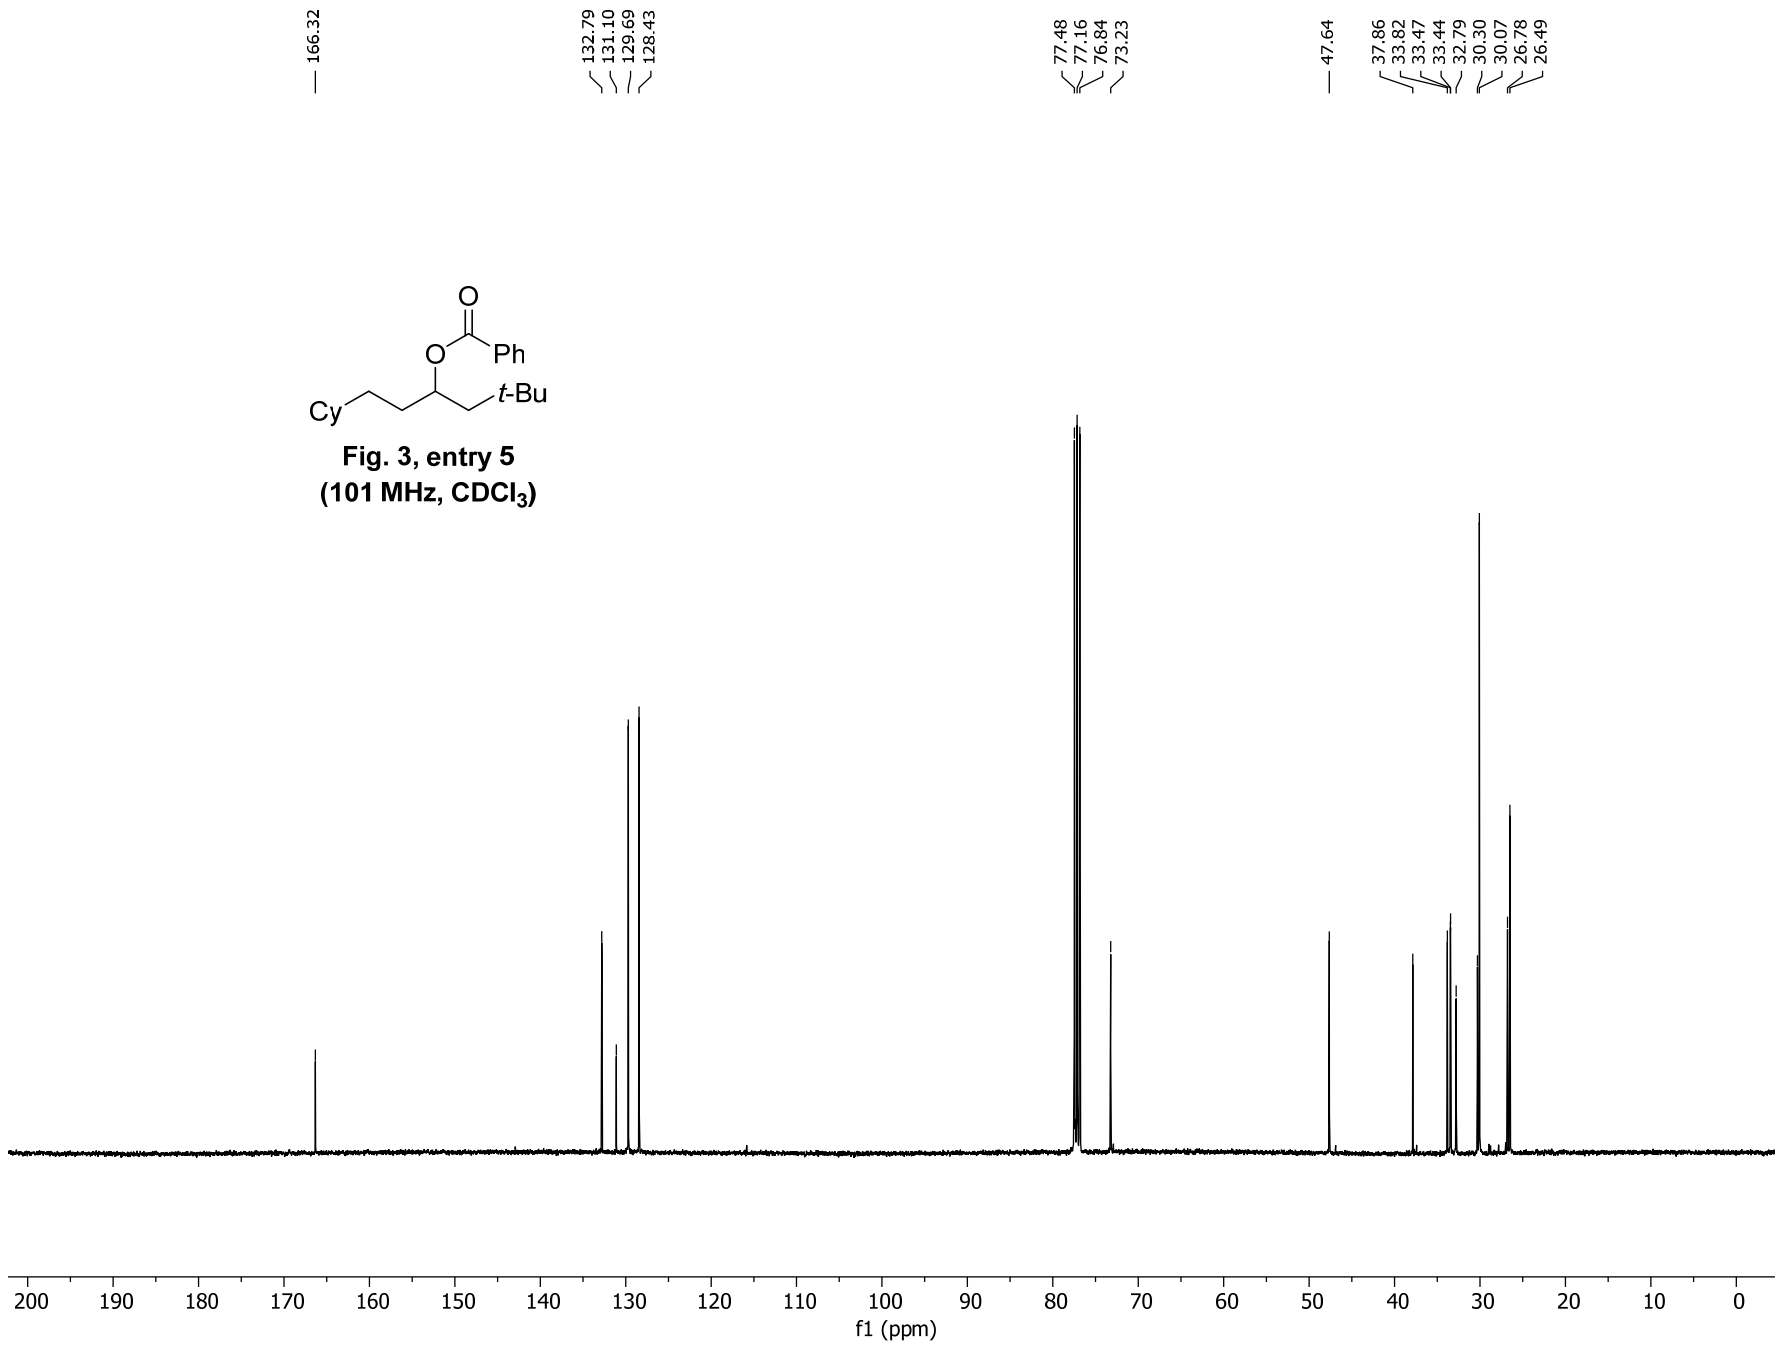

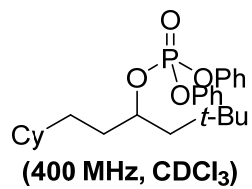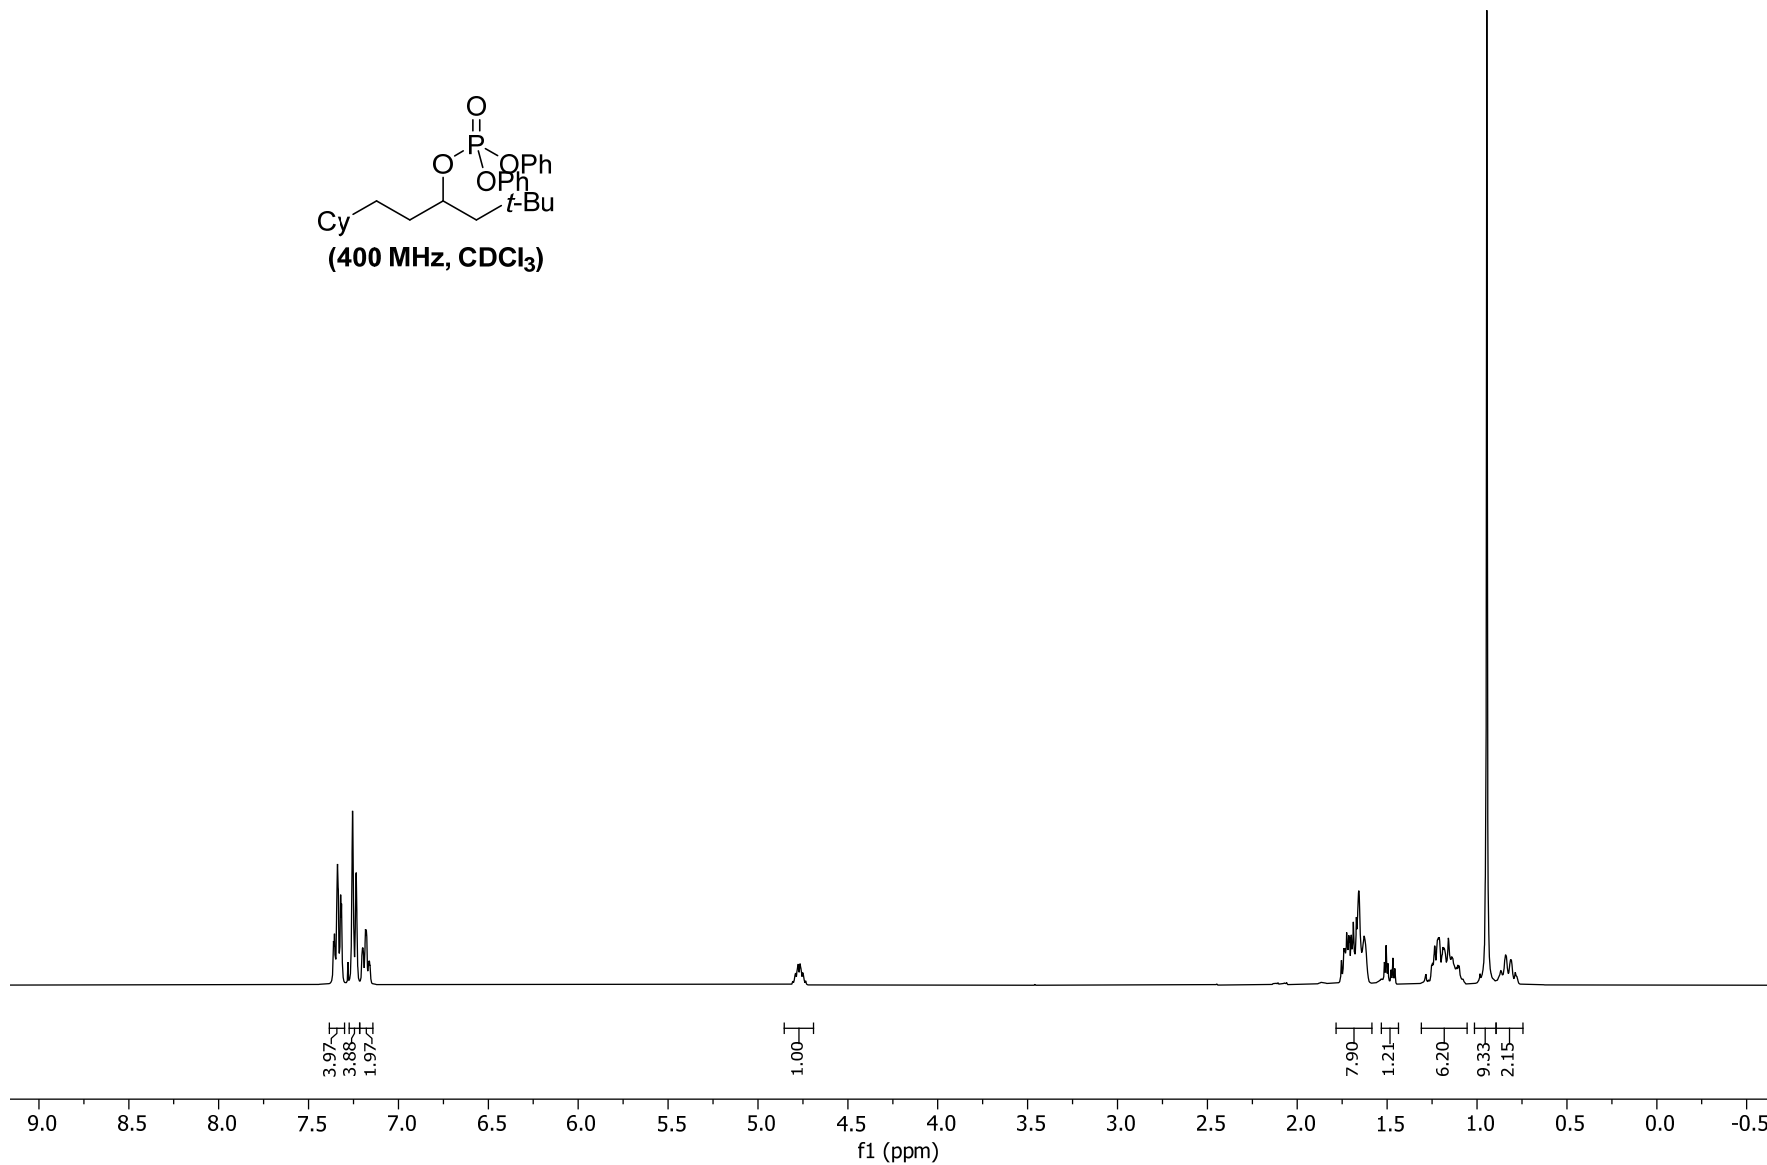

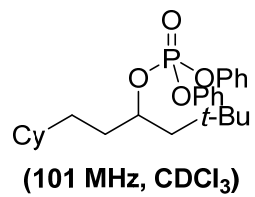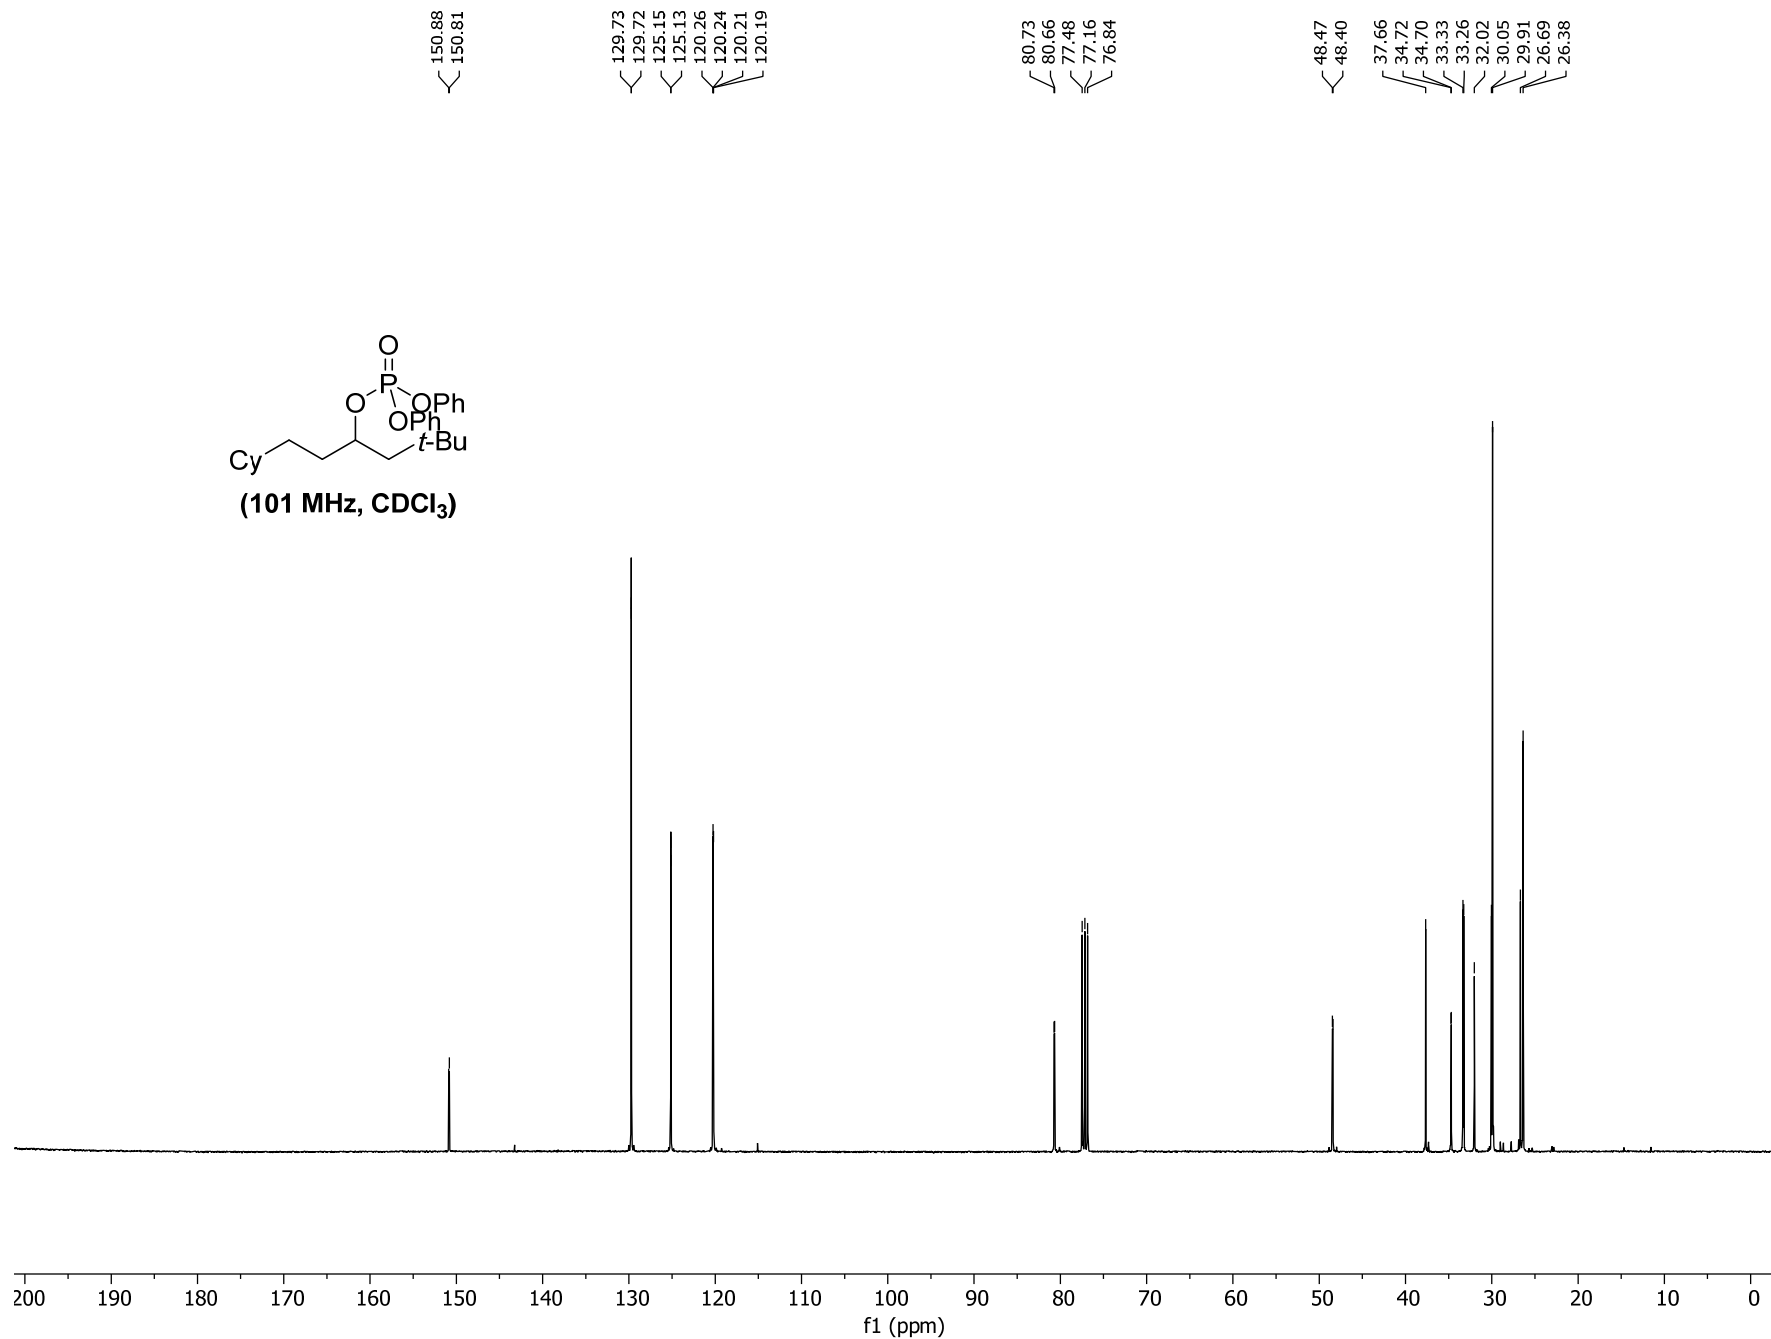

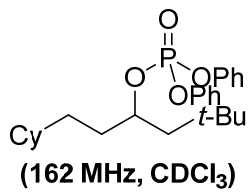

-12.89

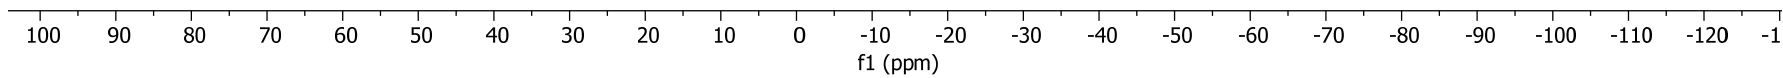

S-68

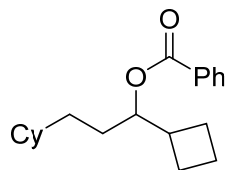

**Fig. 3, entry 6**  
**(400 MHz, CDCl<sub>3</sub>)**

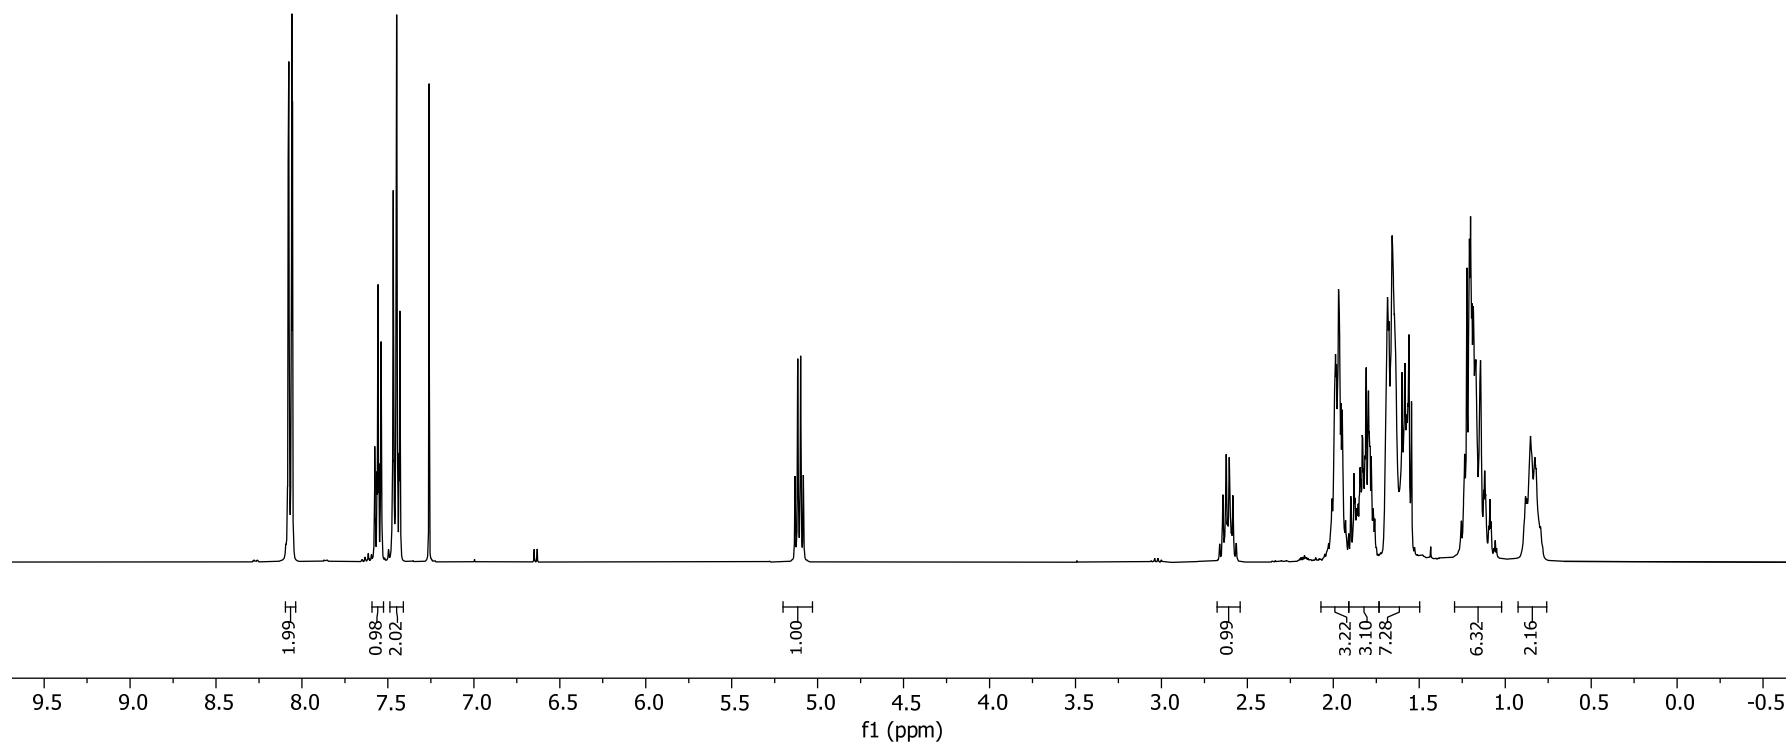

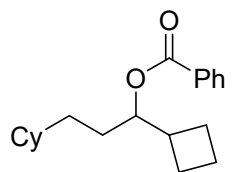

**Fig. 3, entry 6**  
(101 MHz, CDCl<sub>3</sub>)

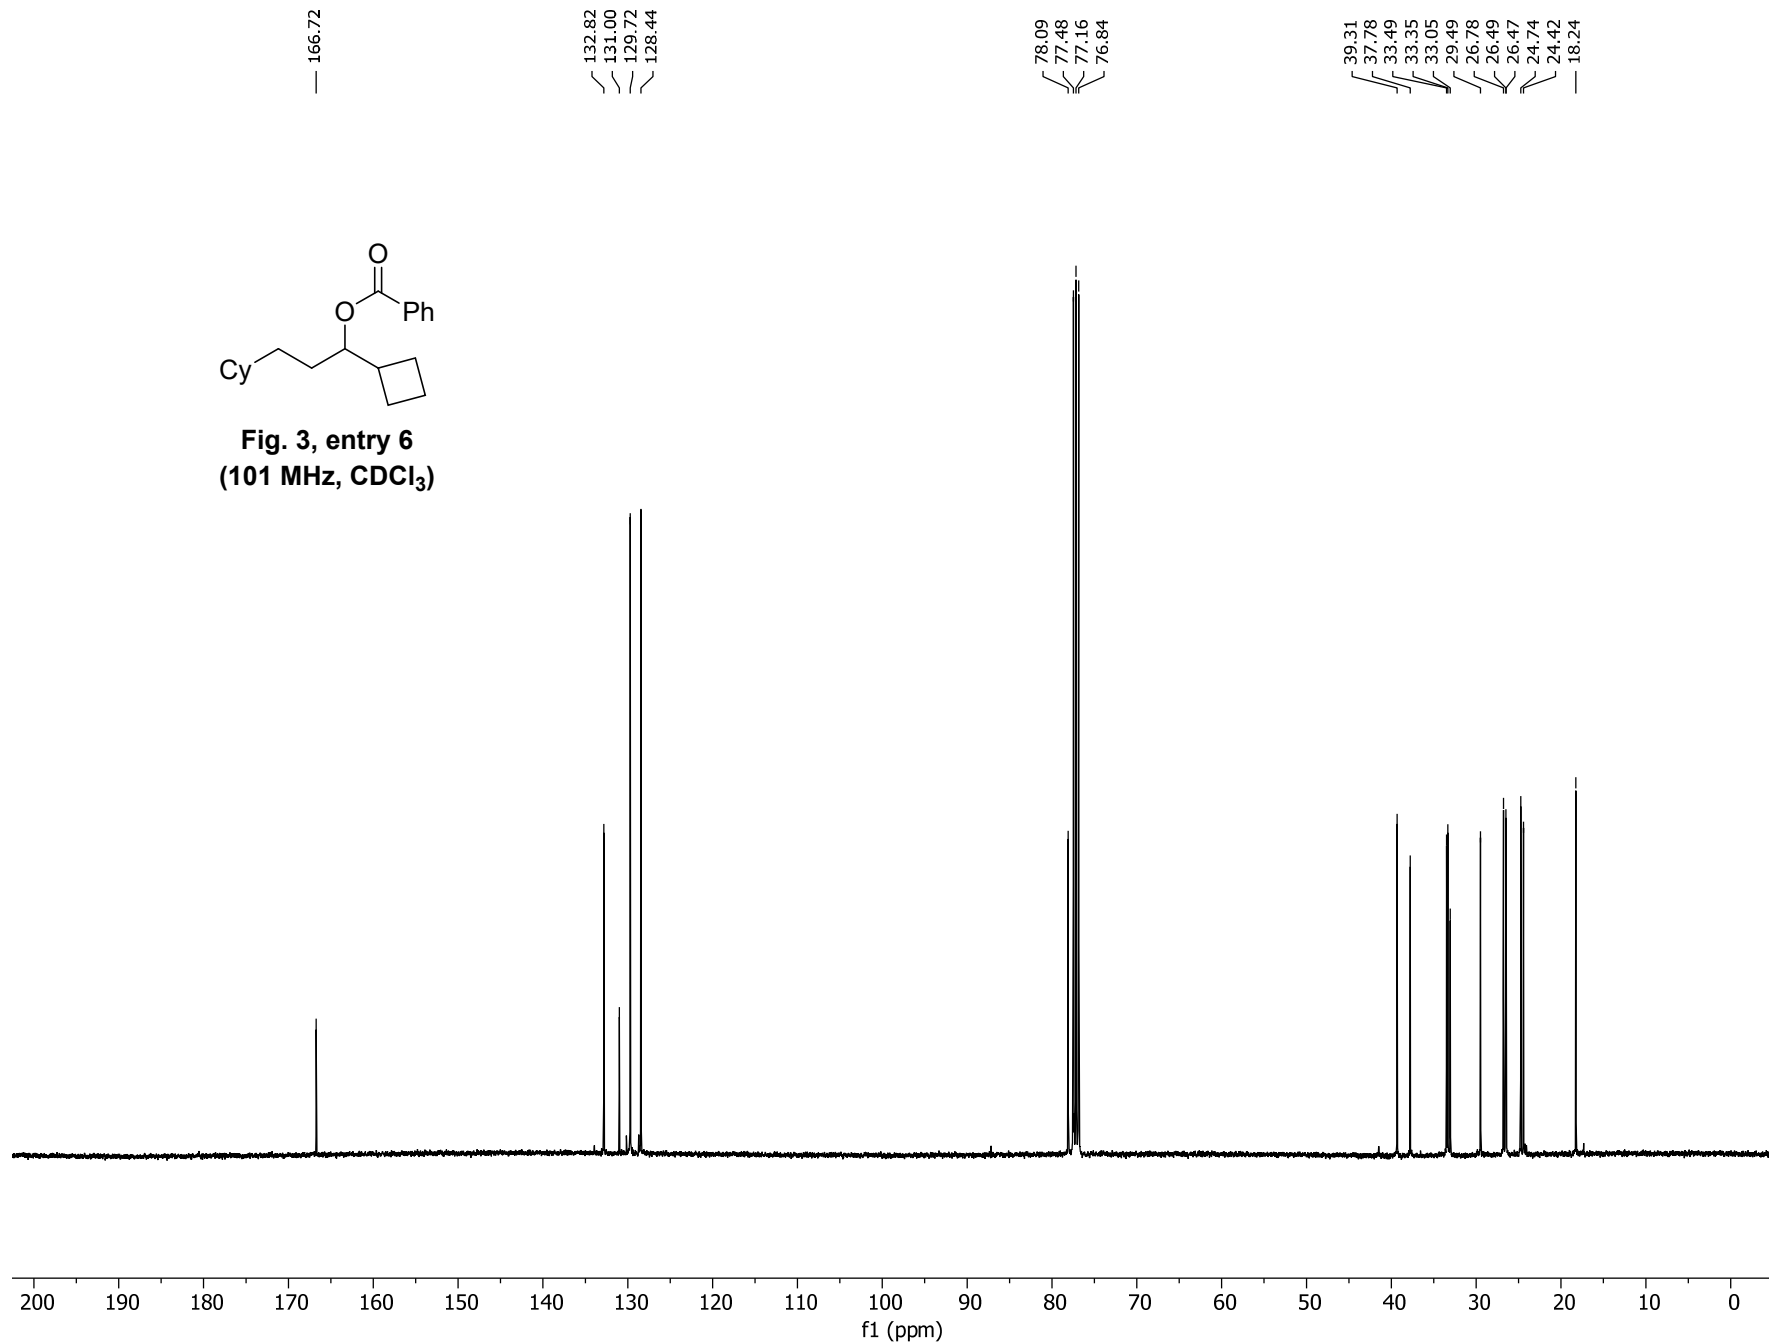

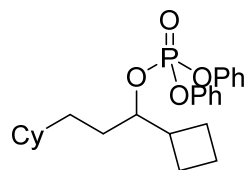

(400 MHz, CDCl<sub>3</sub>)

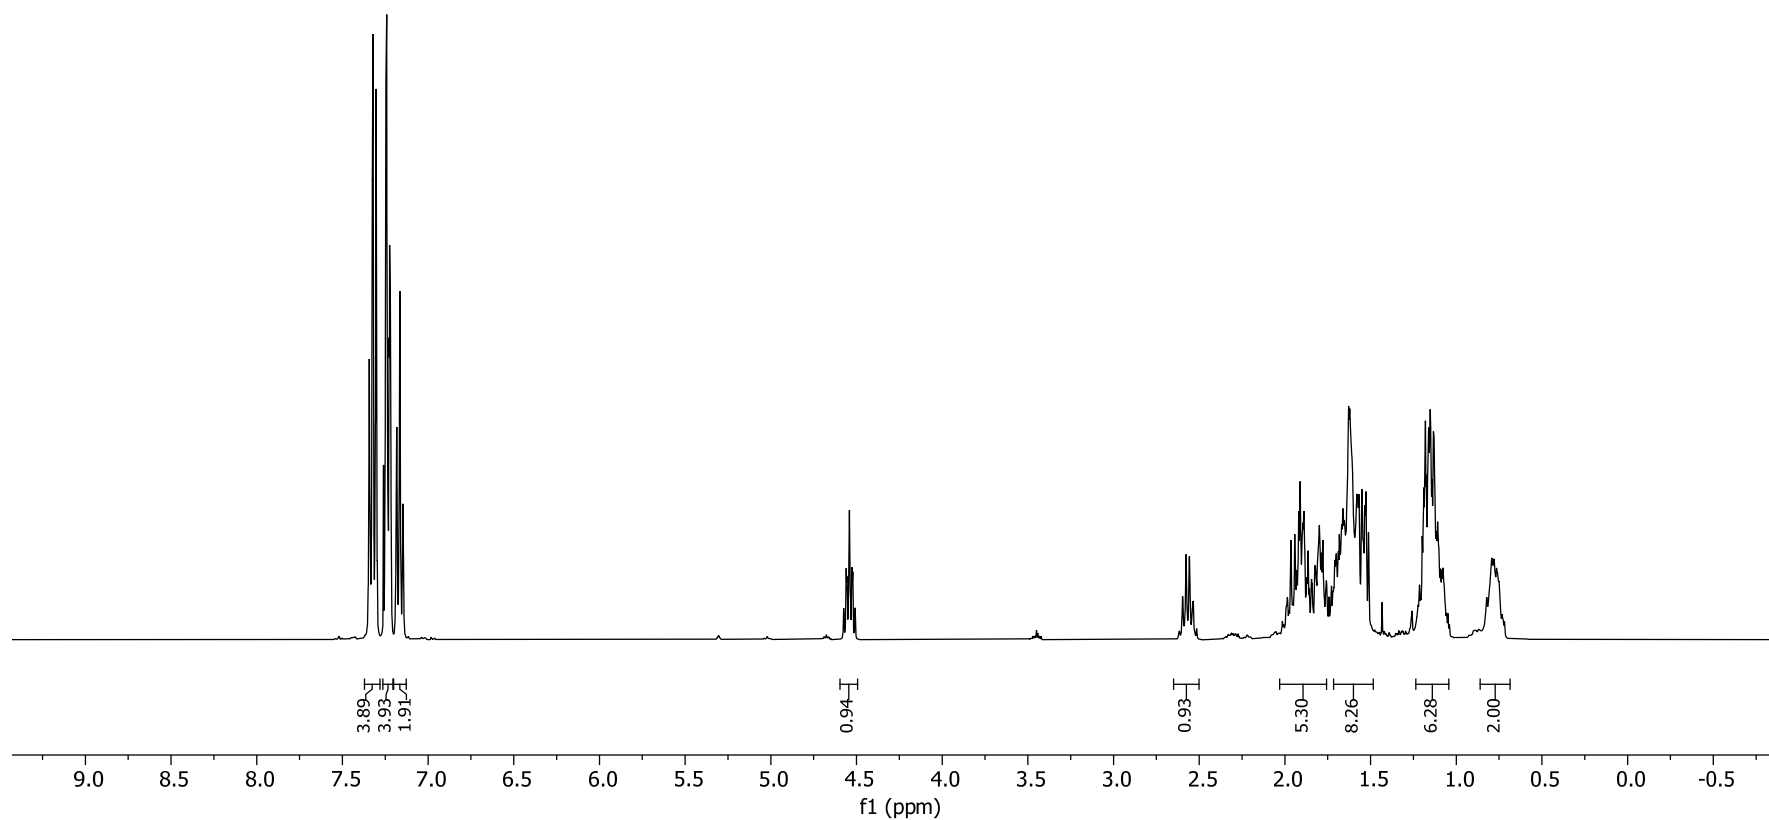

S-71

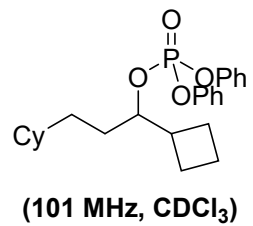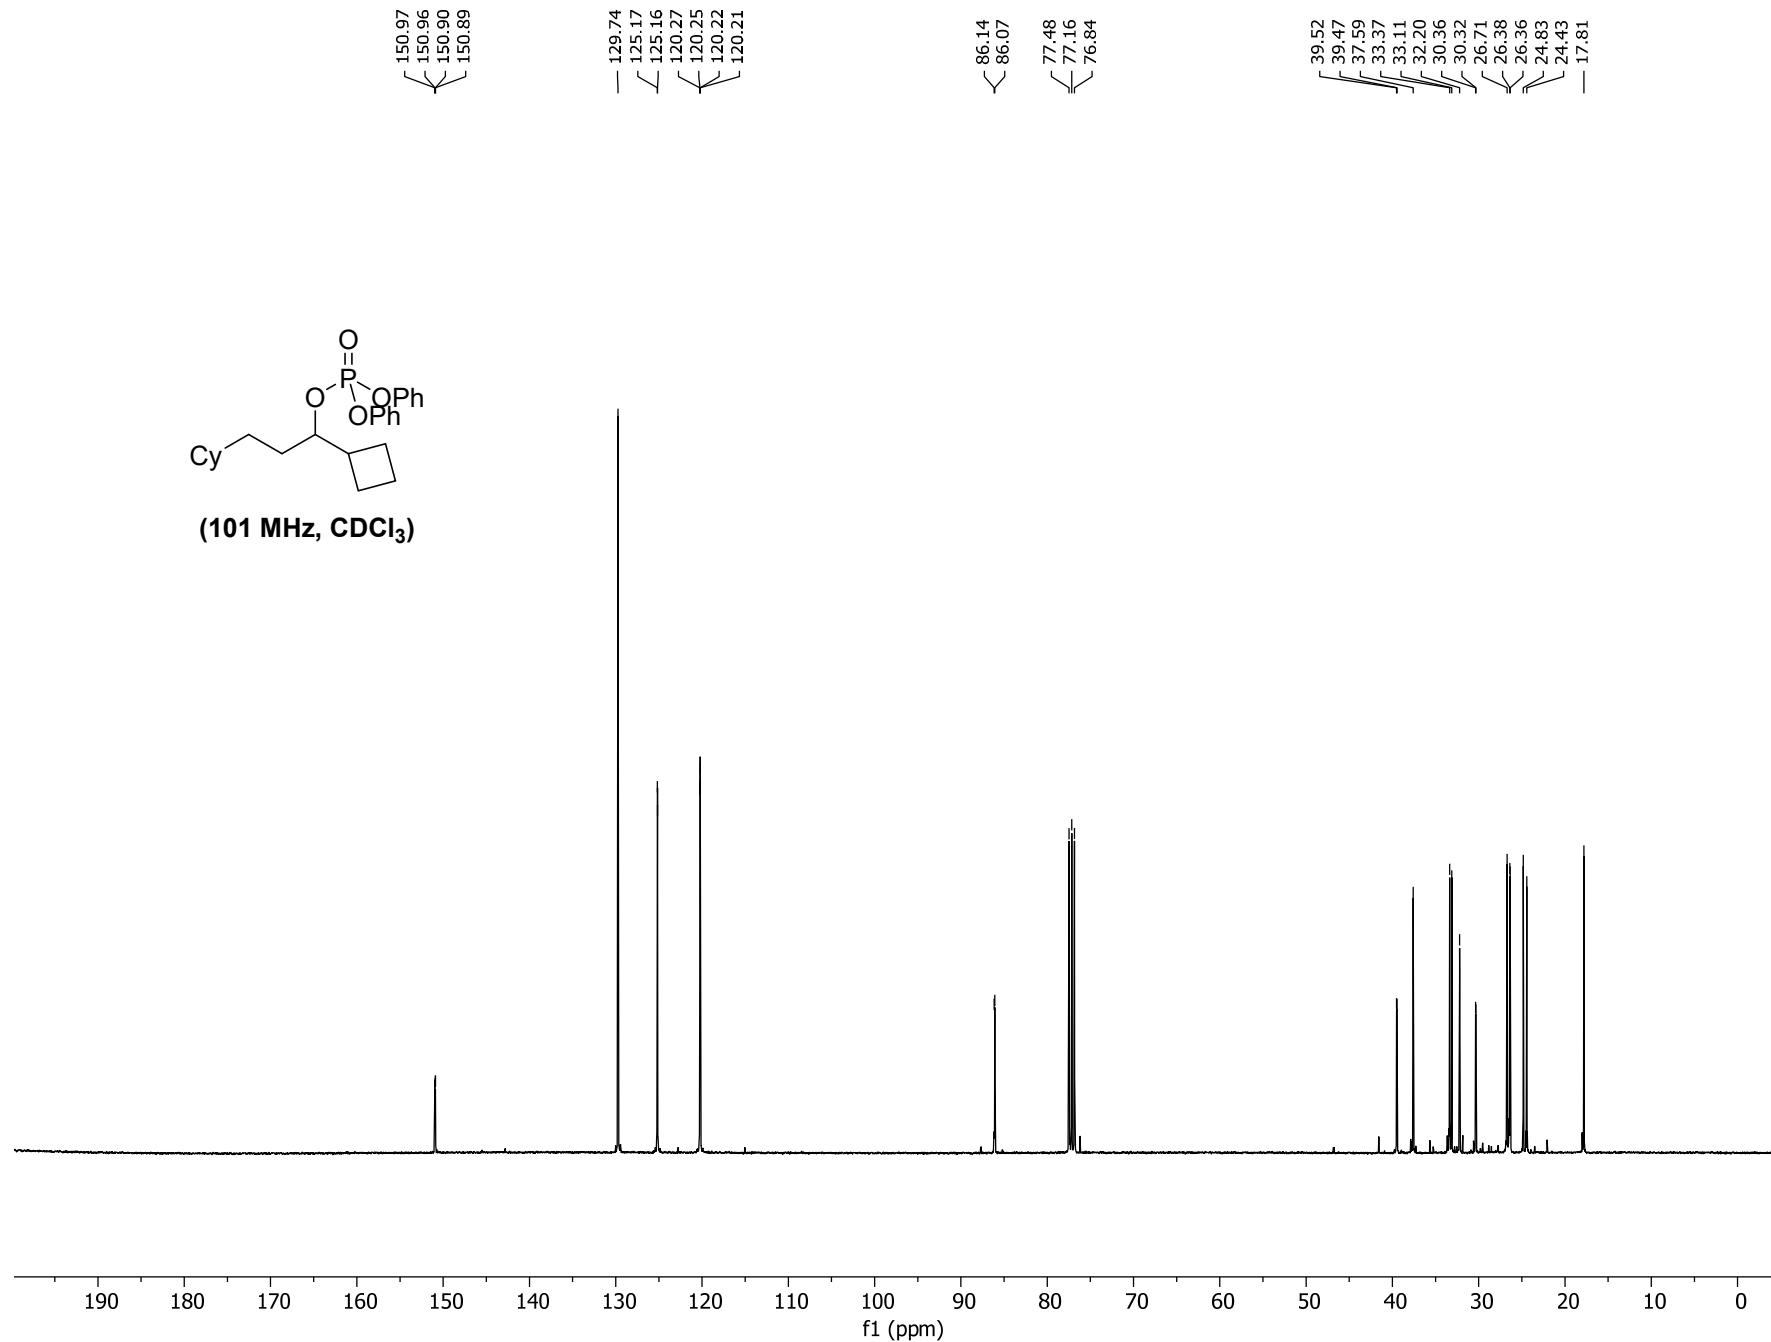



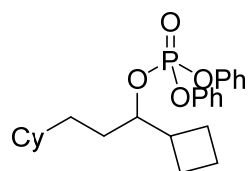

(162 MHz, CDCl<sub>3</sub>)

-12.05

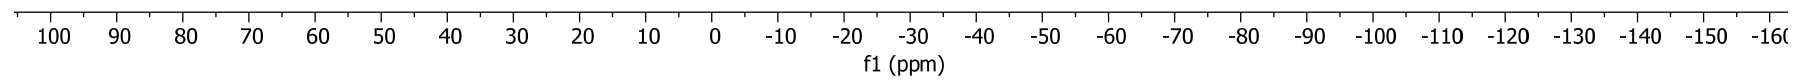

S-73

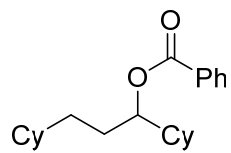

**Fig. 3, entry 7**  
**(400 MHz, CDCl<sub>3</sub>)**

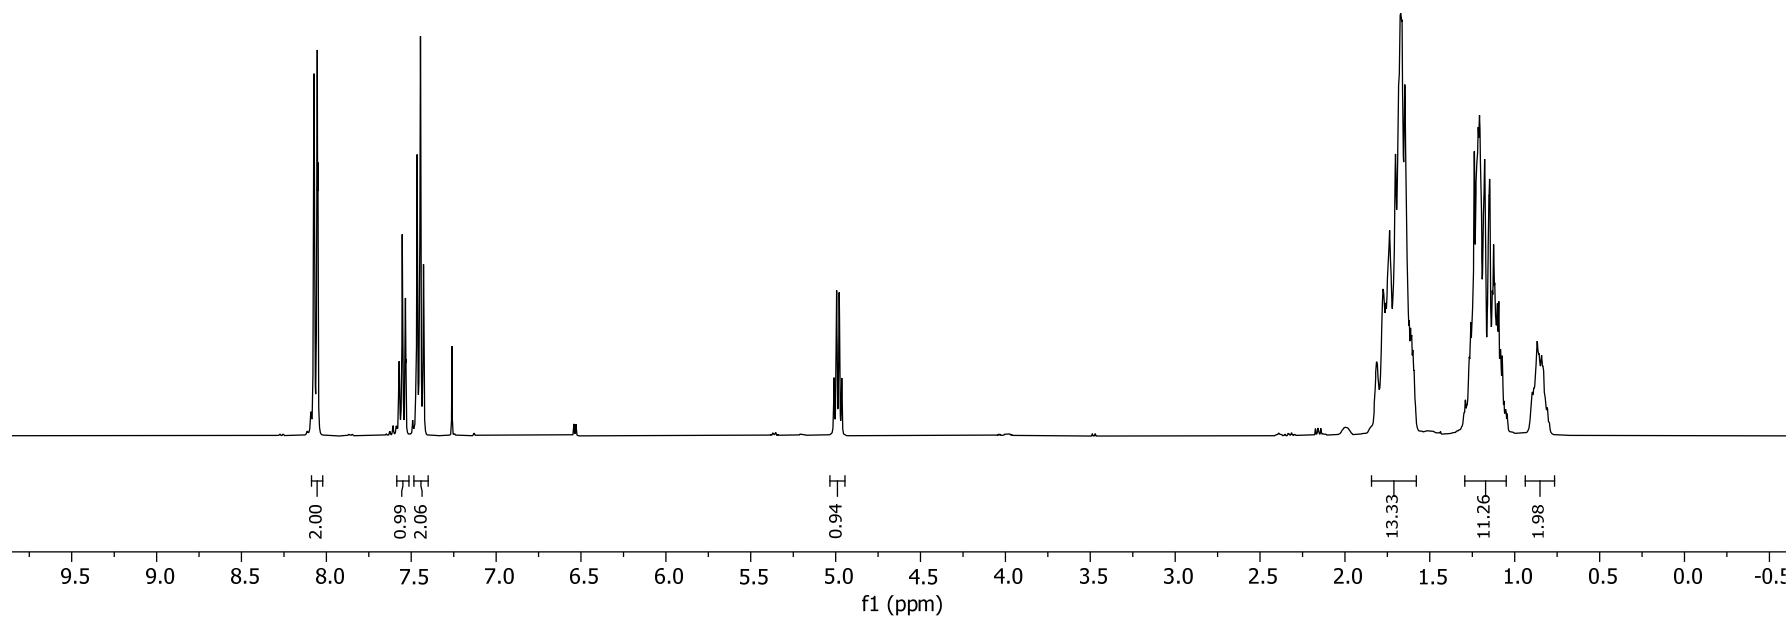

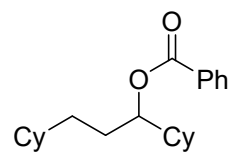

**Fig. 3, entry 7**  
**(101 MHz, CDCl<sub>3</sub>)**

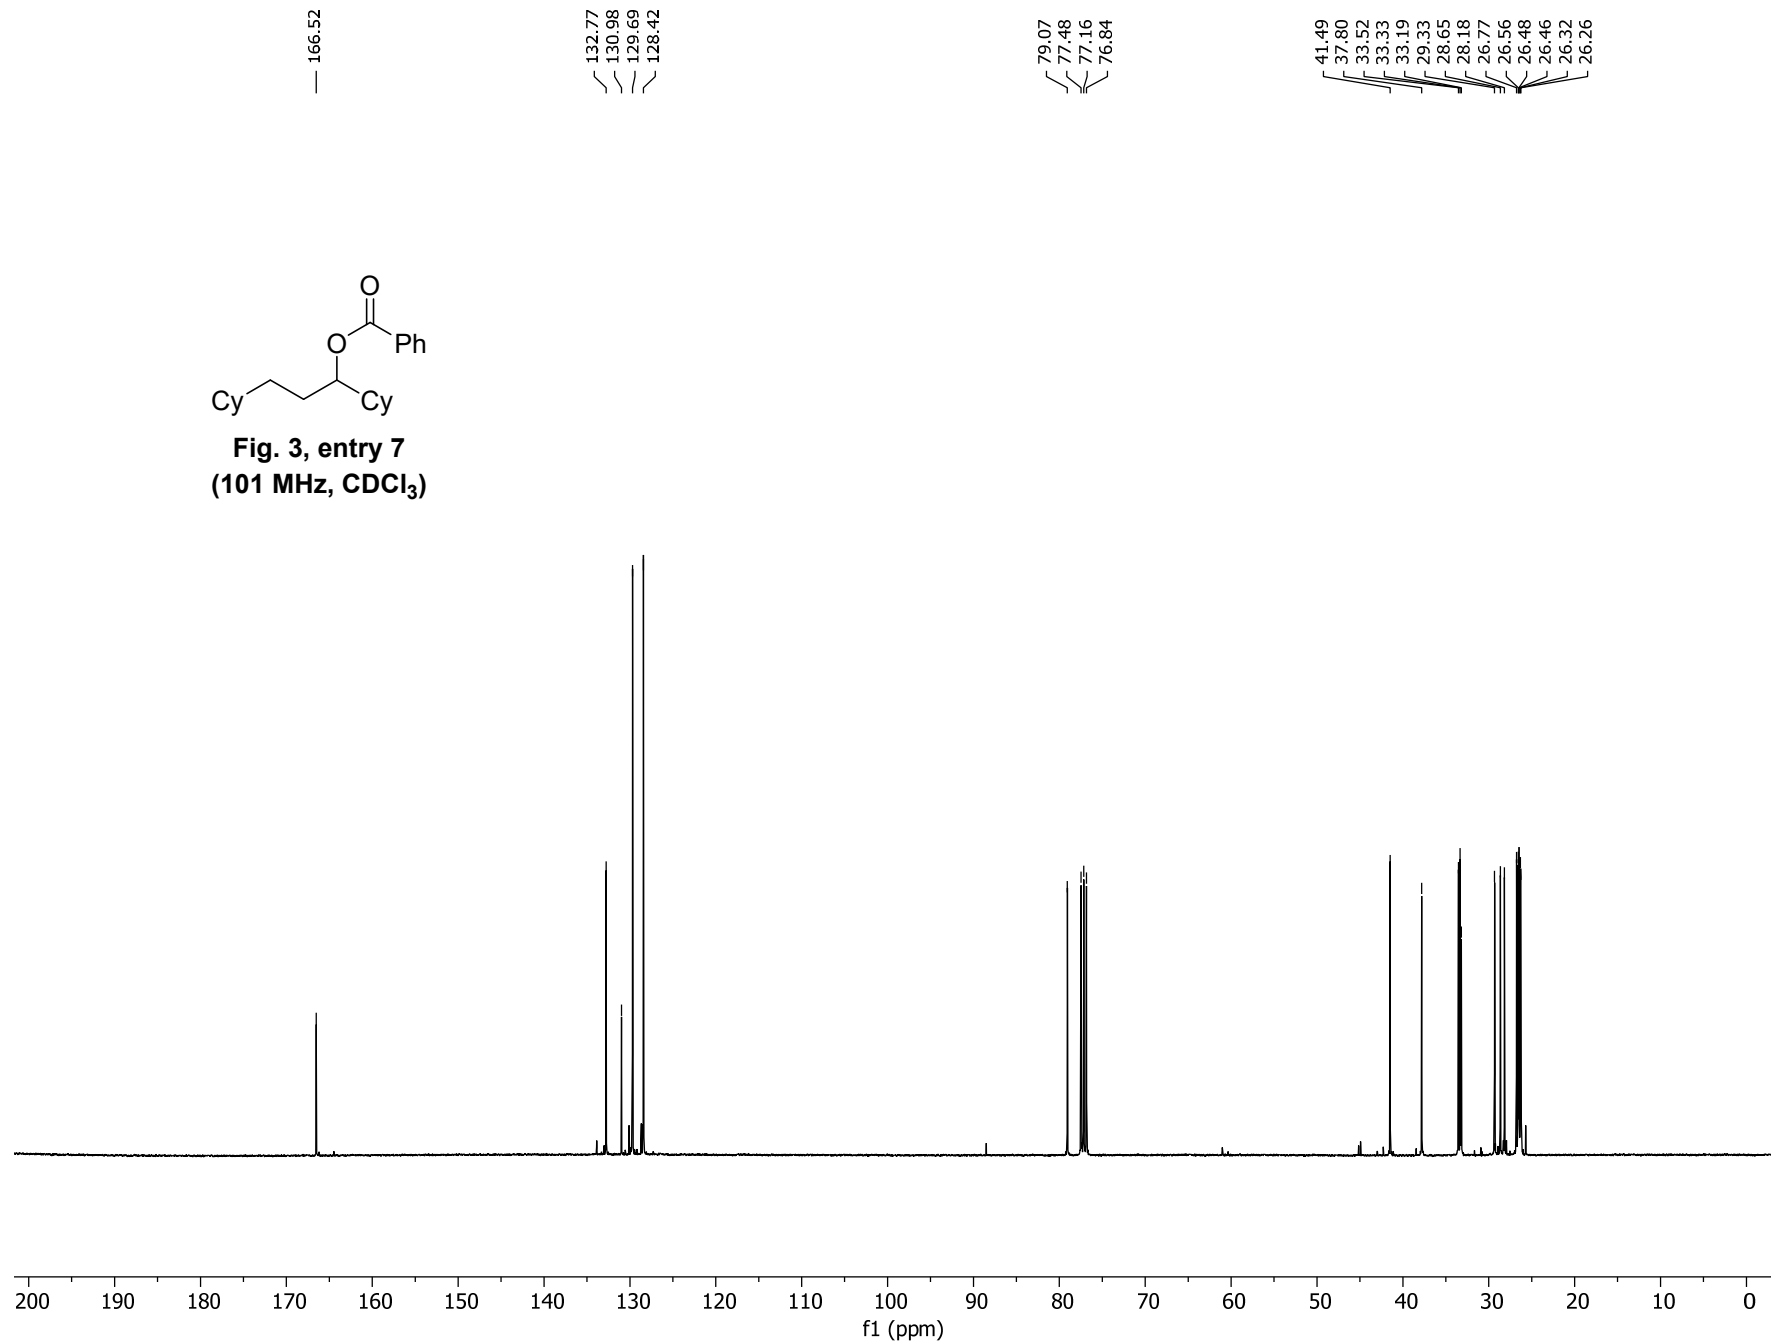

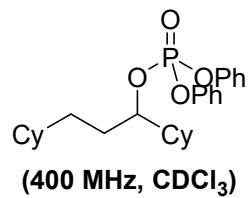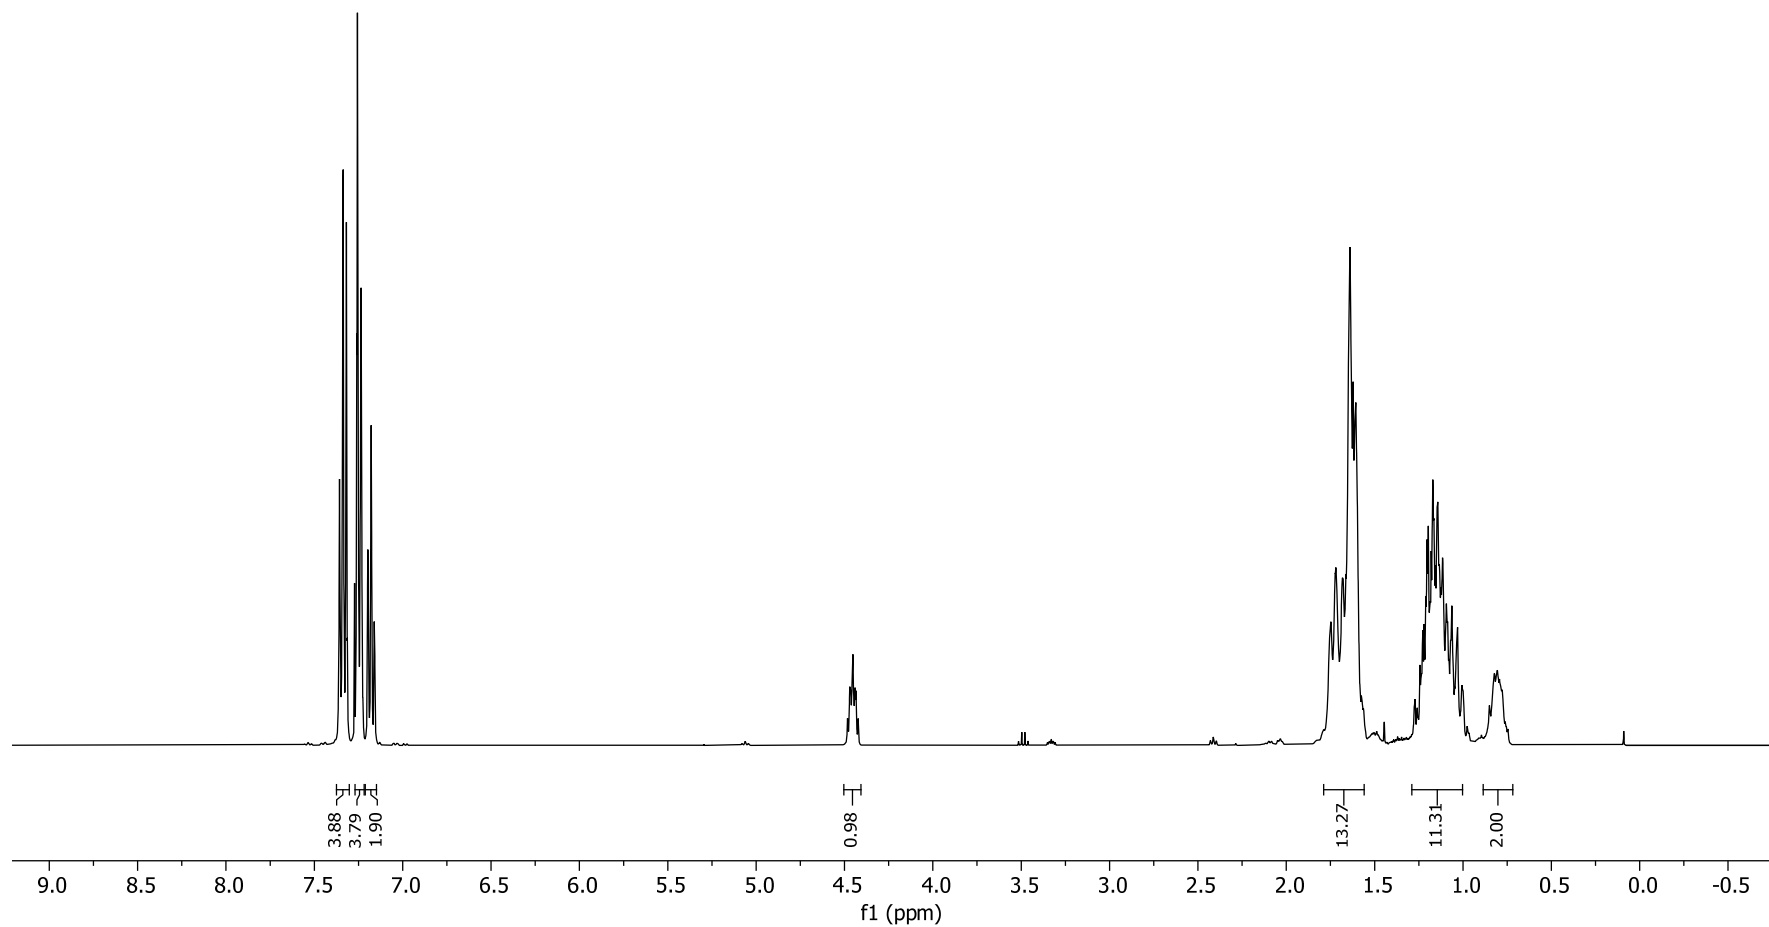

S-76

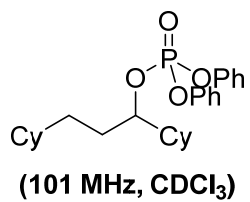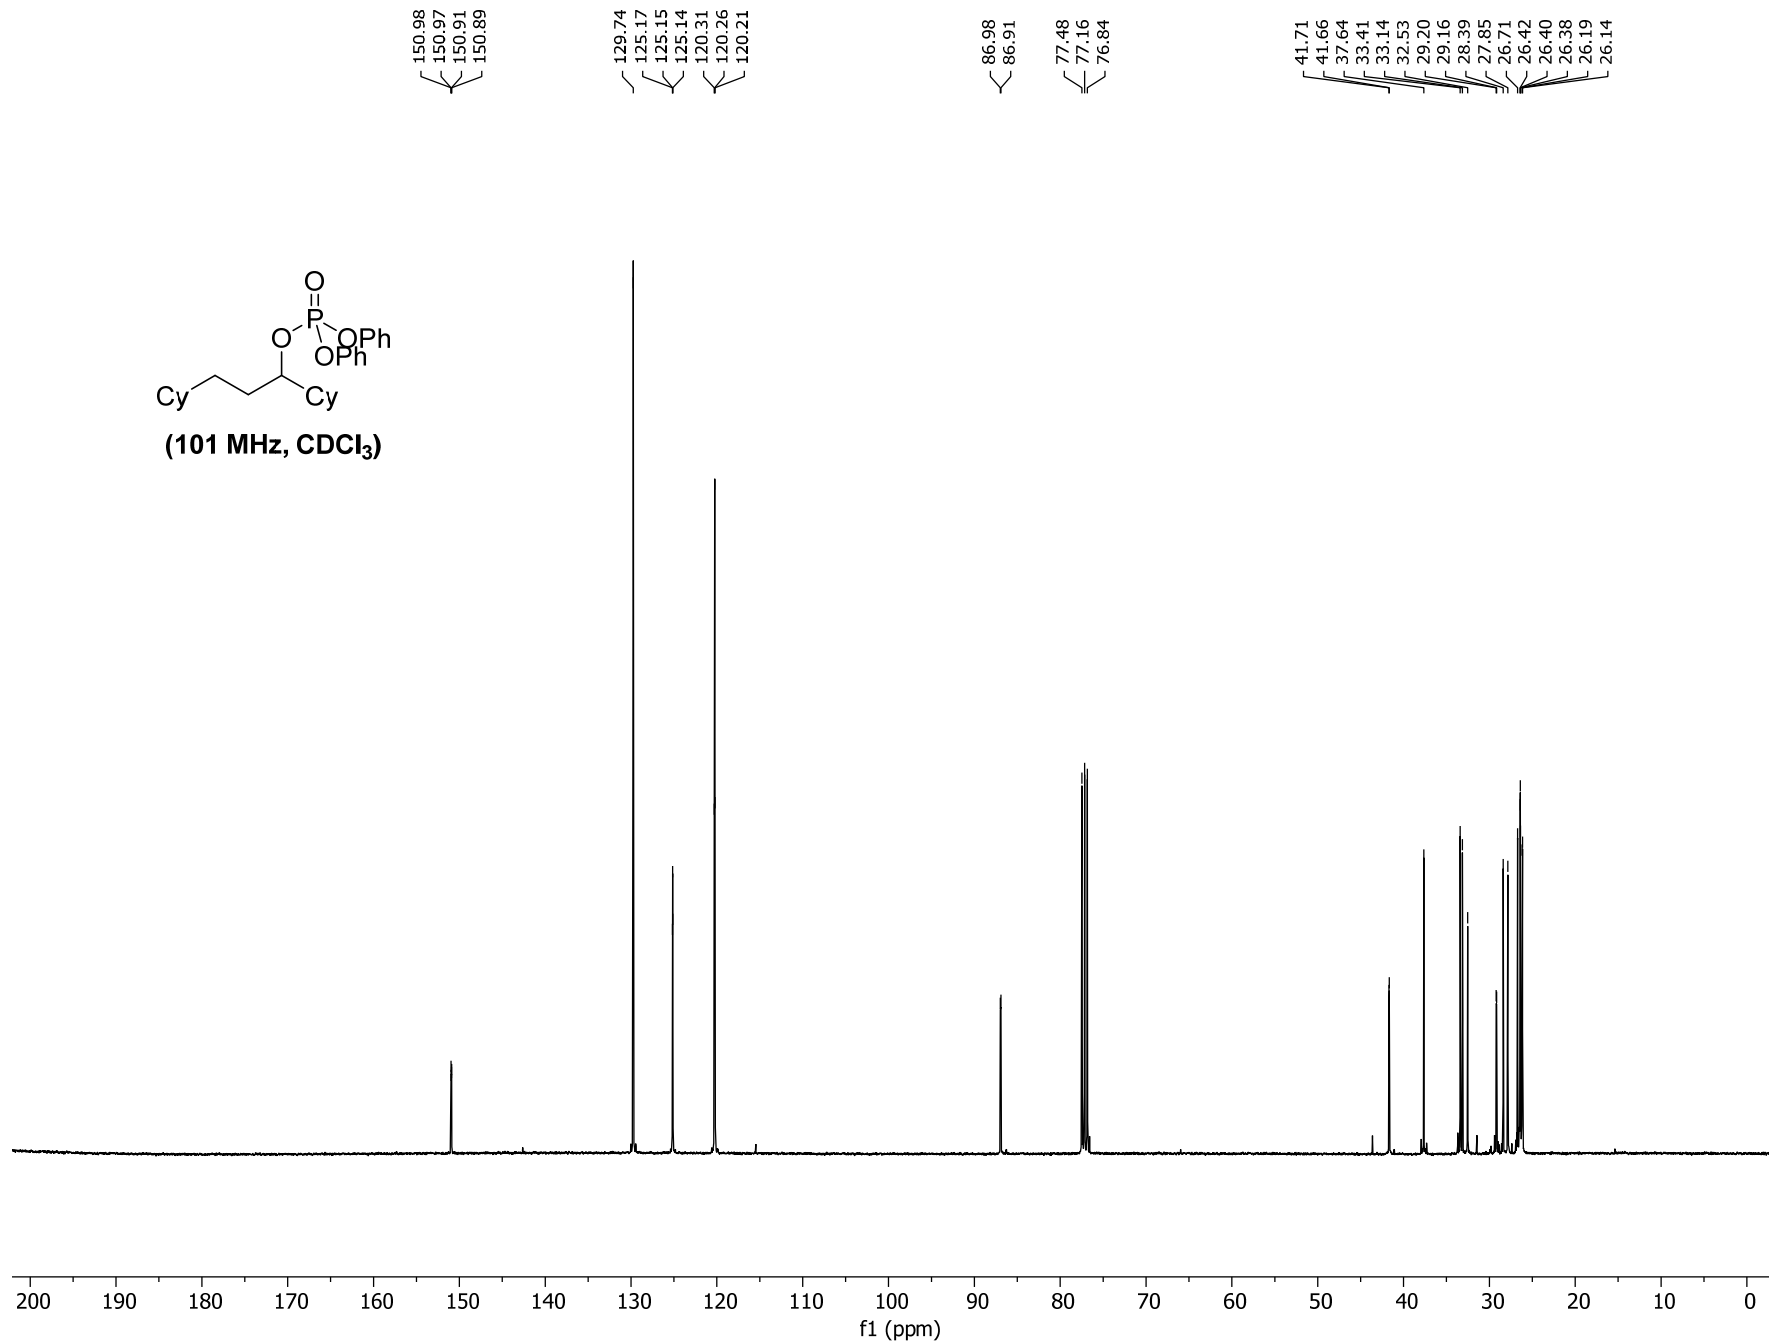

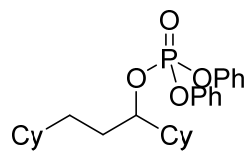

(162 MHz, CDCl<sub>3</sub>)

— -12.18

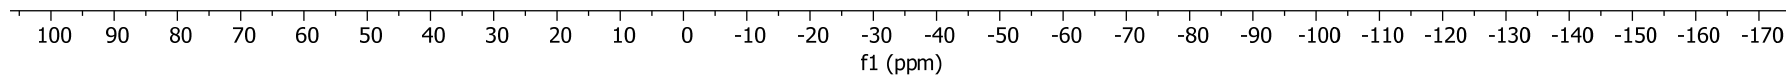

S-78

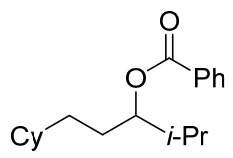

**Fig. 3, entry 8**  
**(400 MHz, CDCl<sub>3</sub>)**

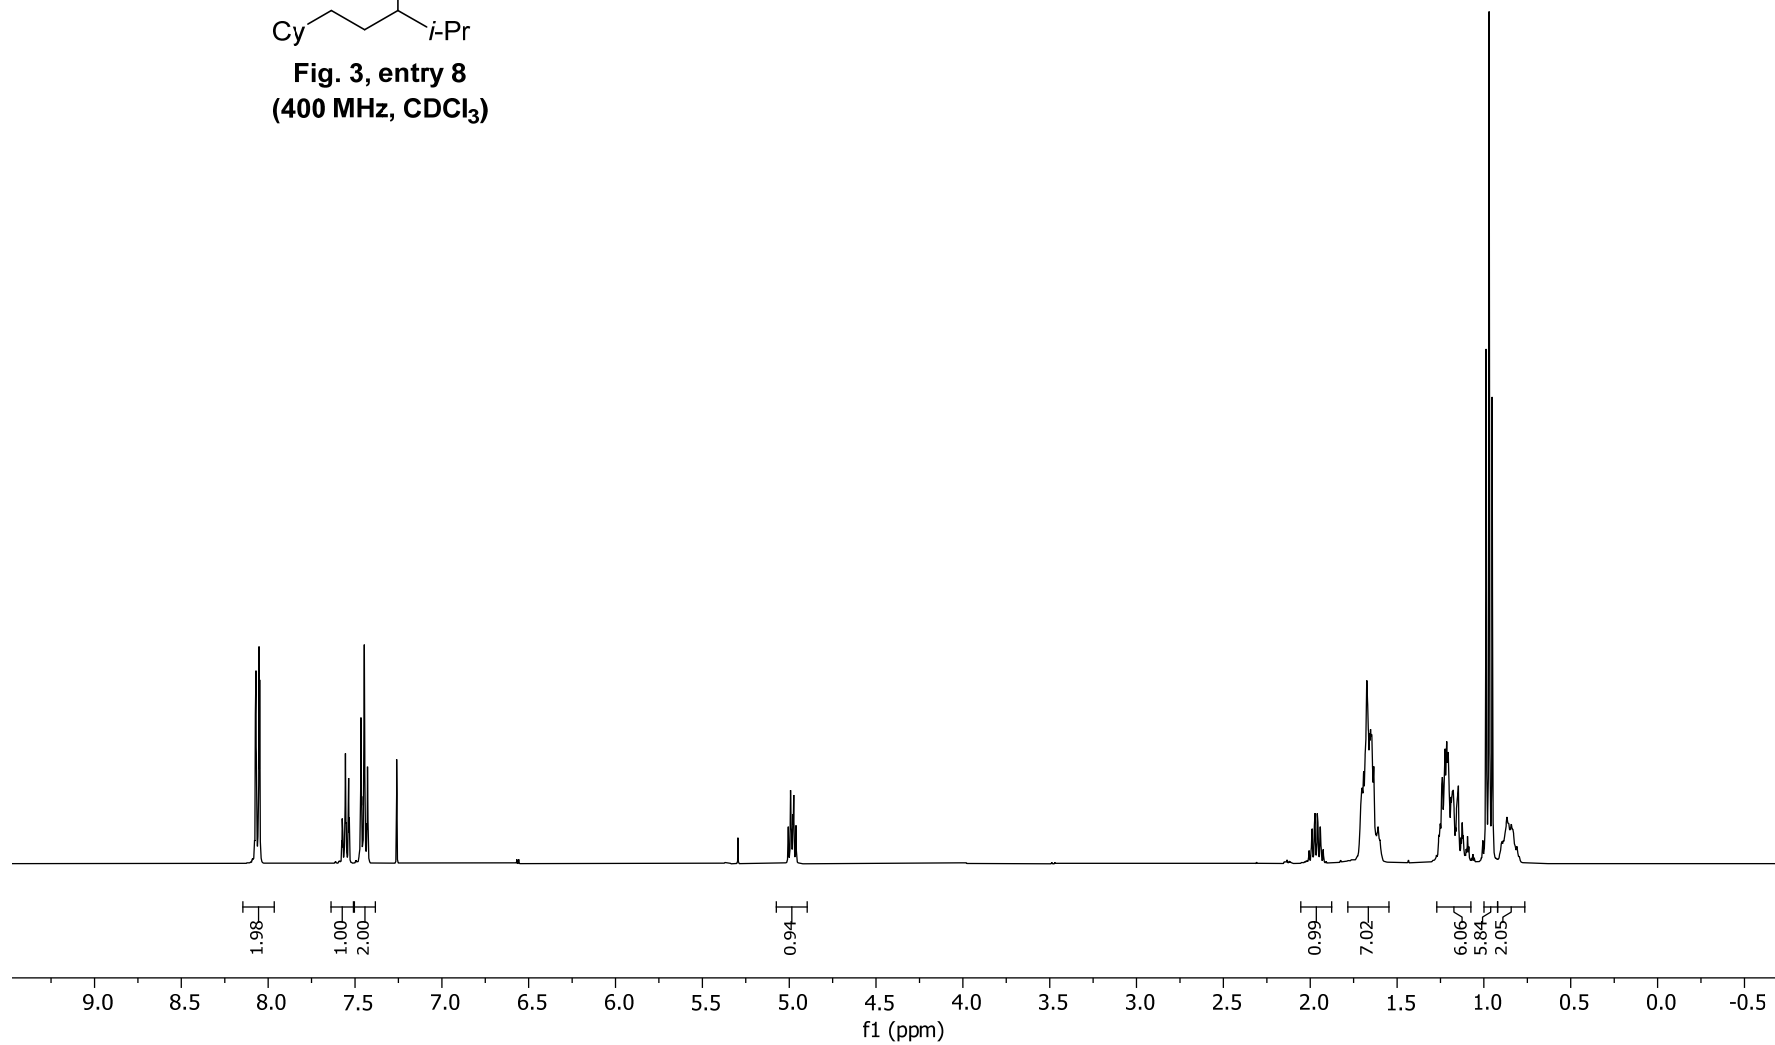

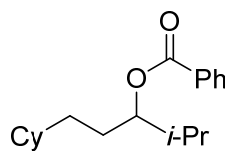

**Fig. 3, entry 8**  
**(101 MHz, CDCl<sub>3</sub>)**

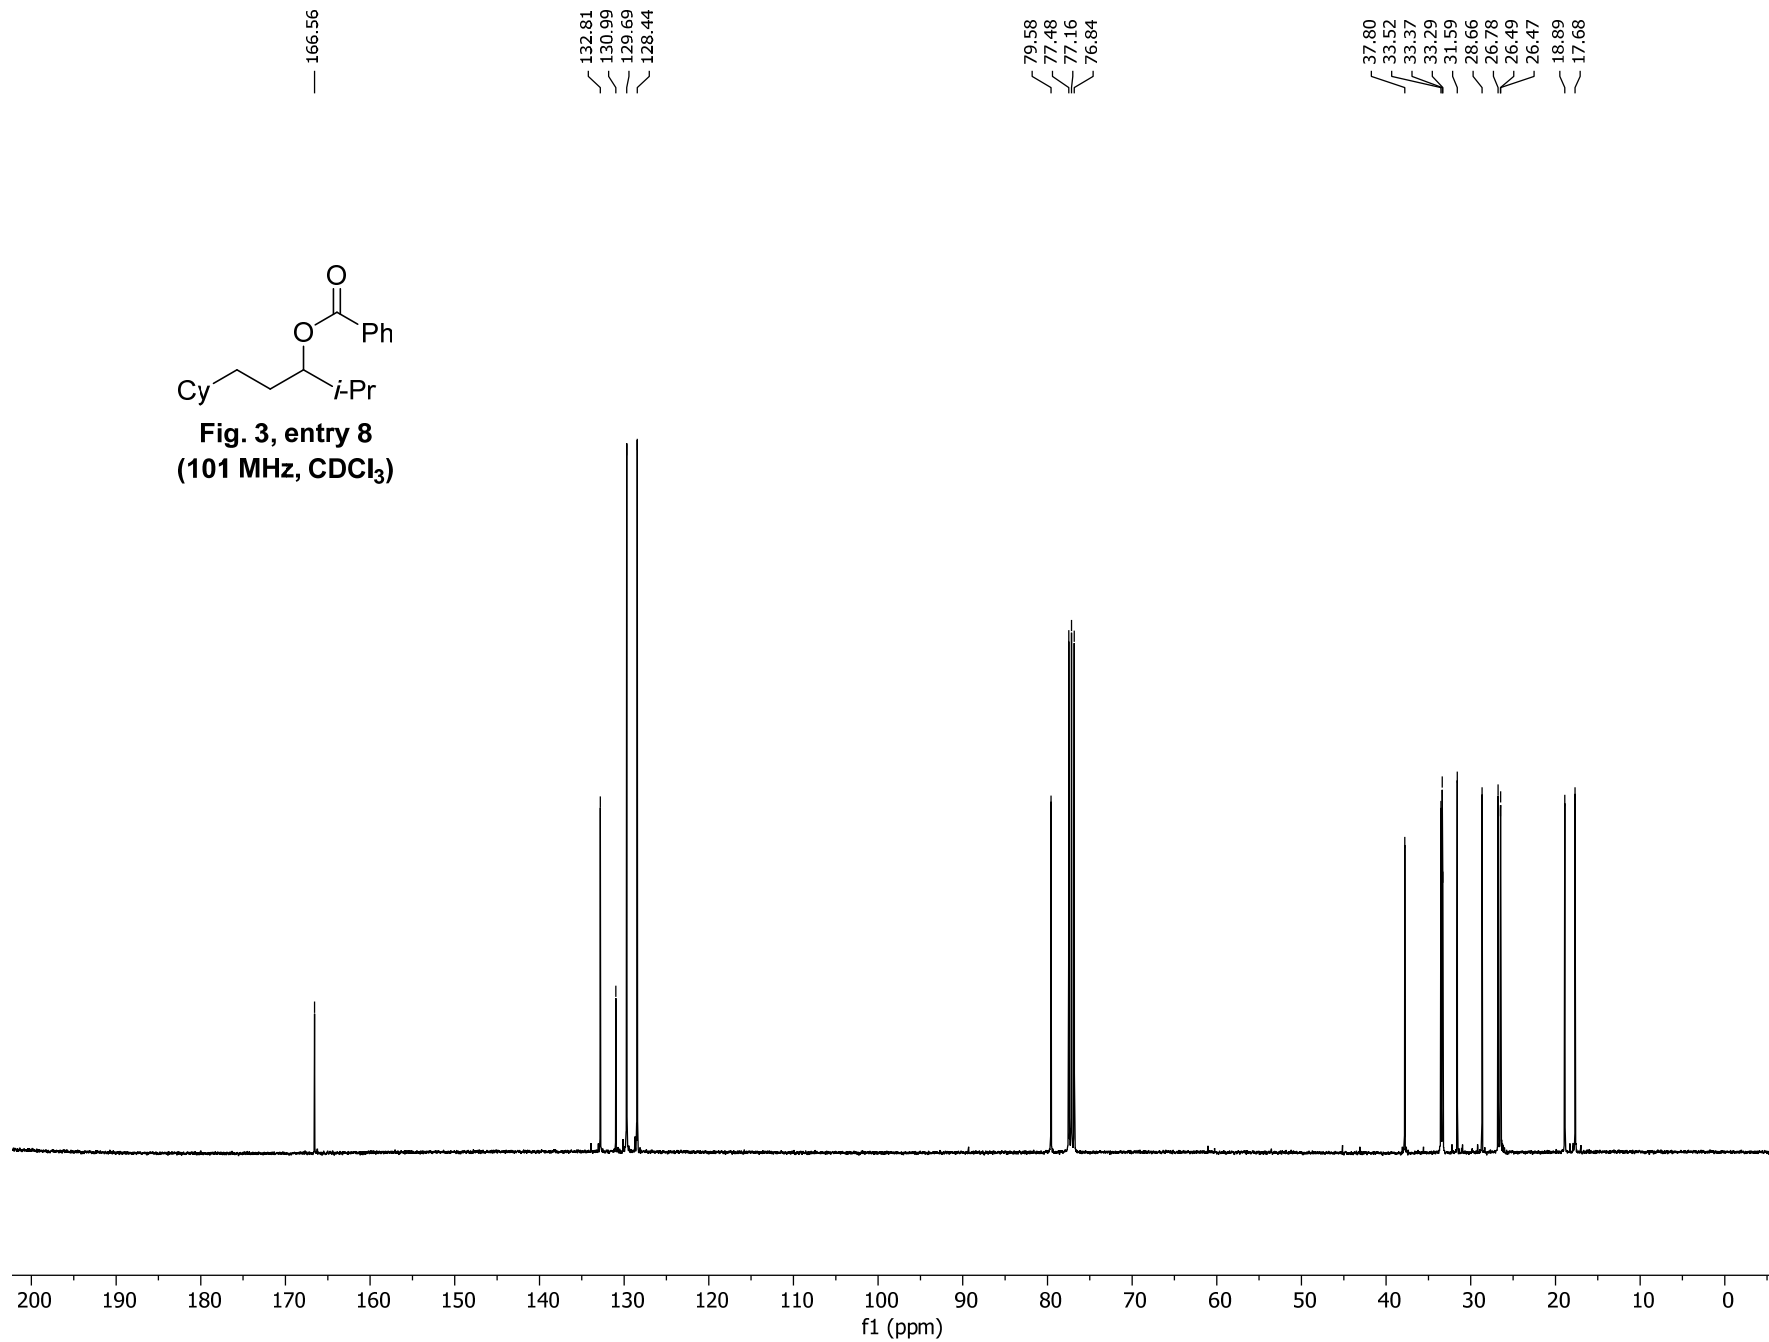



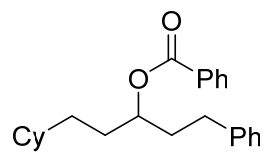

**Fig. 3, entry 9**  
**(400 MHz, CDCl<sub>3</sub>)**

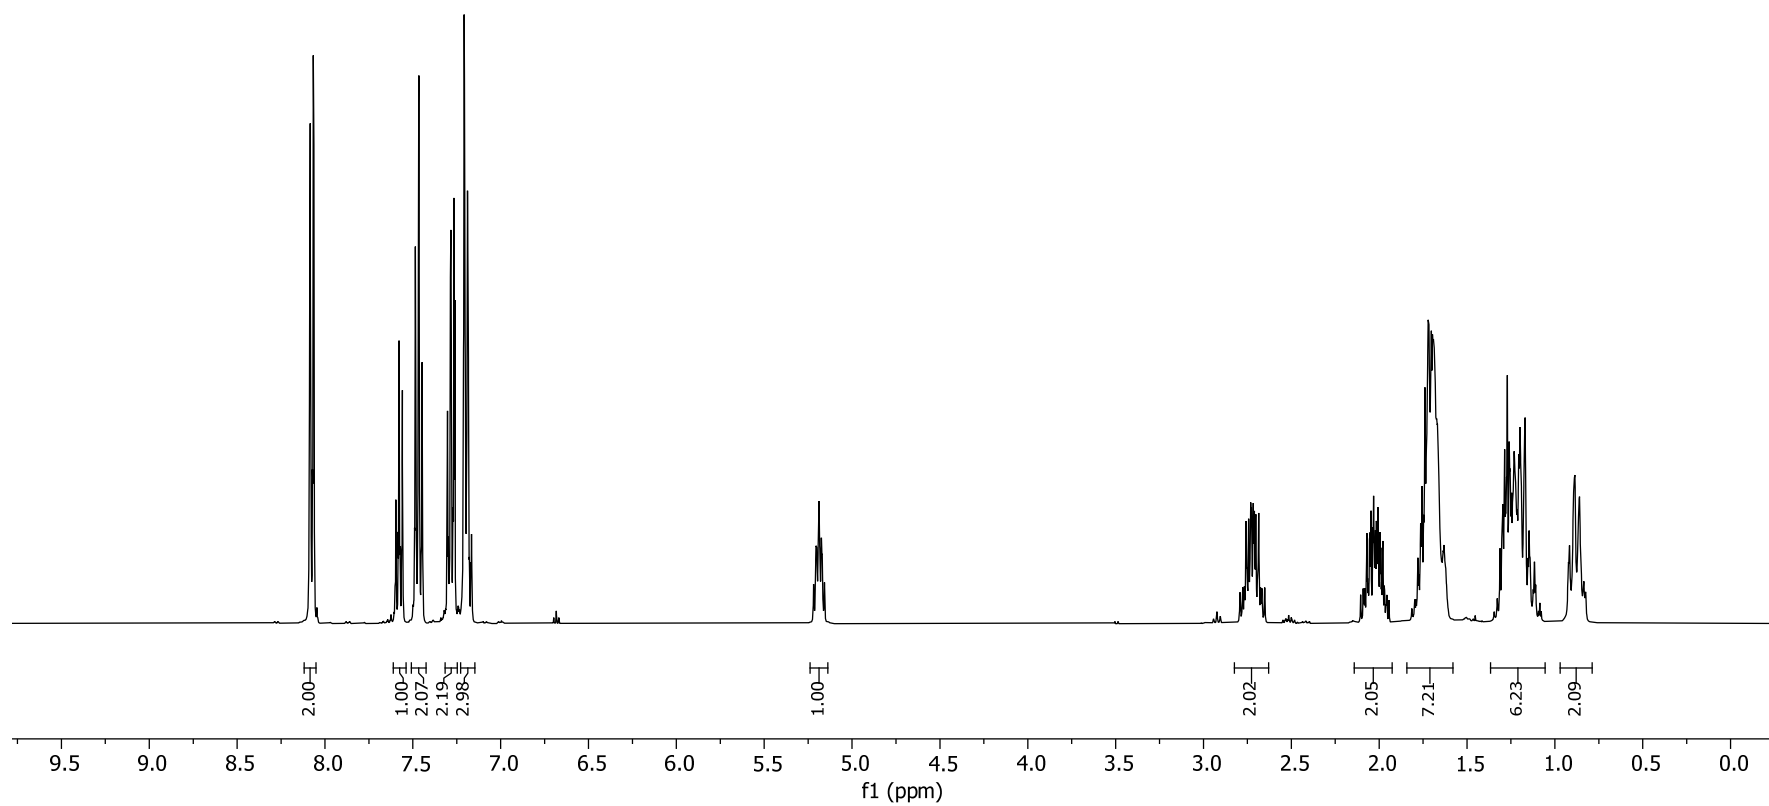

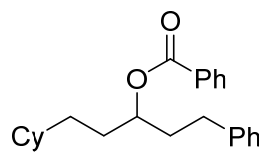

**Fig. 3, entry 9**  
(101 MHz, CDCl<sub>3</sub>)

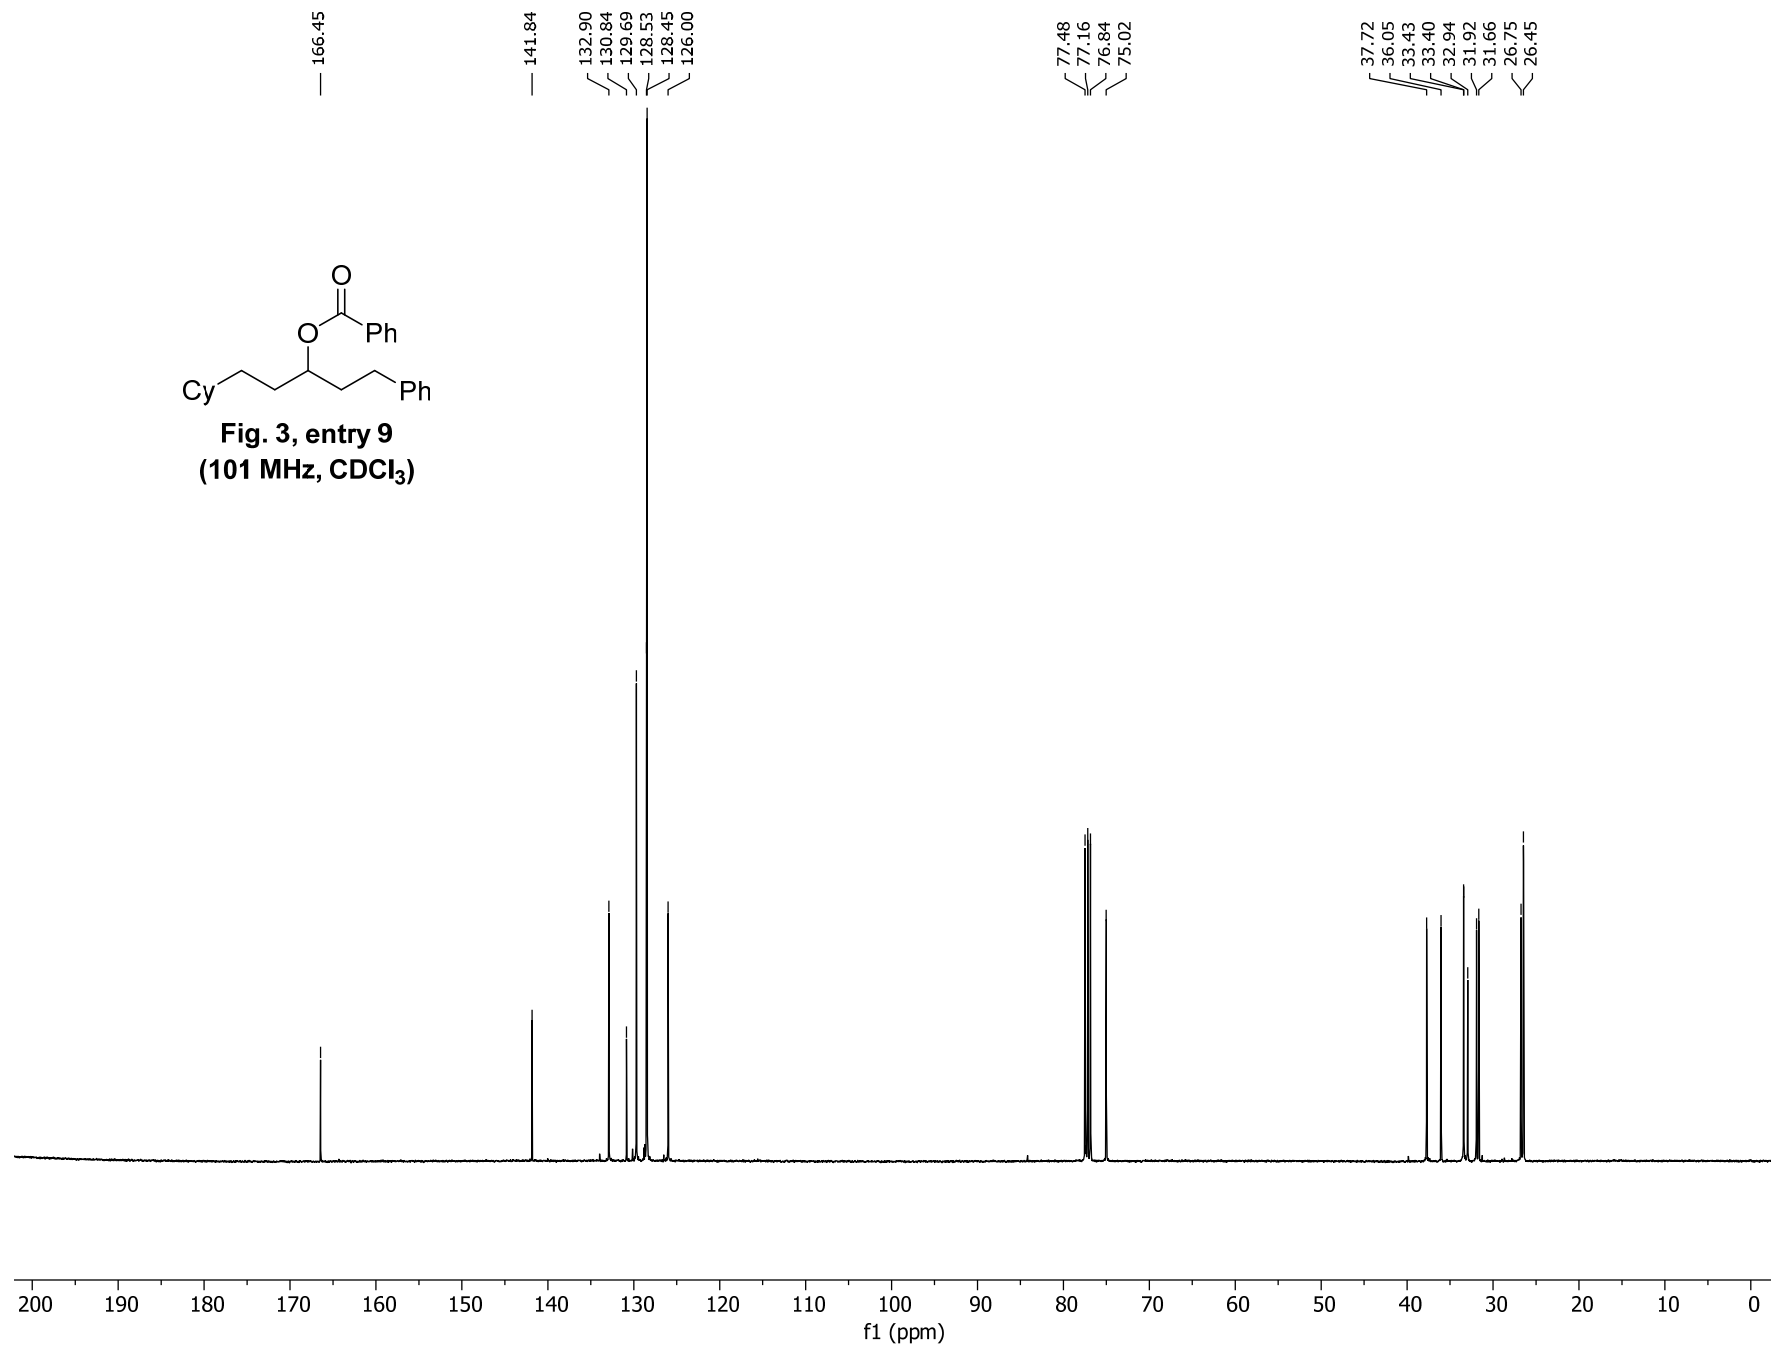

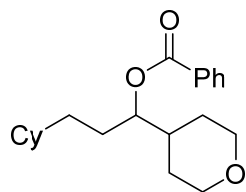

**Fig. 3, entry 10**  
**(400 MHz, CDCl<sub>3</sub>)**

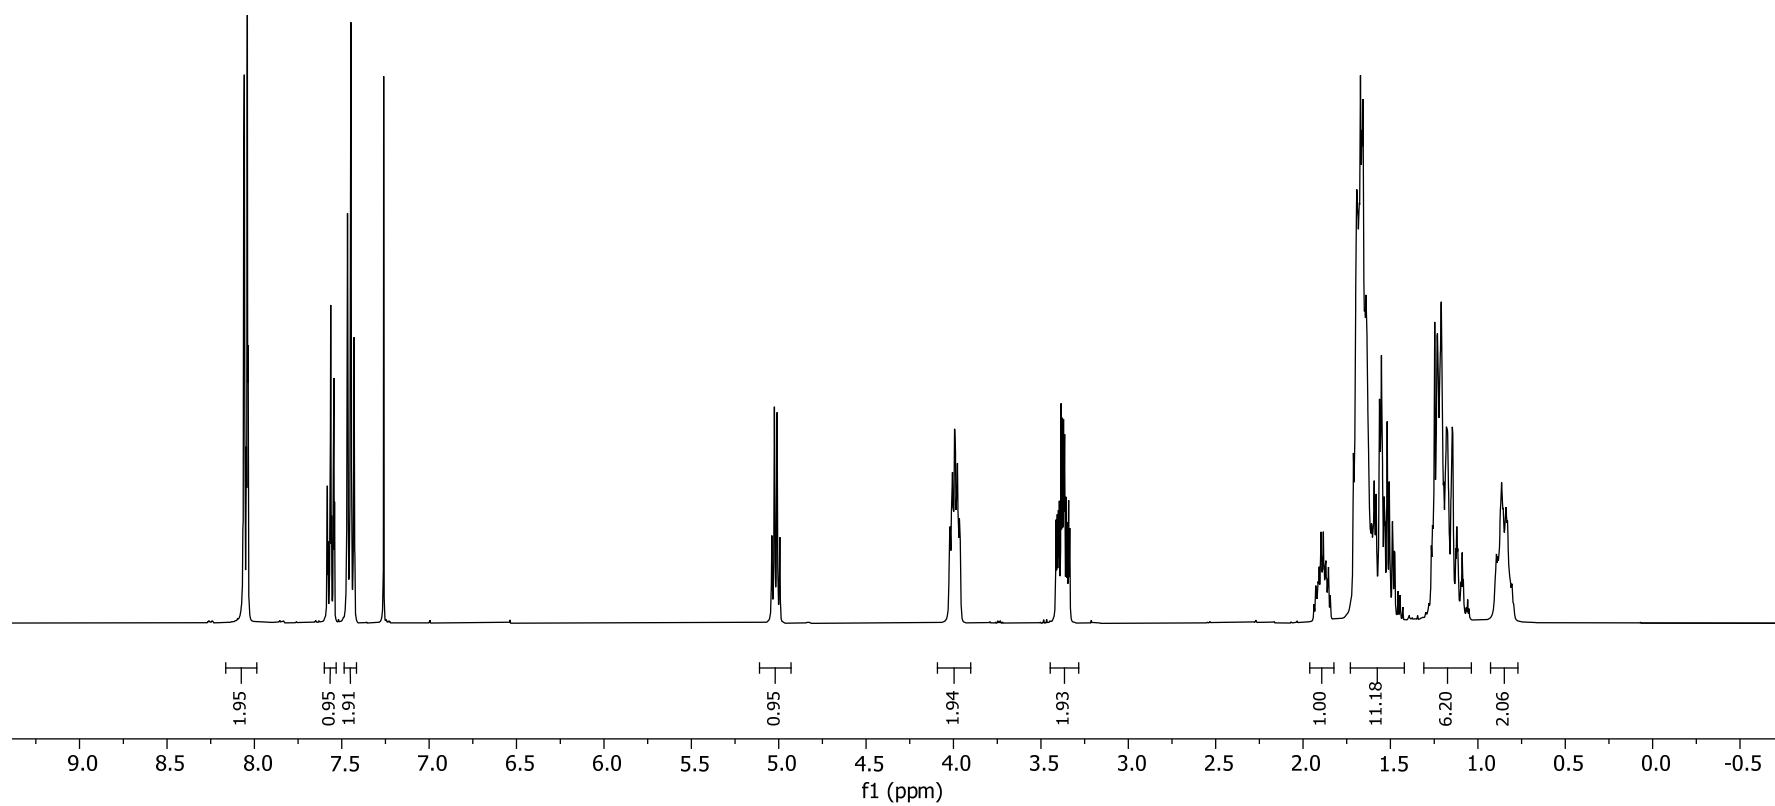

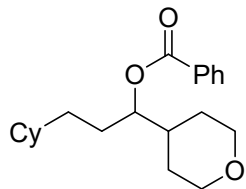

Fig. 3, entry 10  
(101 MHz, CDCl<sub>3</sub>)

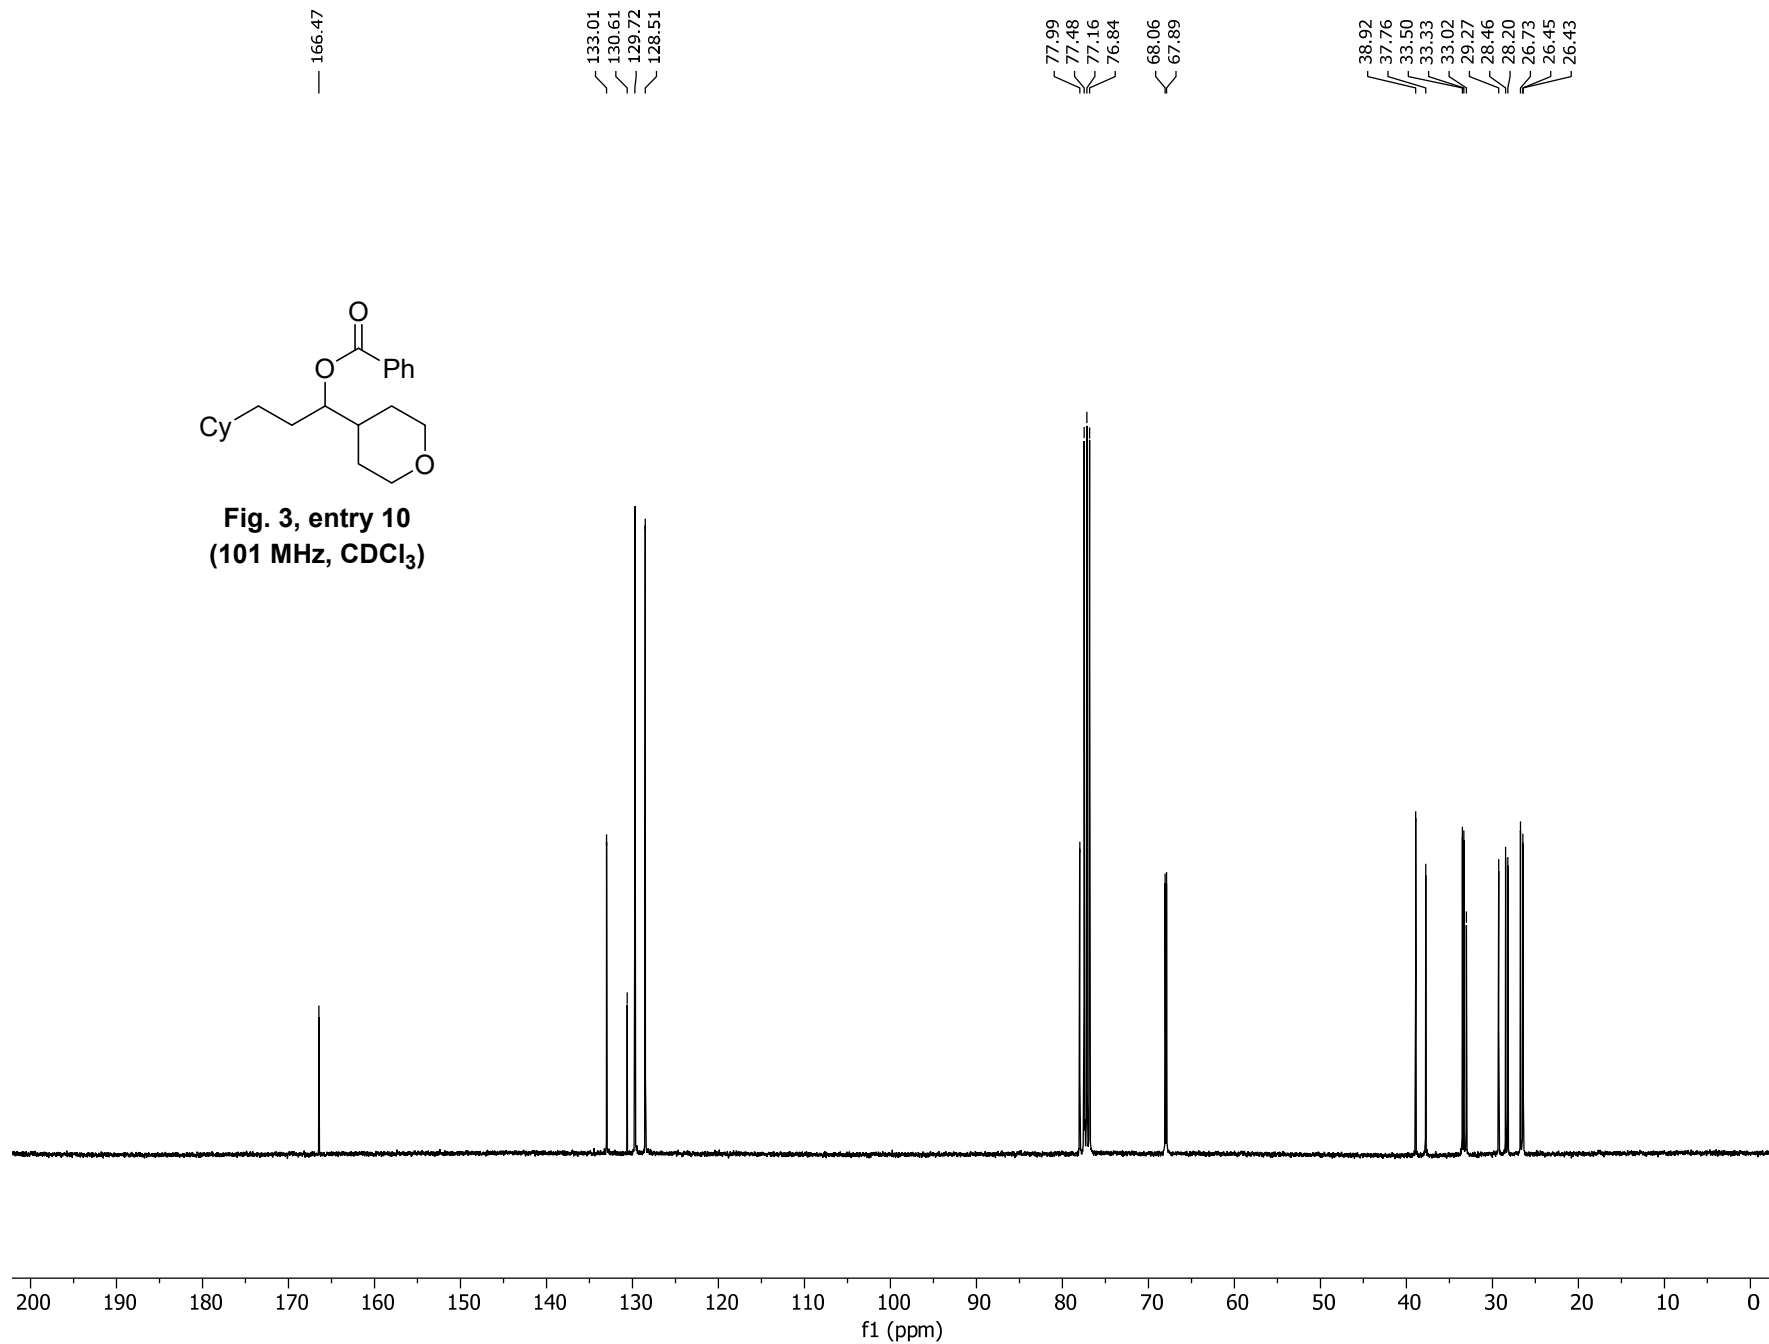

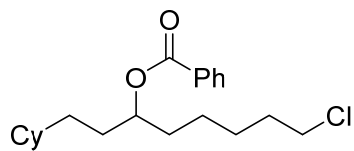

**Fig. 3, entry 11**  
**(400 MHz, CDCl<sub>3</sub>)**

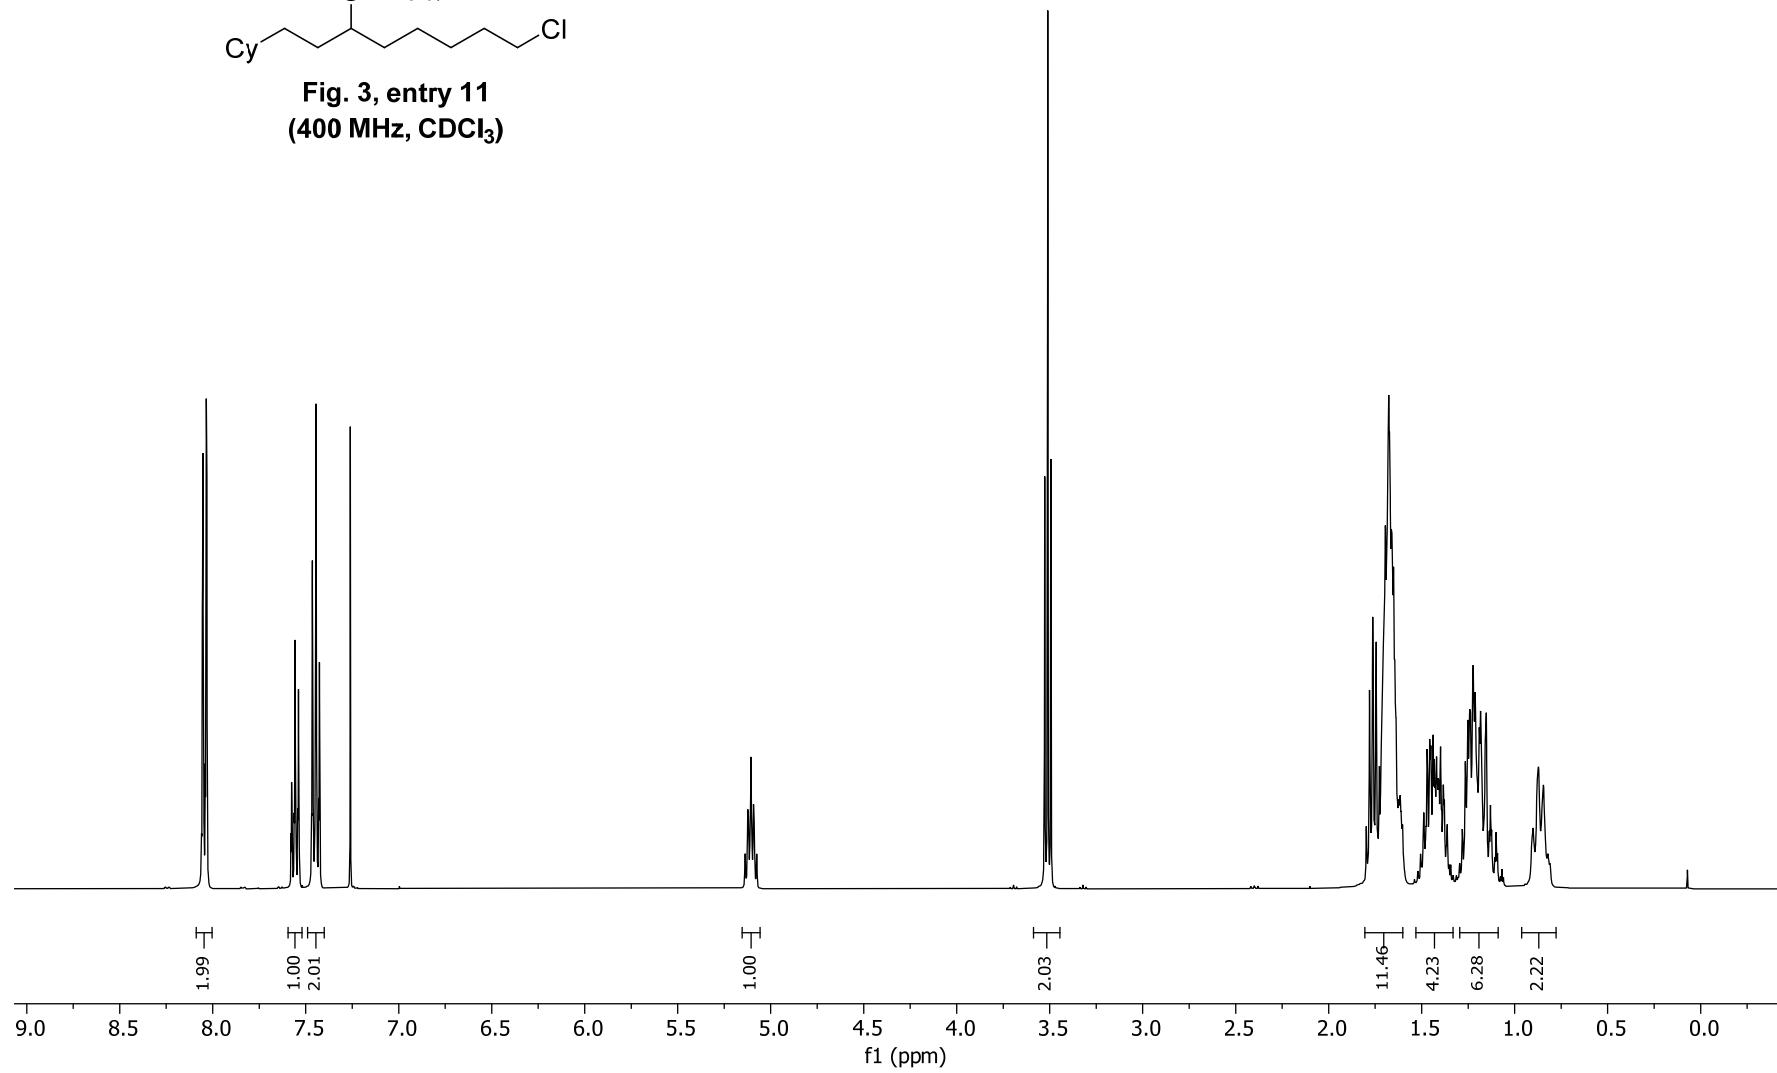

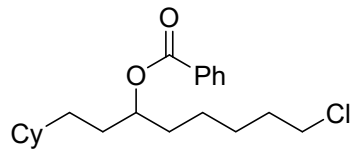

Fig. 3, entry 11  
(101 MHz, CDCl<sub>3</sub>)

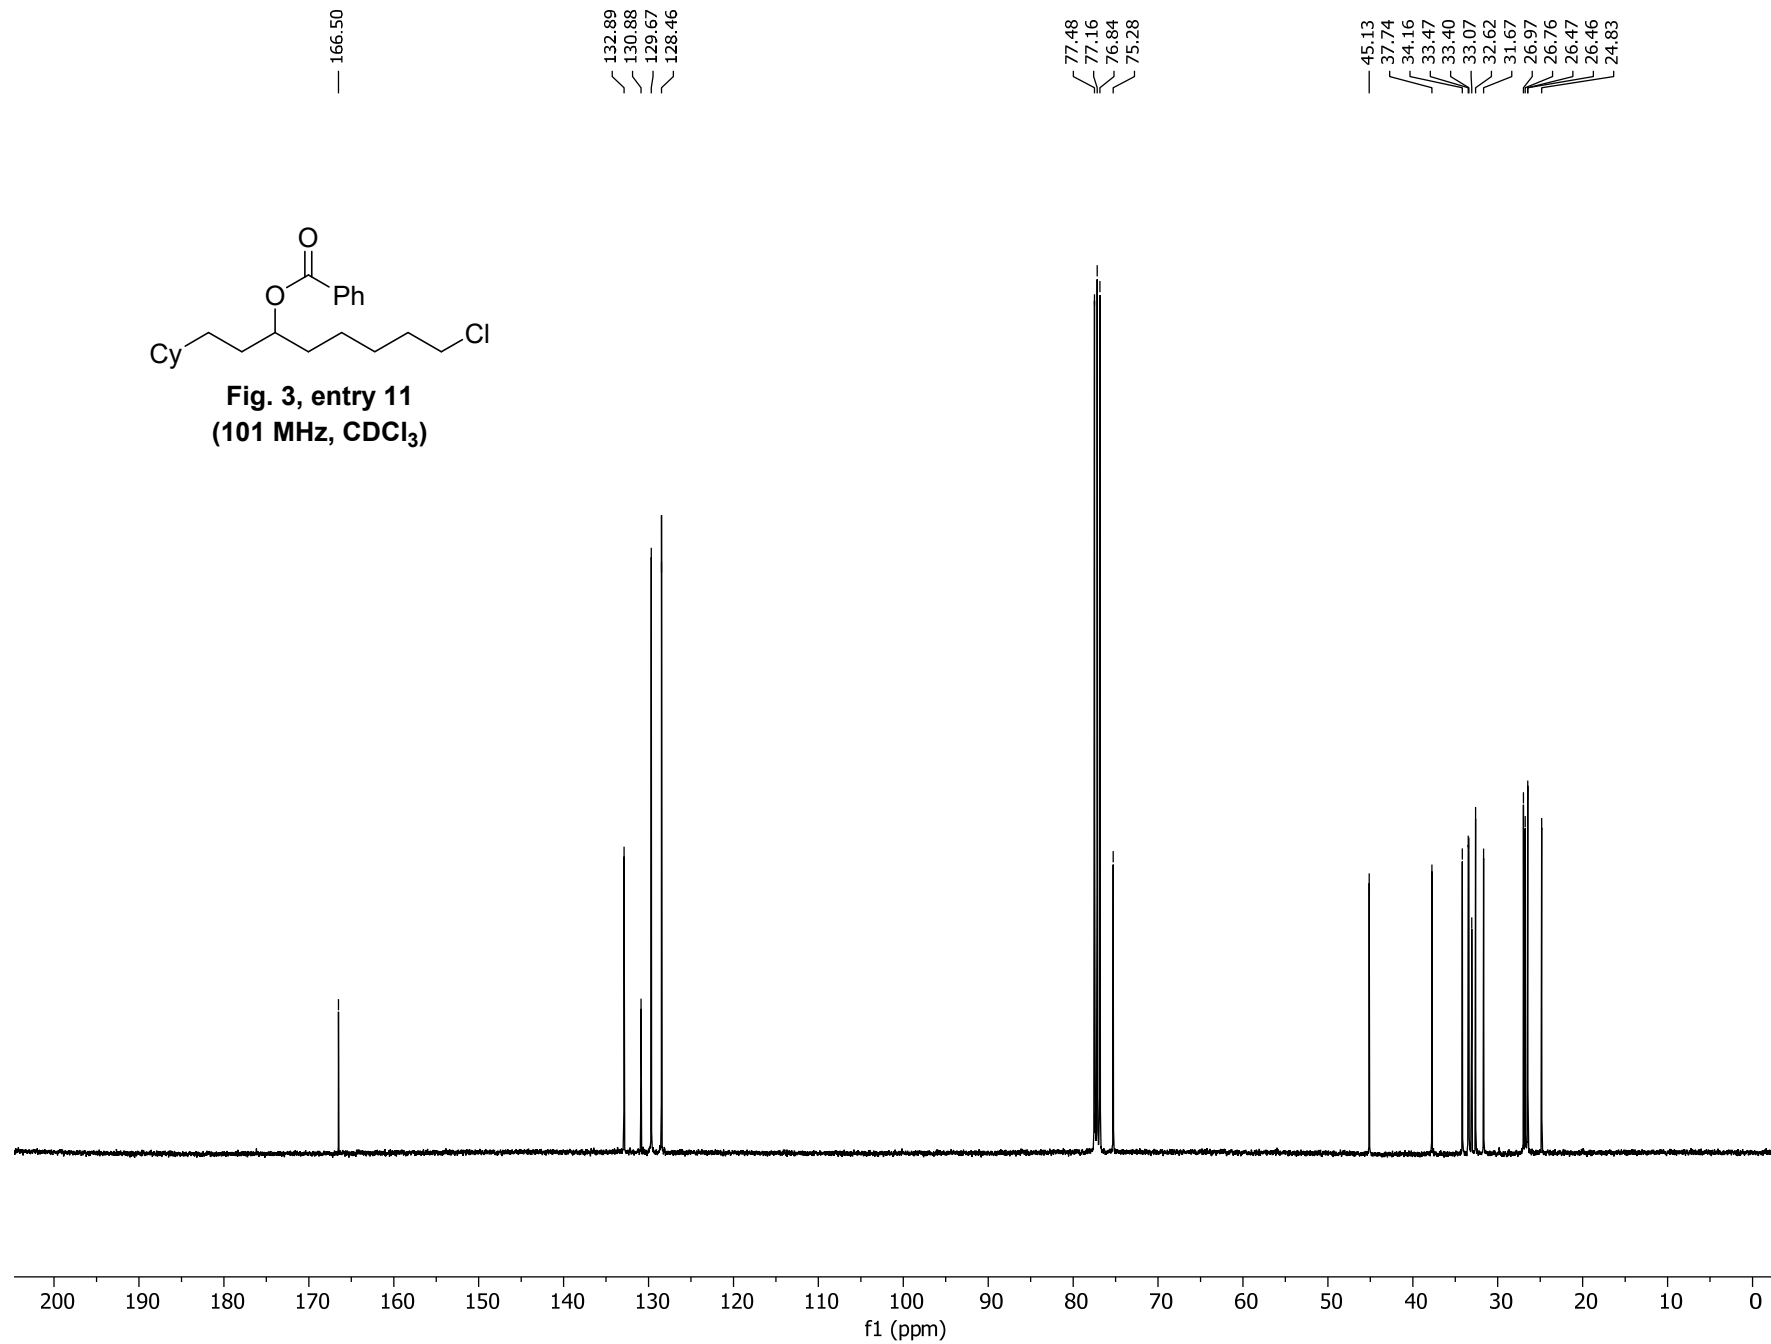

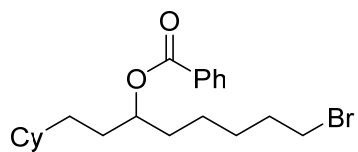

**Fig. 3, entry 12**  
**(400 MHz, CDCl<sub>3</sub>)**

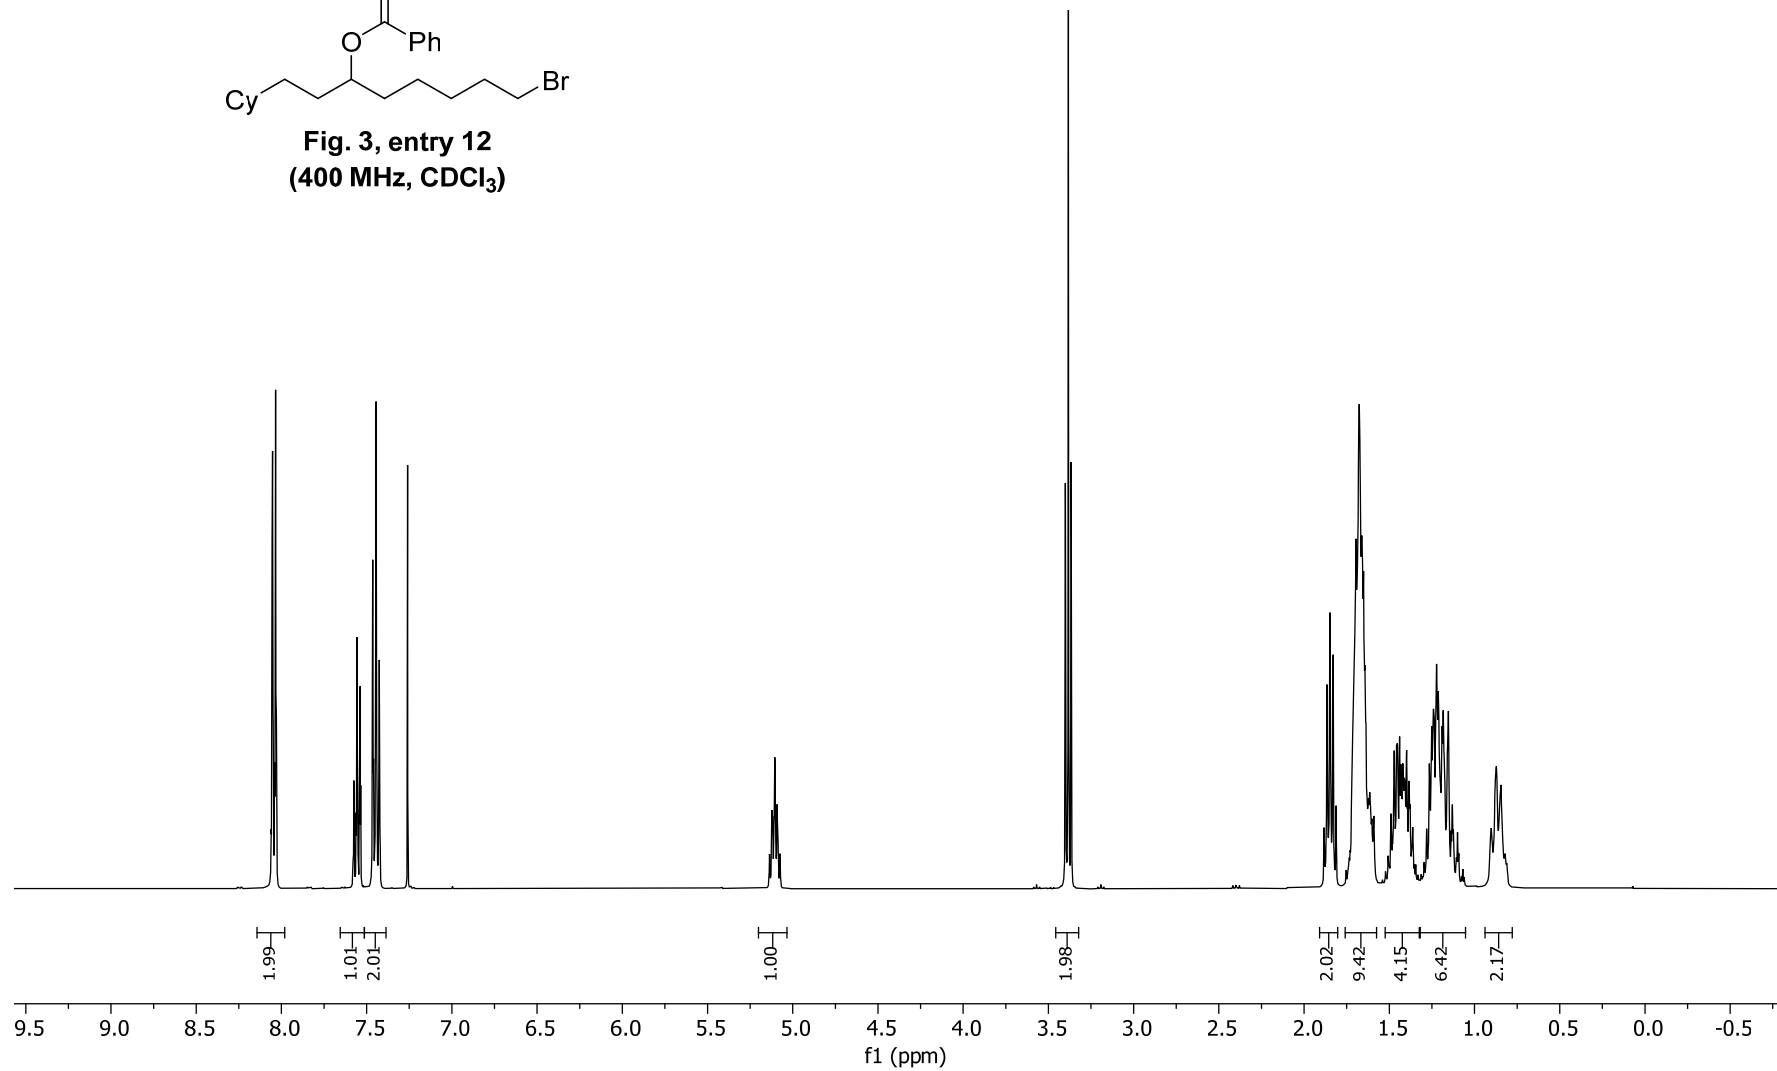

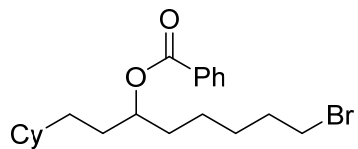

Fig. 3, entry 12  
(101 MHz, CDCl<sub>3</sub>)

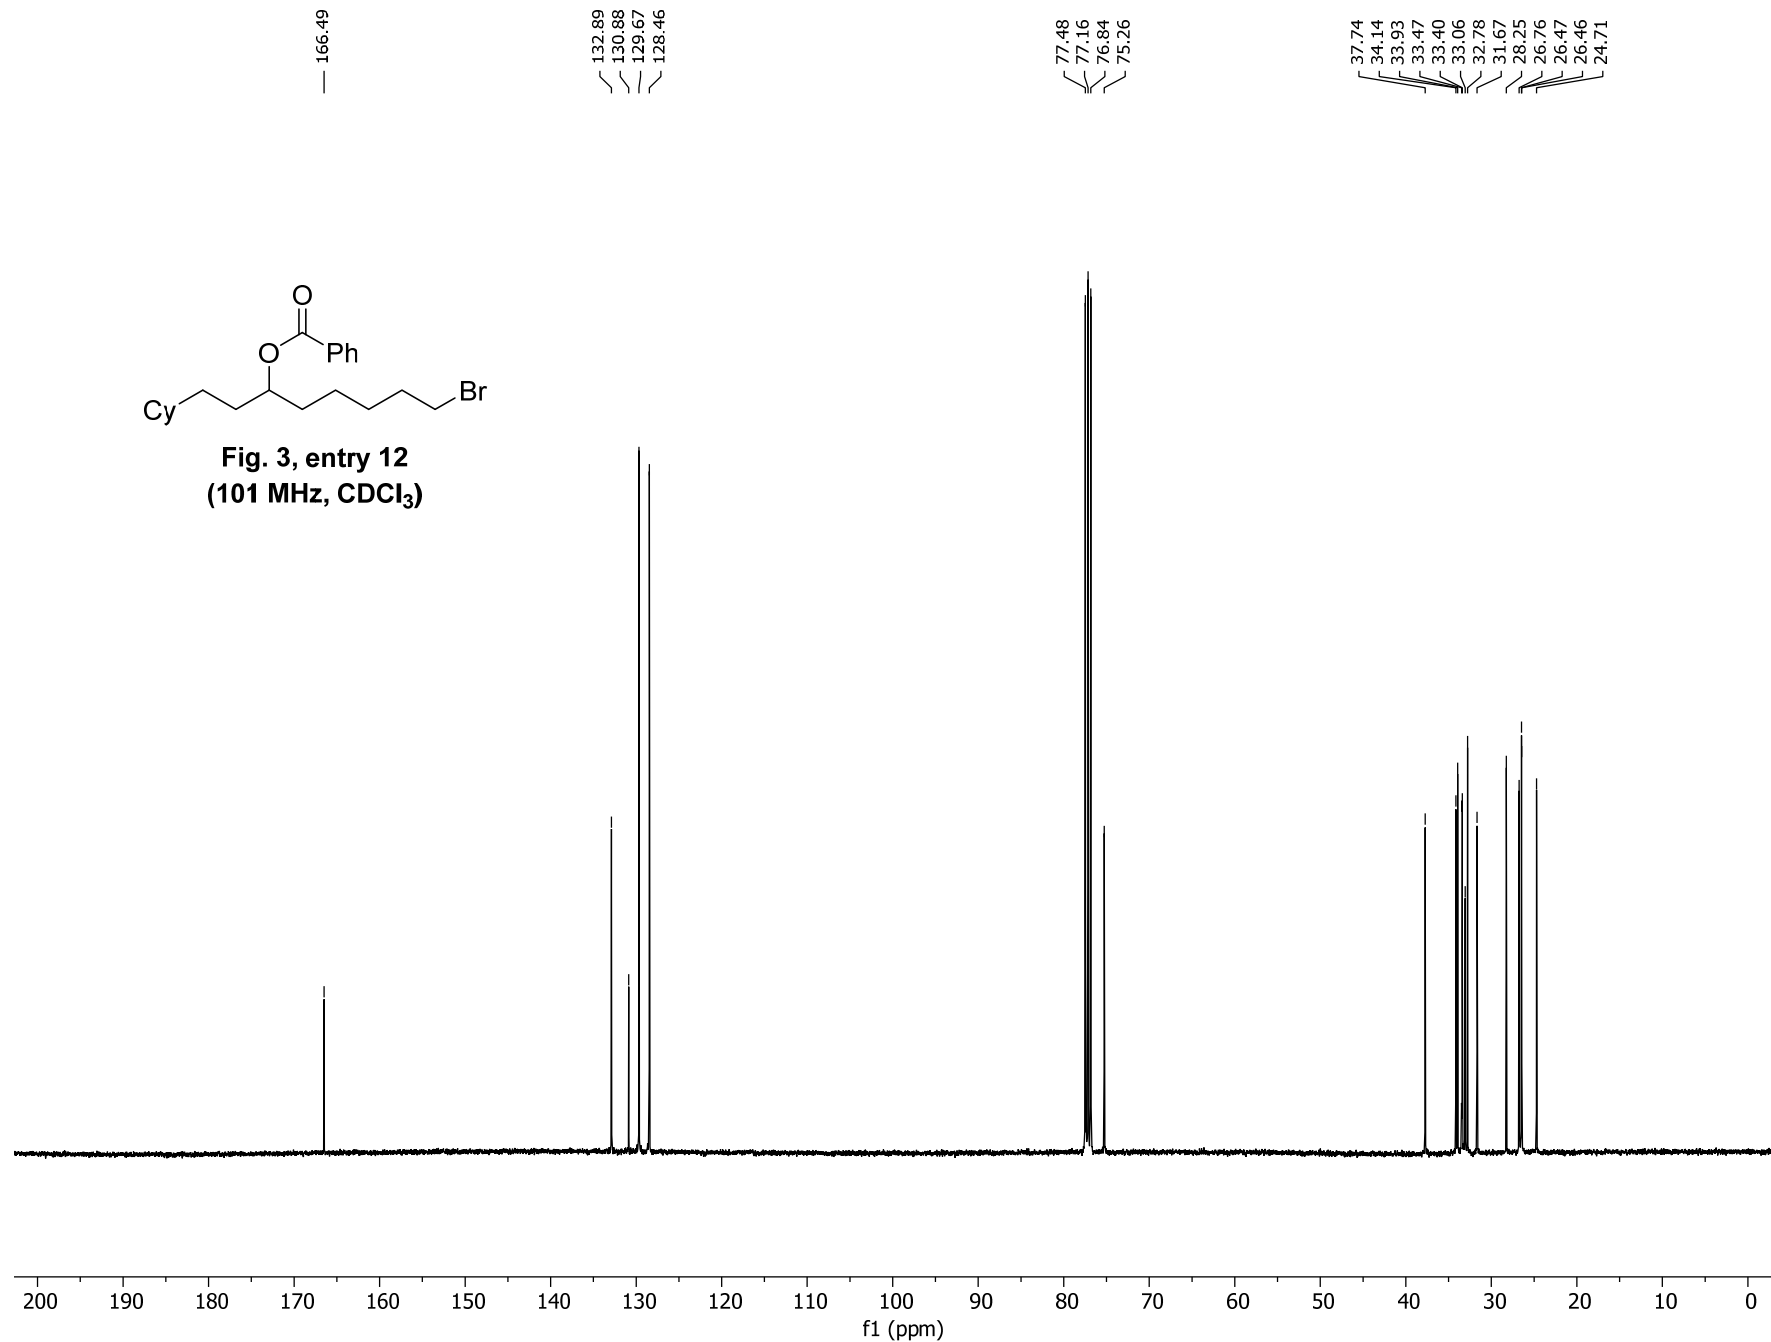



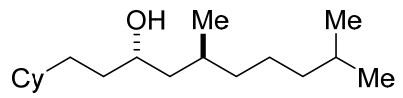

Fig. 3, entry 13  
(400 MHz, CDCl<sub>3</sub>)

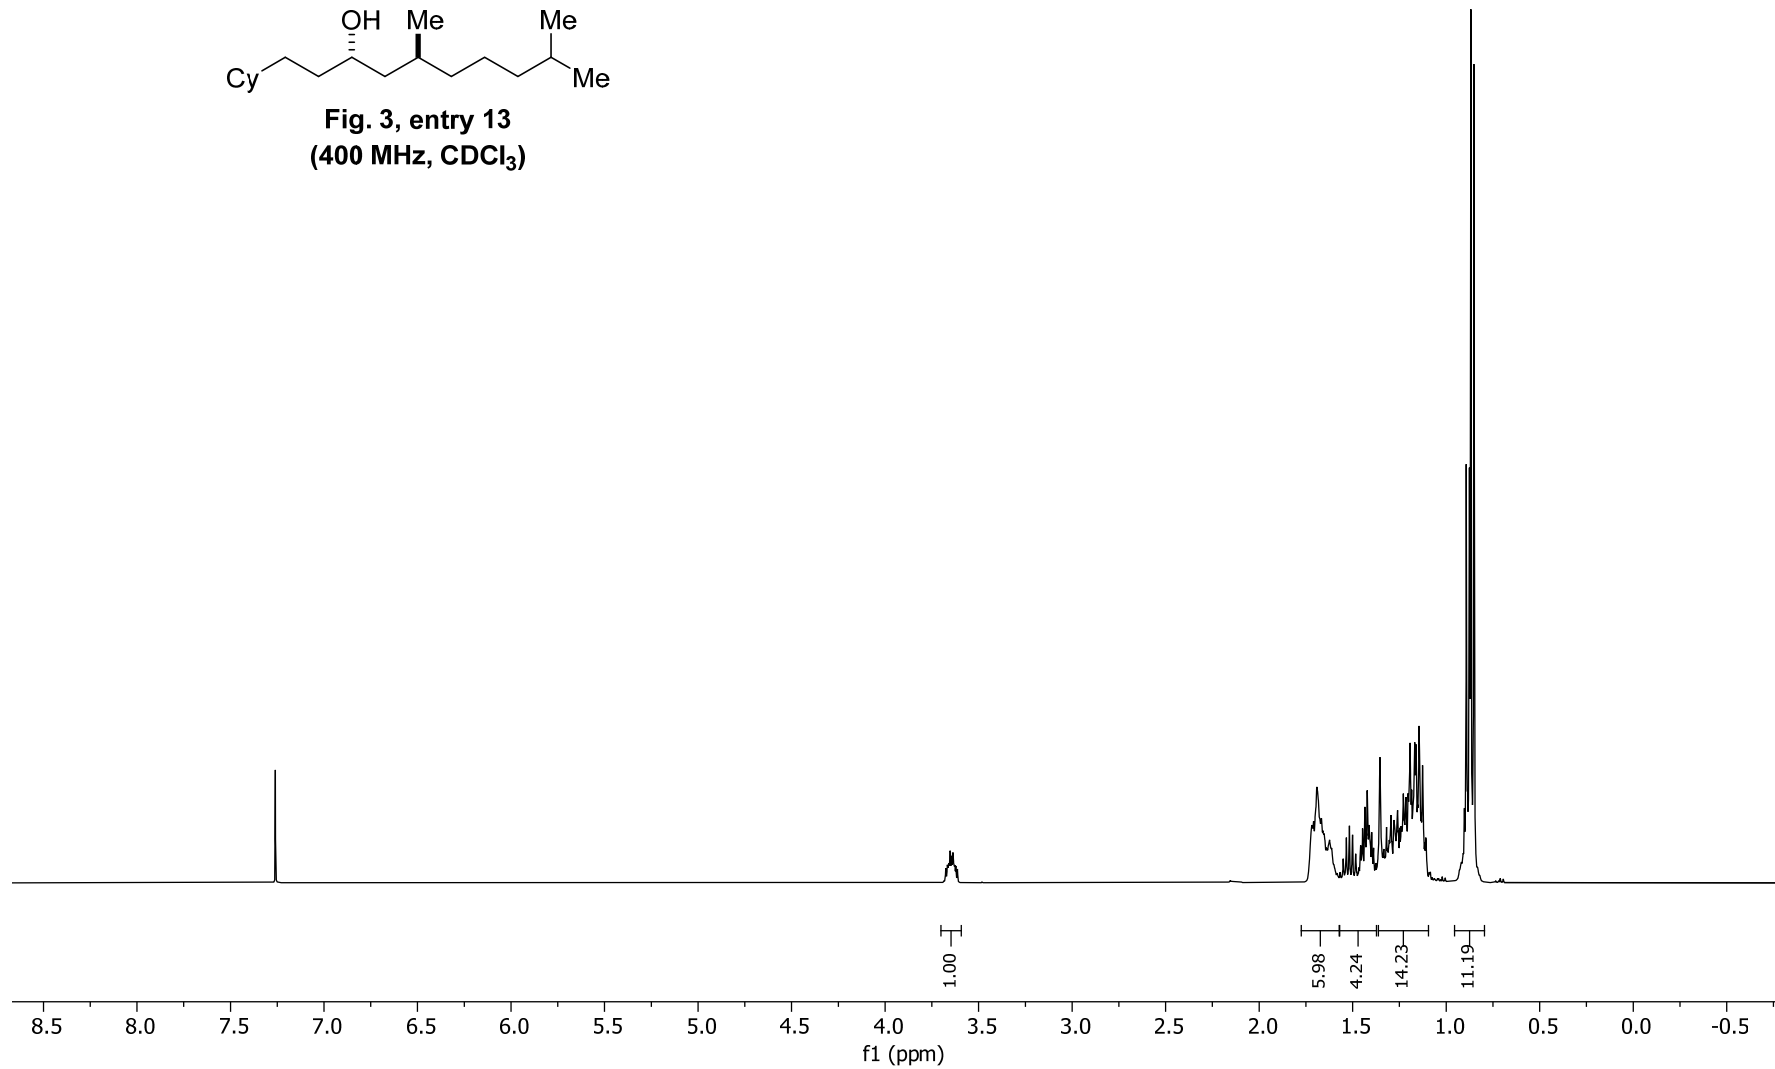

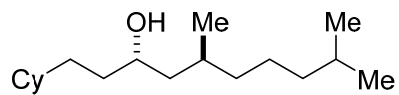

**Fig. 3, entry 13**  
(101 MHz, CDCl<sub>3</sub>)

77.48  
77.16  
76.84

70.17

45.16  
39.41  
38.30  
37.95  
35.81  
33.63  
33.54  
33.47  
29.38  
28.11  
26.83  
26.54  
26.52  
24.86  
22.84  
22.76  
19.44

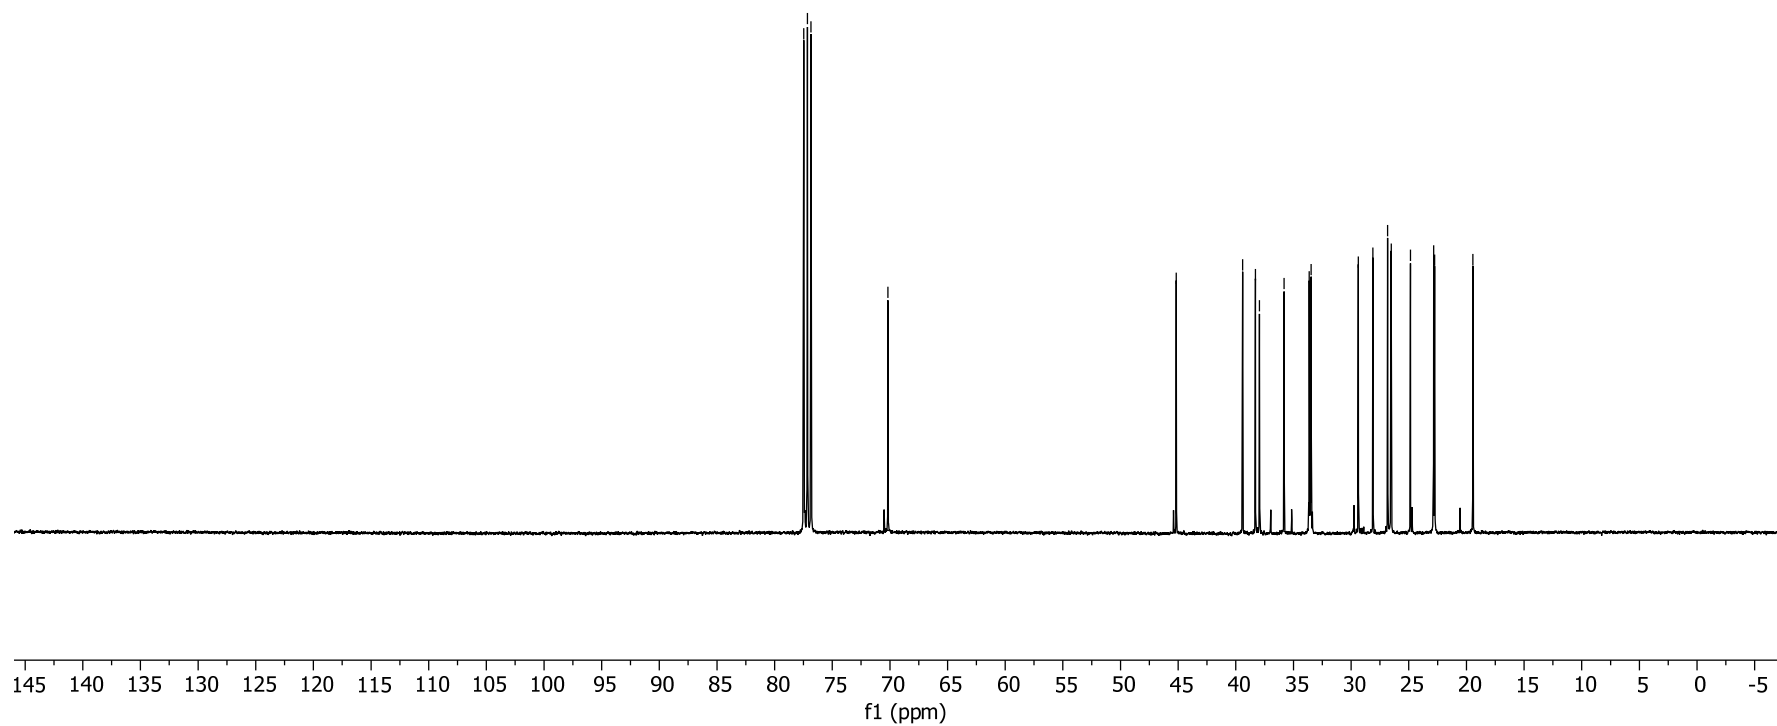

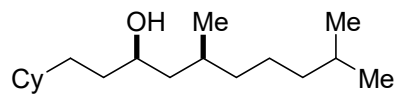

**Fig. 3, entry 14**  
**(400 MHz, CDCl<sub>3</sub>)**

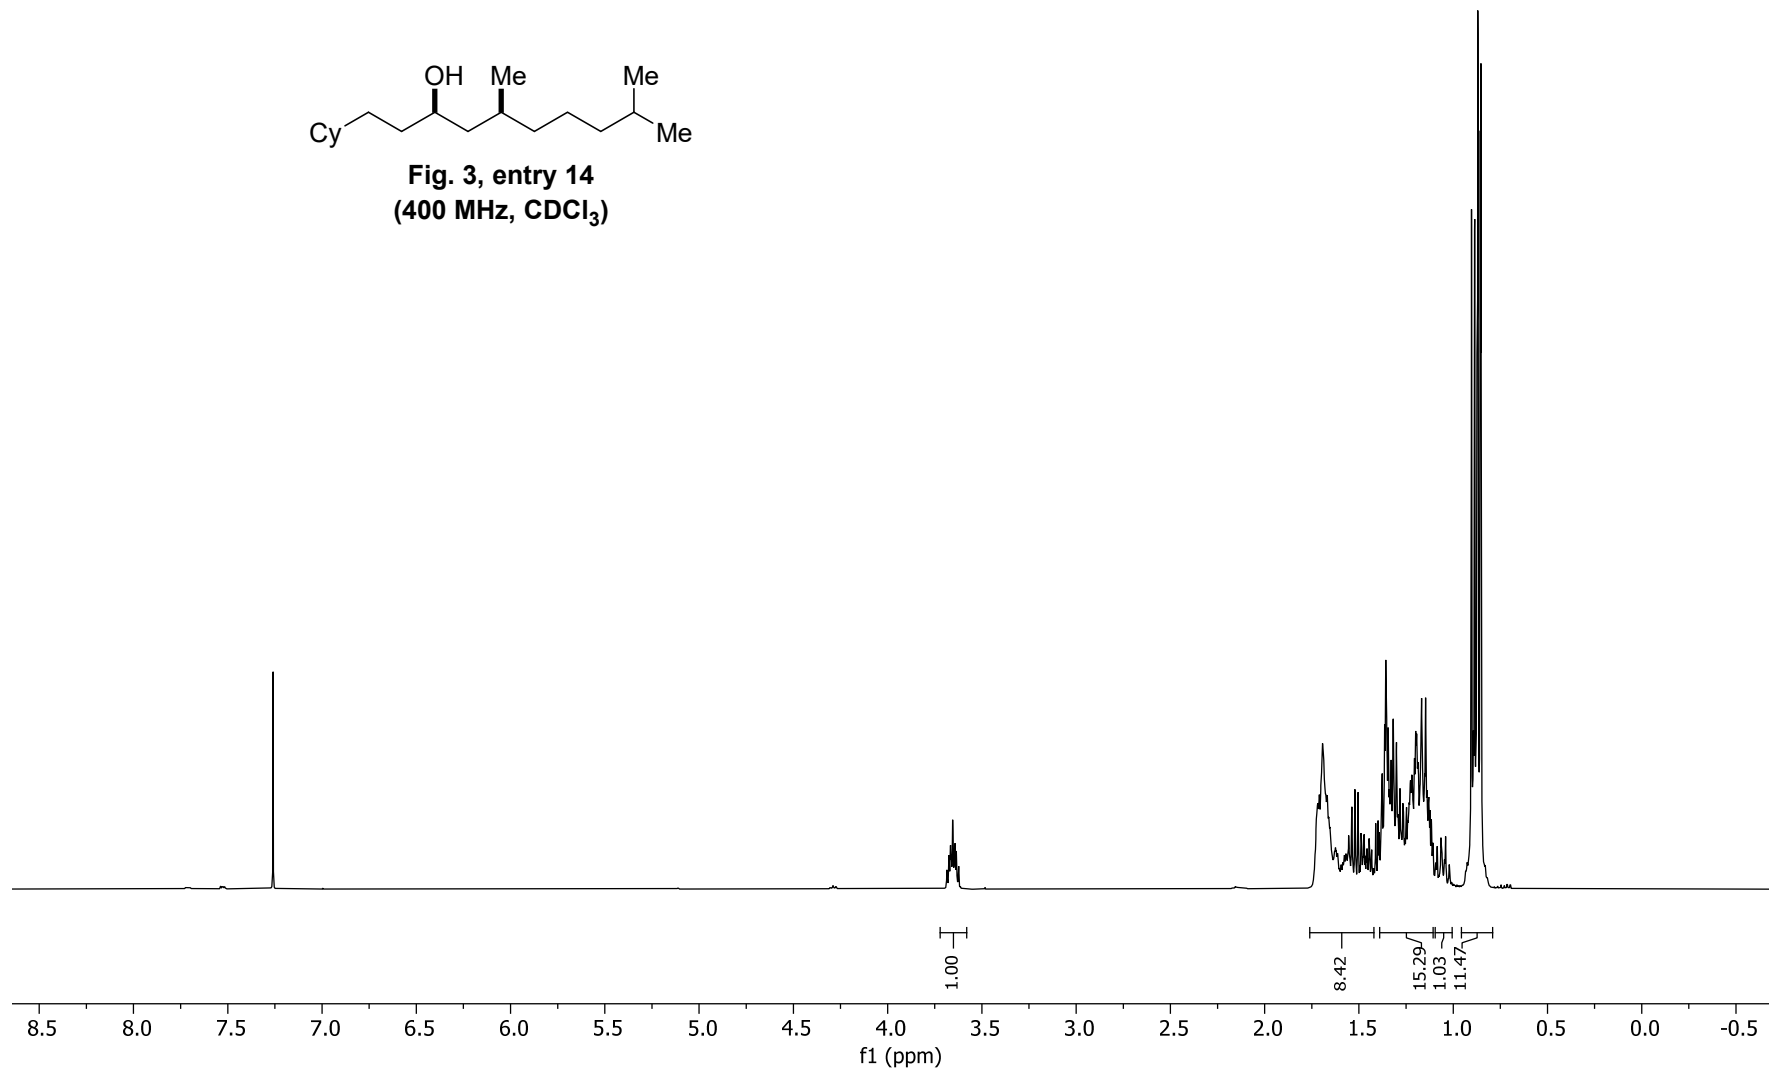

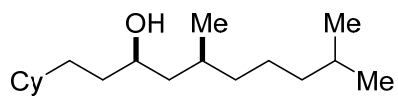

**Fig. 3, entry 14**  
**(101 MHz, CDCl<sub>3</sub>)**

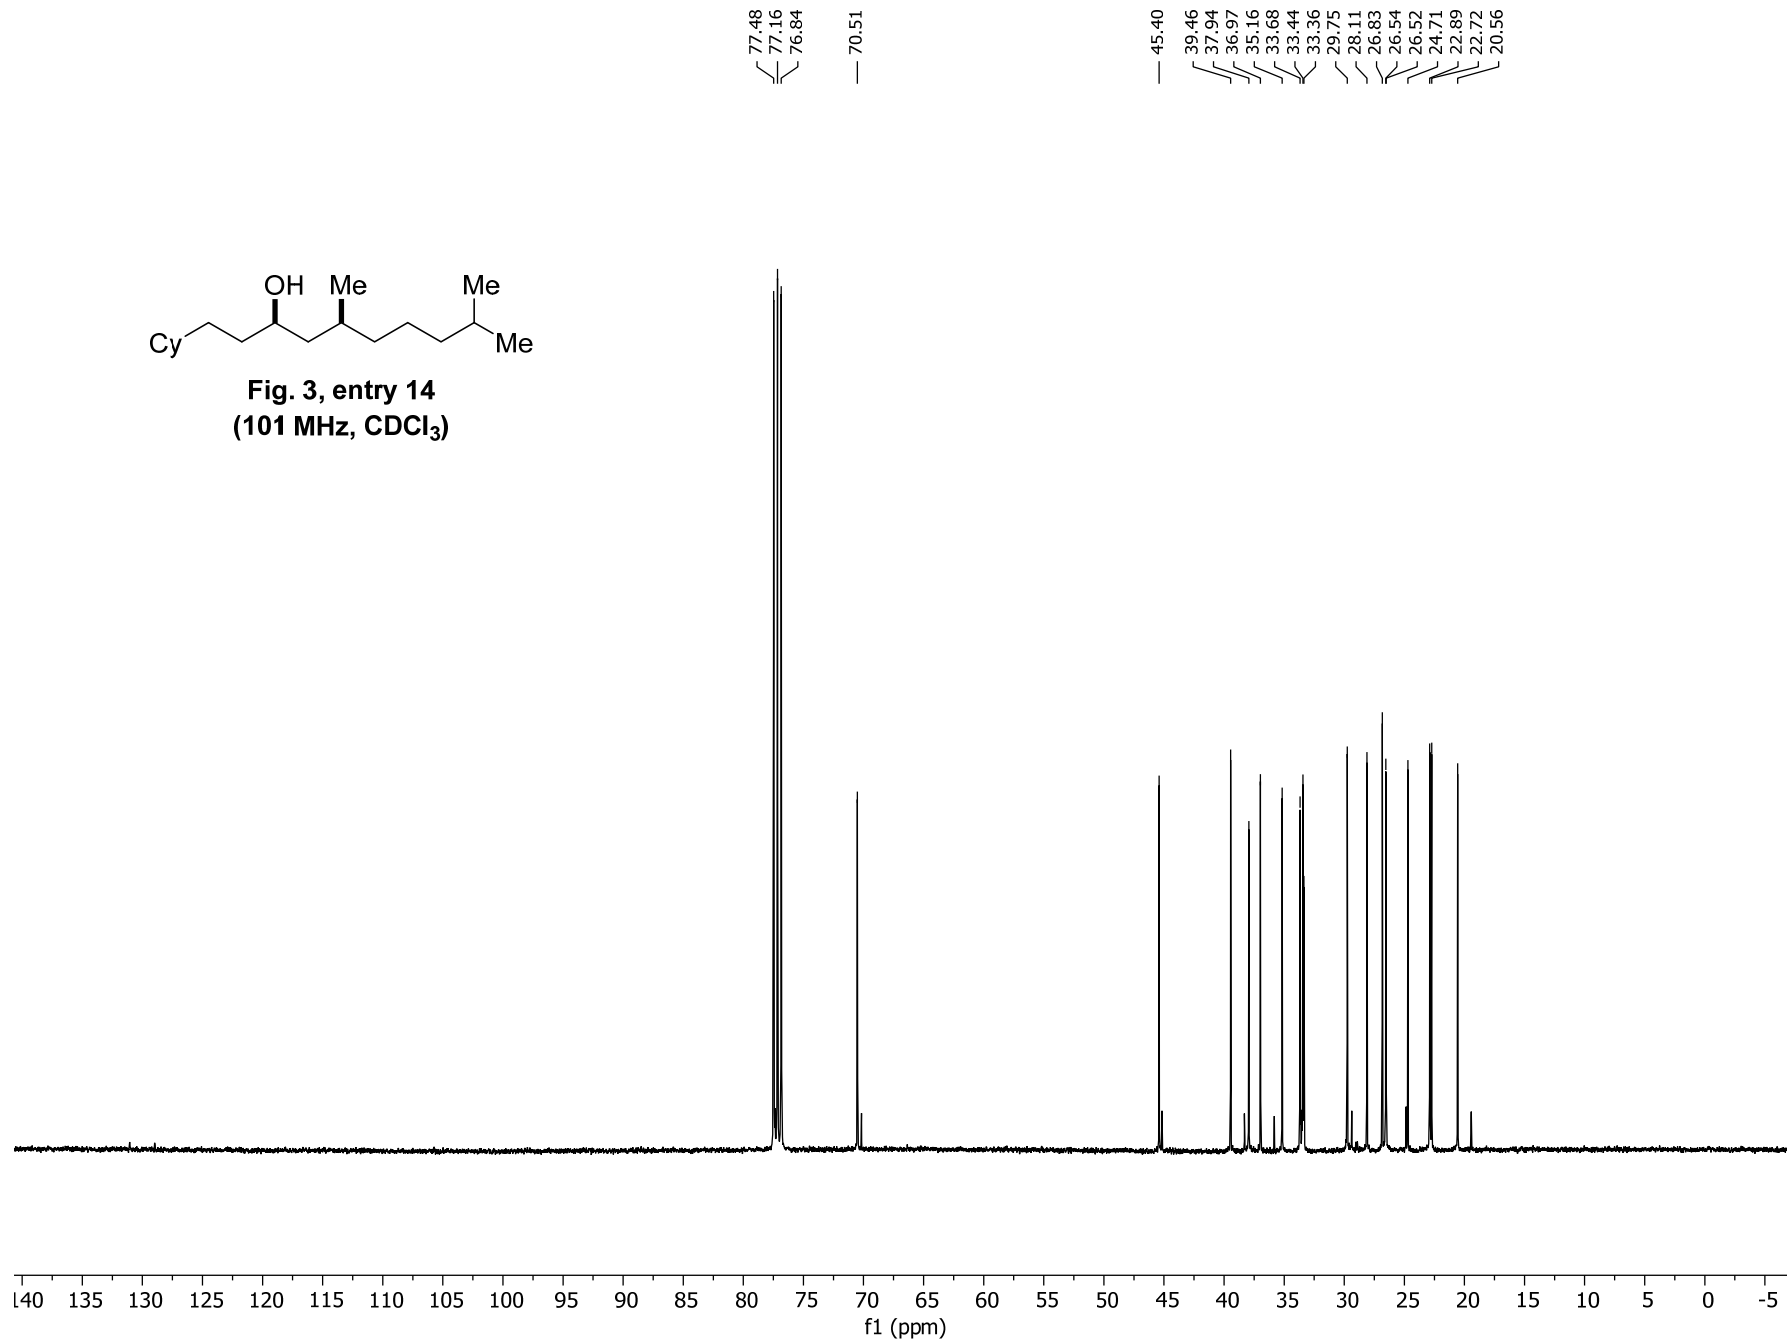

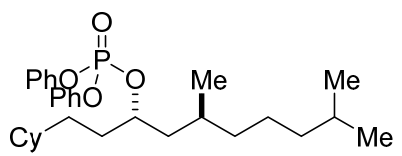

(400 MHz, CDCl<sub>3</sub>)

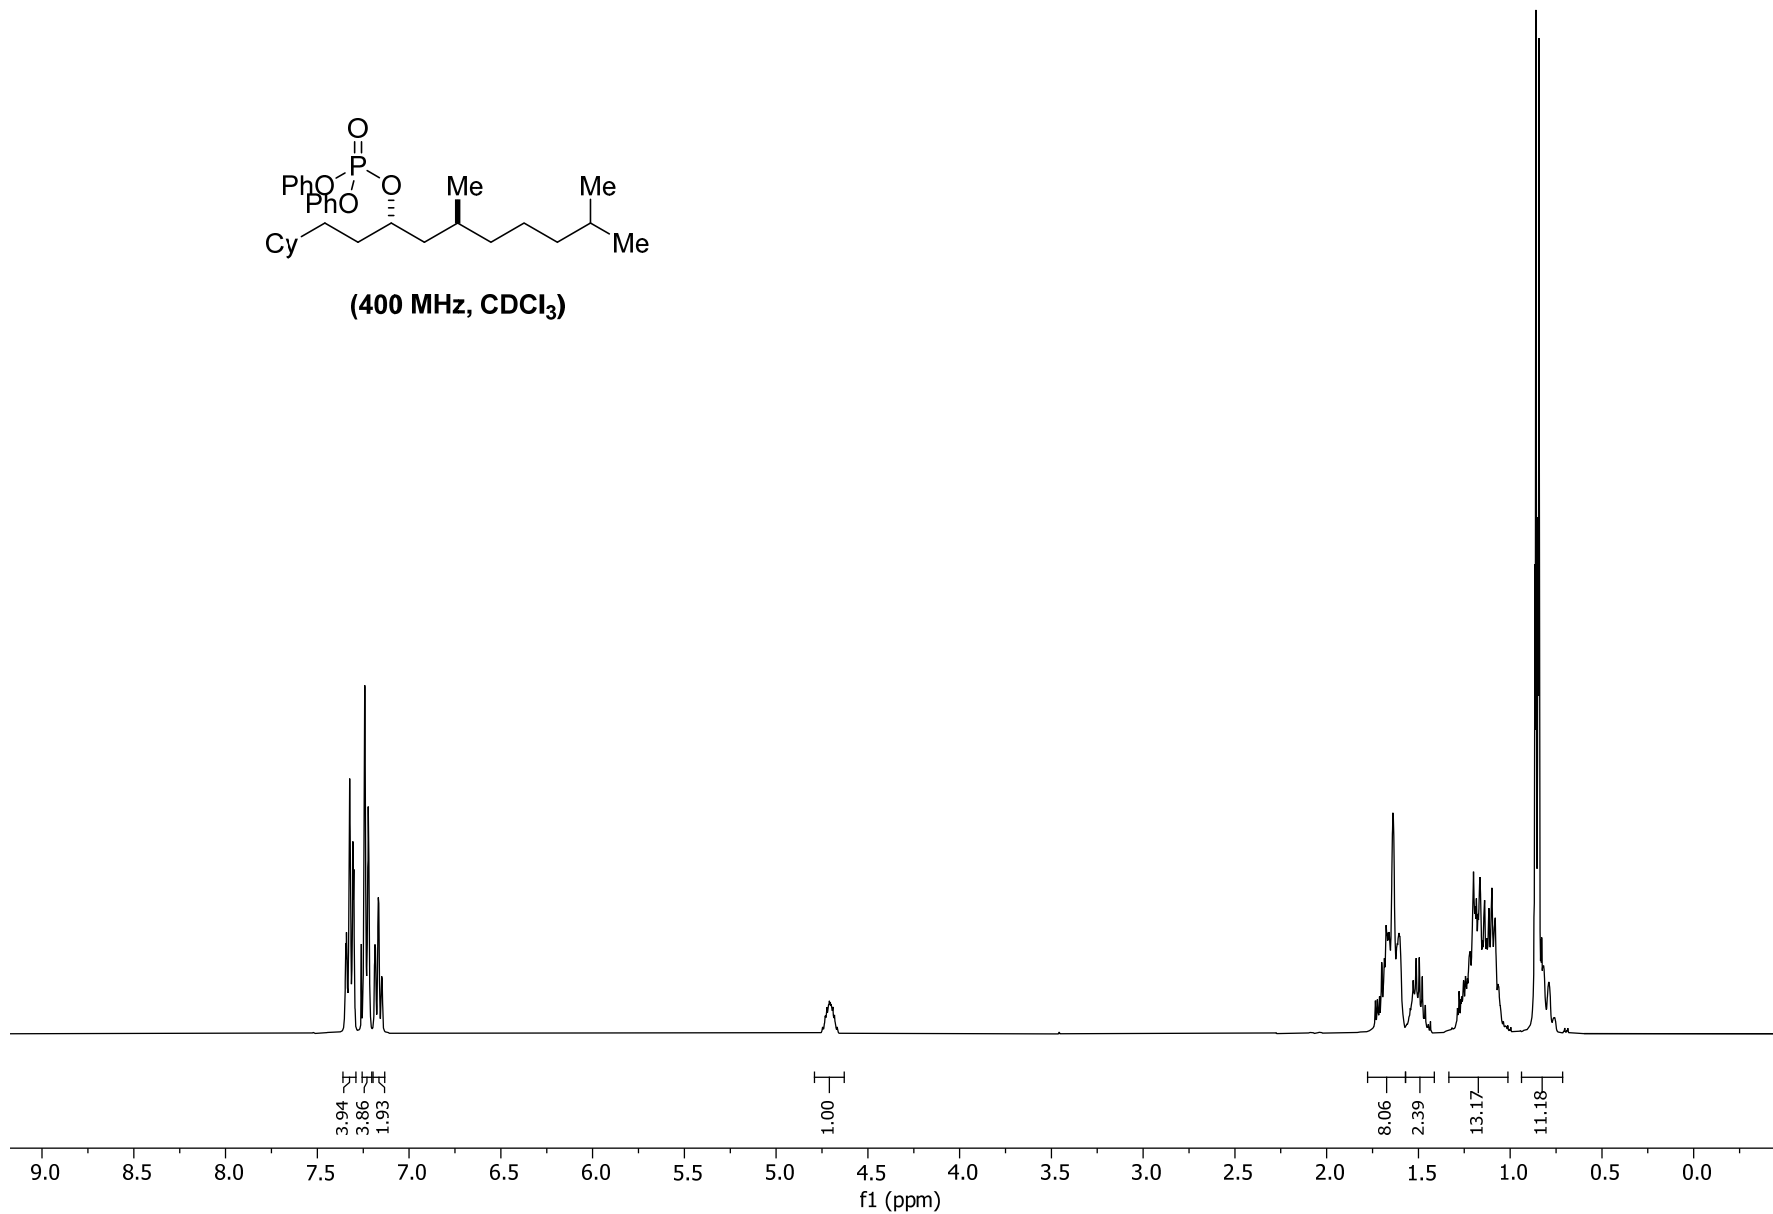

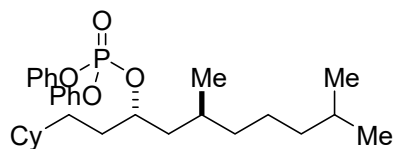

(101 MHz, CDCl<sub>3</sub>)

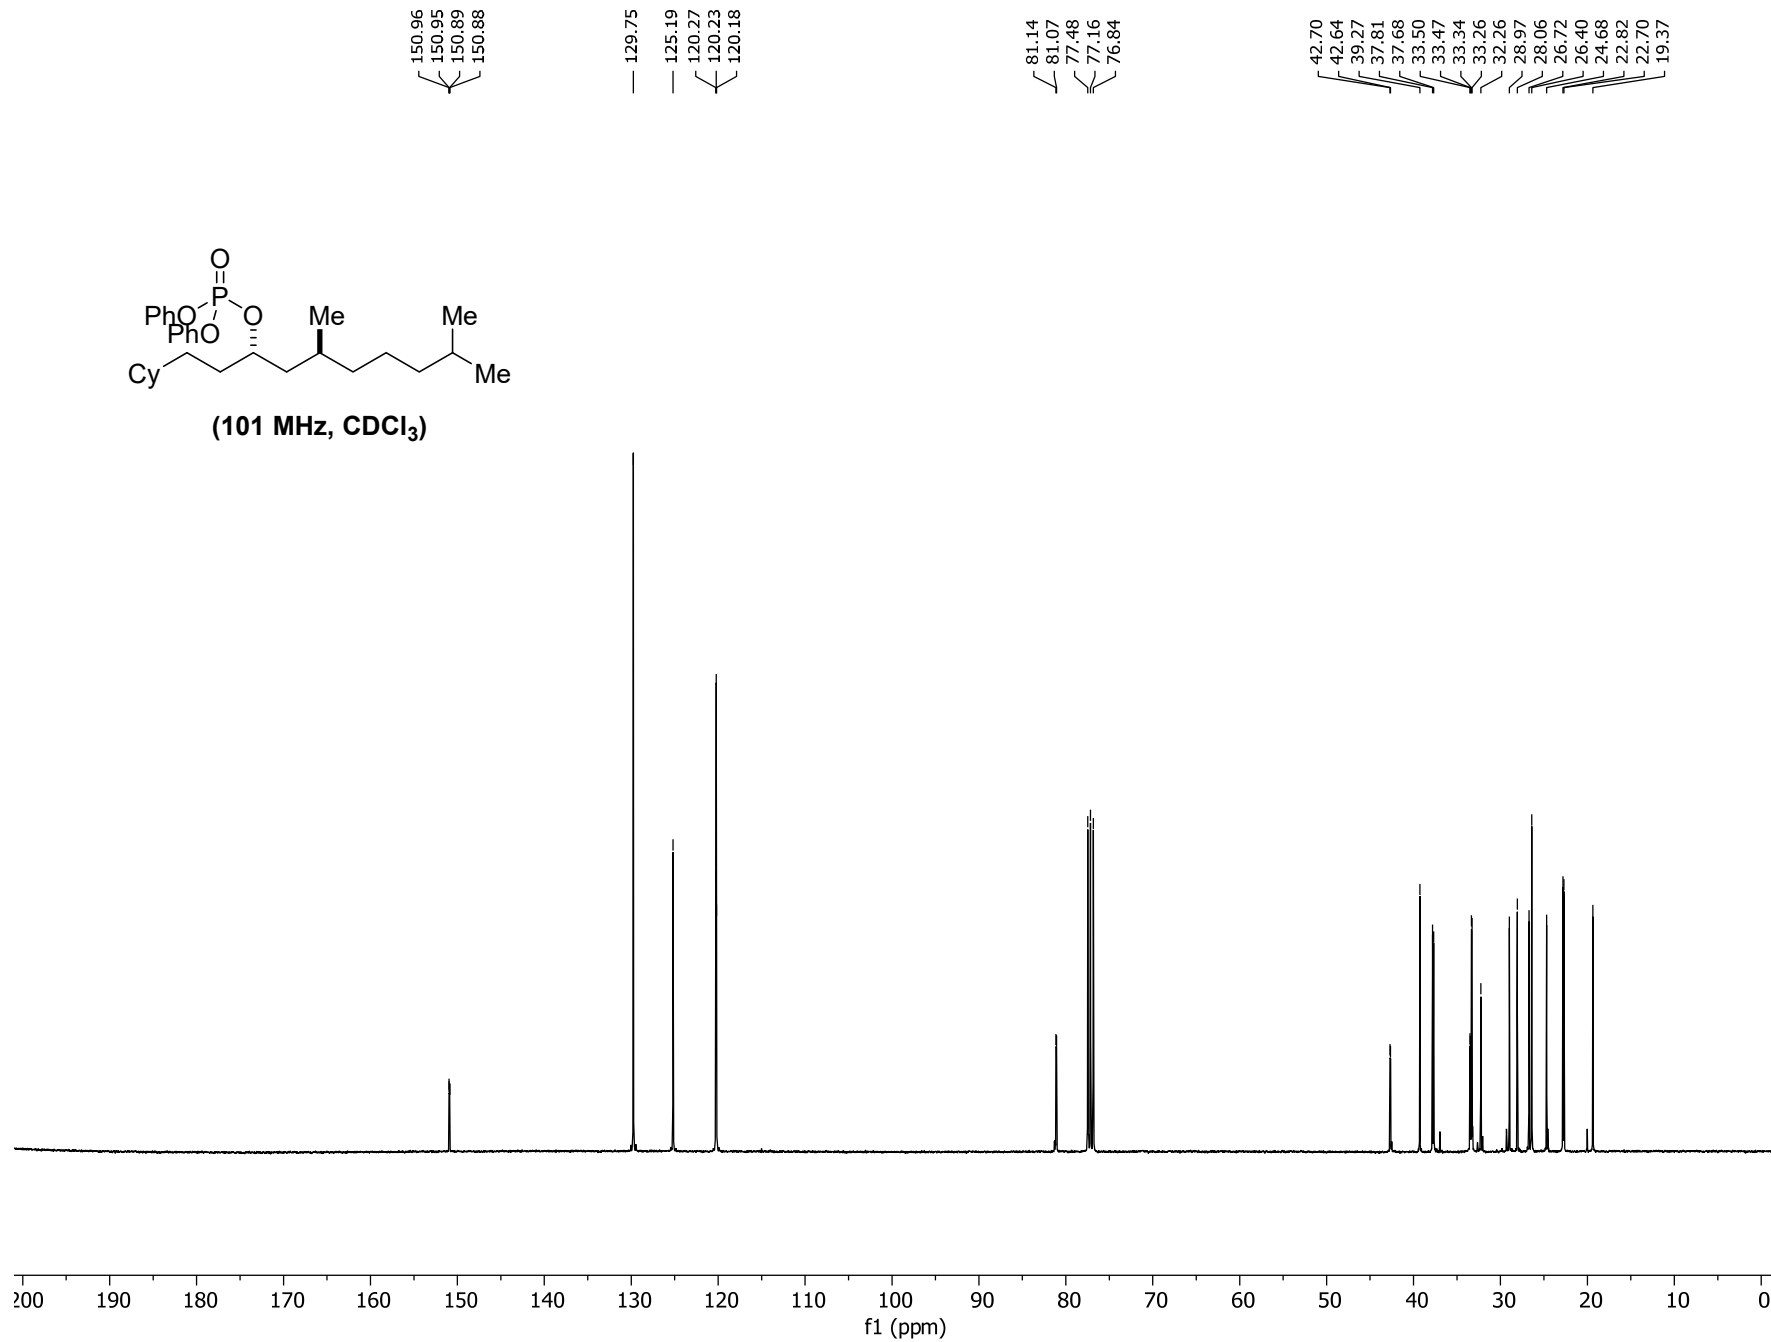

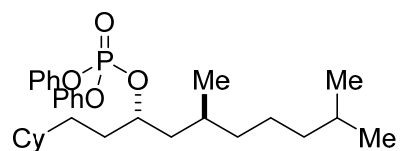

(162 MHz, CDCl<sub>3</sub>)

— -12.42

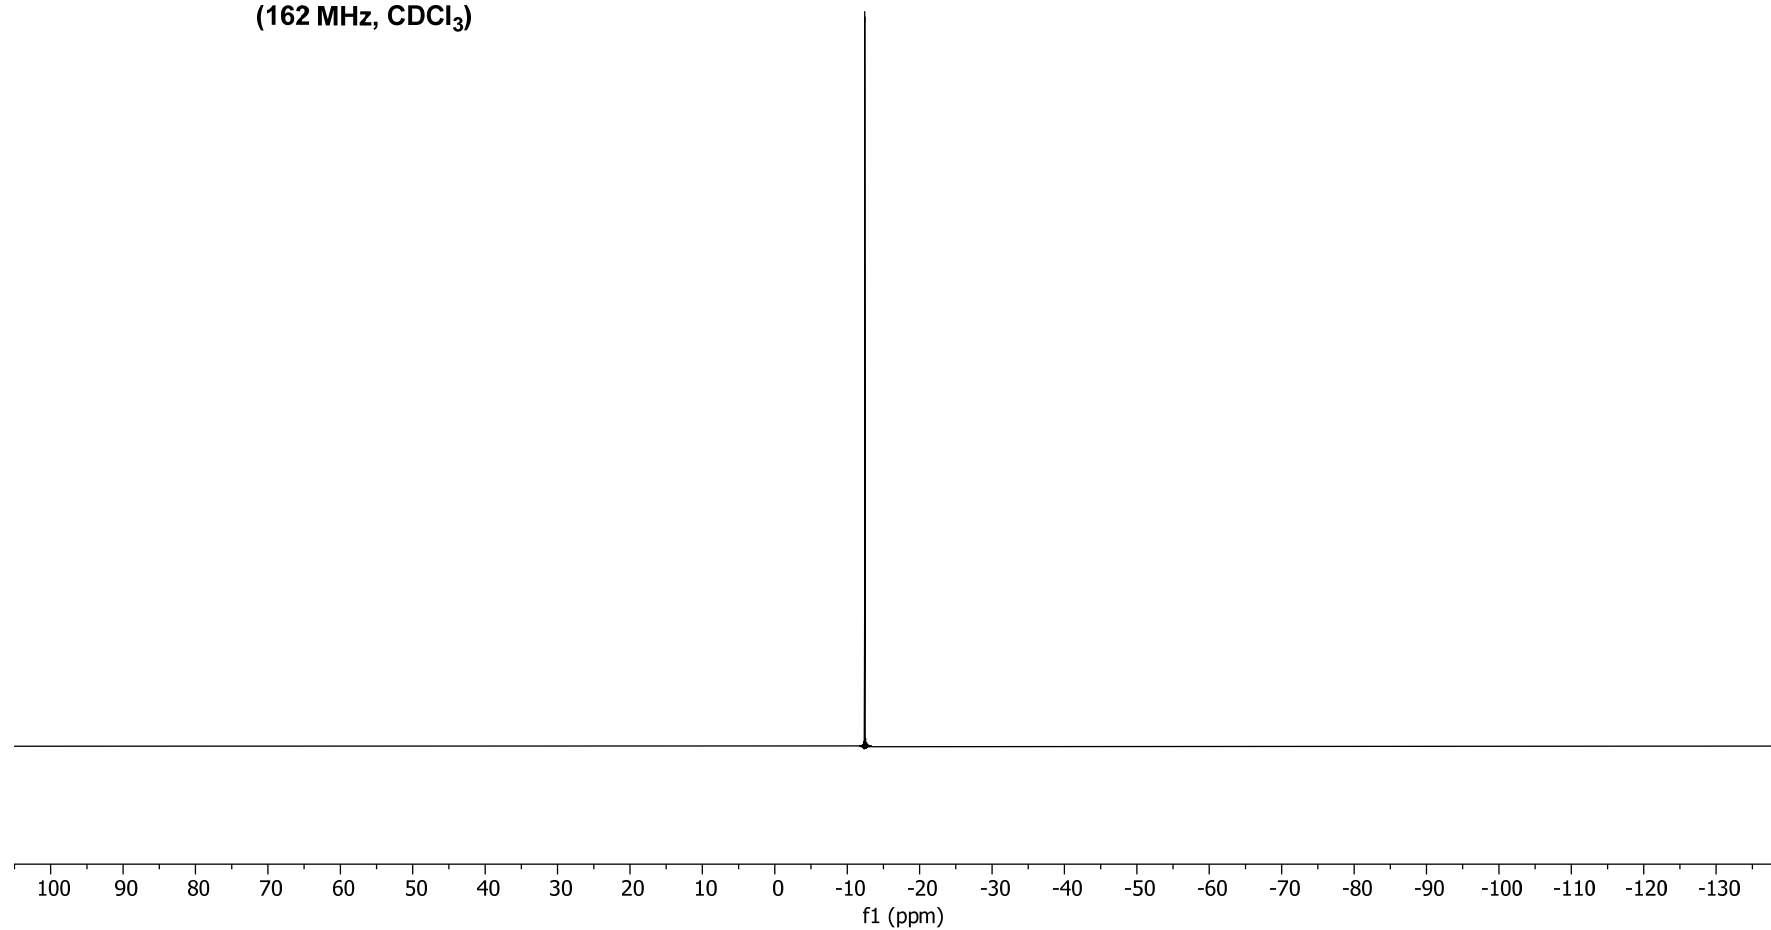

S-95

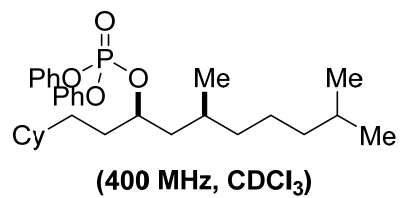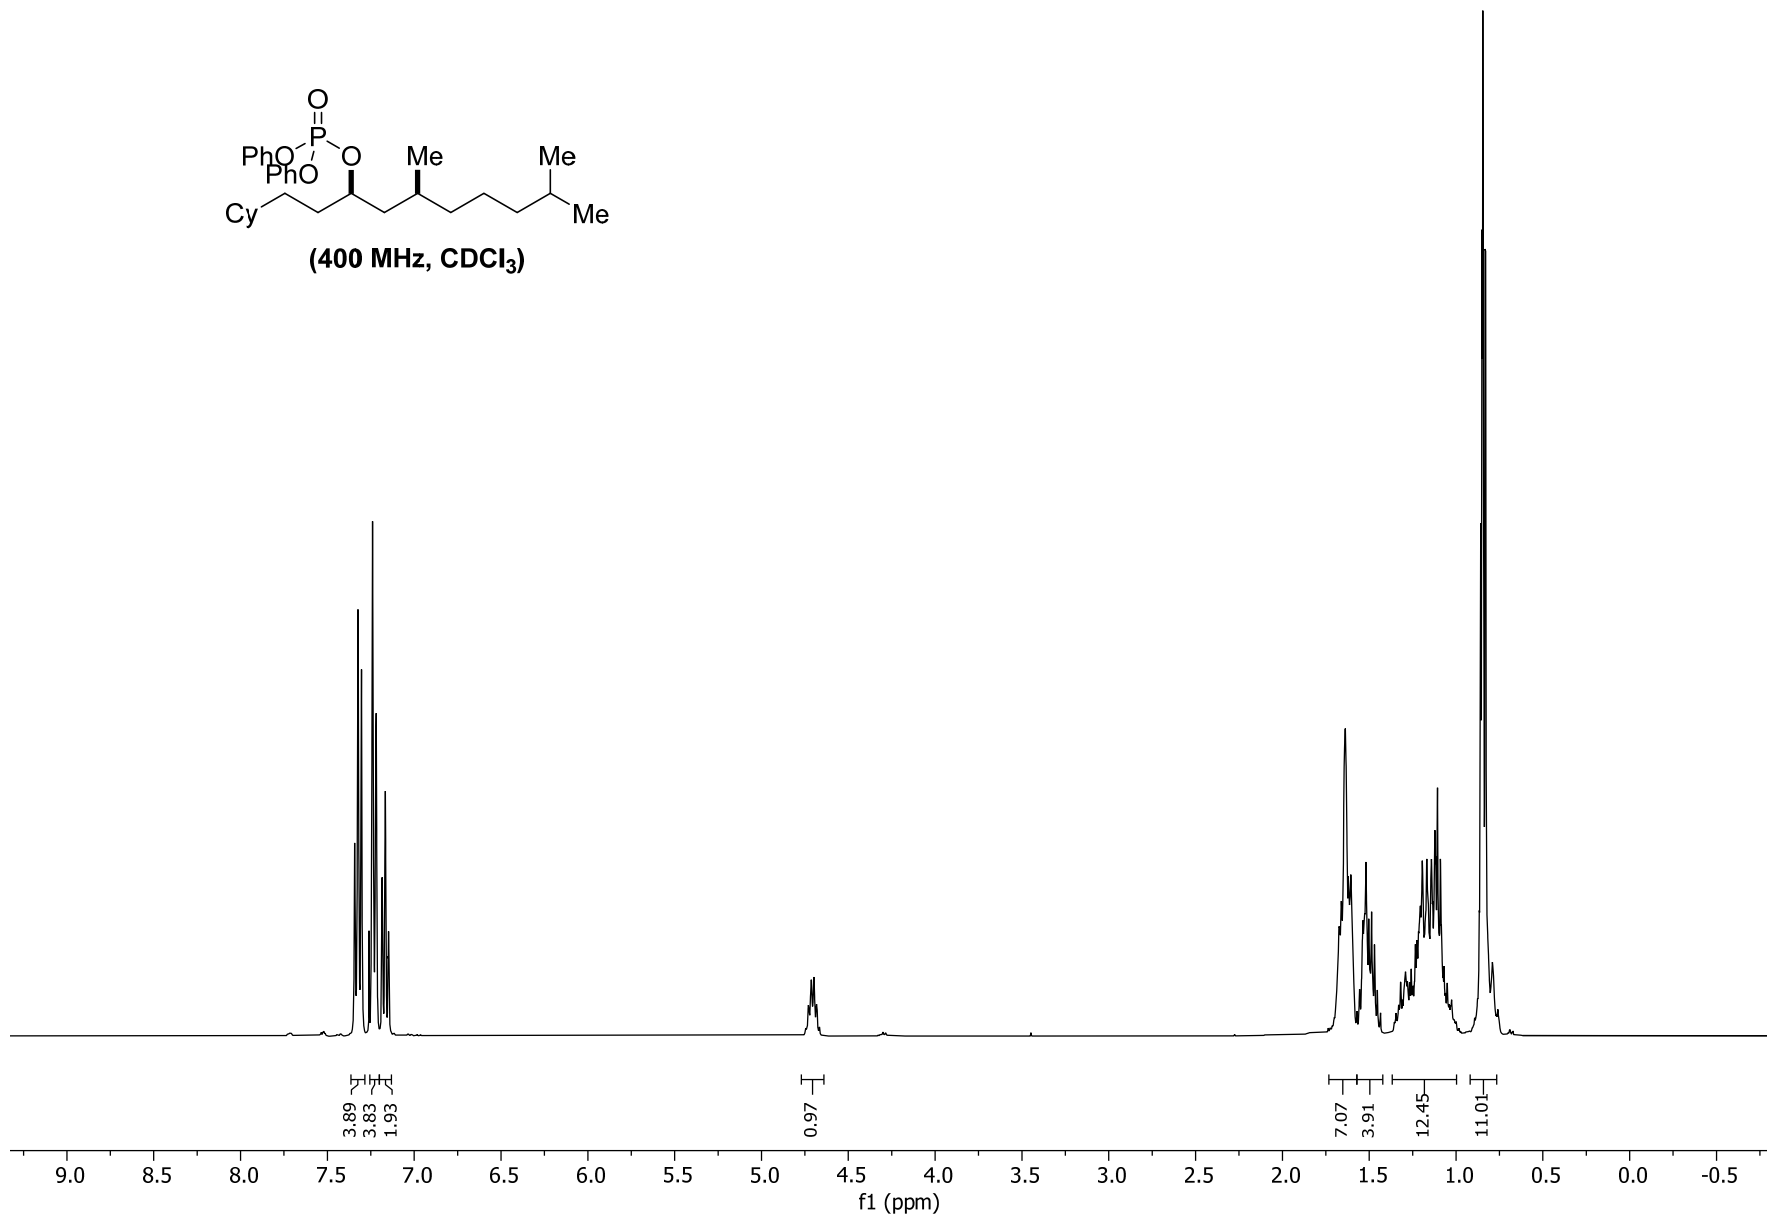

S-96



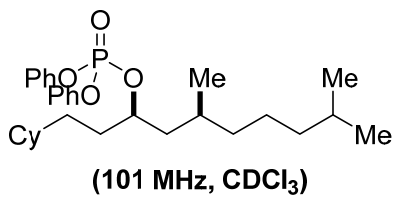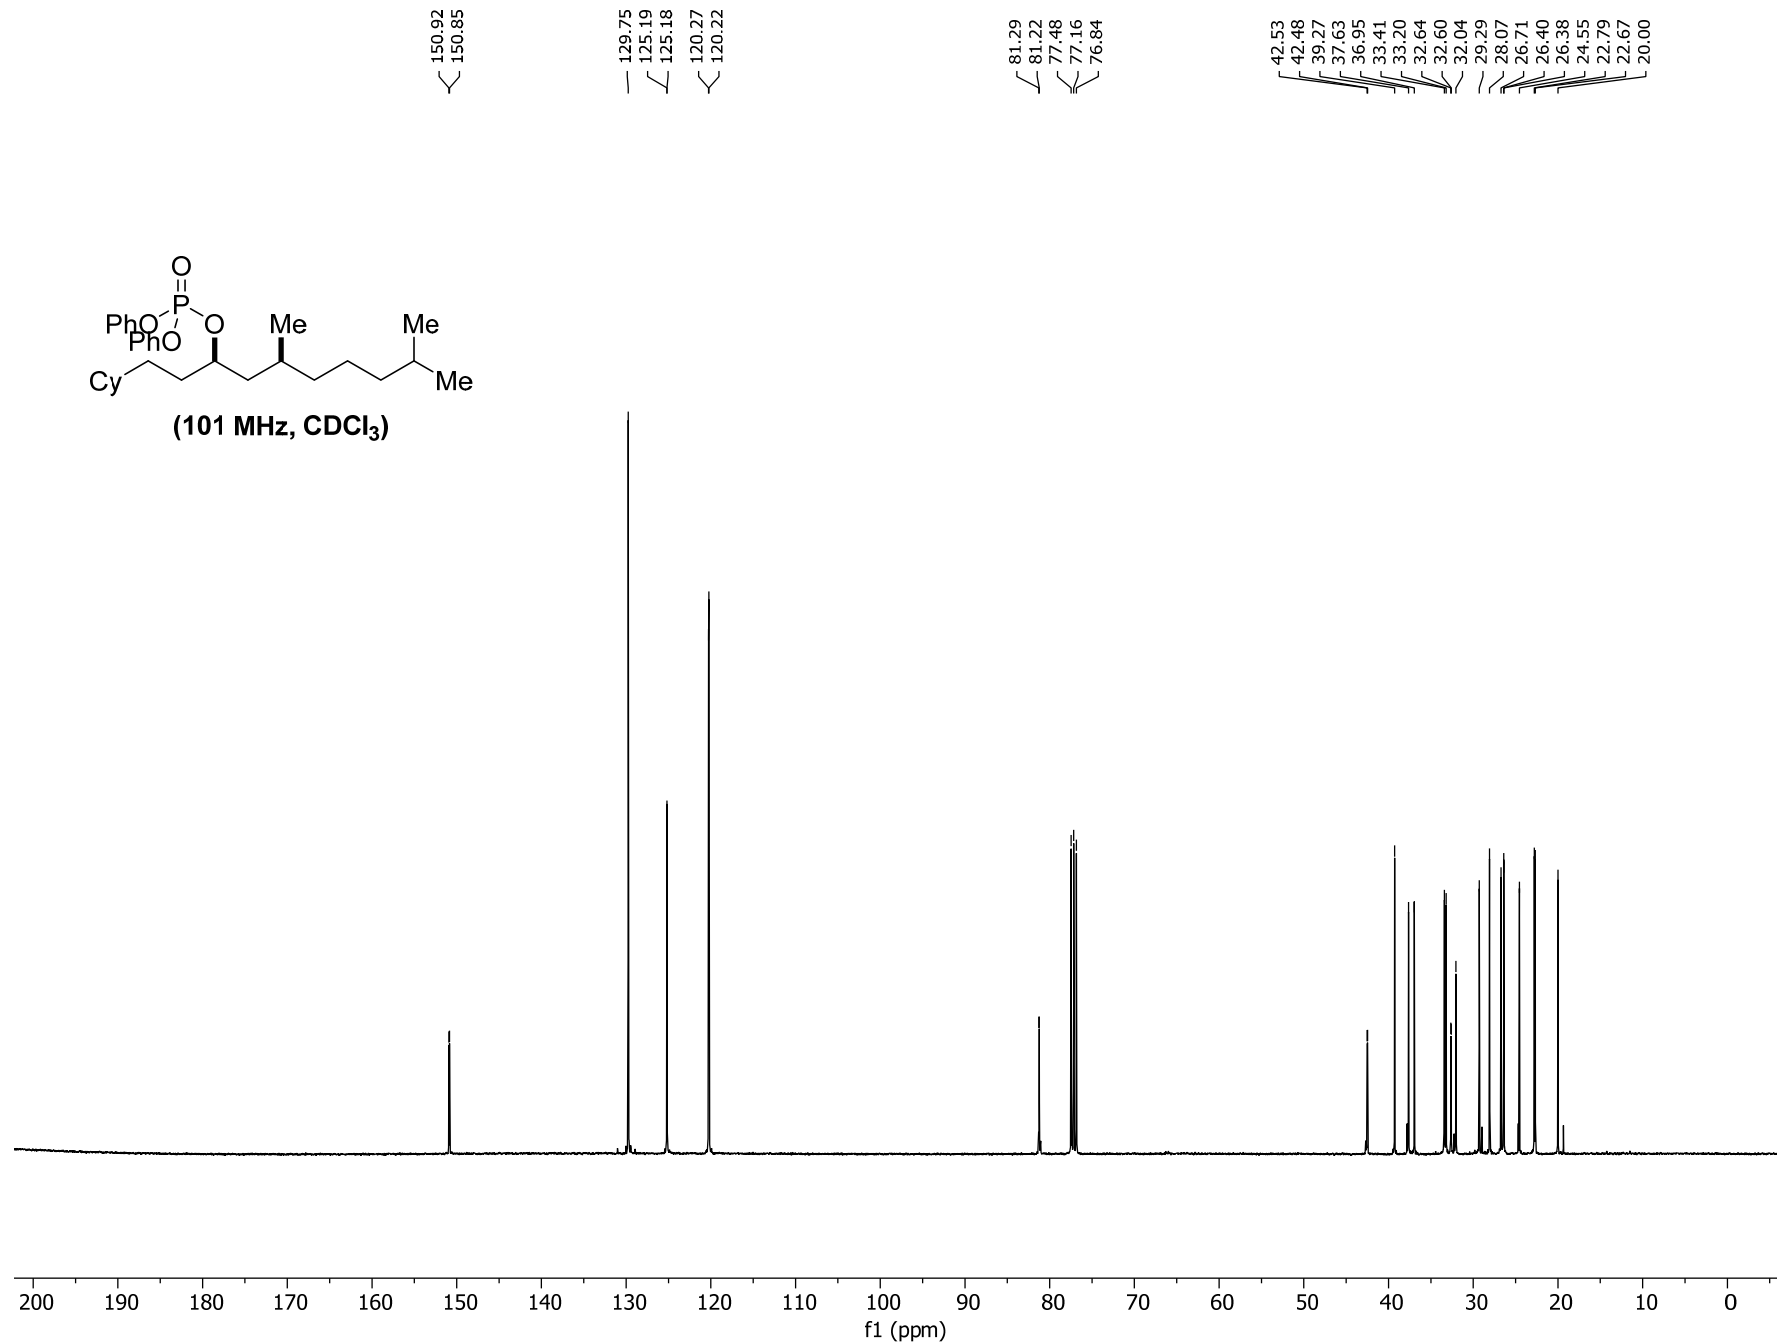

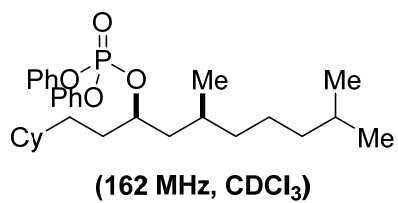

— -12.42

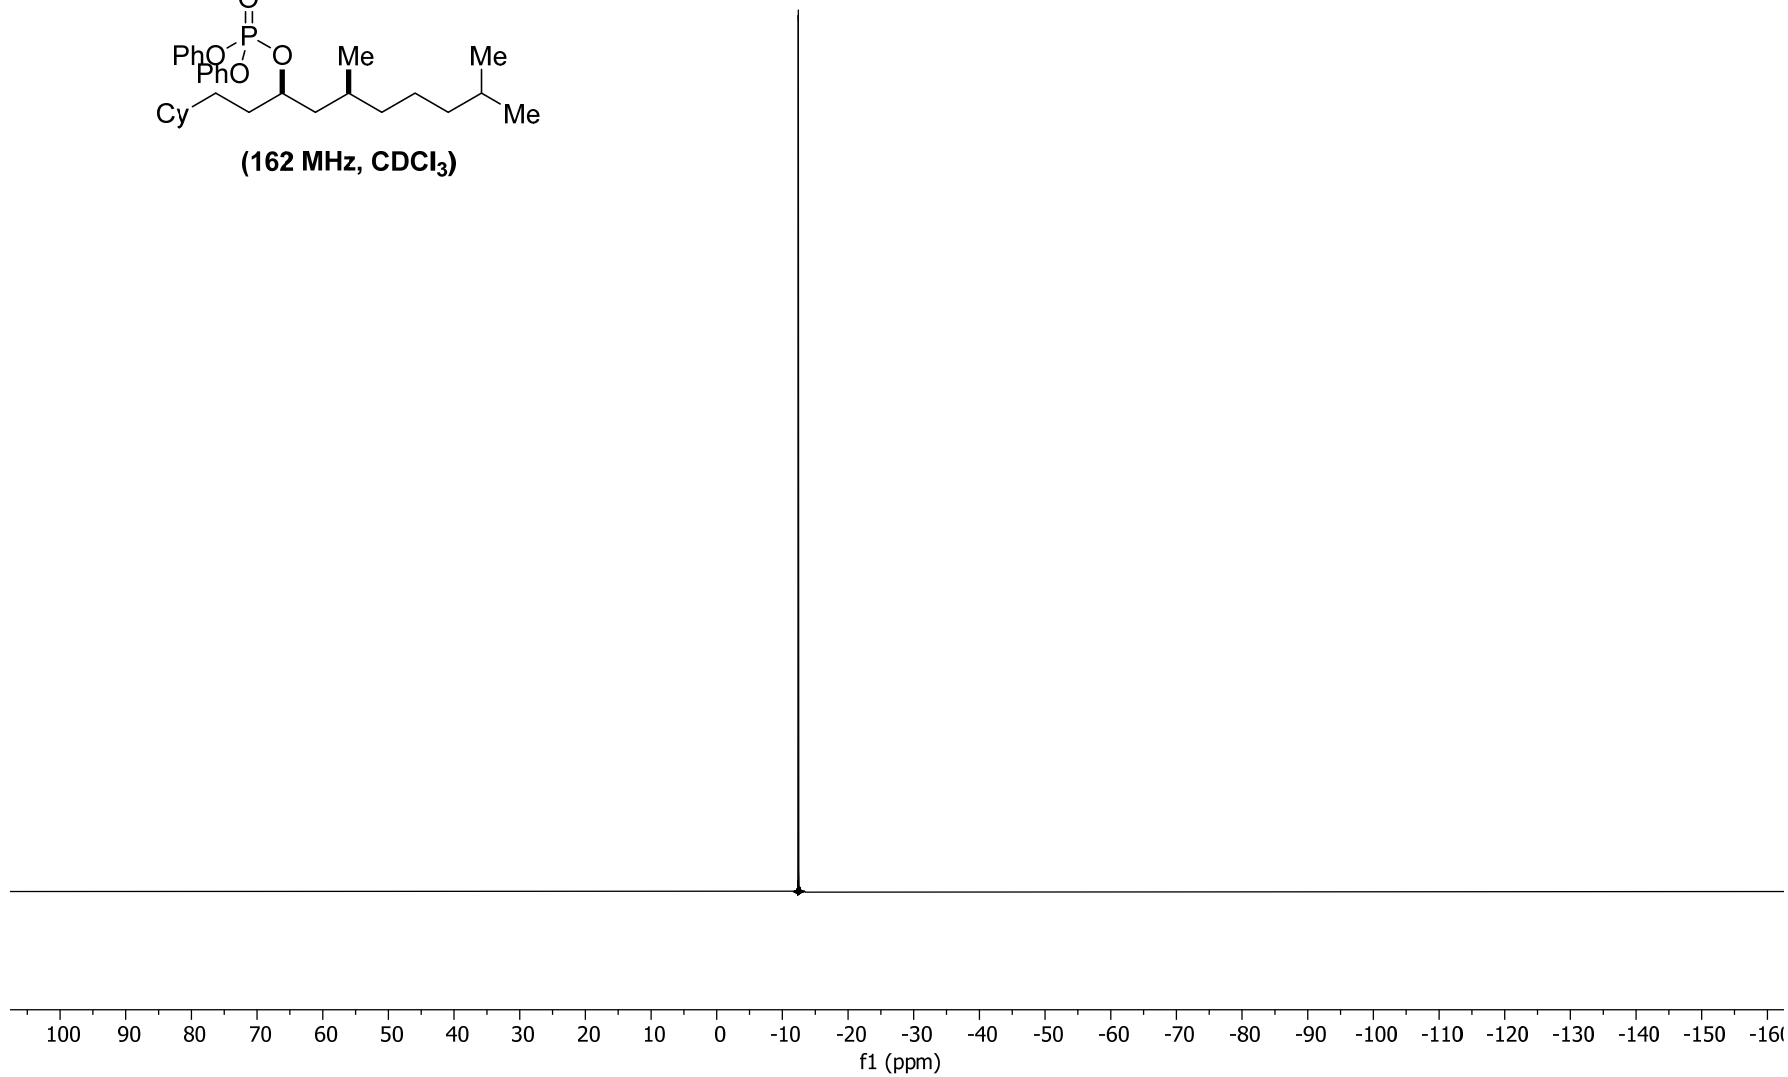

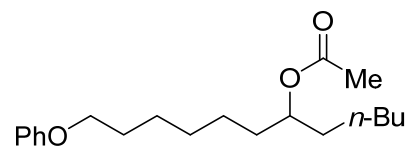

**Fig. 3, entry 15**  
**(400 MHz, CDCl<sub>3</sub>)**

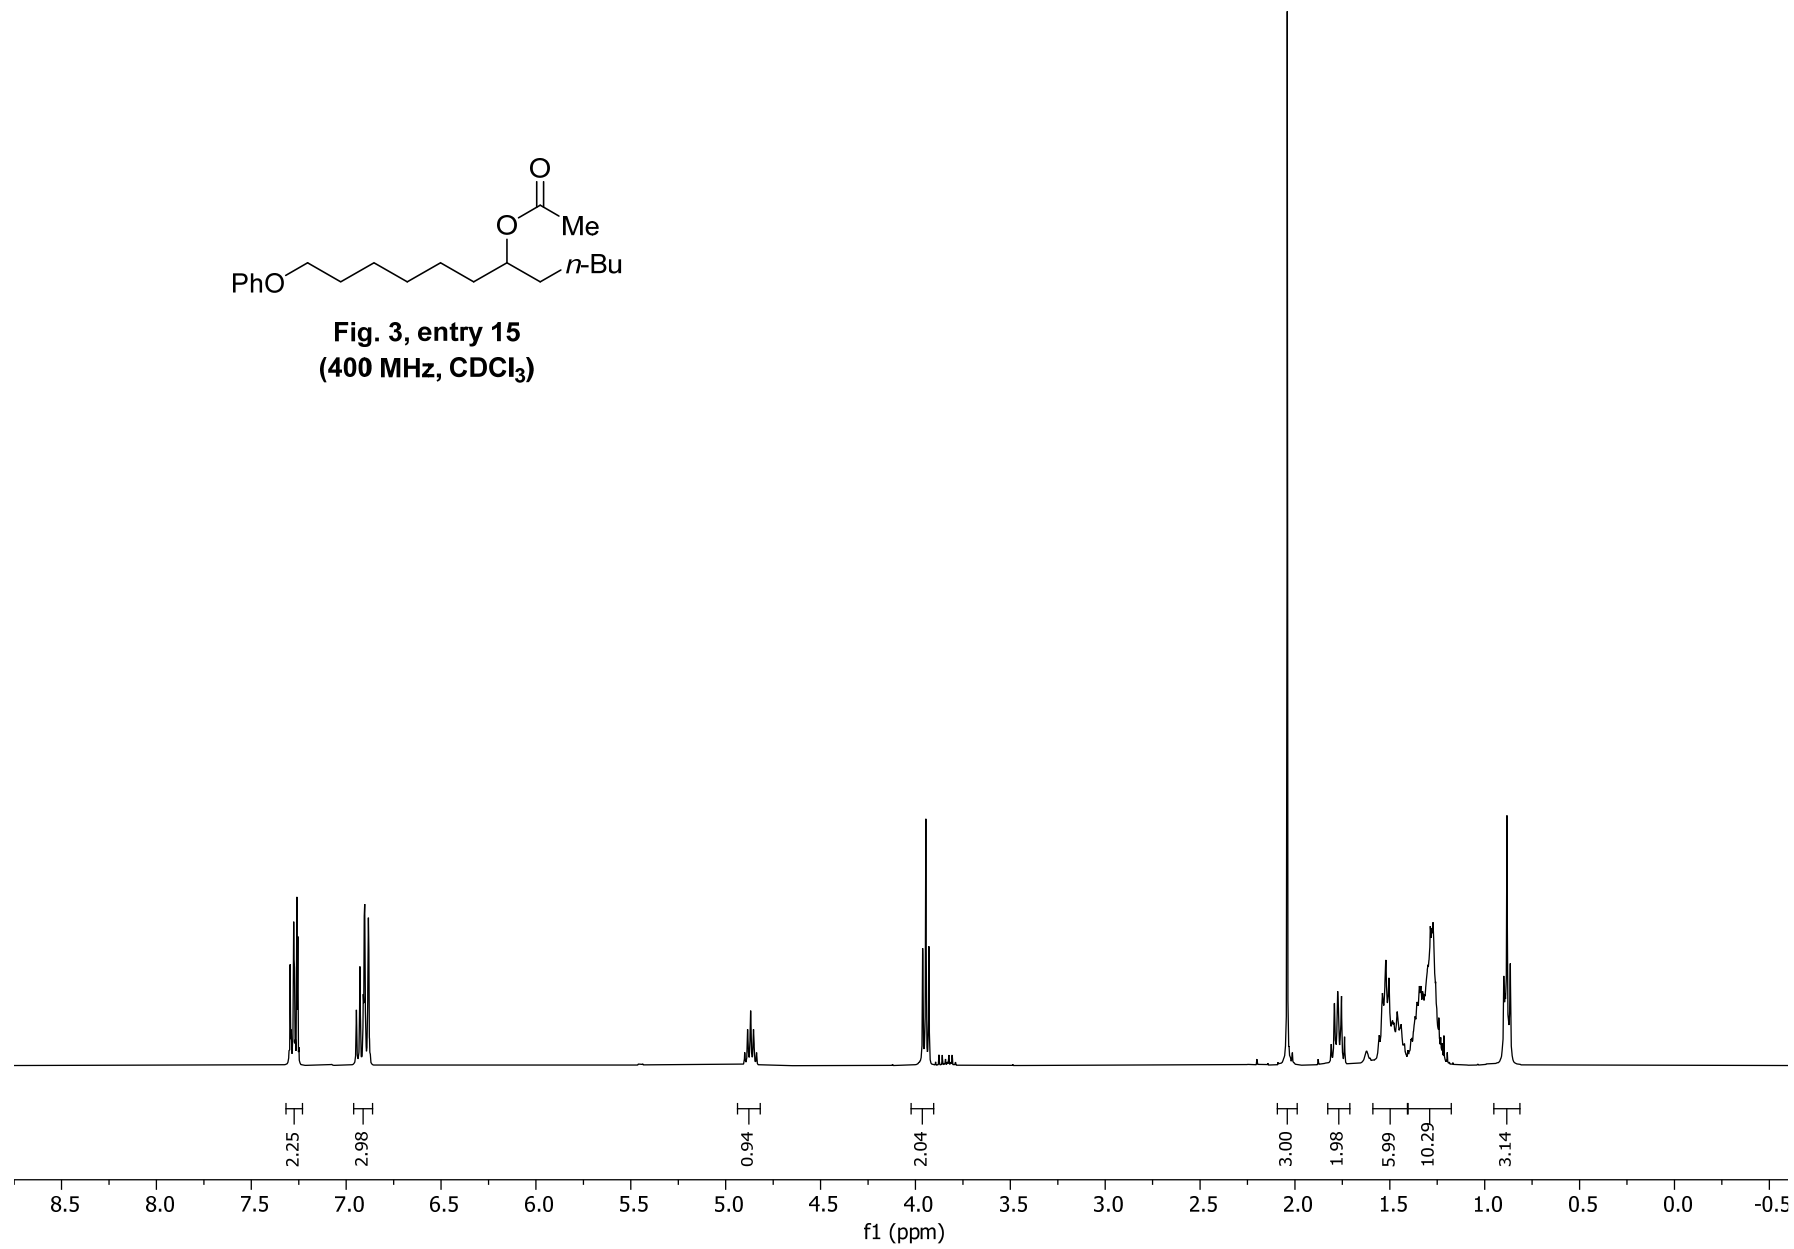

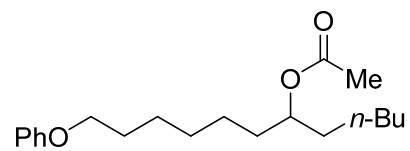

**Fig. 3, entry 15**  
**(101 MHz, CDCl<sub>3</sub>)**

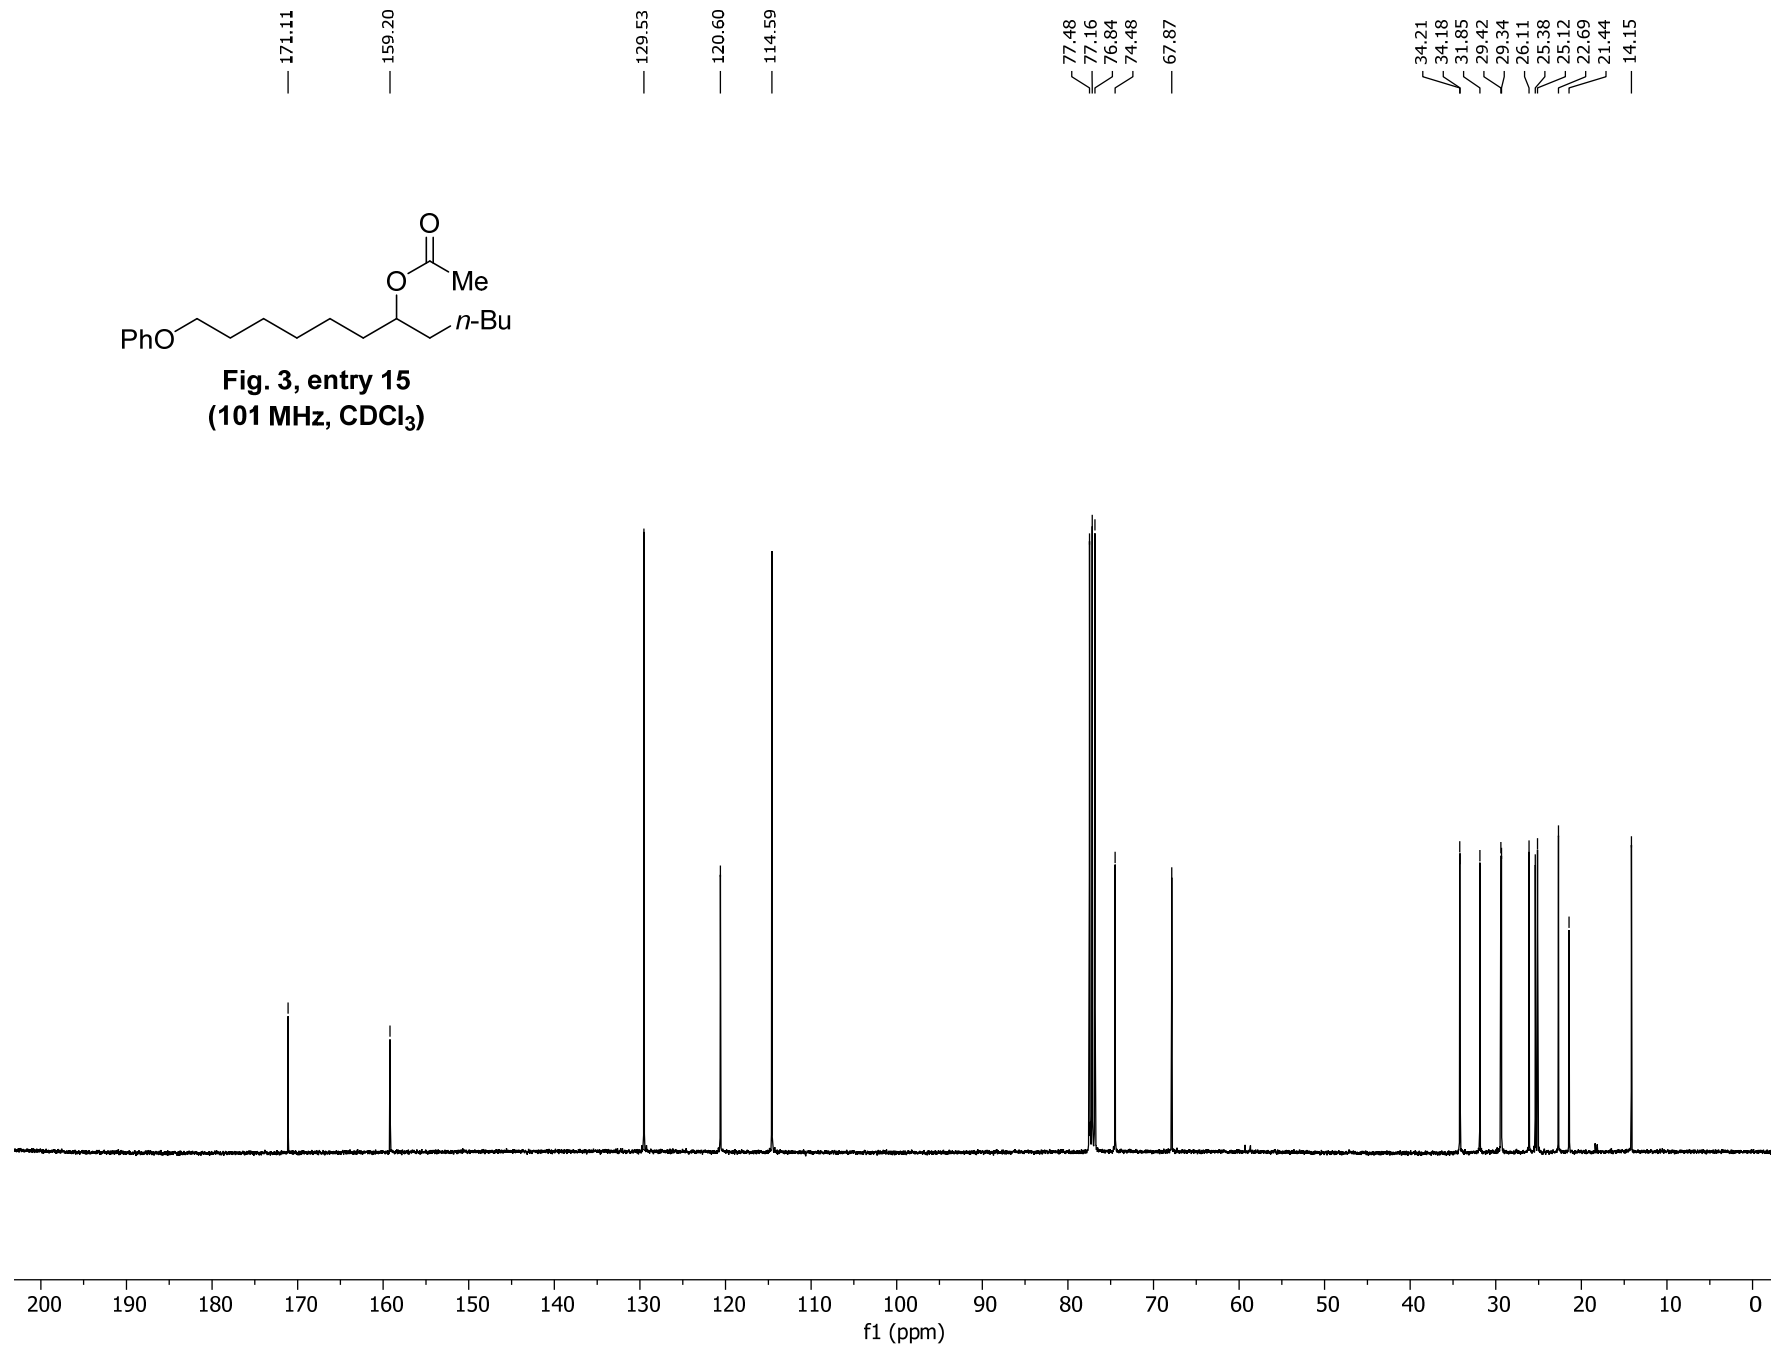

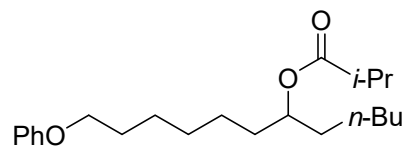

**Fig. 3, entry 16**  
**(400 MHz, CDCl<sub>3</sub>)**

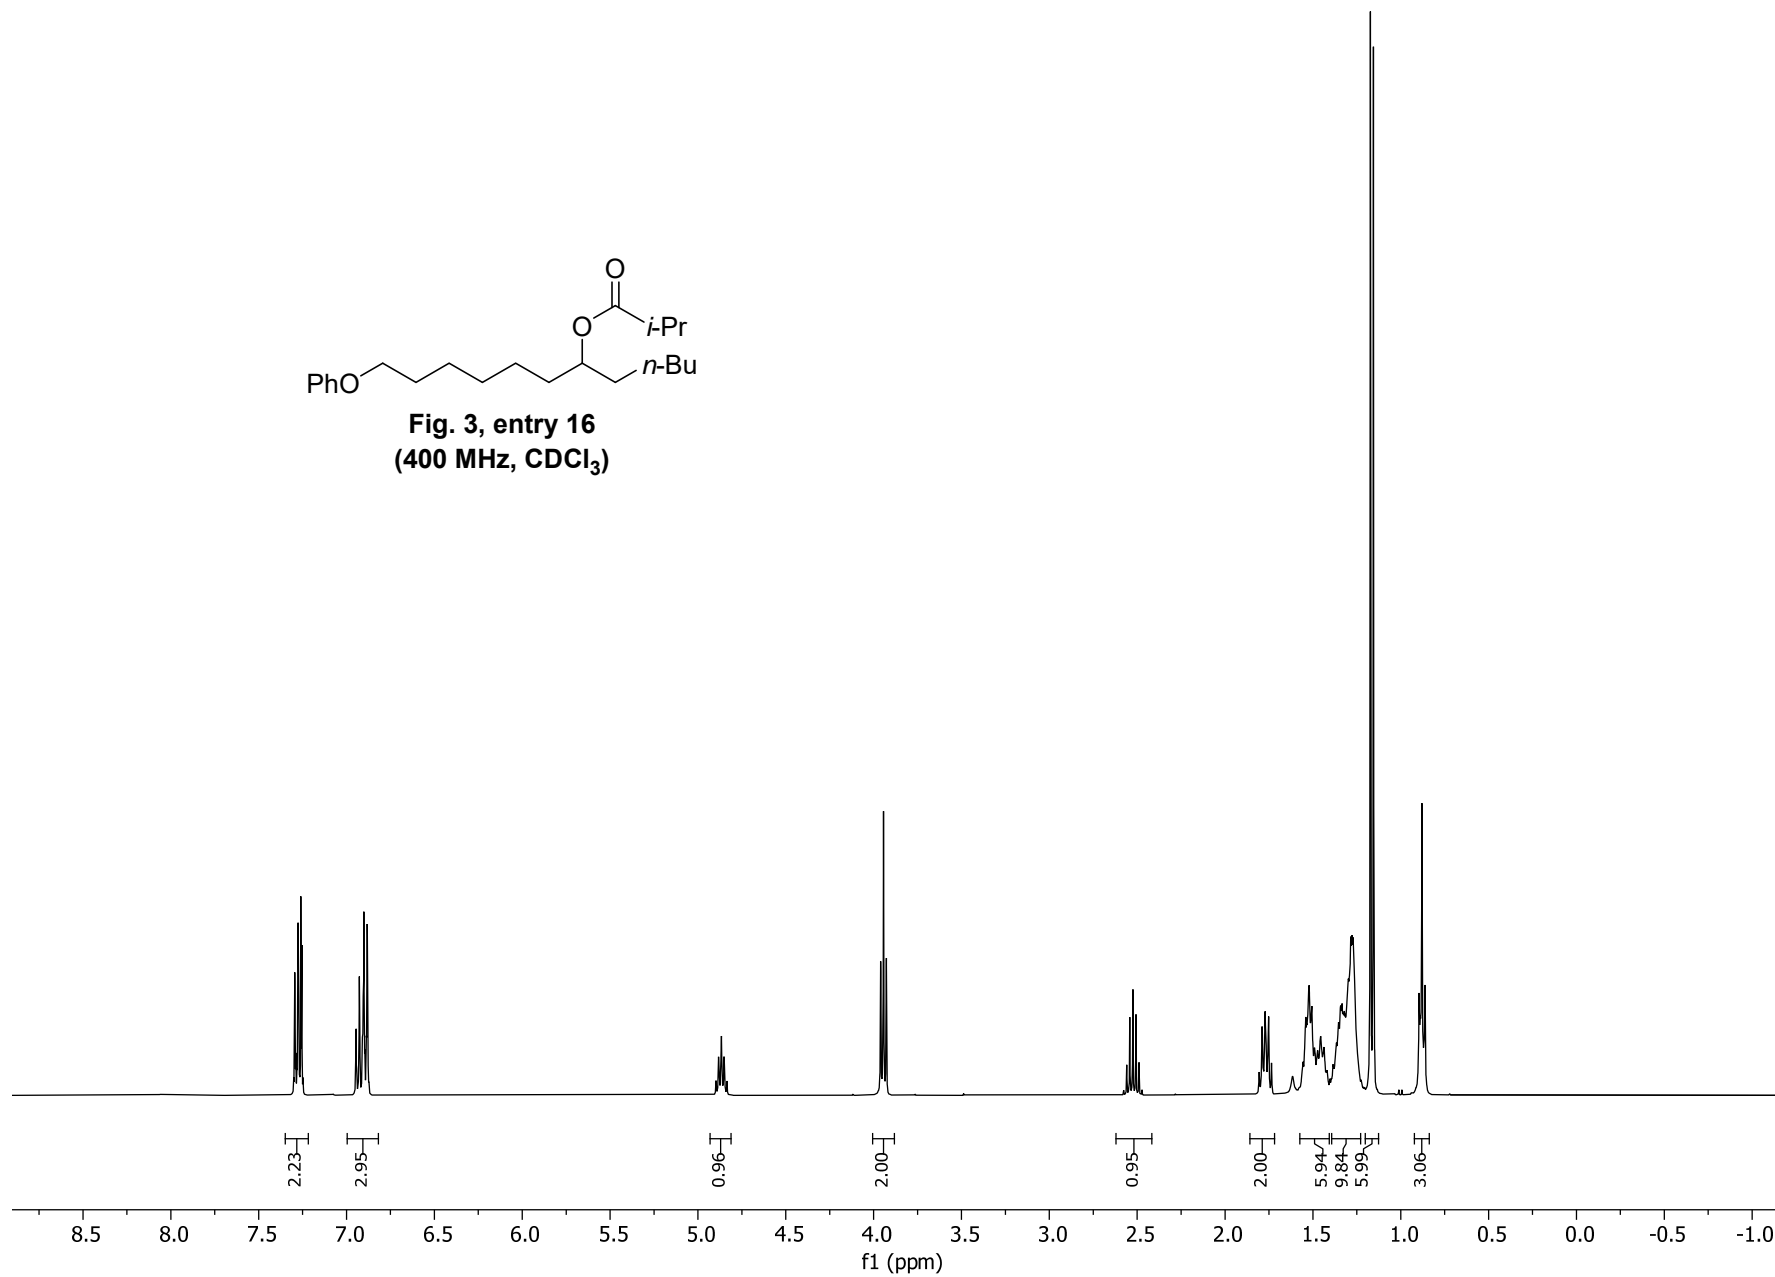

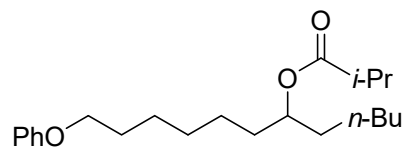

**Fig. 3, entry 16**  
**(101 MHz, CDCl<sub>3</sub>)**

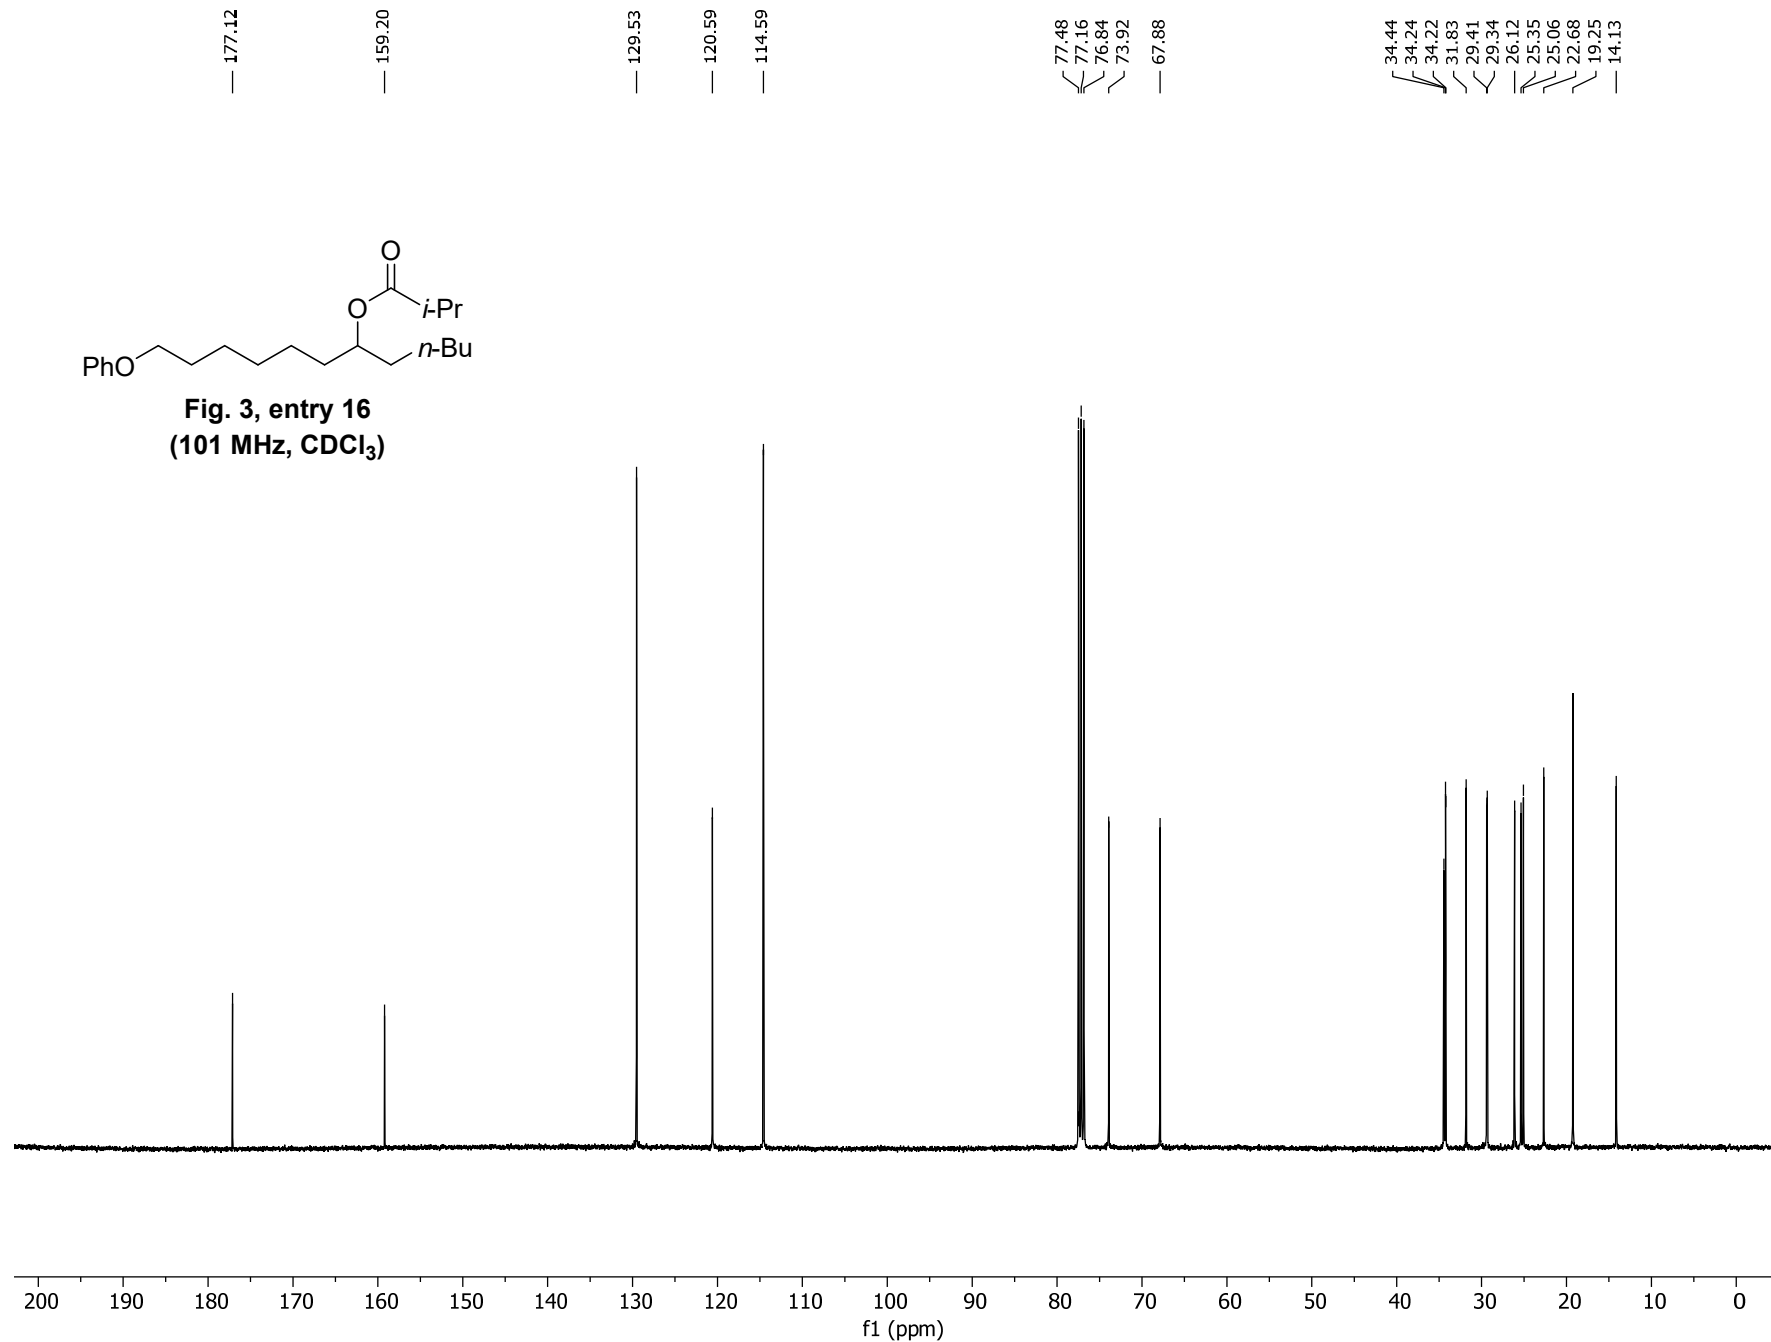

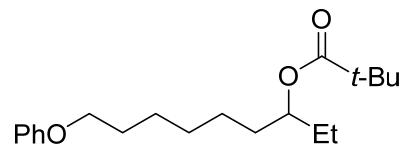

**Fig. 3, entry 17**  
**(400 MHz, CDCl<sub>3</sub>)**

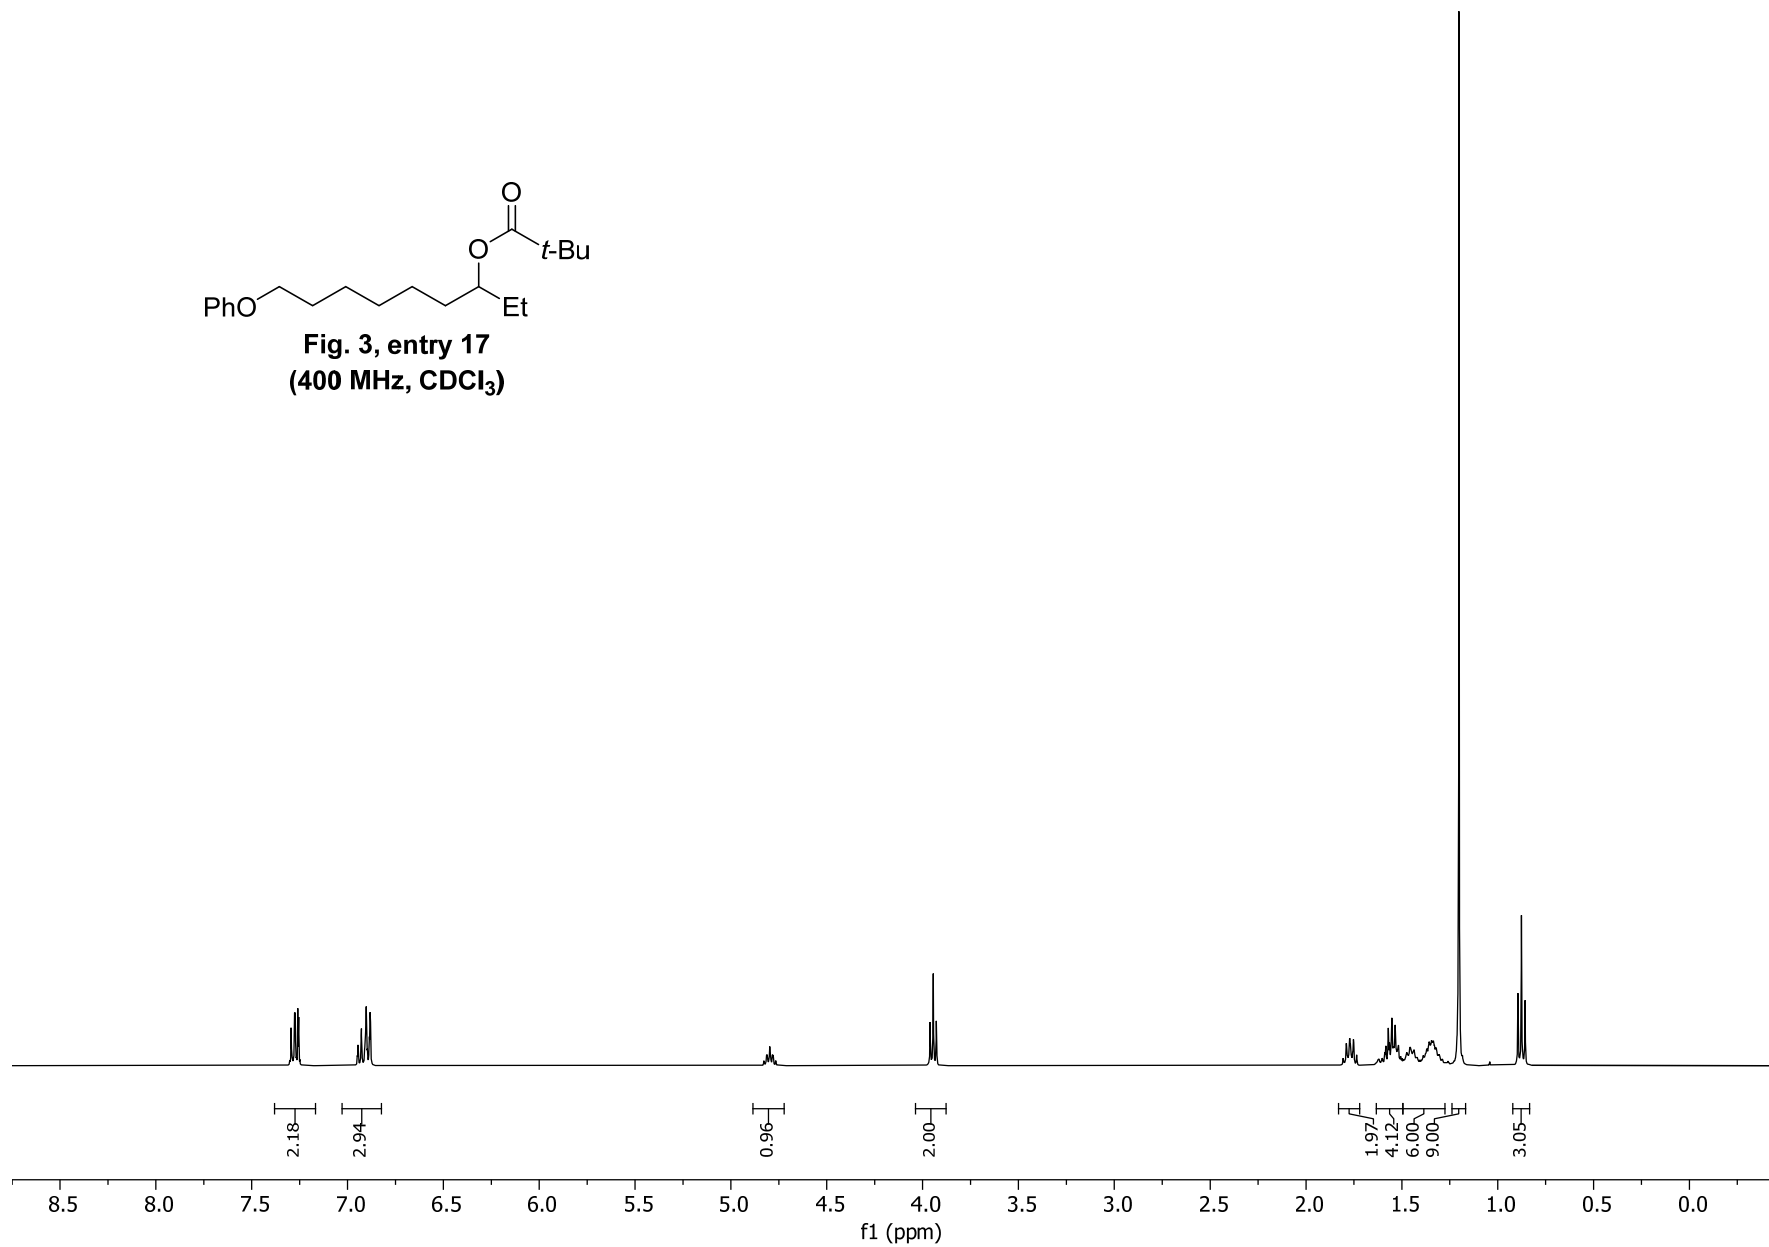

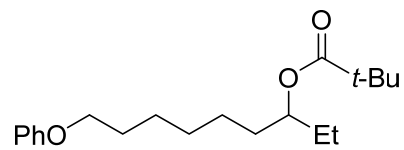

**Fig. 3, entry 17**  
**(101 MHz, CDCl<sub>3</sub>)**

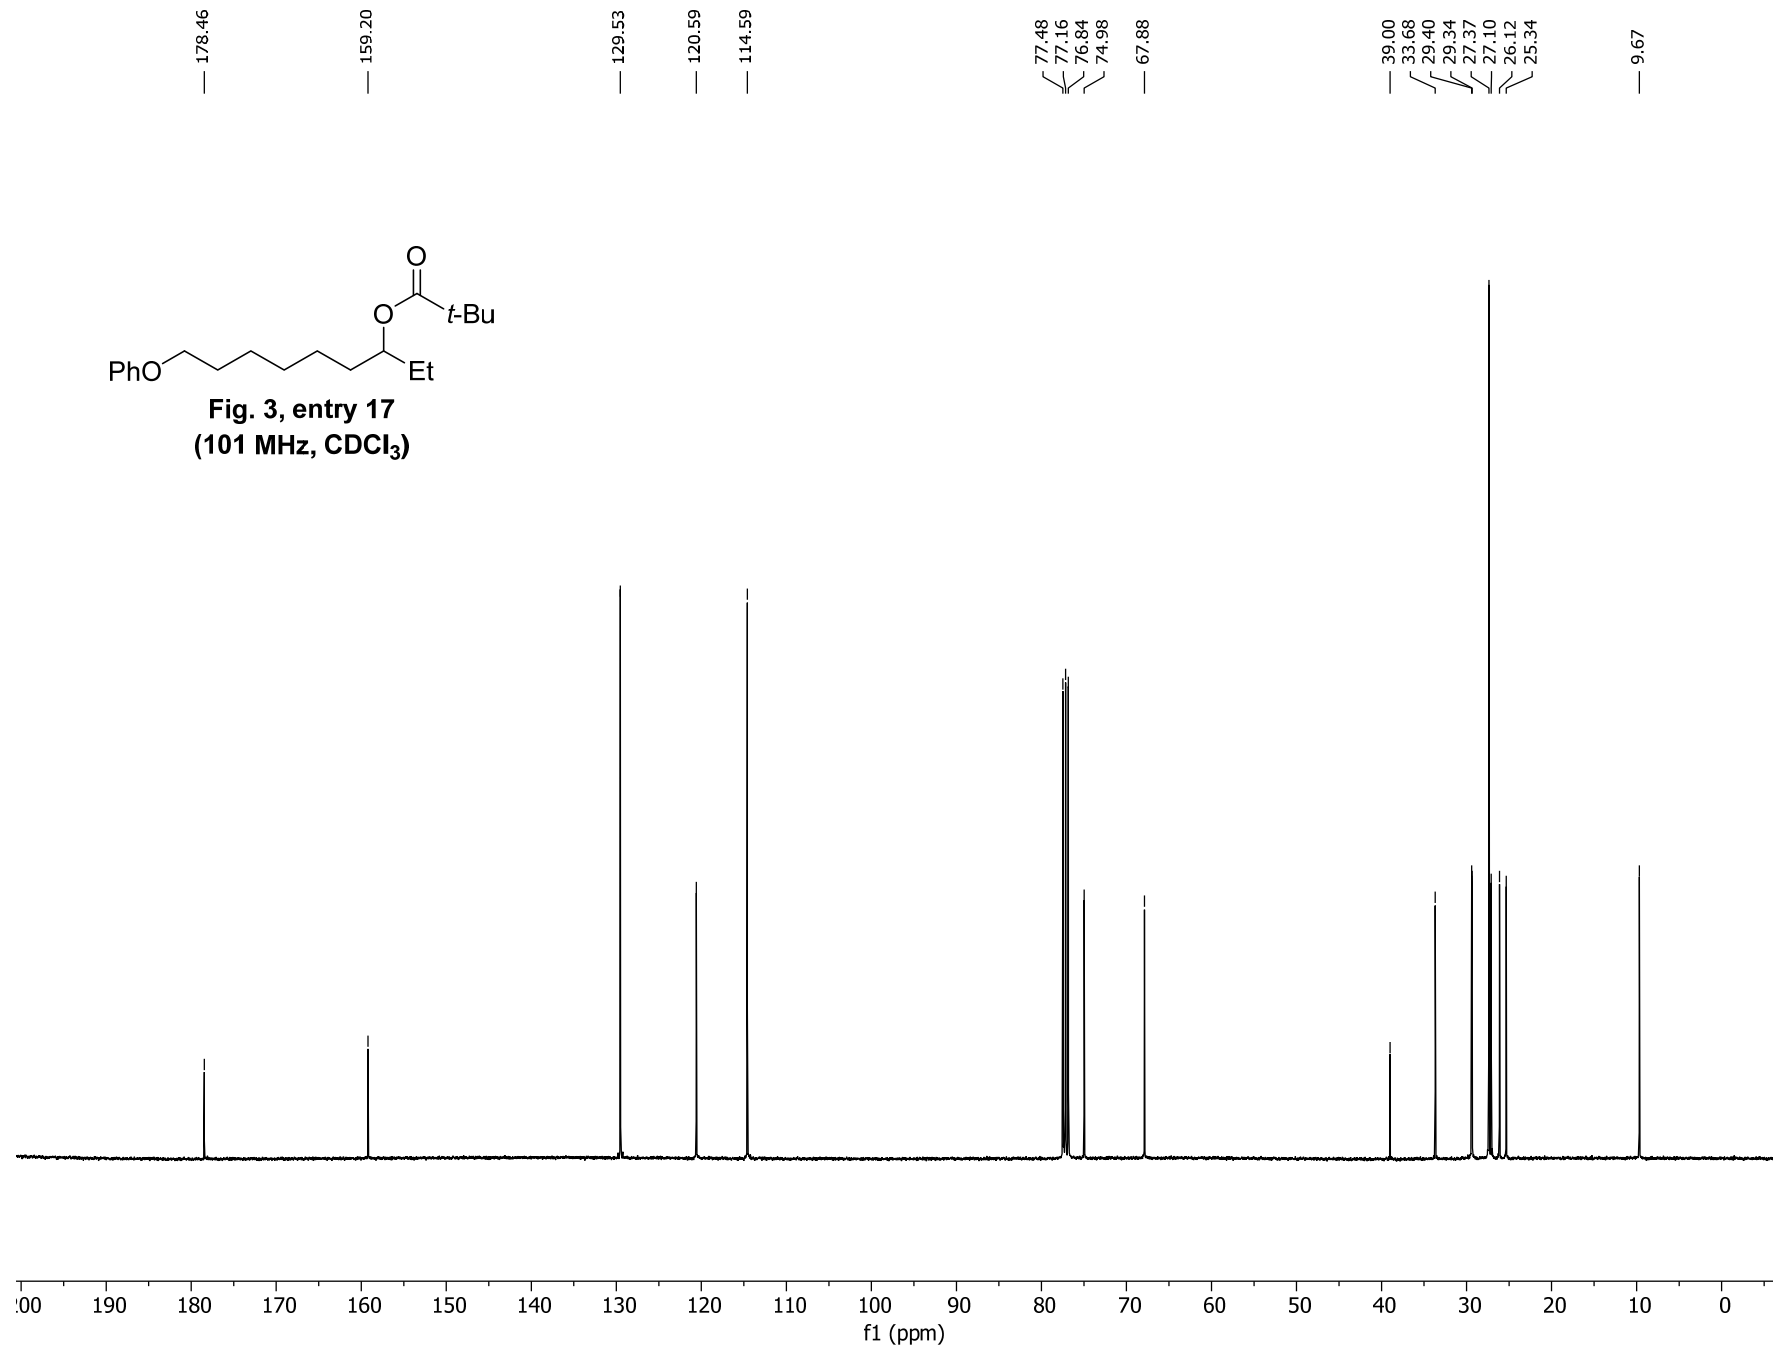



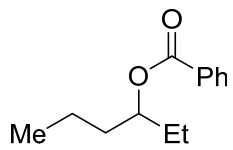

**Fig. 3, entry 18**  
**(400 MHz, CDCl<sub>3</sub>)**

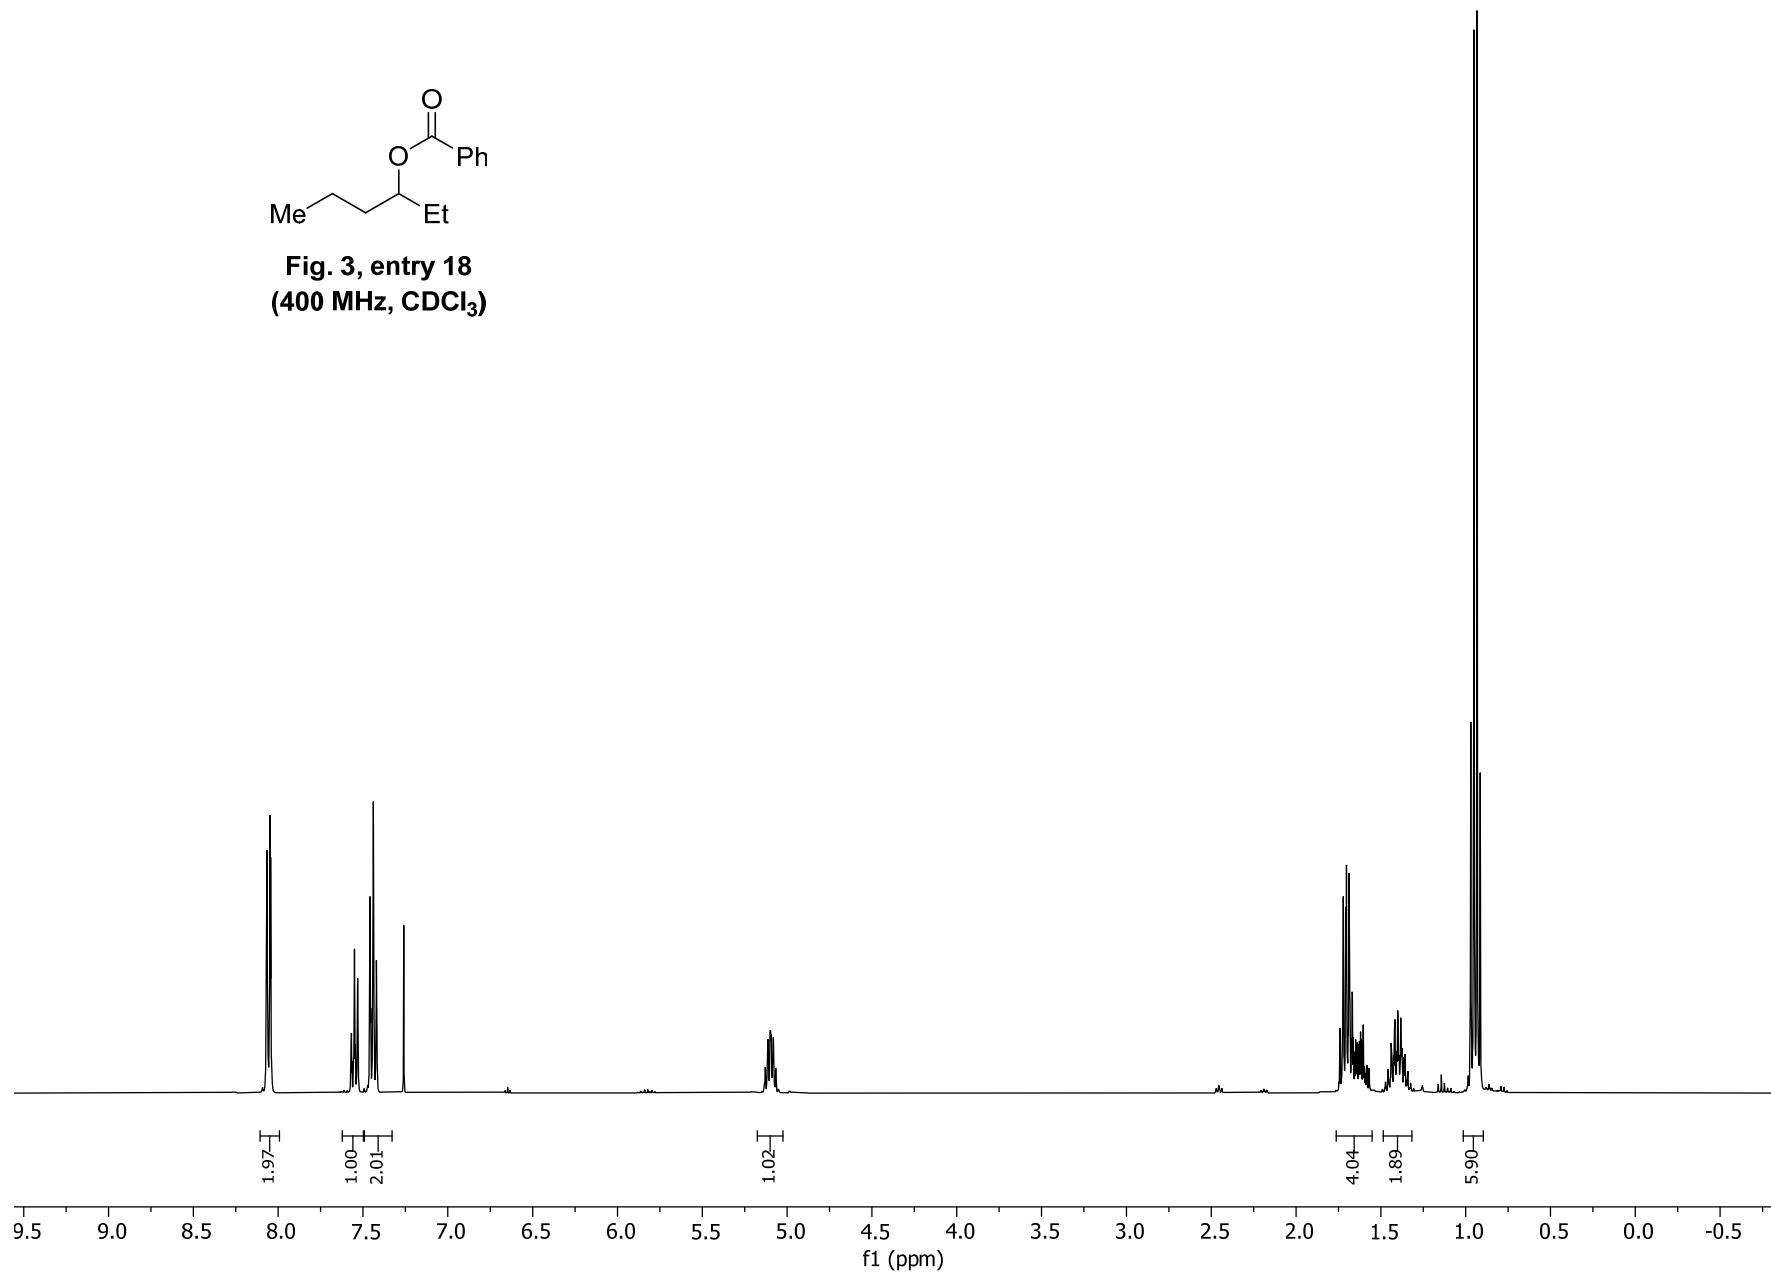

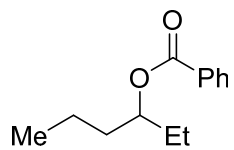

**Fig. 3, entry 18**  
(101 MHz, CDCl<sub>3</sub>)

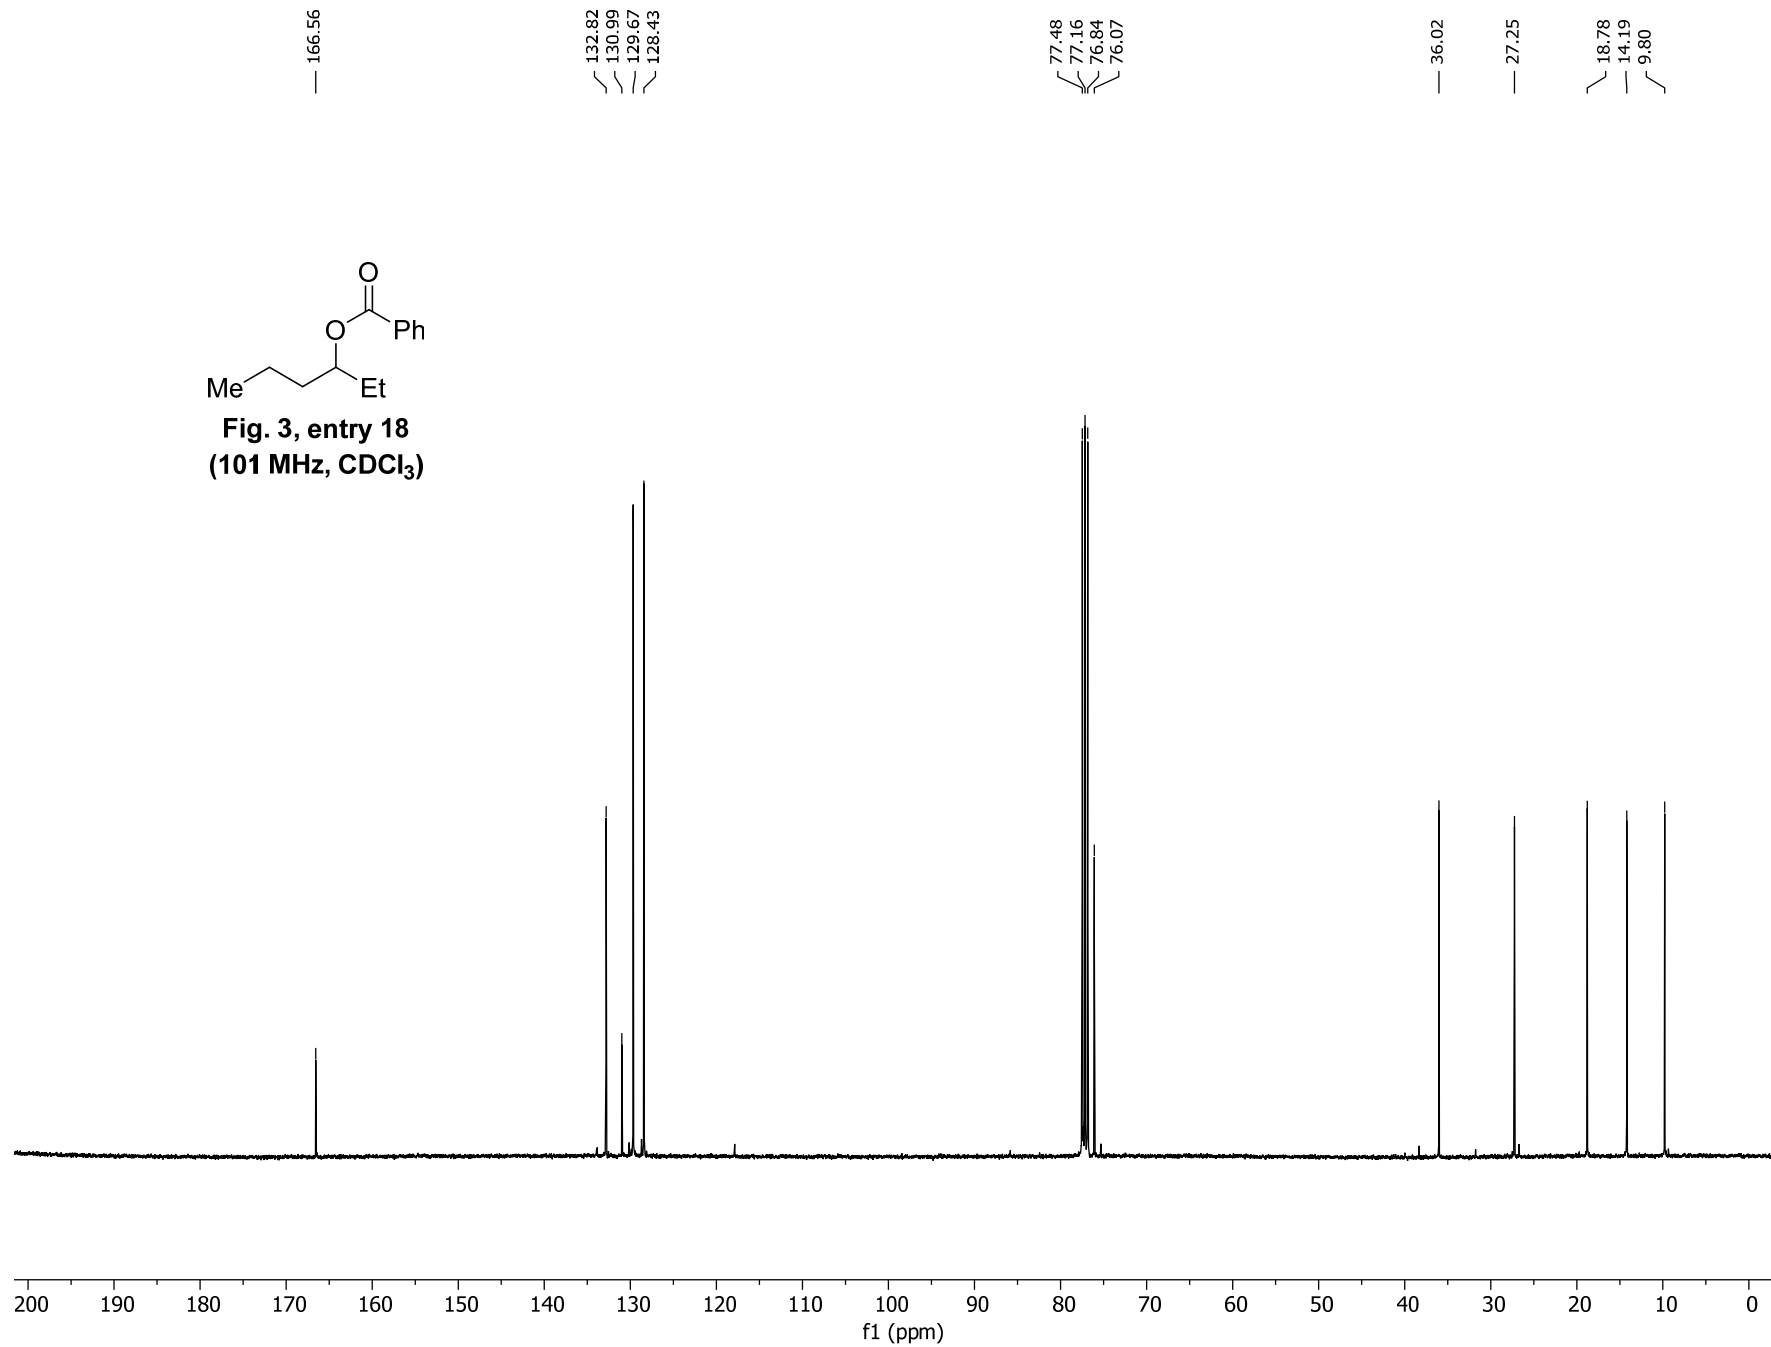

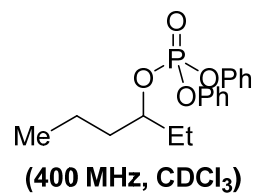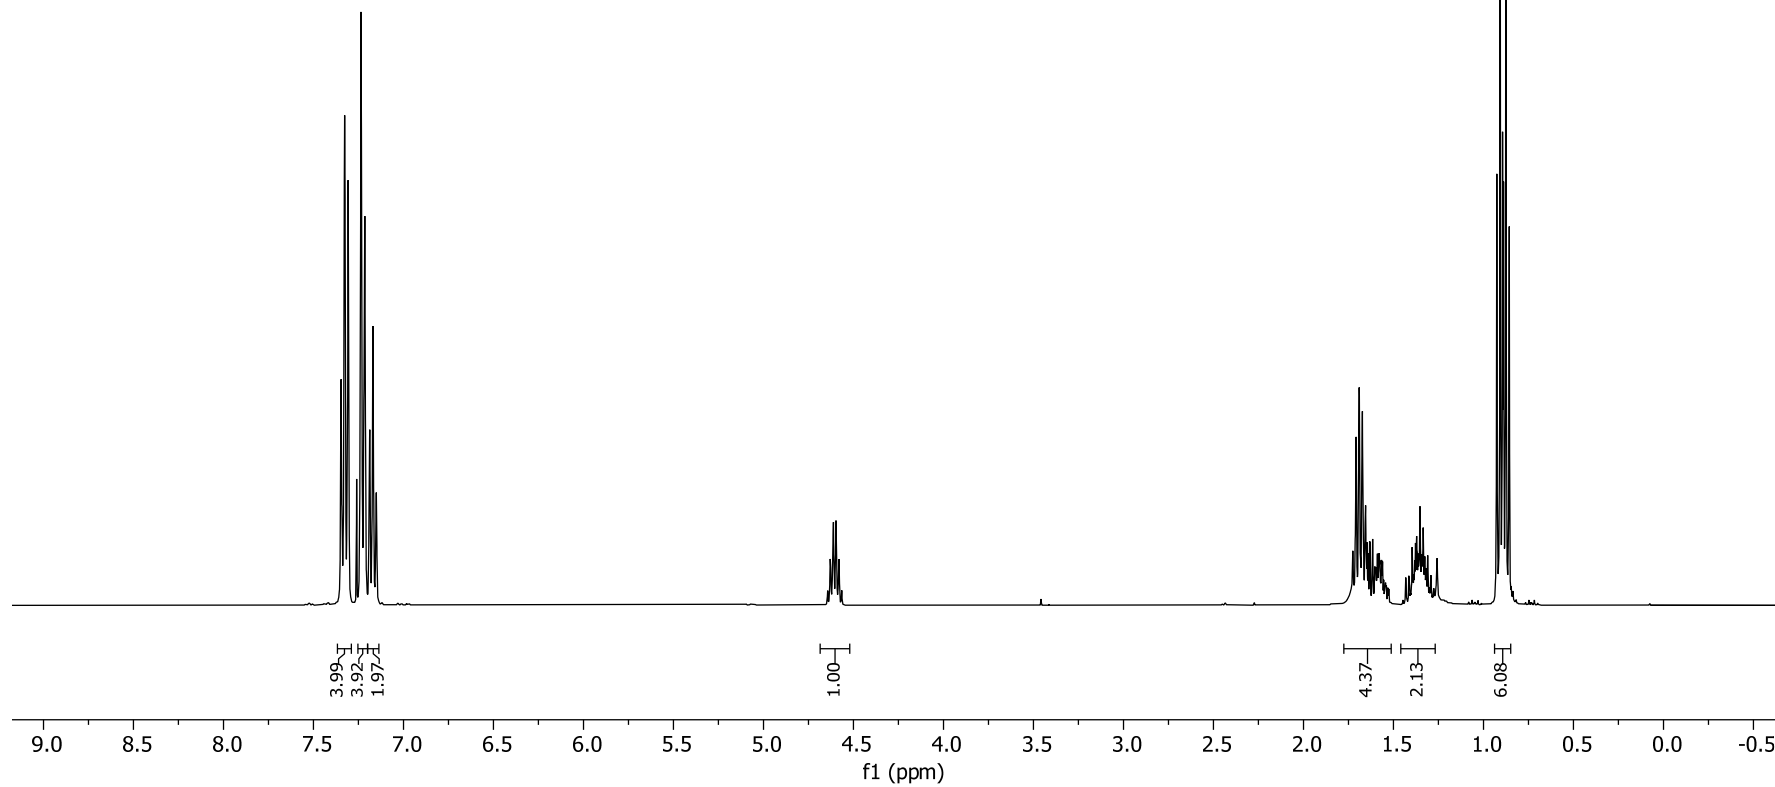

S-107

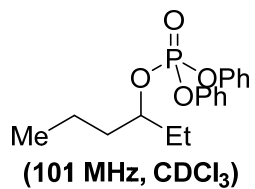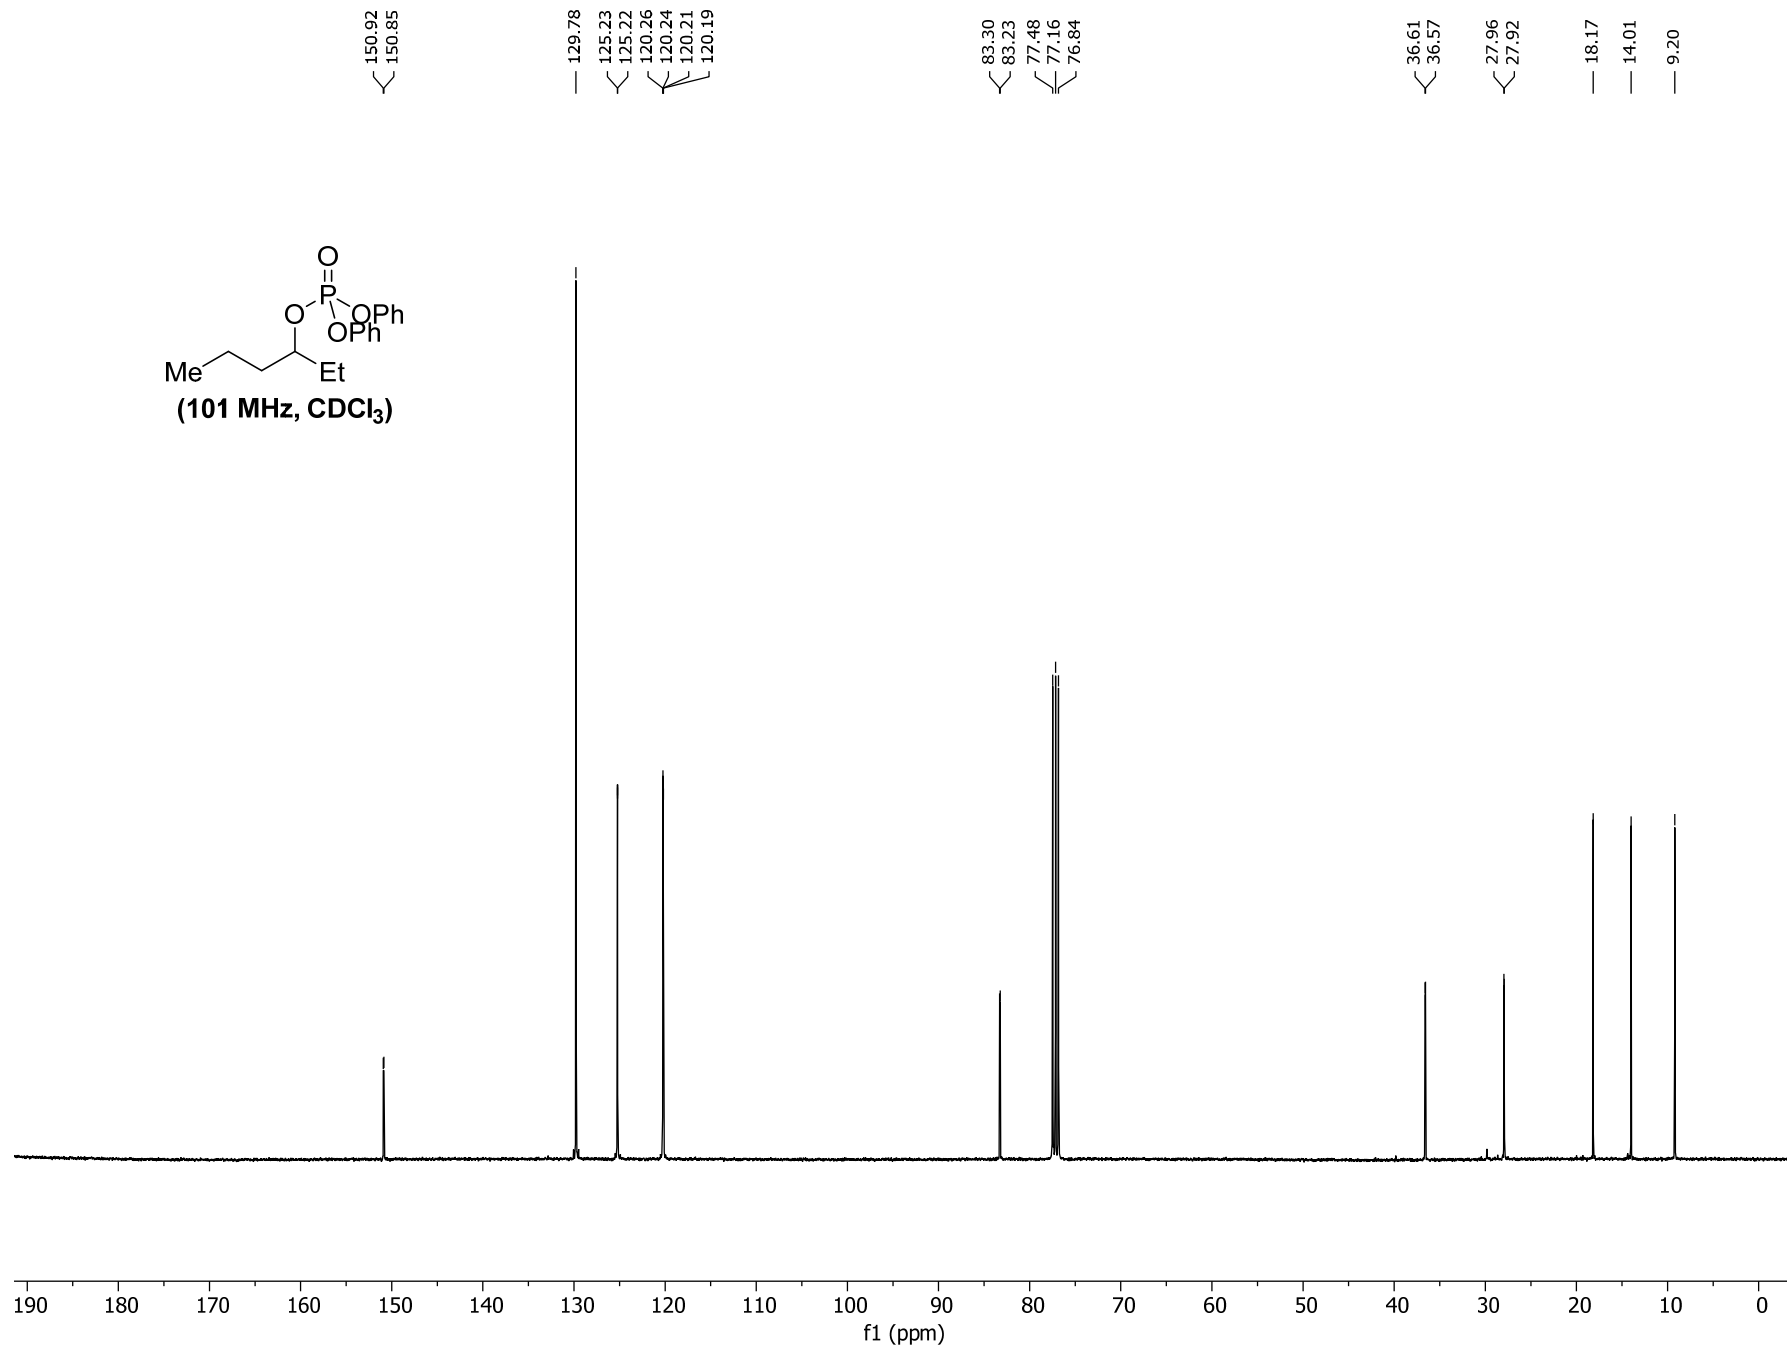

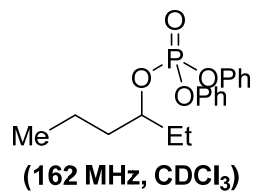

-12.32

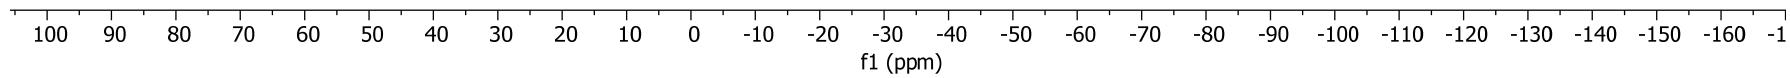

S-109

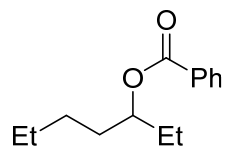

Fig. 3, entry 19  
(400 MHz, CDCl<sub>3</sub>)

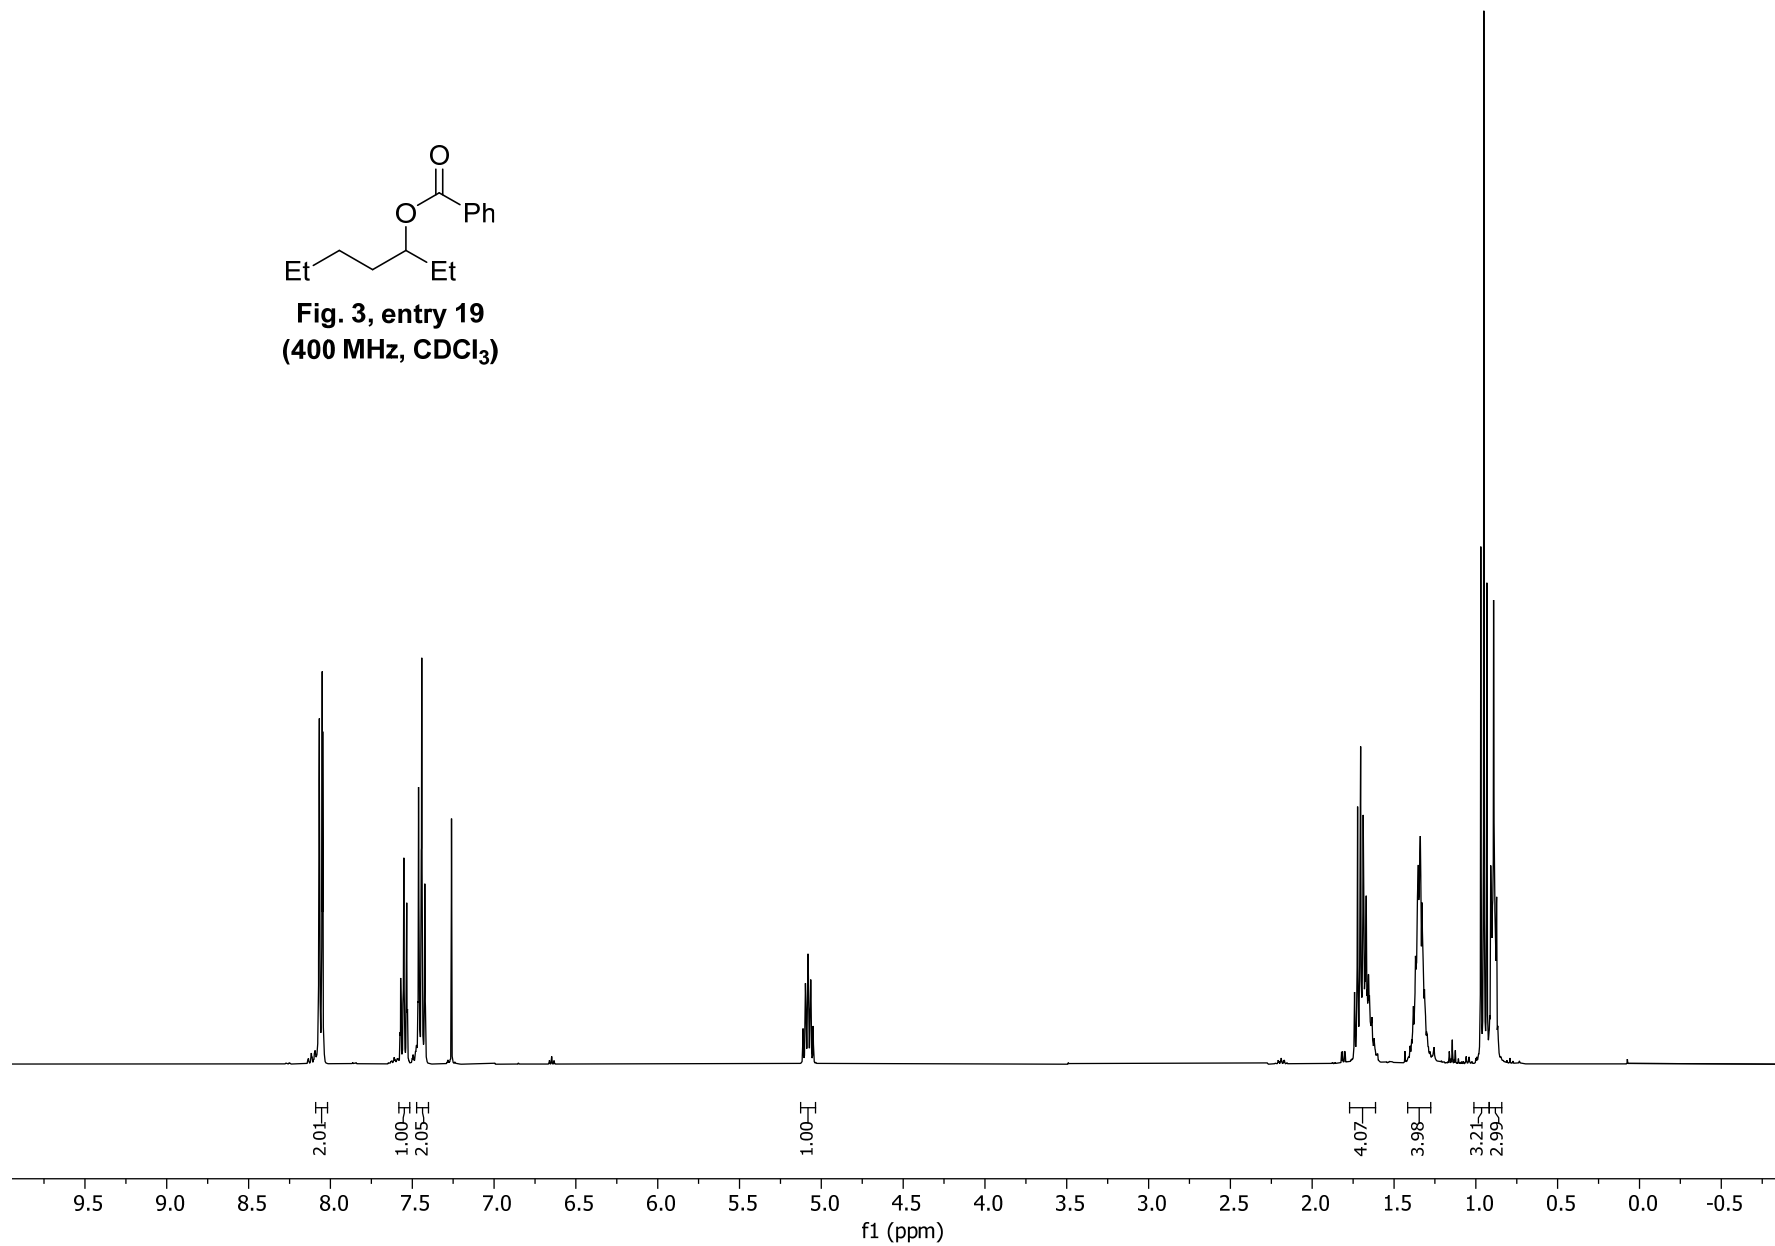

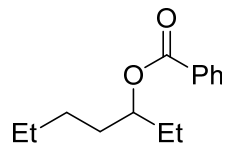

Fig. 3, entry 19  
(101 MHz, CDCl<sub>3</sub>)

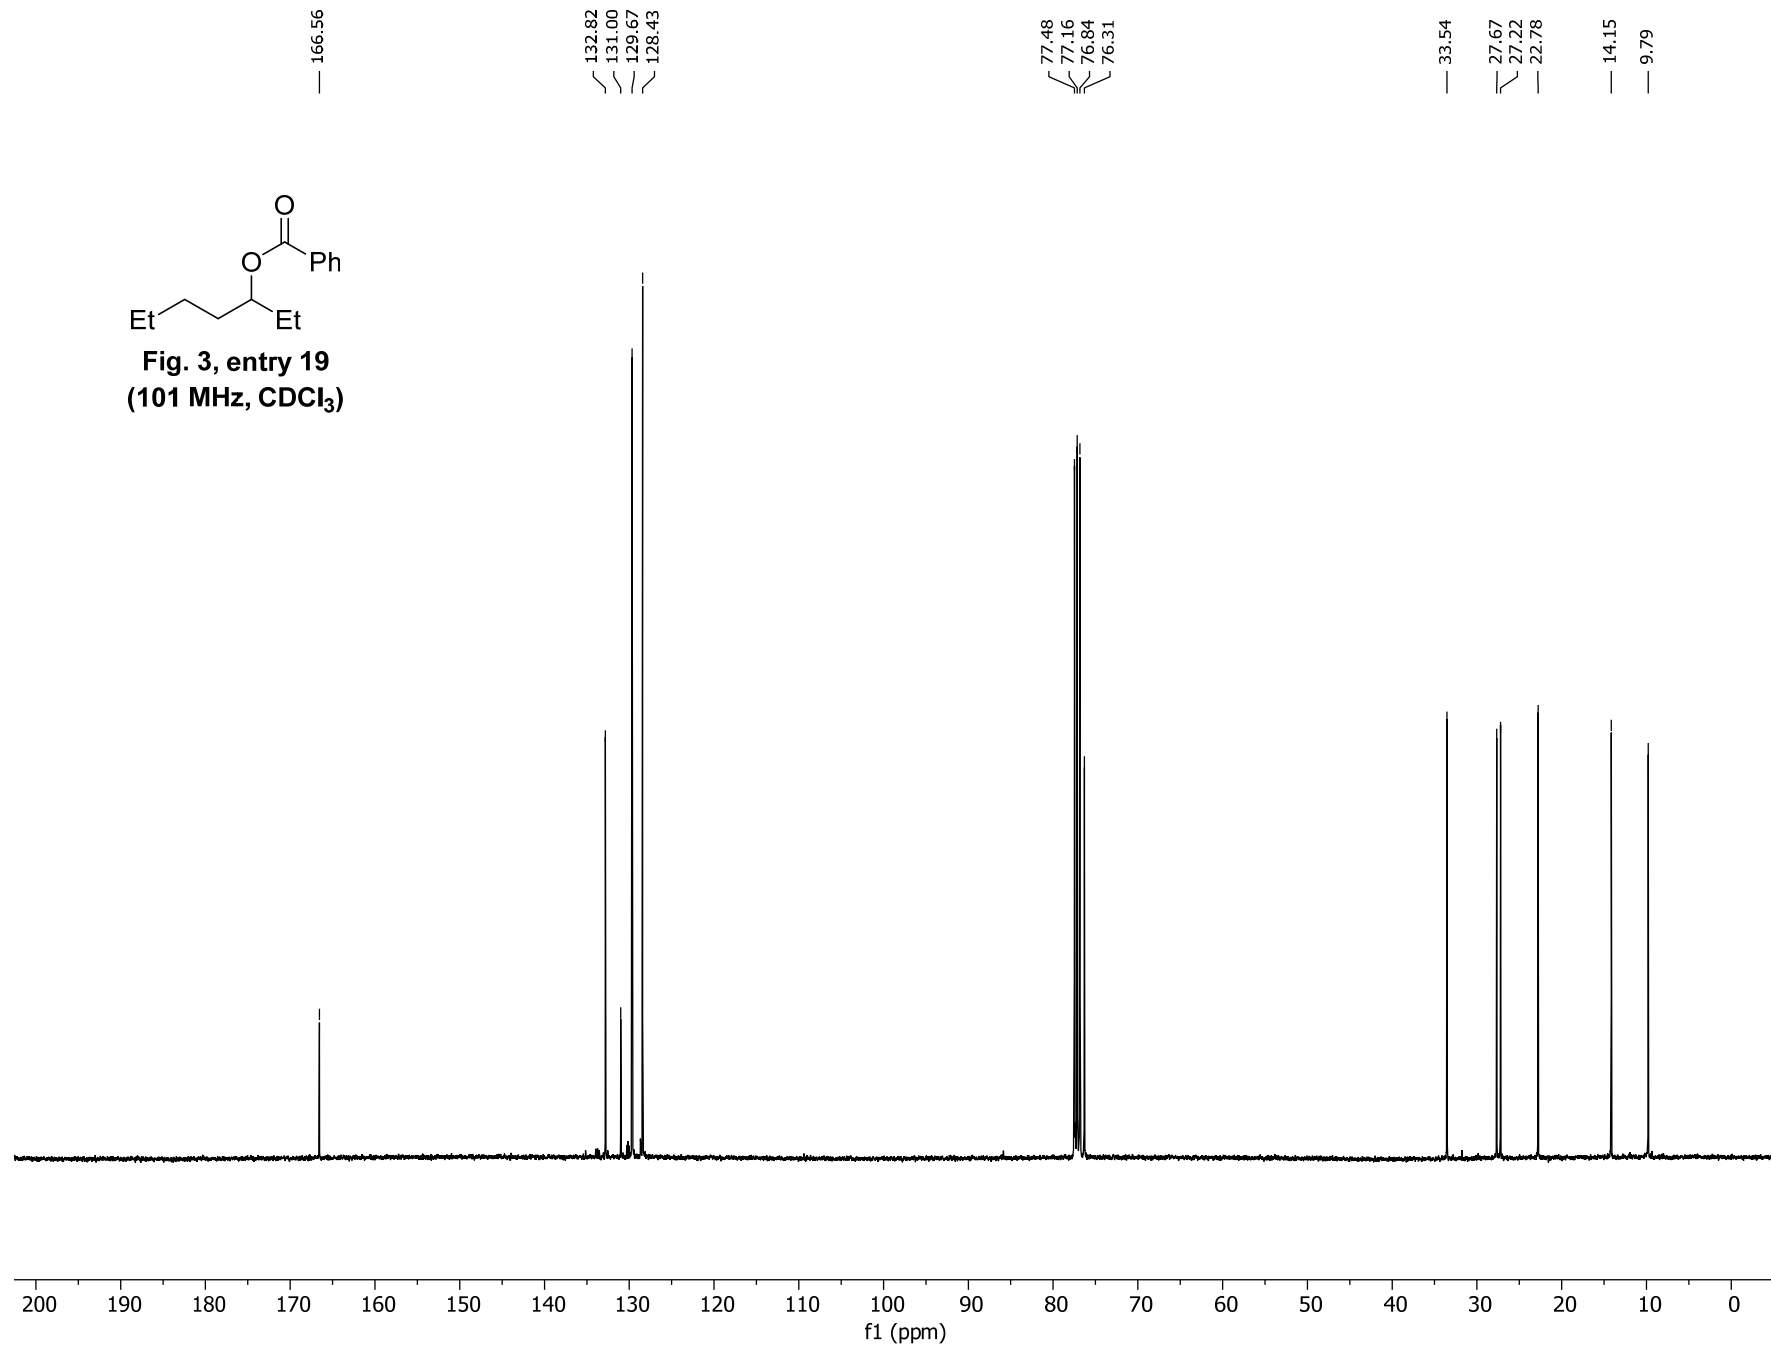

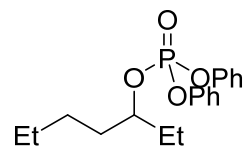

(400 MHz, CDCl<sub>3</sub>)

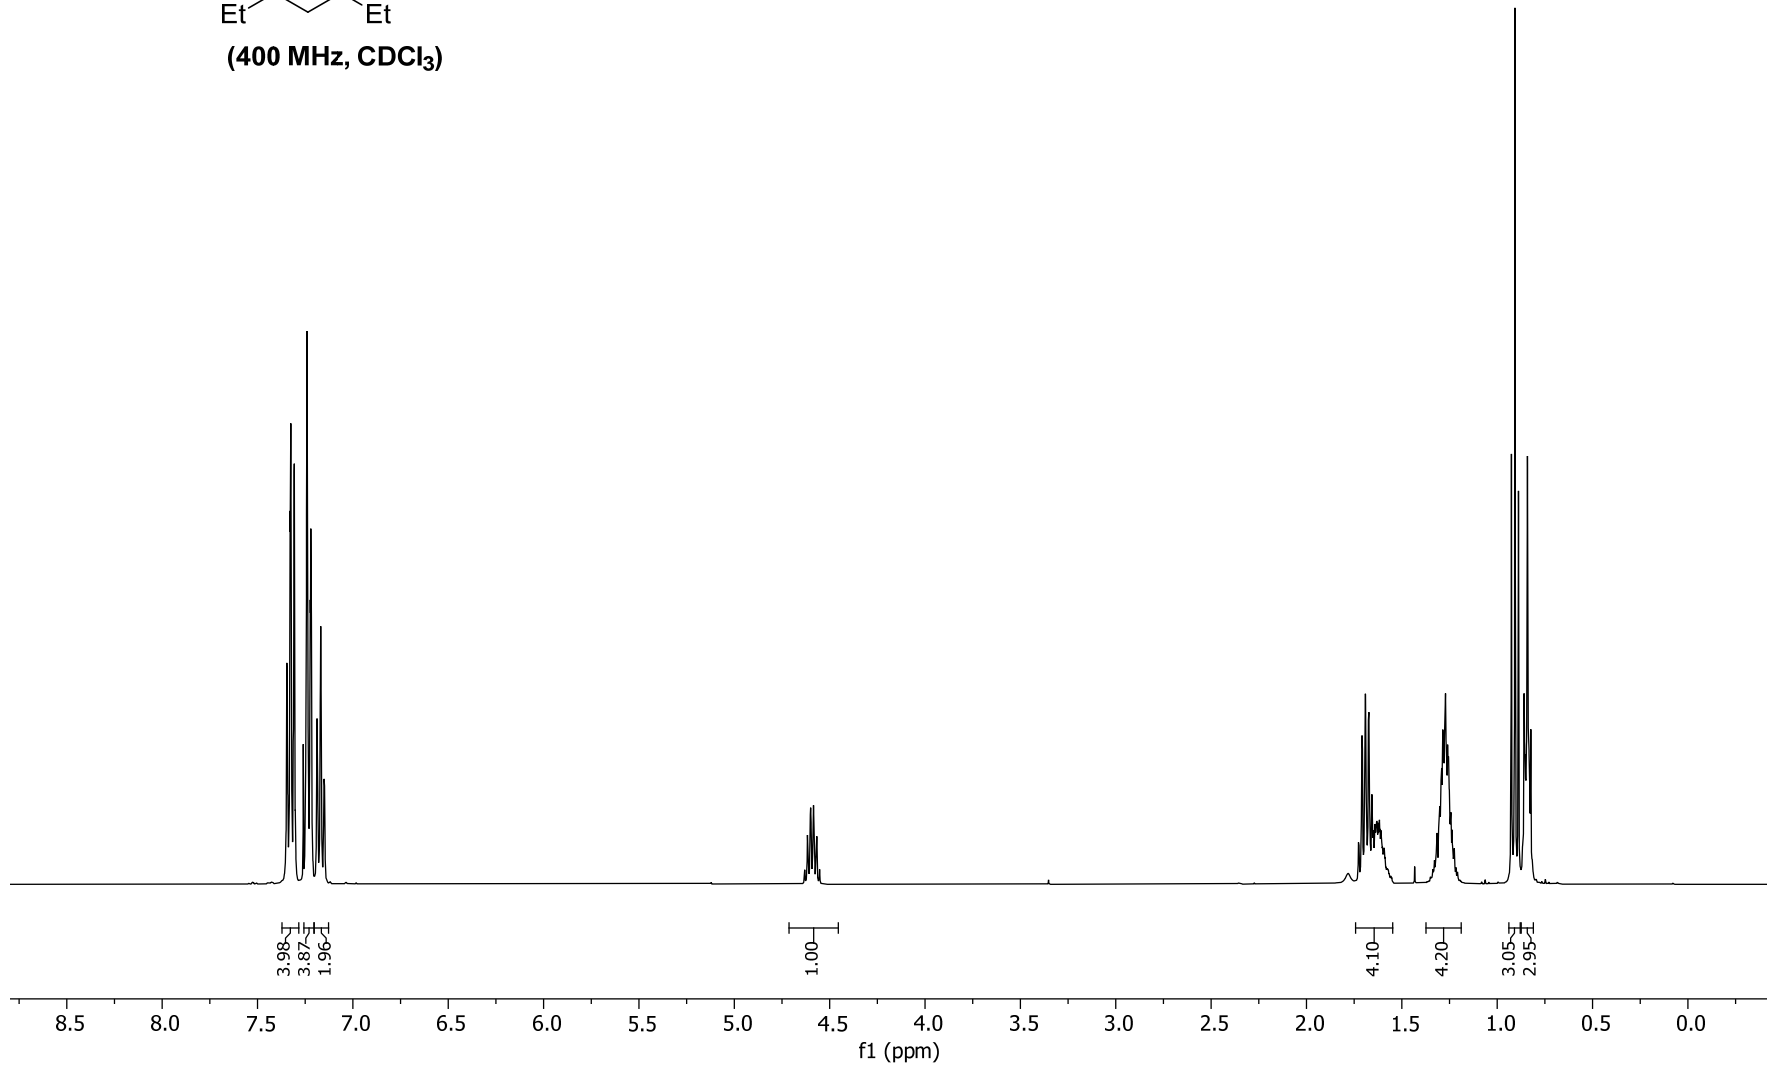

S-112



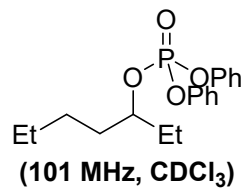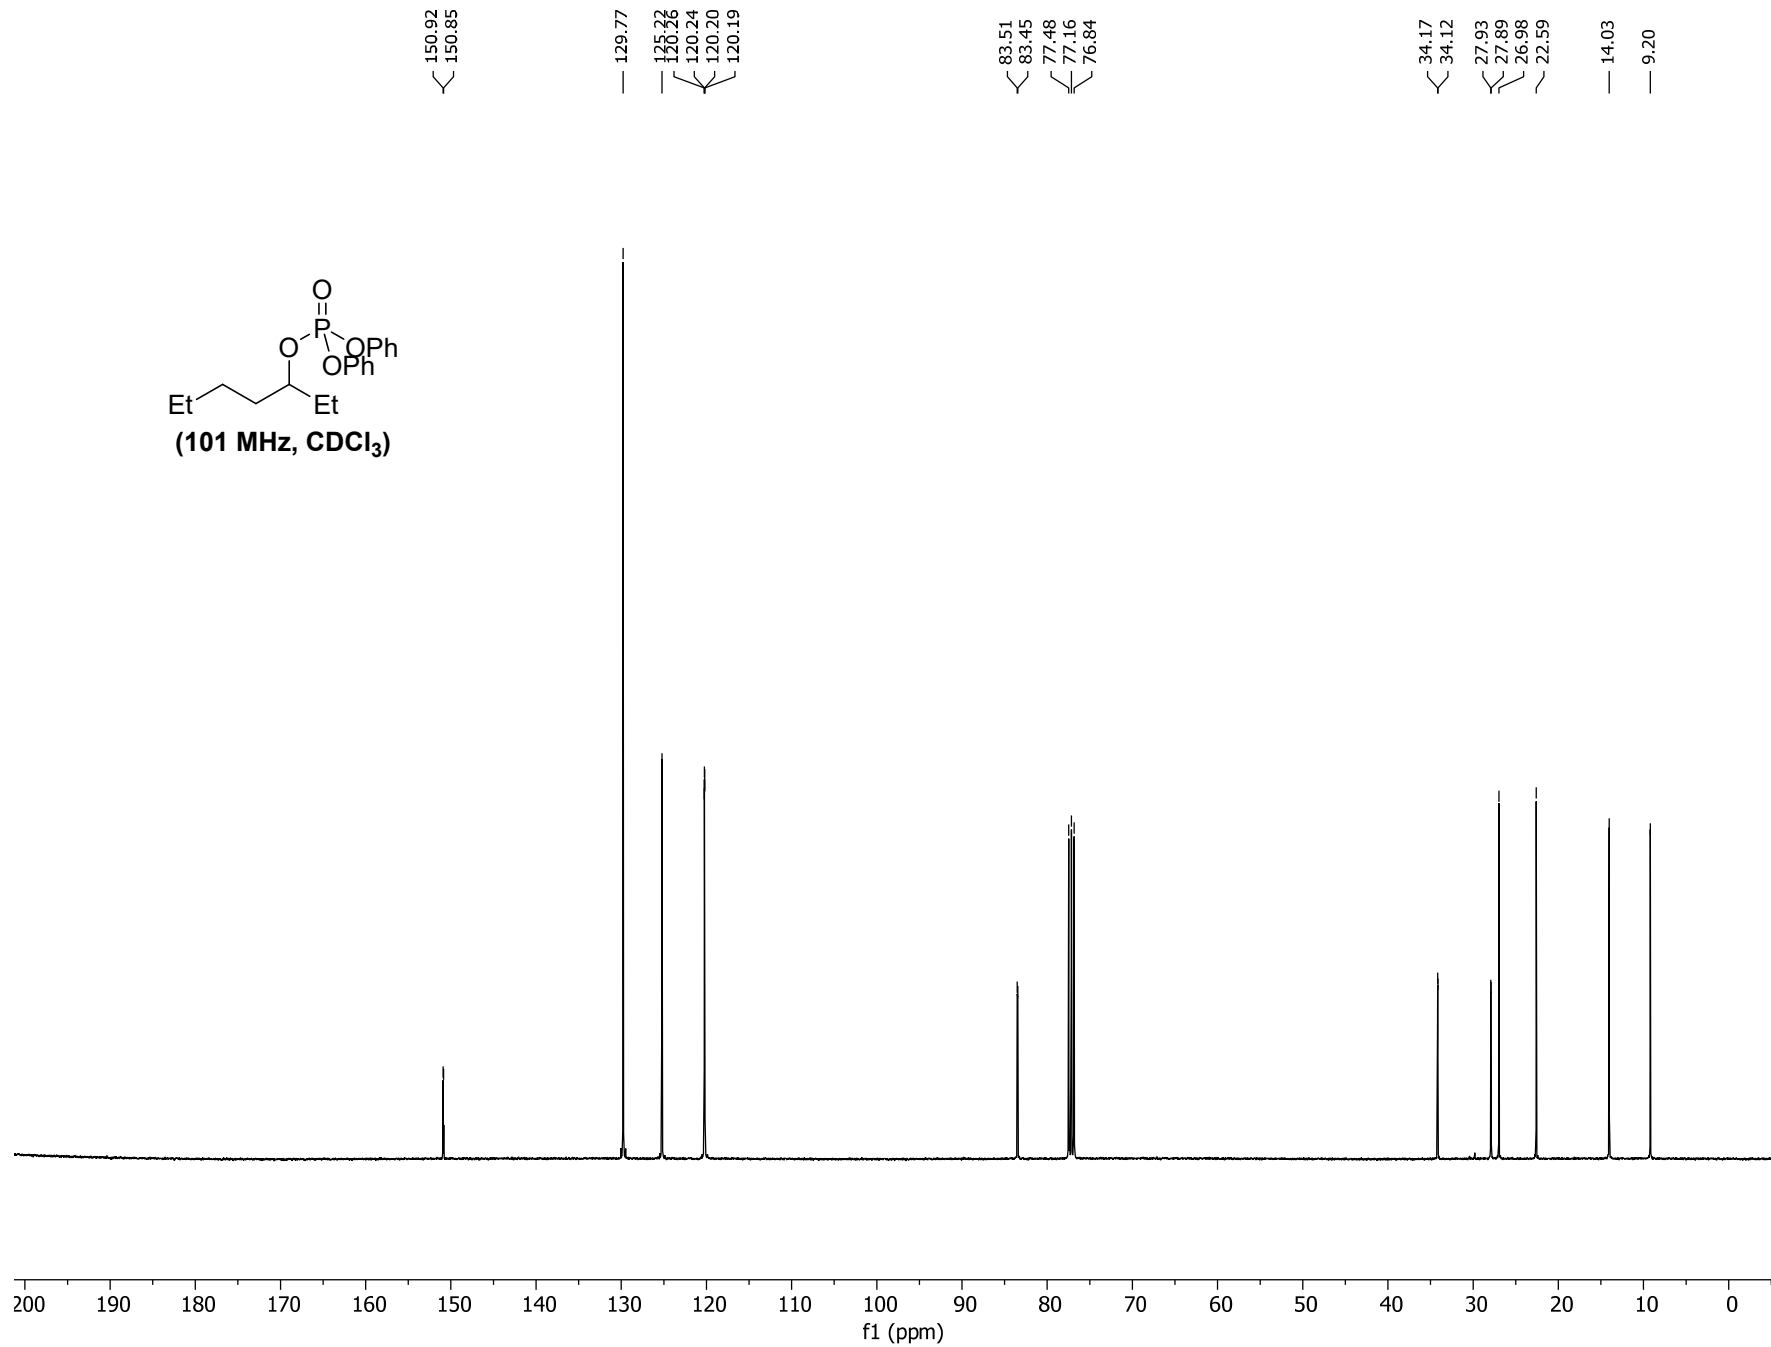

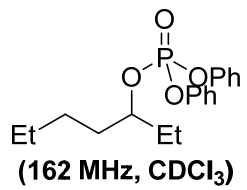

-12.33

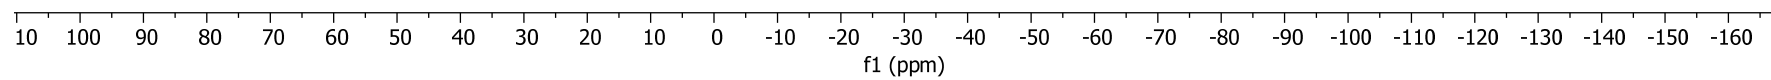

S-114

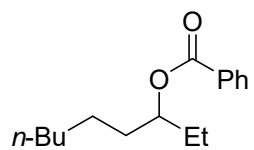

**Fig. 3, entry 20**  
**(400 MHz, CDCl<sub>3</sub>)**

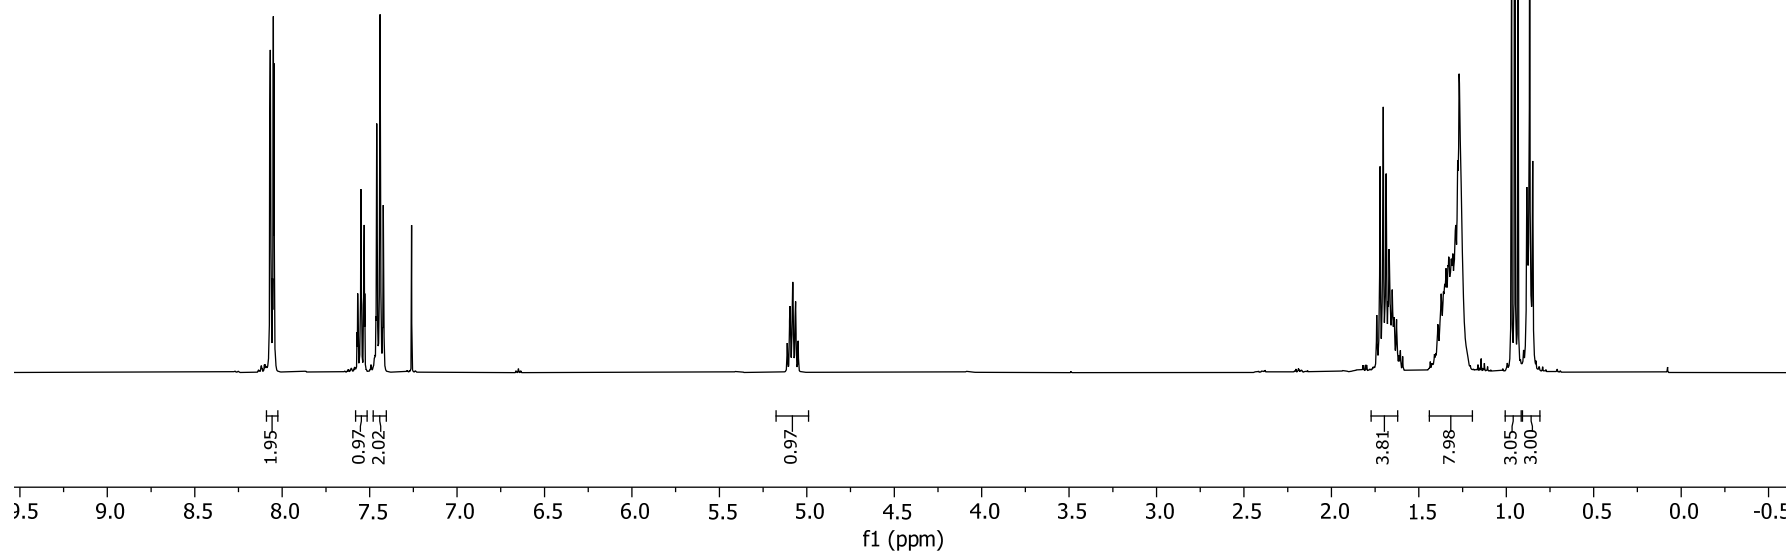

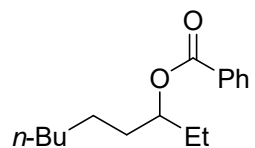

**Fig. 3, entry 20**  
(101 MHz, CDCl<sub>3</sub>)

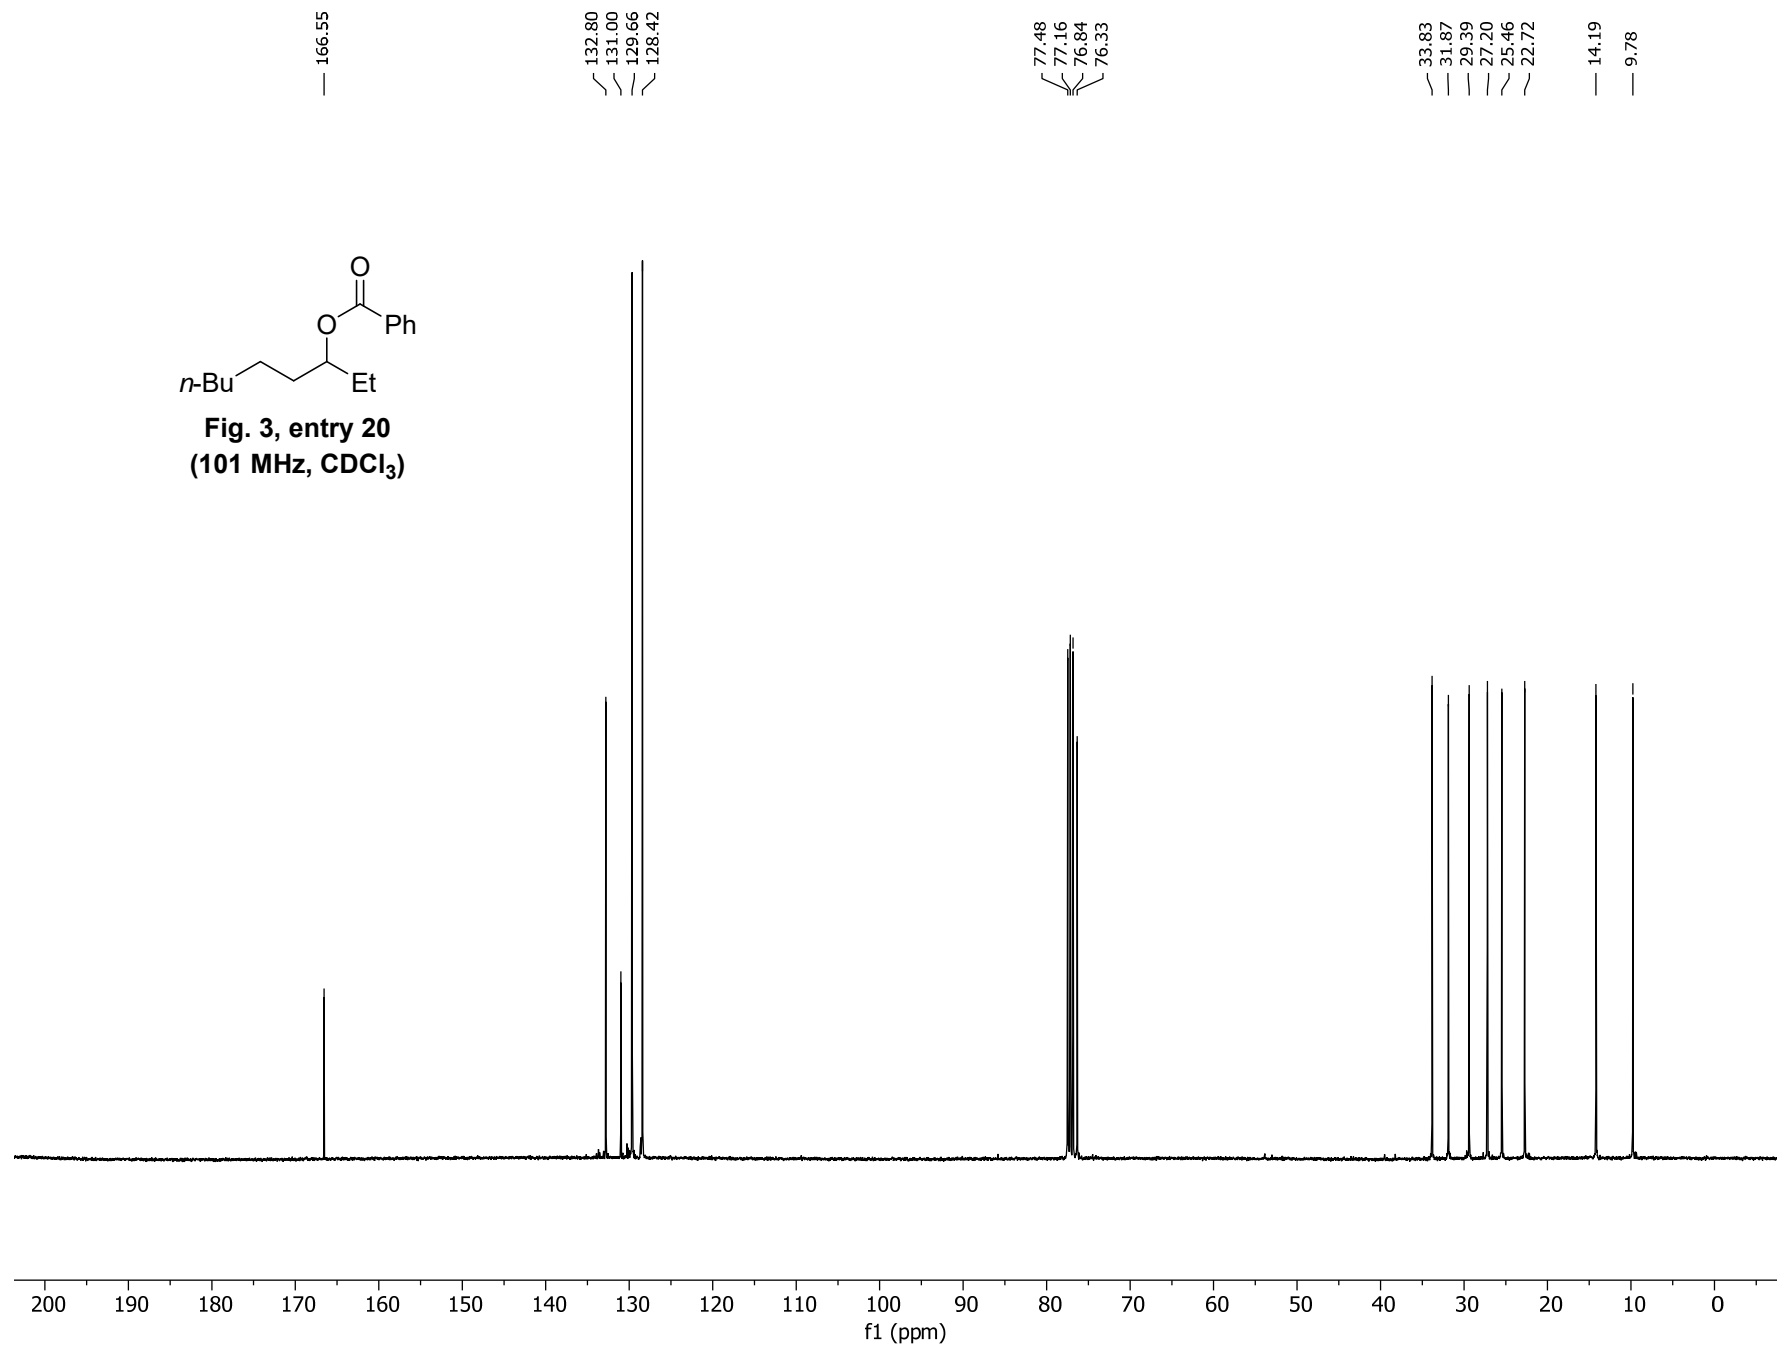

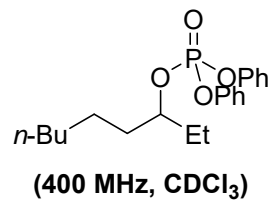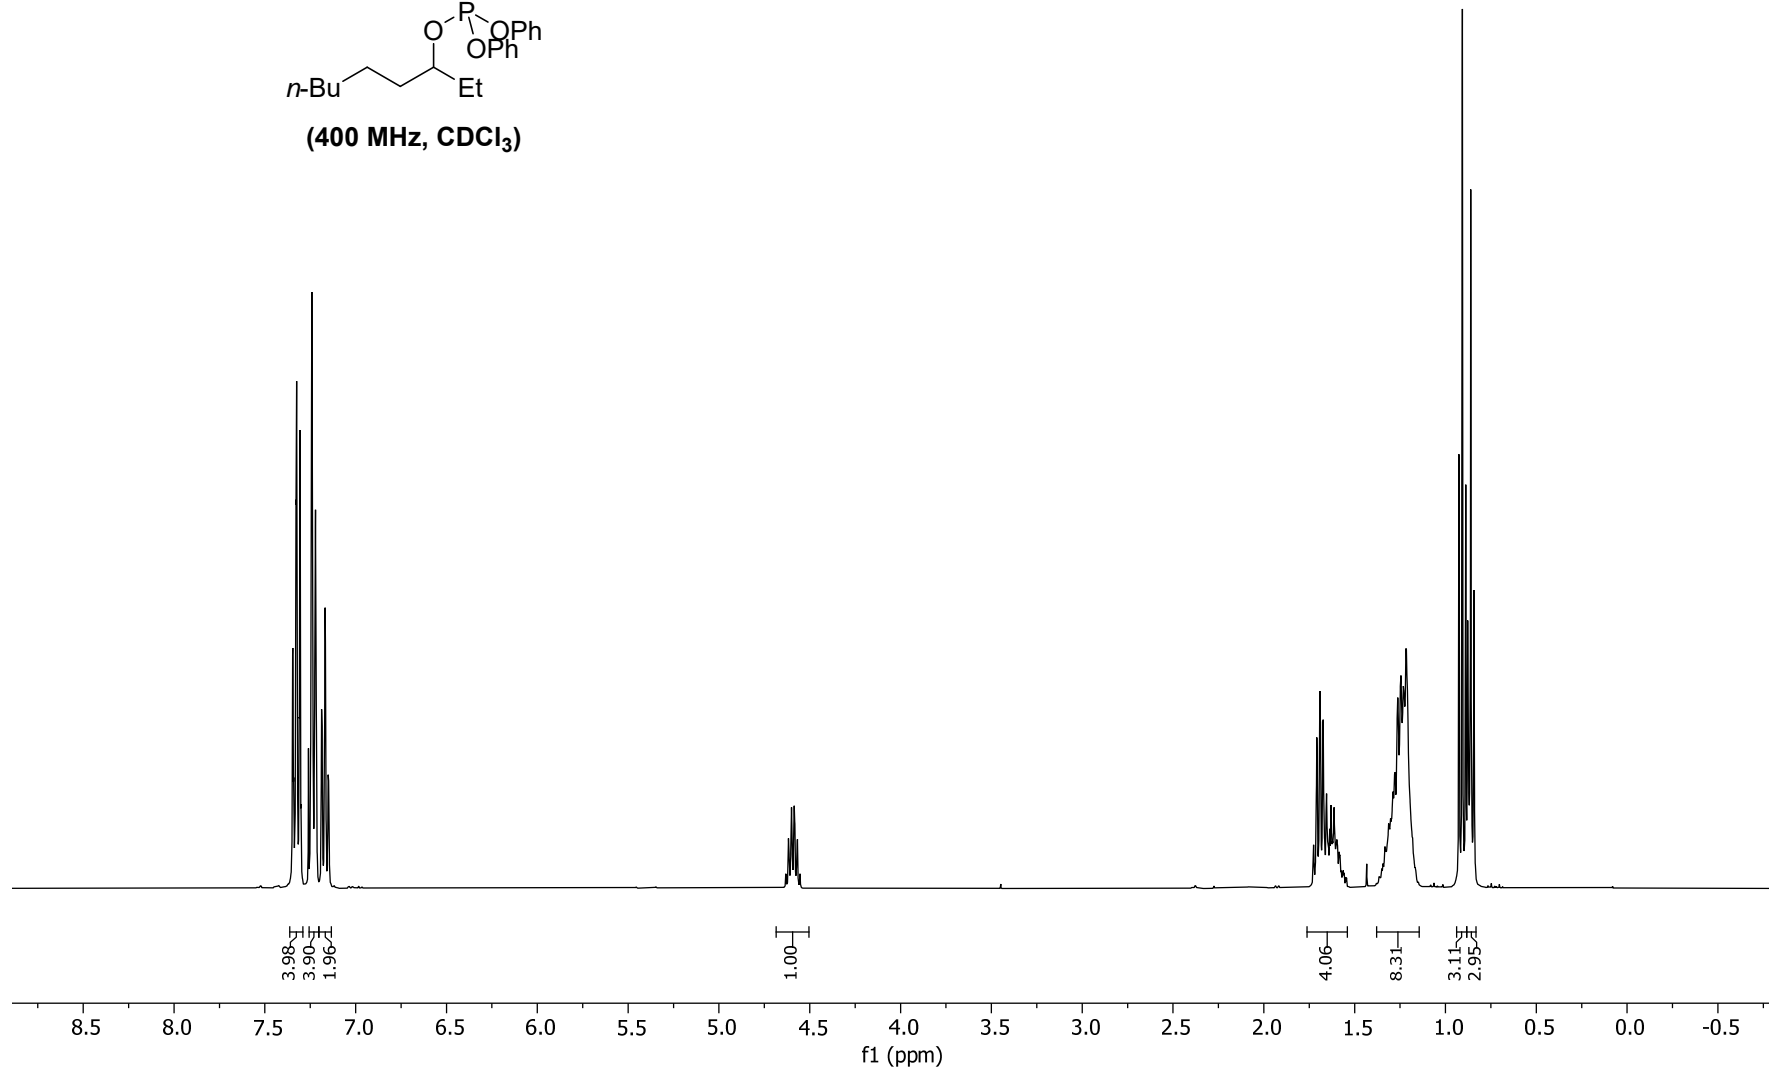

S-117

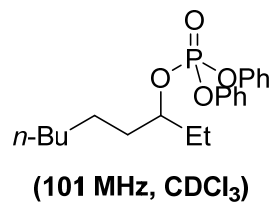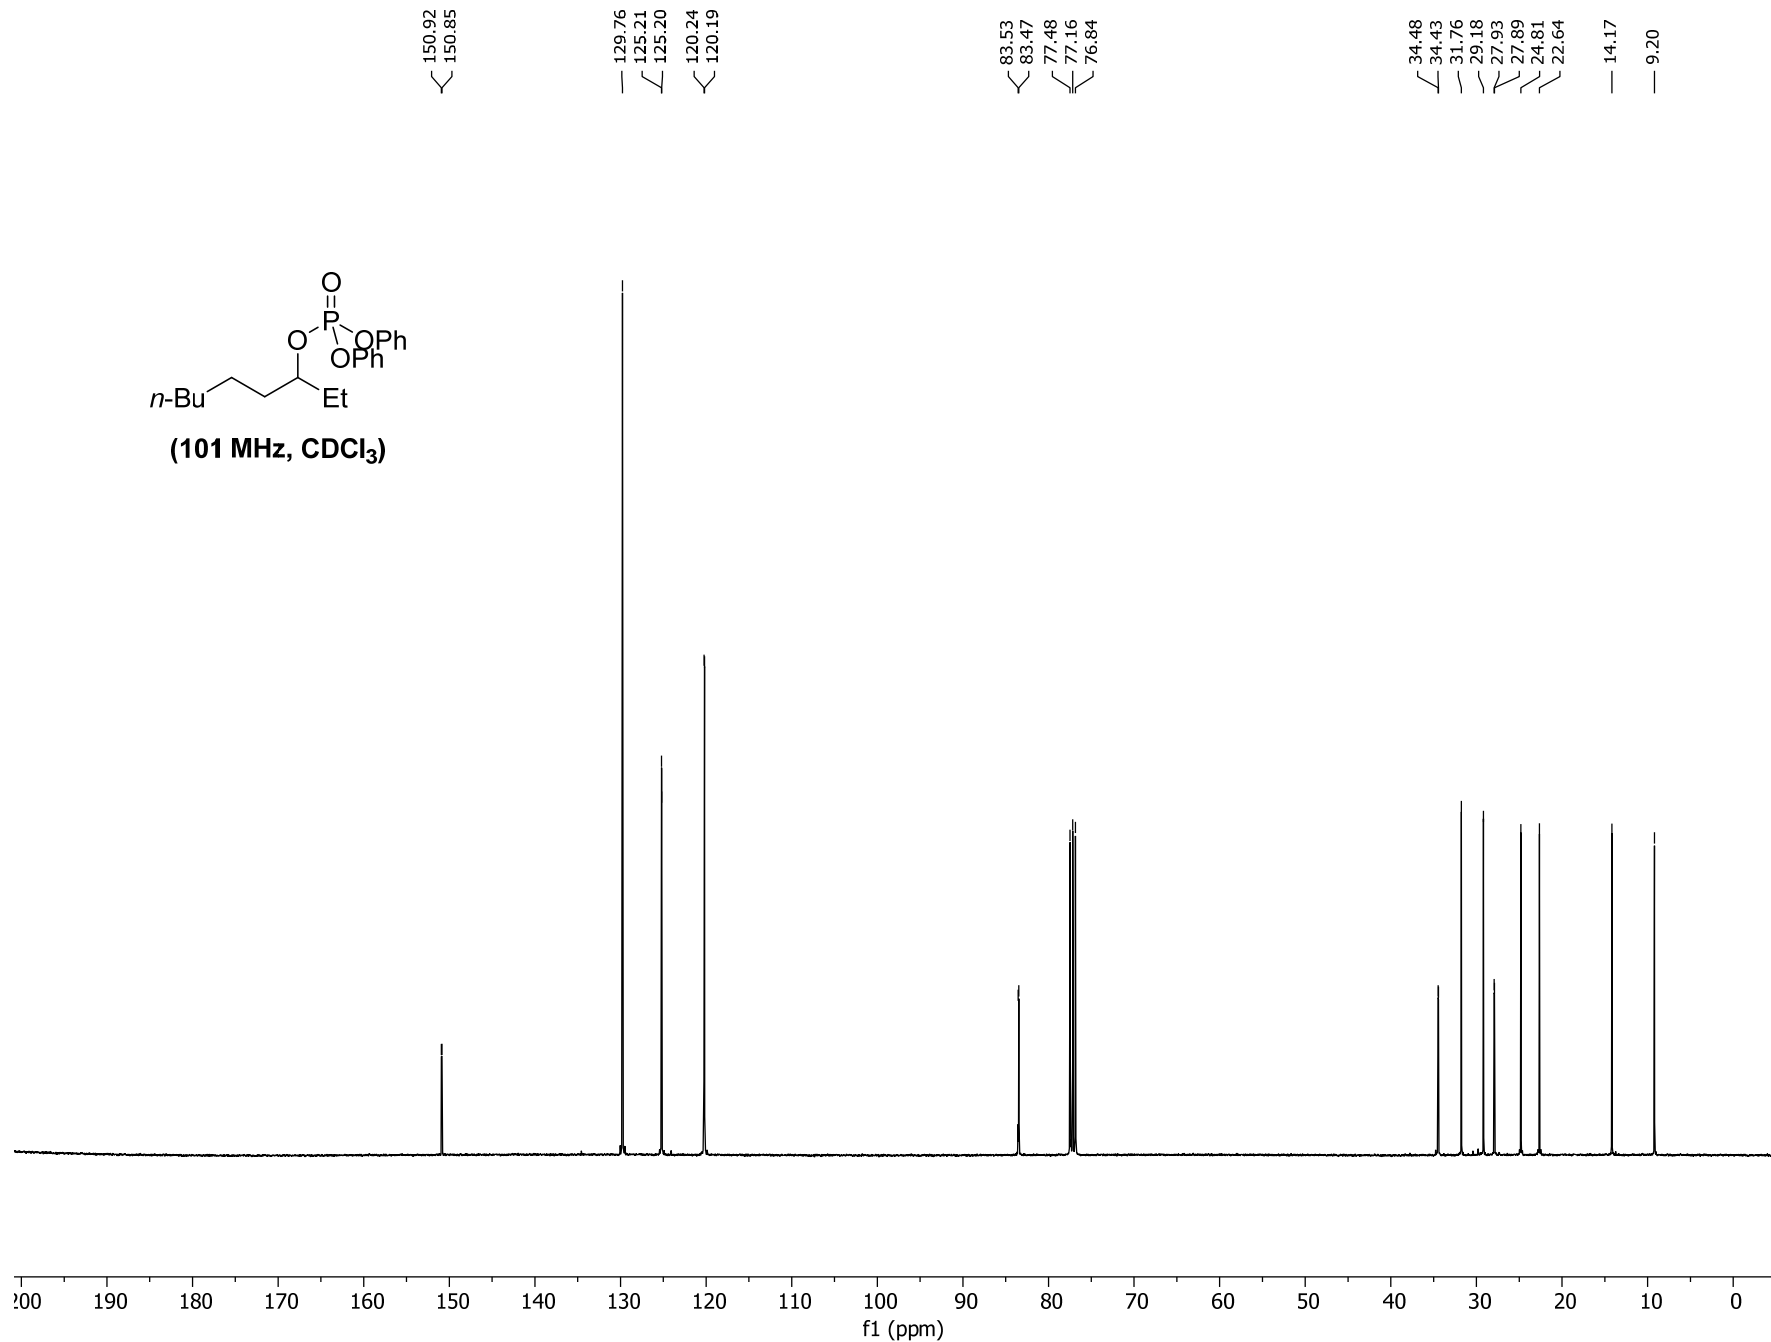

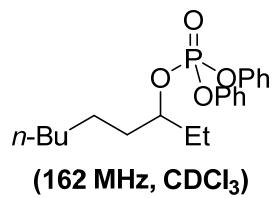

— -12.34

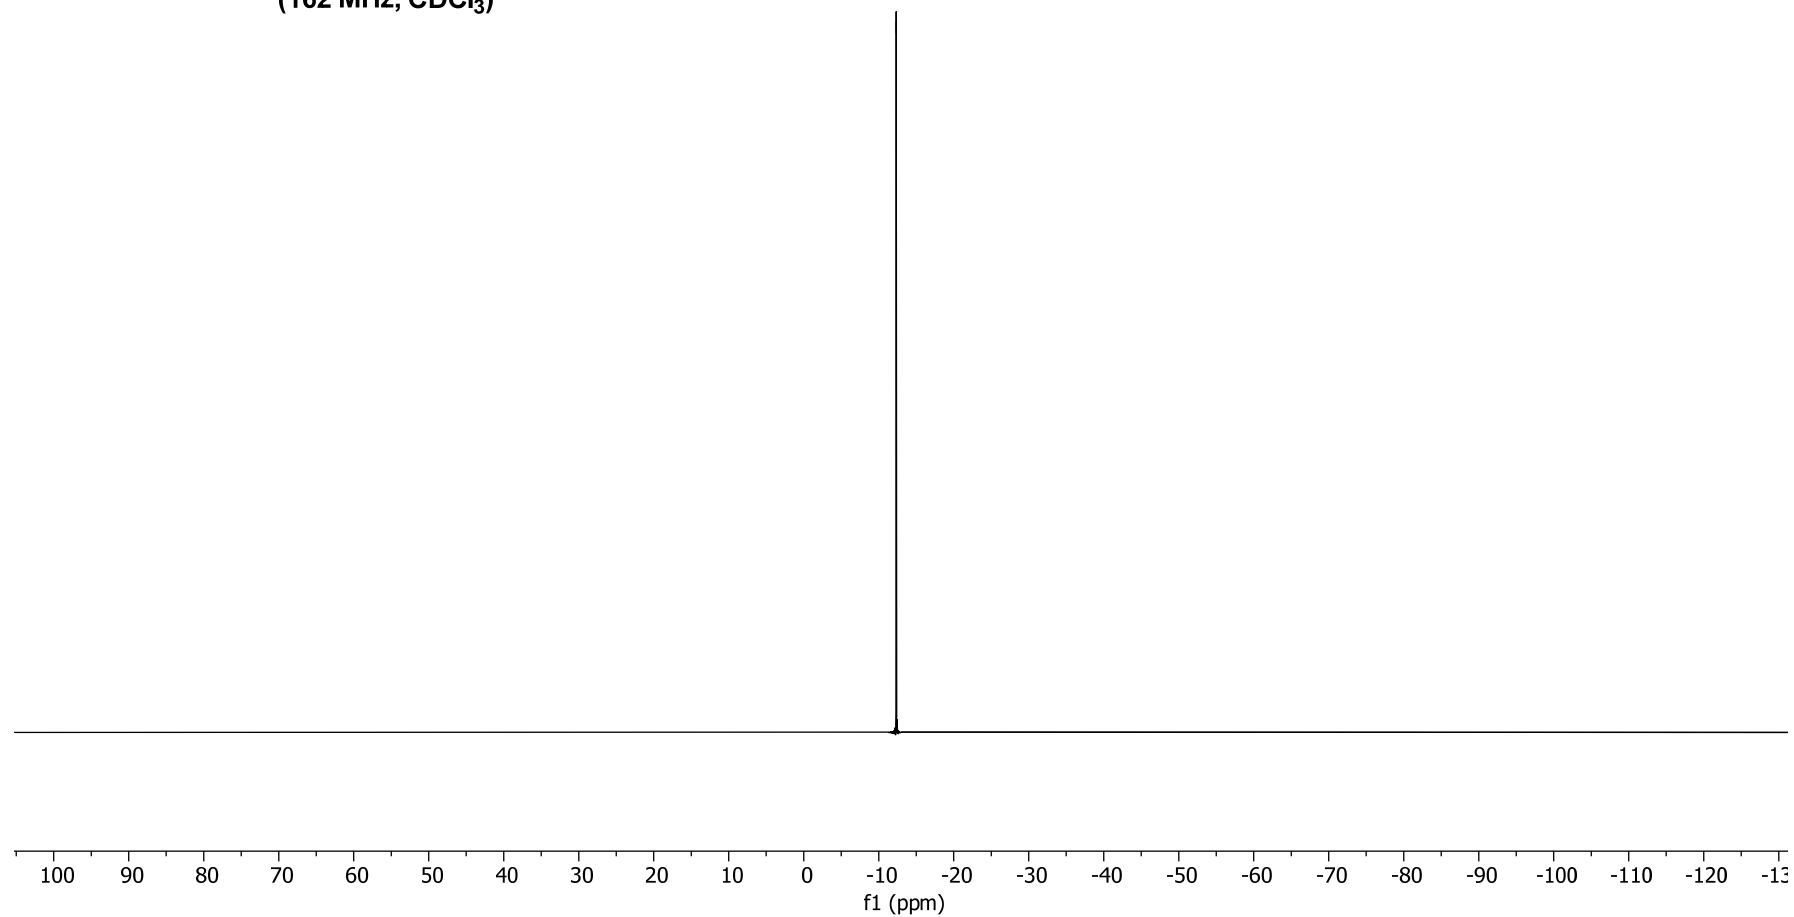

S-119

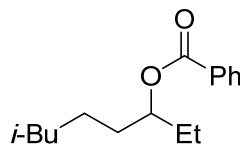

**Fig. 3, entry 21**  
**(400 MHz, CDCl<sub>3</sub>)**

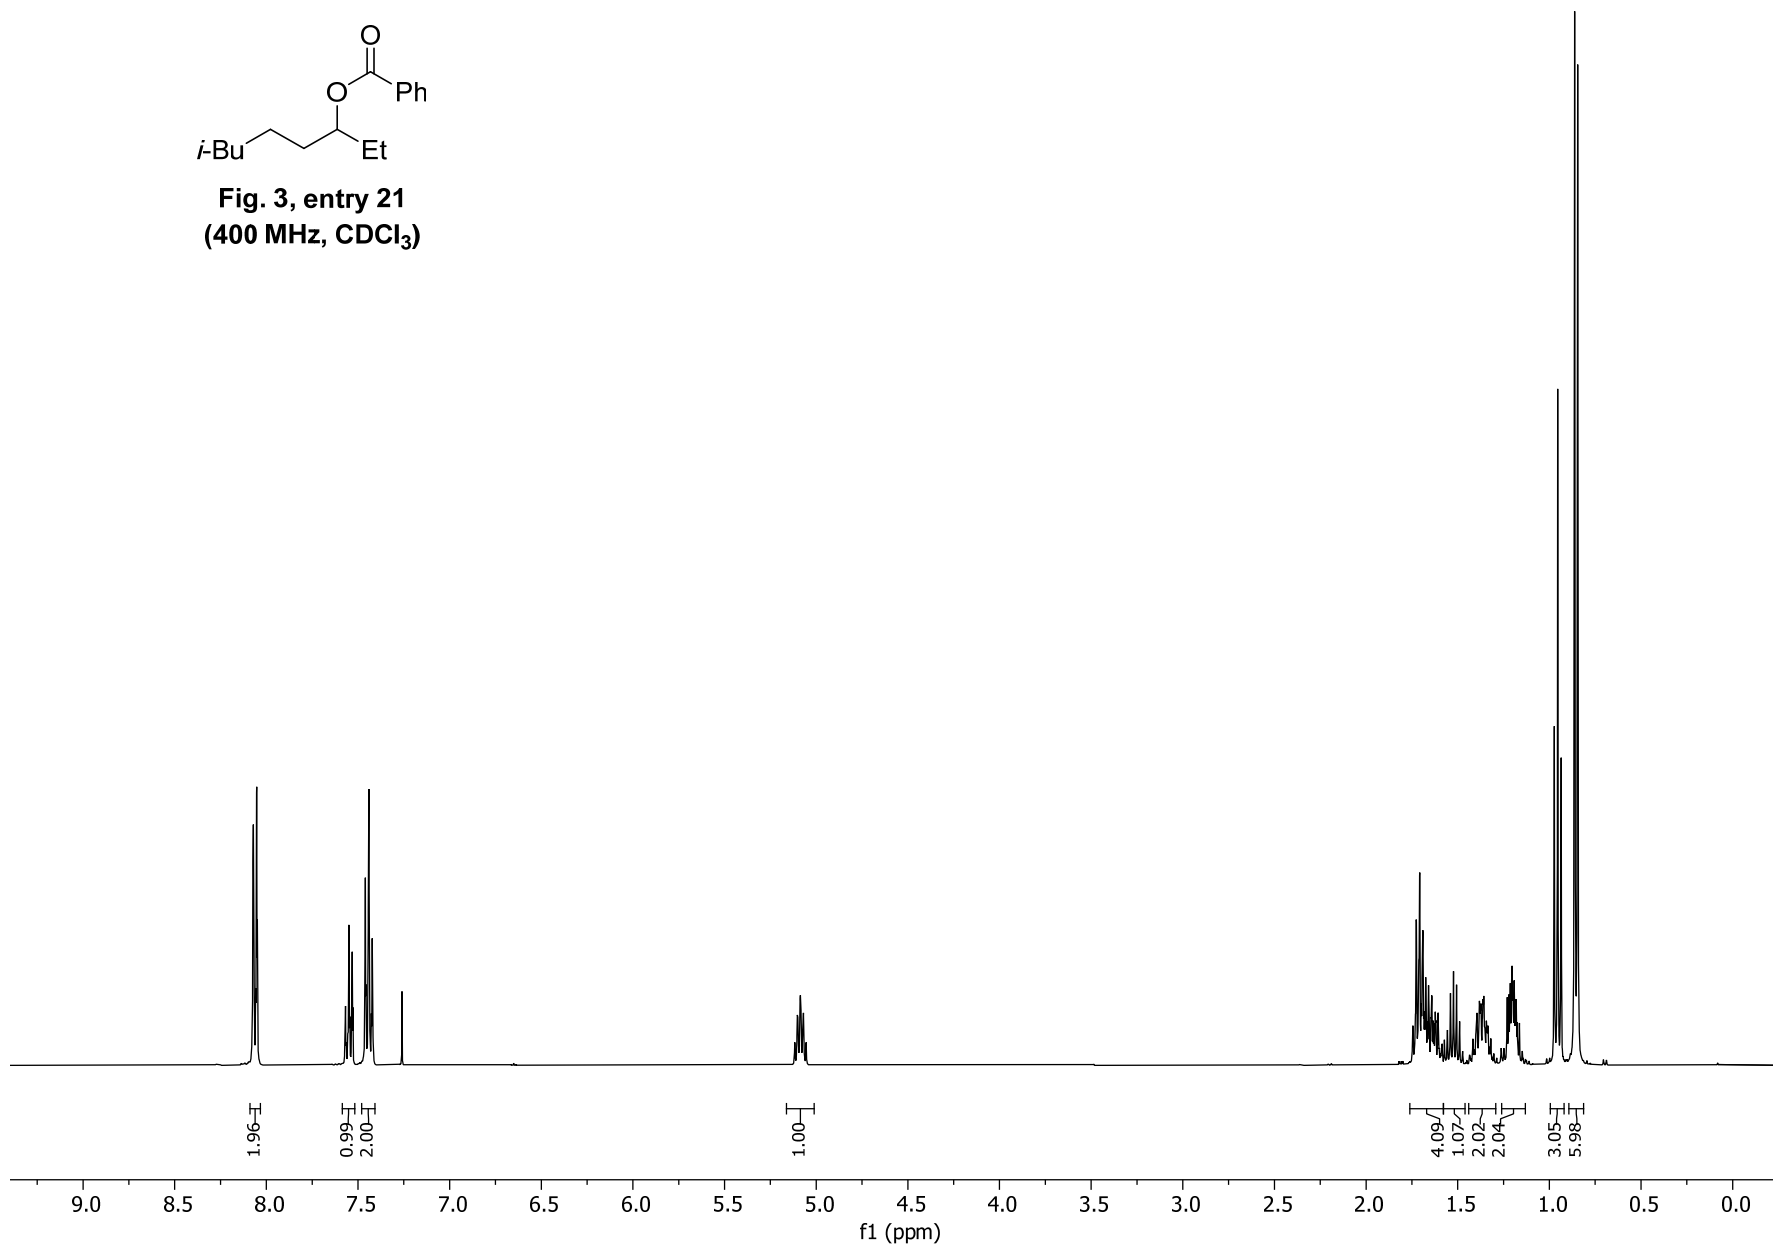



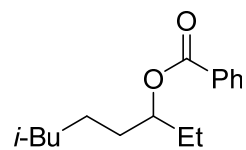

**Fig. 3, entry 21**  
**(101 MHz, CDCl<sub>3</sub>)**

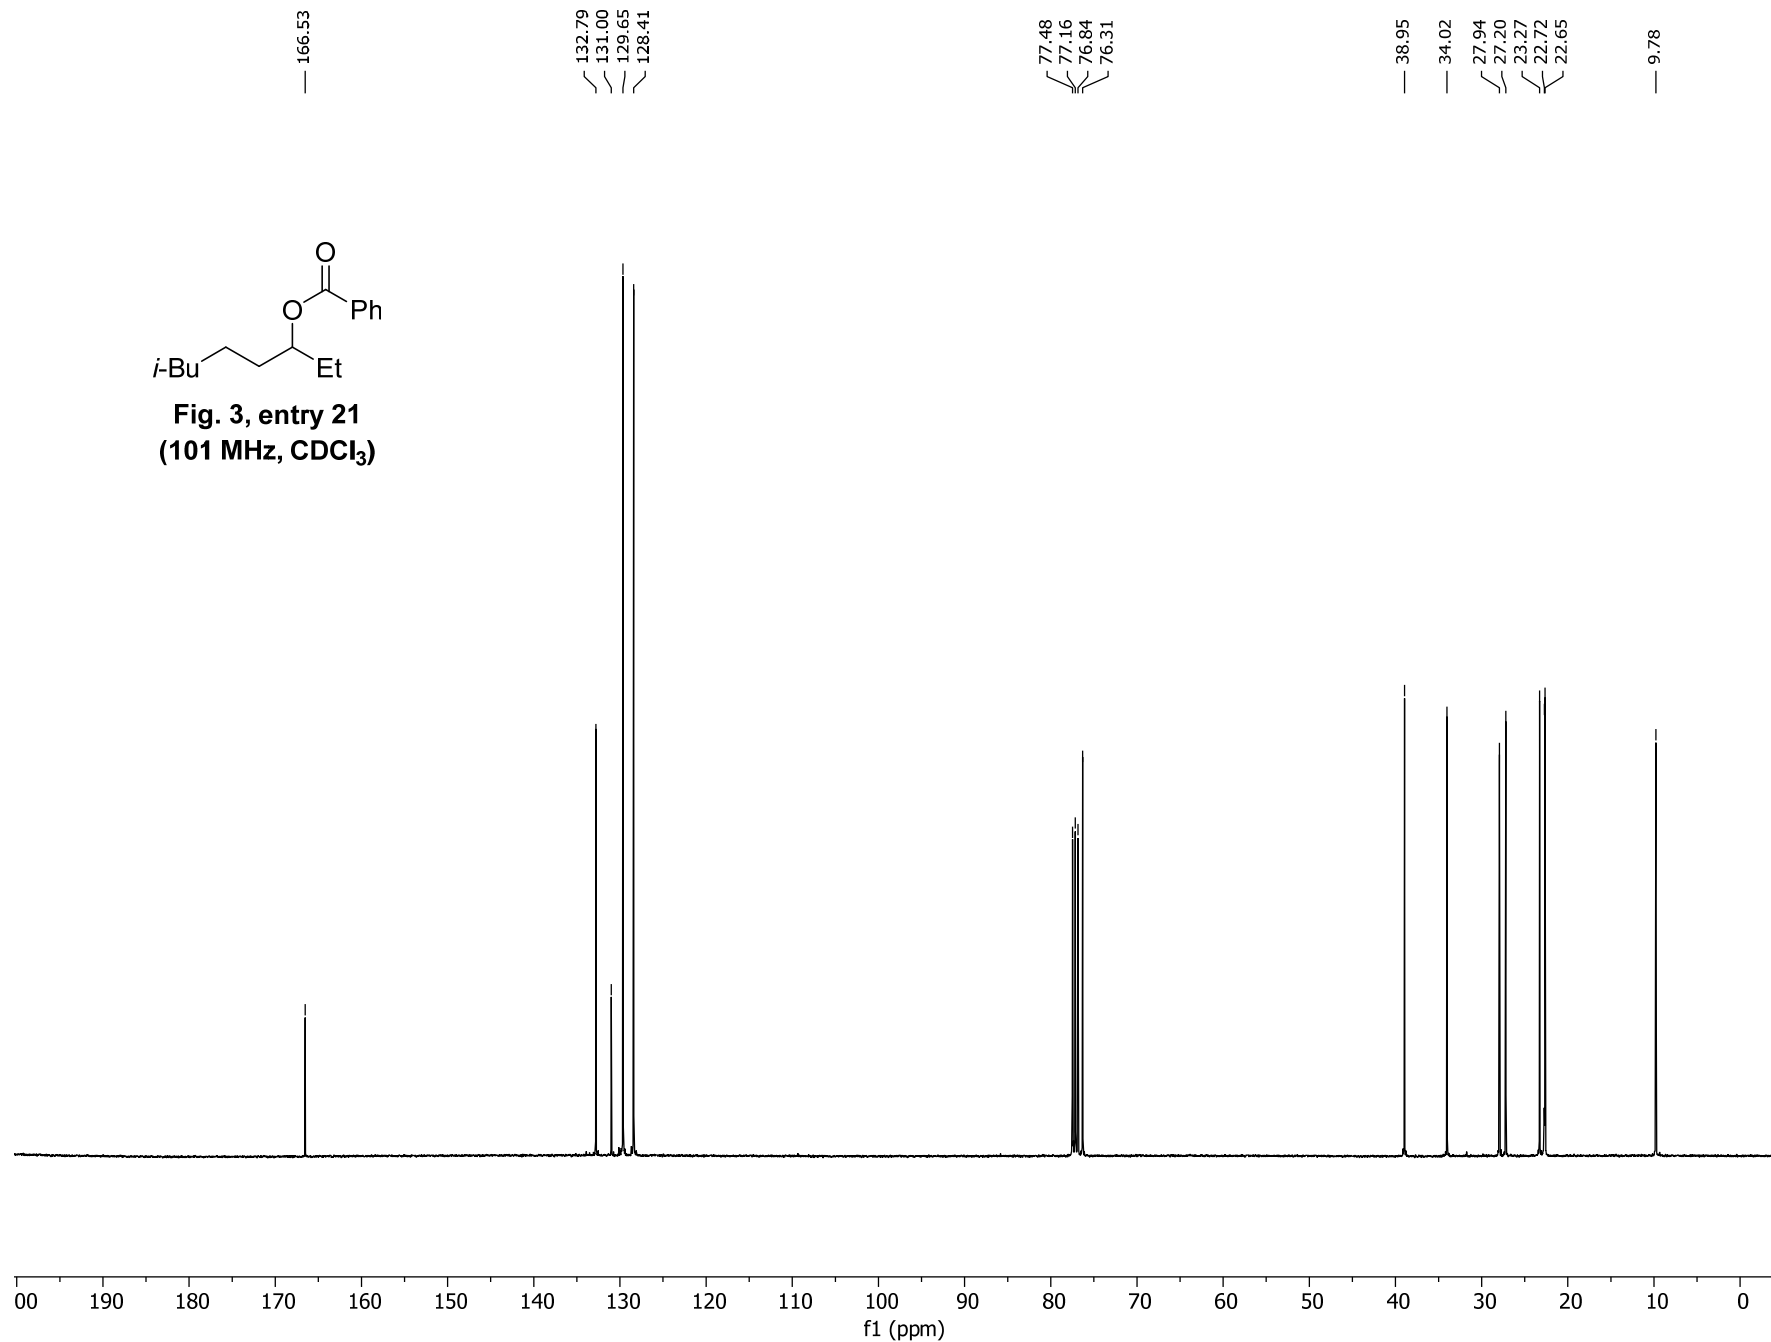

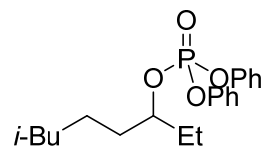

(400 MHz, CDCl<sub>3</sub>)

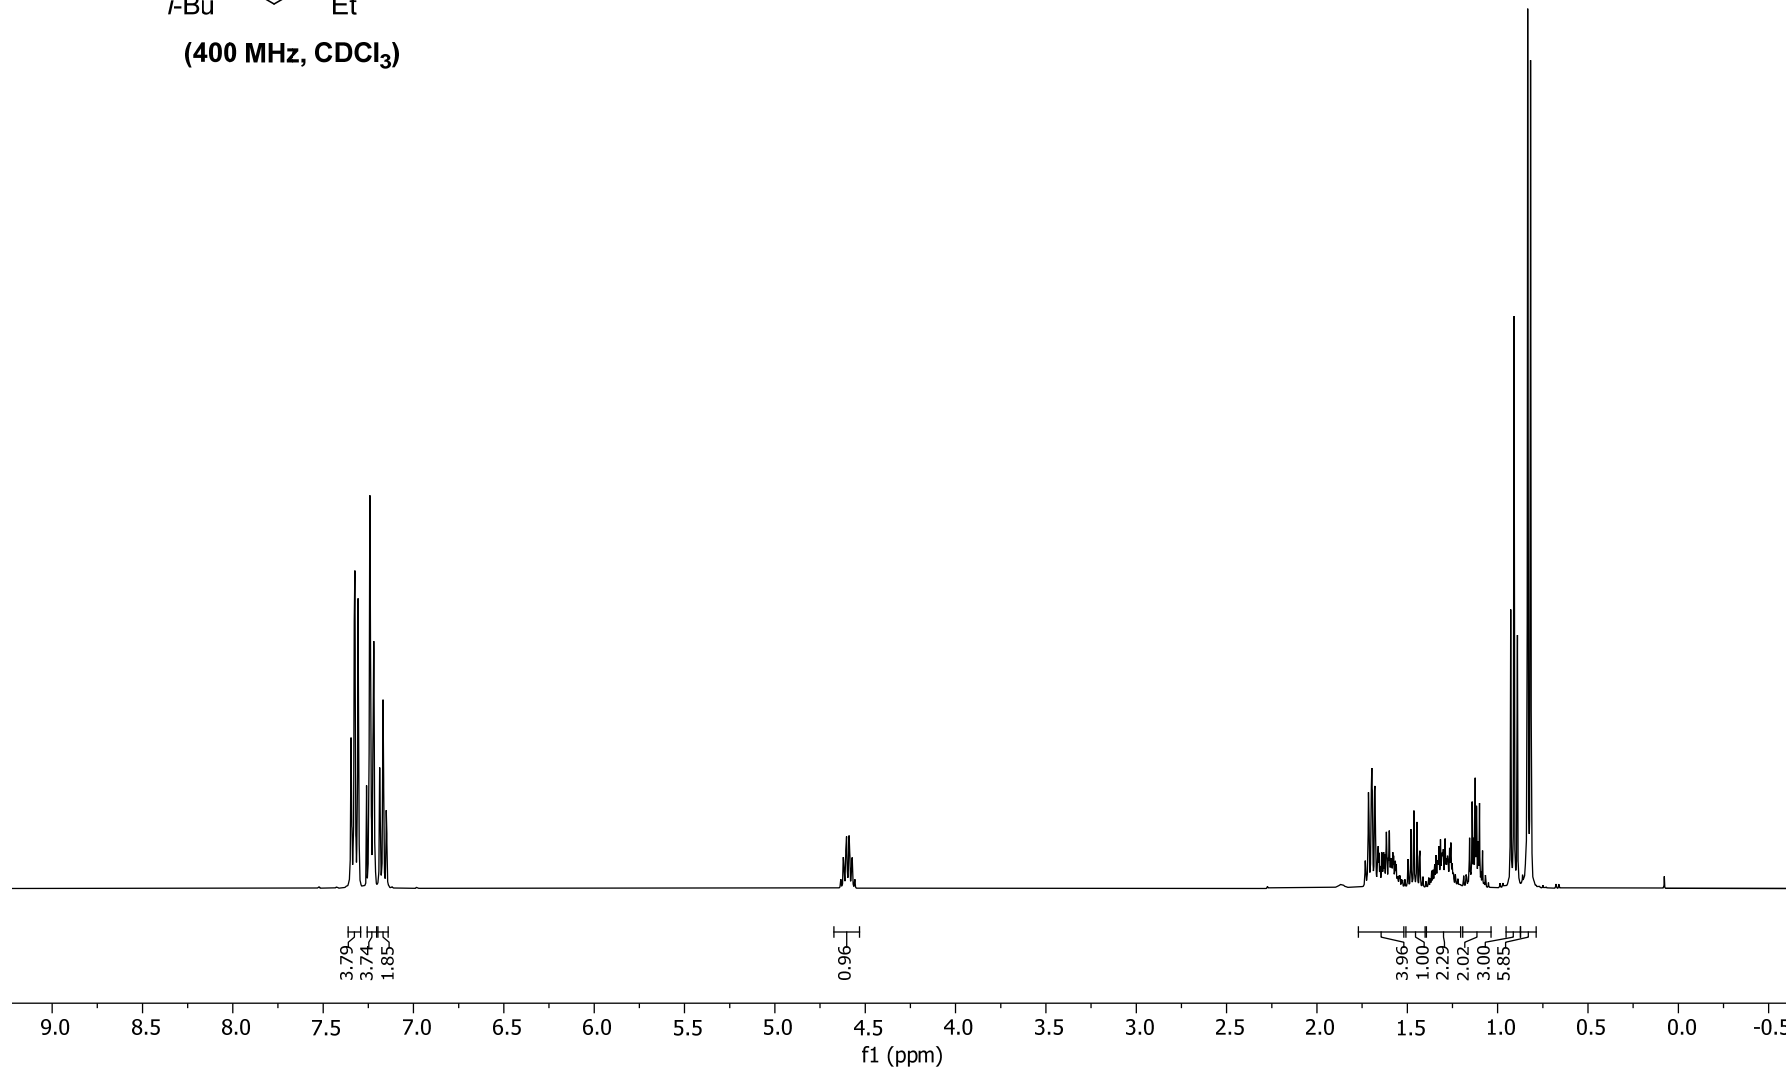

S-122

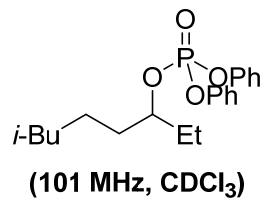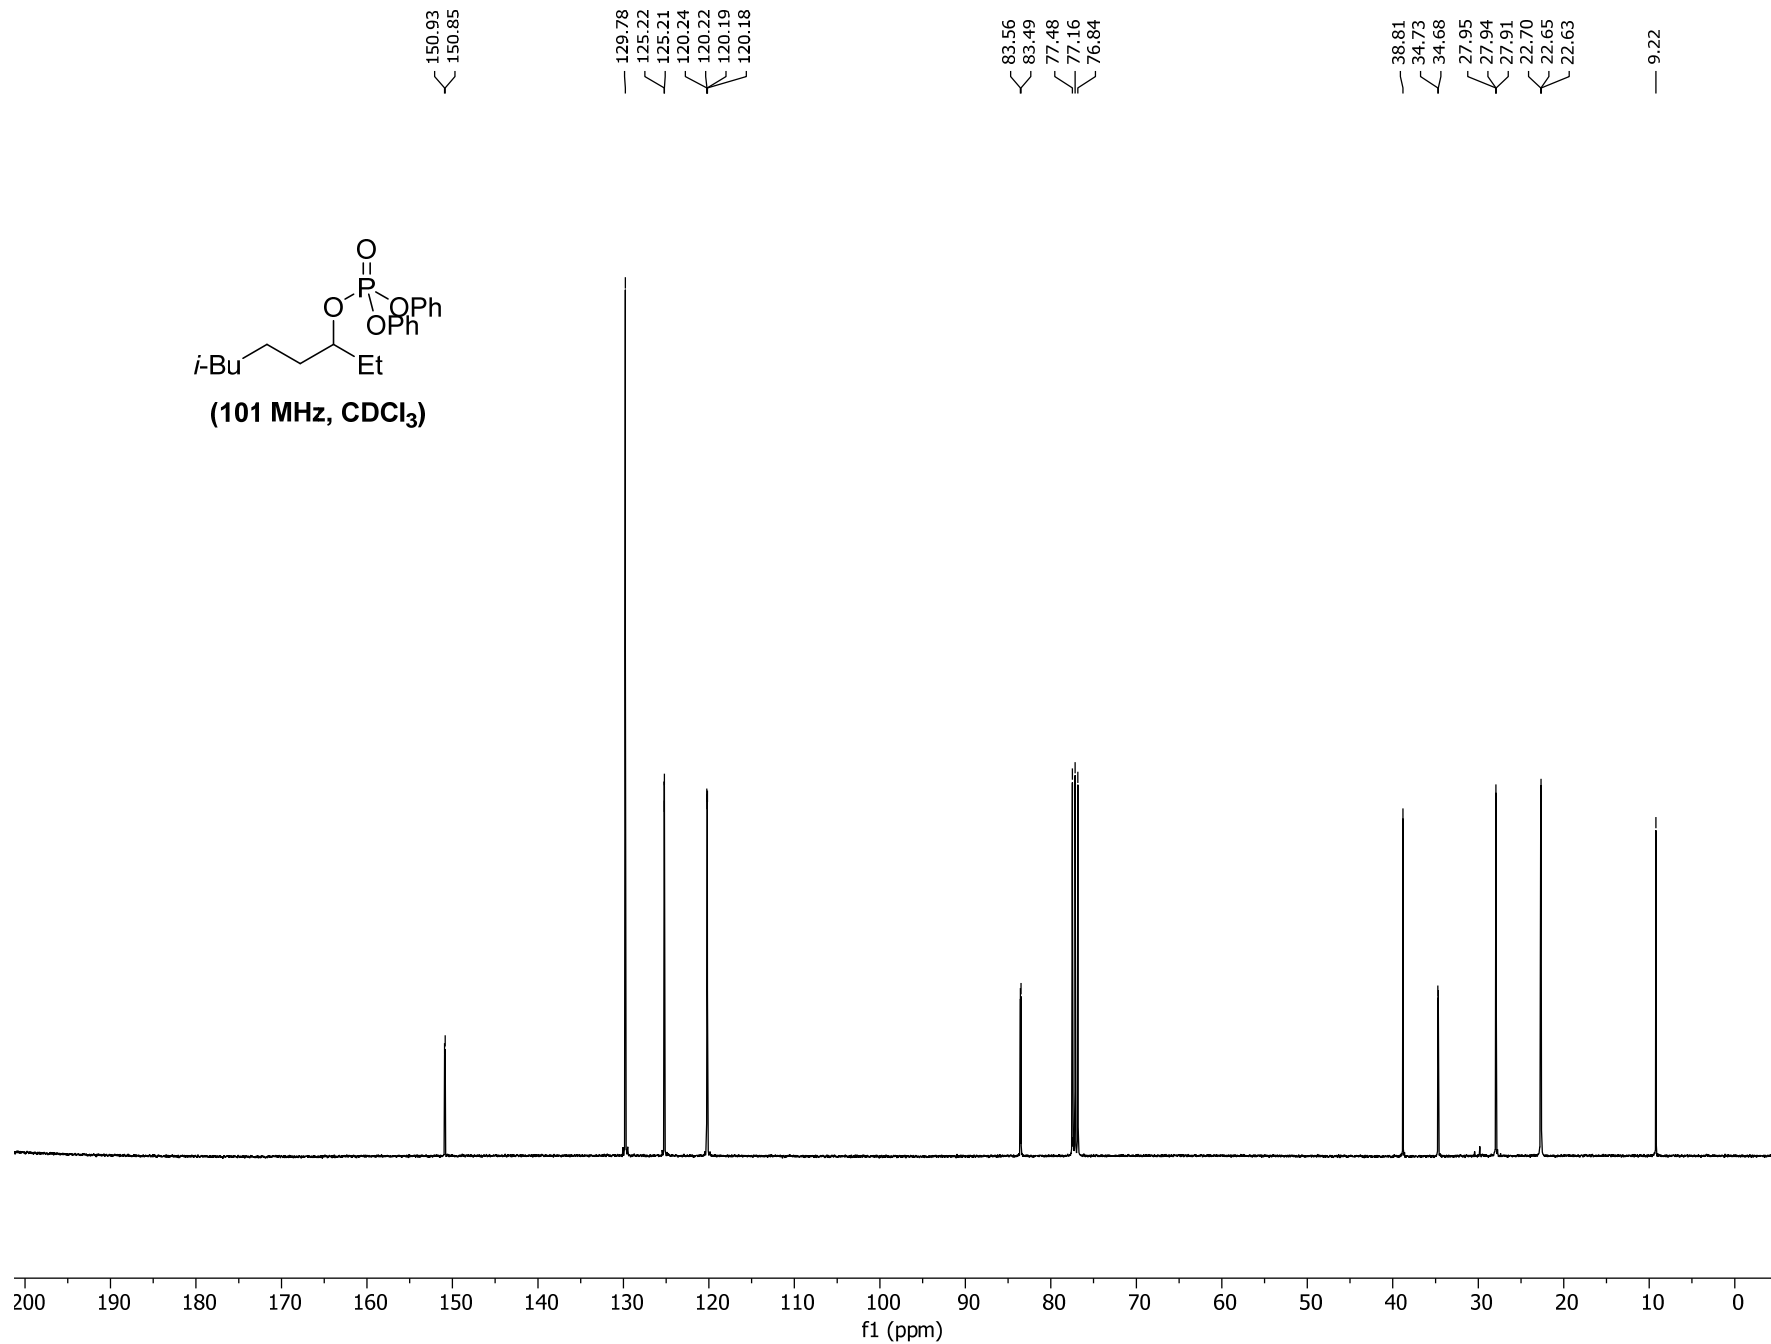

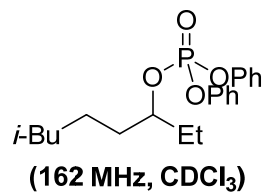

— -12.34

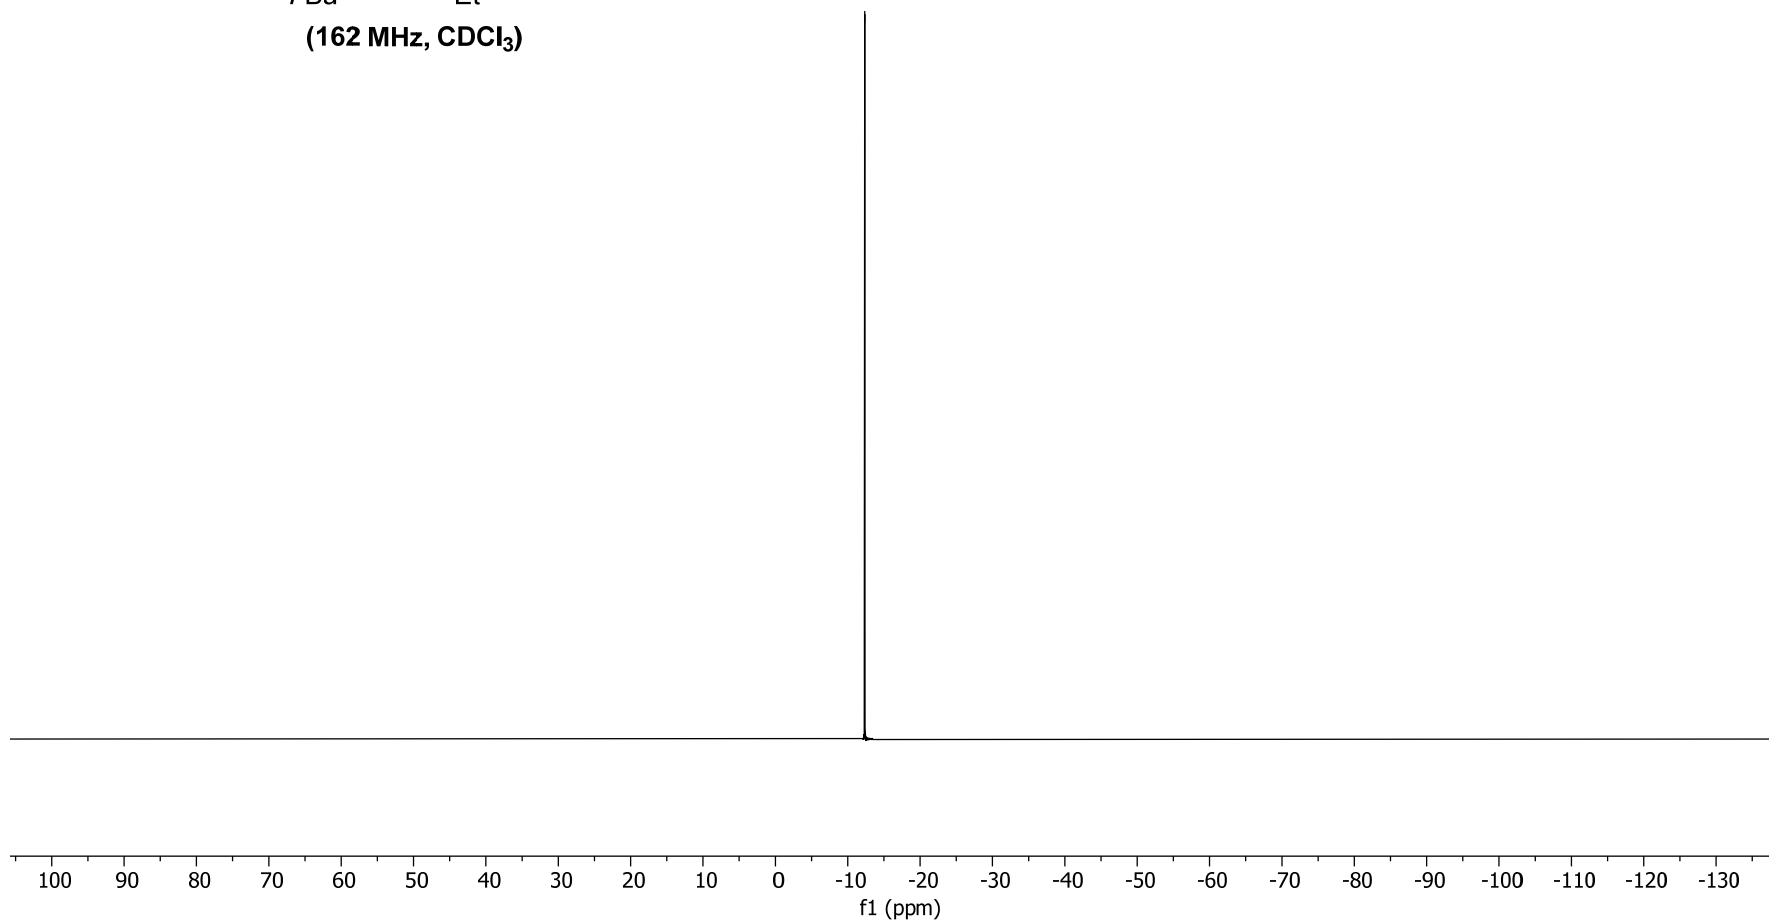

S-124

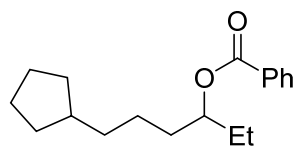

**Fig. 3, entry 22**  
**(400 MHz, CDCl<sub>3</sub>)**

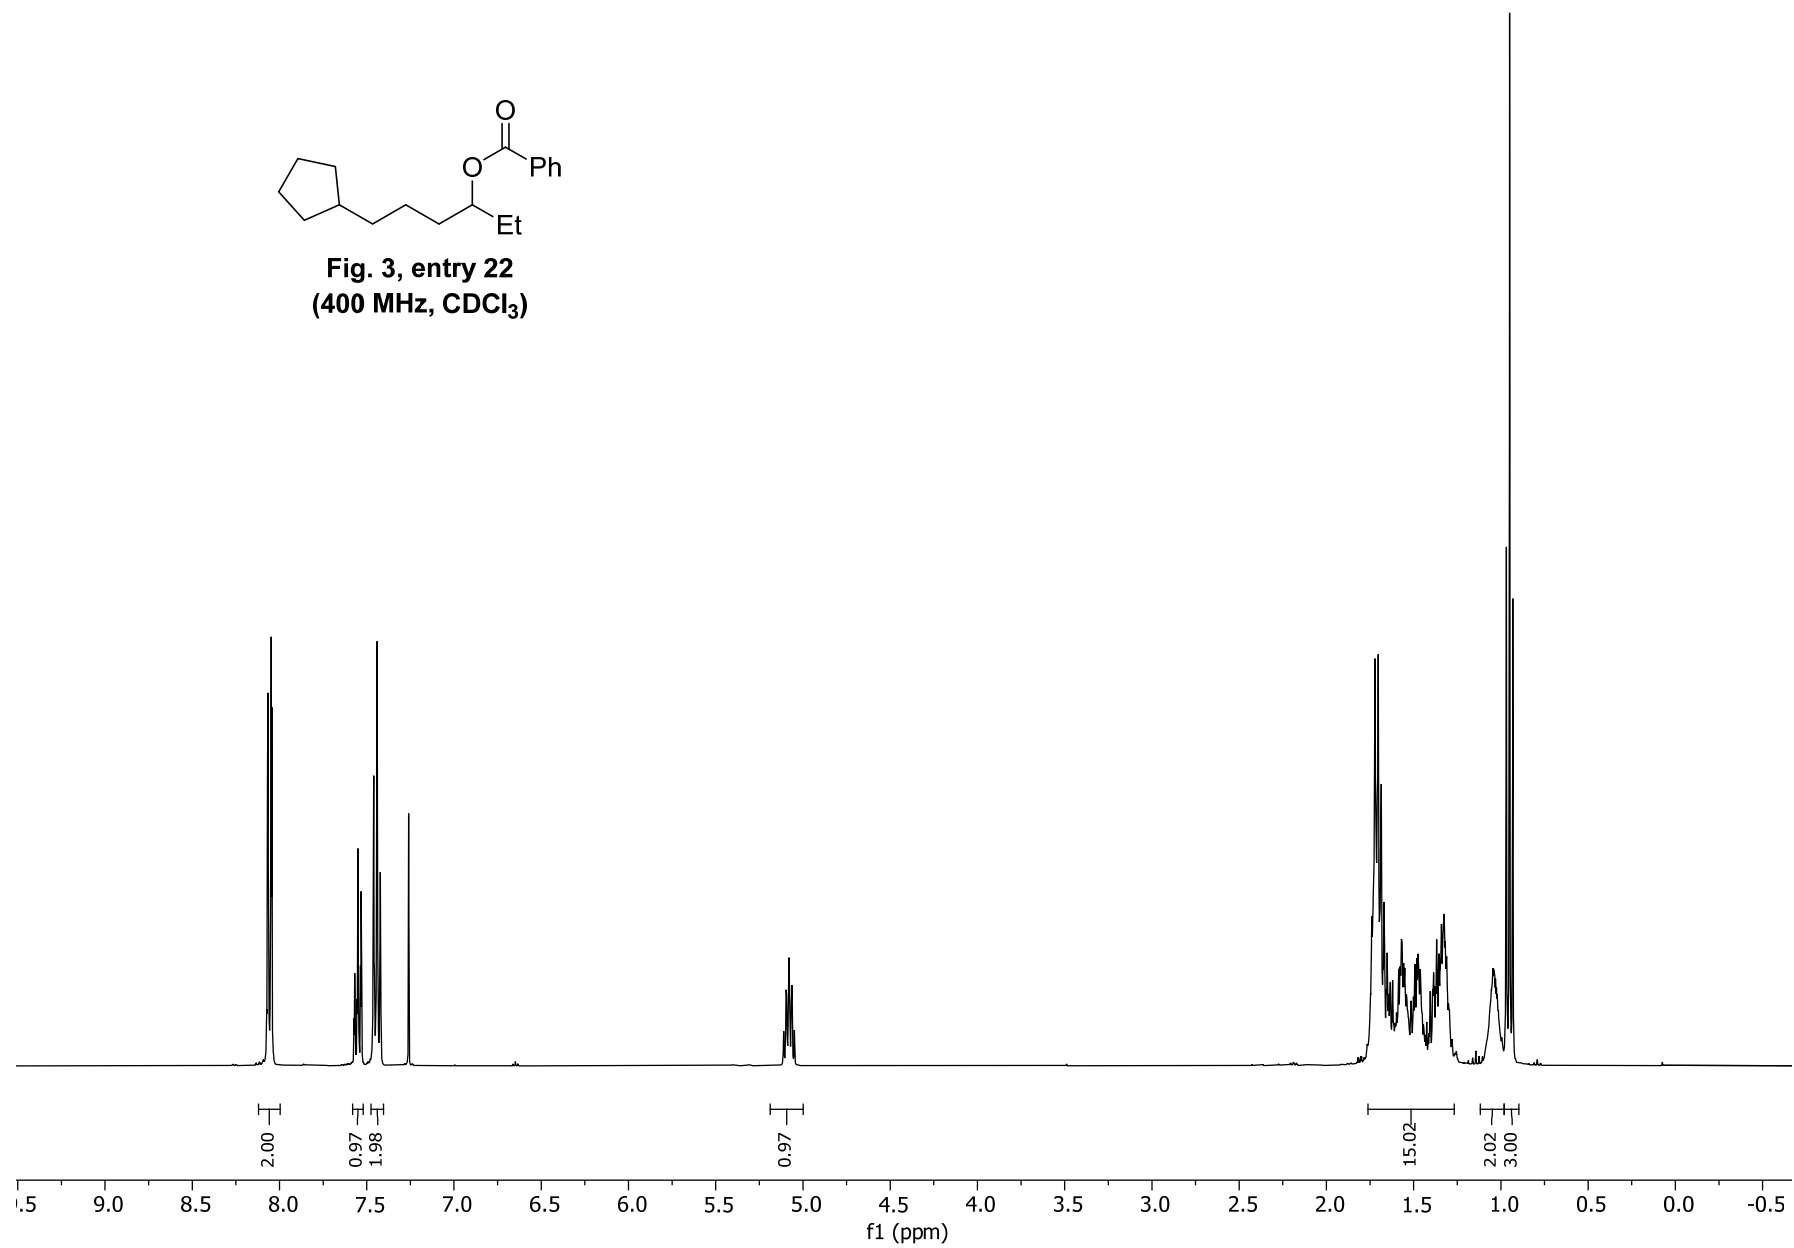

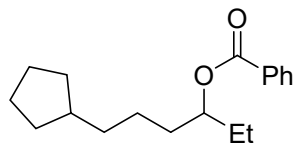

**Fig. 3, entry 22**  
**(101 MHz, CDCl<sub>3</sub>)**

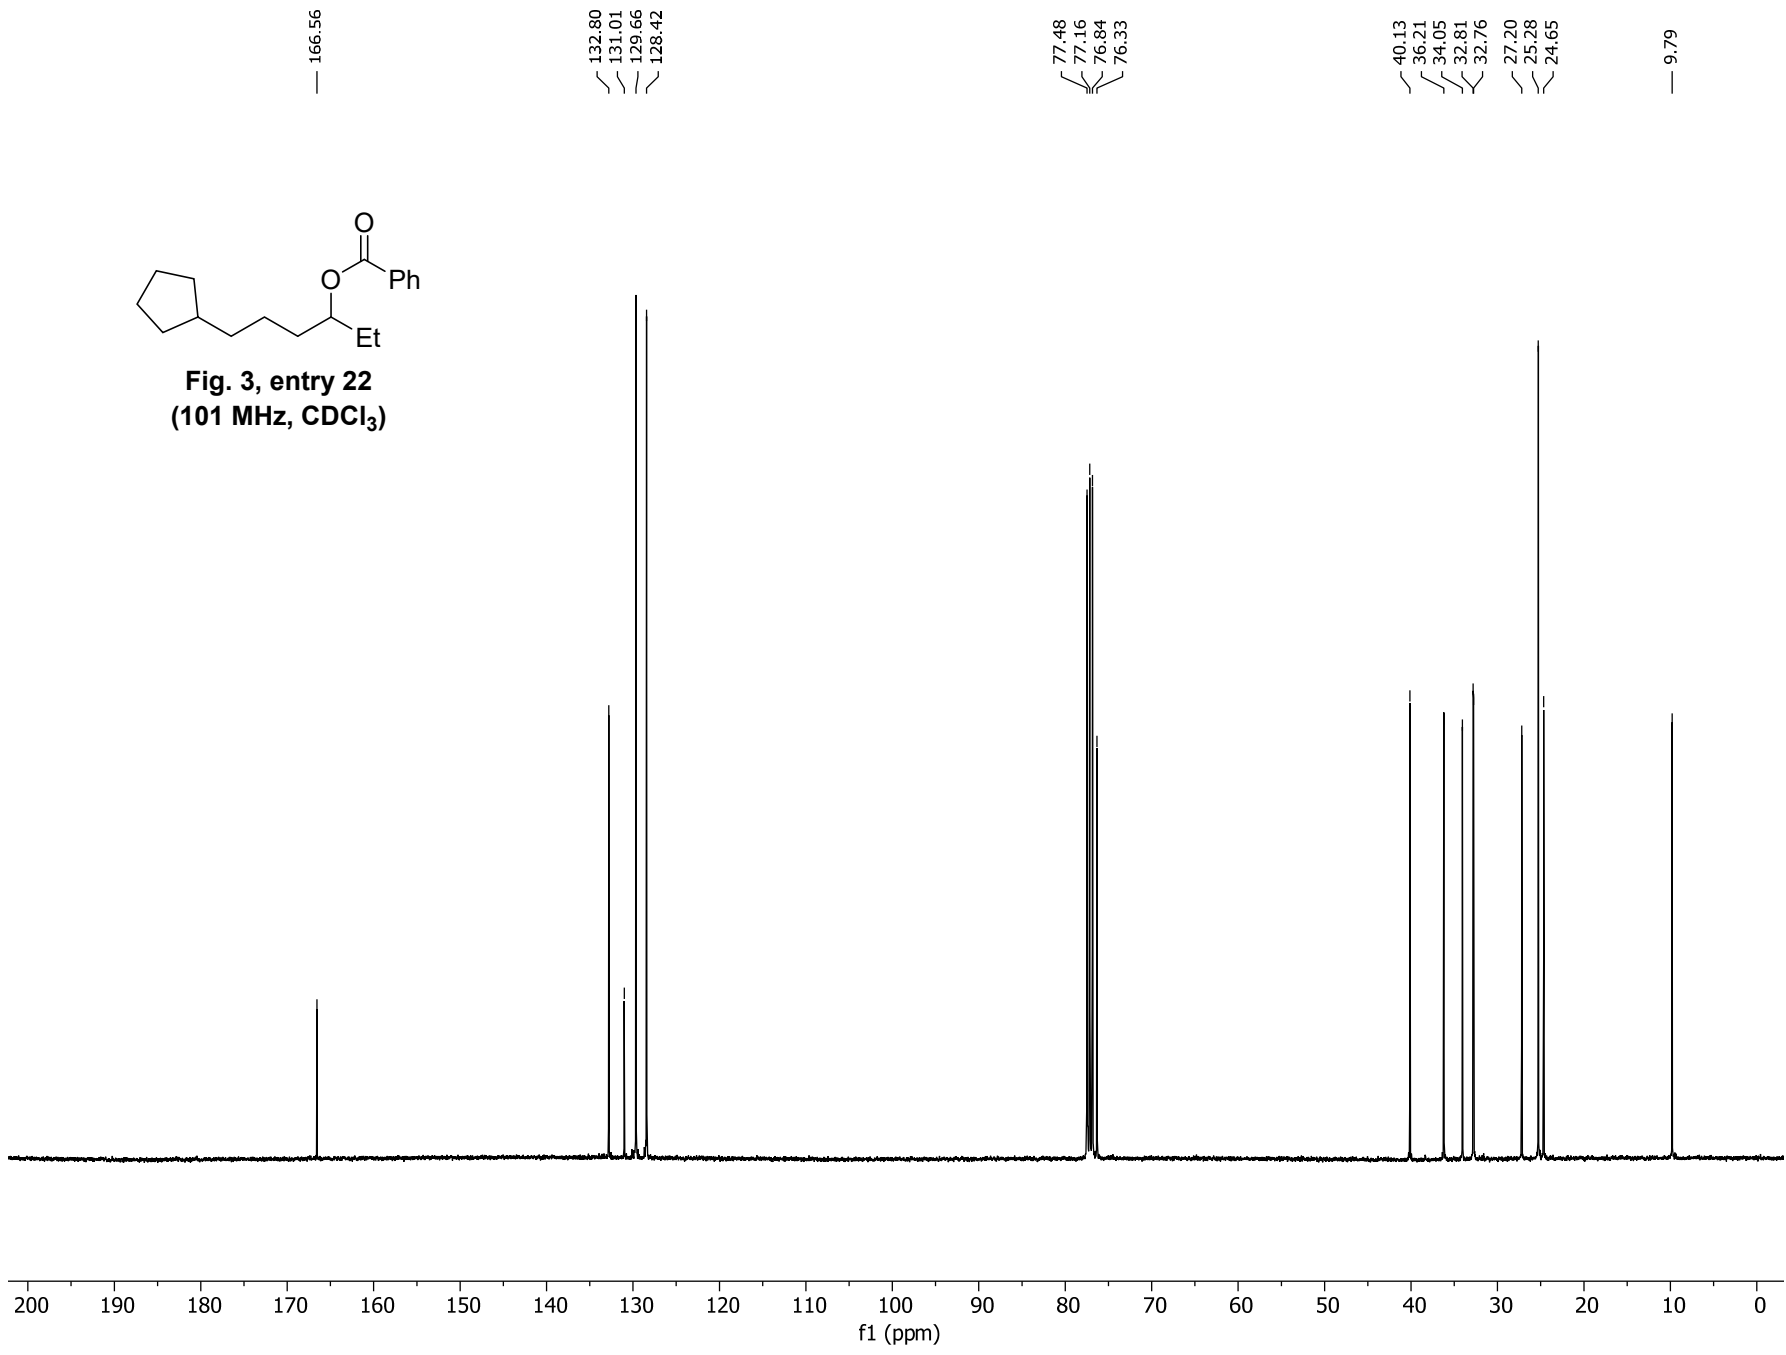

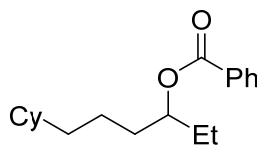

**Fig. 3, entry 23**  
(400 MHz, CDCl<sub>3</sub>)

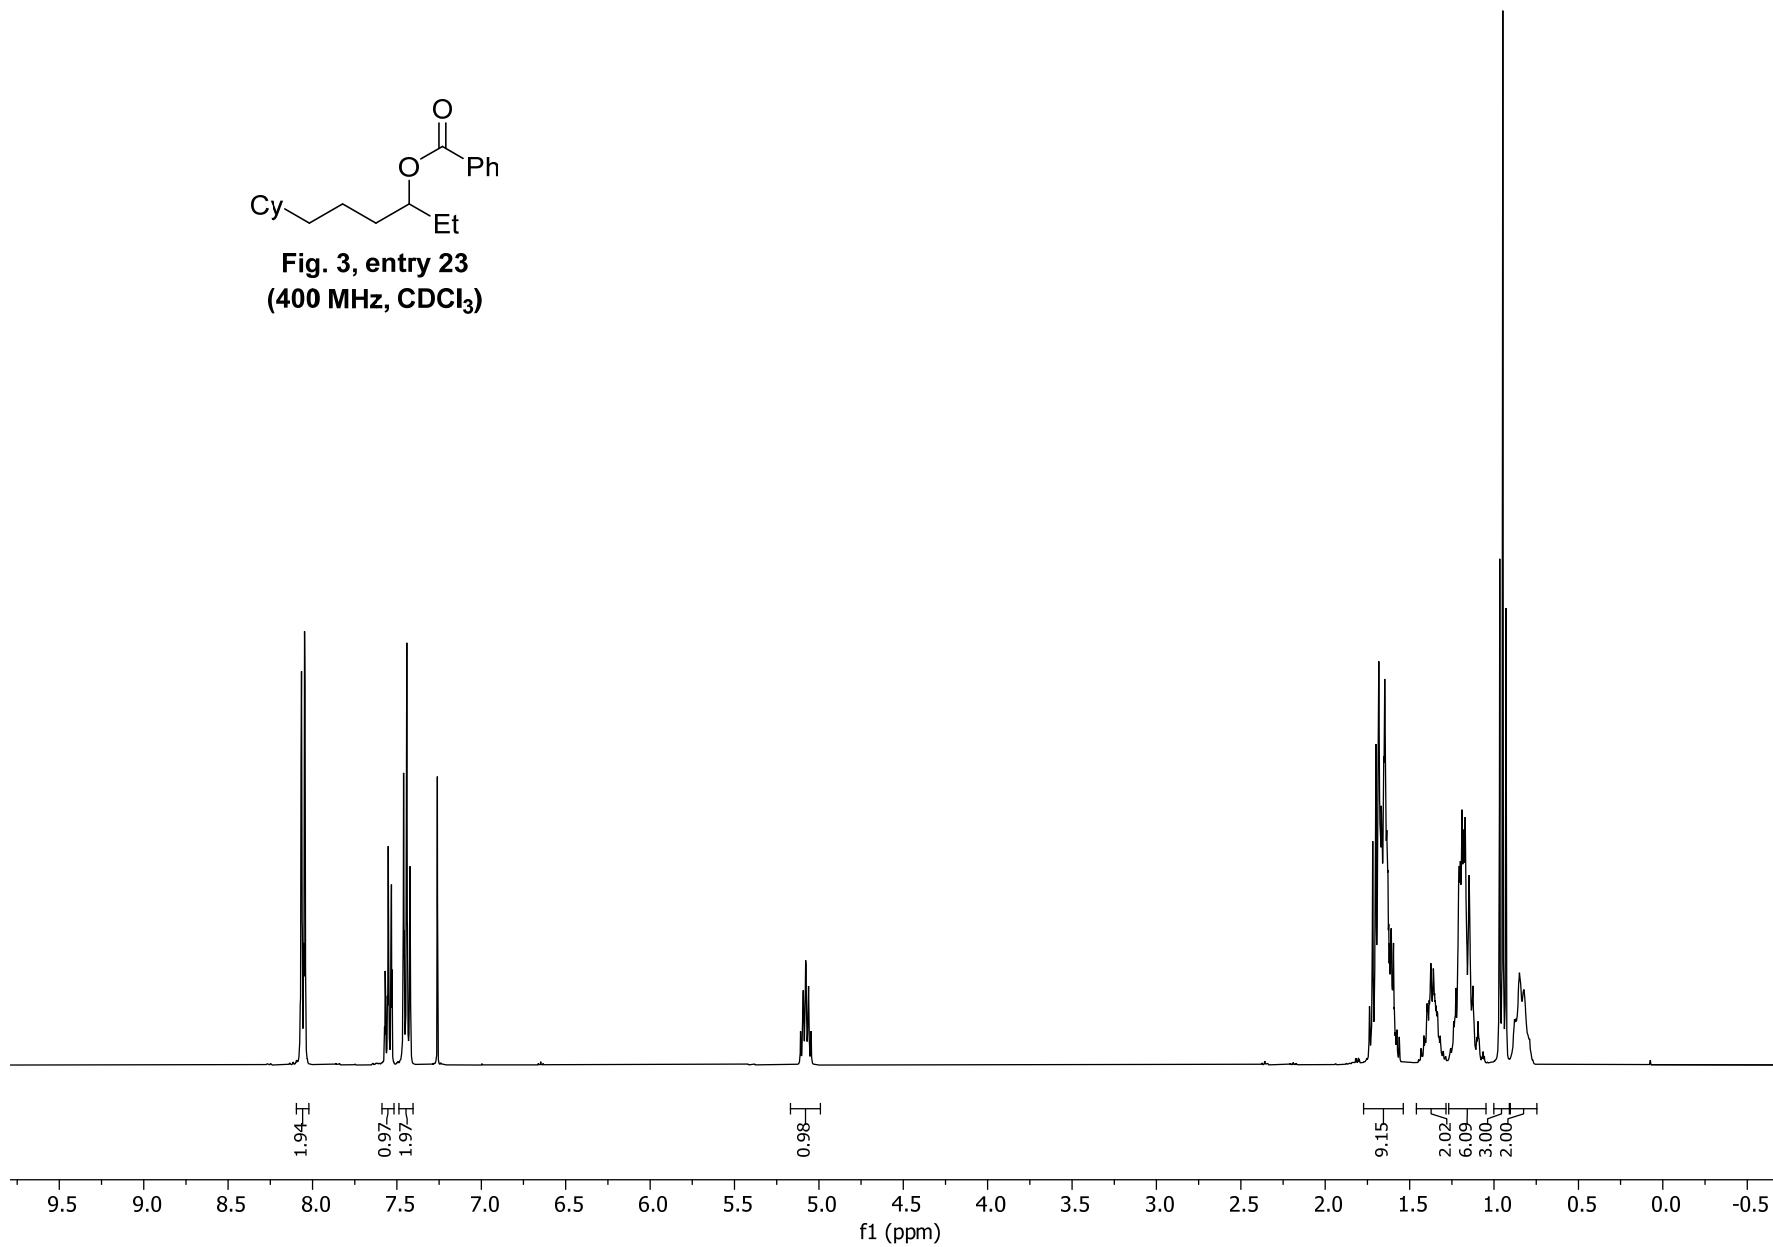

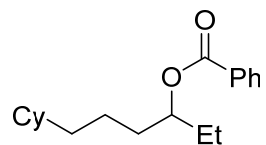

**Fig. 3, entry 23**  
**(101 MHz, CDCl<sub>3</sub>)**

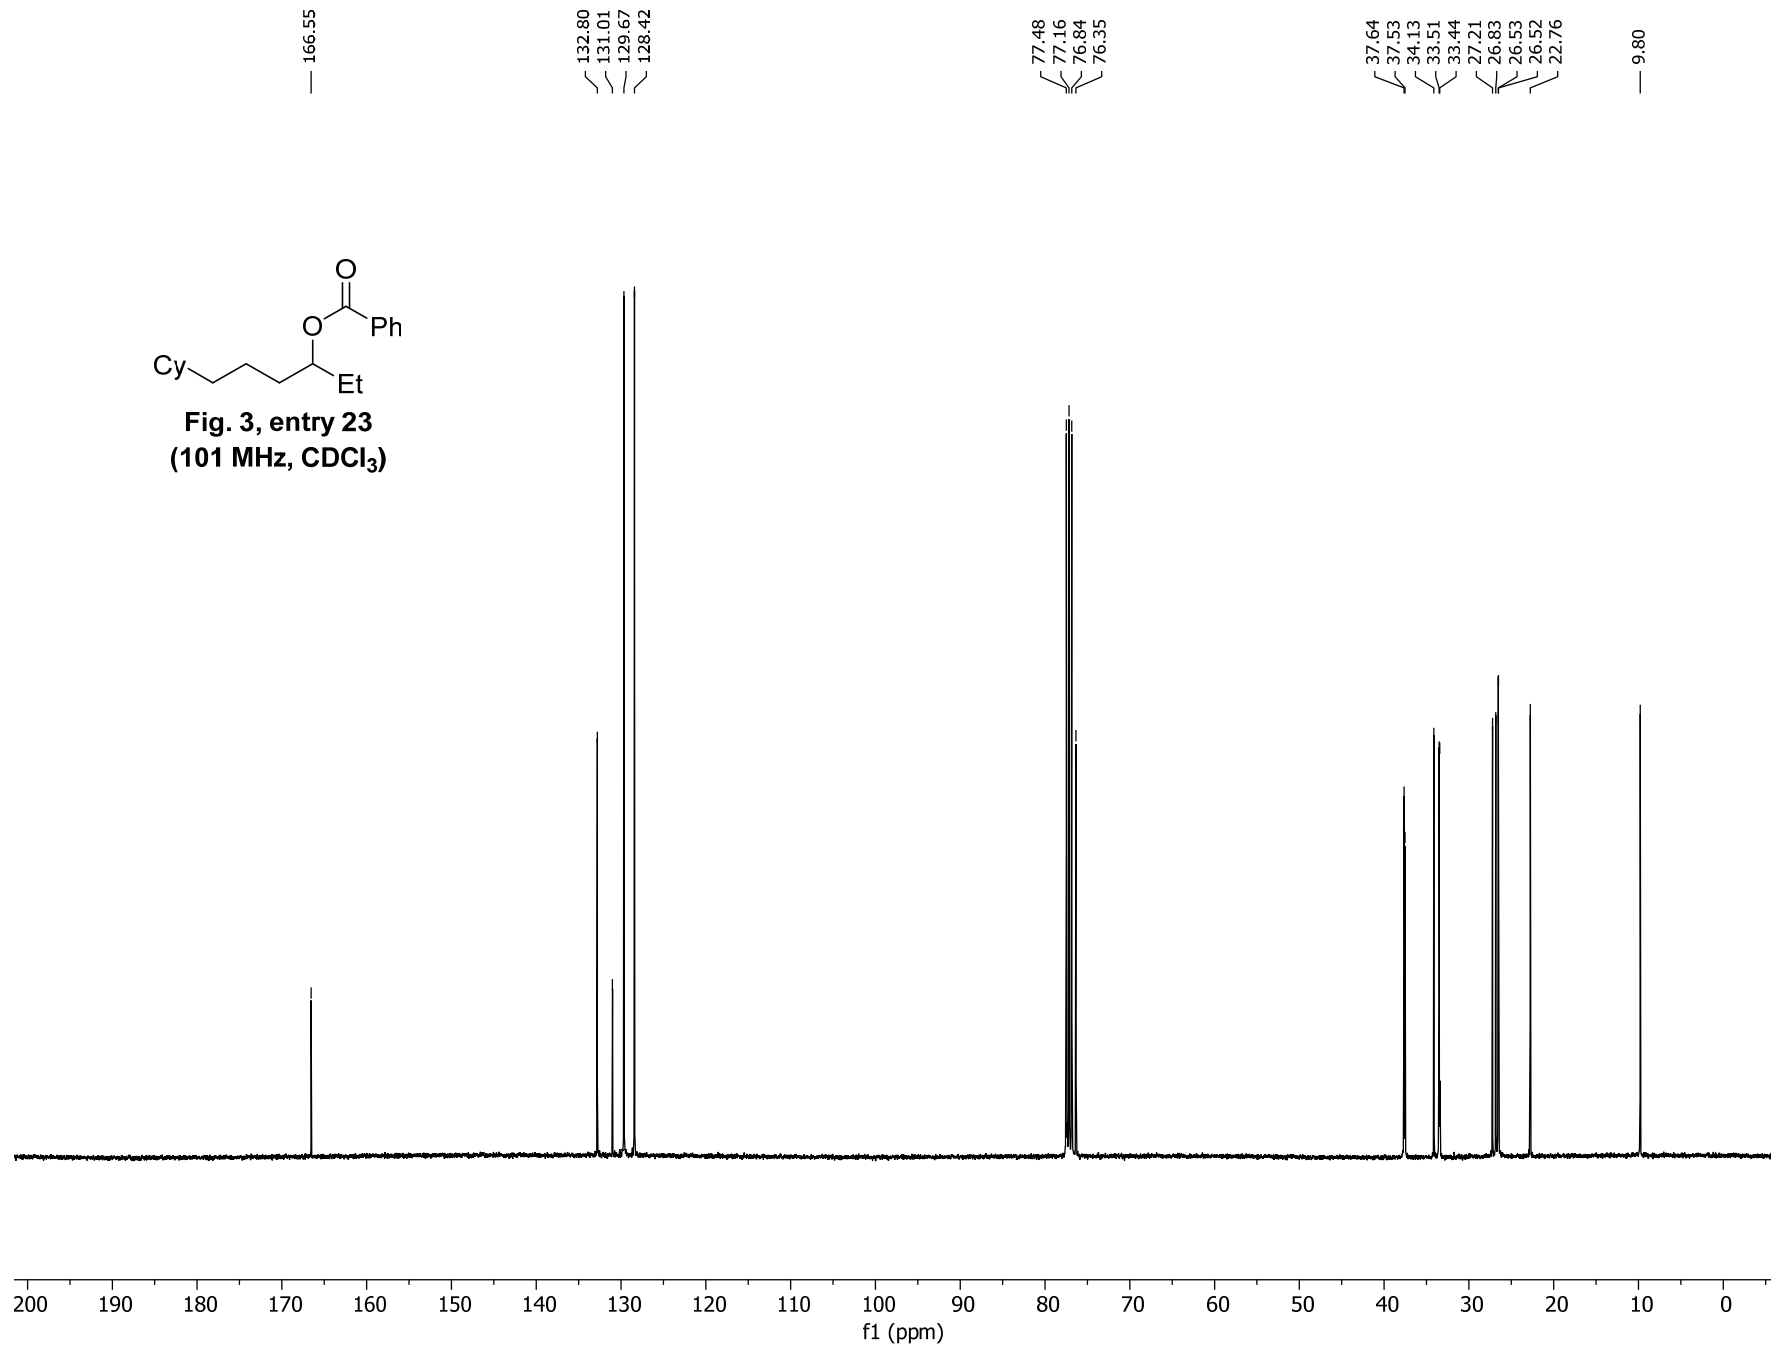



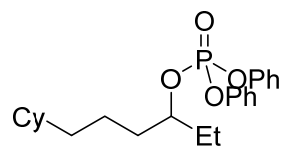

(400 MHz, CDCl<sub>3</sub>)

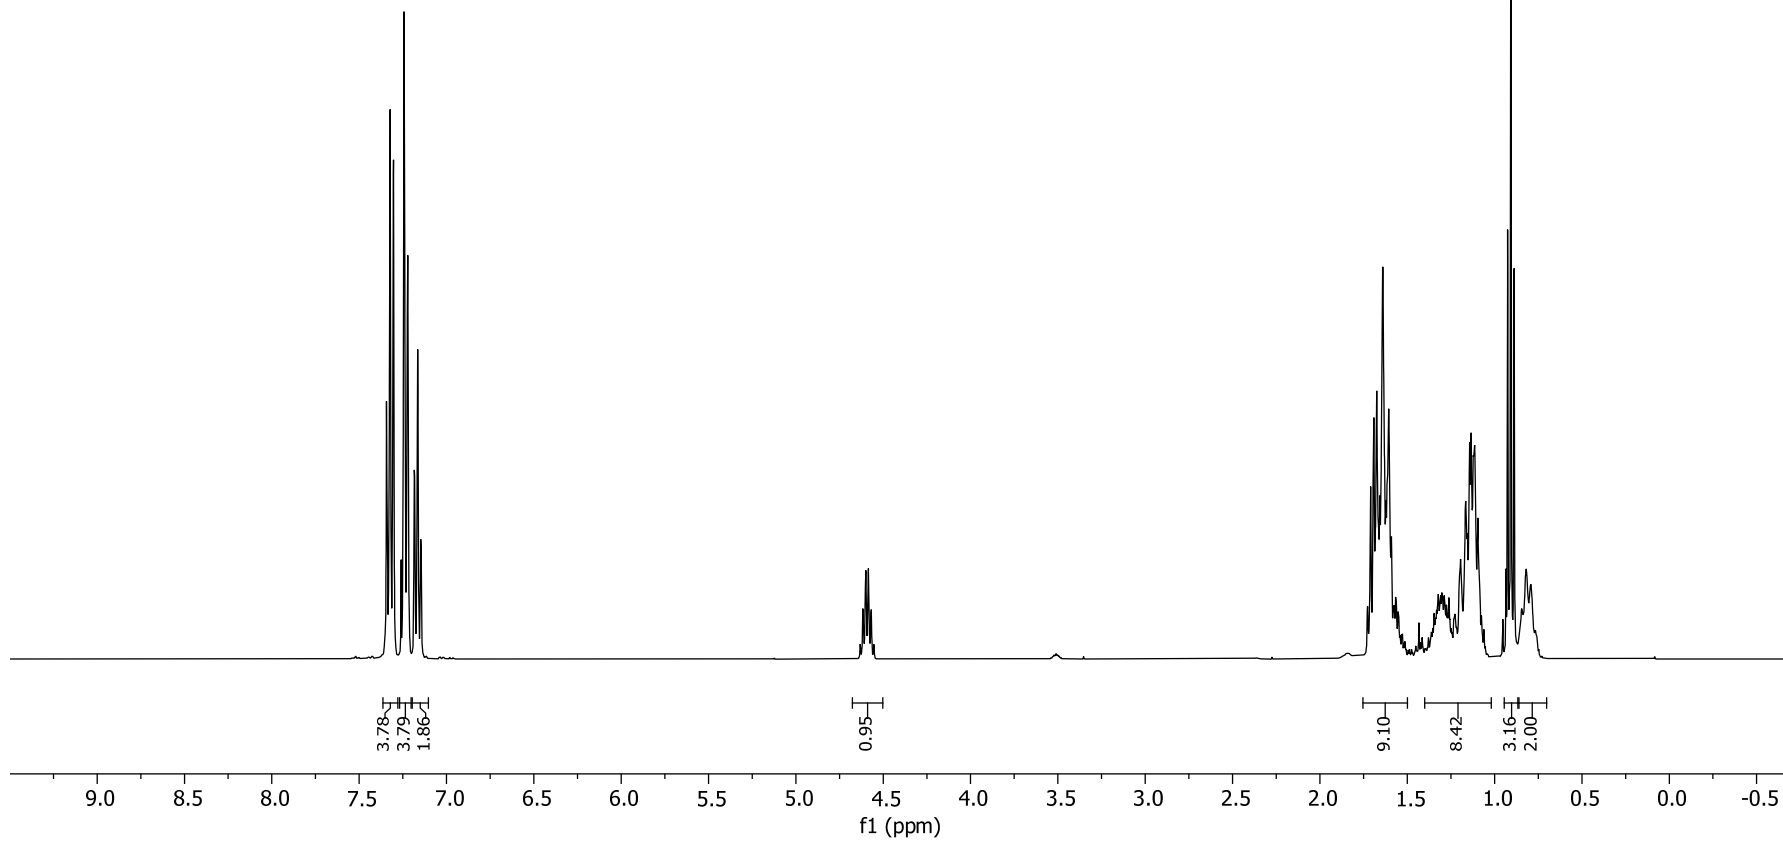

S-129

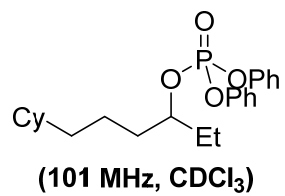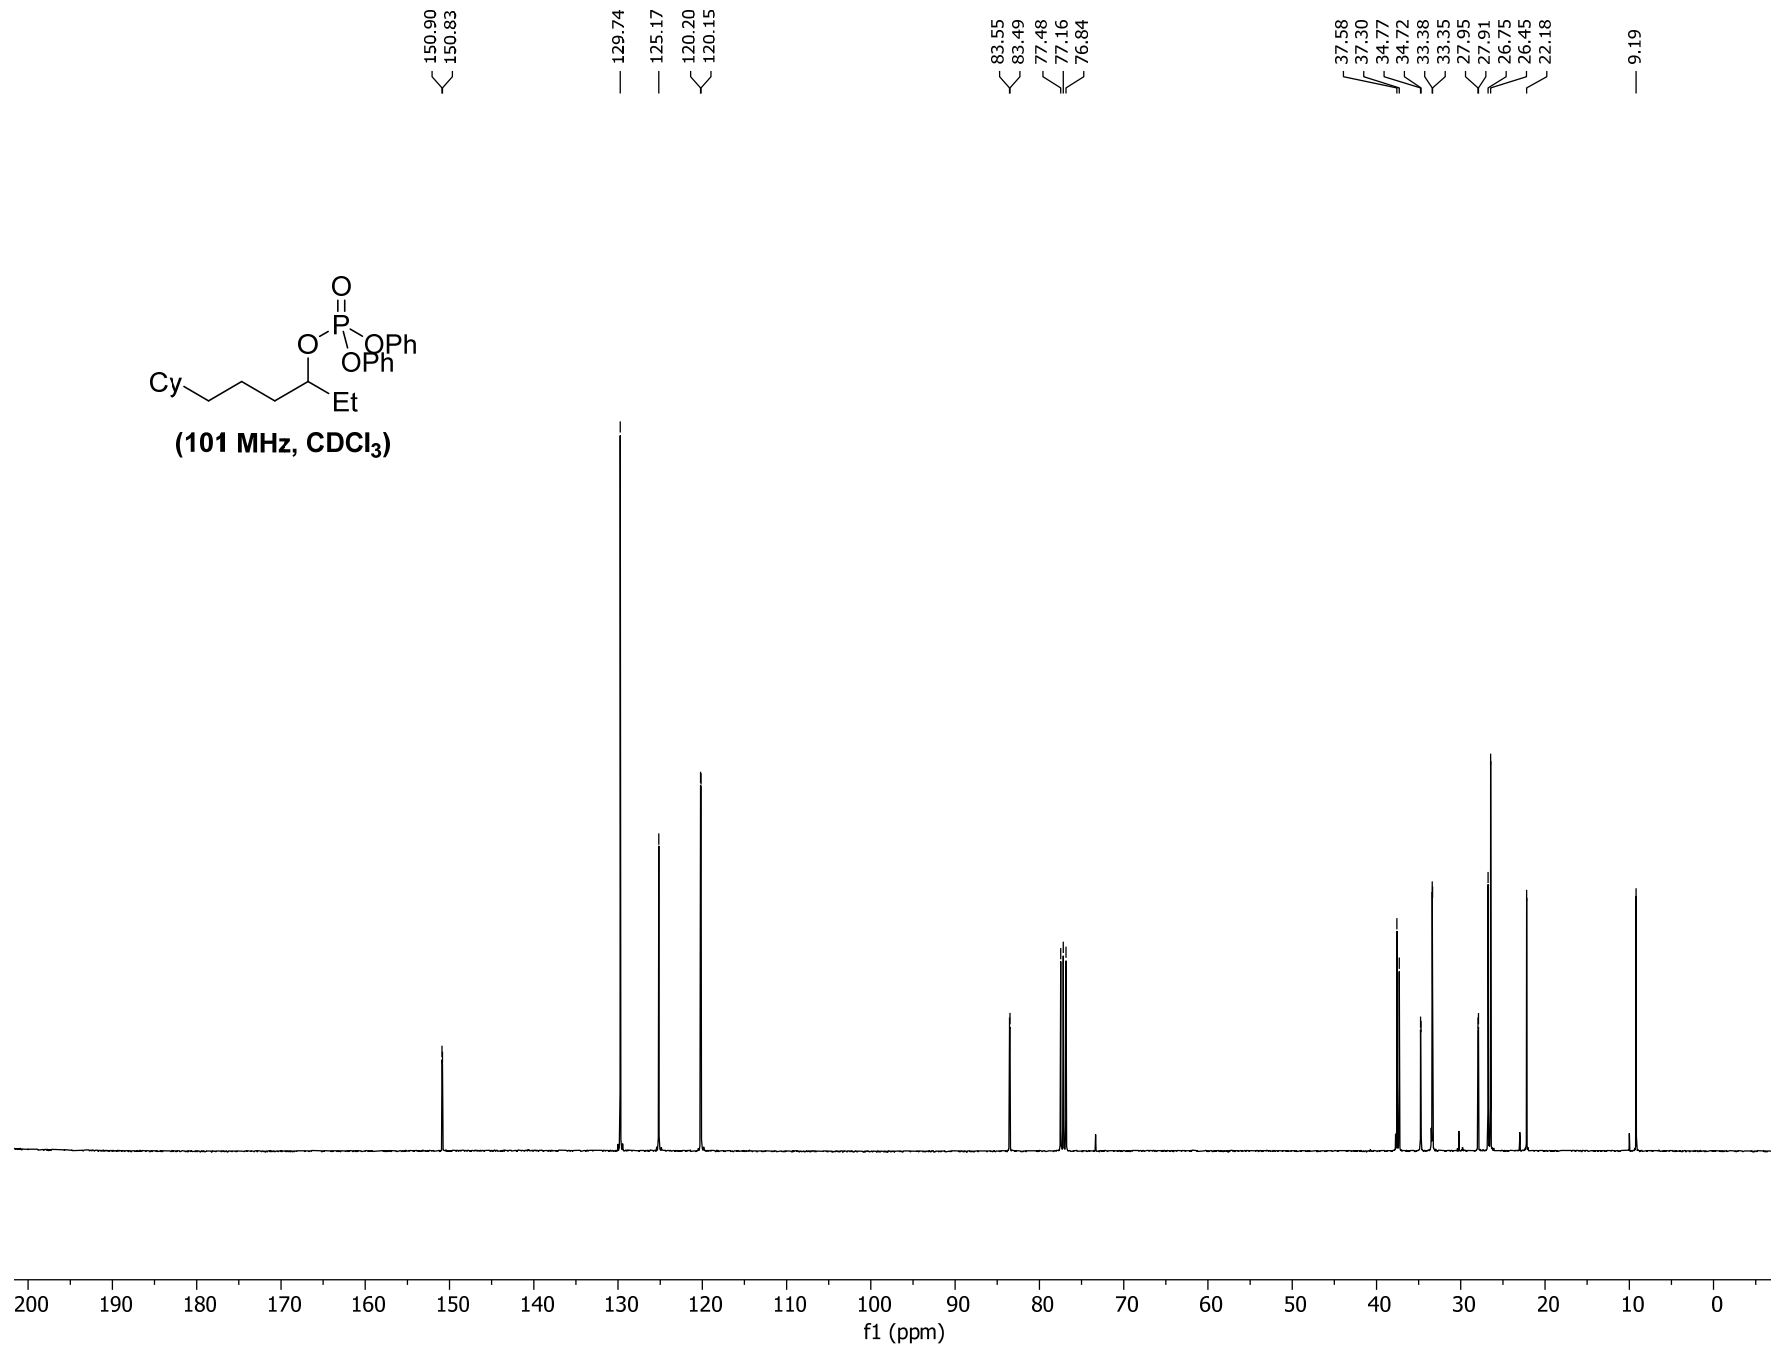

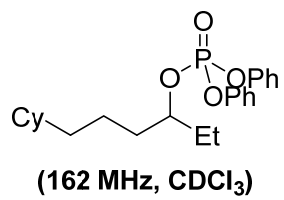

— -12.34

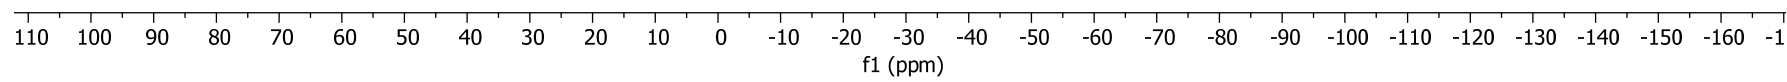

S-131

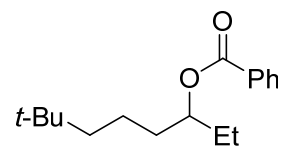

**Fig. 3, entry 24**  
**(400 MHz, CDCl<sub>3</sub>)**

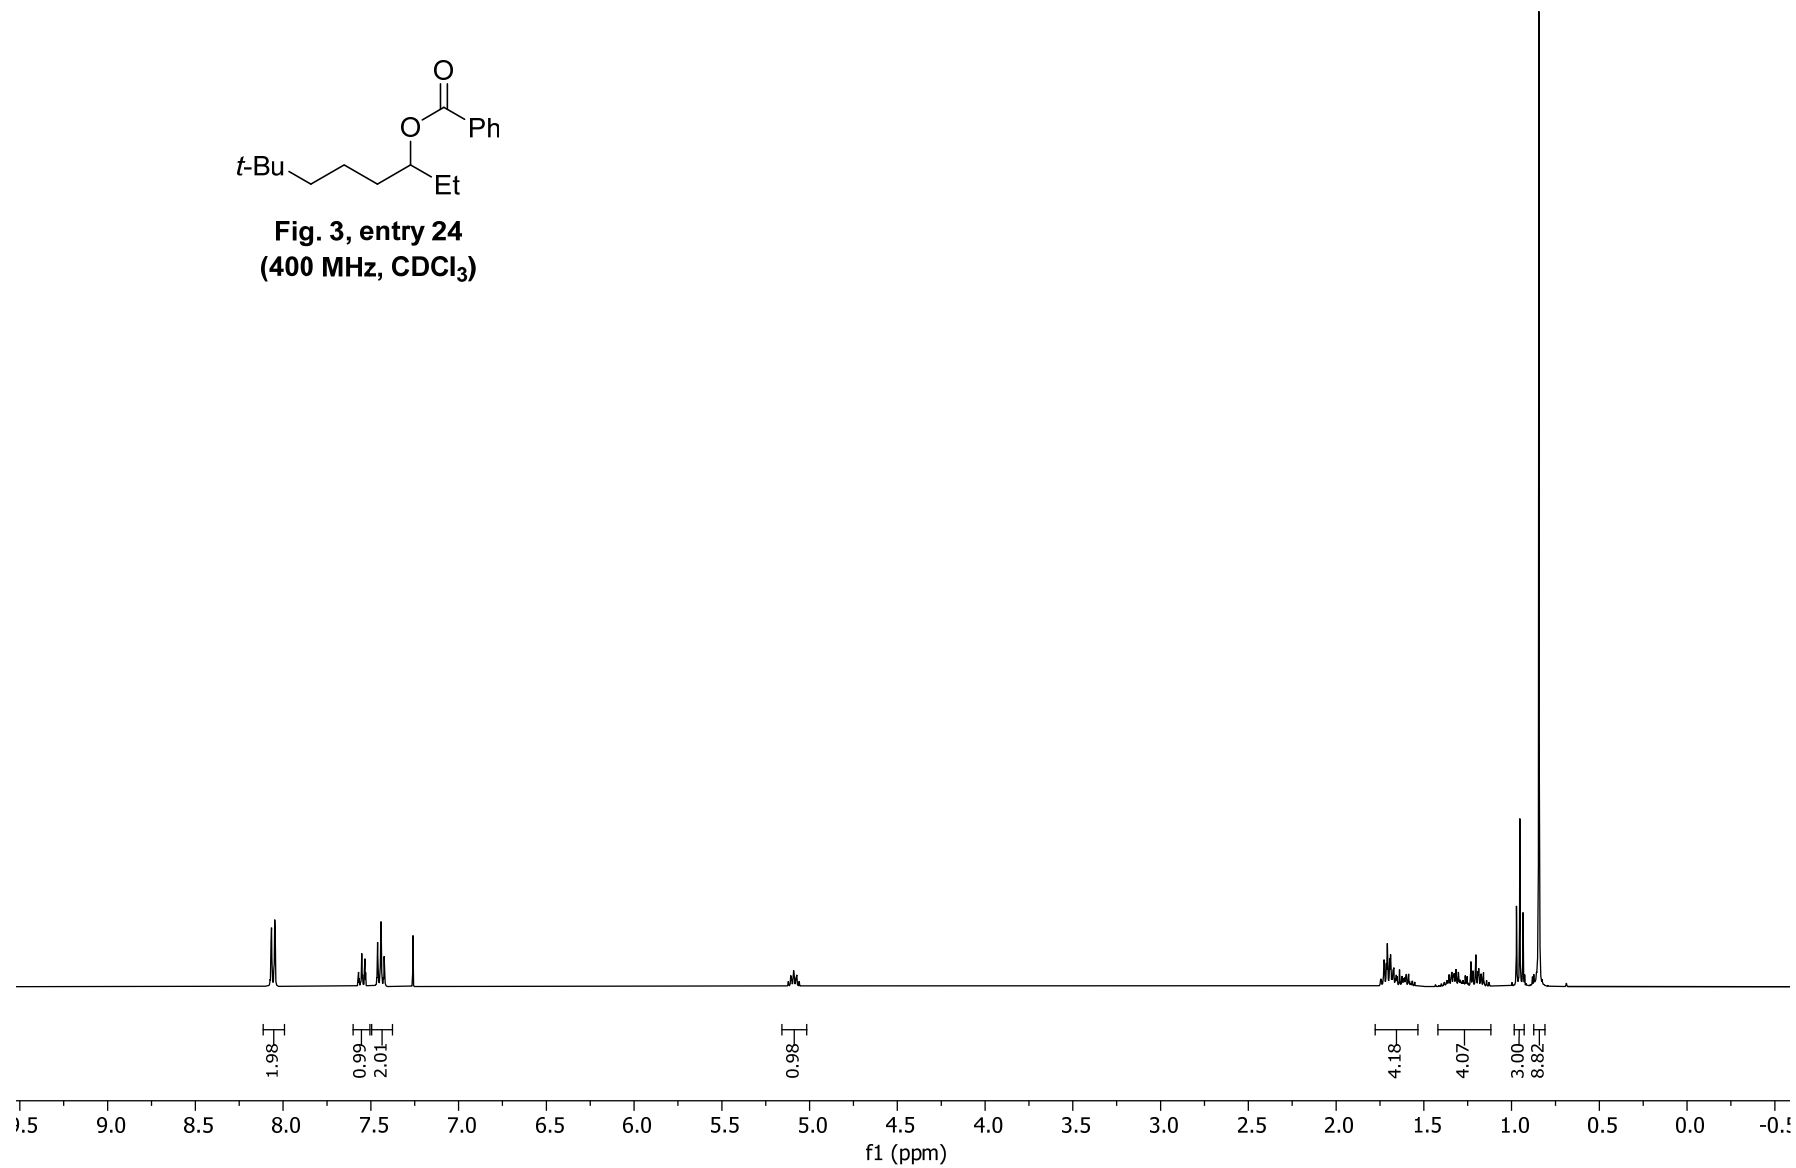

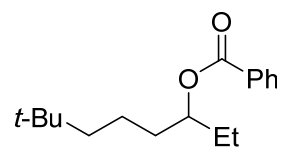

**Fig. 3, entry 24**  
(101 MHz, CDCl<sub>3</sub>)

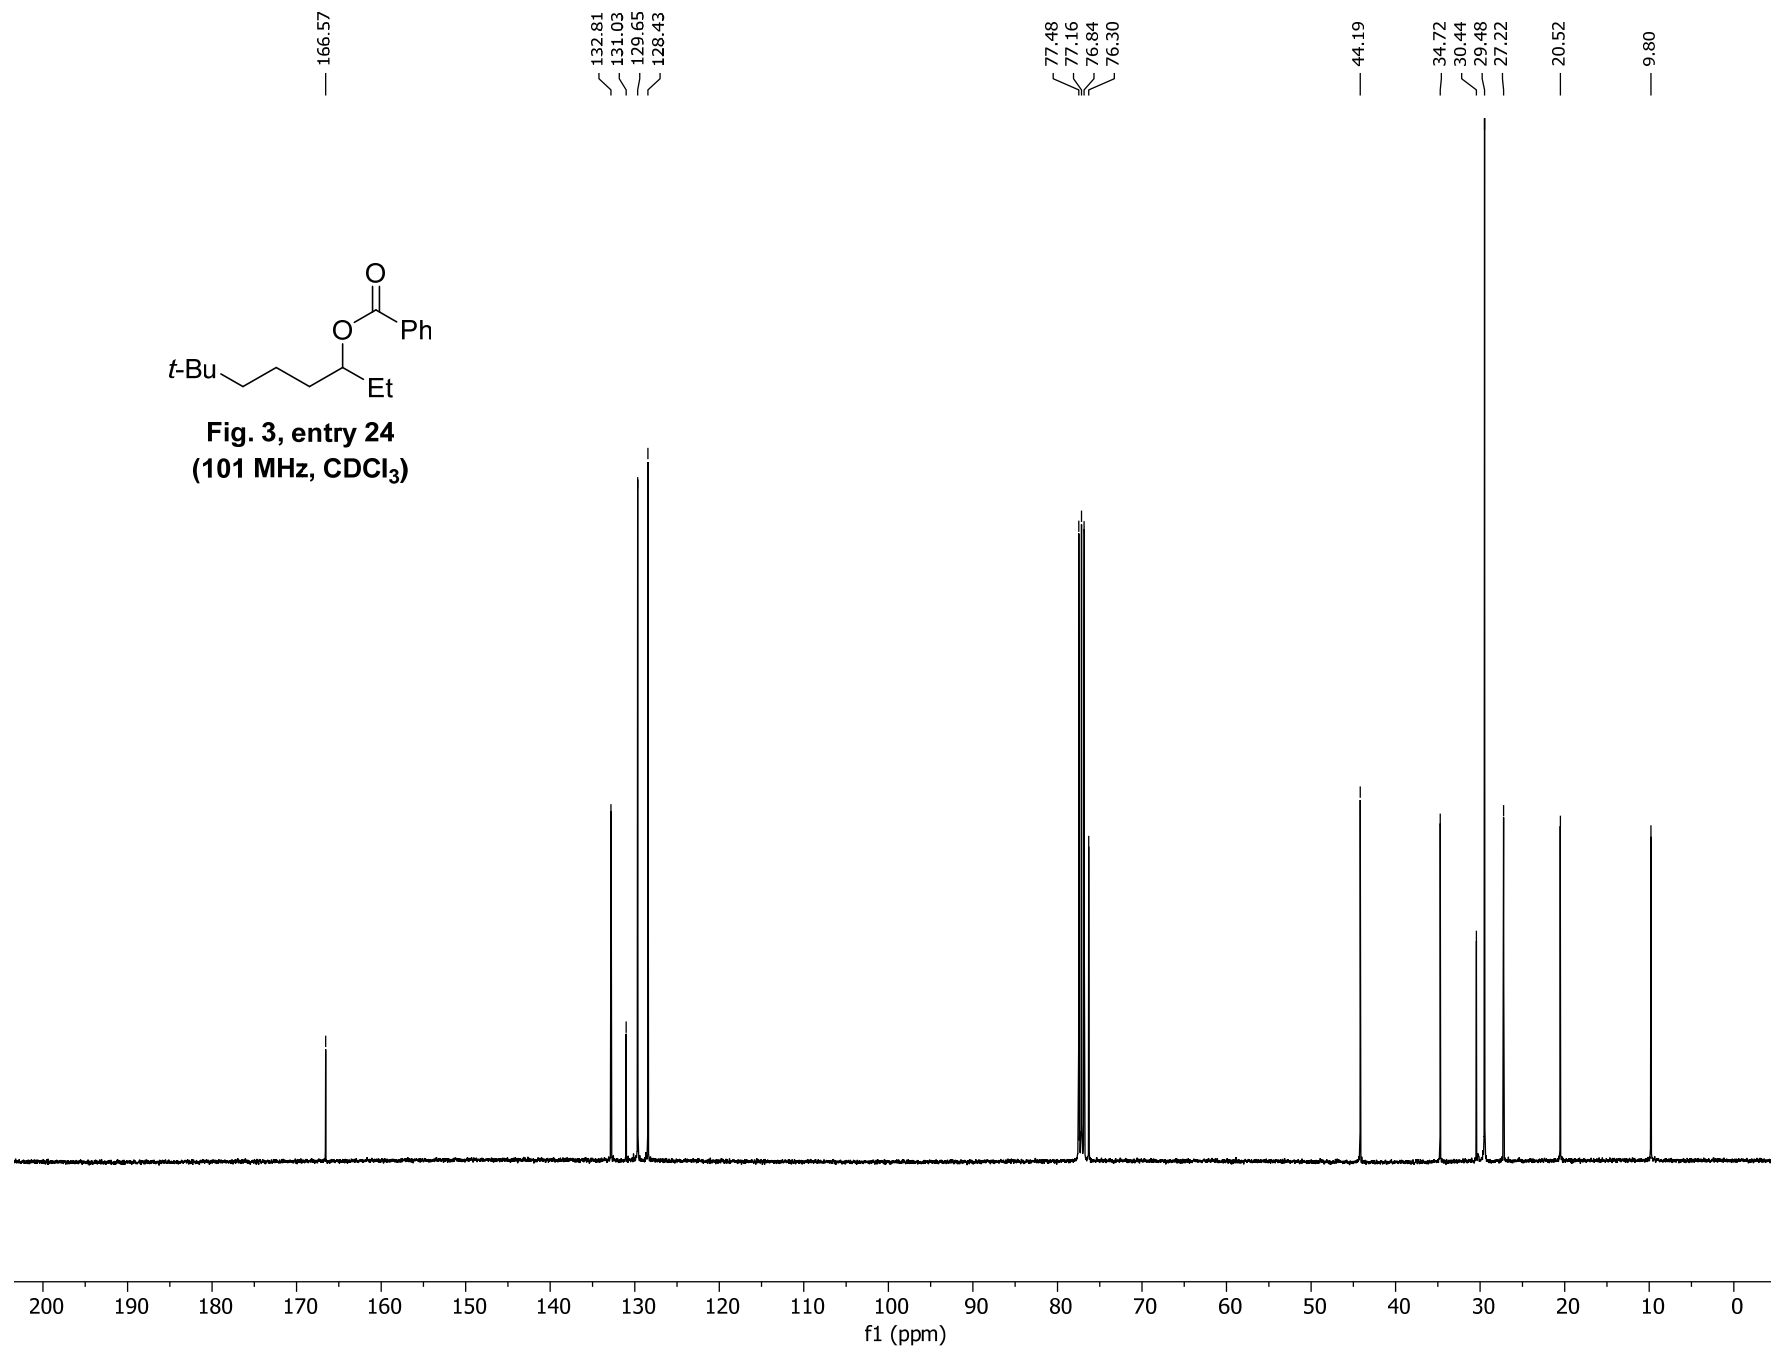

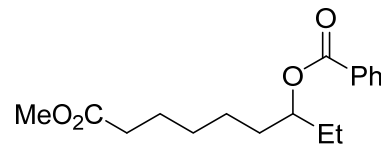

**Fig. 3, entry 25**  
**(400 MHz, CDCl<sub>3</sub>)**

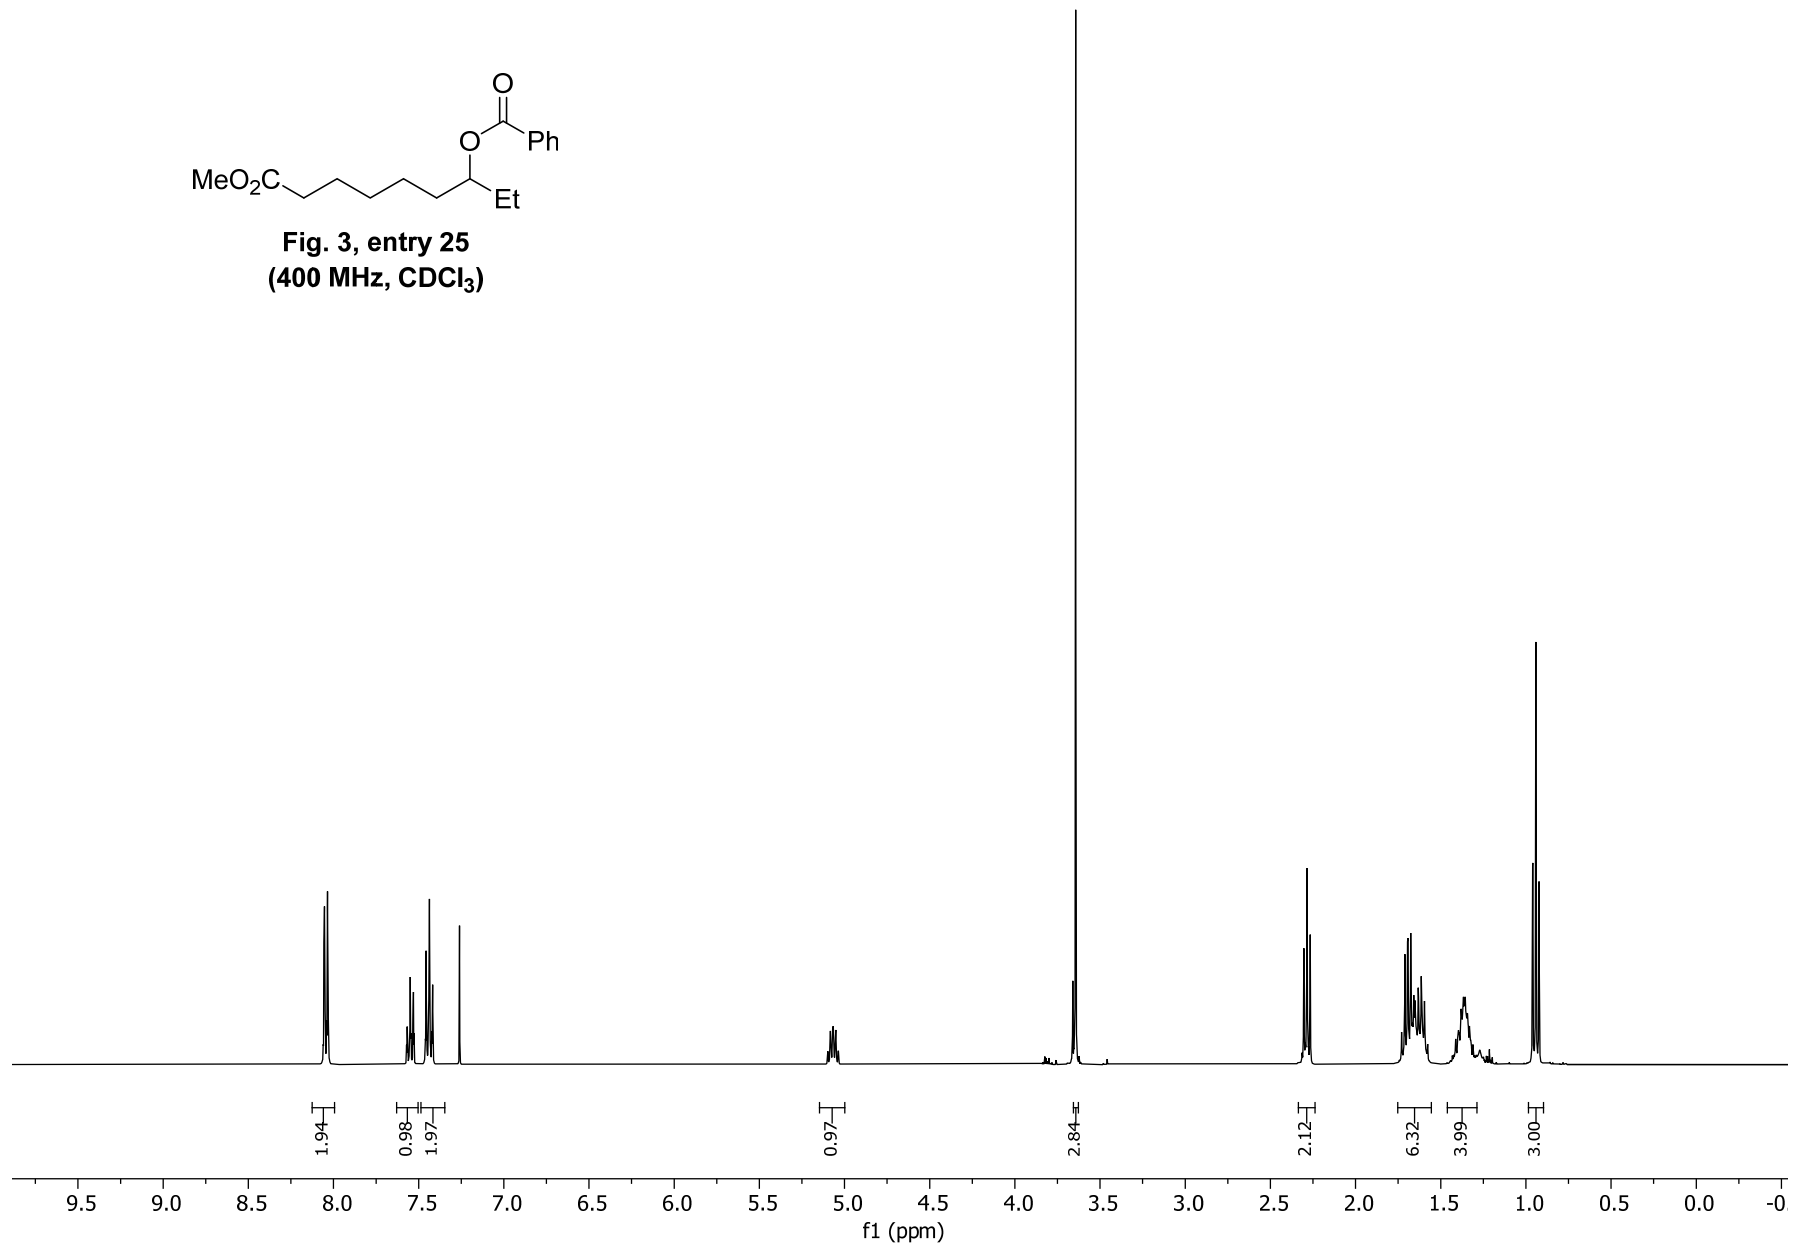

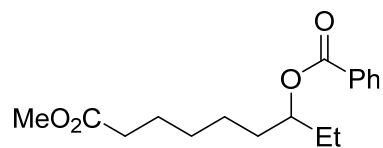

Fig. 3, entry 25  
(101 MHz, CDCl<sub>3</sub>)

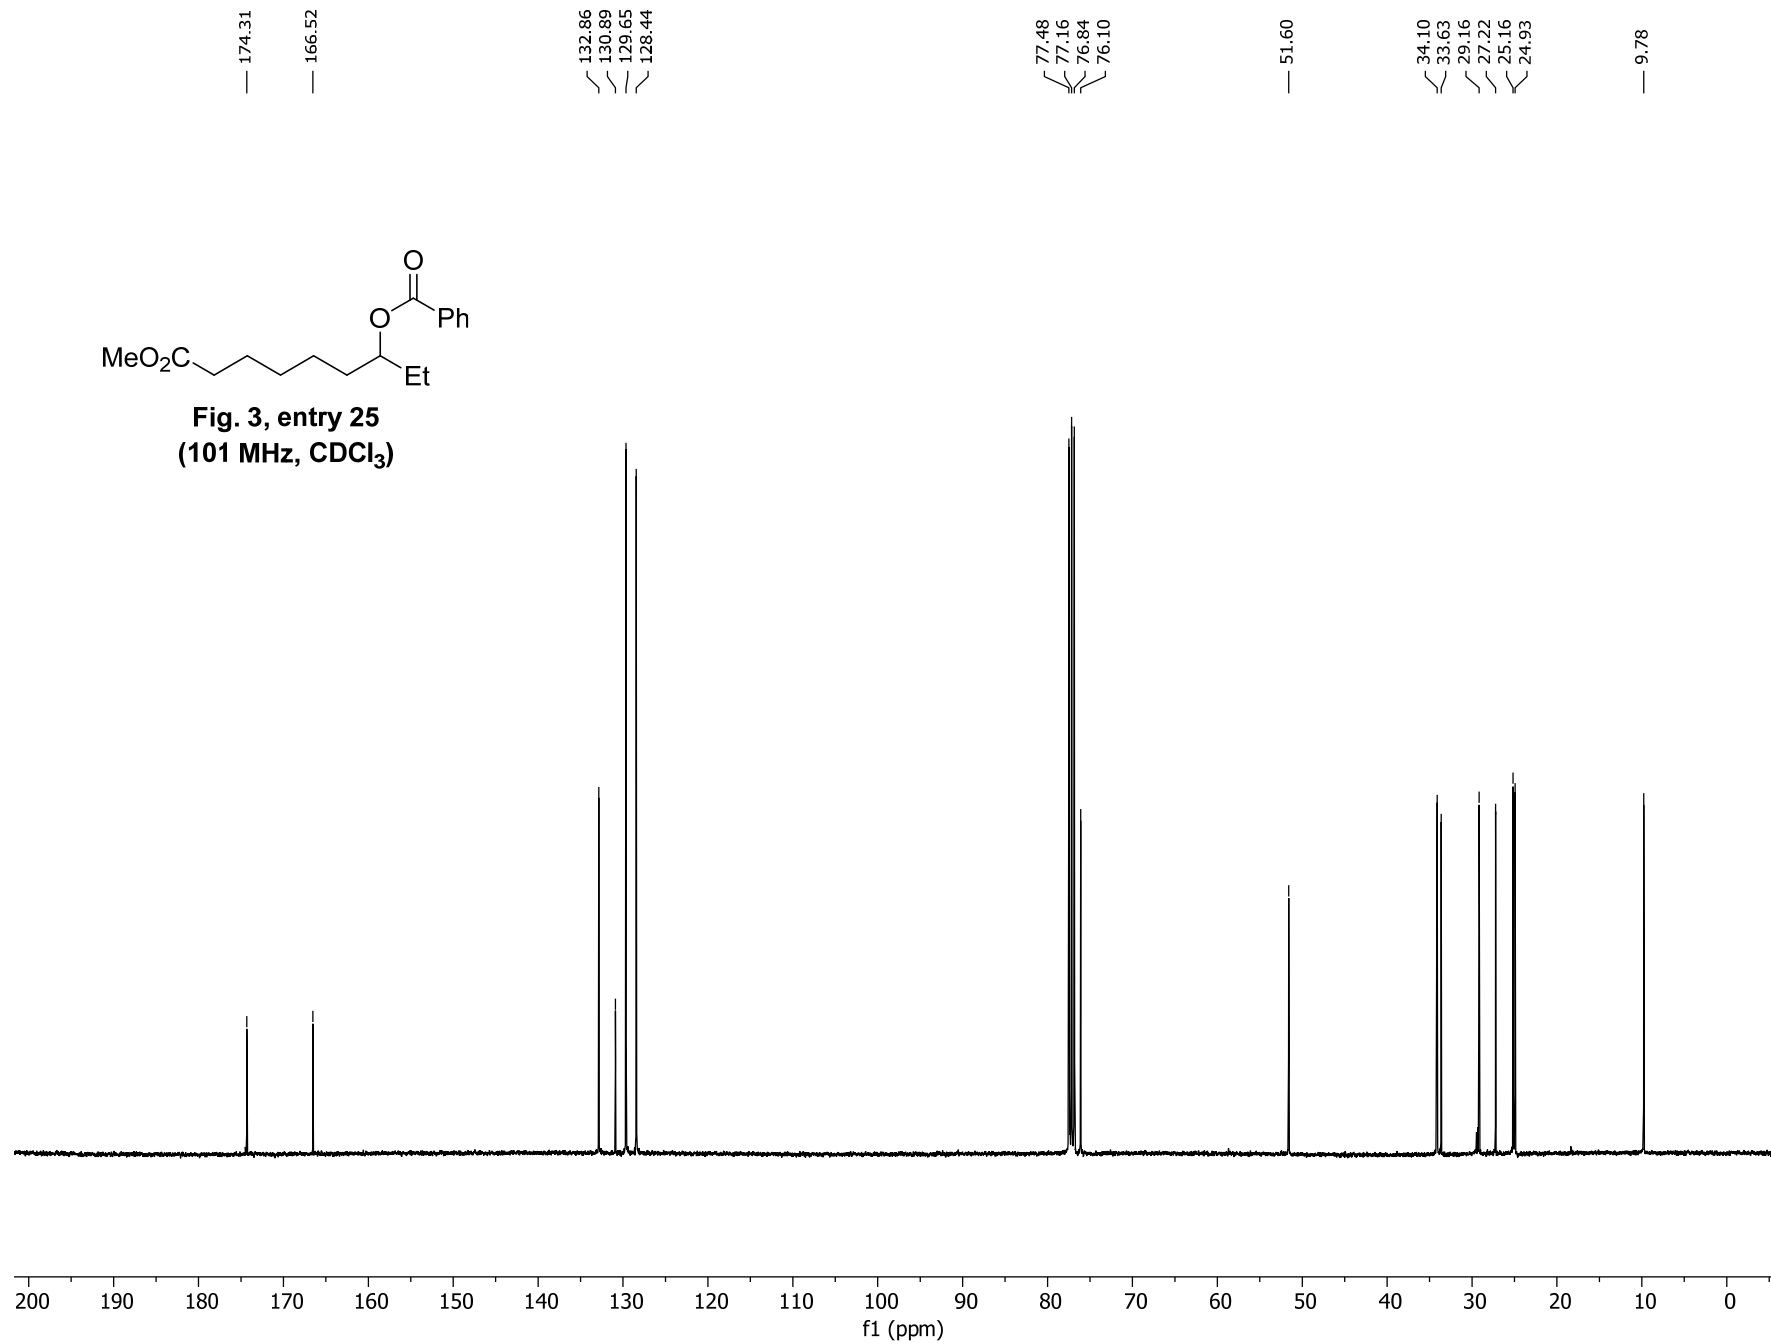

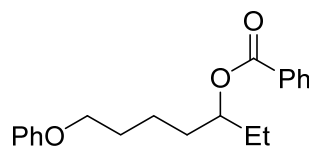

Fig. 3, entry 26  
(400 MHz, CDCl<sub>3</sub>)

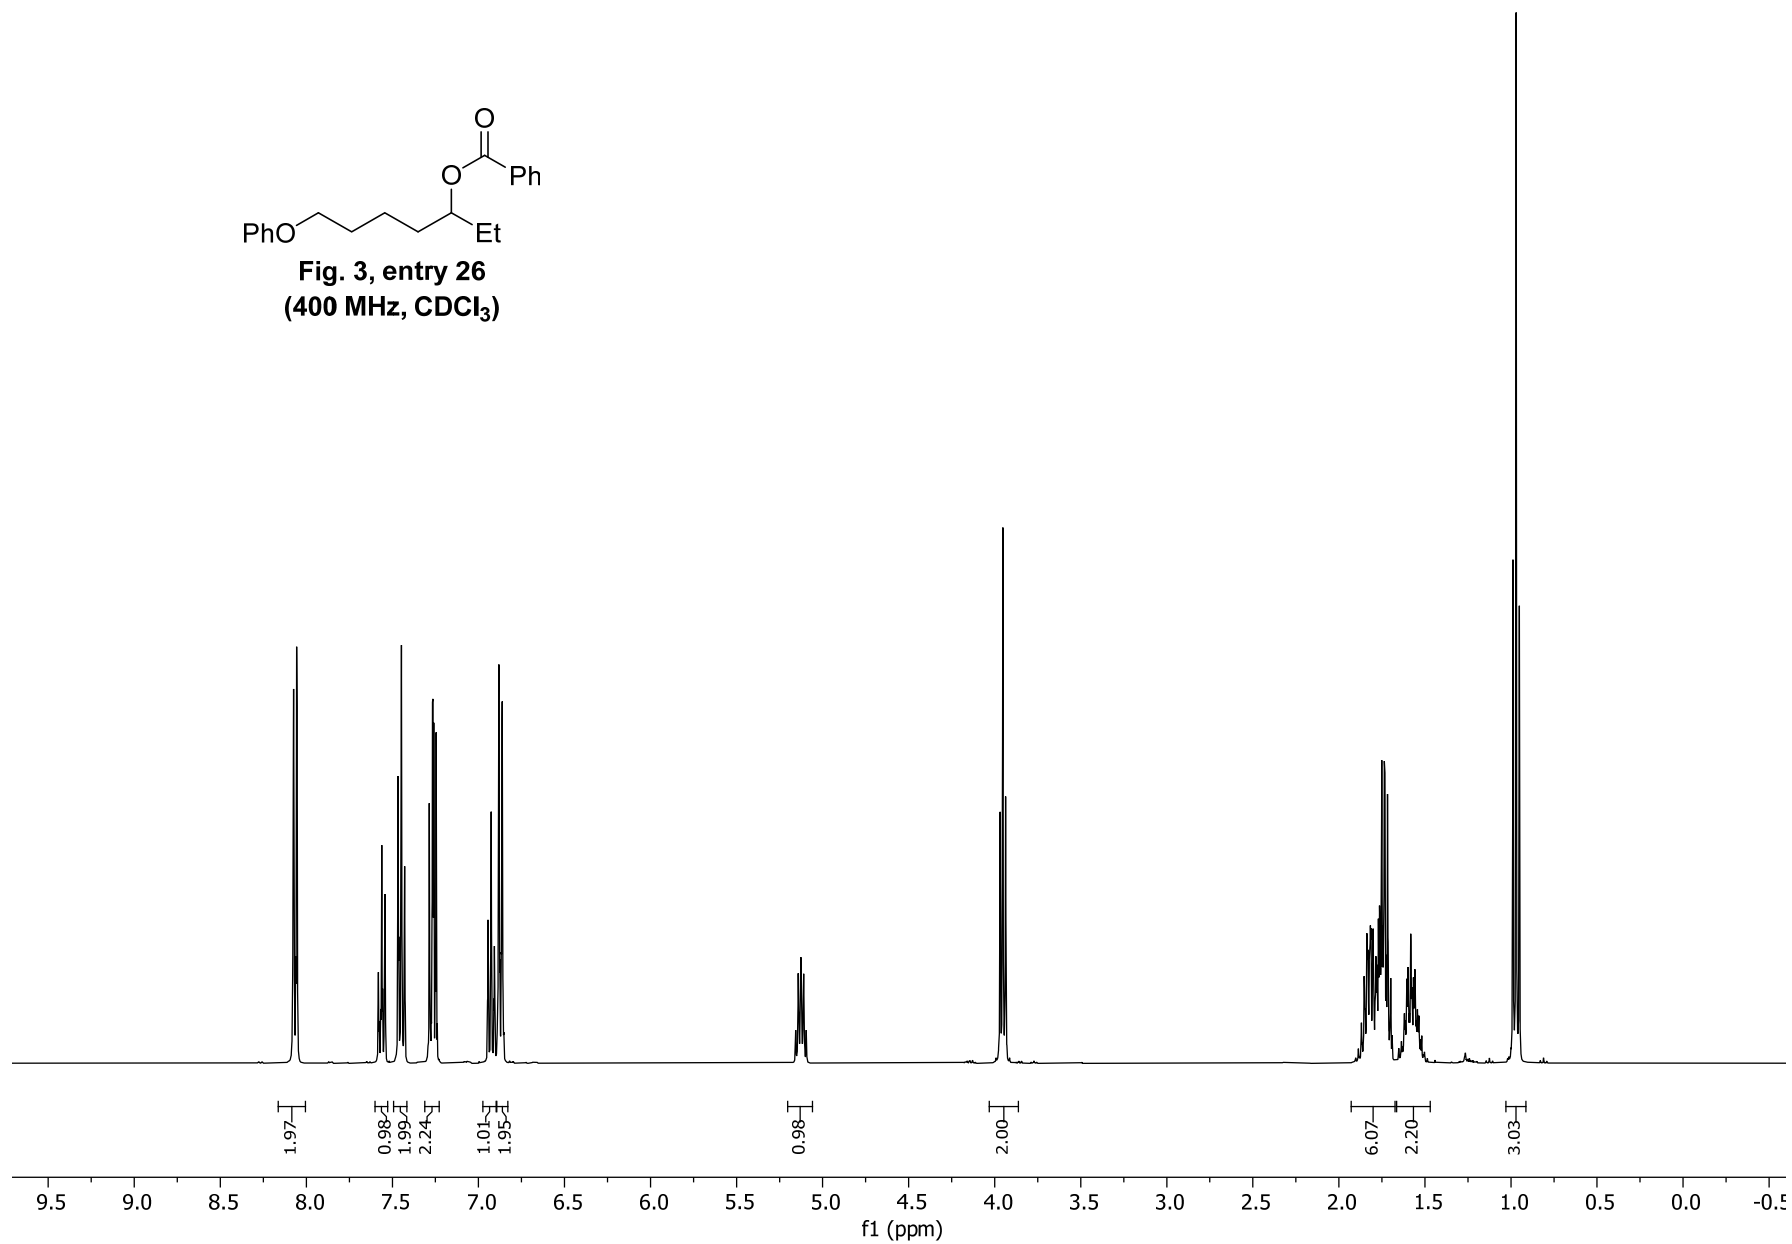



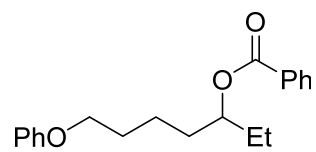

Fig. 3, entry 26  
(101 MHz, CDCl<sub>3</sub>)

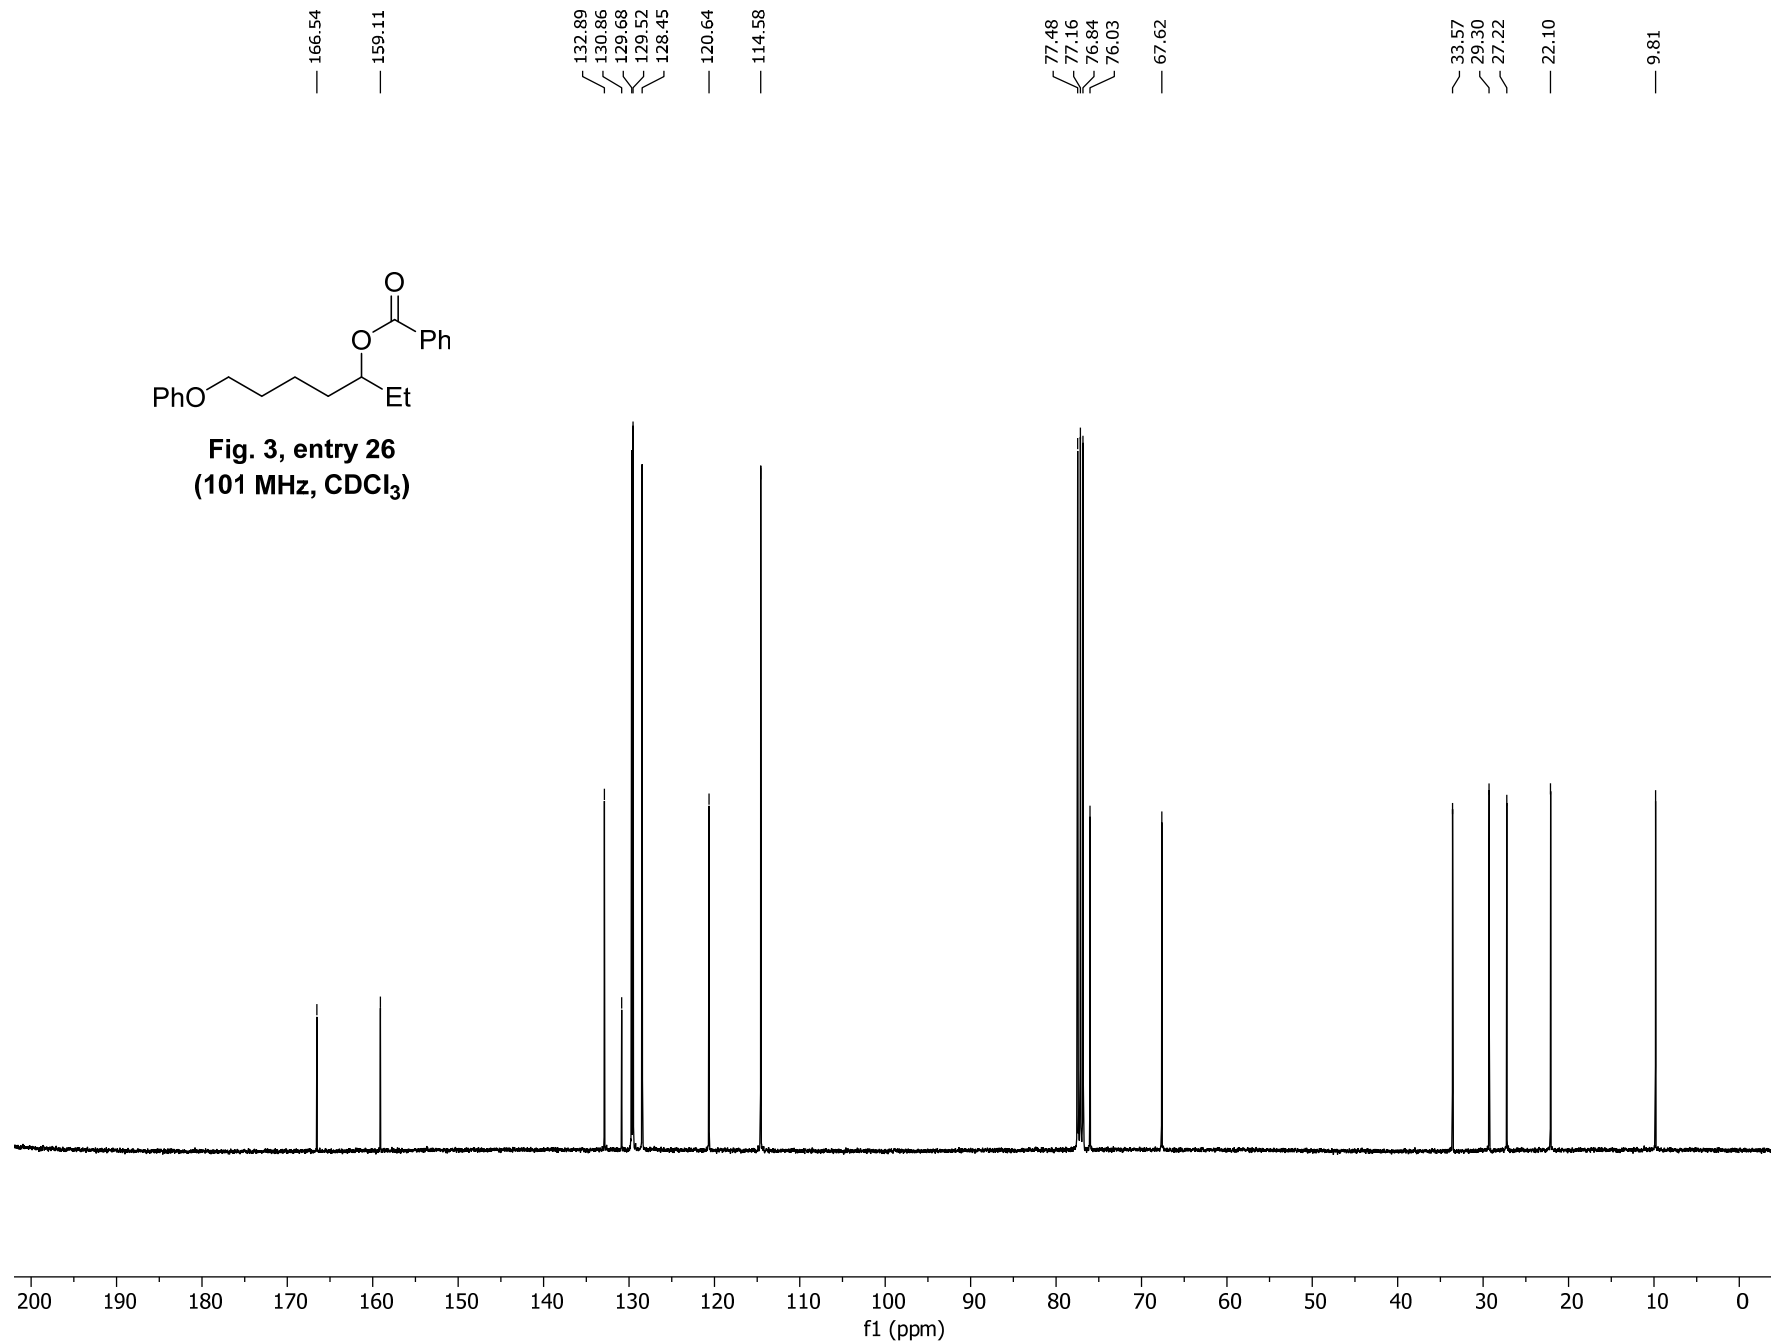

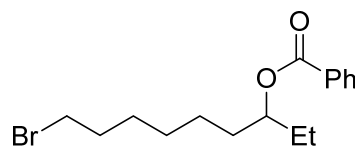

**Fig. 3, entry 27**  
**(400 MHz, CDCl<sub>3</sub>)**

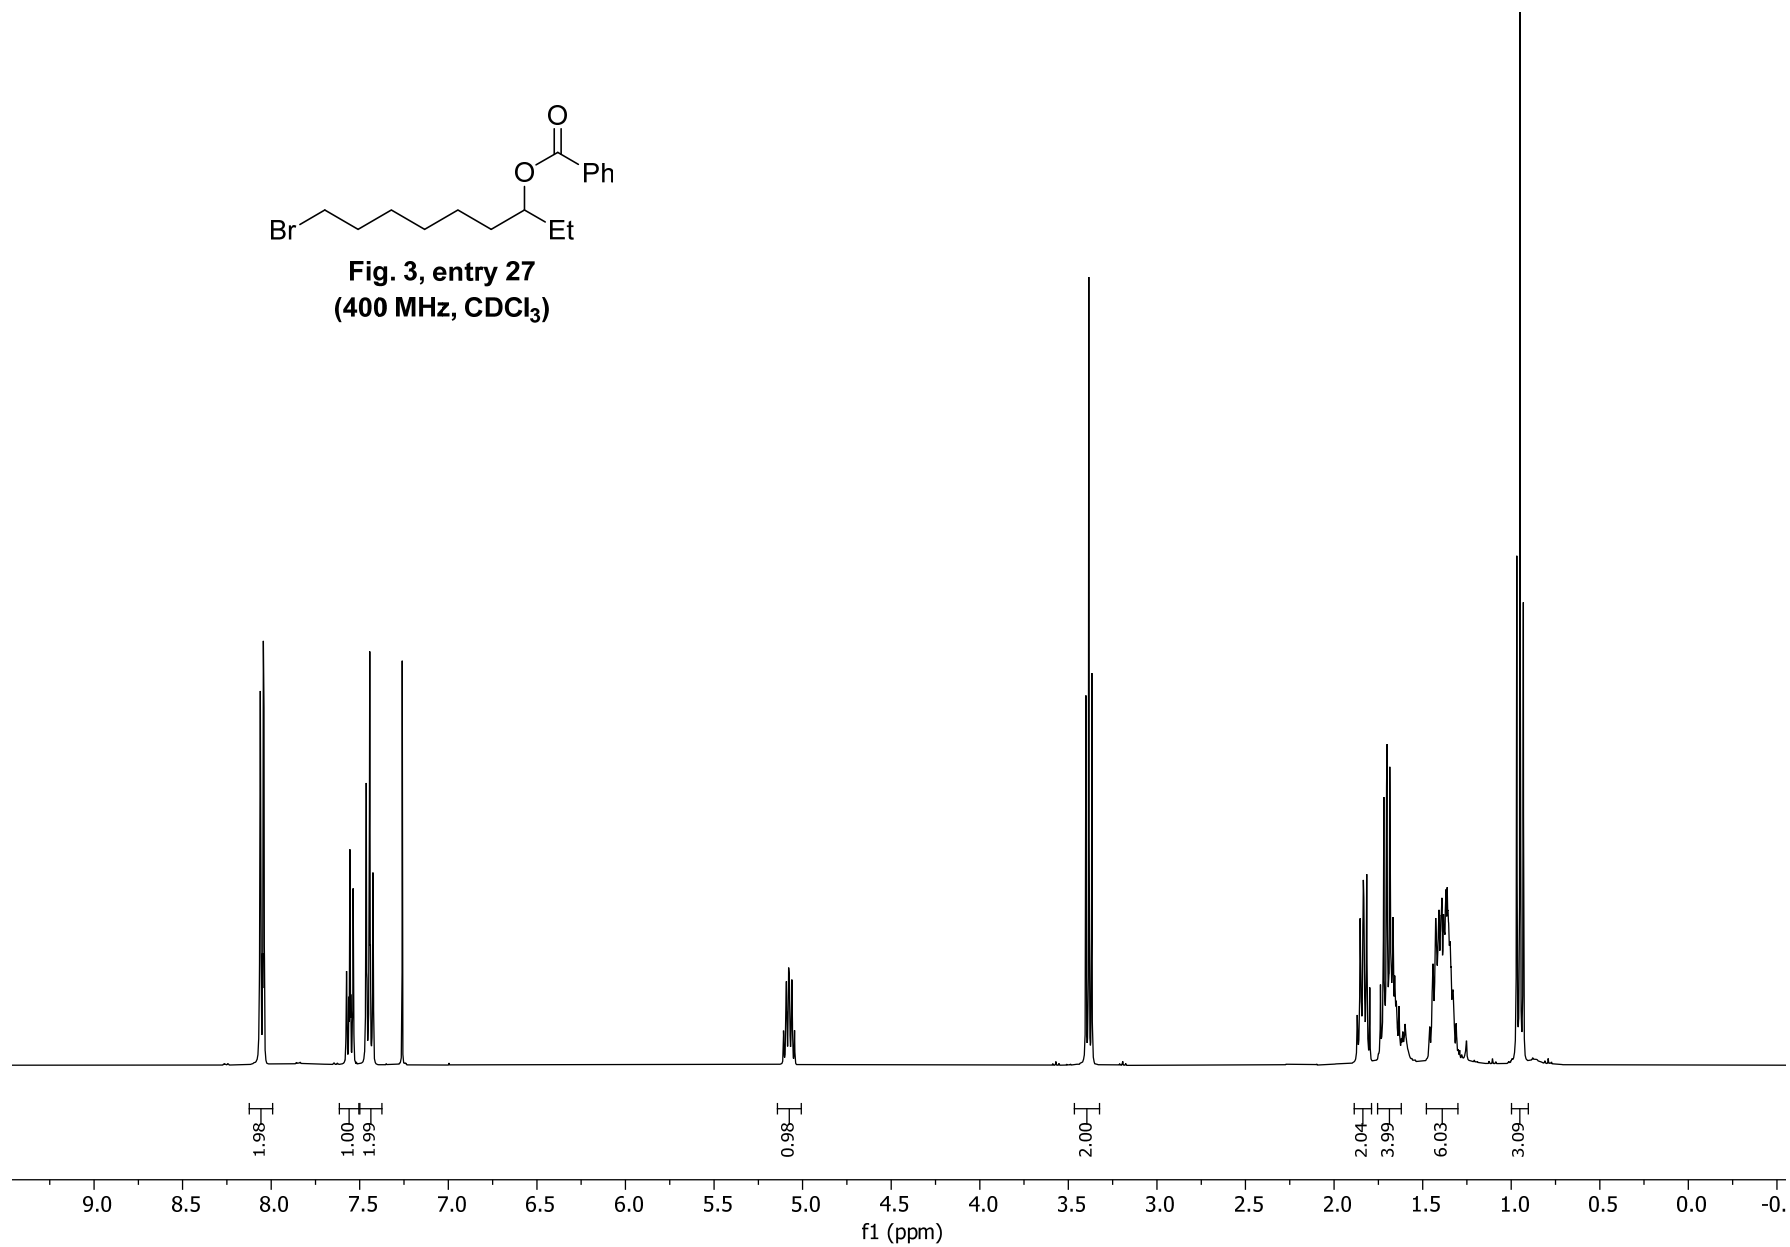

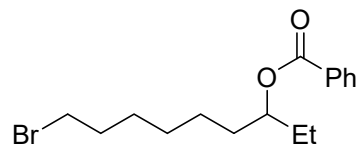

Fig. 3, entry 27  
(101 MHz, CDCl<sub>3</sub>)

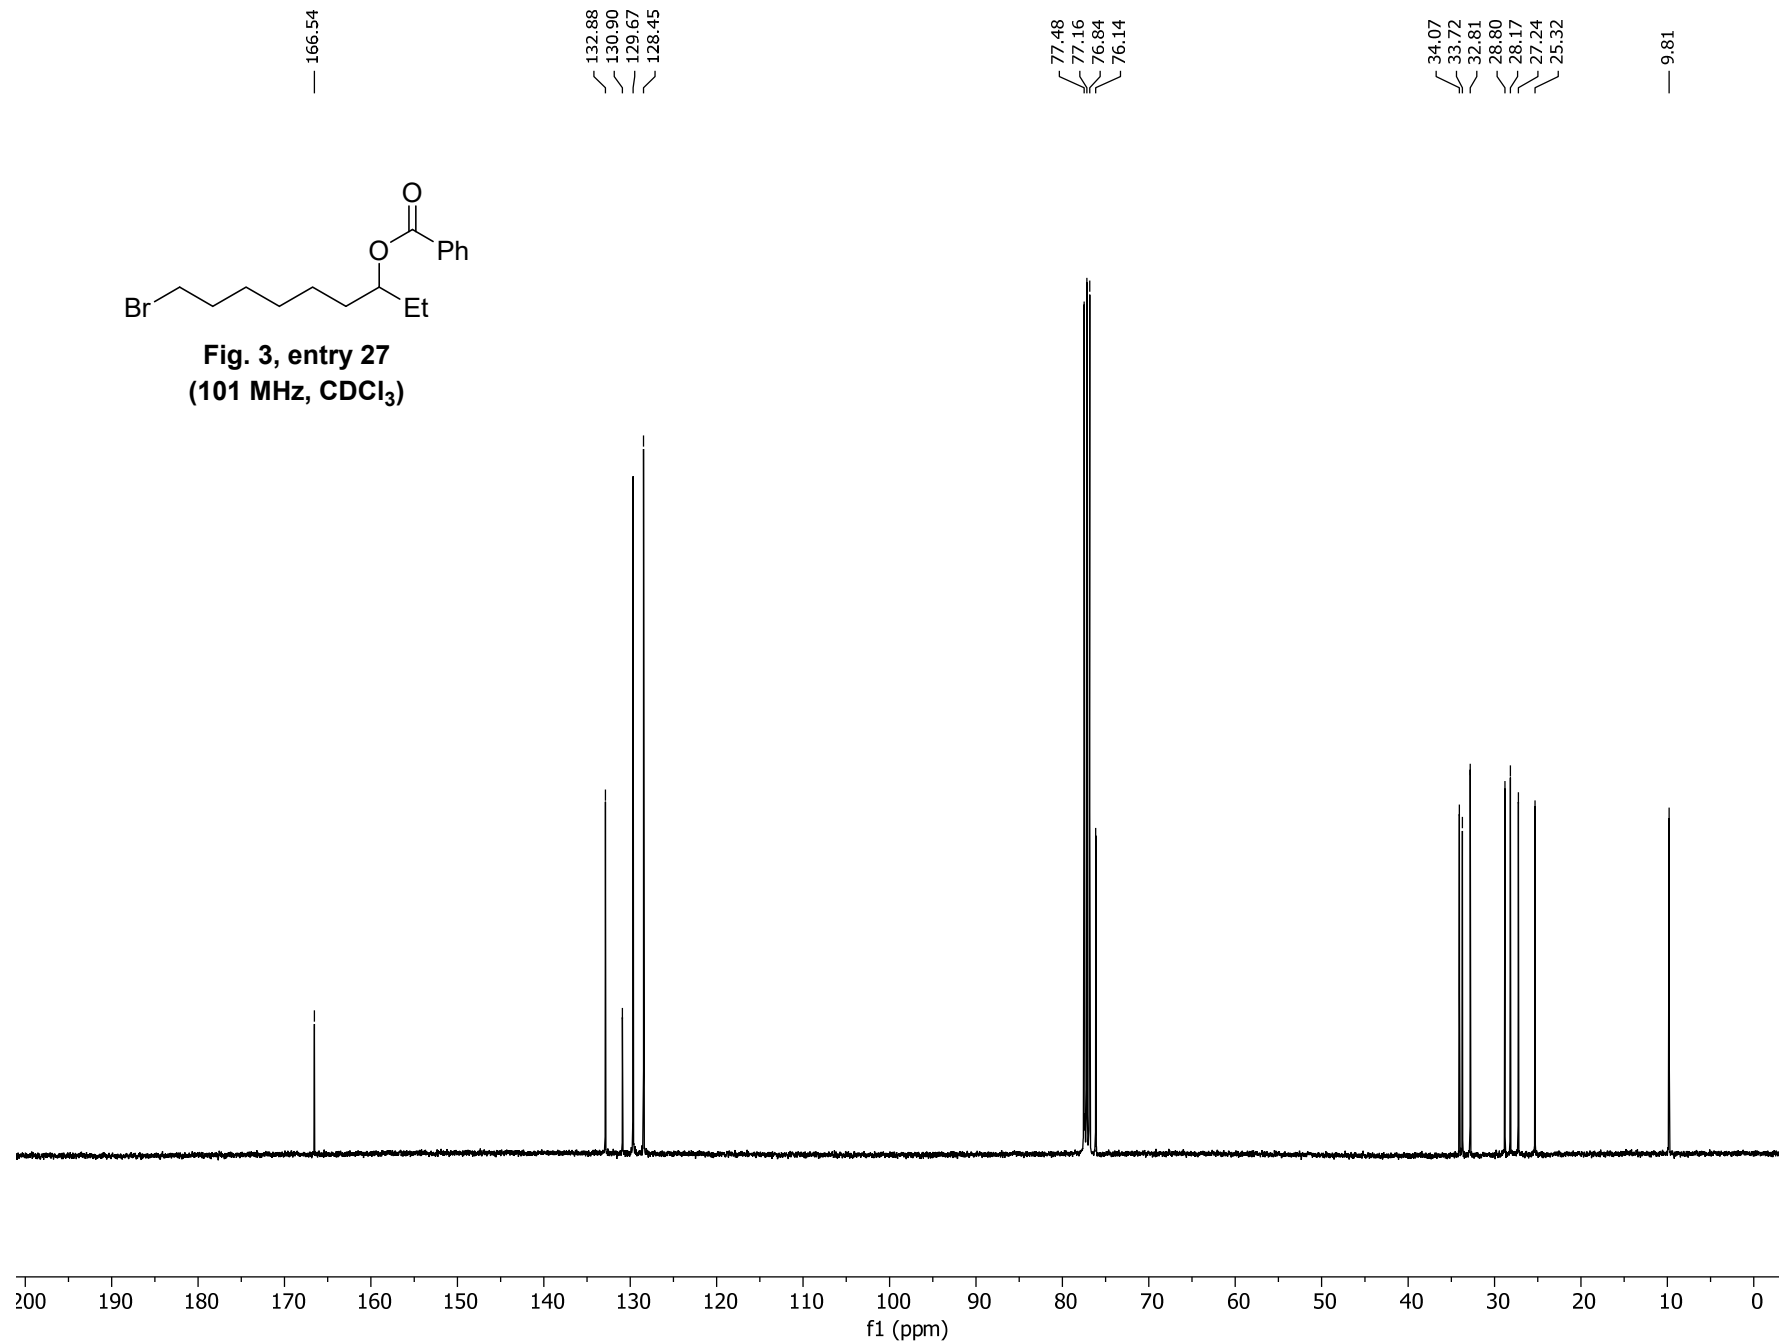

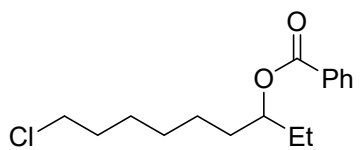

**Fig. 3, entry 28**  
**(400 MHz, CDCl<sub>3</sub>)**

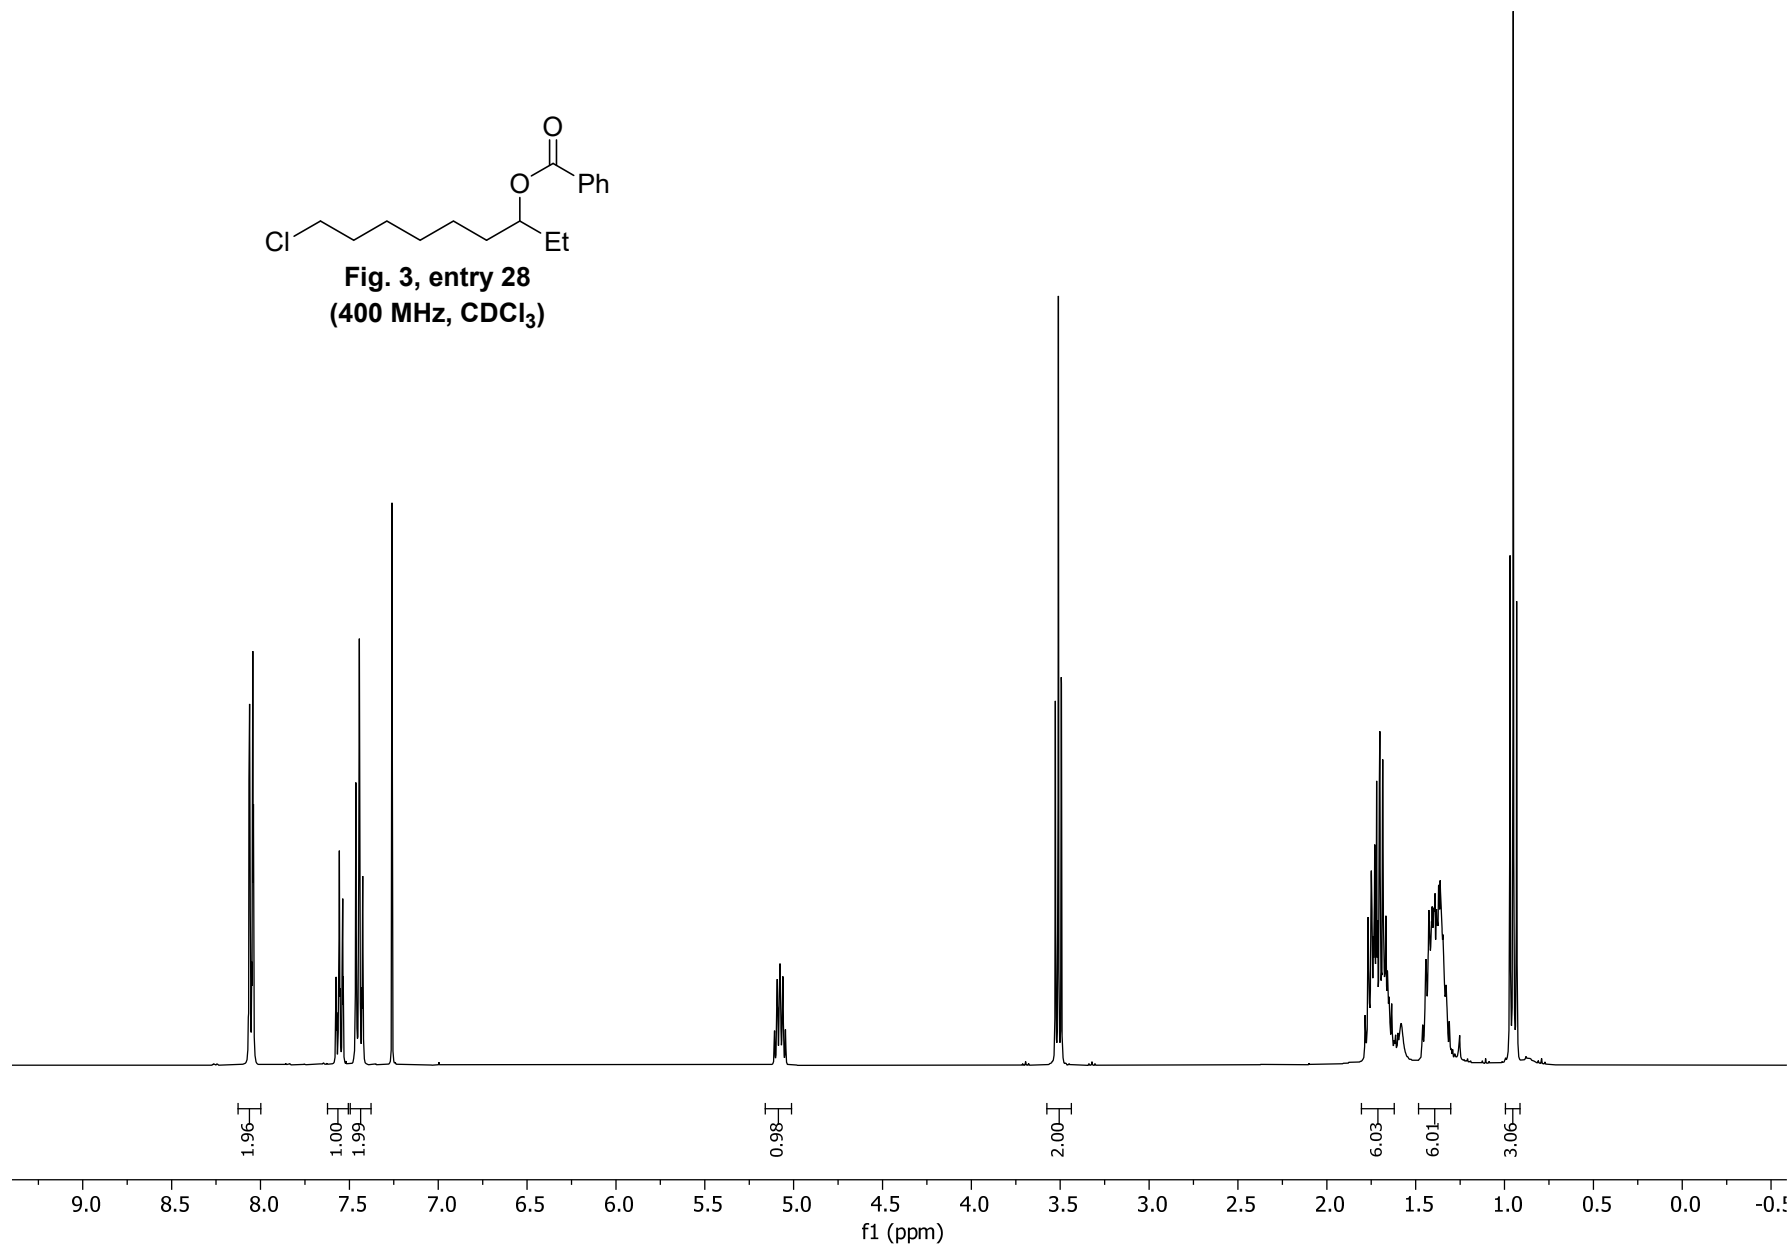

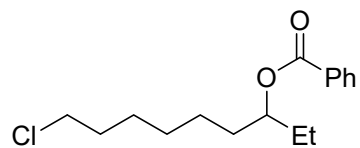

Fig. 3, entry 28  
(101 MHz, CDCl<sub>3</sub>)

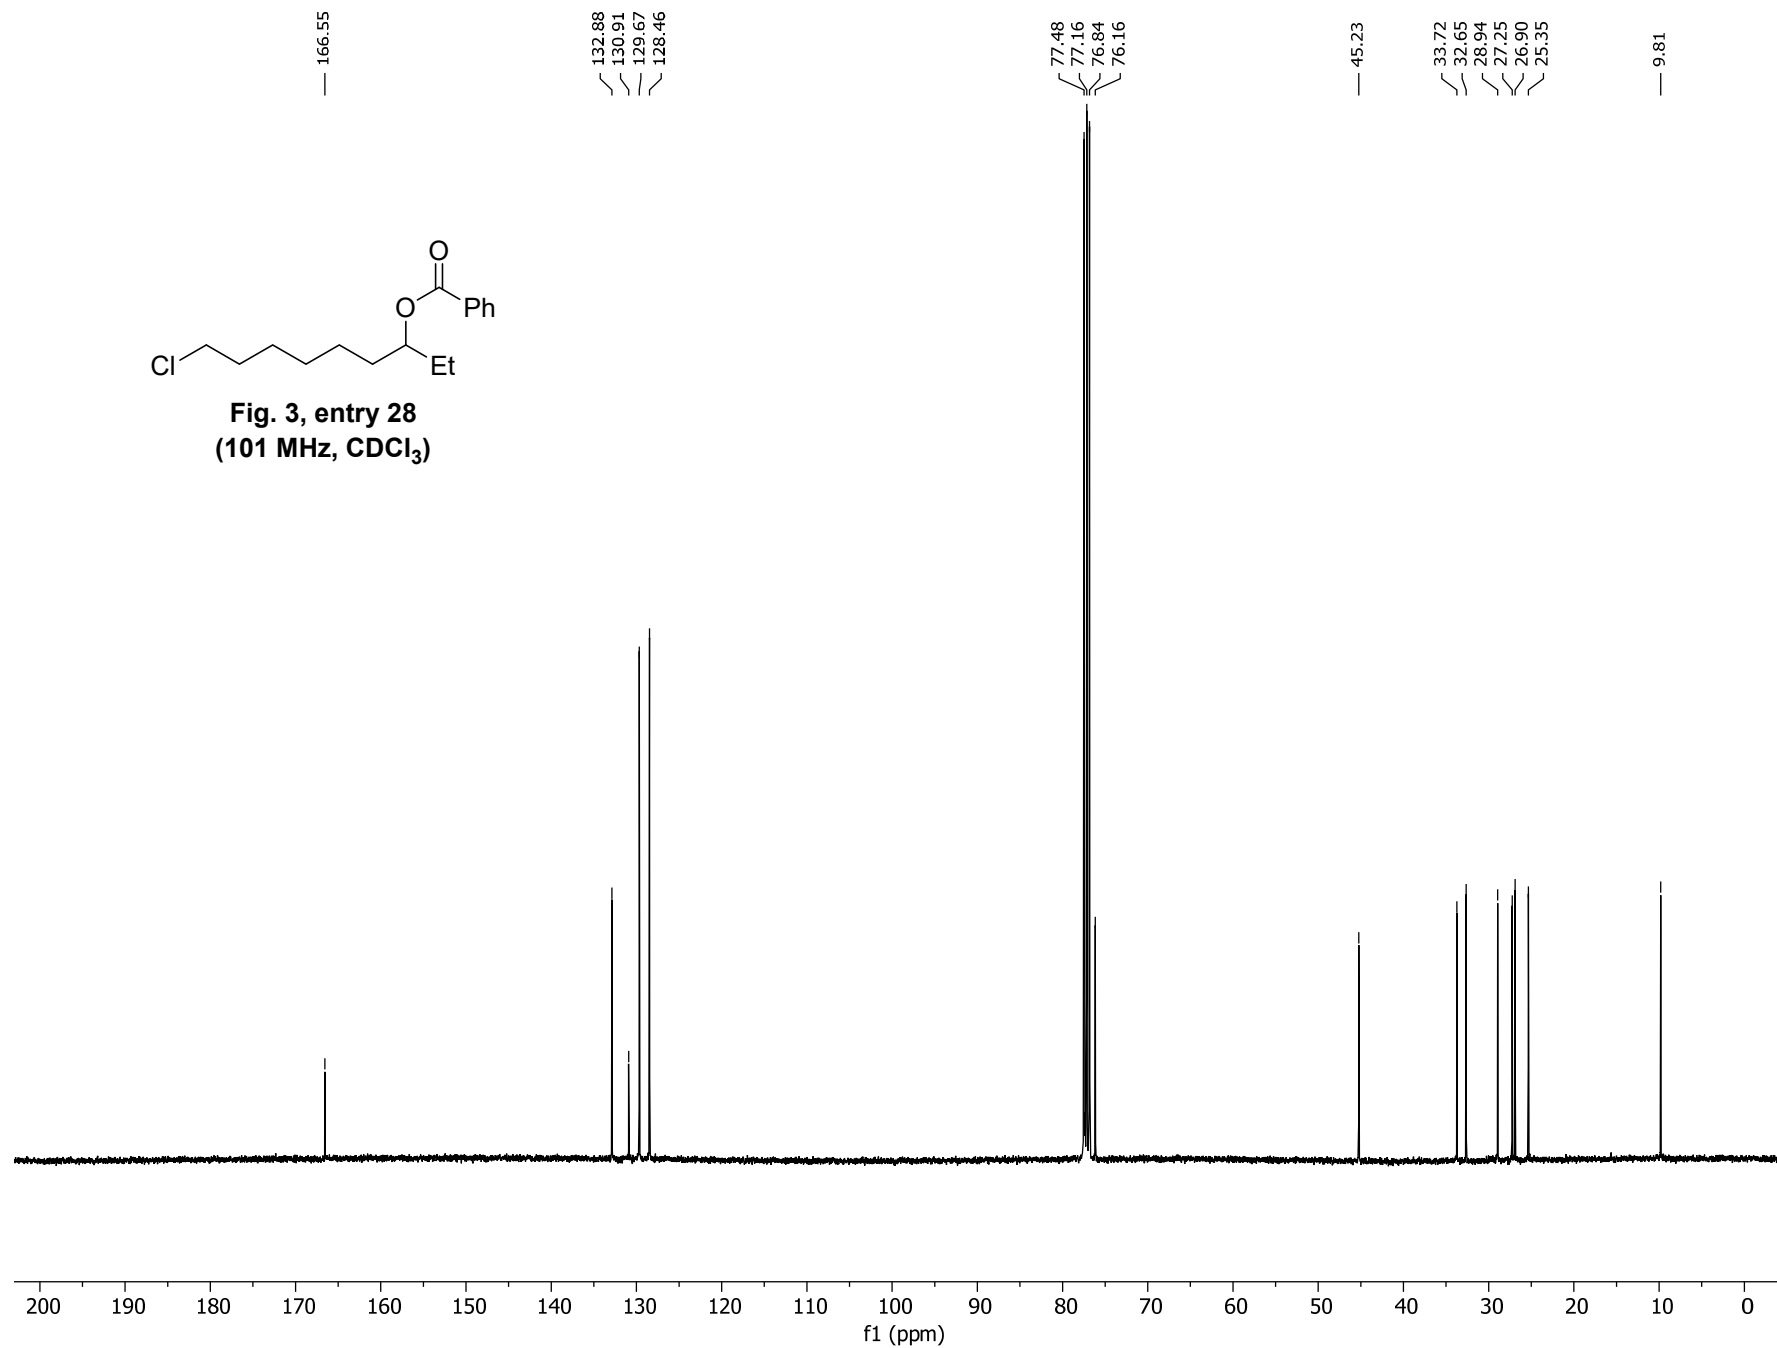

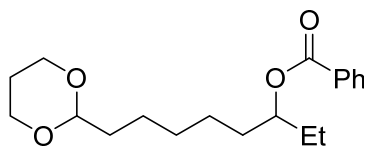

Fig. 3, entry 29  
(400 MHz, CDCl<sub>3</sub>)

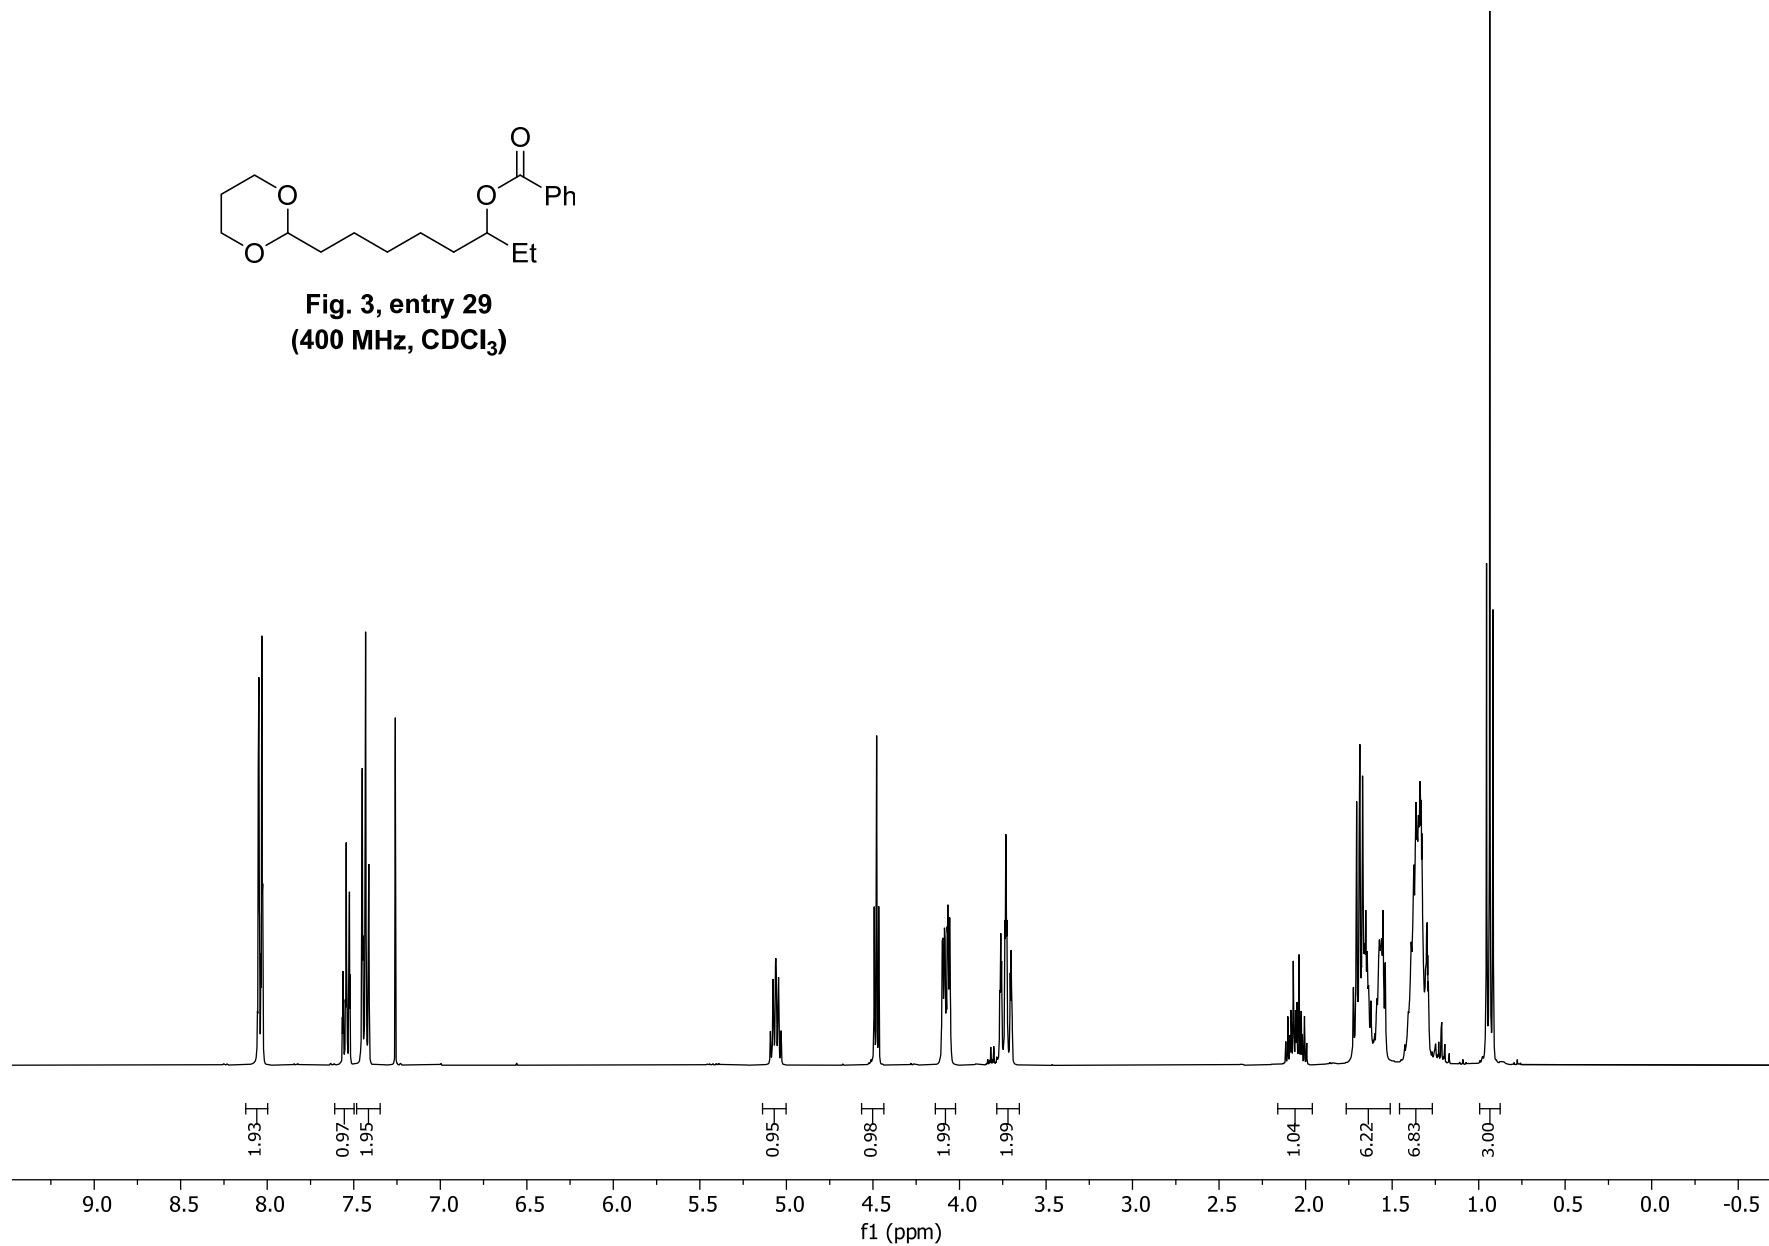

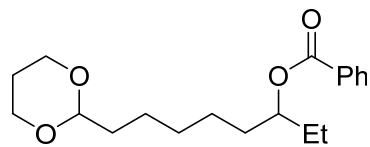

Fig. 3, entry 29  
(101 MHz, CDCl<sub>3</sub>)

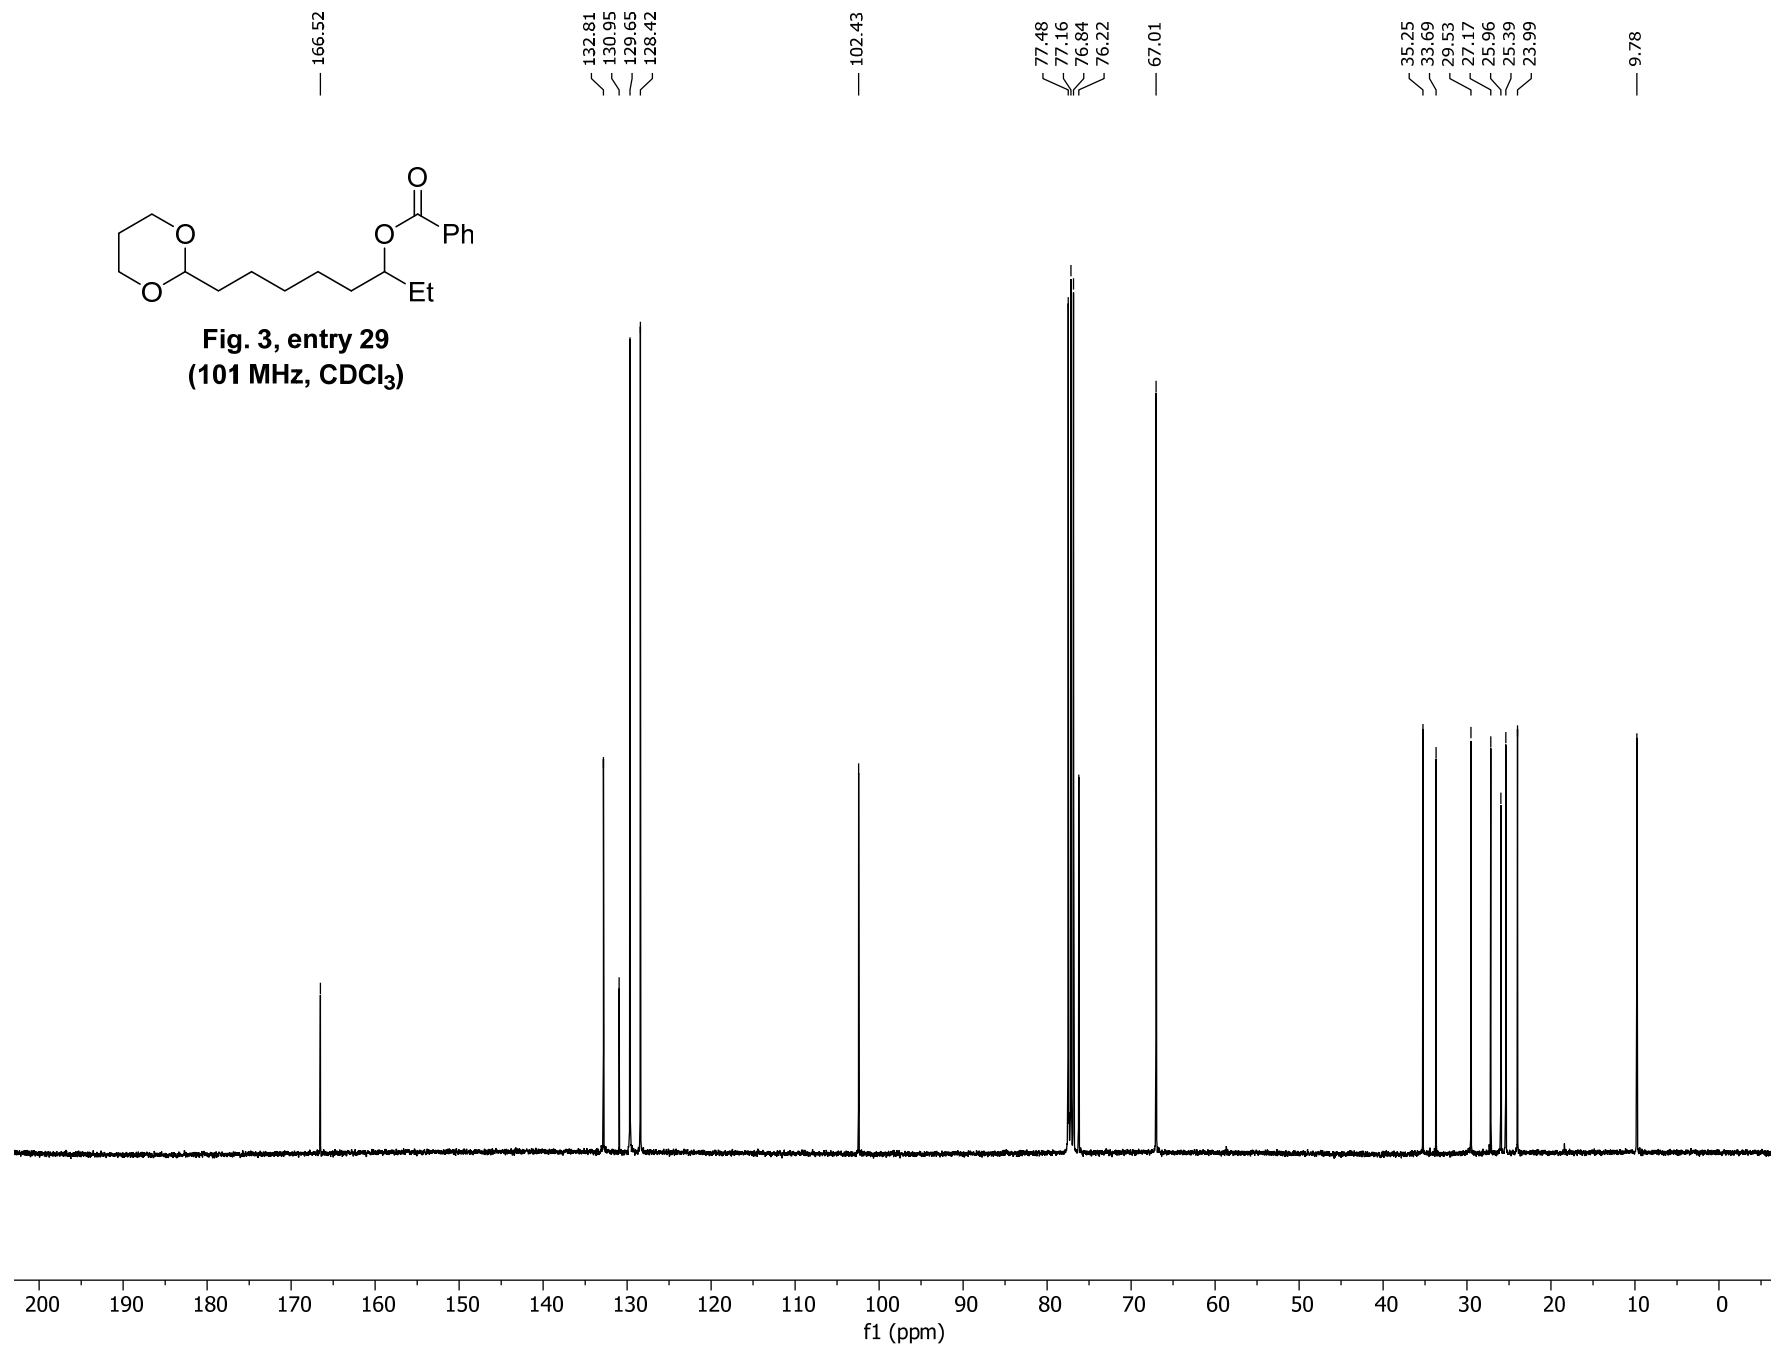

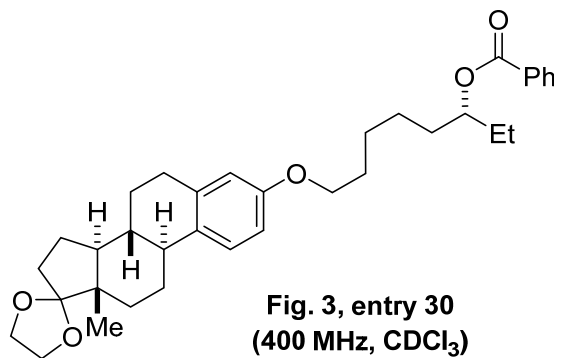

Fig. 3, entry 30  
(400 MHz, CDCl<sub>3</sub>)

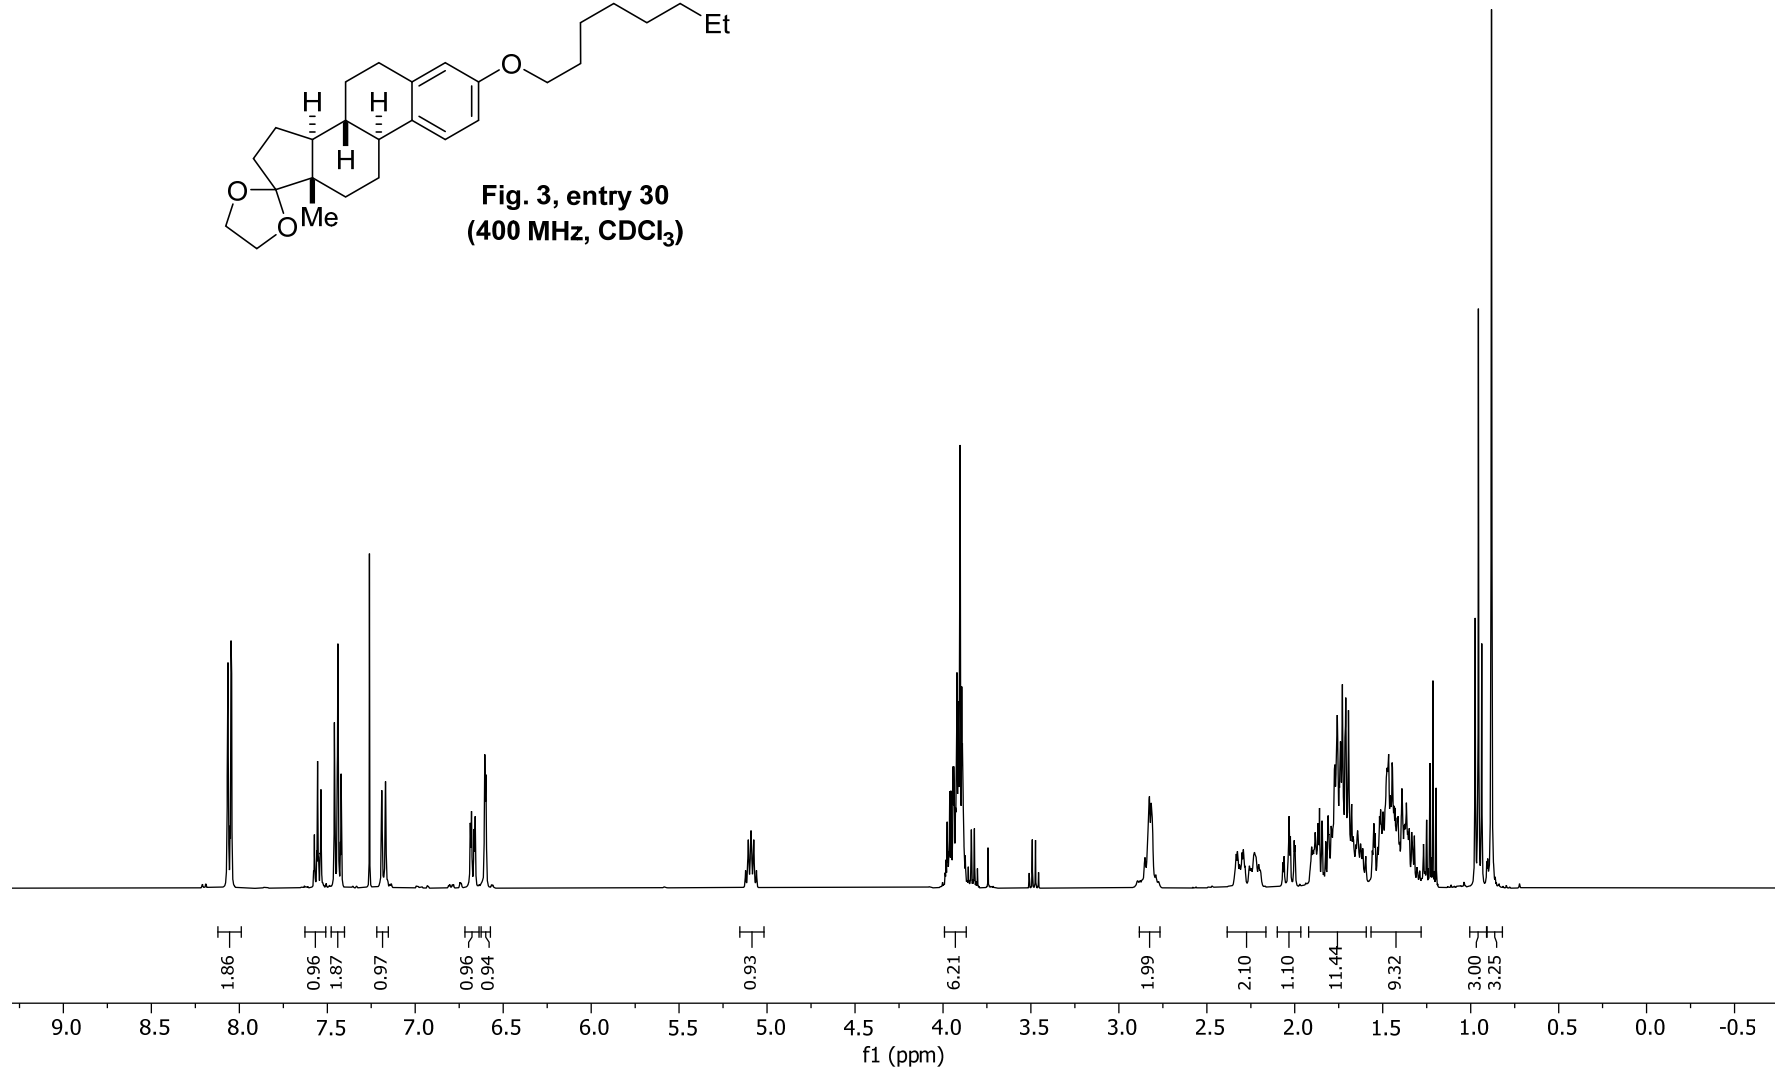



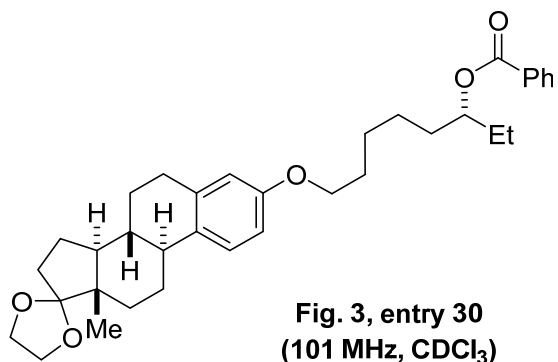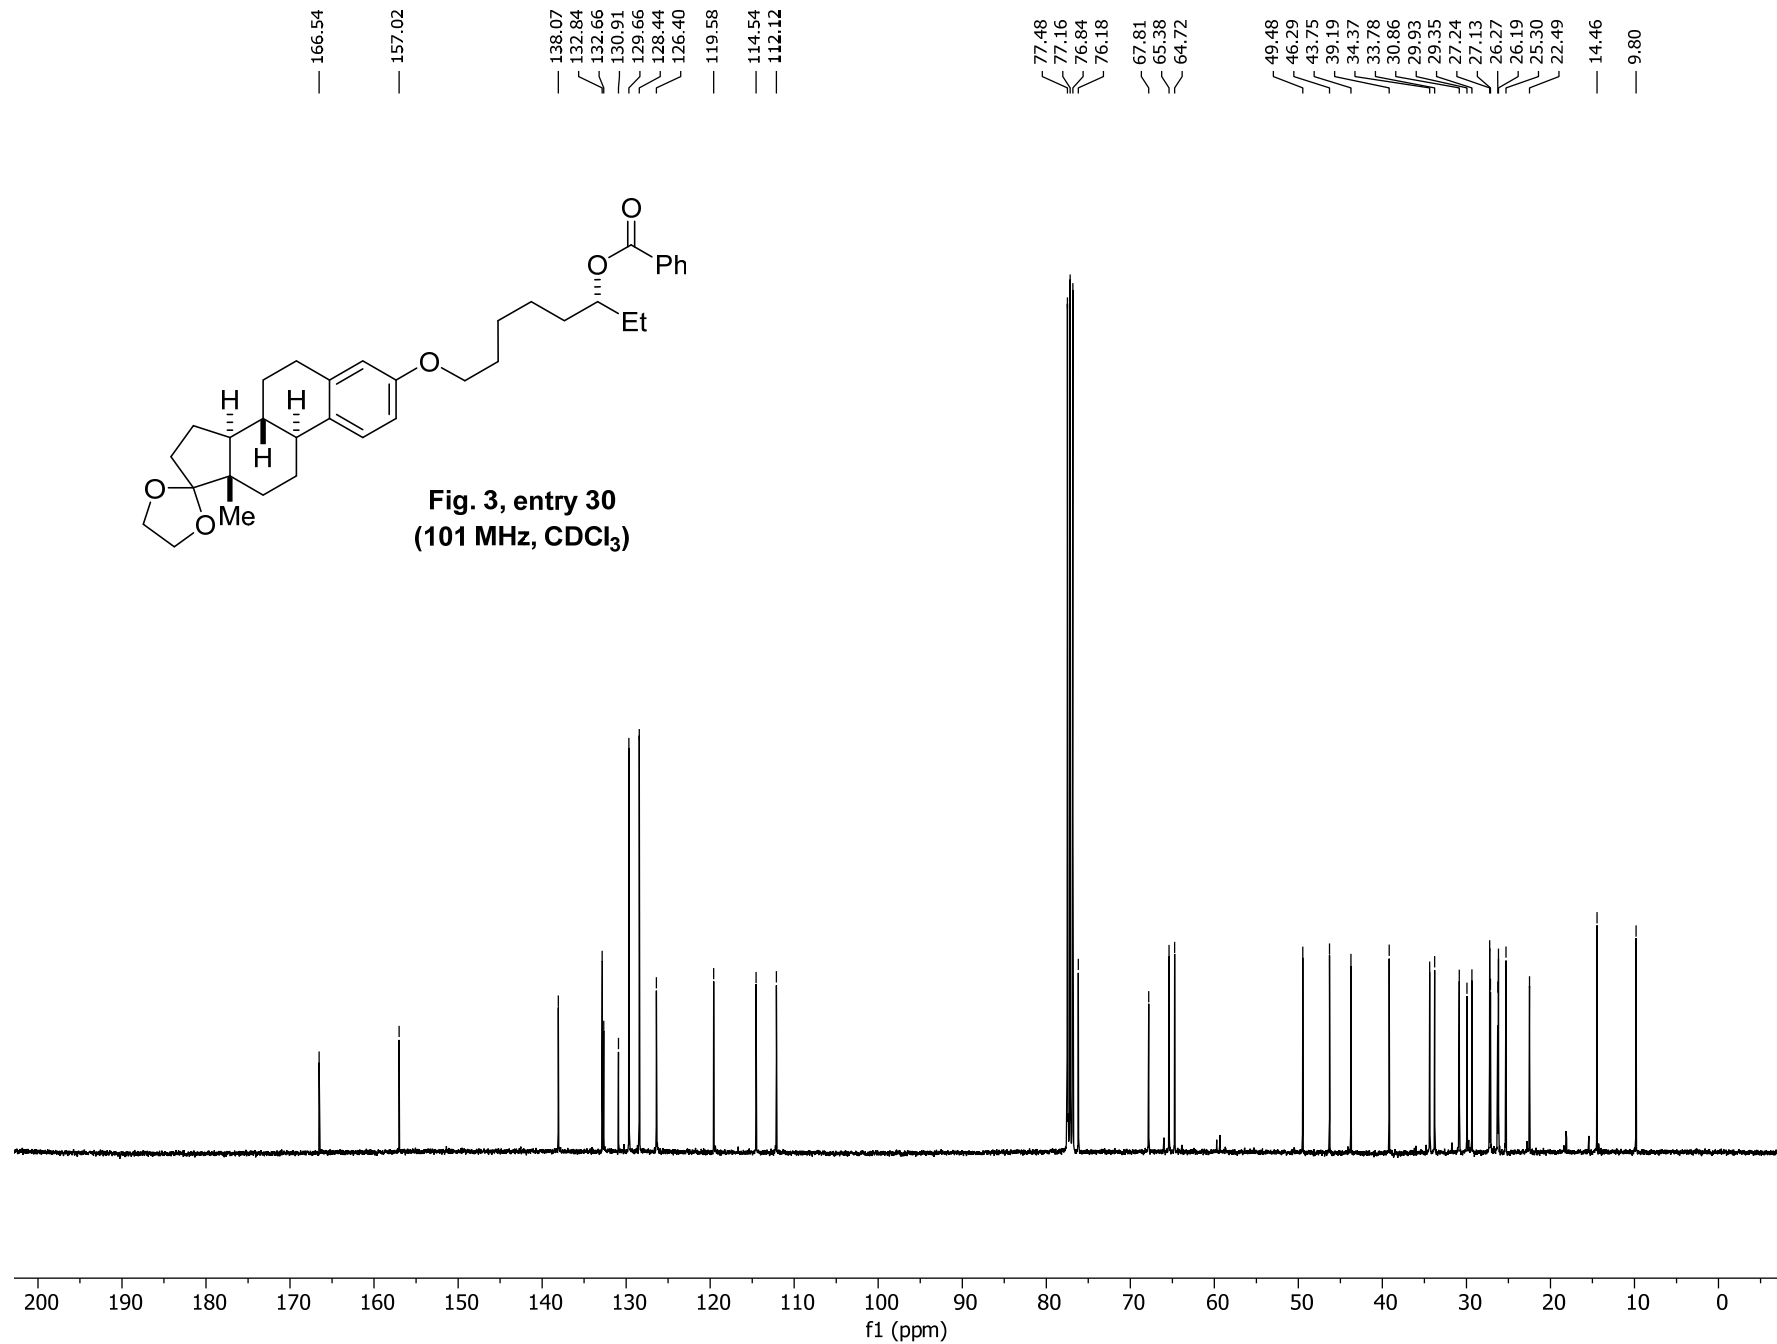

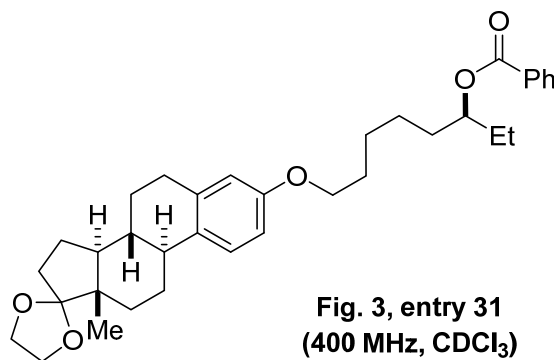

Fig. 3, entry 31  
(400 MHz, CDCl<sub>3</sub>)

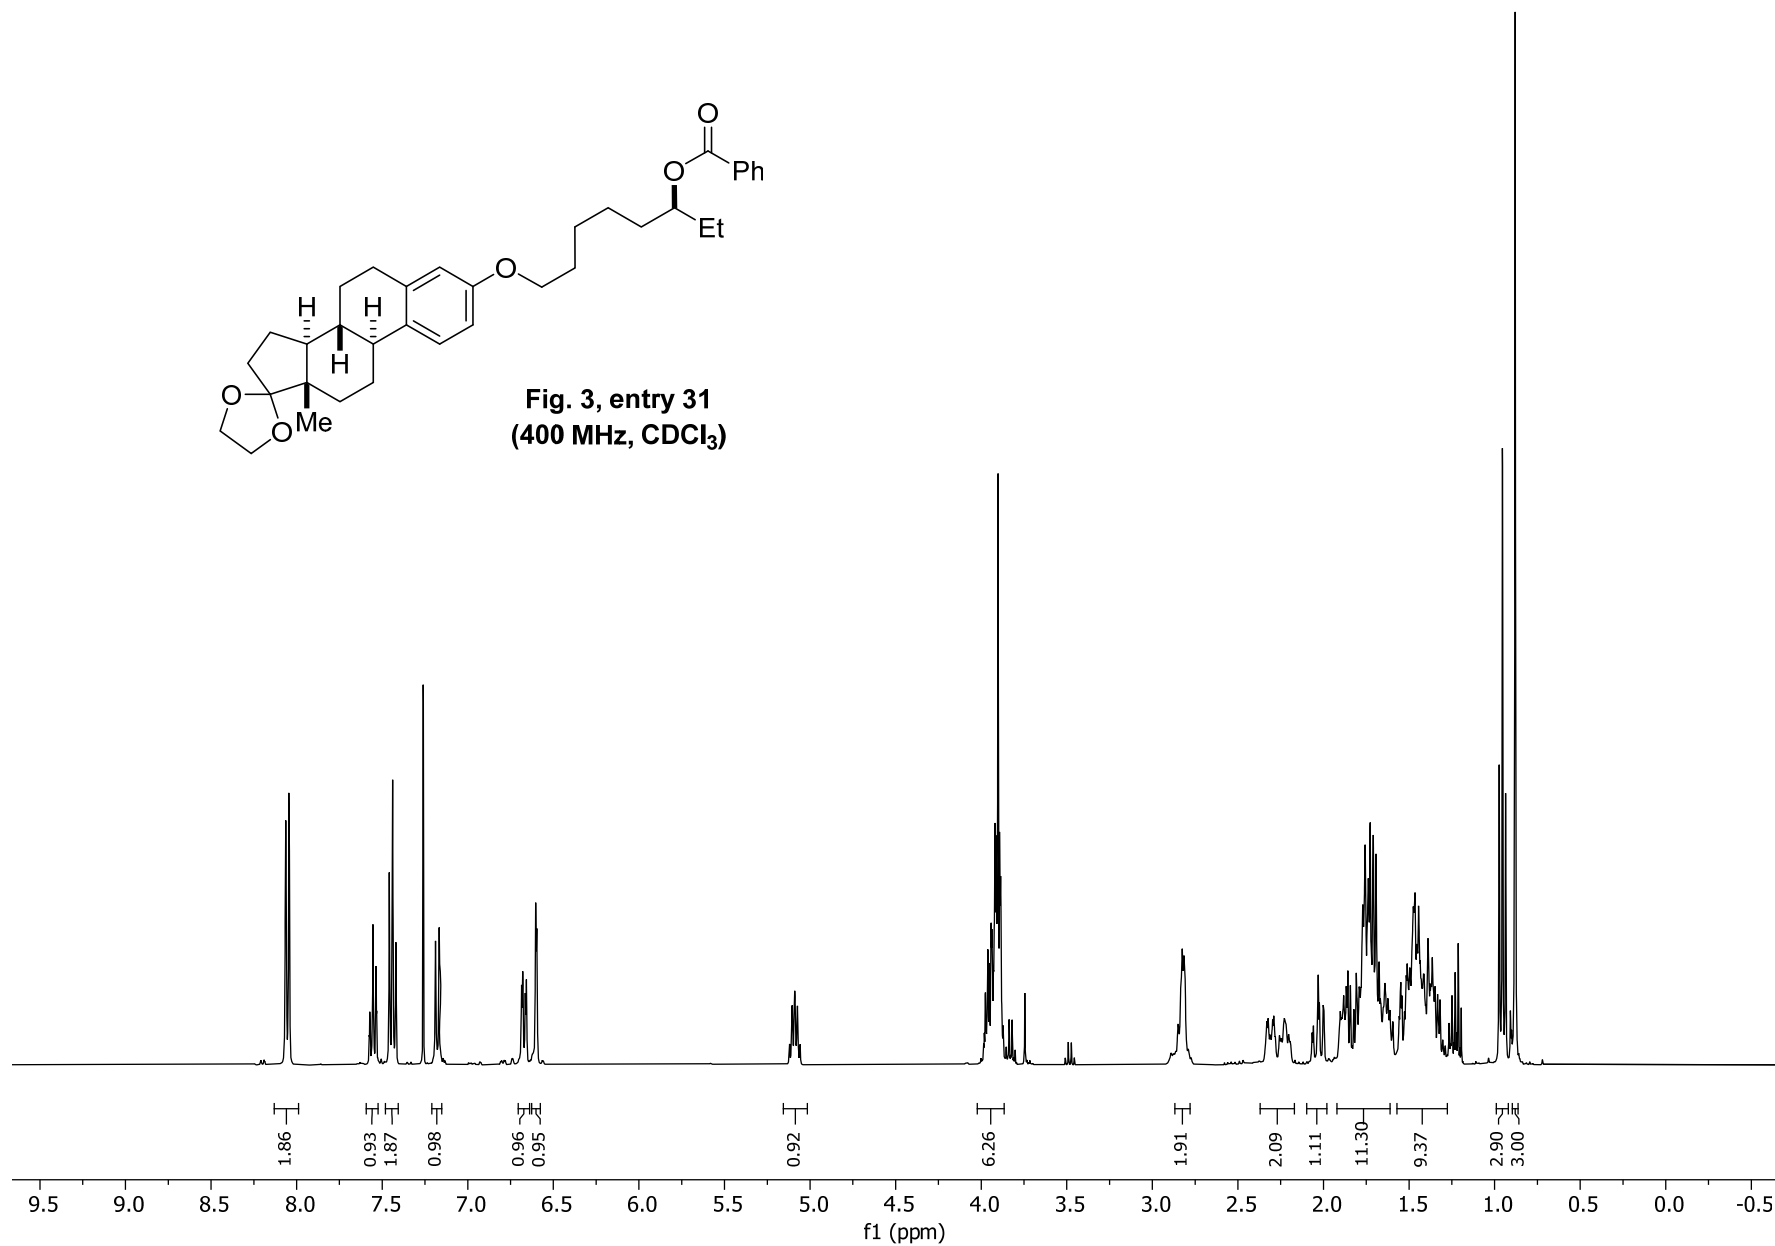

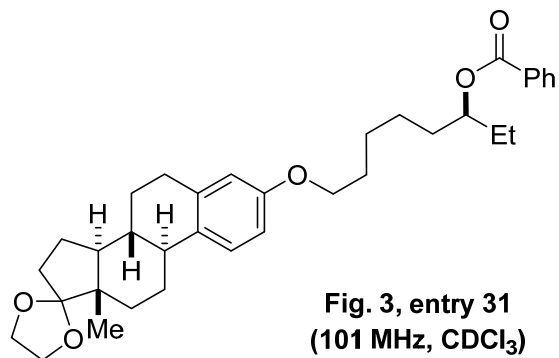

**Fig. 3, entry 31**  
(101 MHz, CDCl<sub>3</sub>)

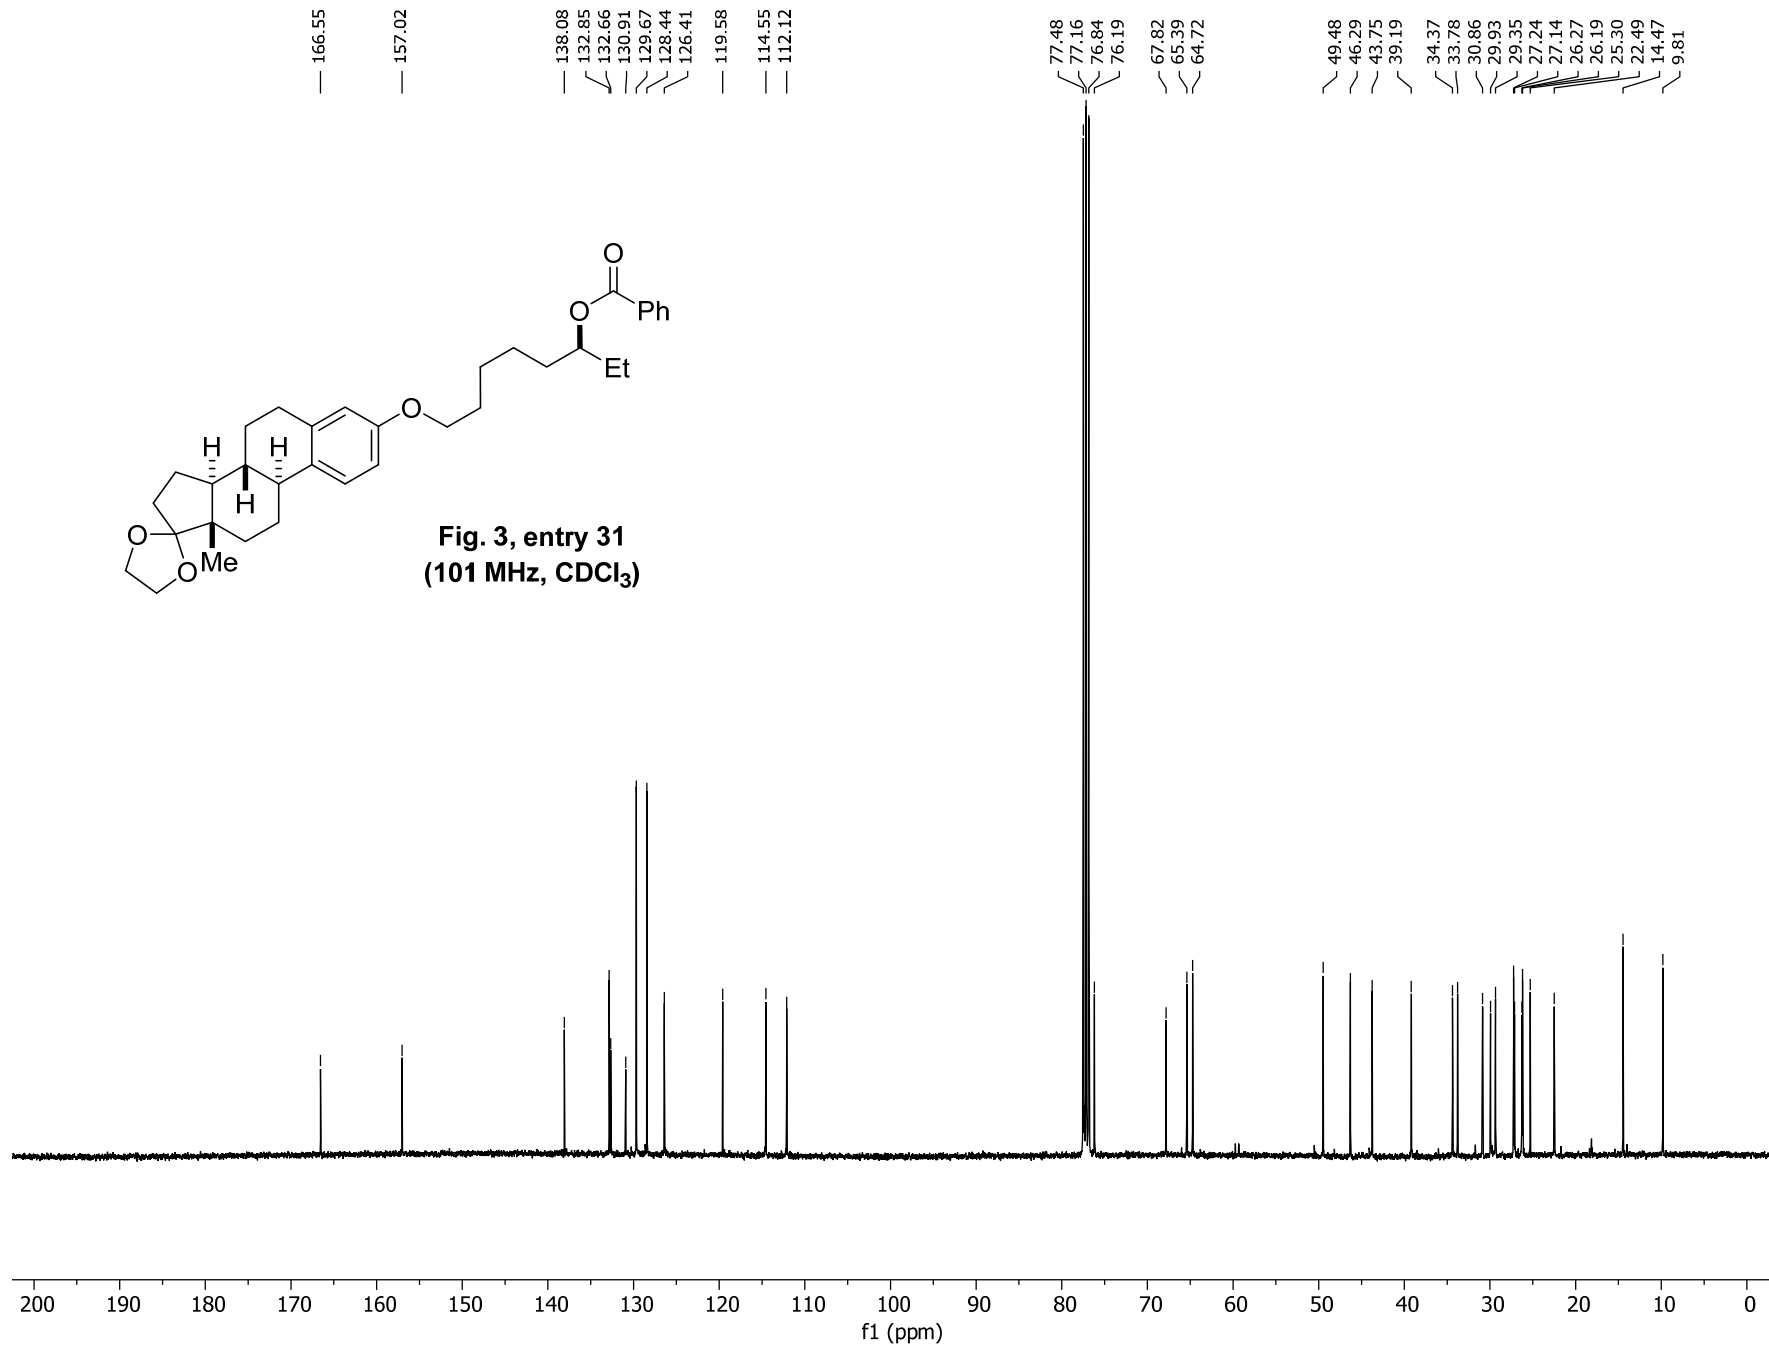

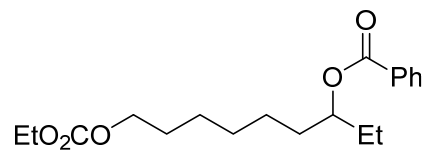

Fig. 3, entry 32  
(400 MHz, CDCl<sub>3</sub>)

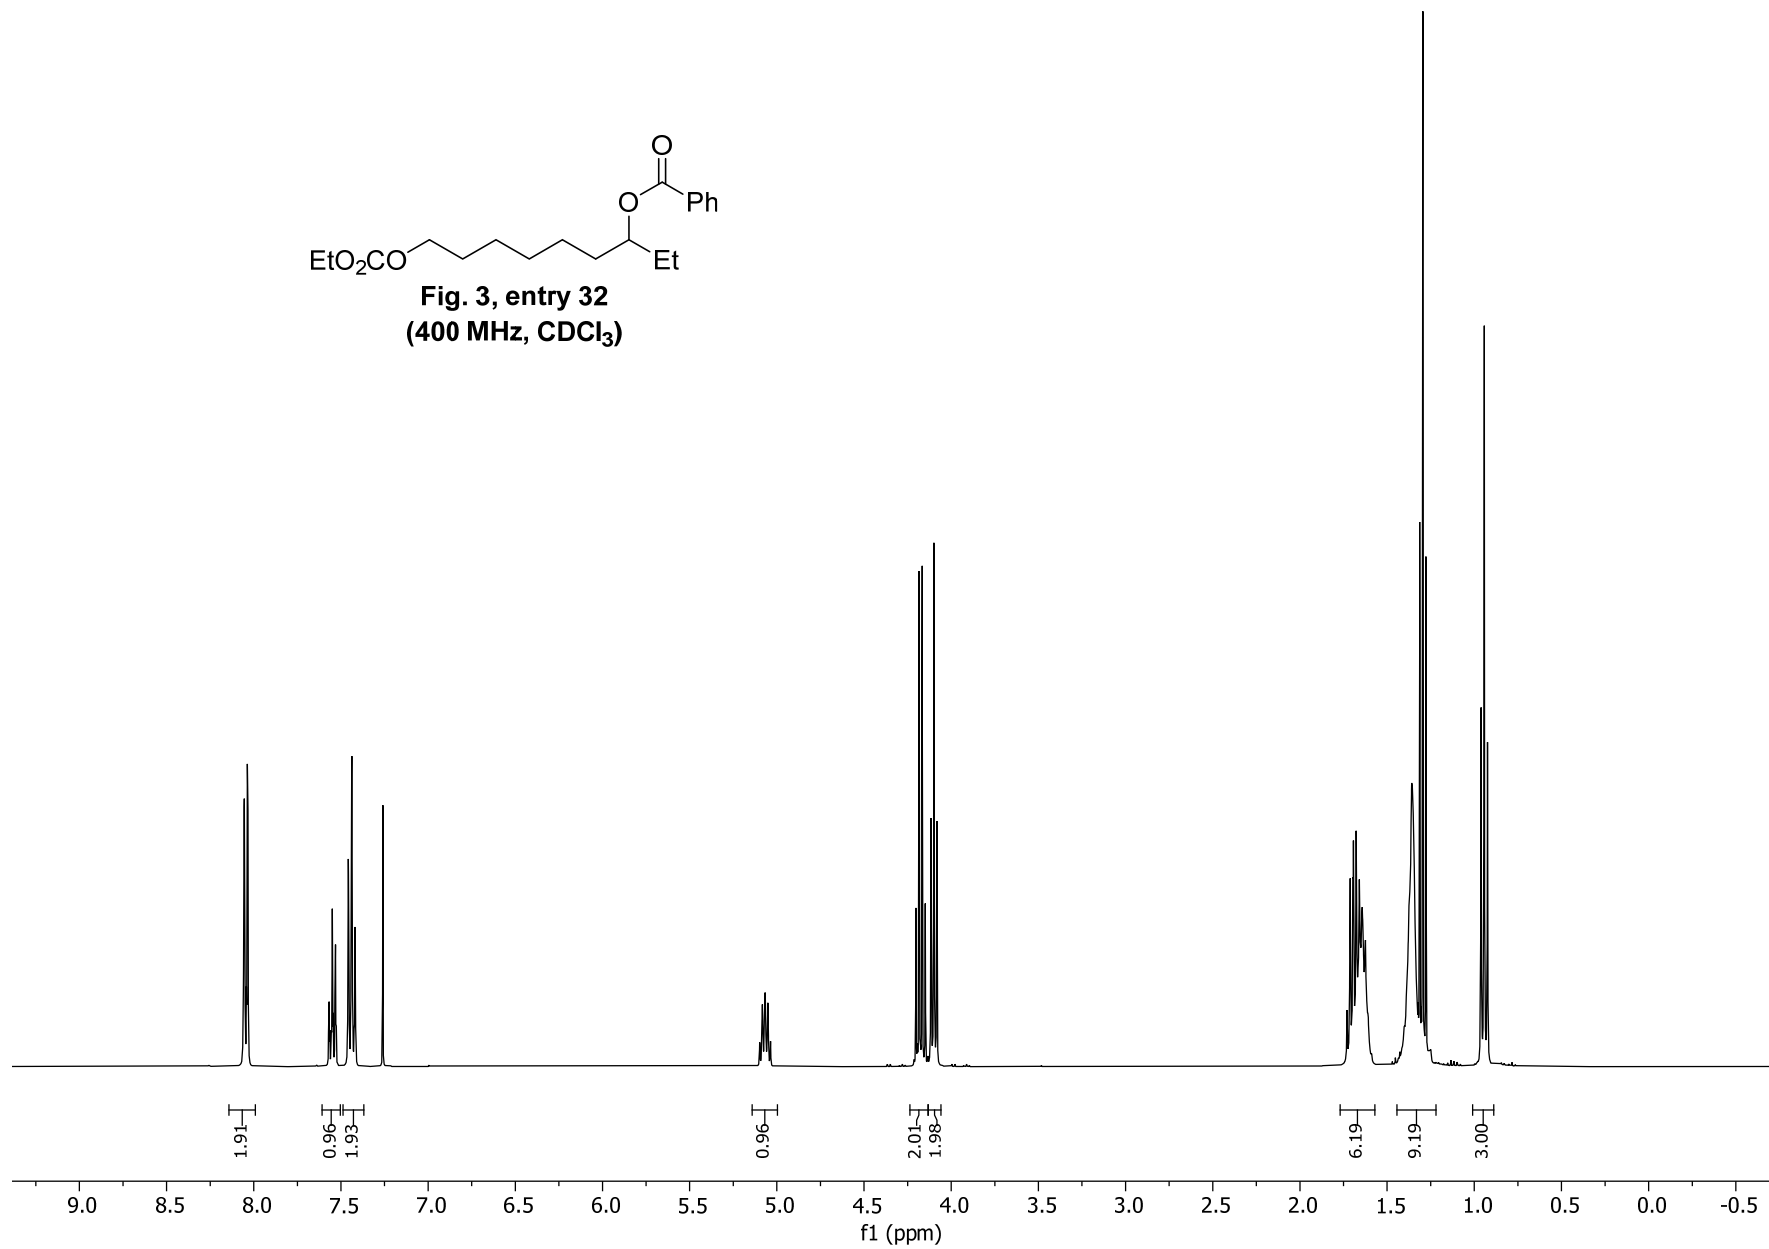

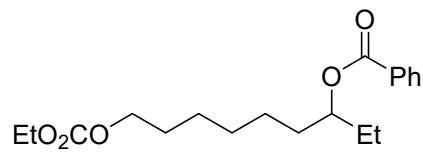

Fig. 3, entry 32  
(101 MHz, CDCl<sub>3</sub>)

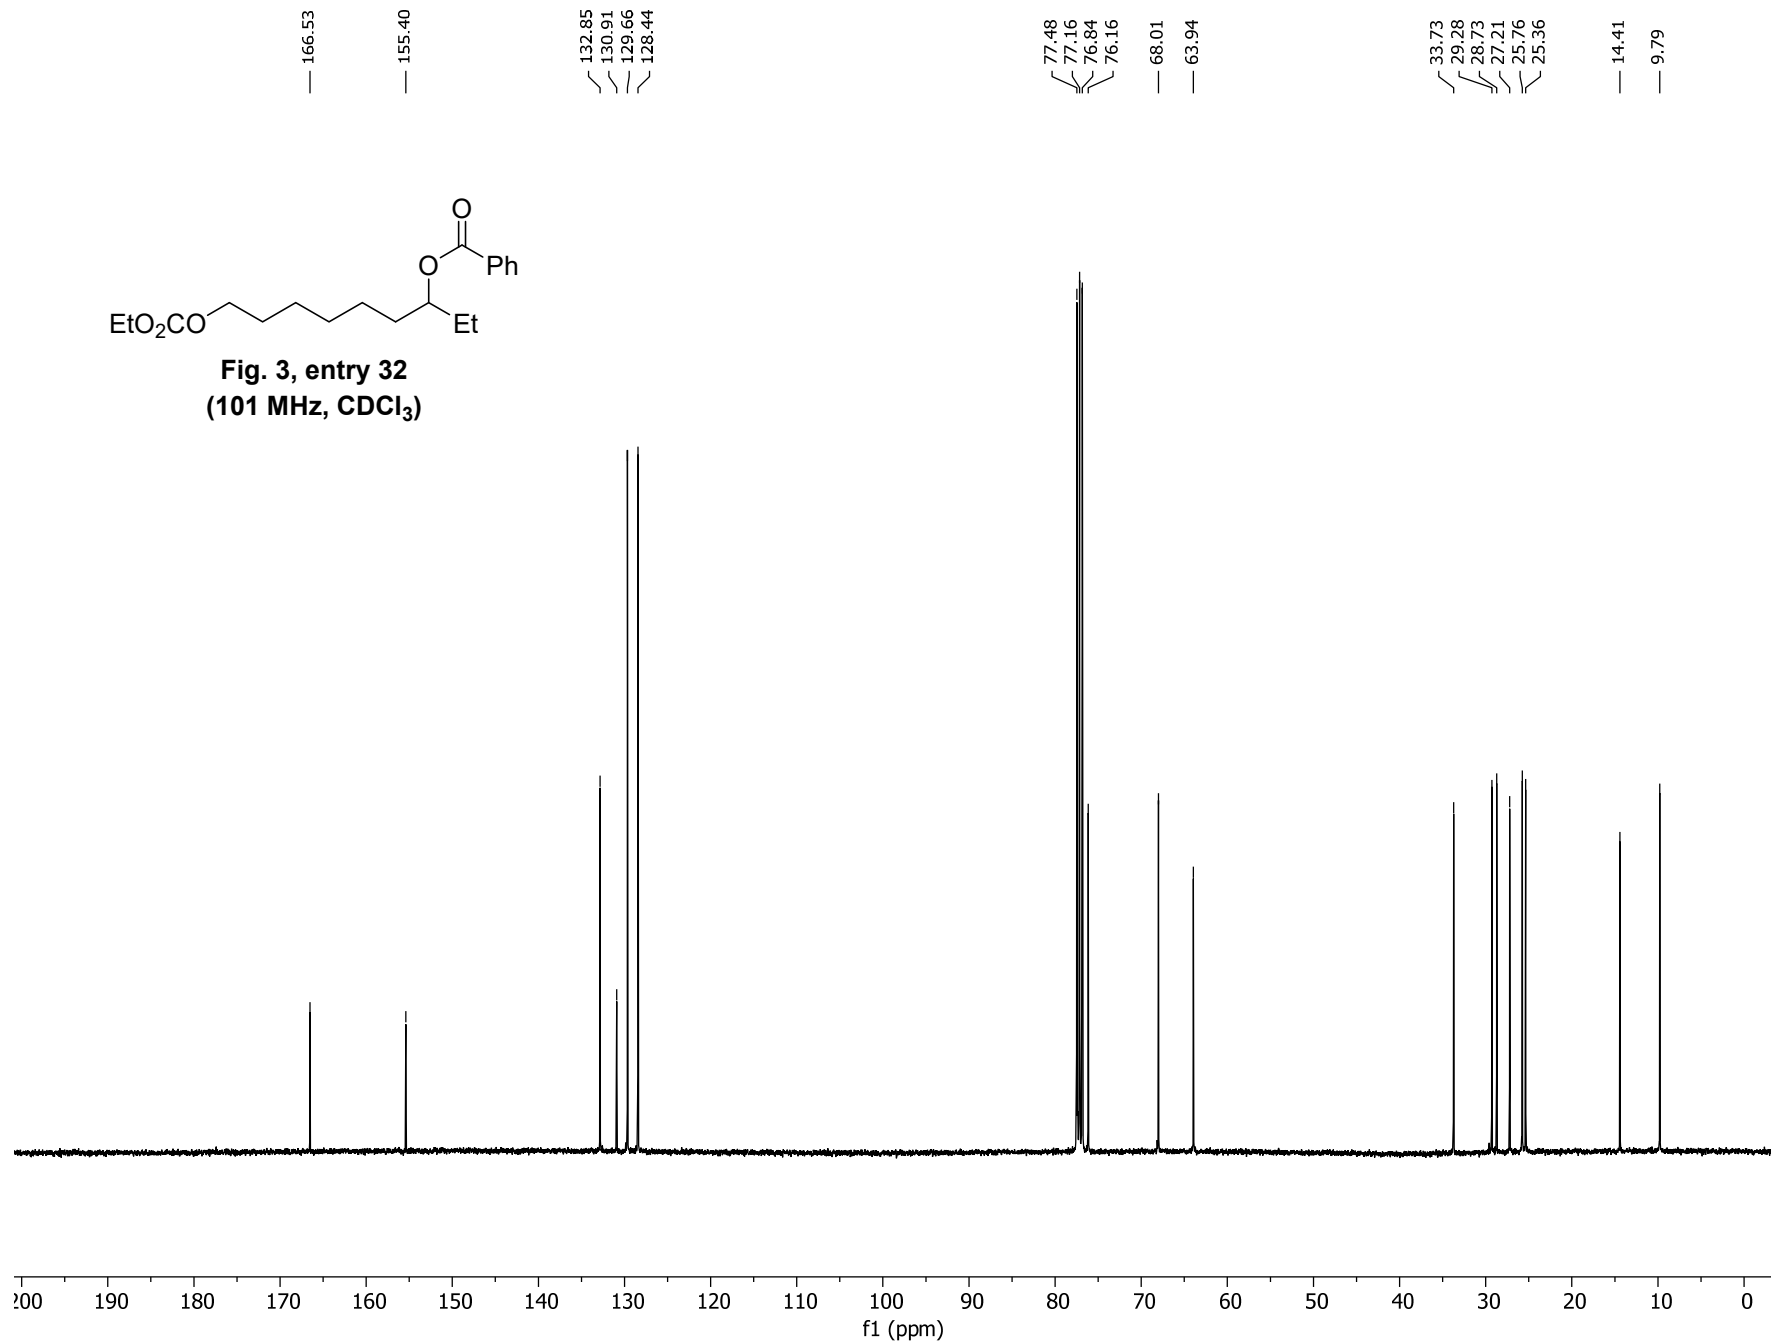

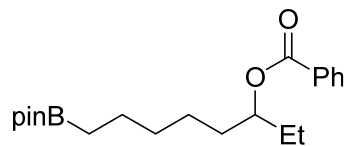

**Fig. 3, entry 33**  
**(400 MHz, CDCl<sub>3</sub>)**

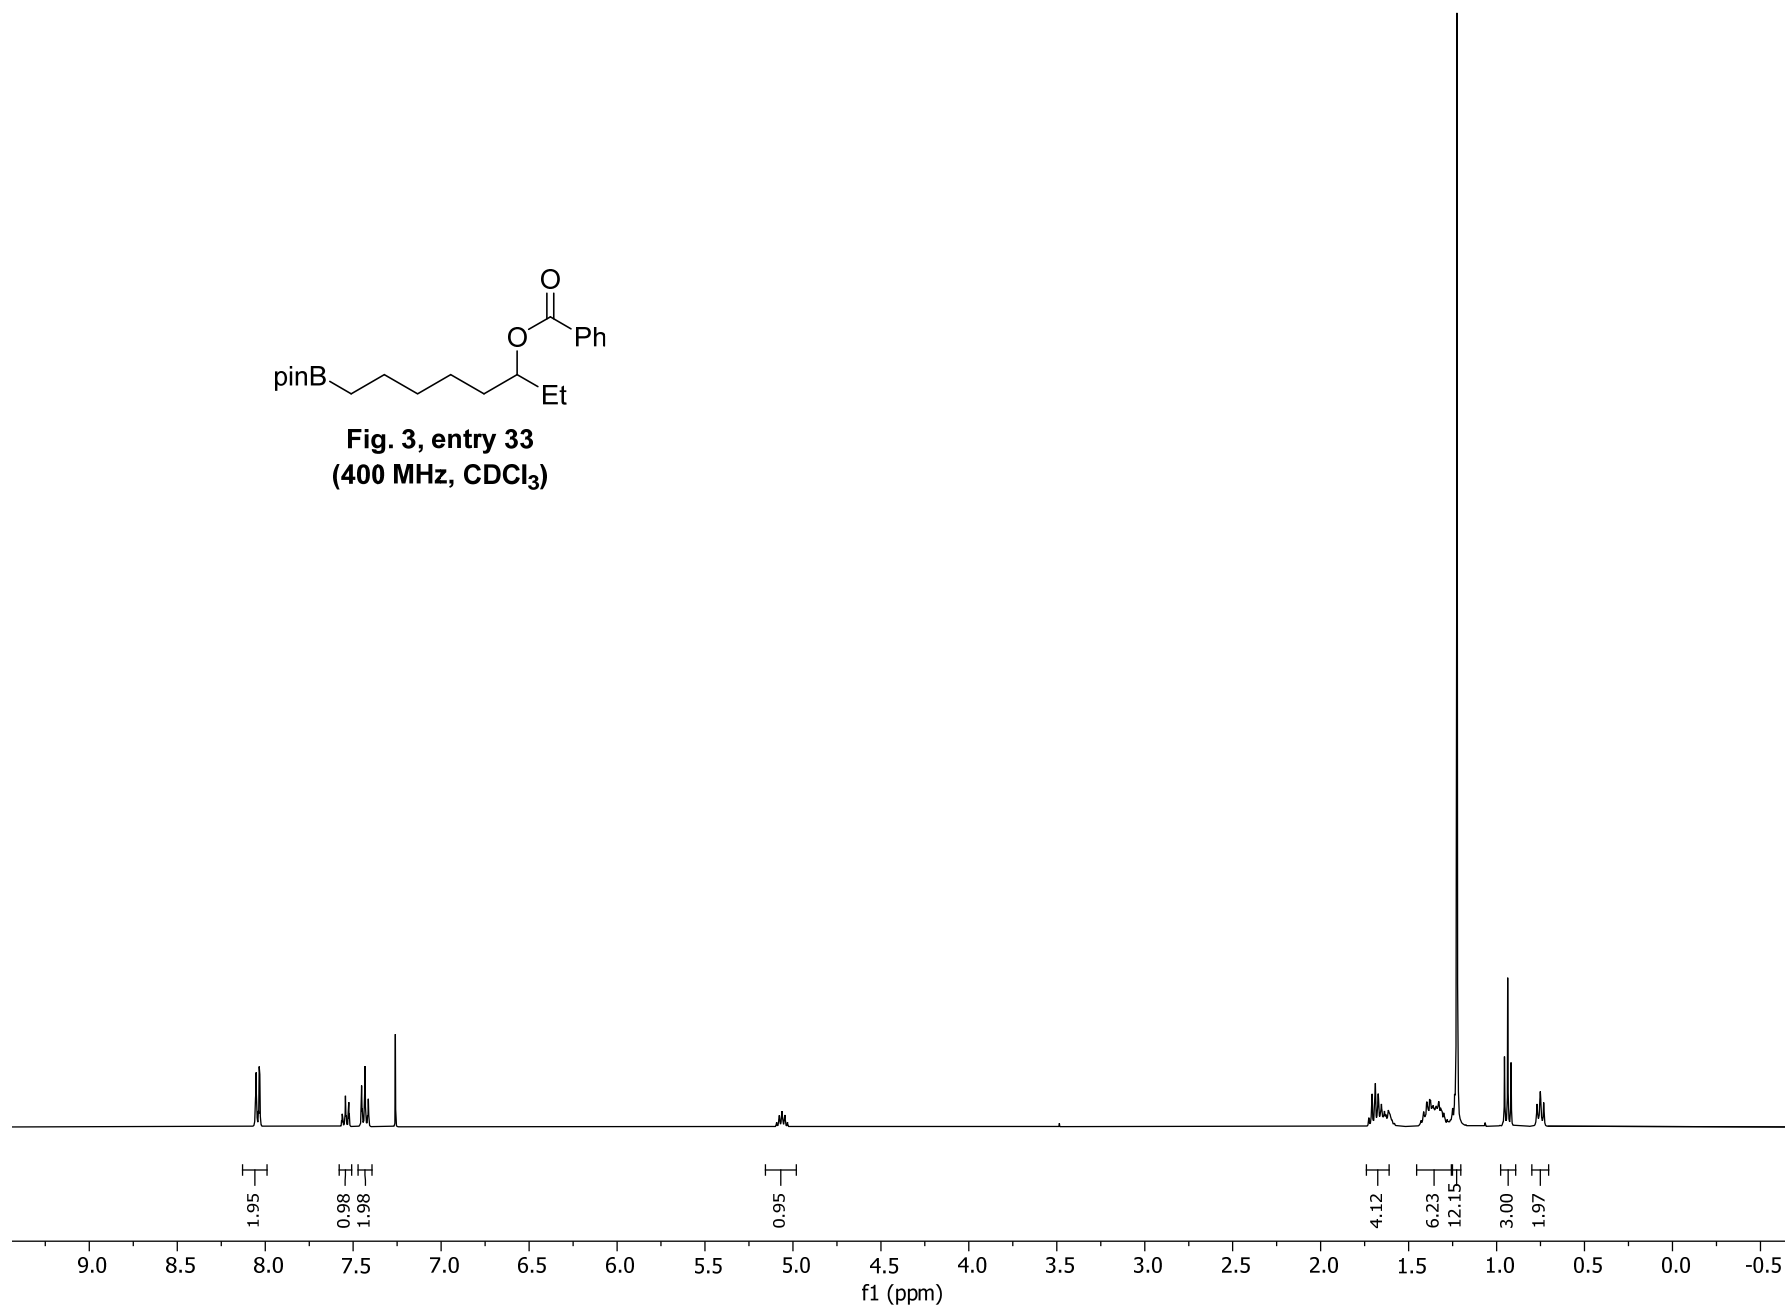

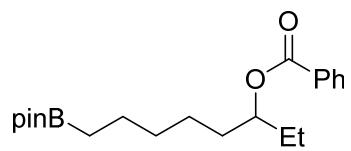

**Fig. 3, entry 33**  
**(101 MHz, CDCl<sub>3</sub>)**

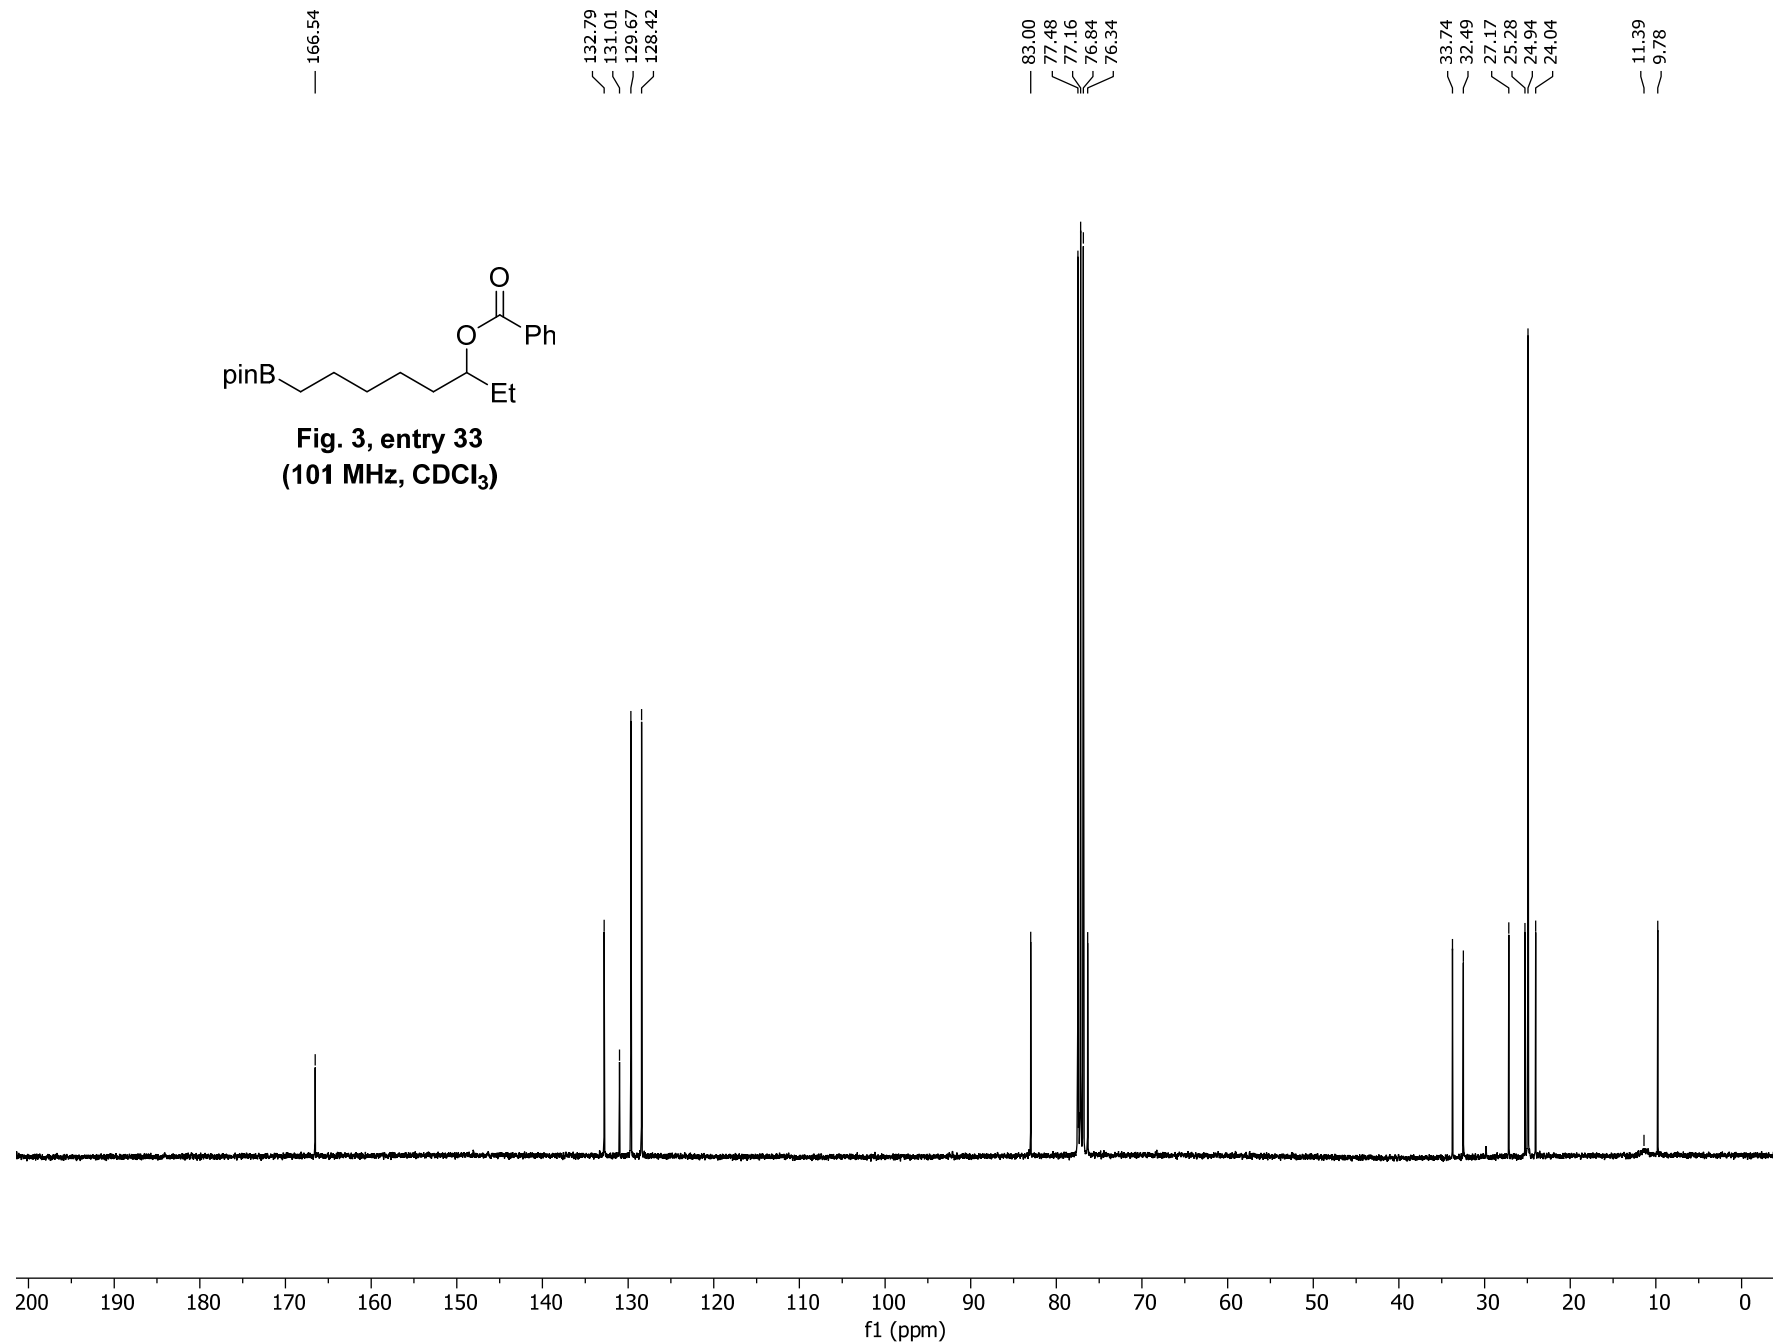

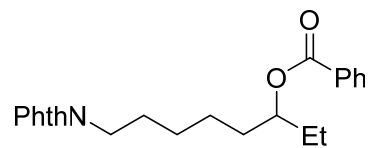

**Fig. 3, entry 34**  
**(400 MHz, CDCl<sub>3</sub>)**

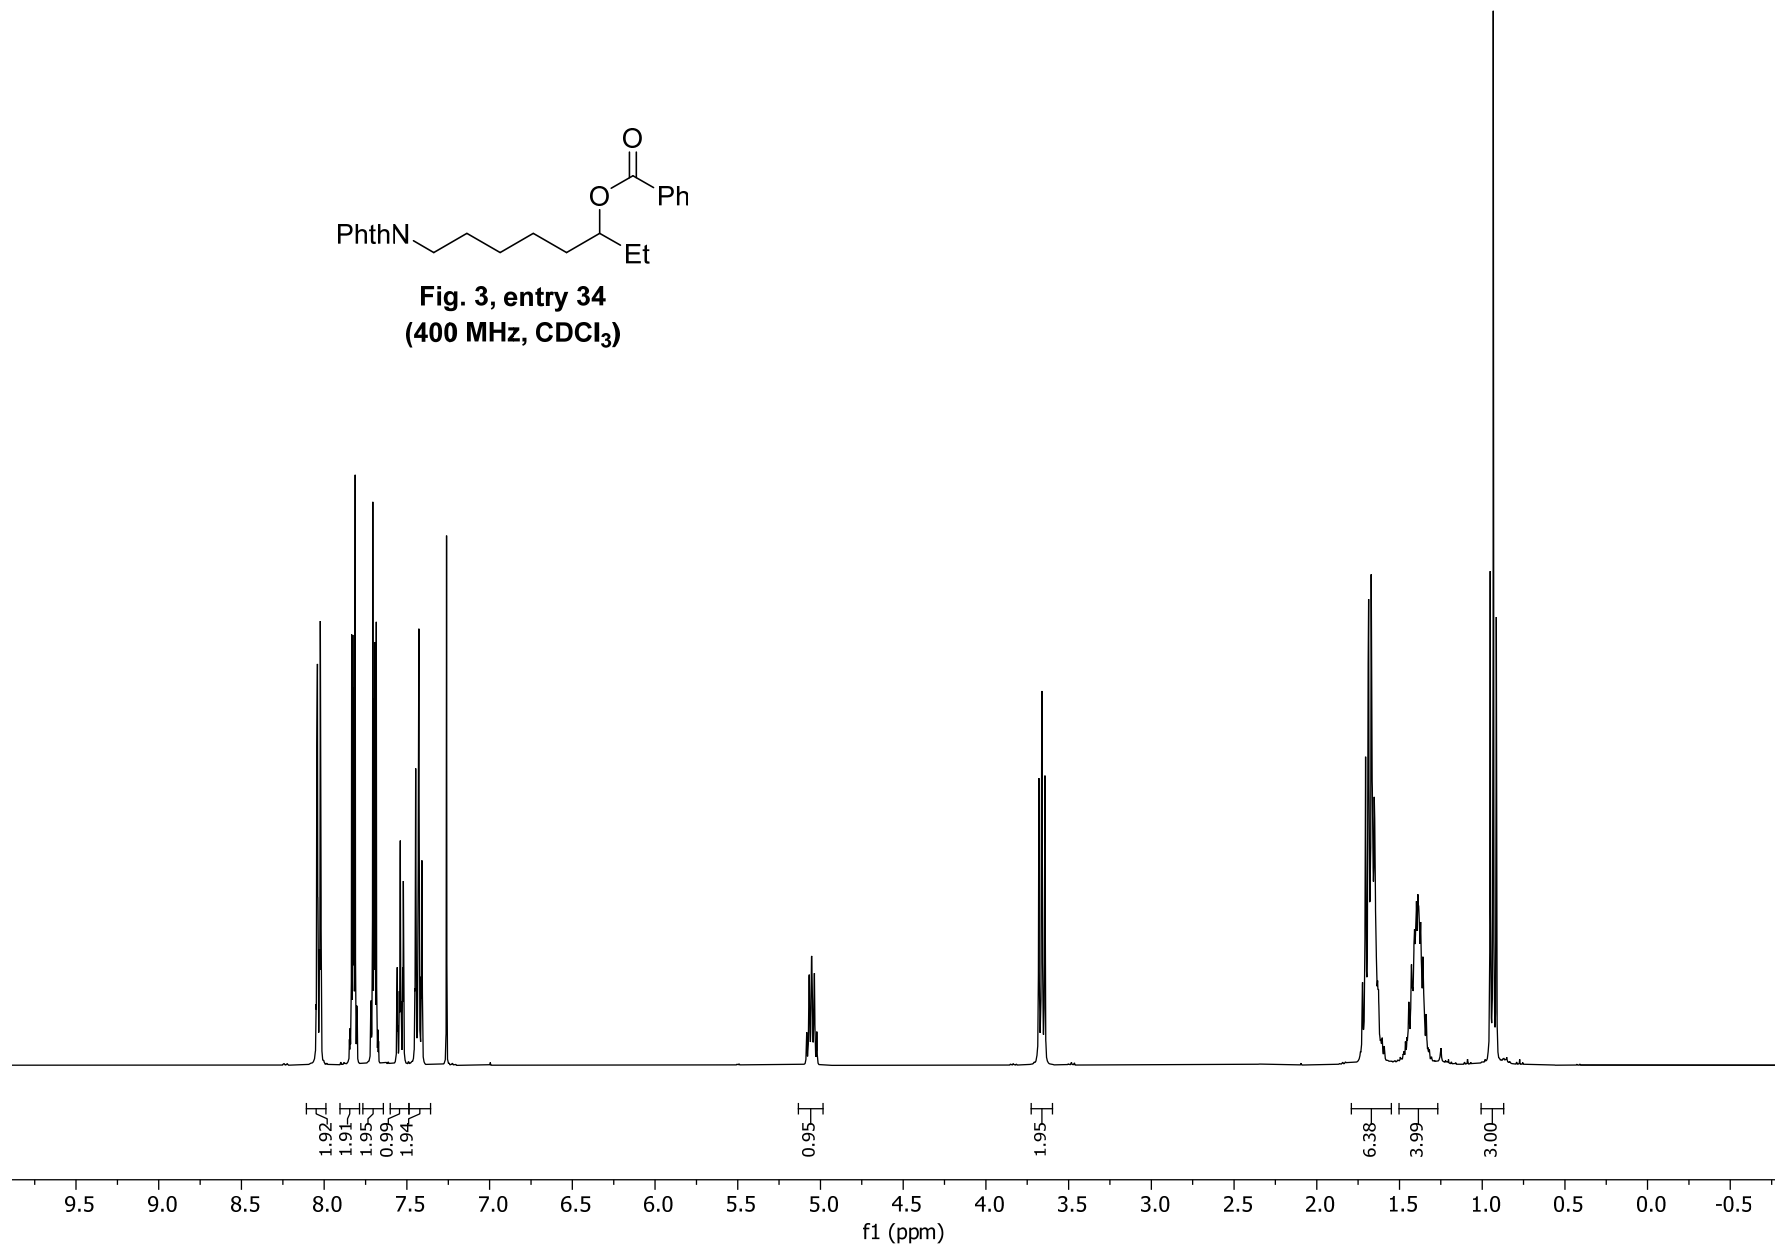



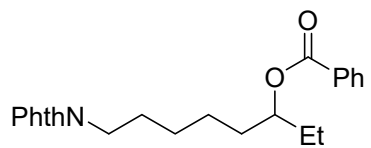

**Fig. 3, entry 34**  
**(101 MHz, CDCl<sub>3</sub>)**

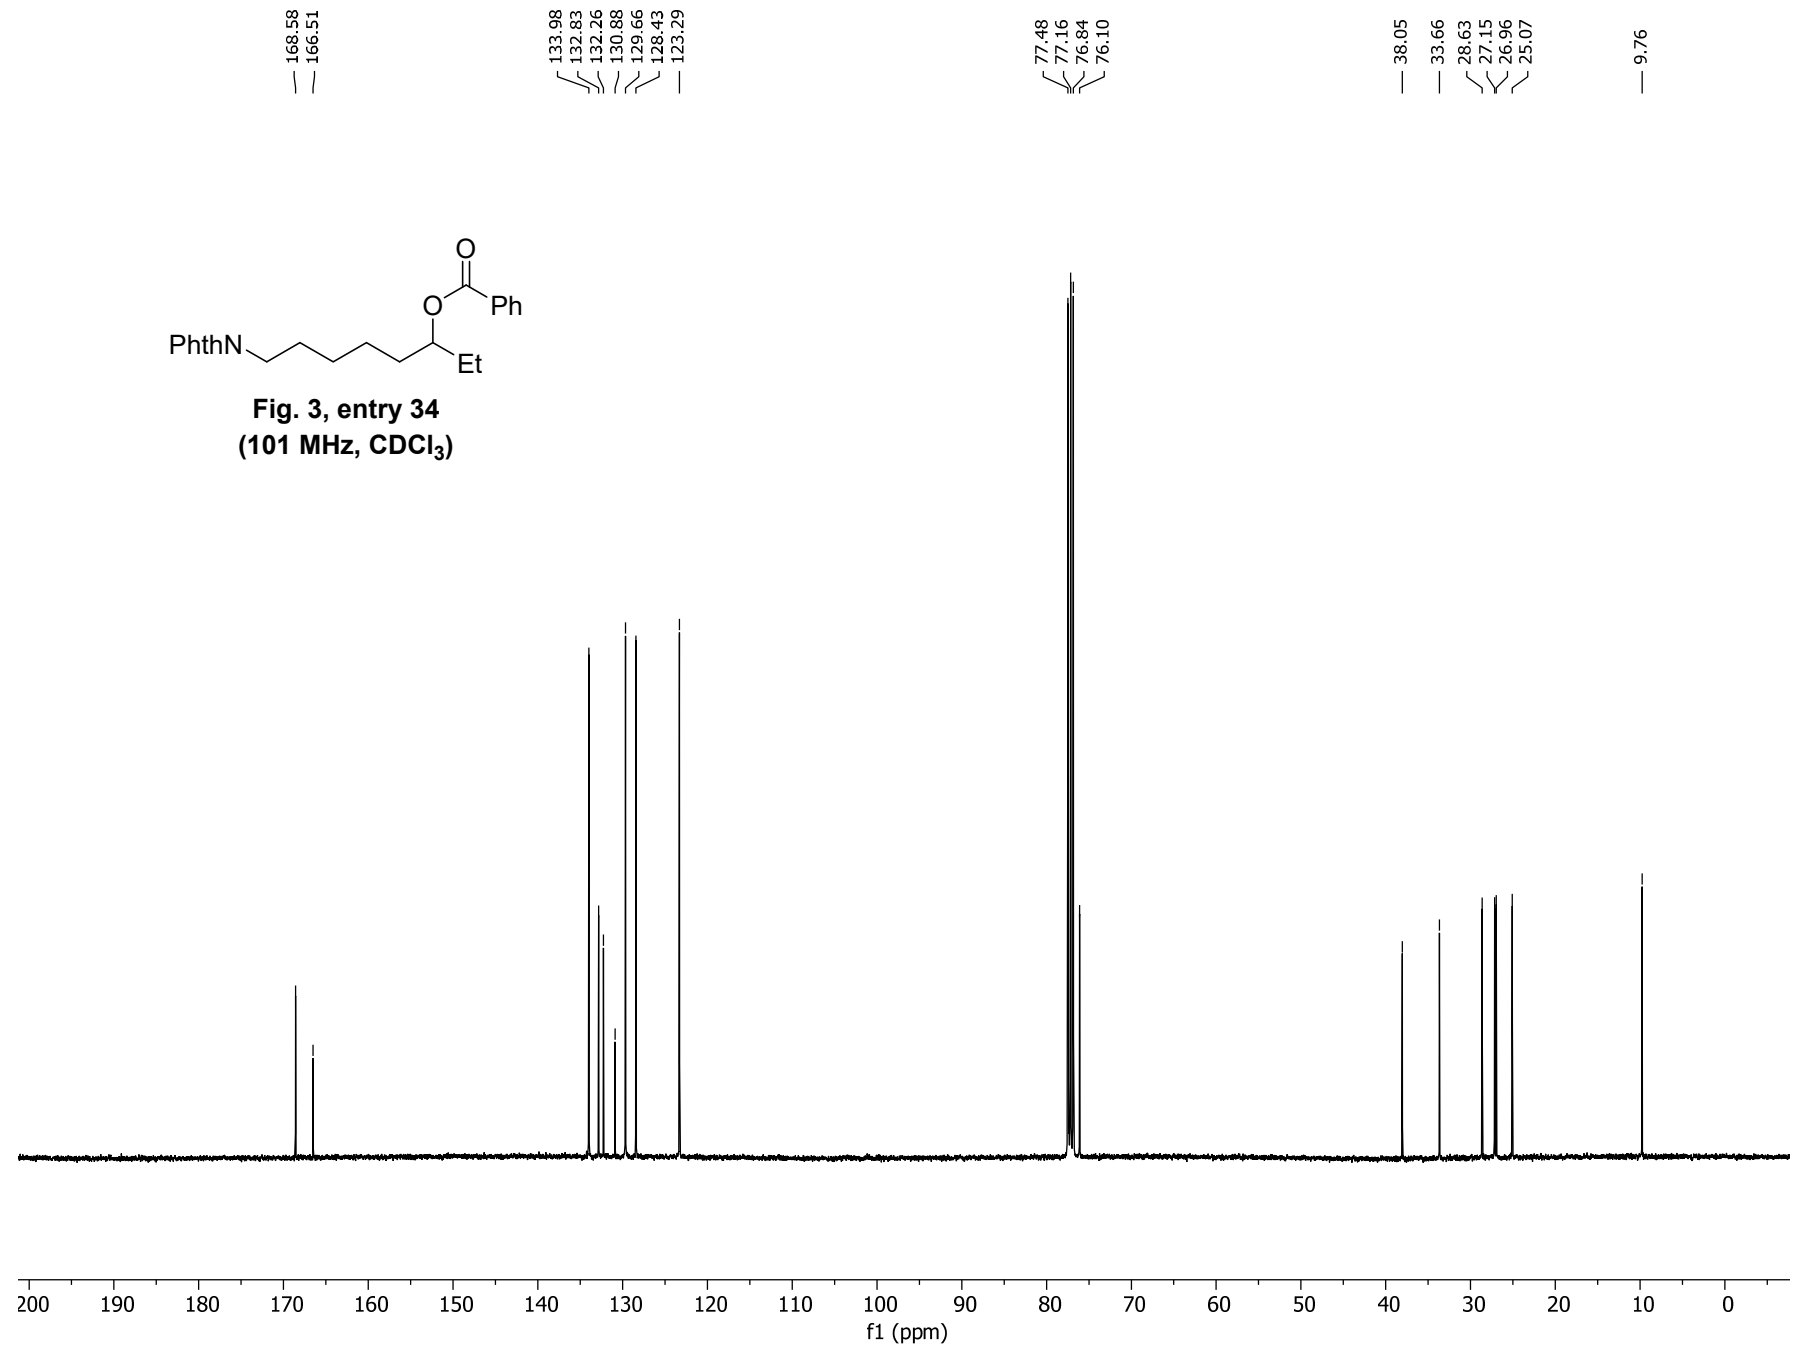

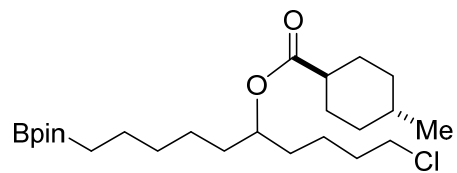

**Fig. 4, entry 38**  
**(400 MHz, CDCl<sub>3</sub>)**

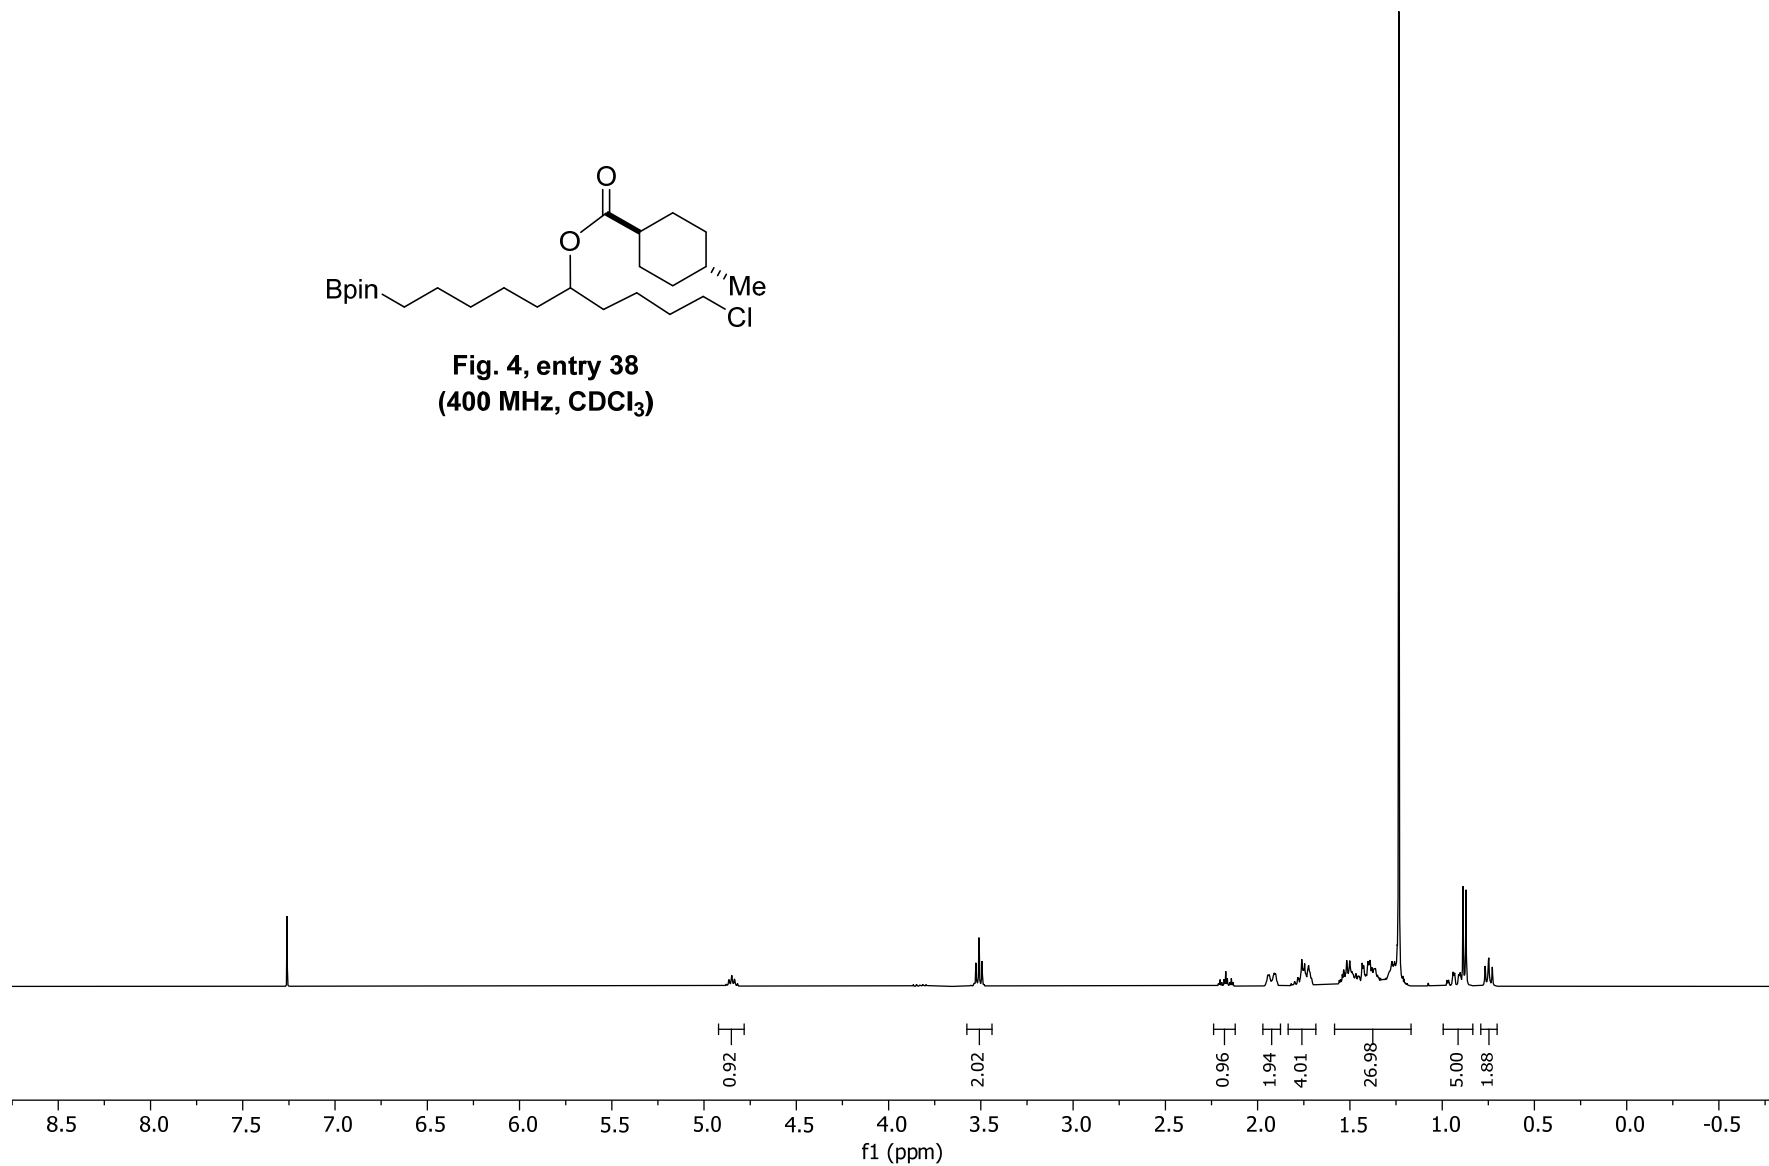

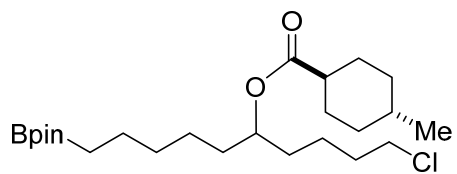

**Fig. 4, entry 38**  
**(101 MHz, CDCl<sub>3</sub>)**

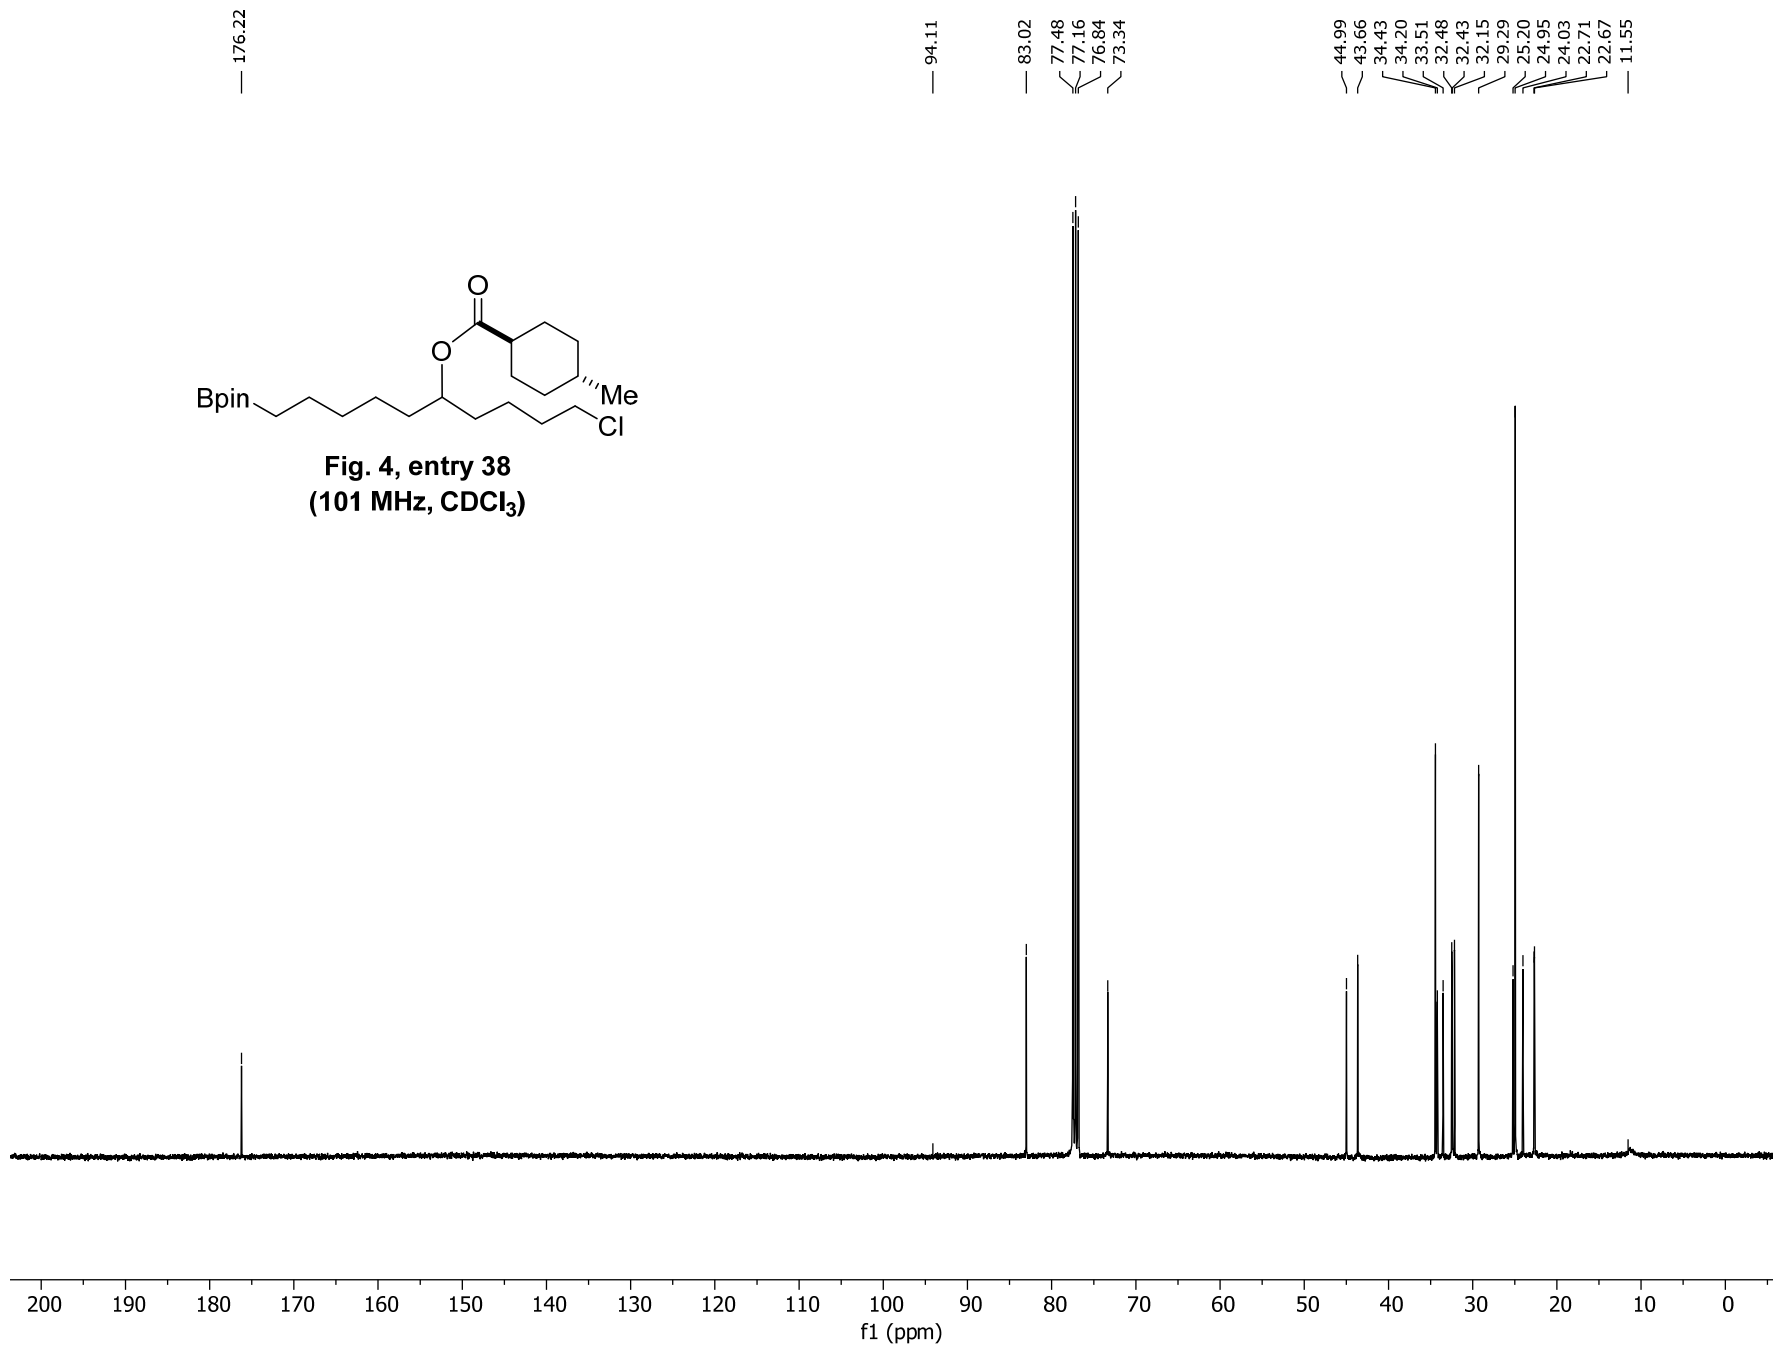

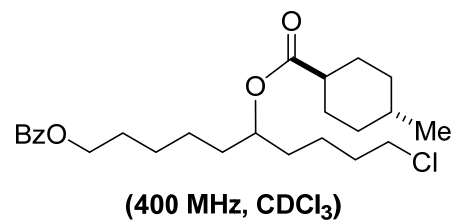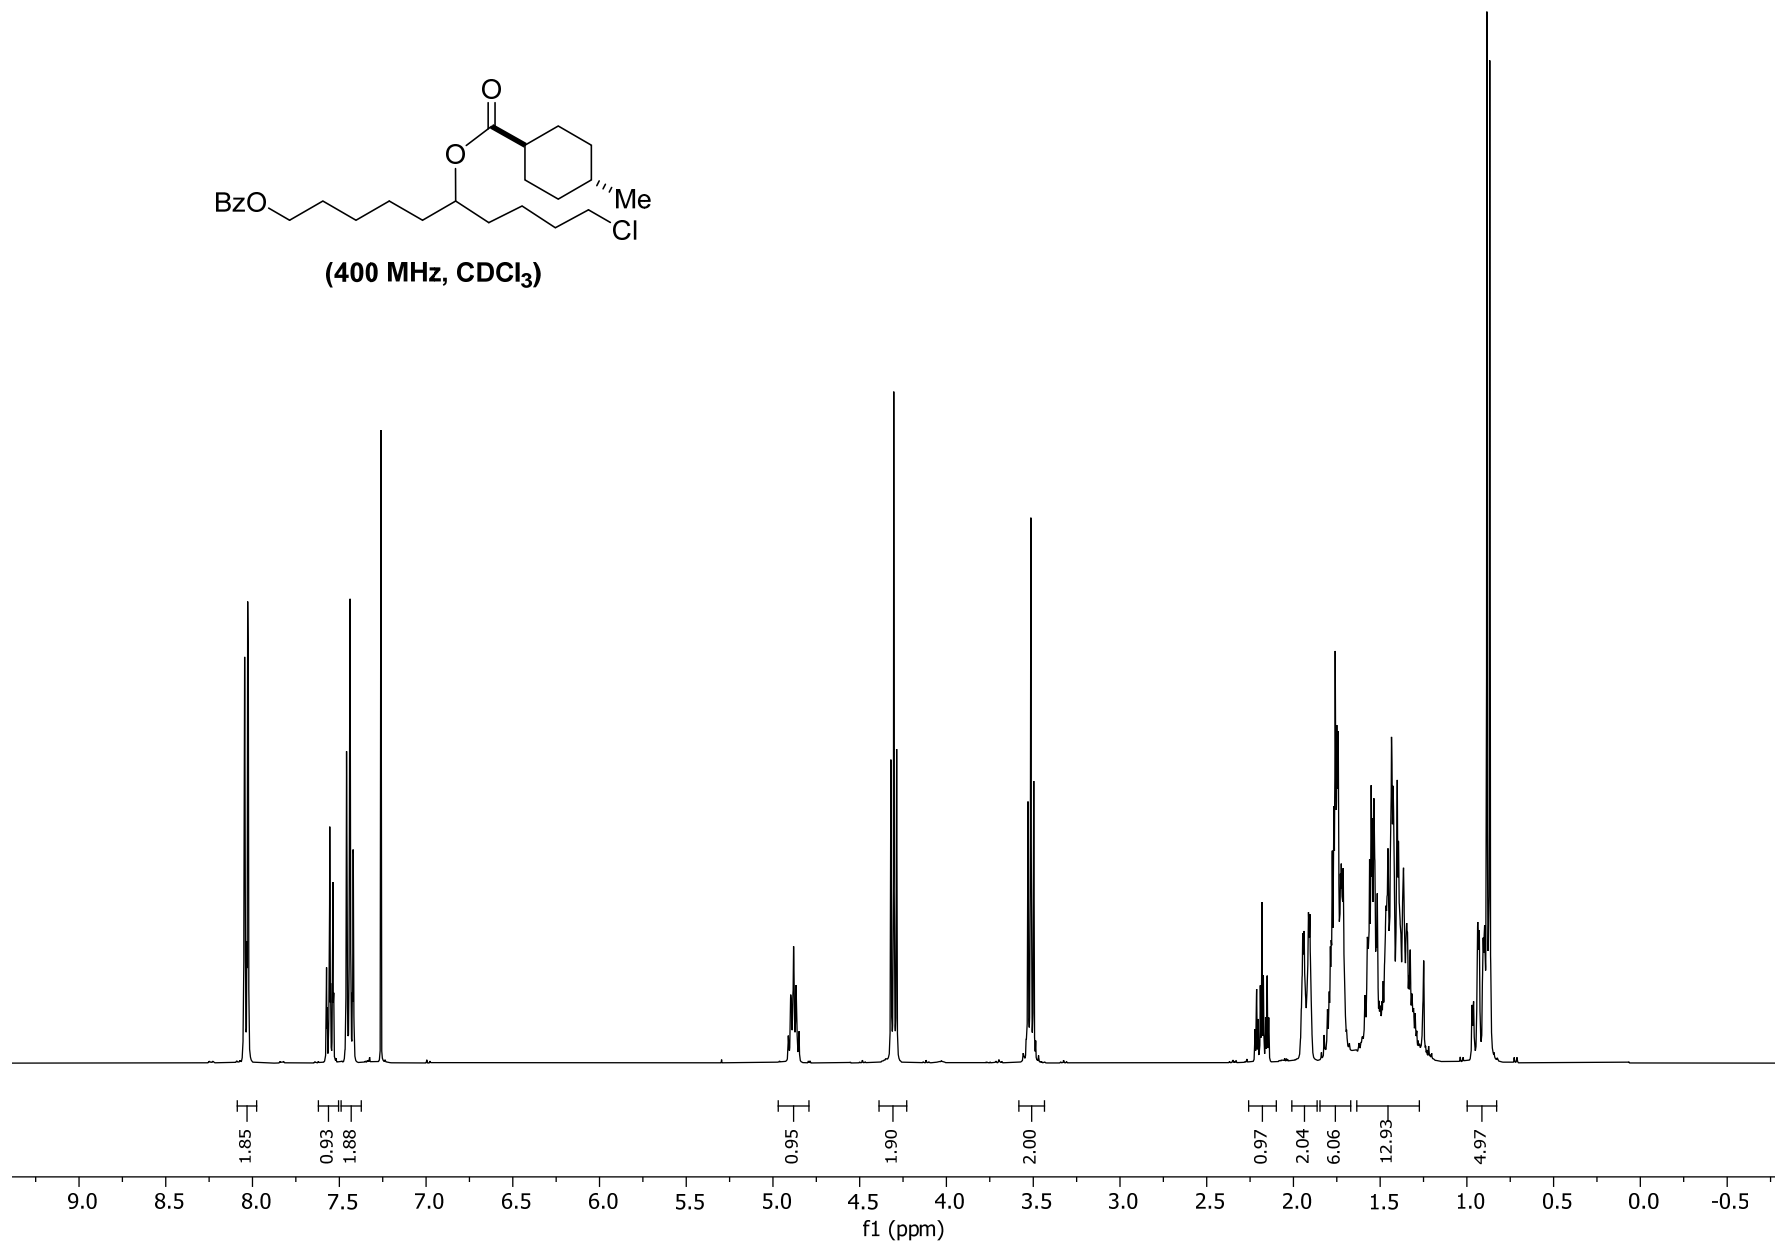

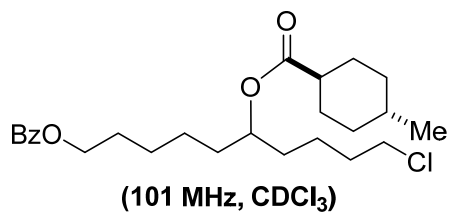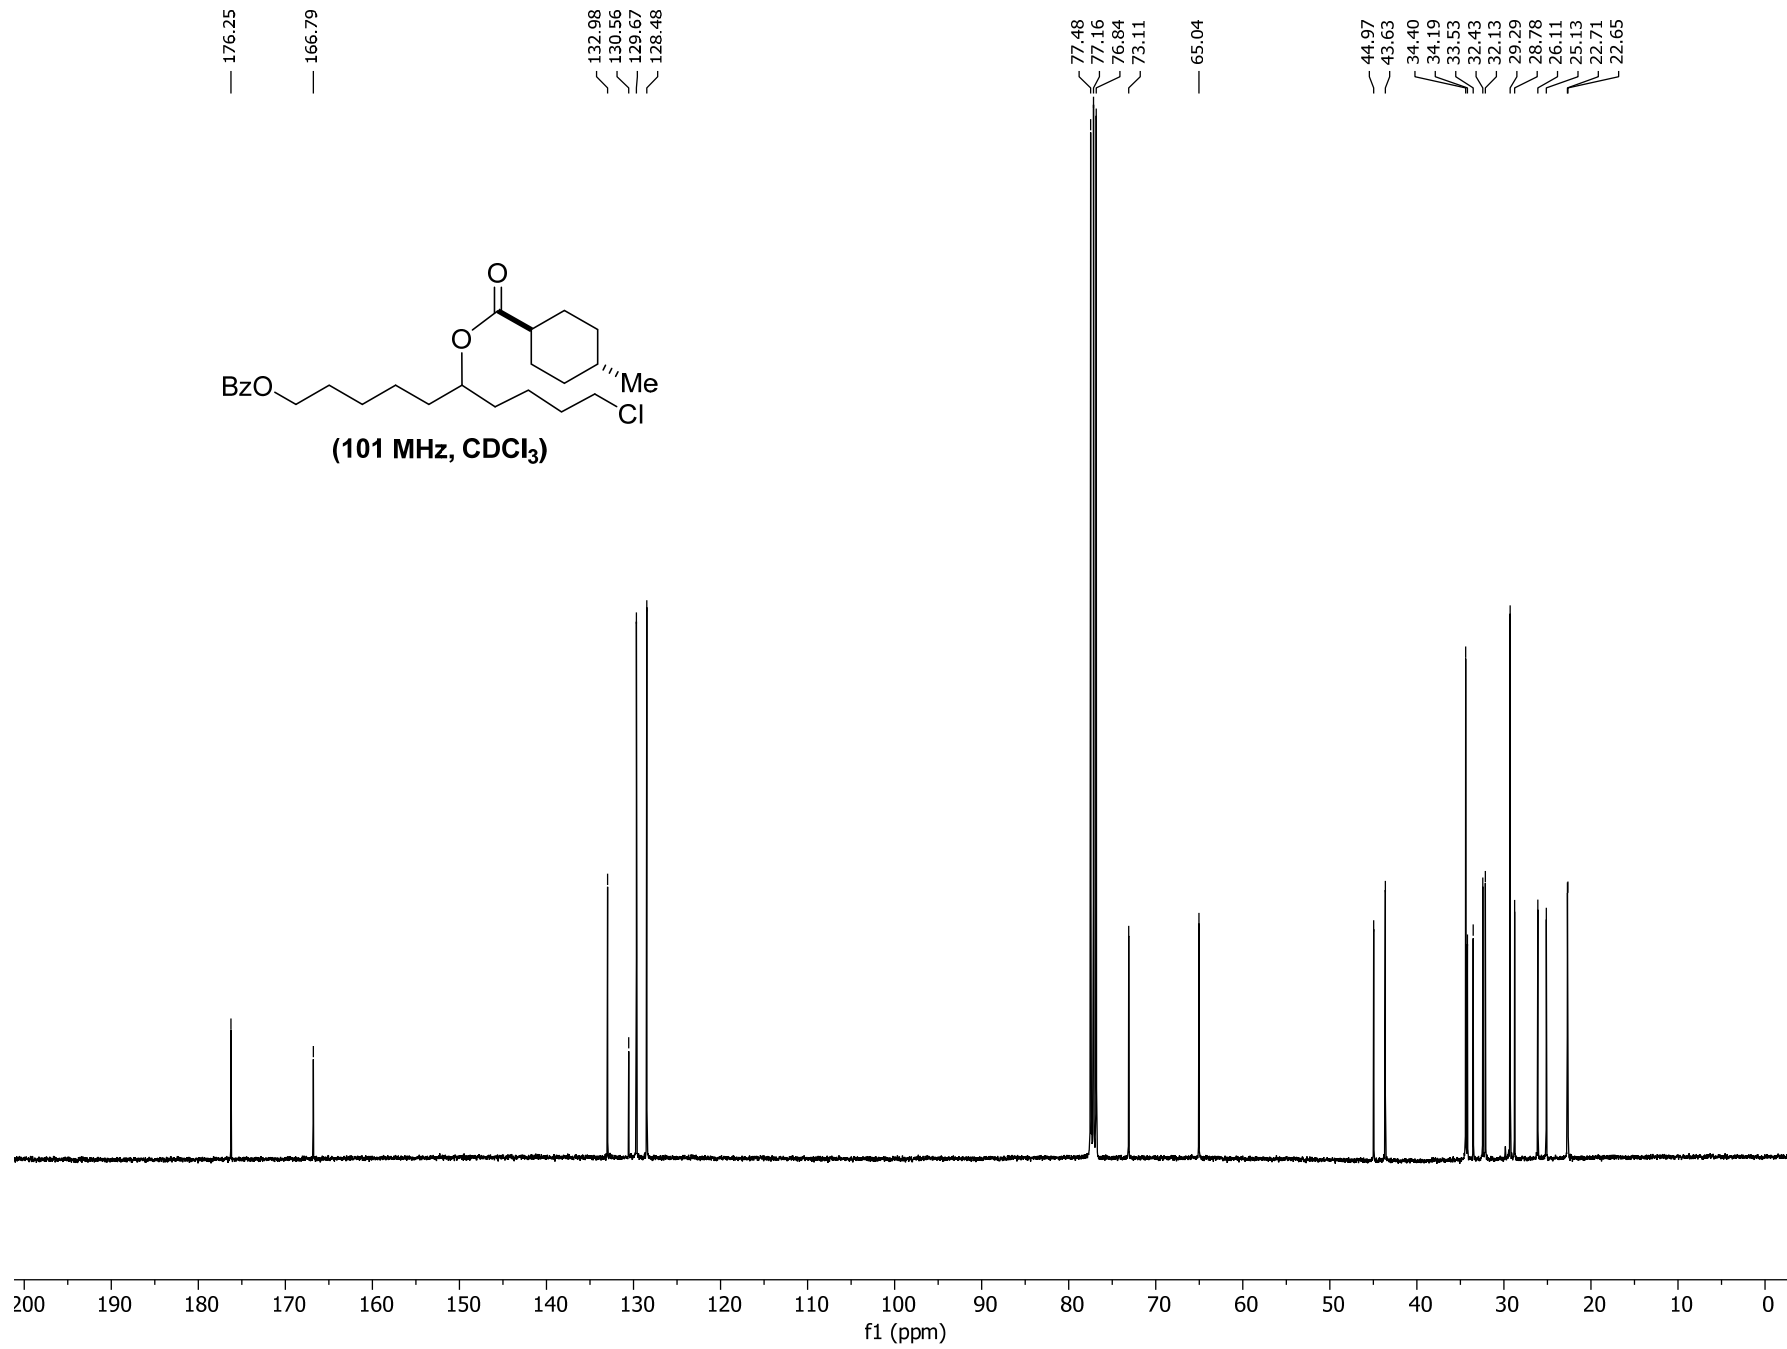

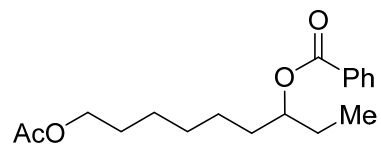

**Fig. 4, entry 39**  
**(400 MHz, CDCl<sub>3</sub>)**

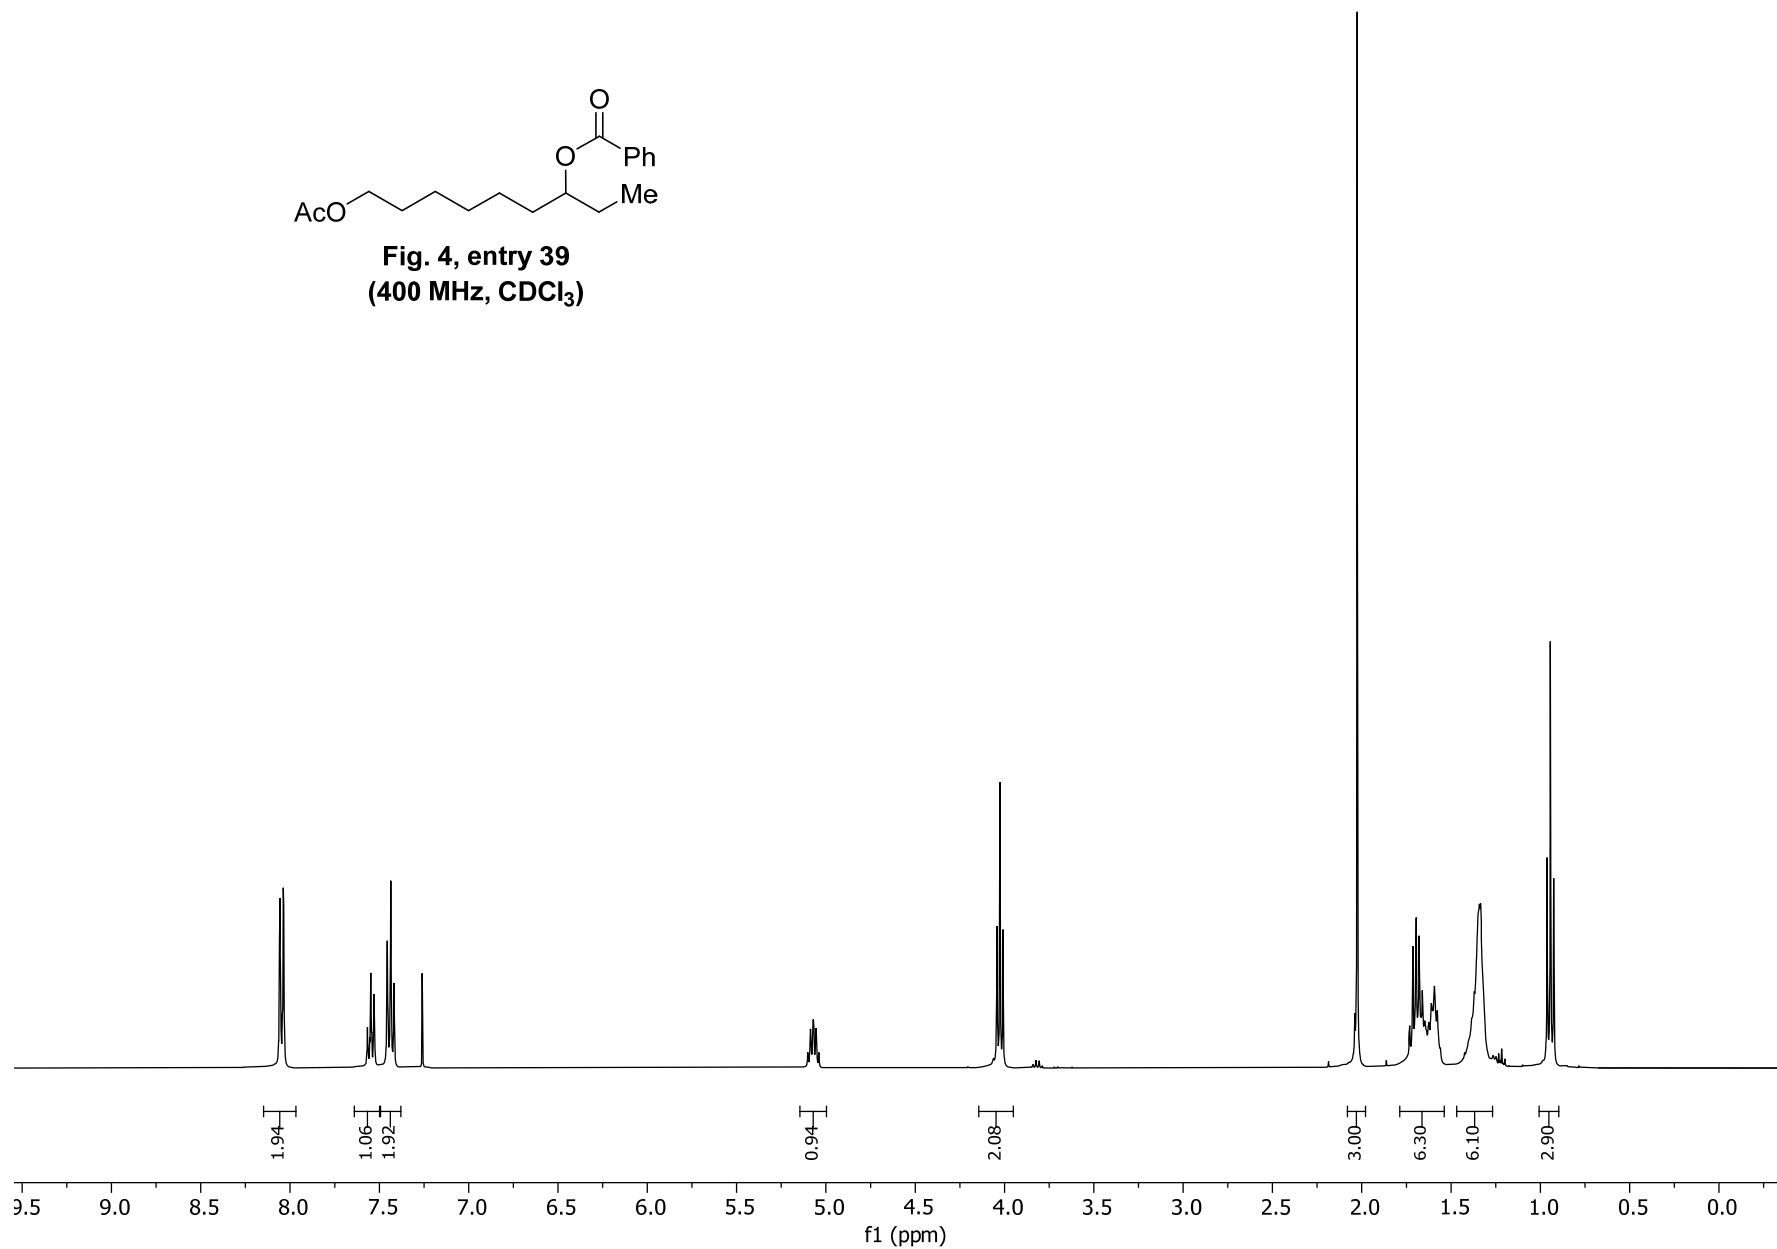

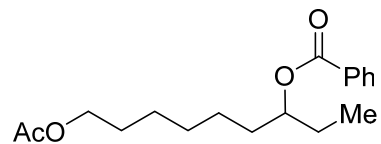

Fig. 4, entry 39  
(101 MHz, CDCl<sub>3</sub>)

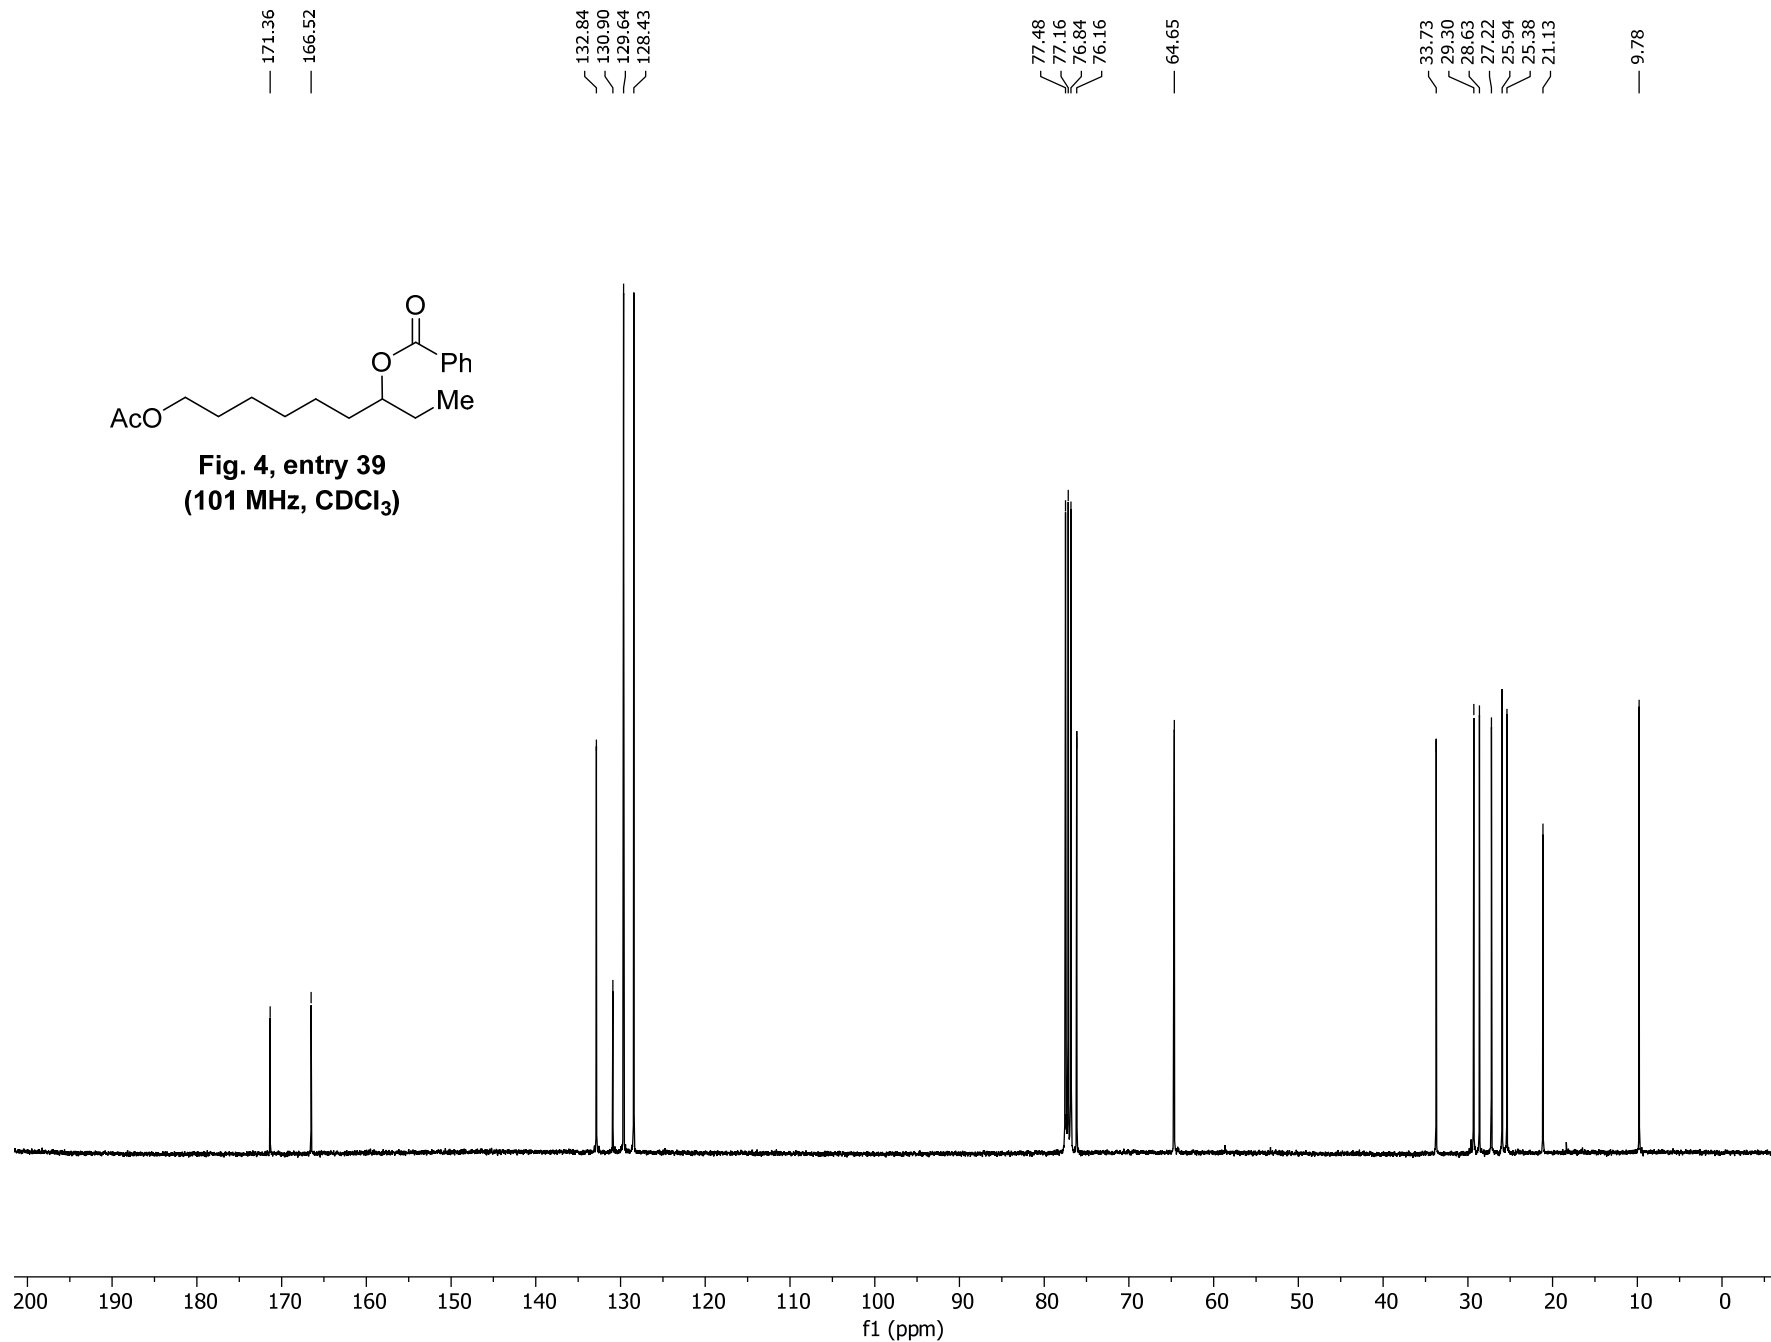

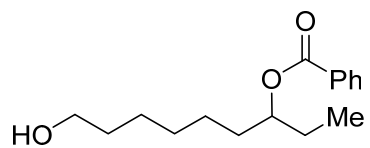

**Fig. 4, entry 40**  
**(400 MHz, CDCl<sub>3</sub>)**

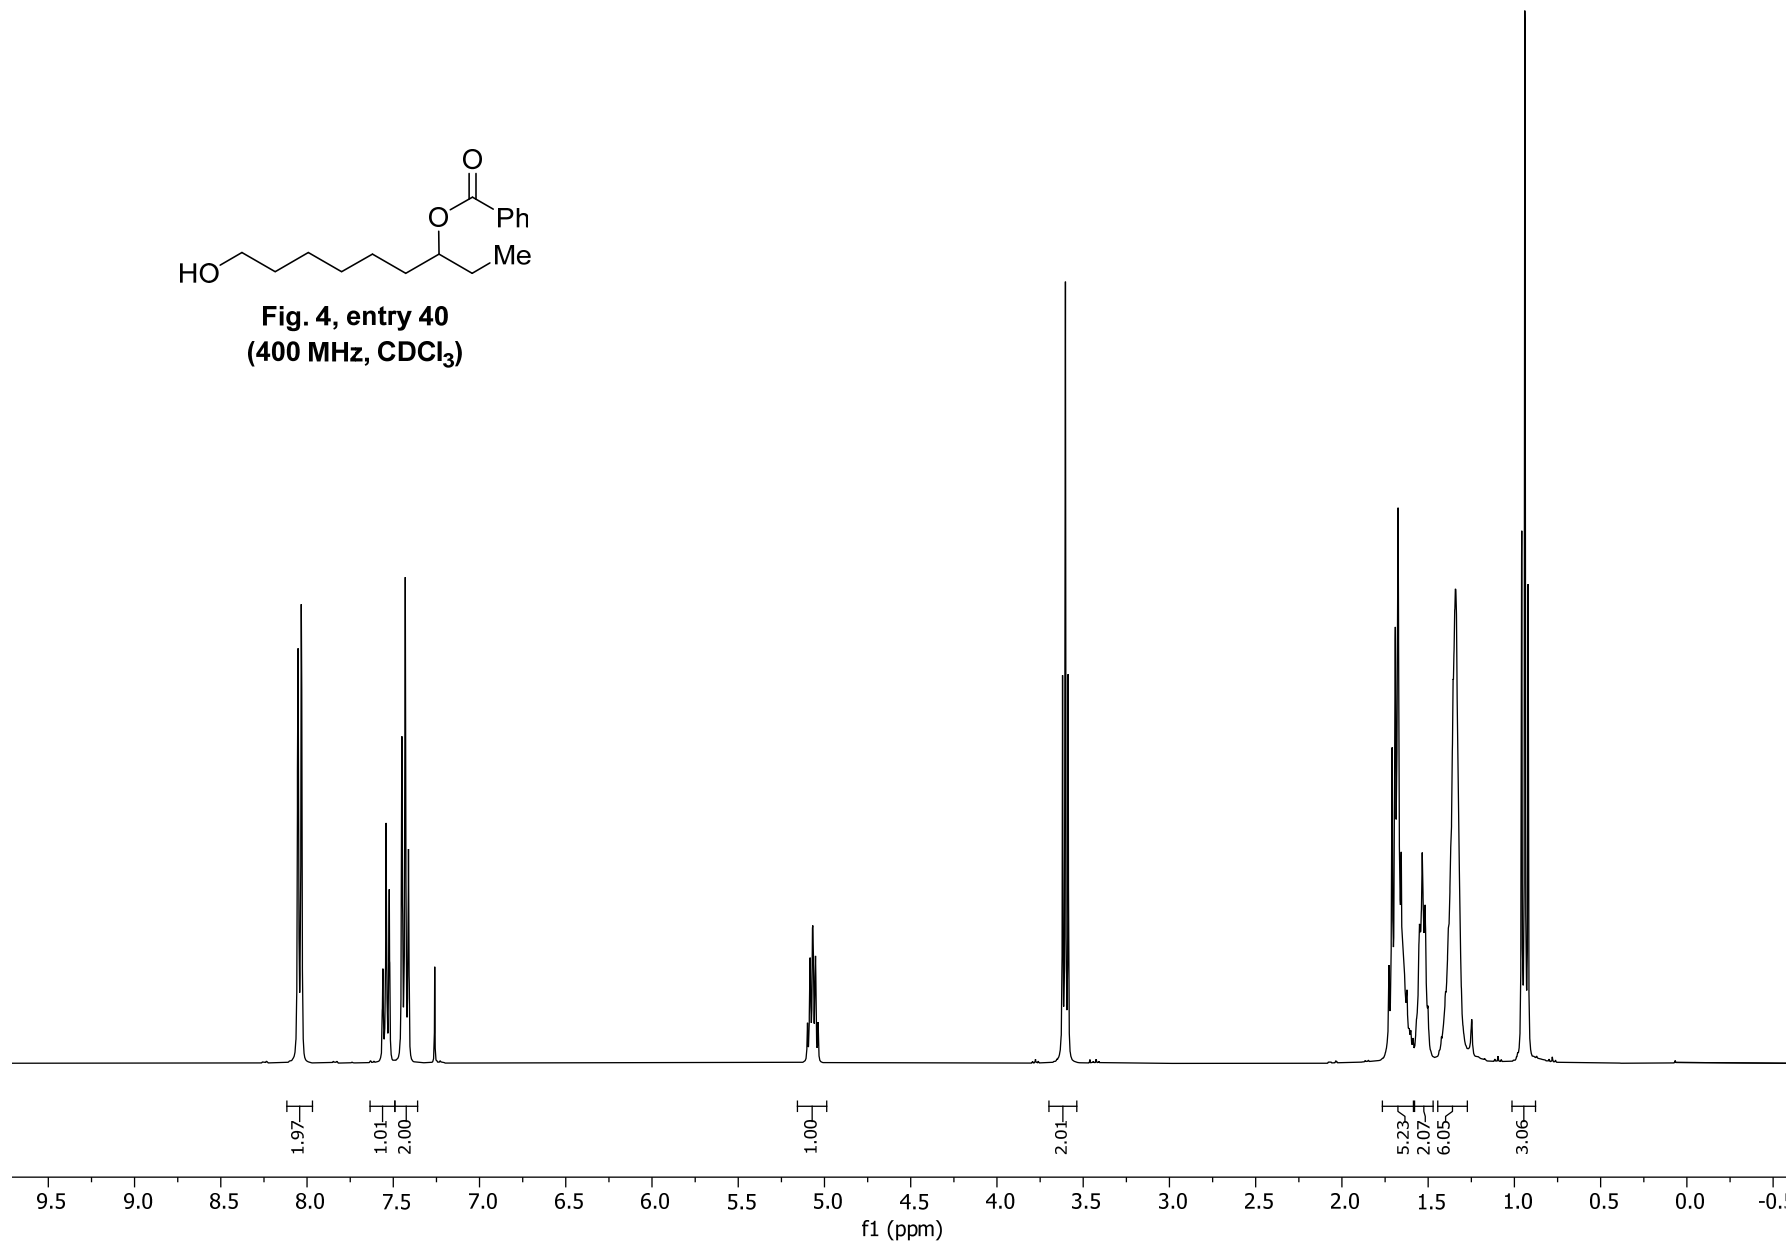



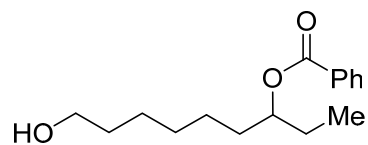

Fig. 4, entry 40  
(101 MHz, CDCl<sub>3</sub>)

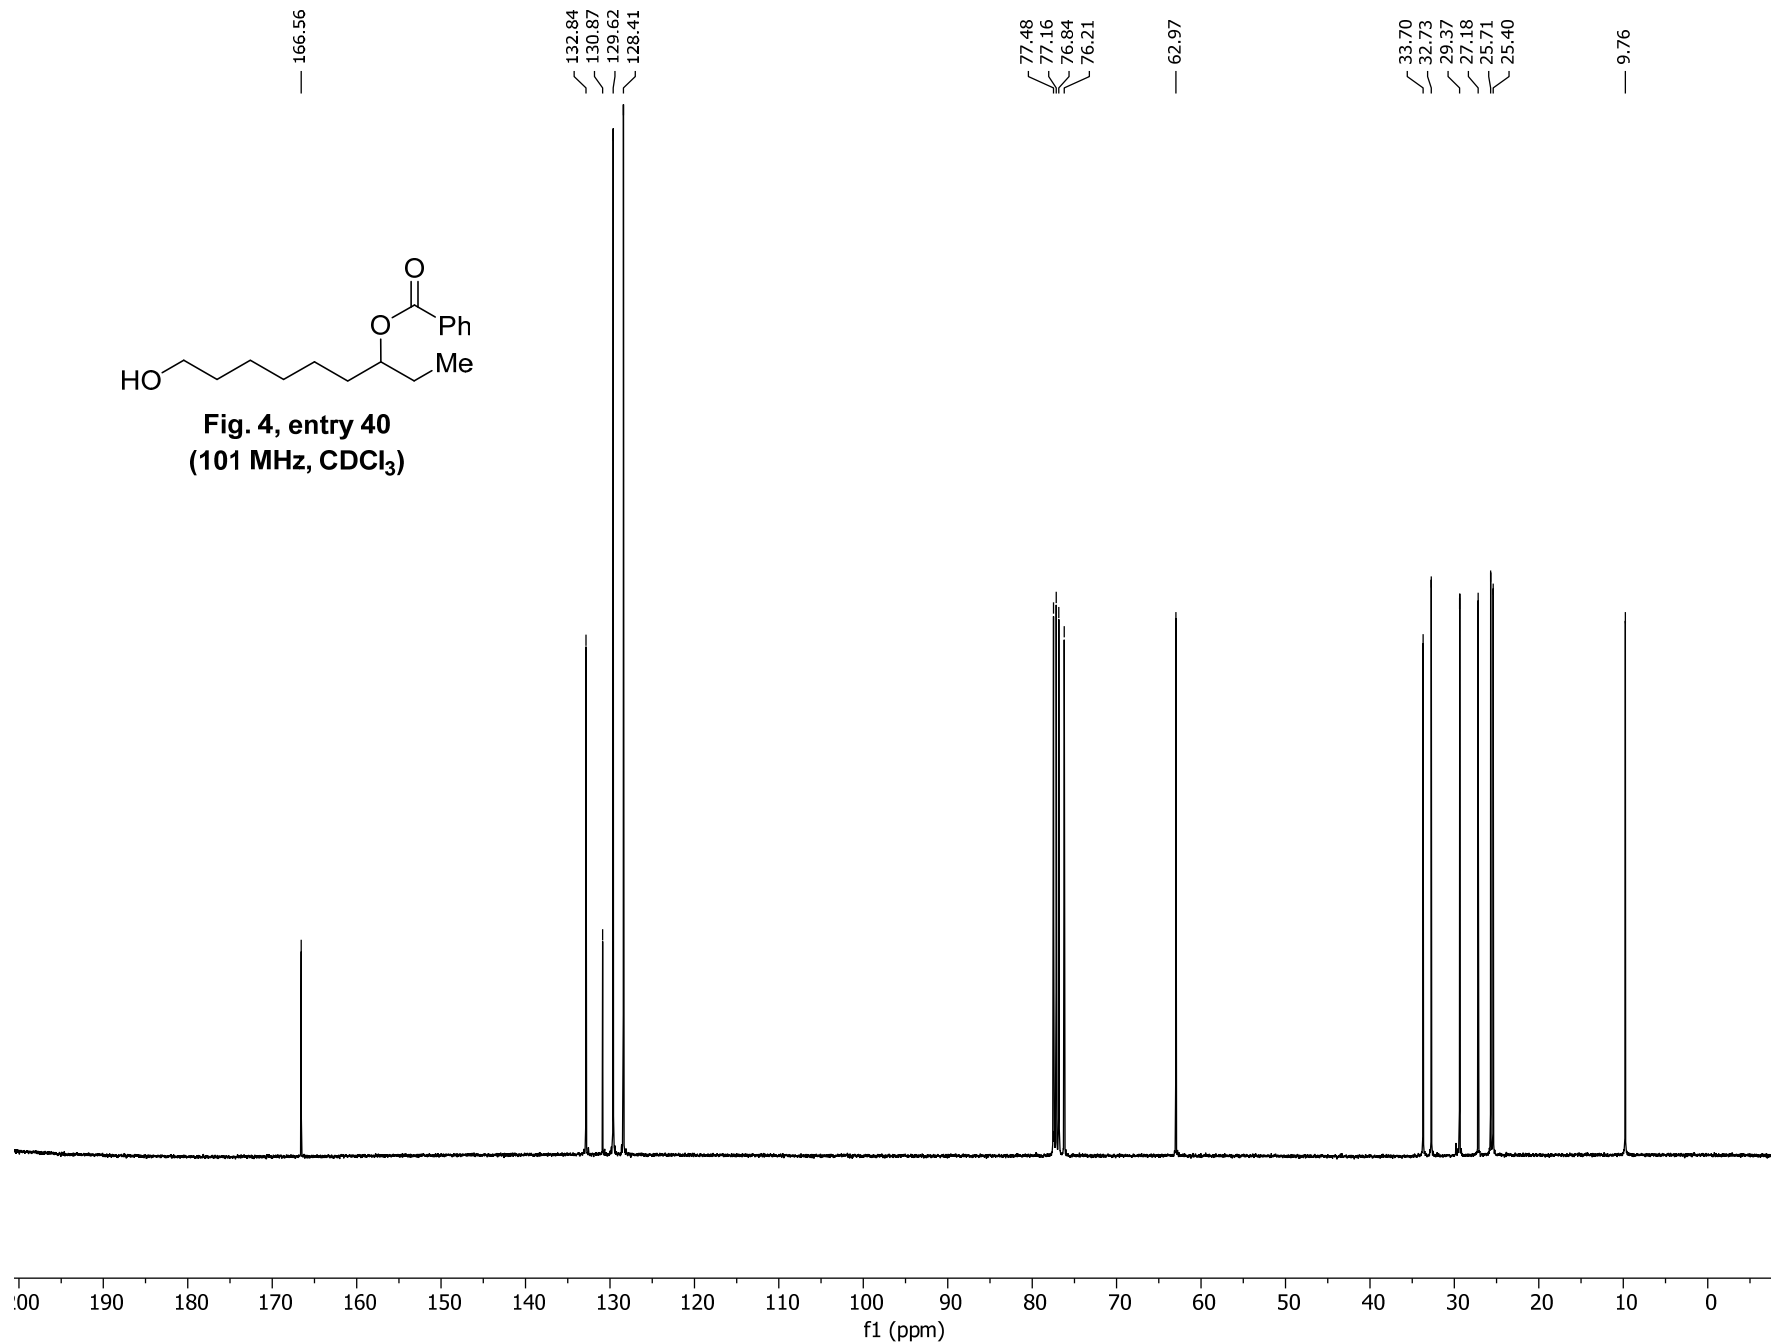

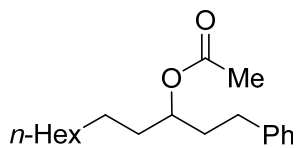

**Fig. 4, entry 41**  
**(400 MHz, CDCl<sub>3</sub>)**

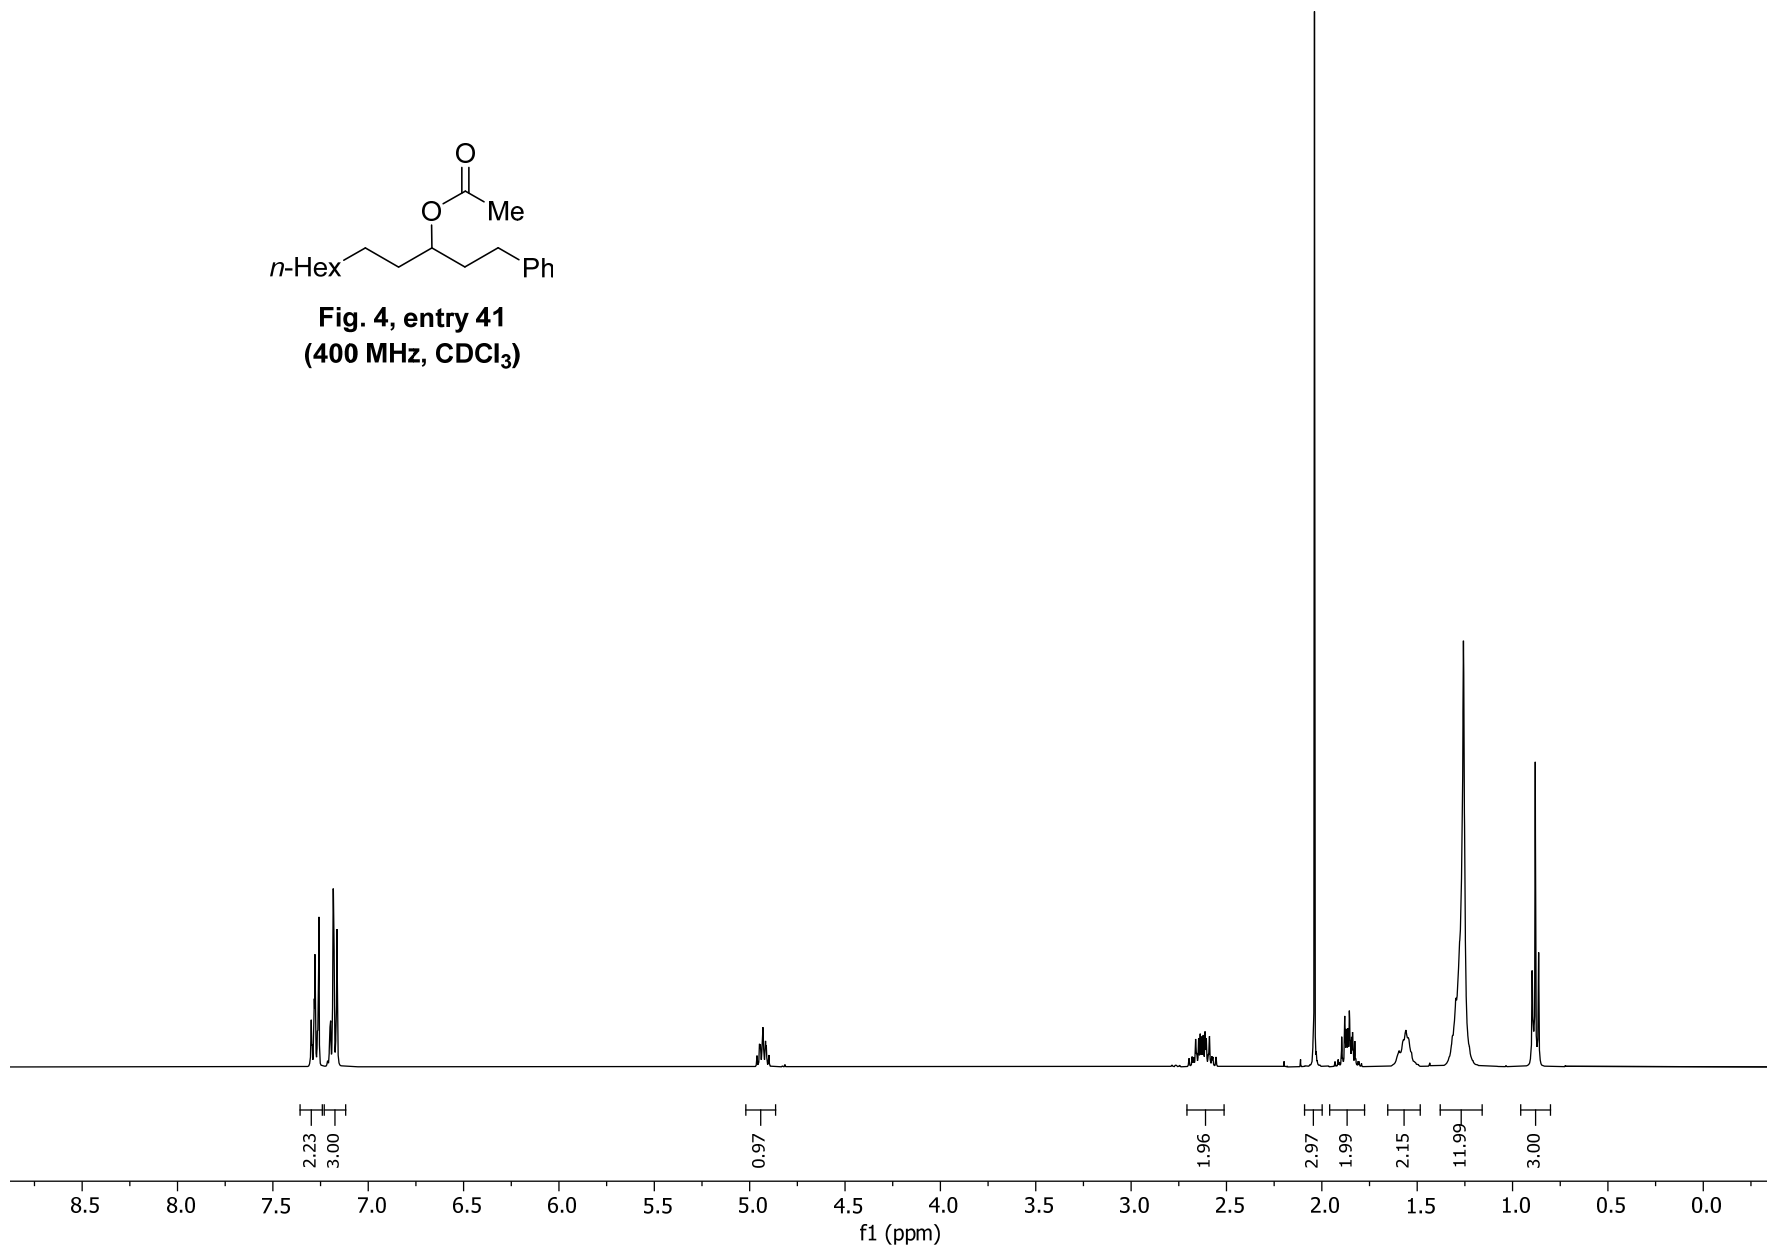

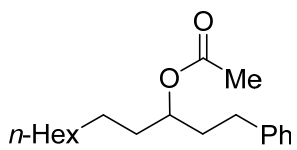

**Fig. 4, entry 41**  
**(101 MHz, CDCl<sub>3</sub>)**

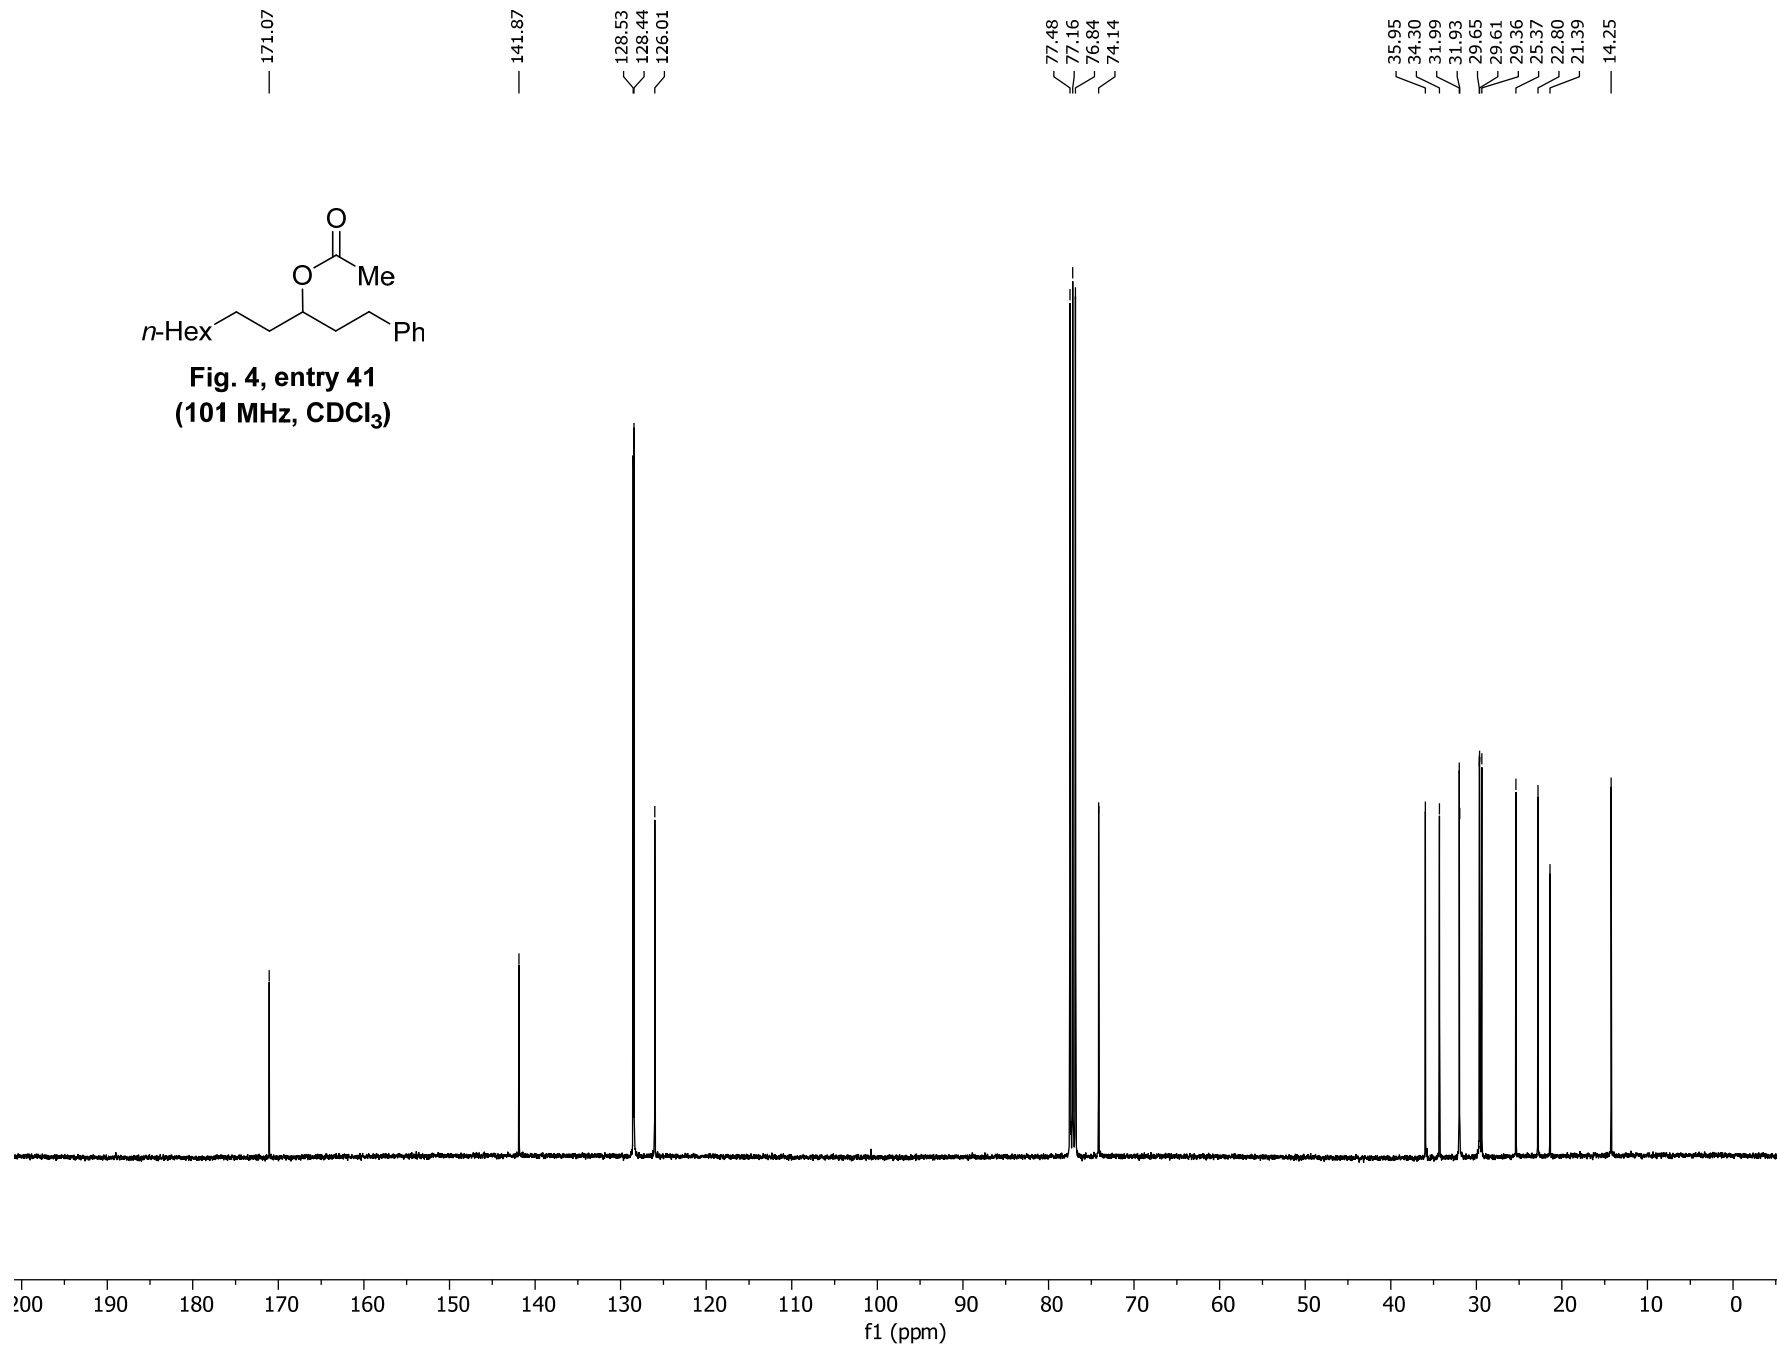

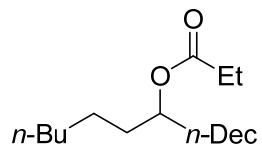

**Fig. 4, entry 42**  
(400 MHz, CDCl<sub>3</sub>)

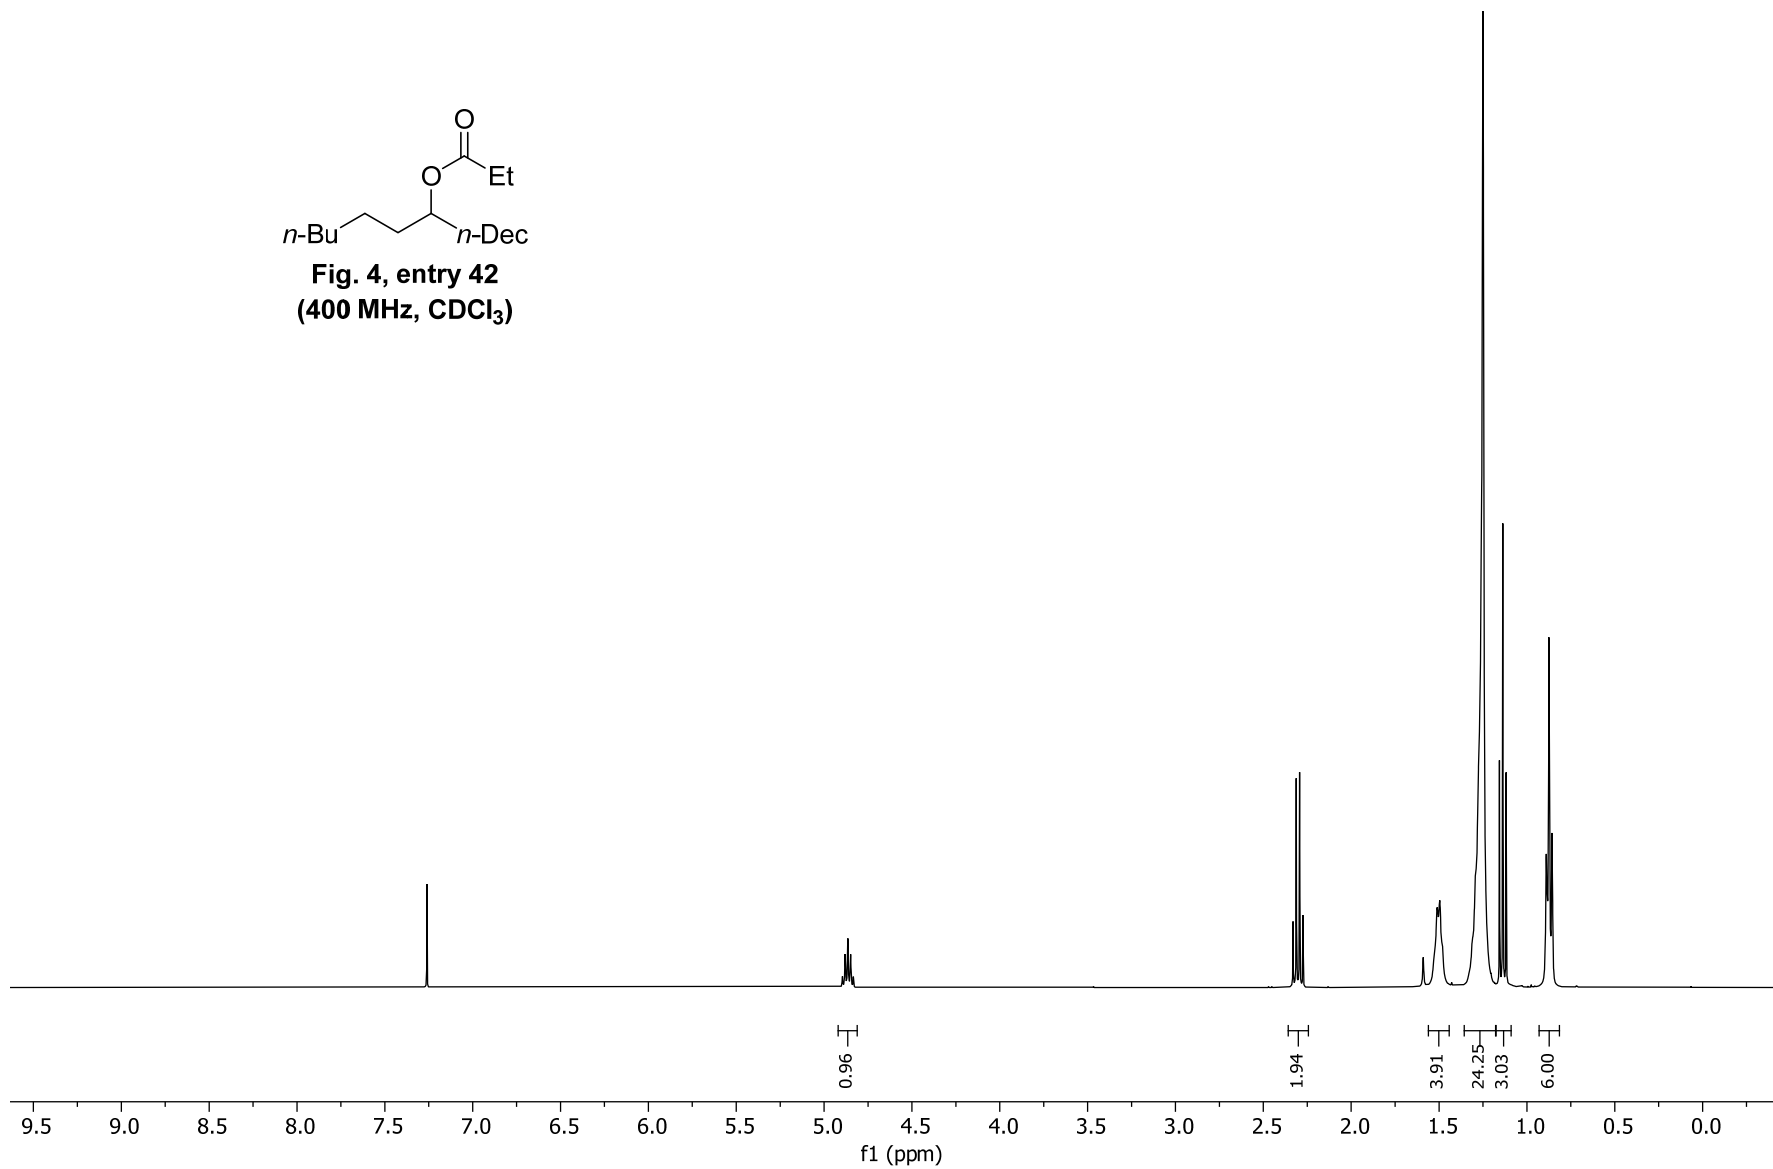

— 174.49

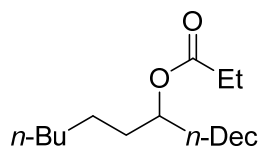

**Fig. 4, entry 42**  
(101 MHz, CDCl<sub>3</sub>)

77.48  
77.16  
76.84  
74.32

34.30  
32.05  
31.89  
29.75  
29.72  
29.69  
29.48  
29.36  
28.09  
25.45  
25.42  
22.83  
22.73  
14.26  
14.21  
9.49

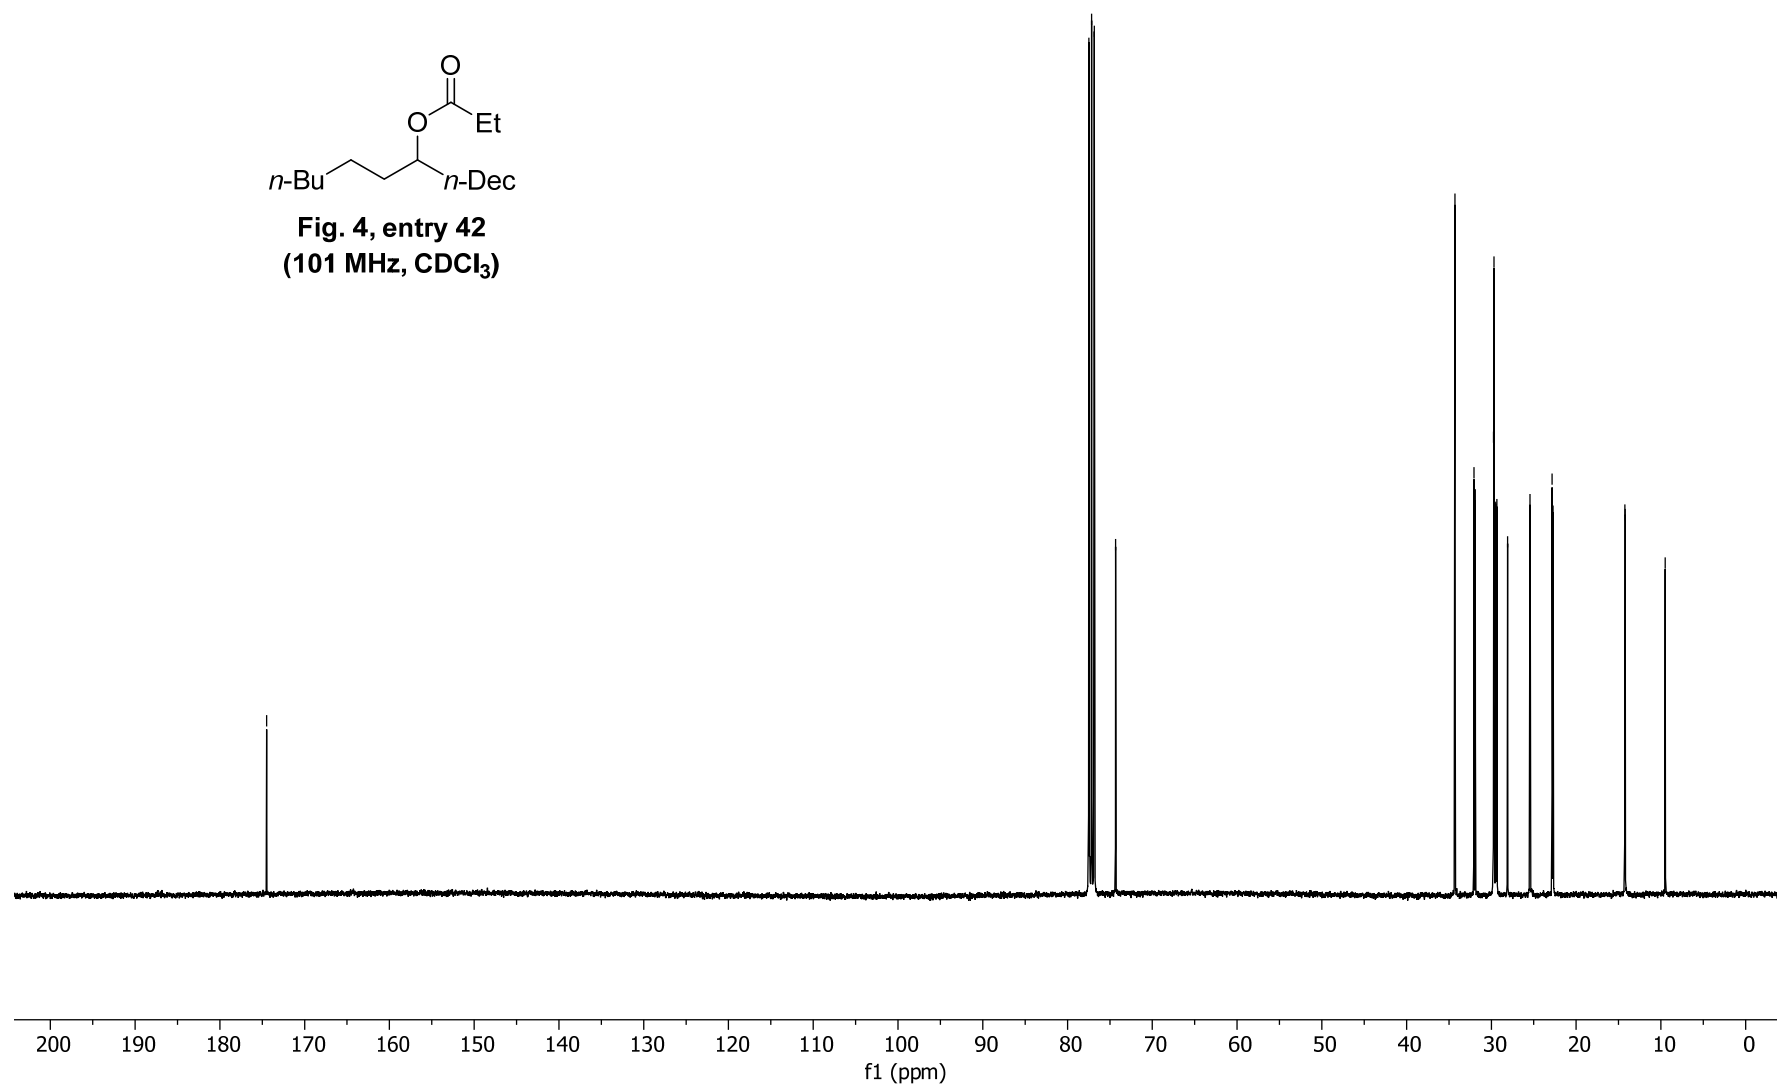

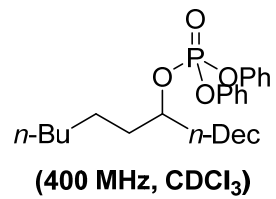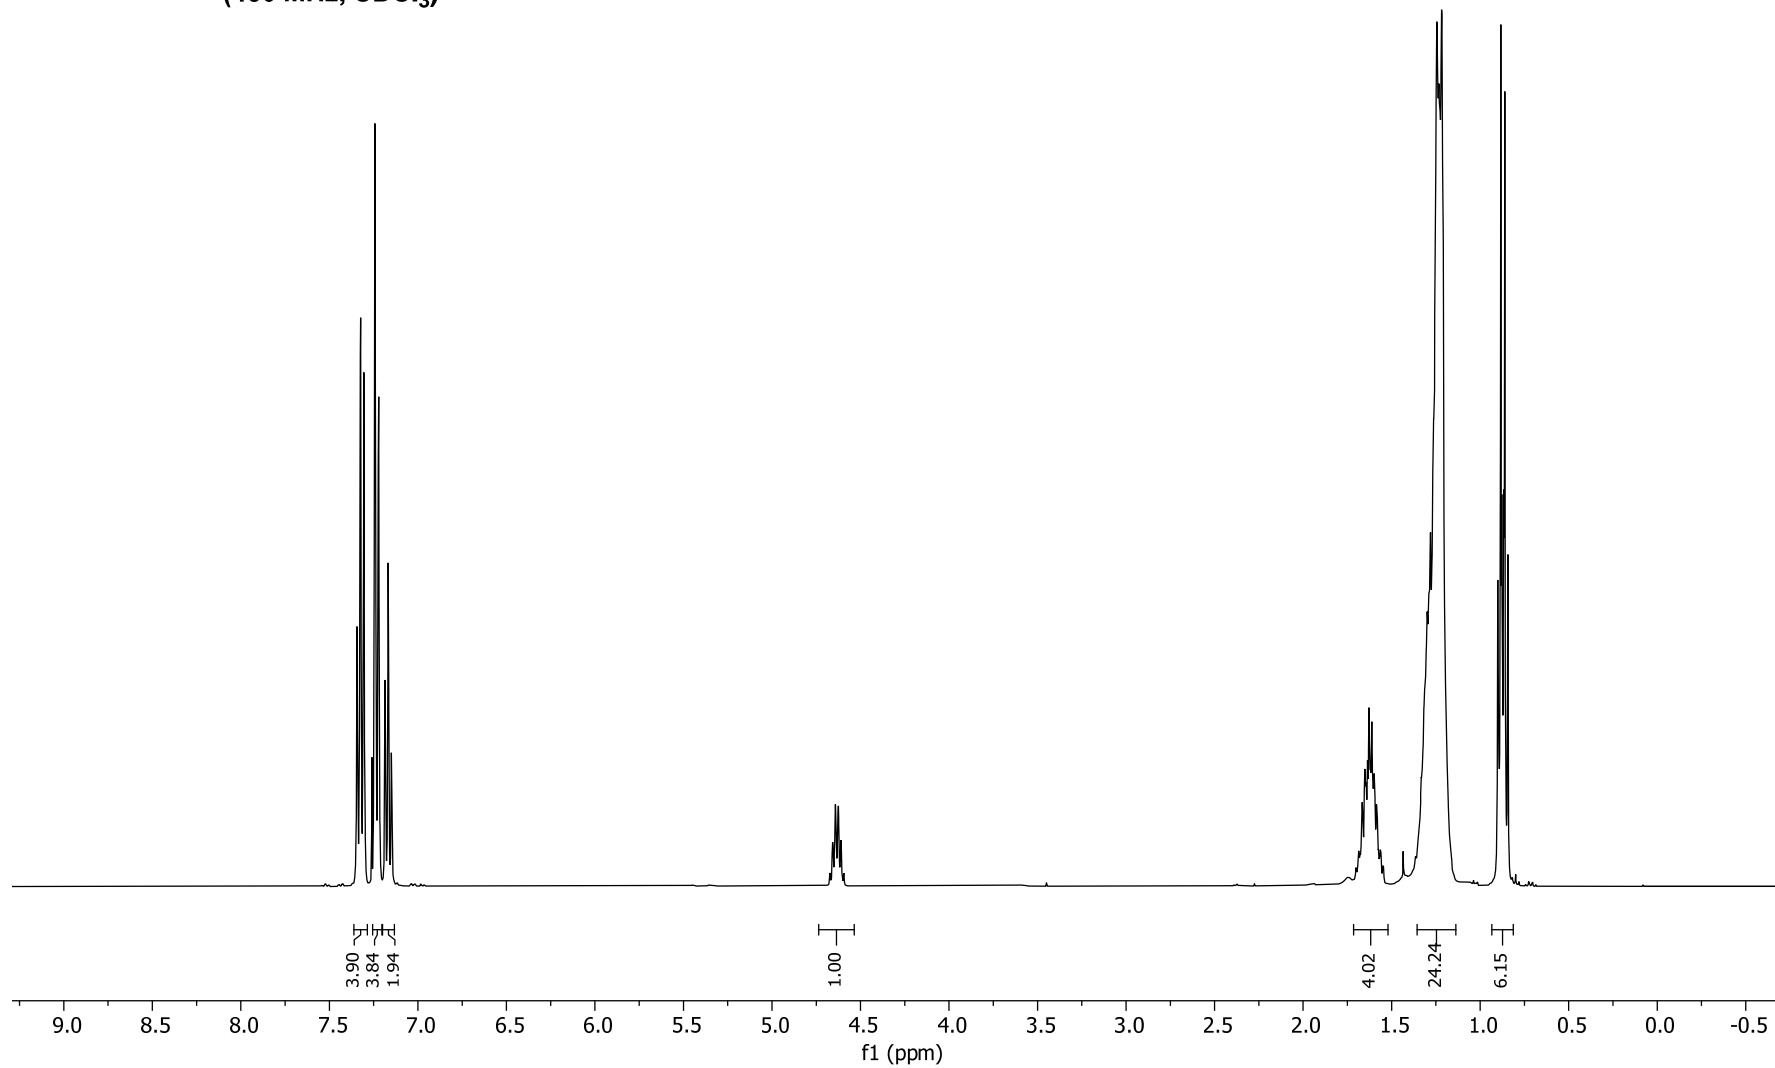

S-166

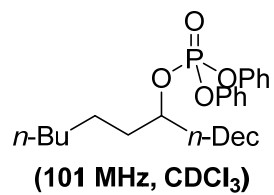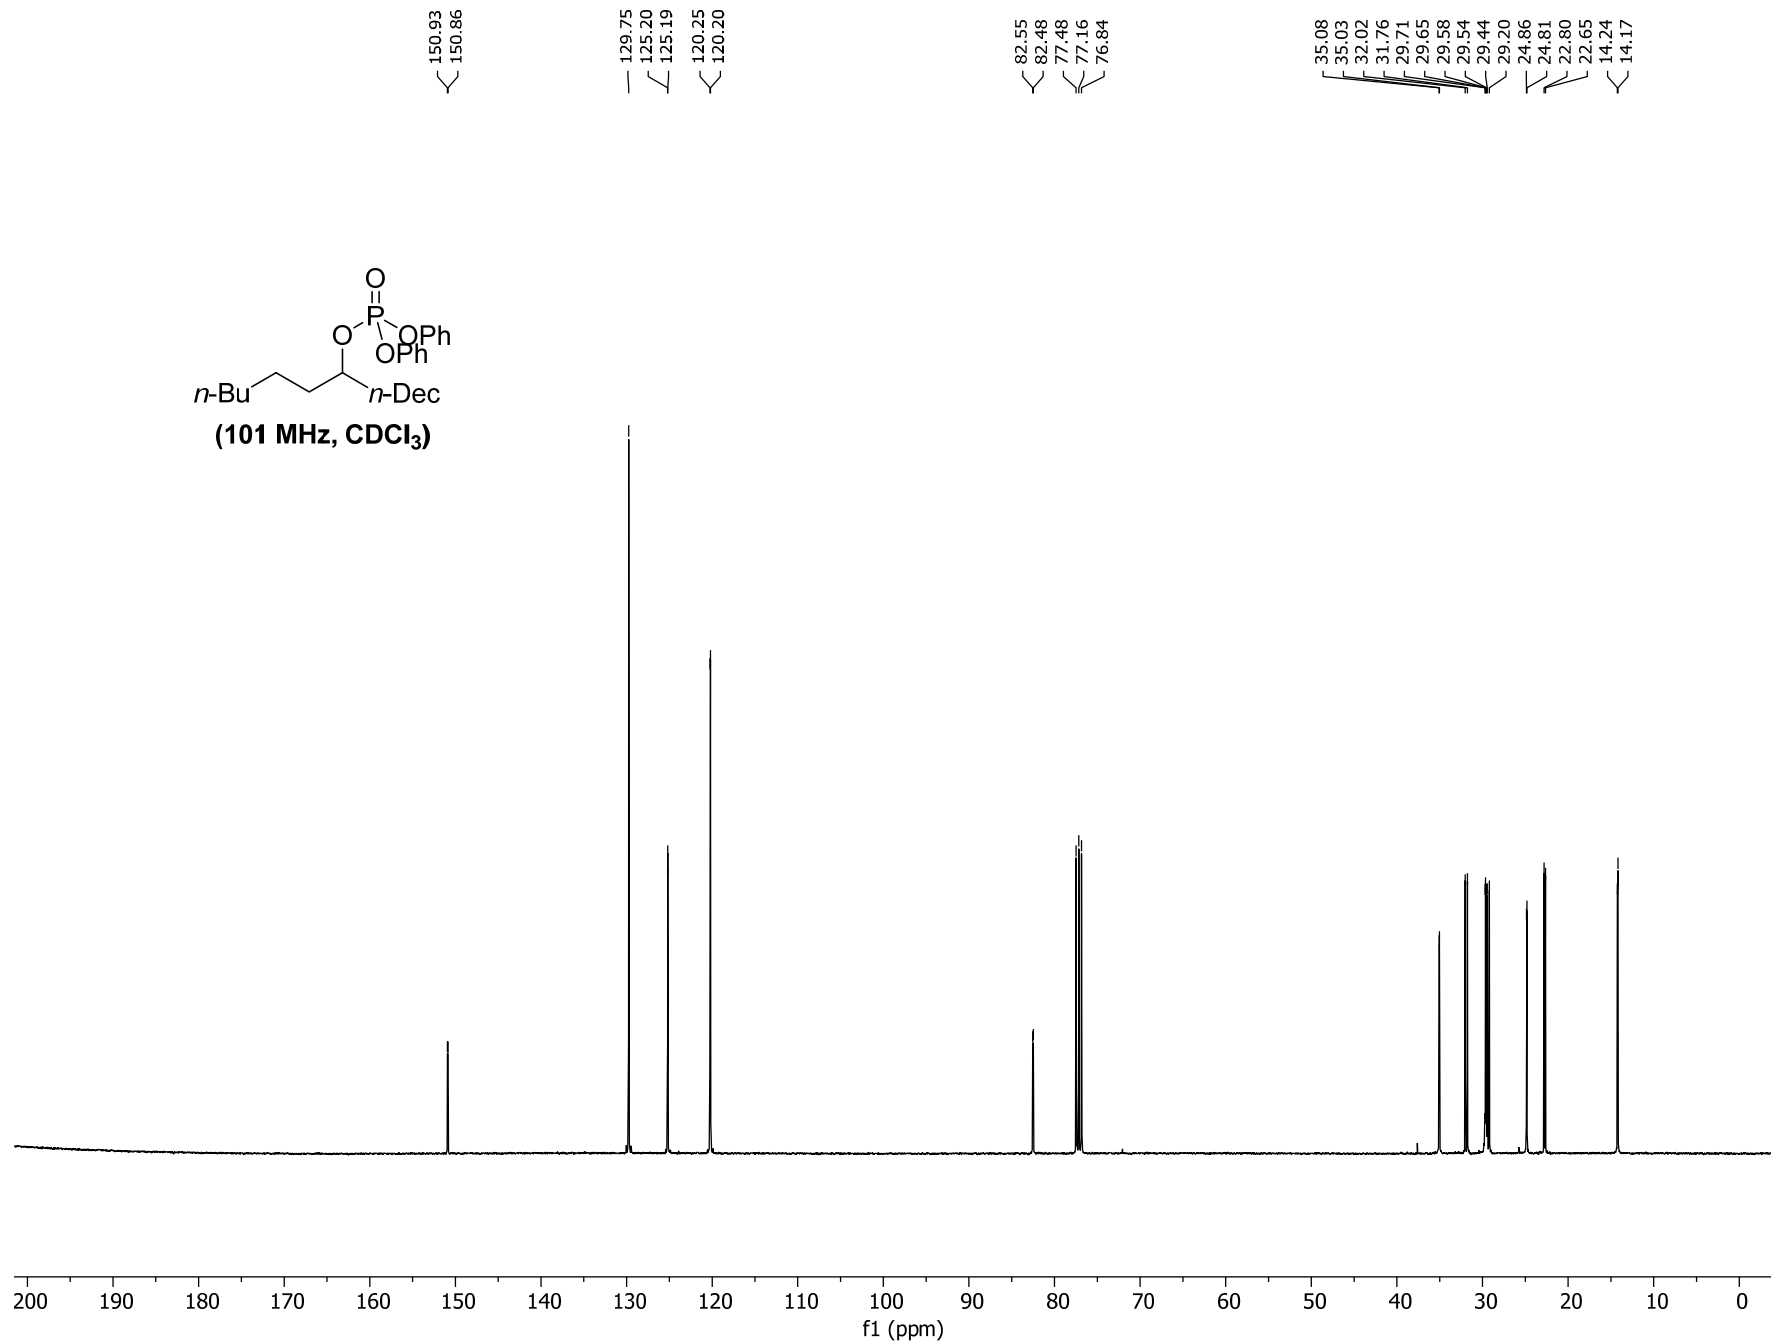

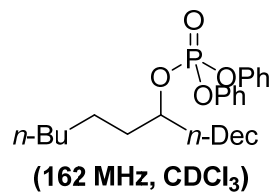

— -12.37

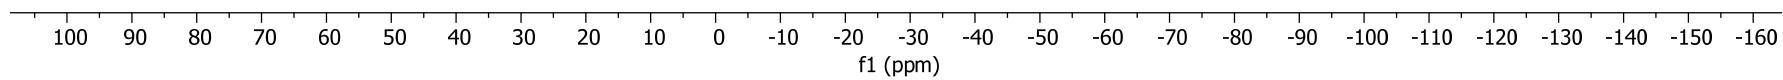

S-168



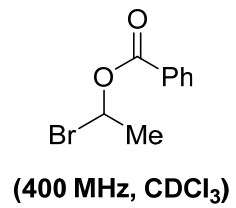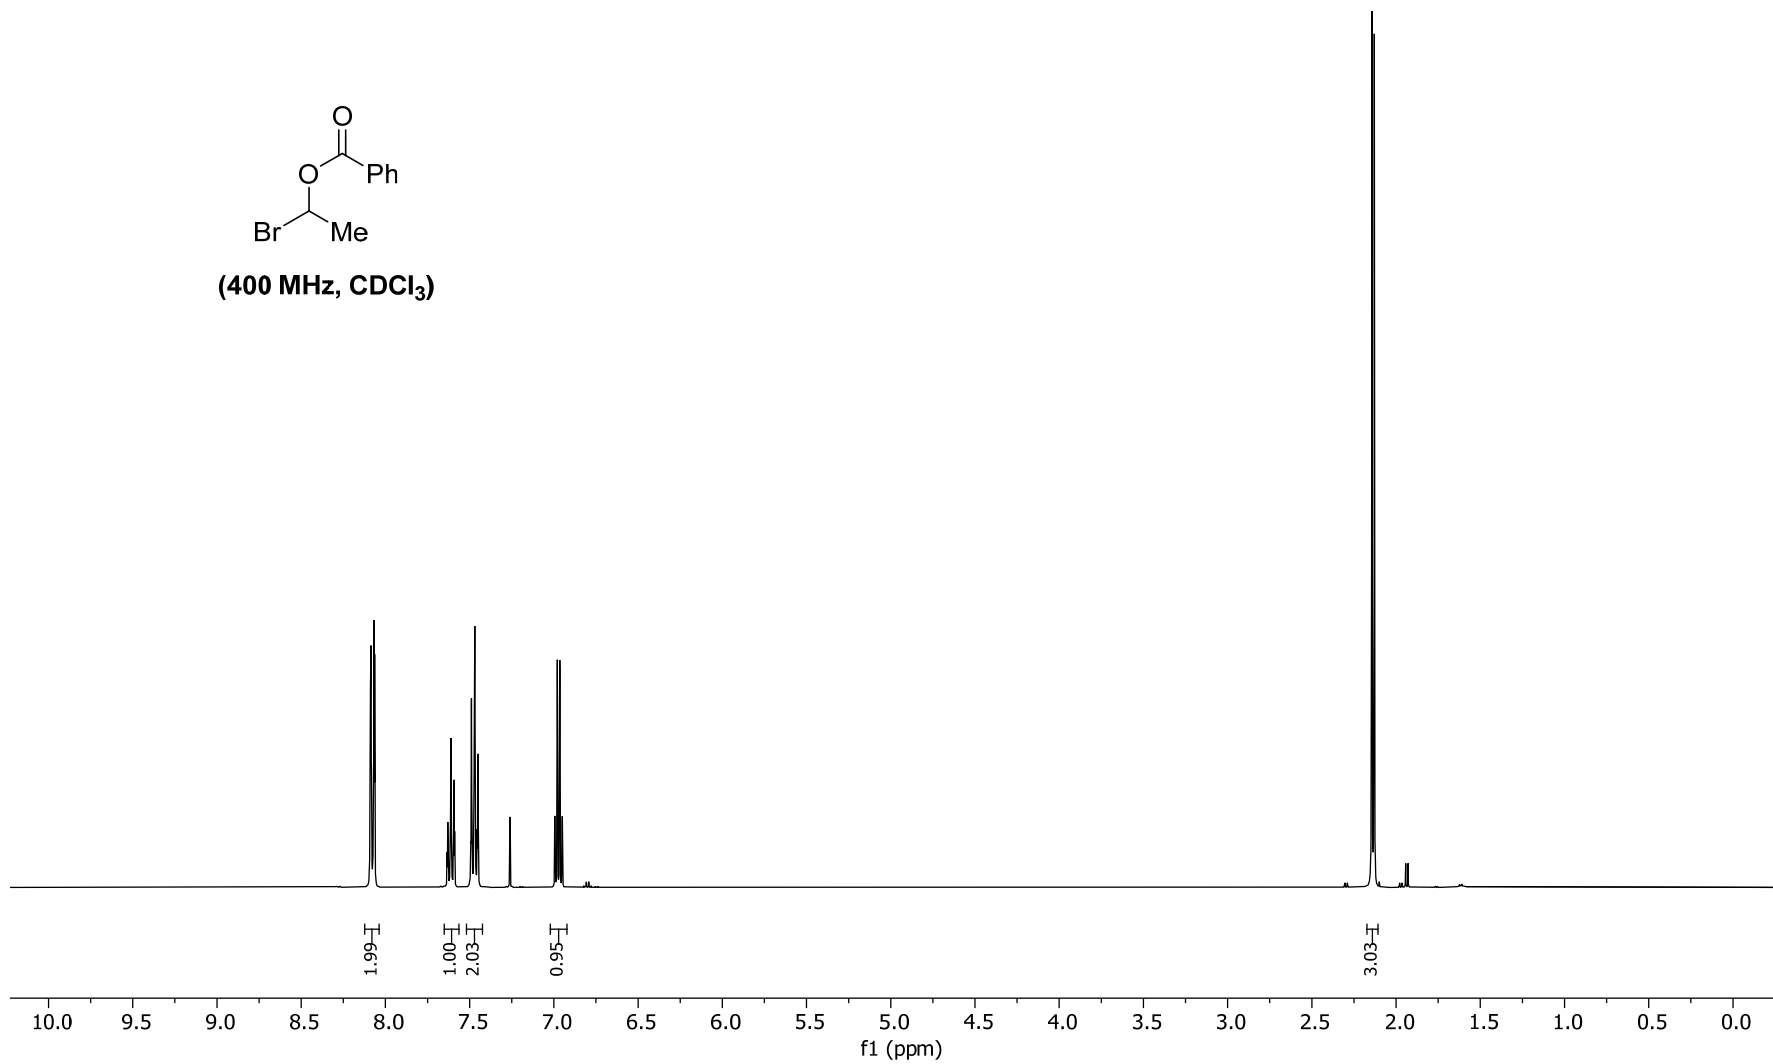

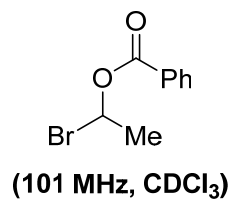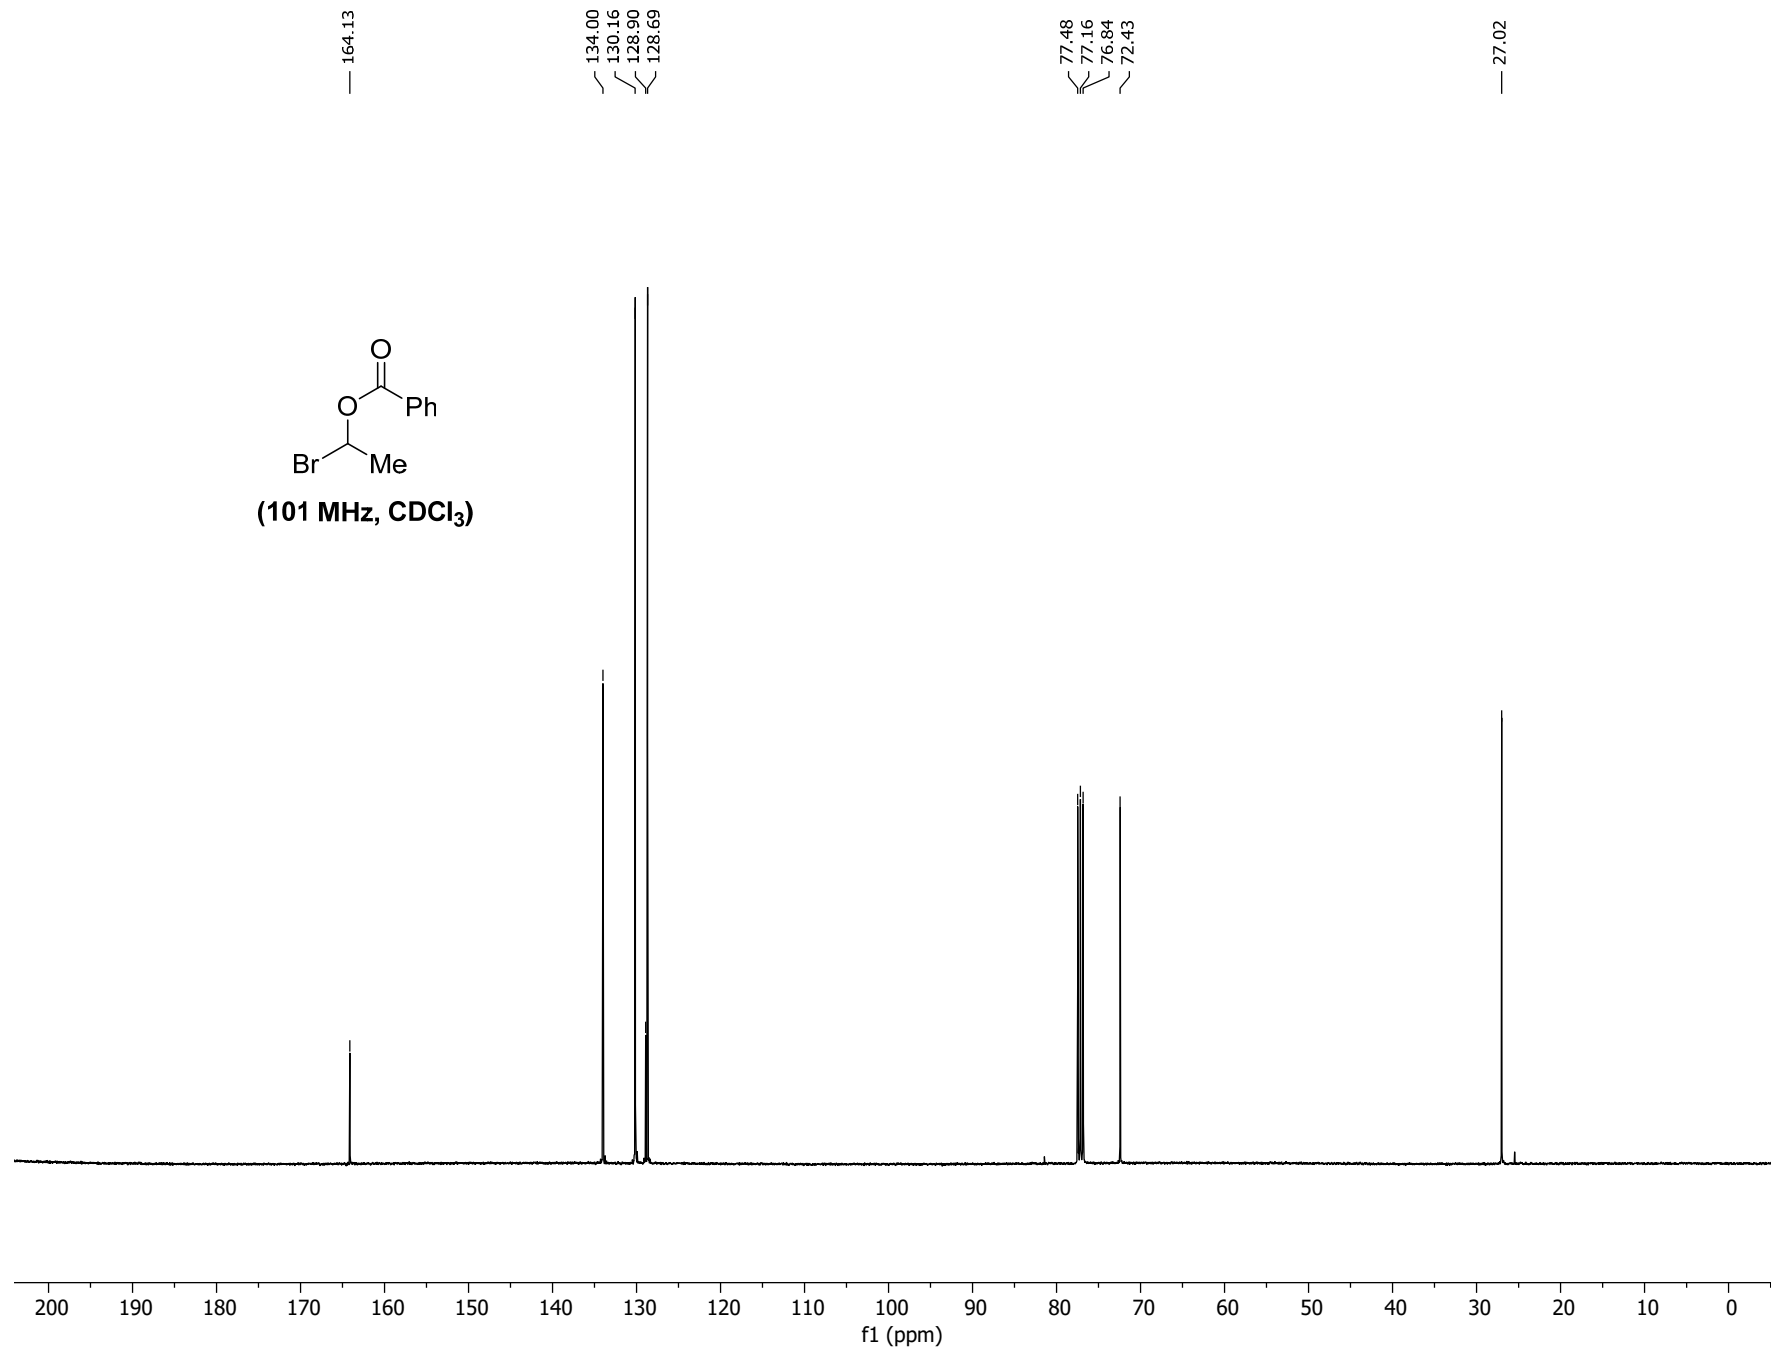

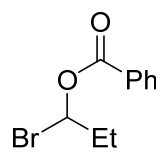

(500 MHz, CDCl<sub>3</sub>)

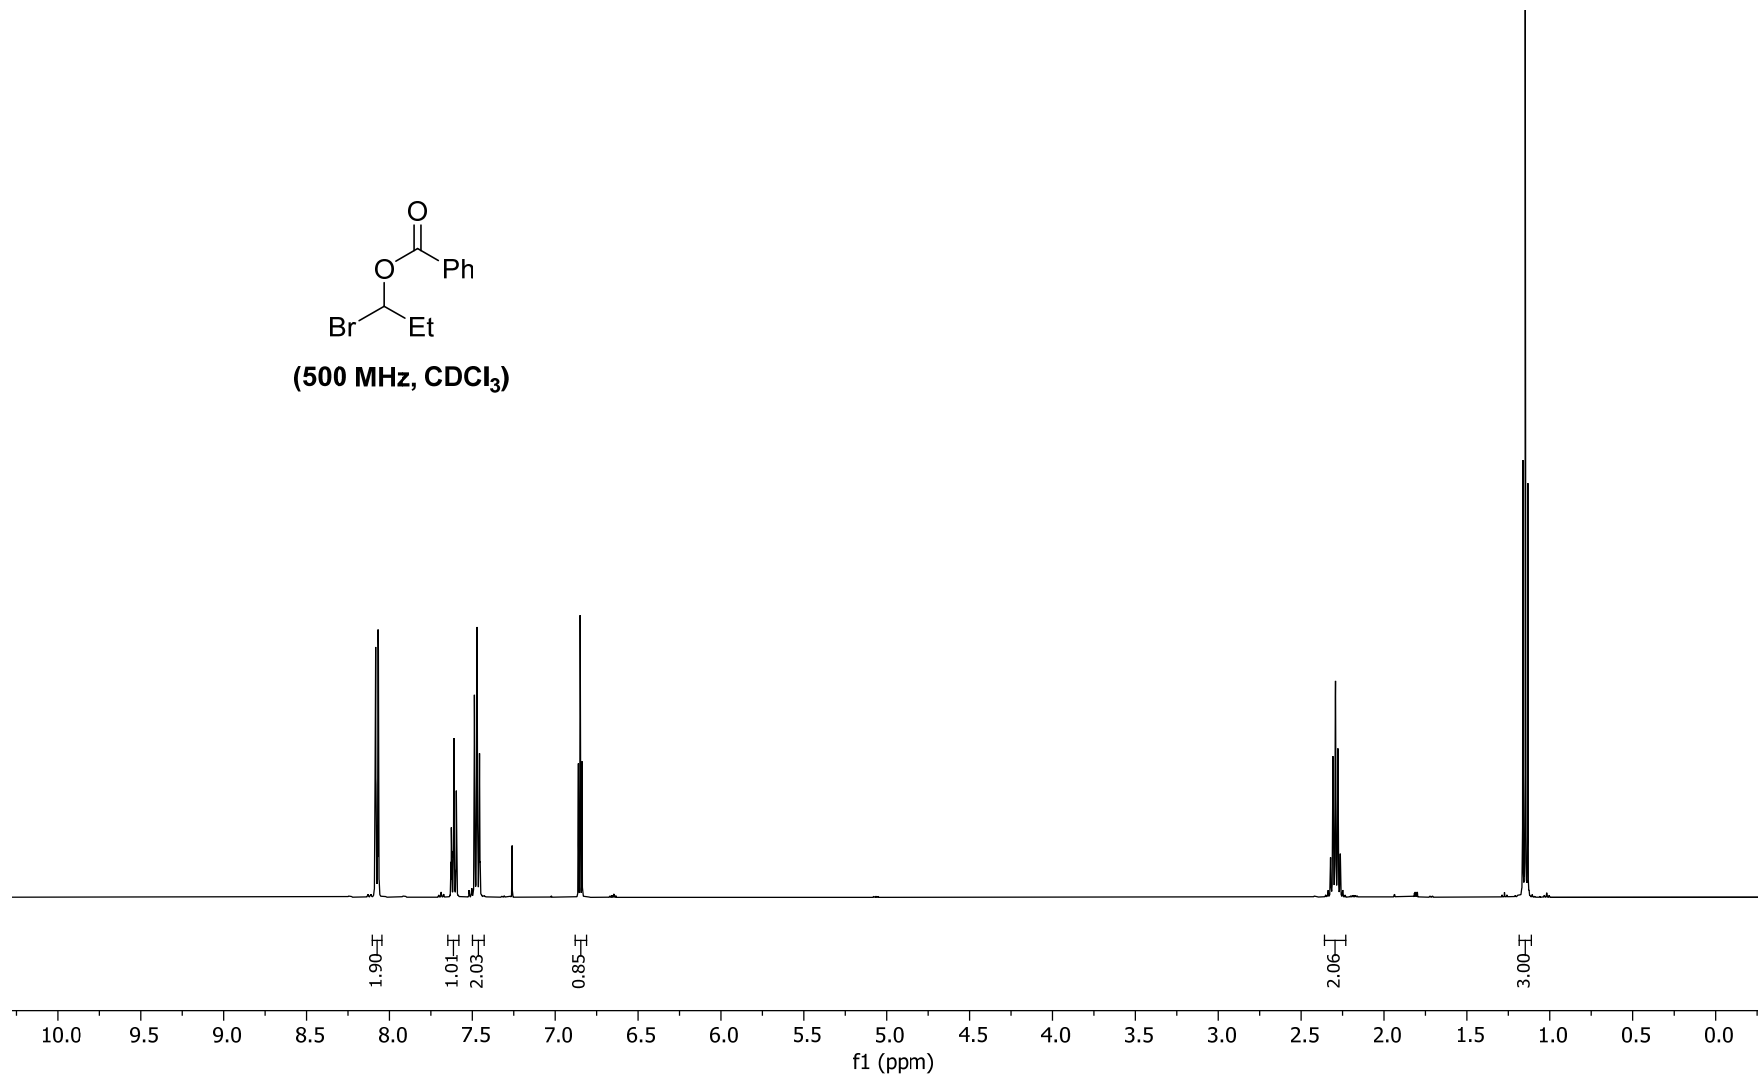

S-171

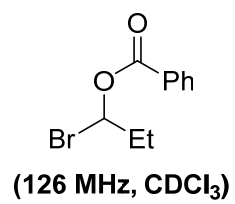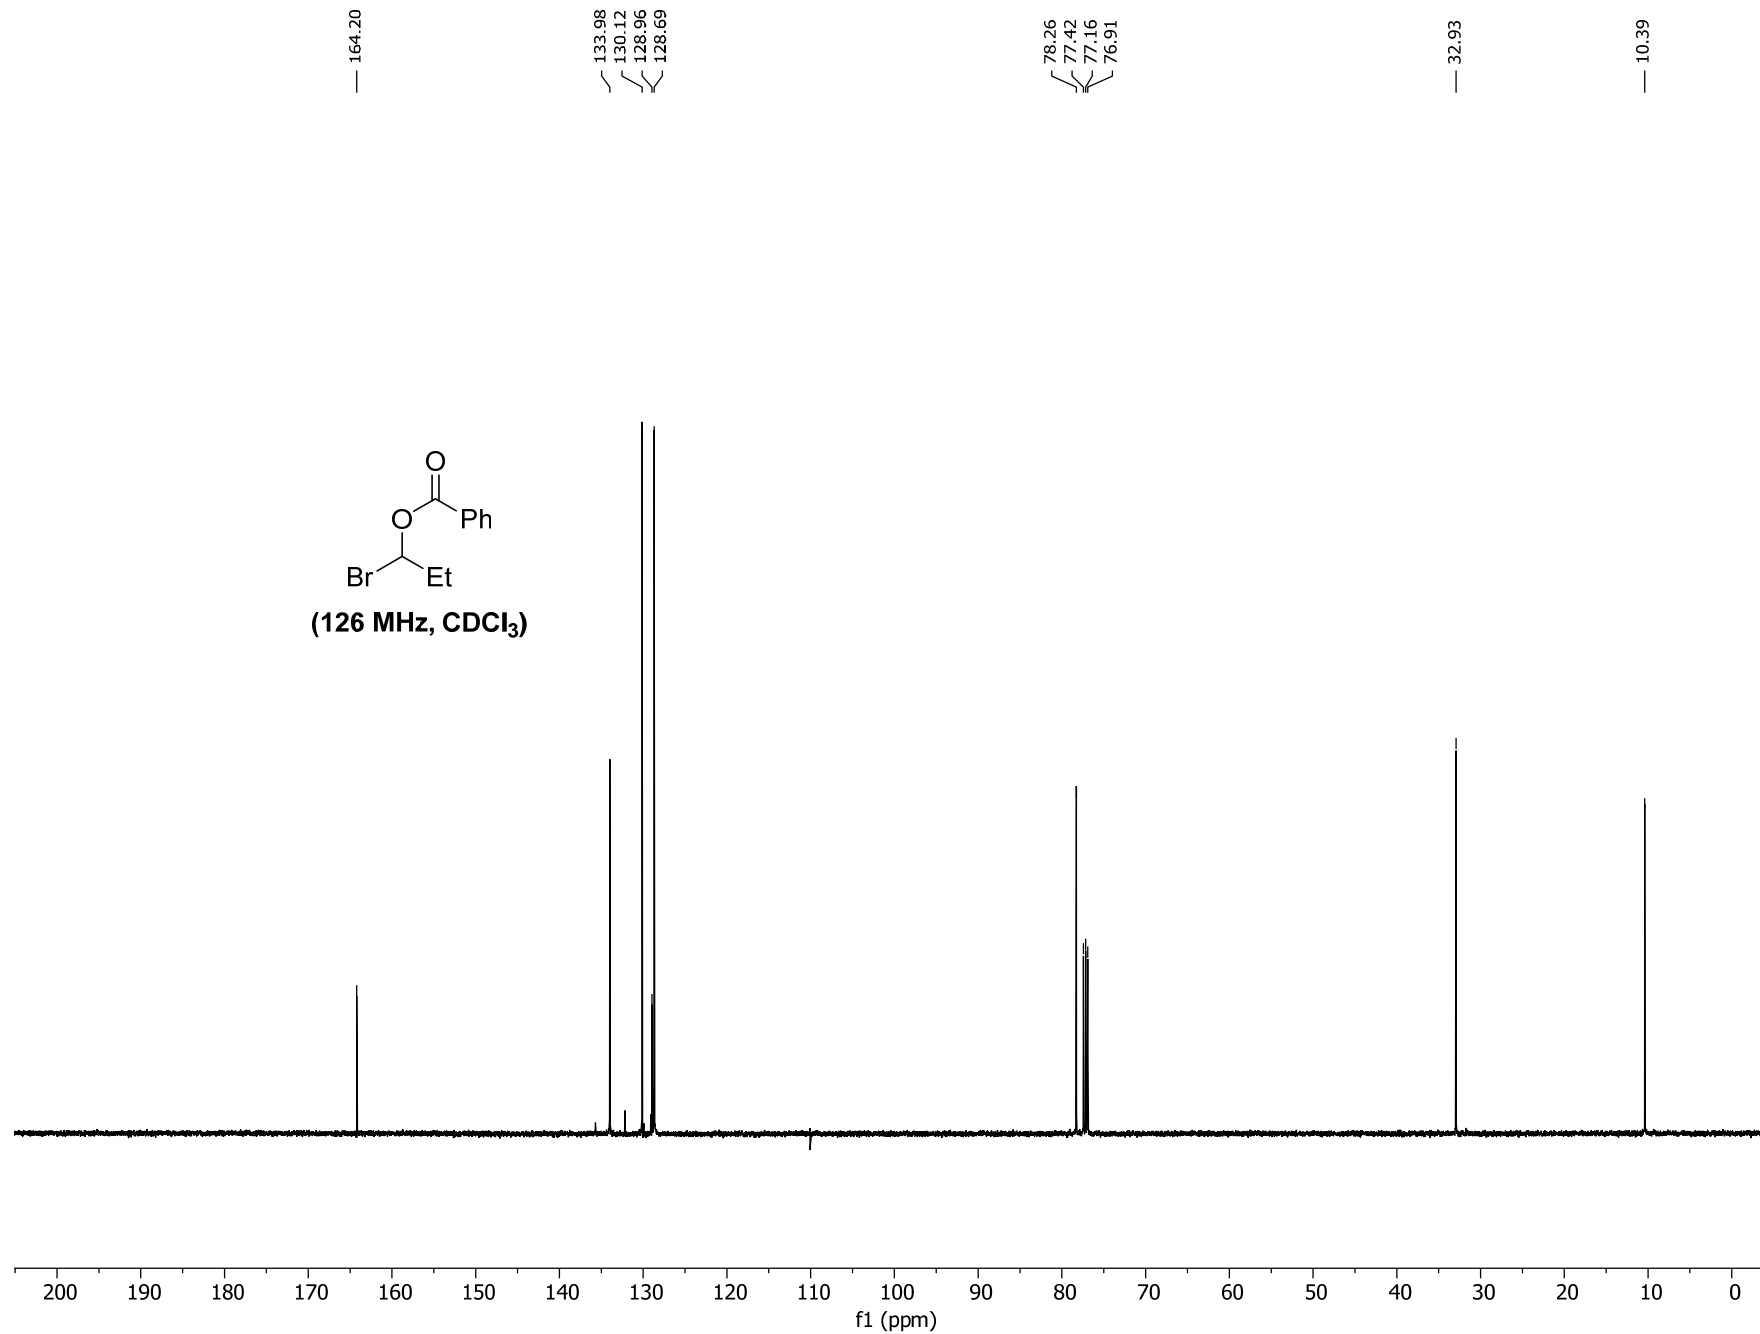

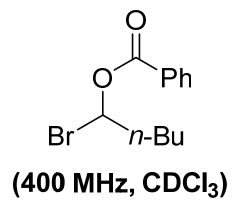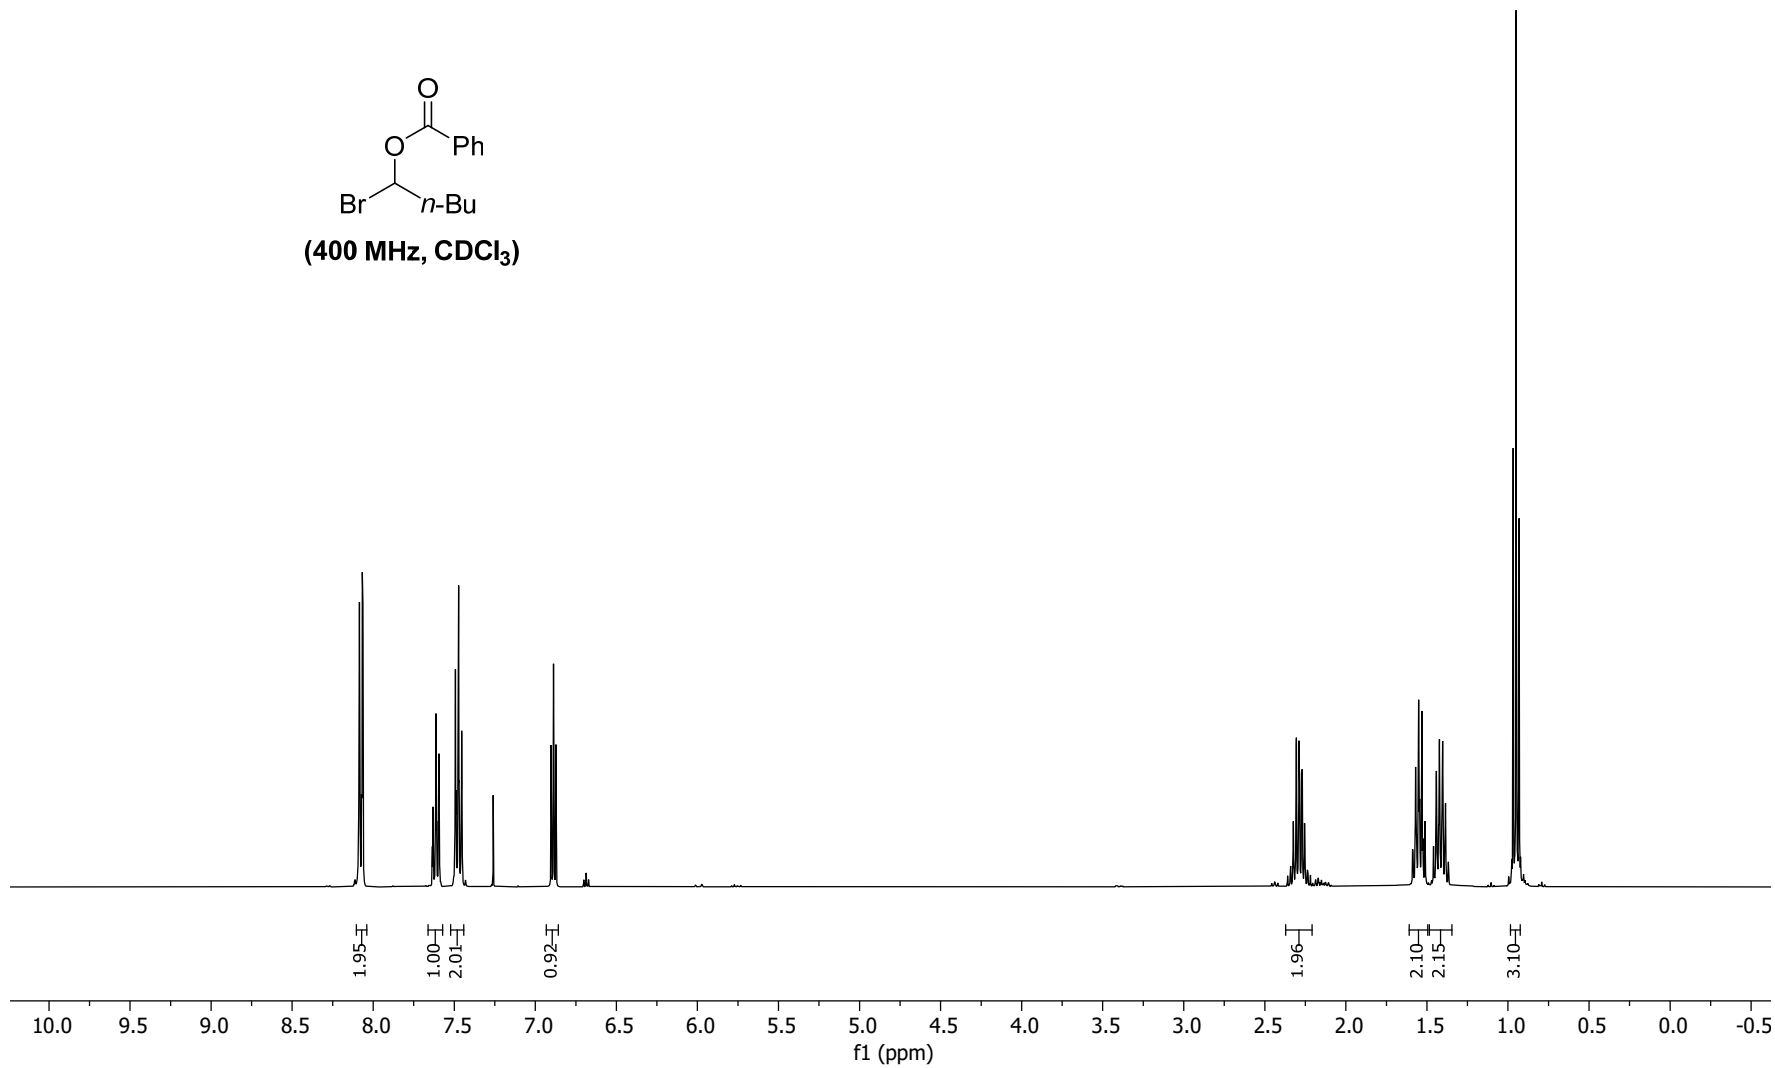

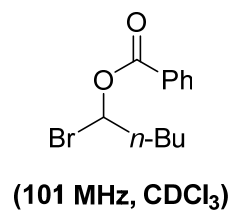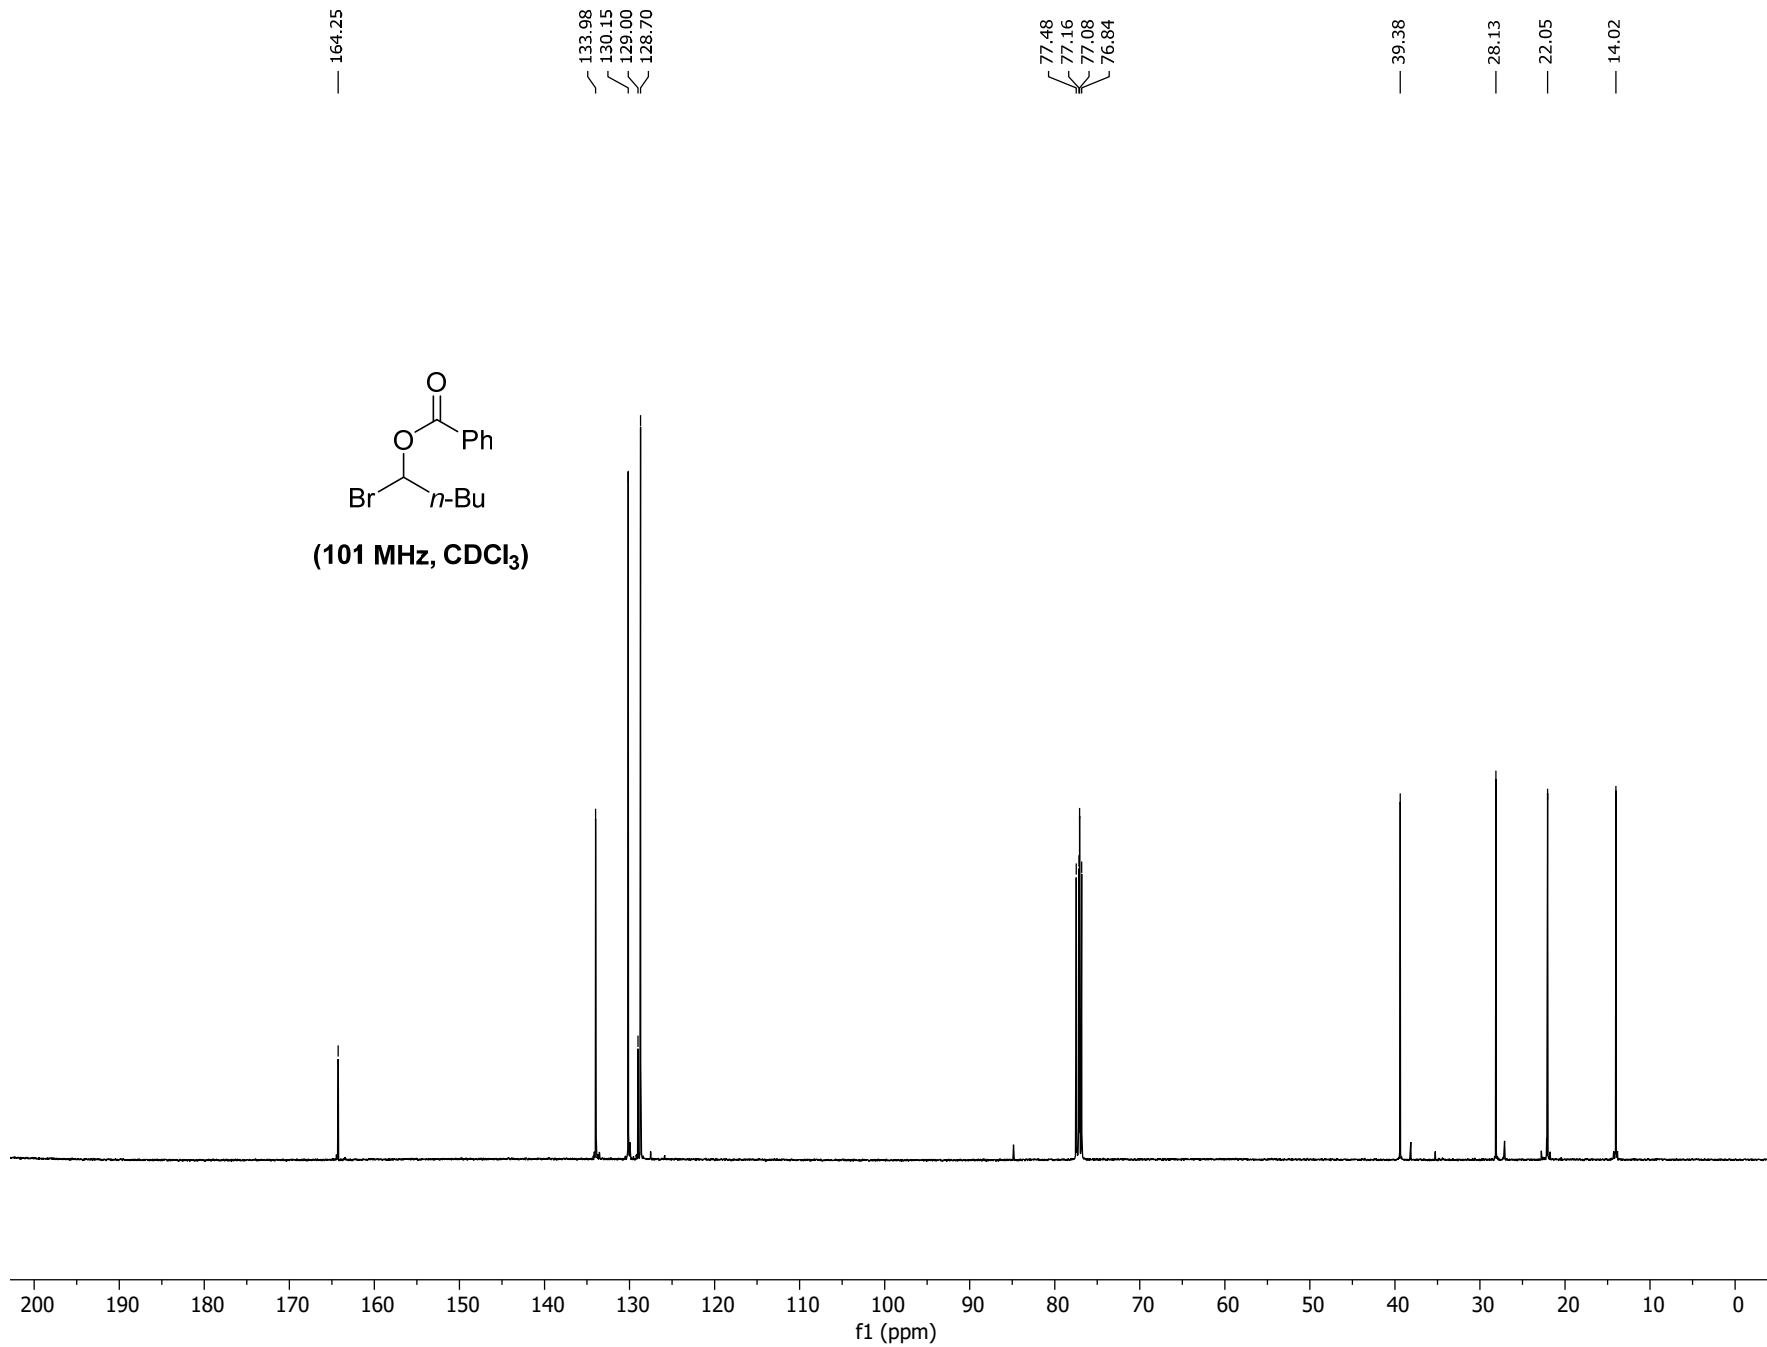

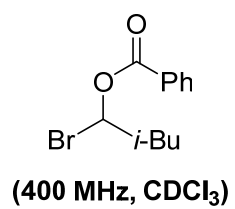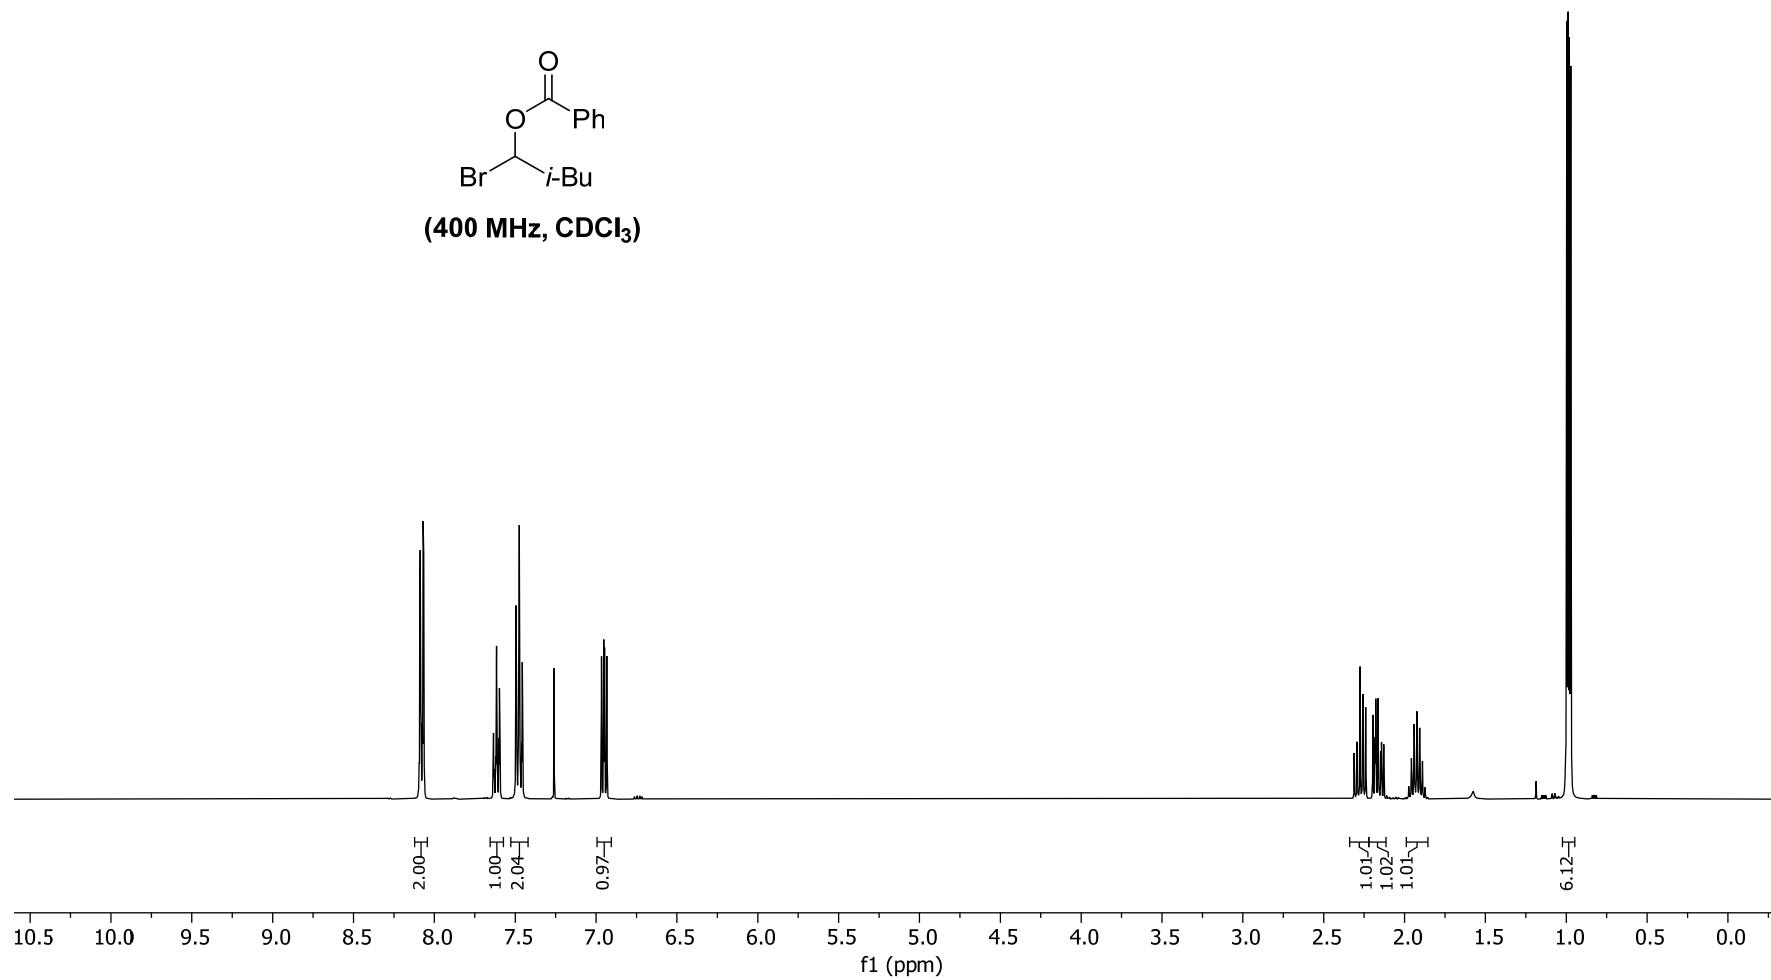

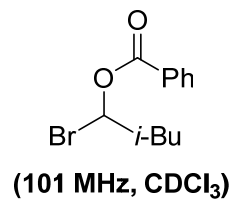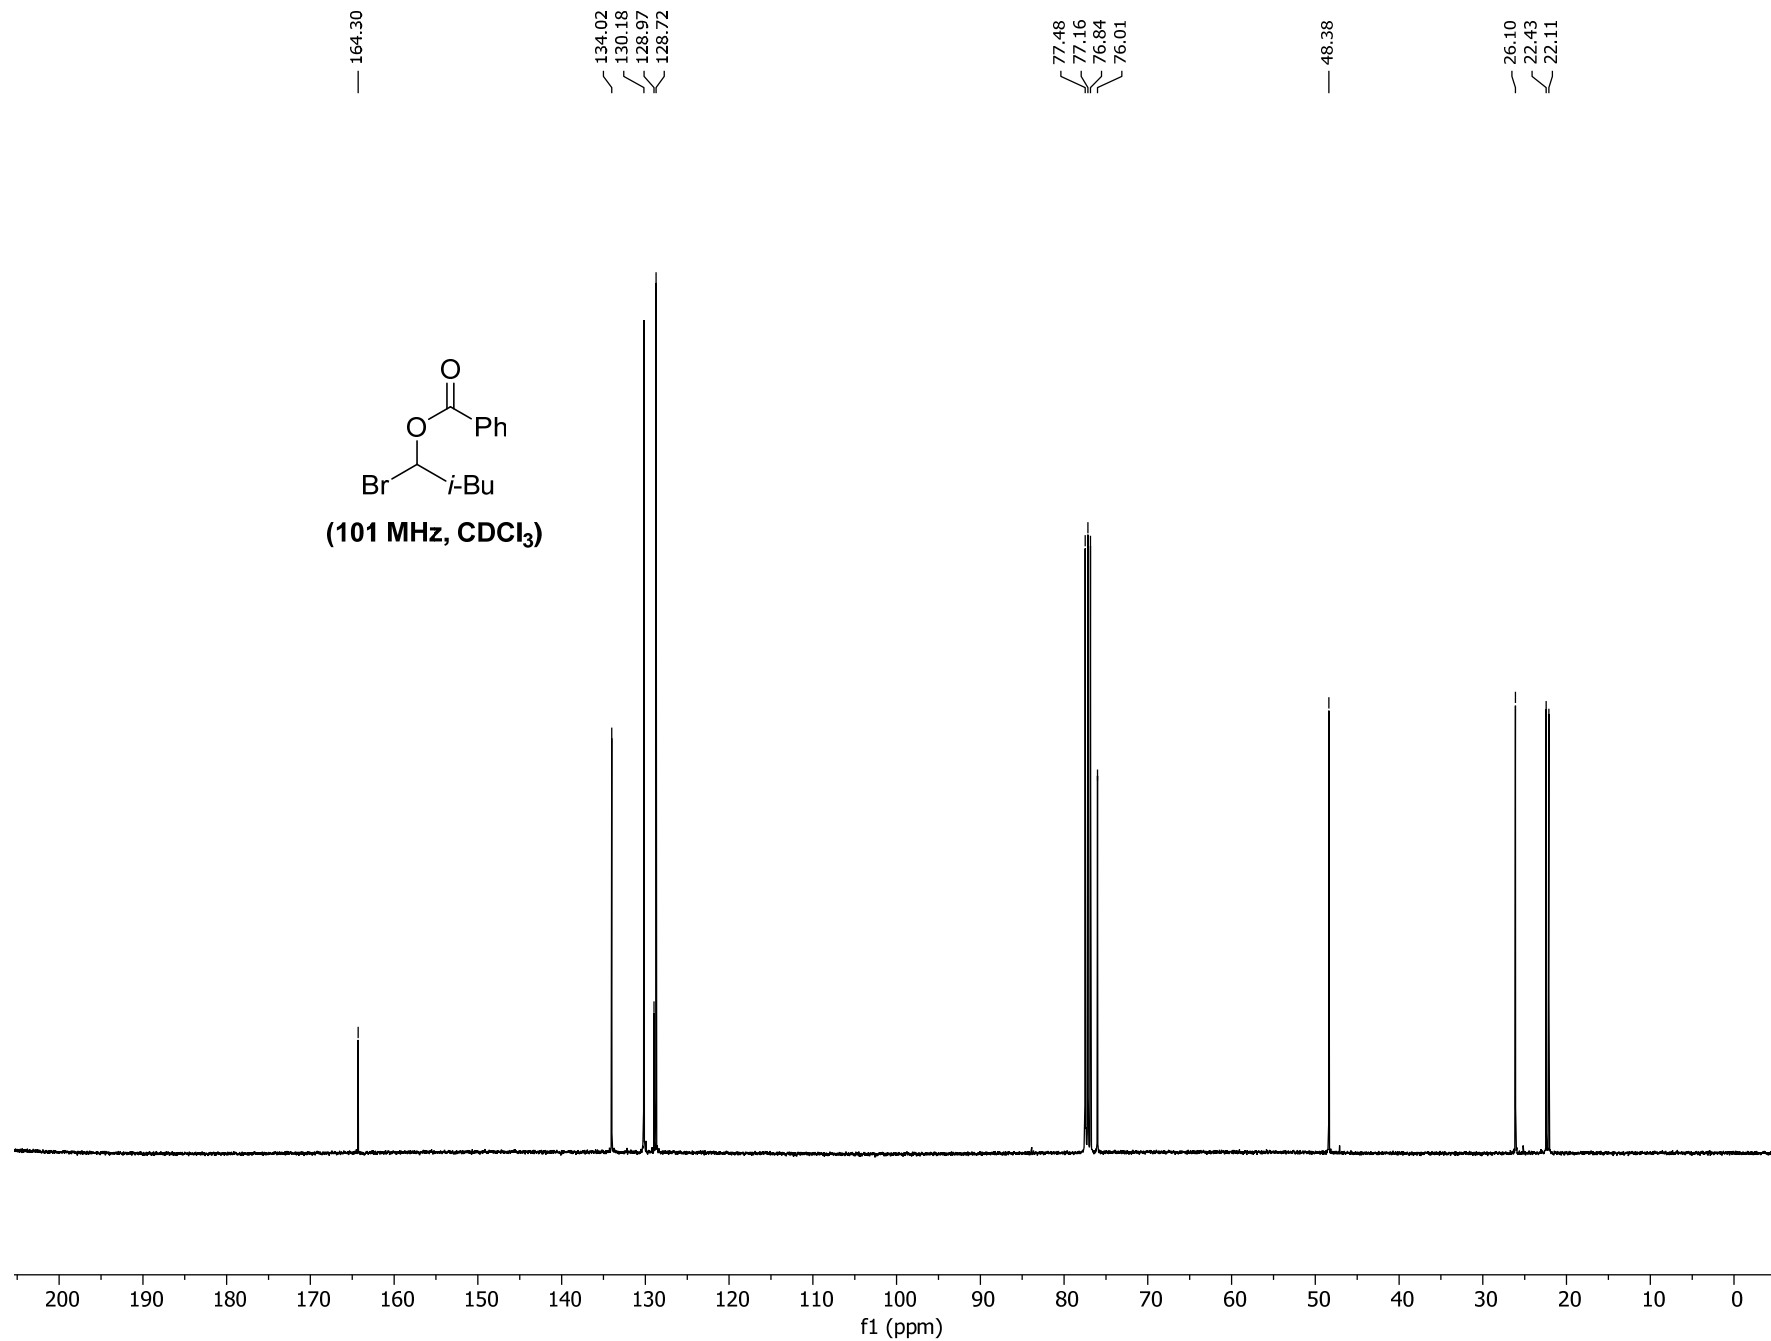



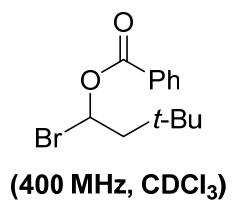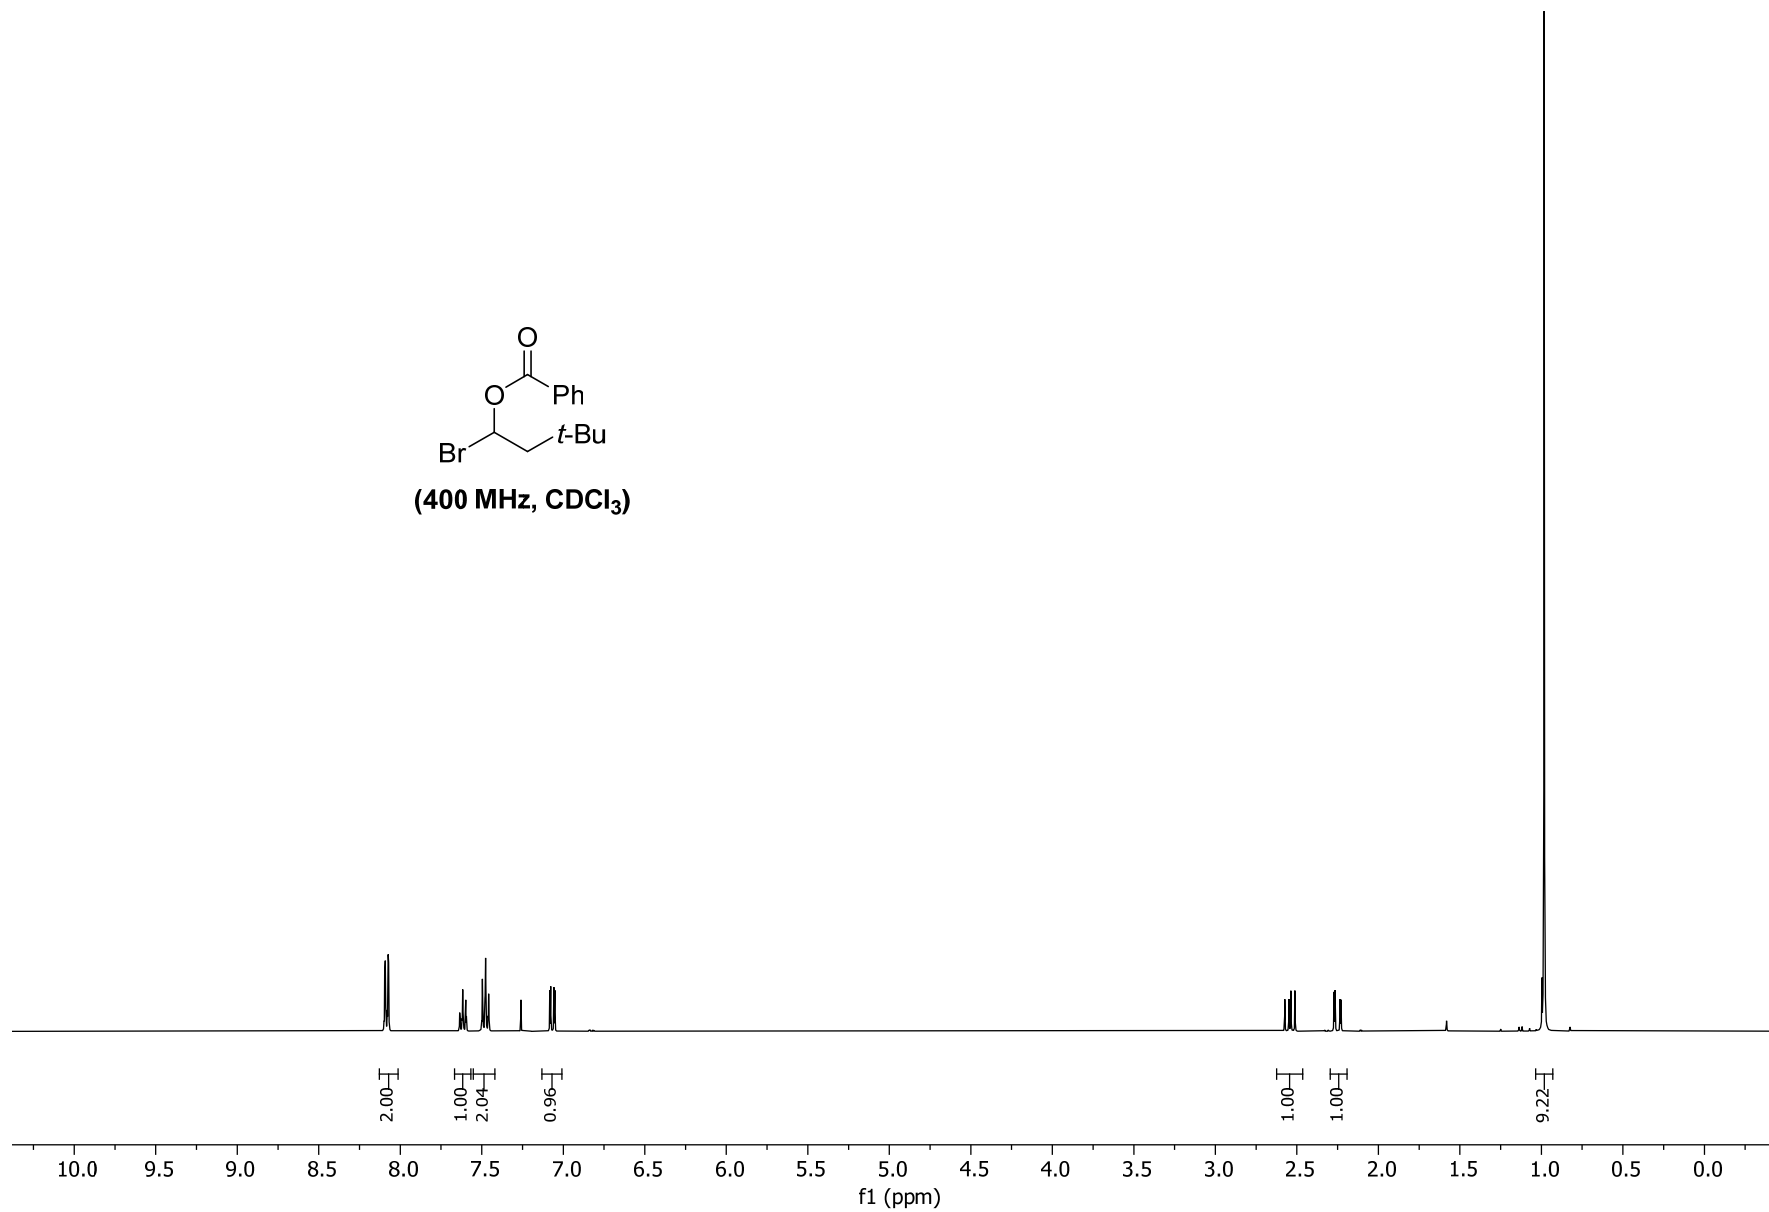

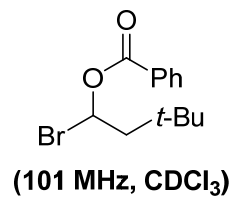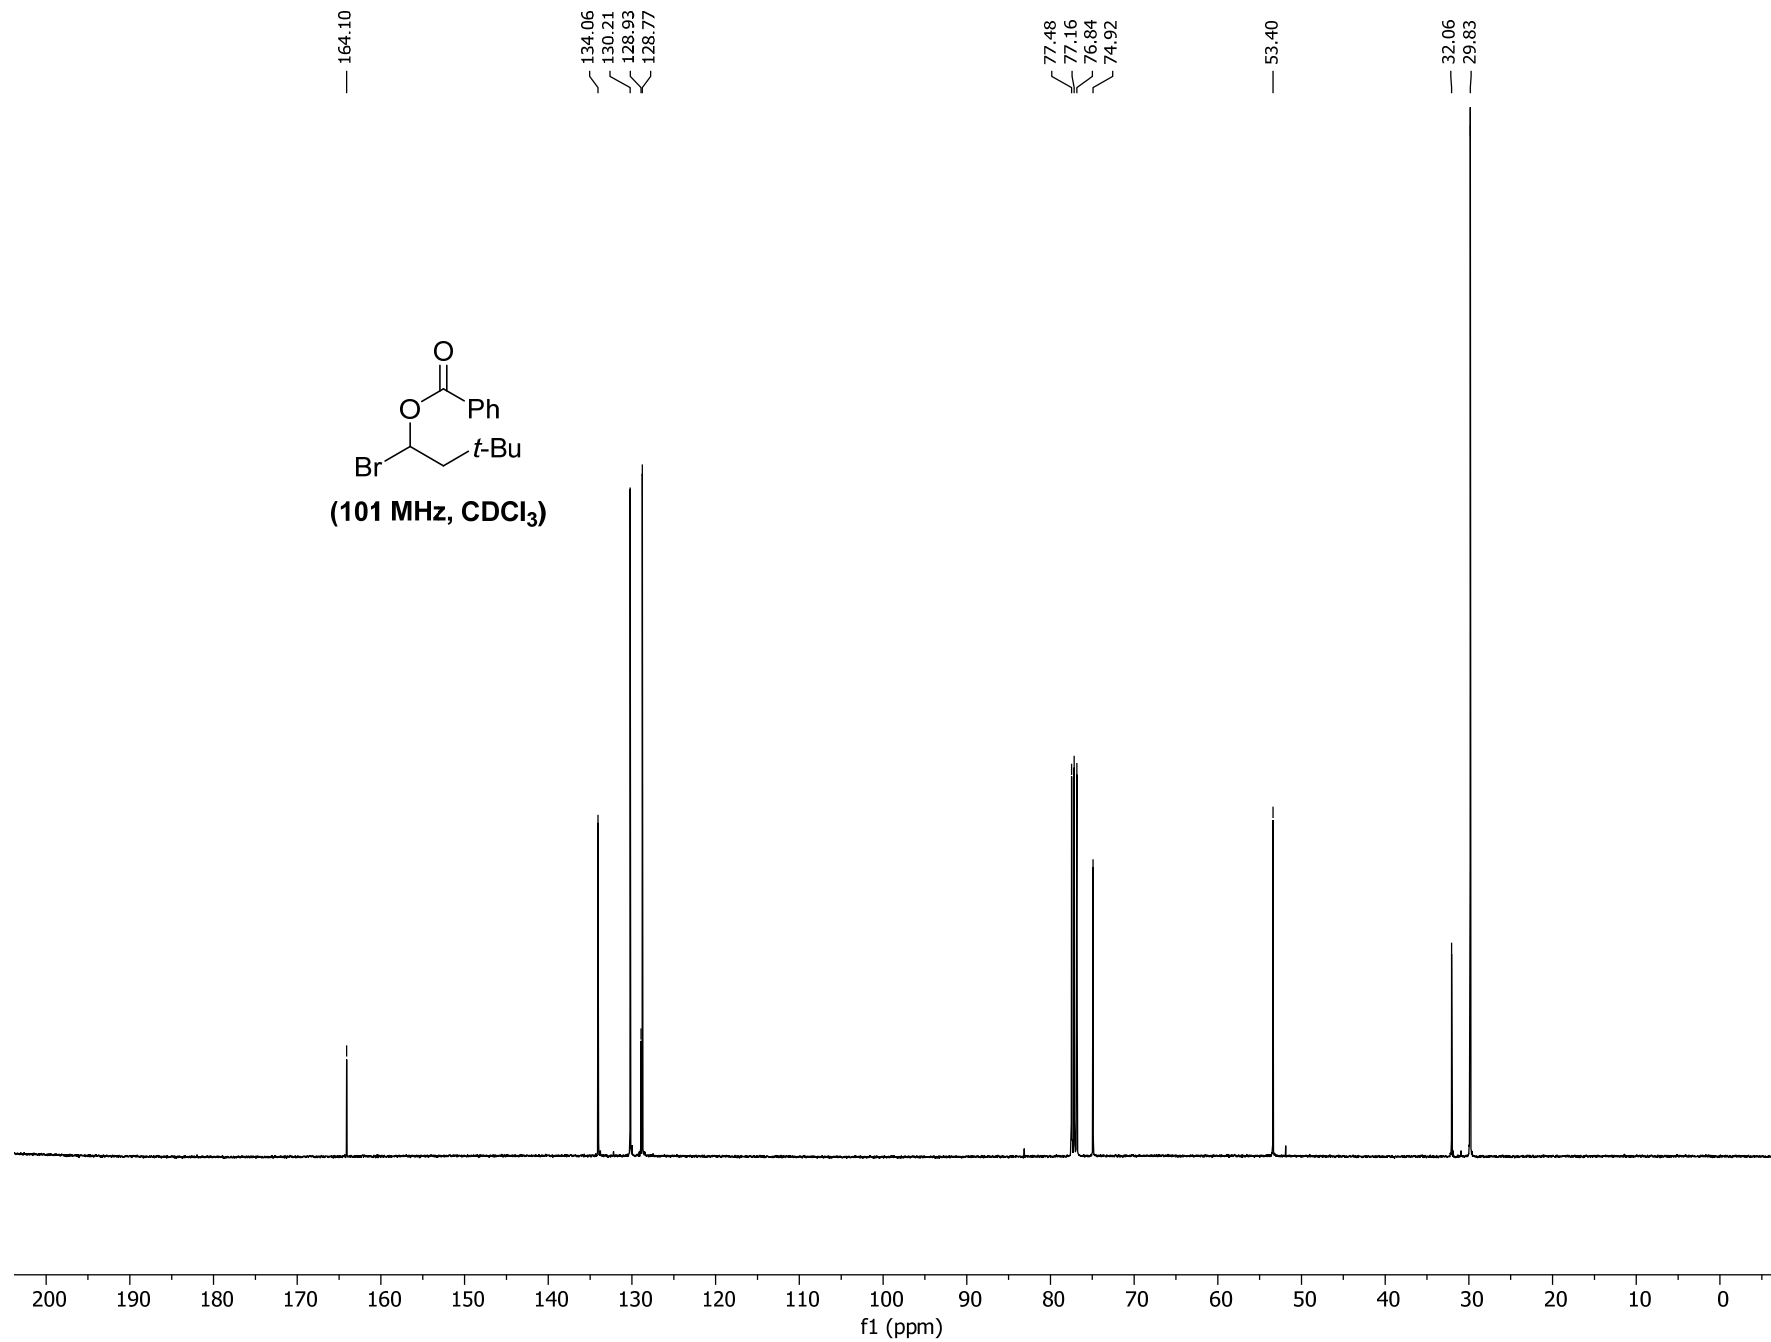

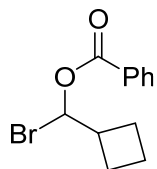

(400 MHz, CDCl<sub>3</sub>)

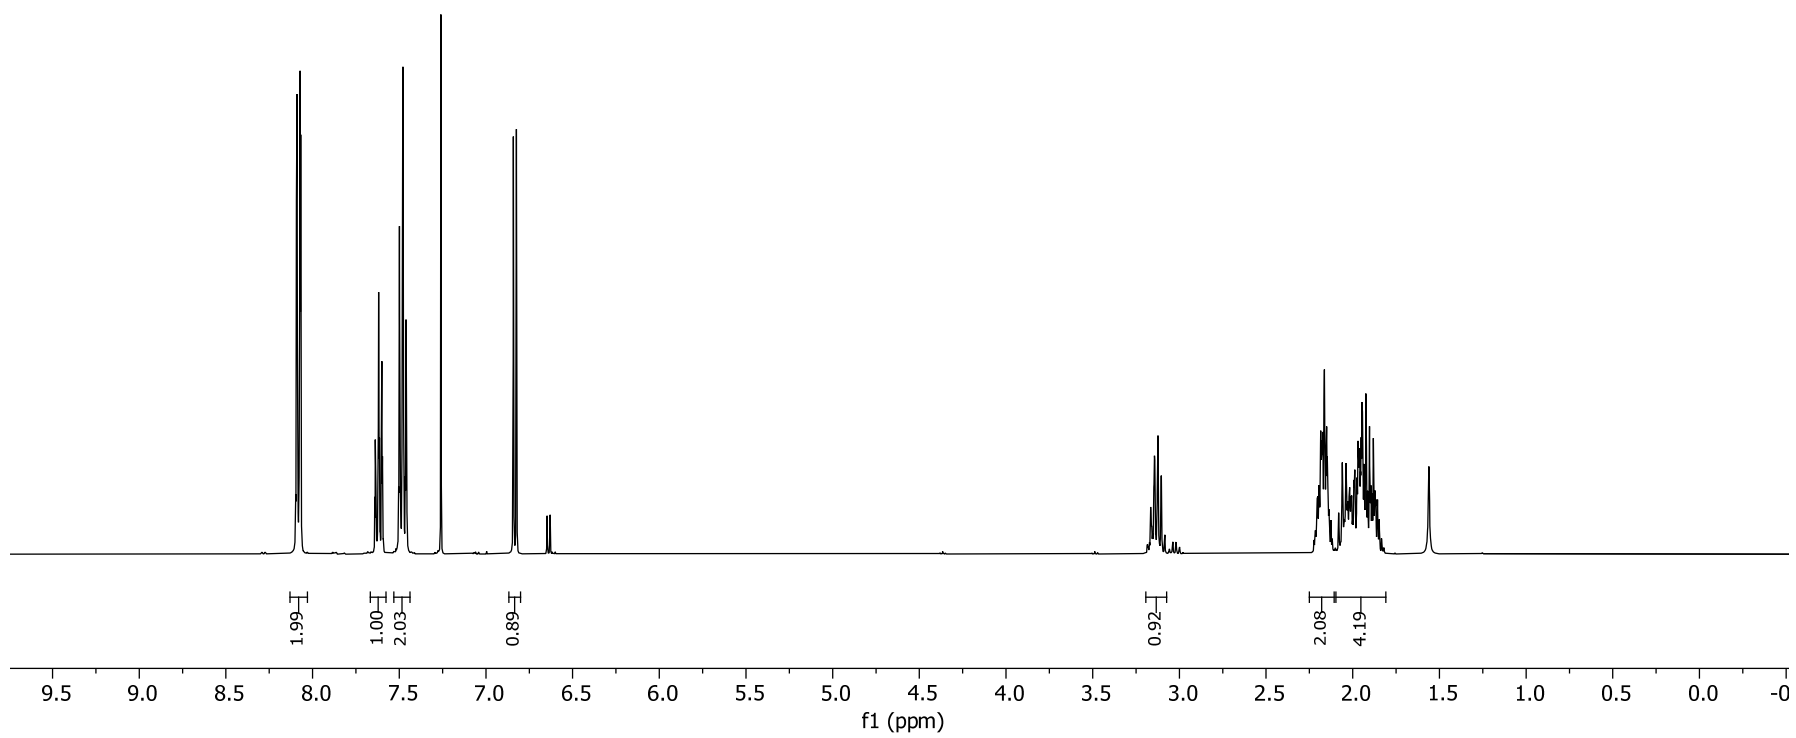

S-179

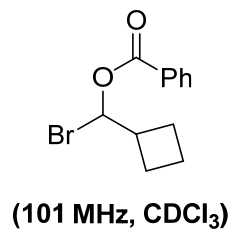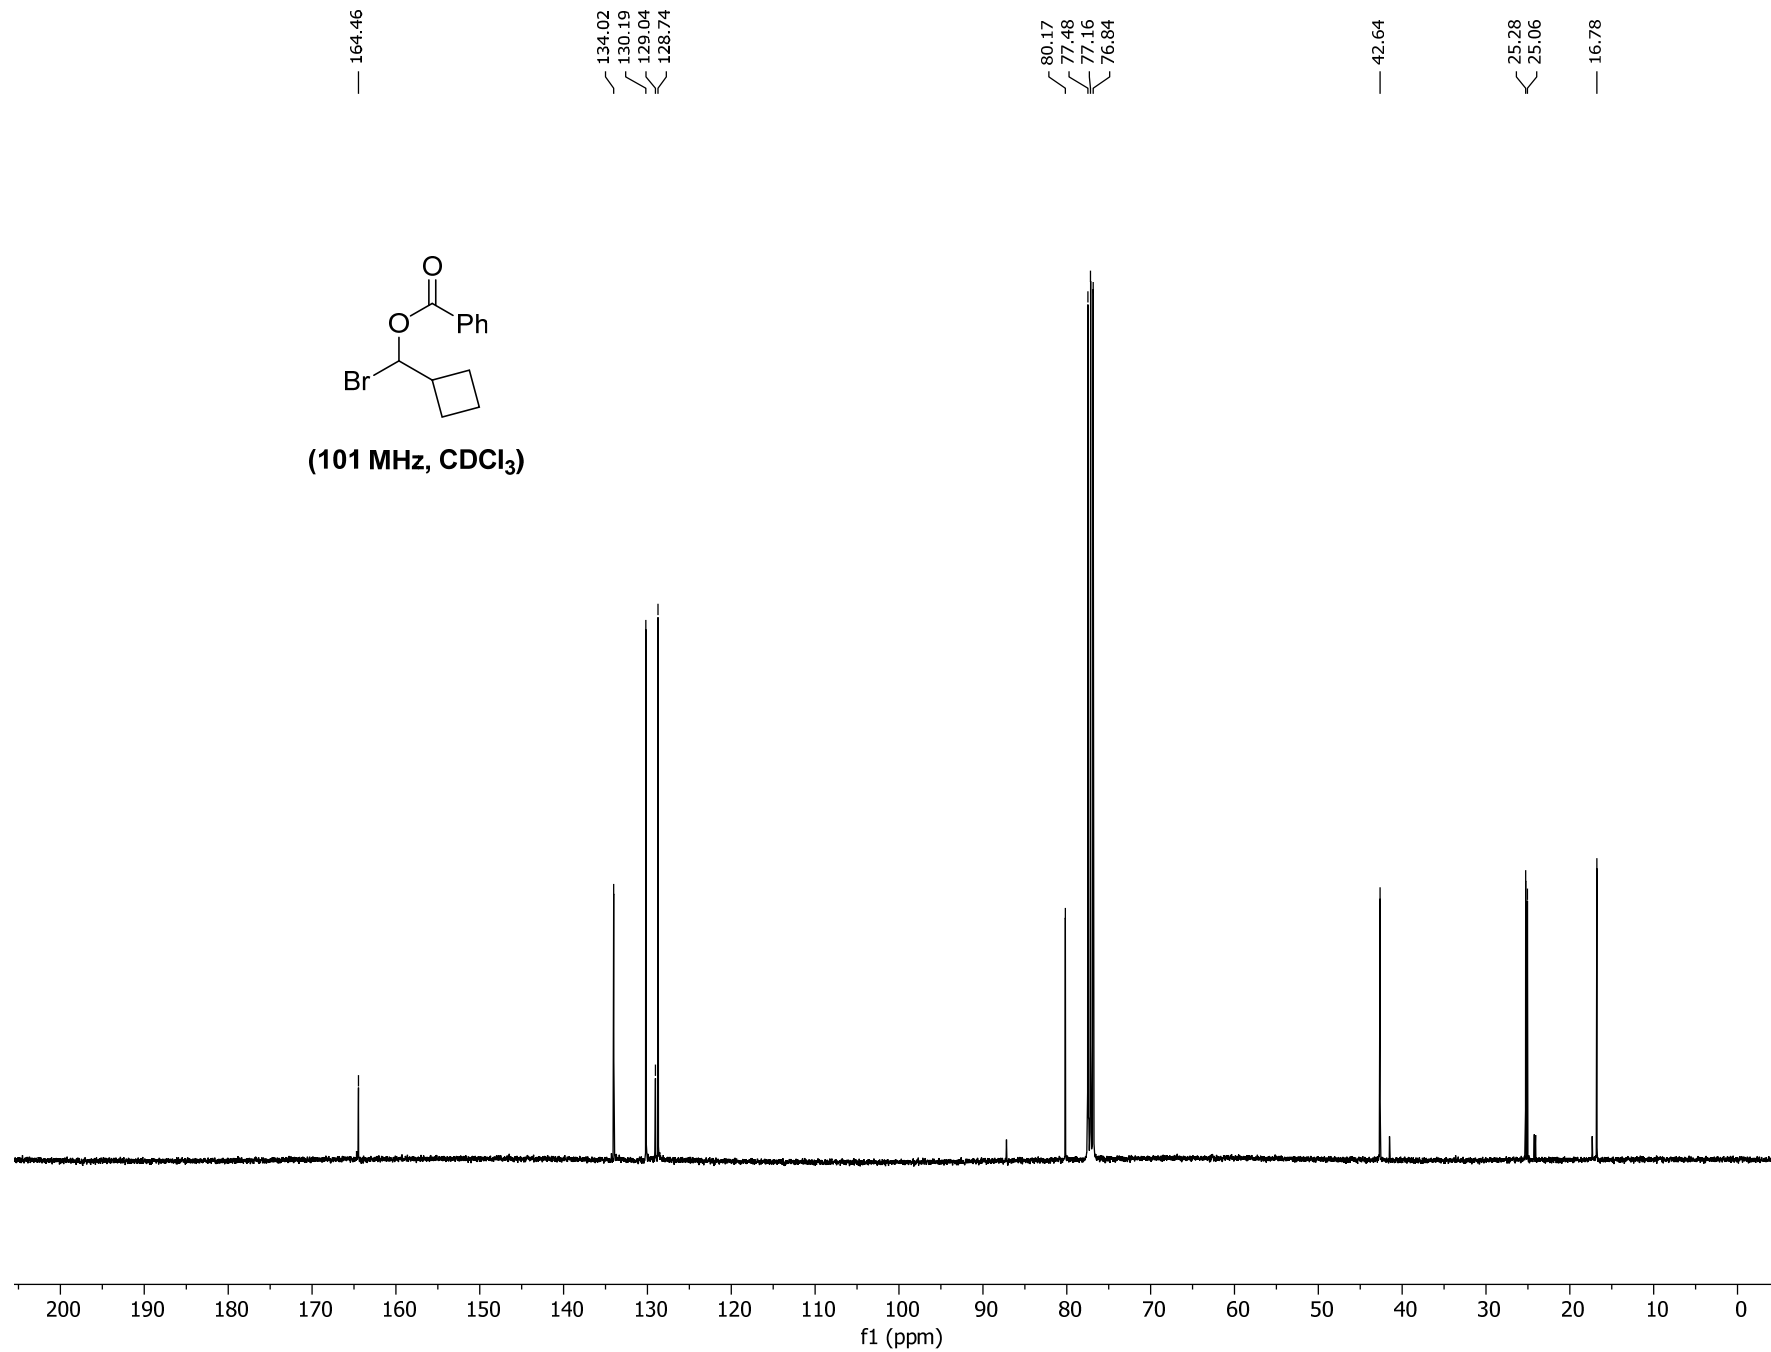

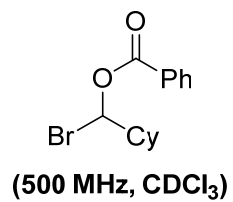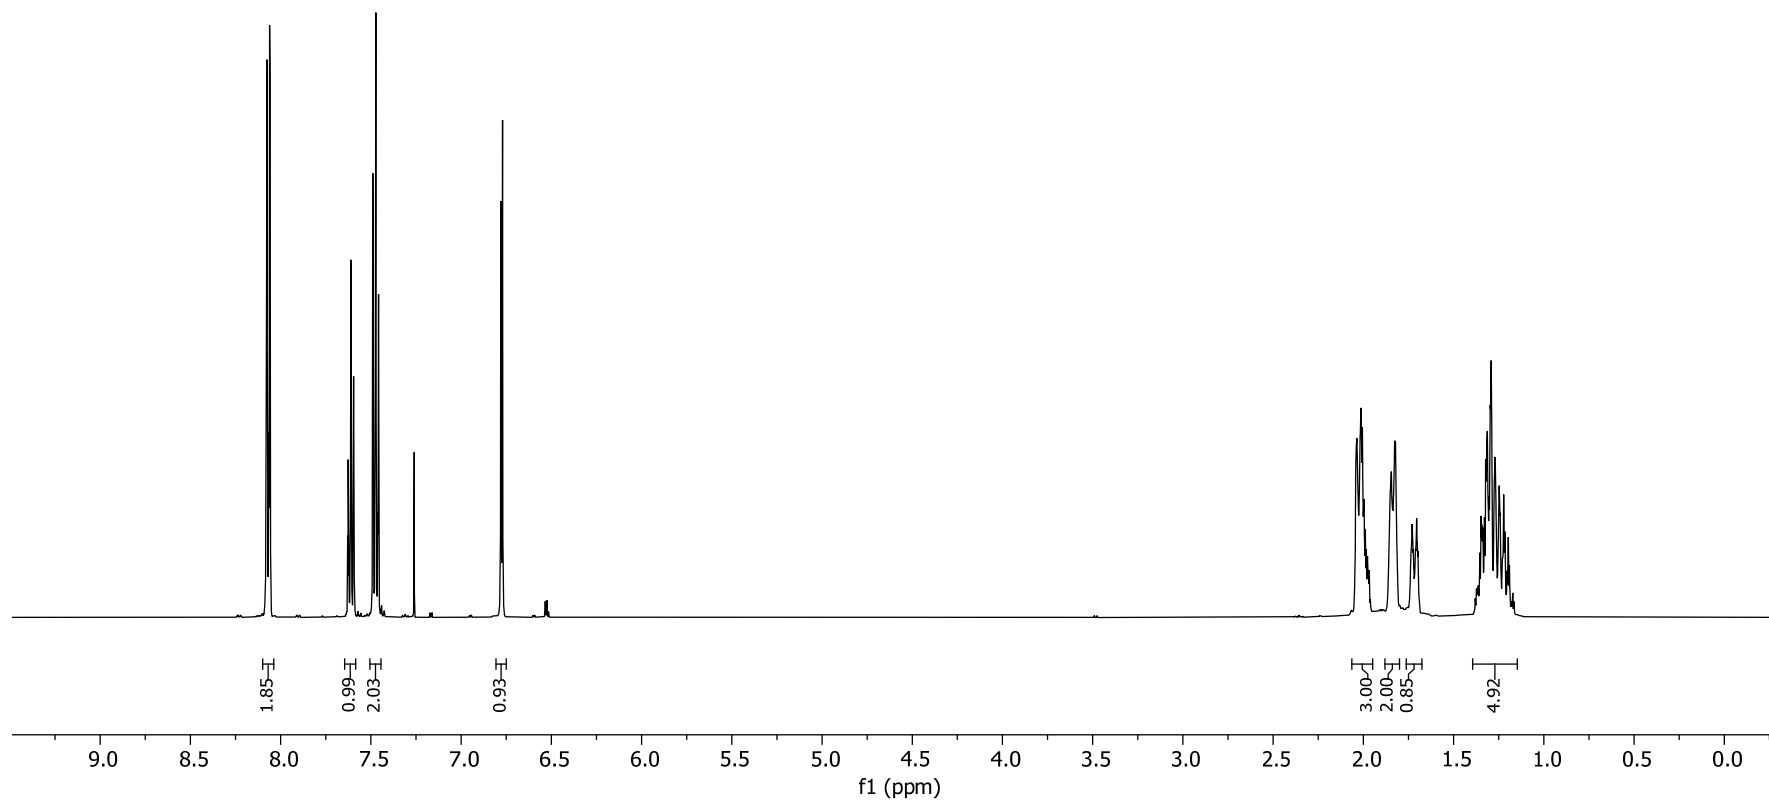

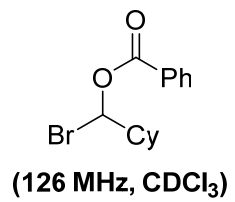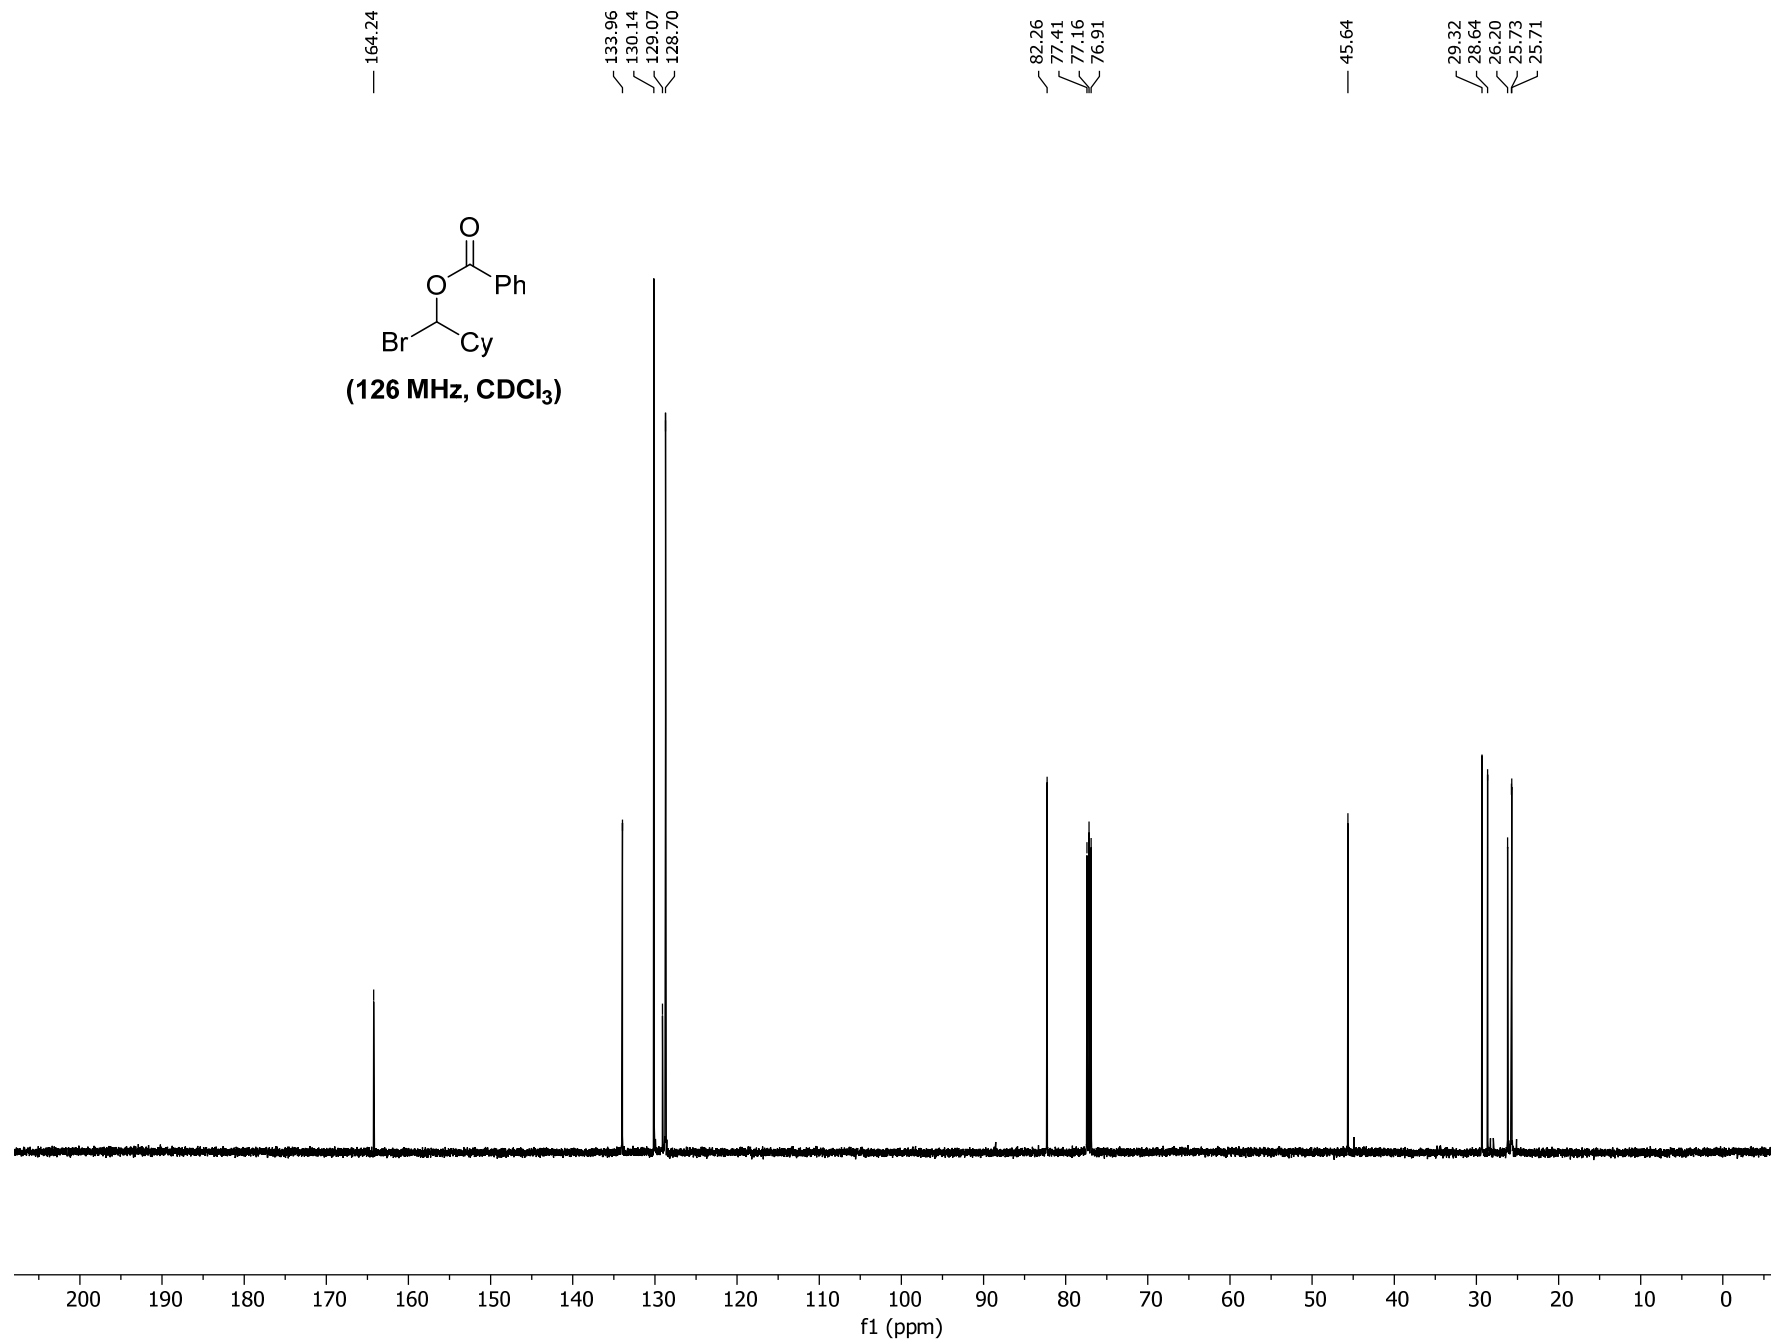

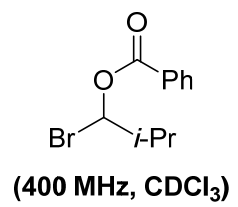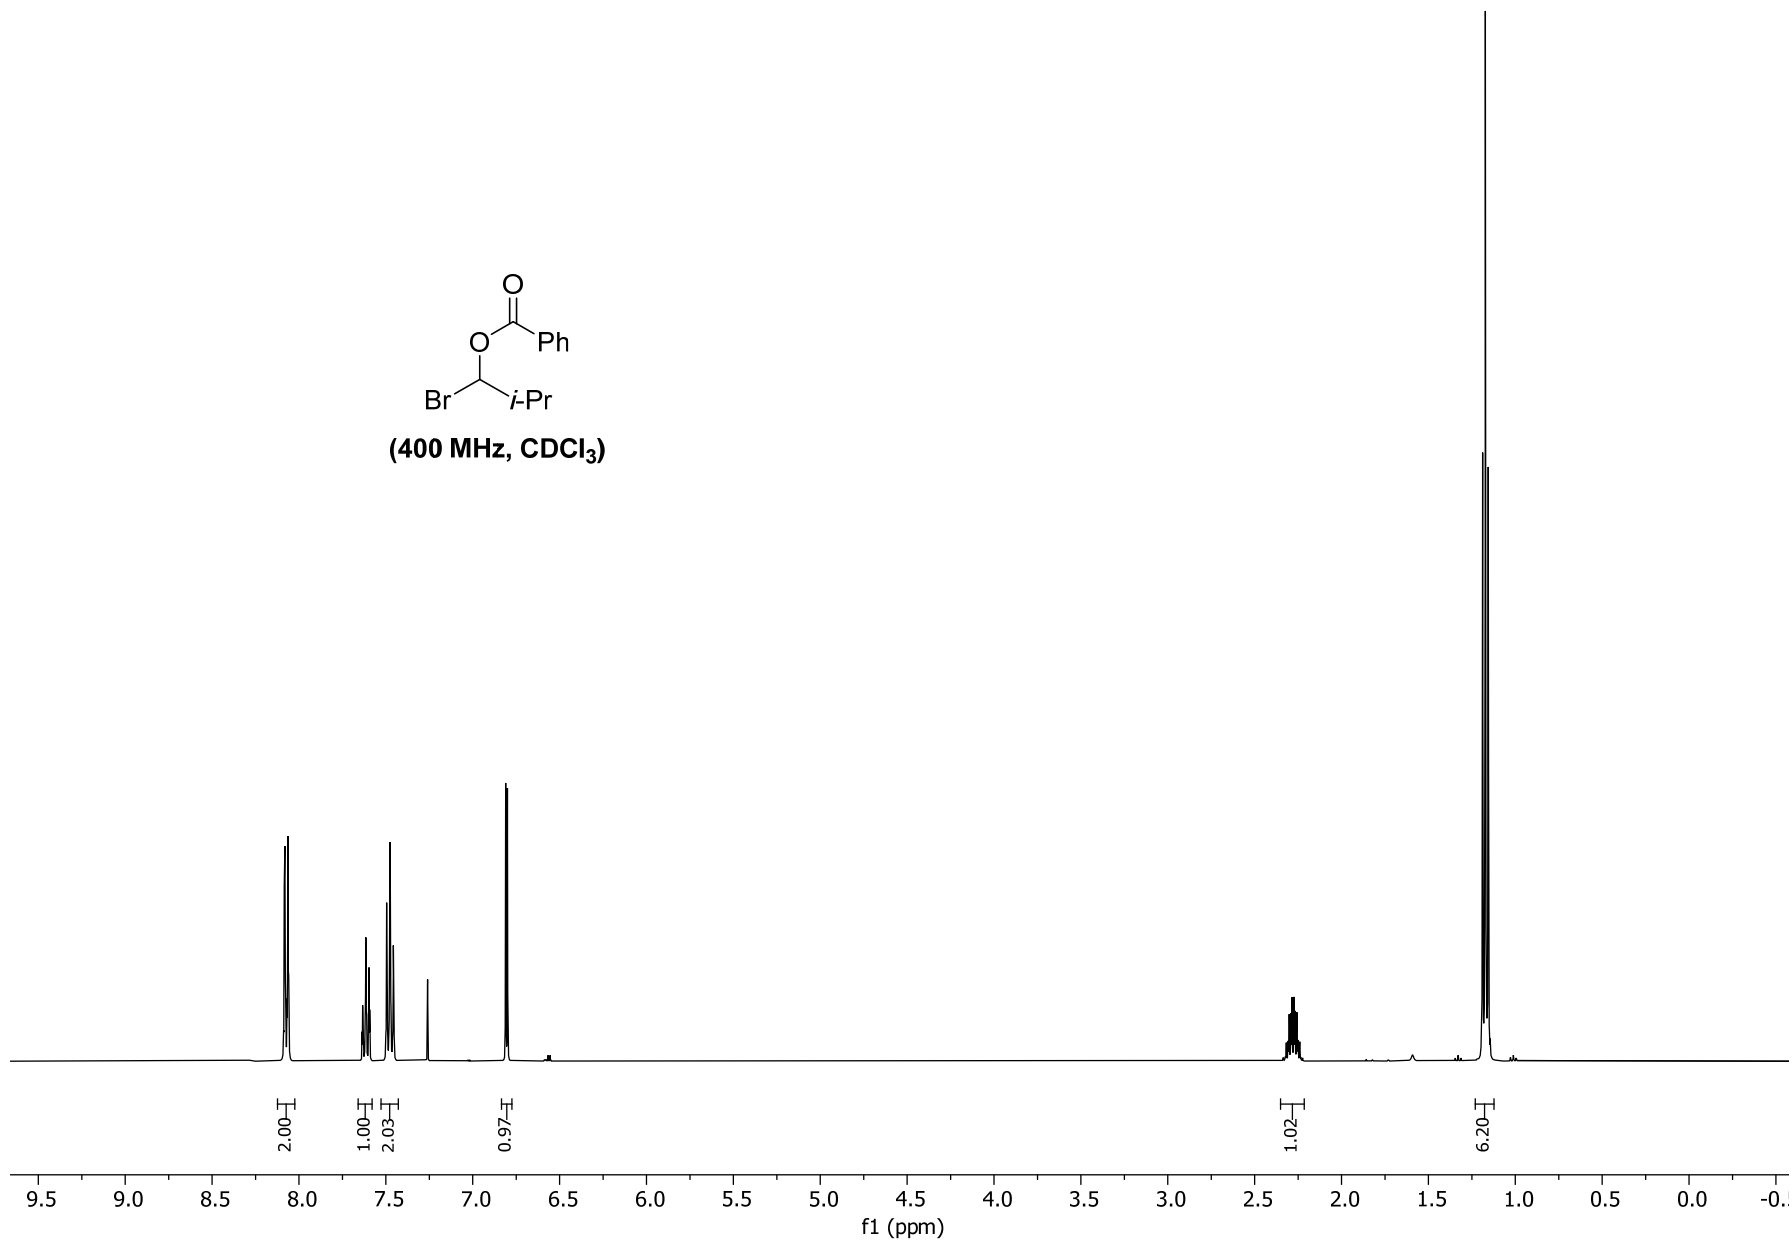

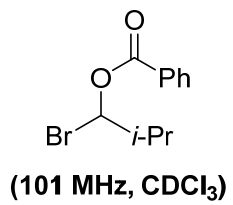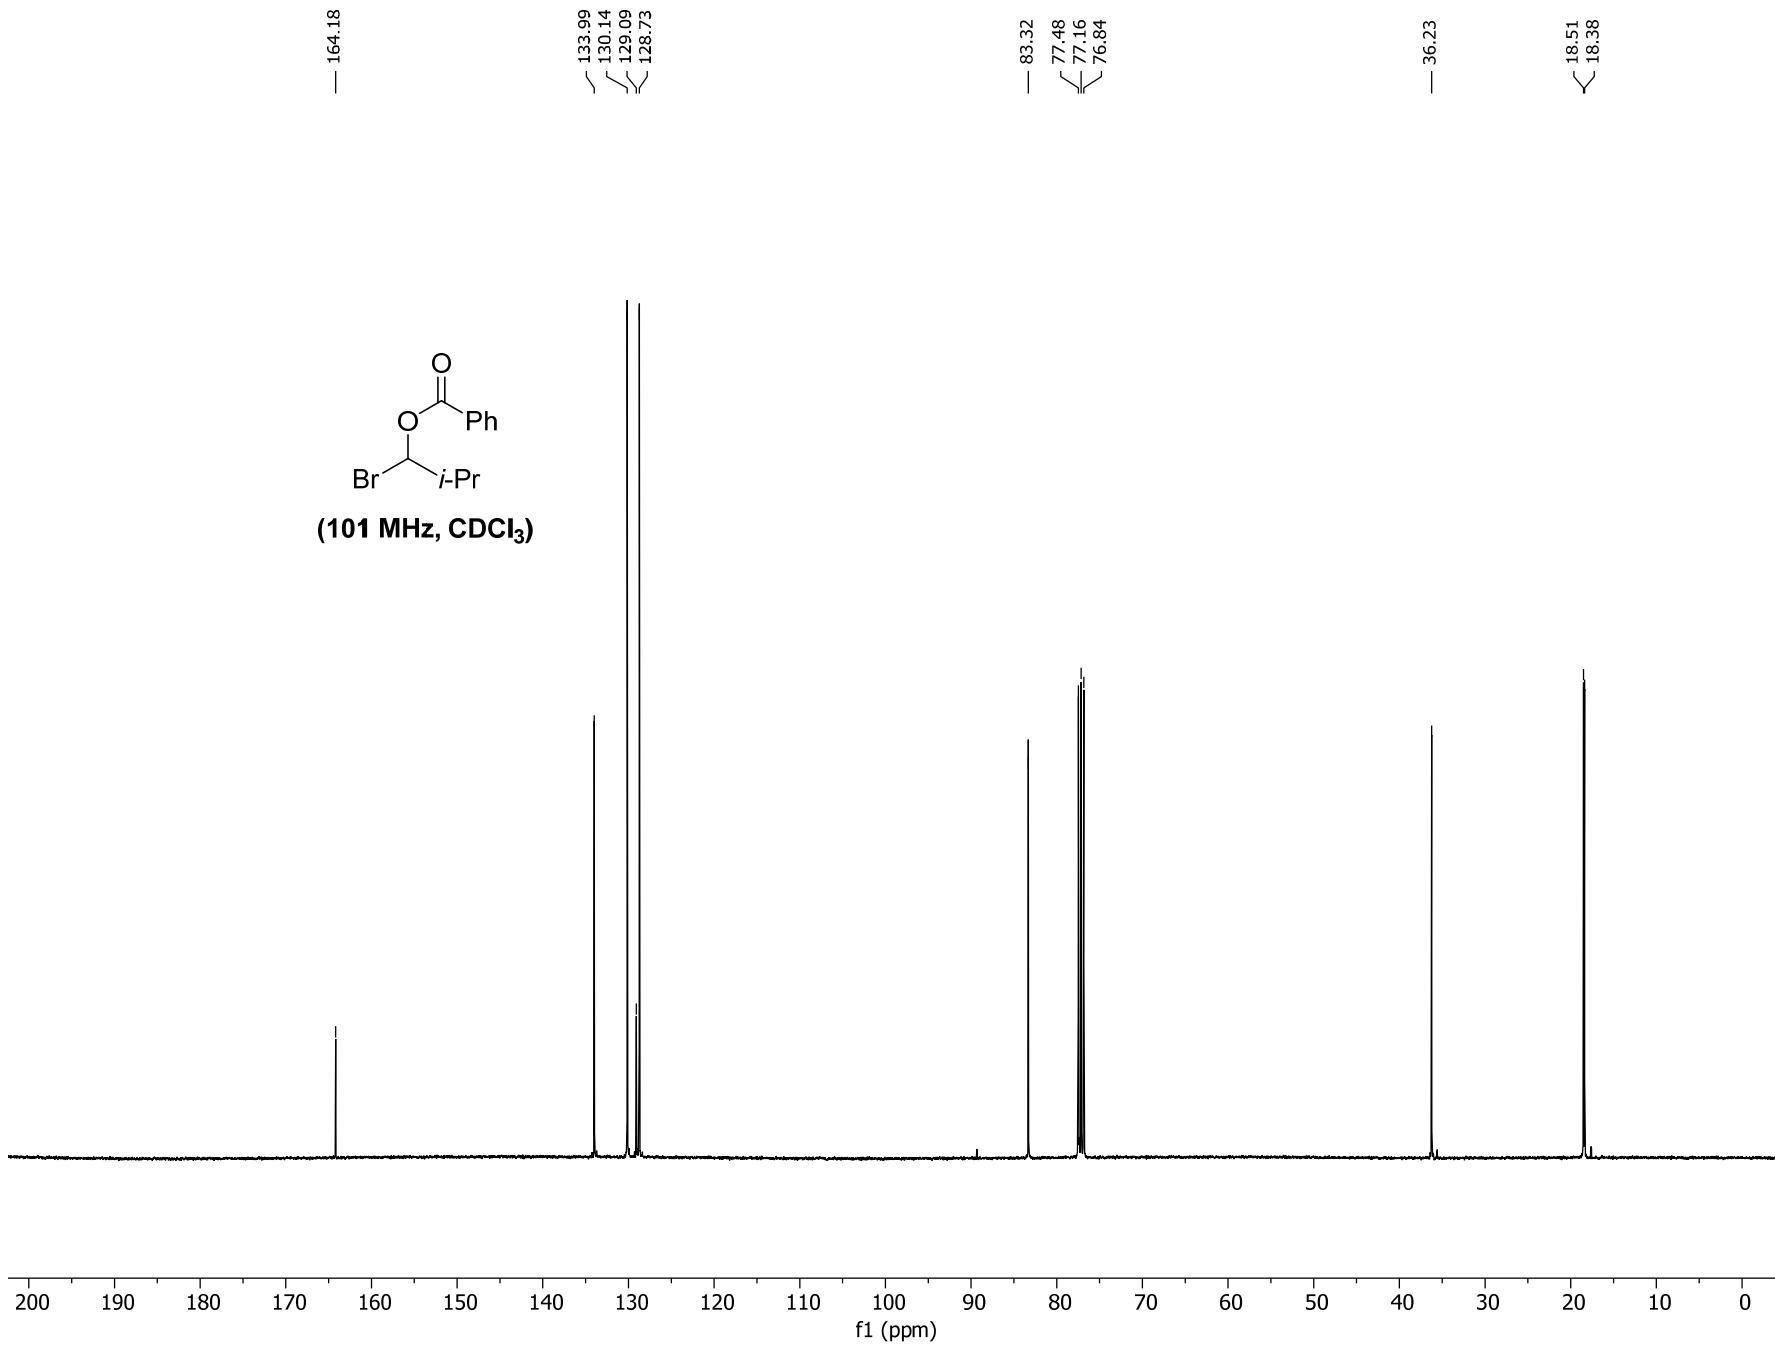



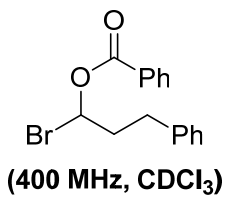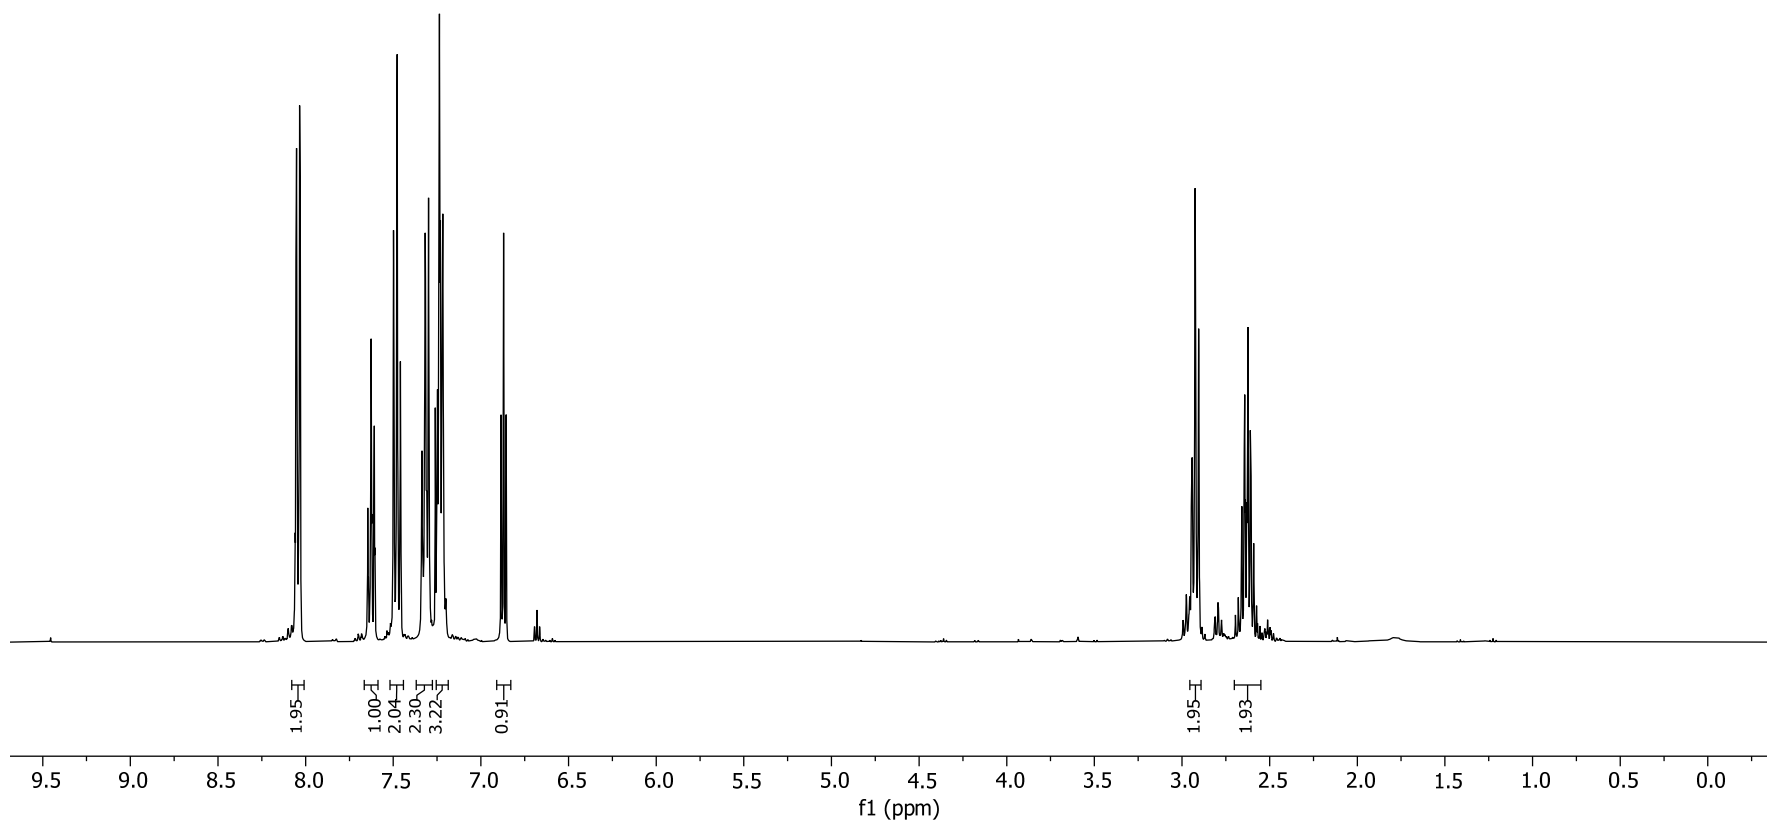

S-185

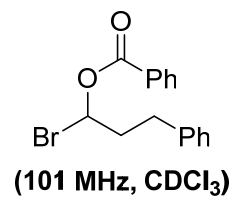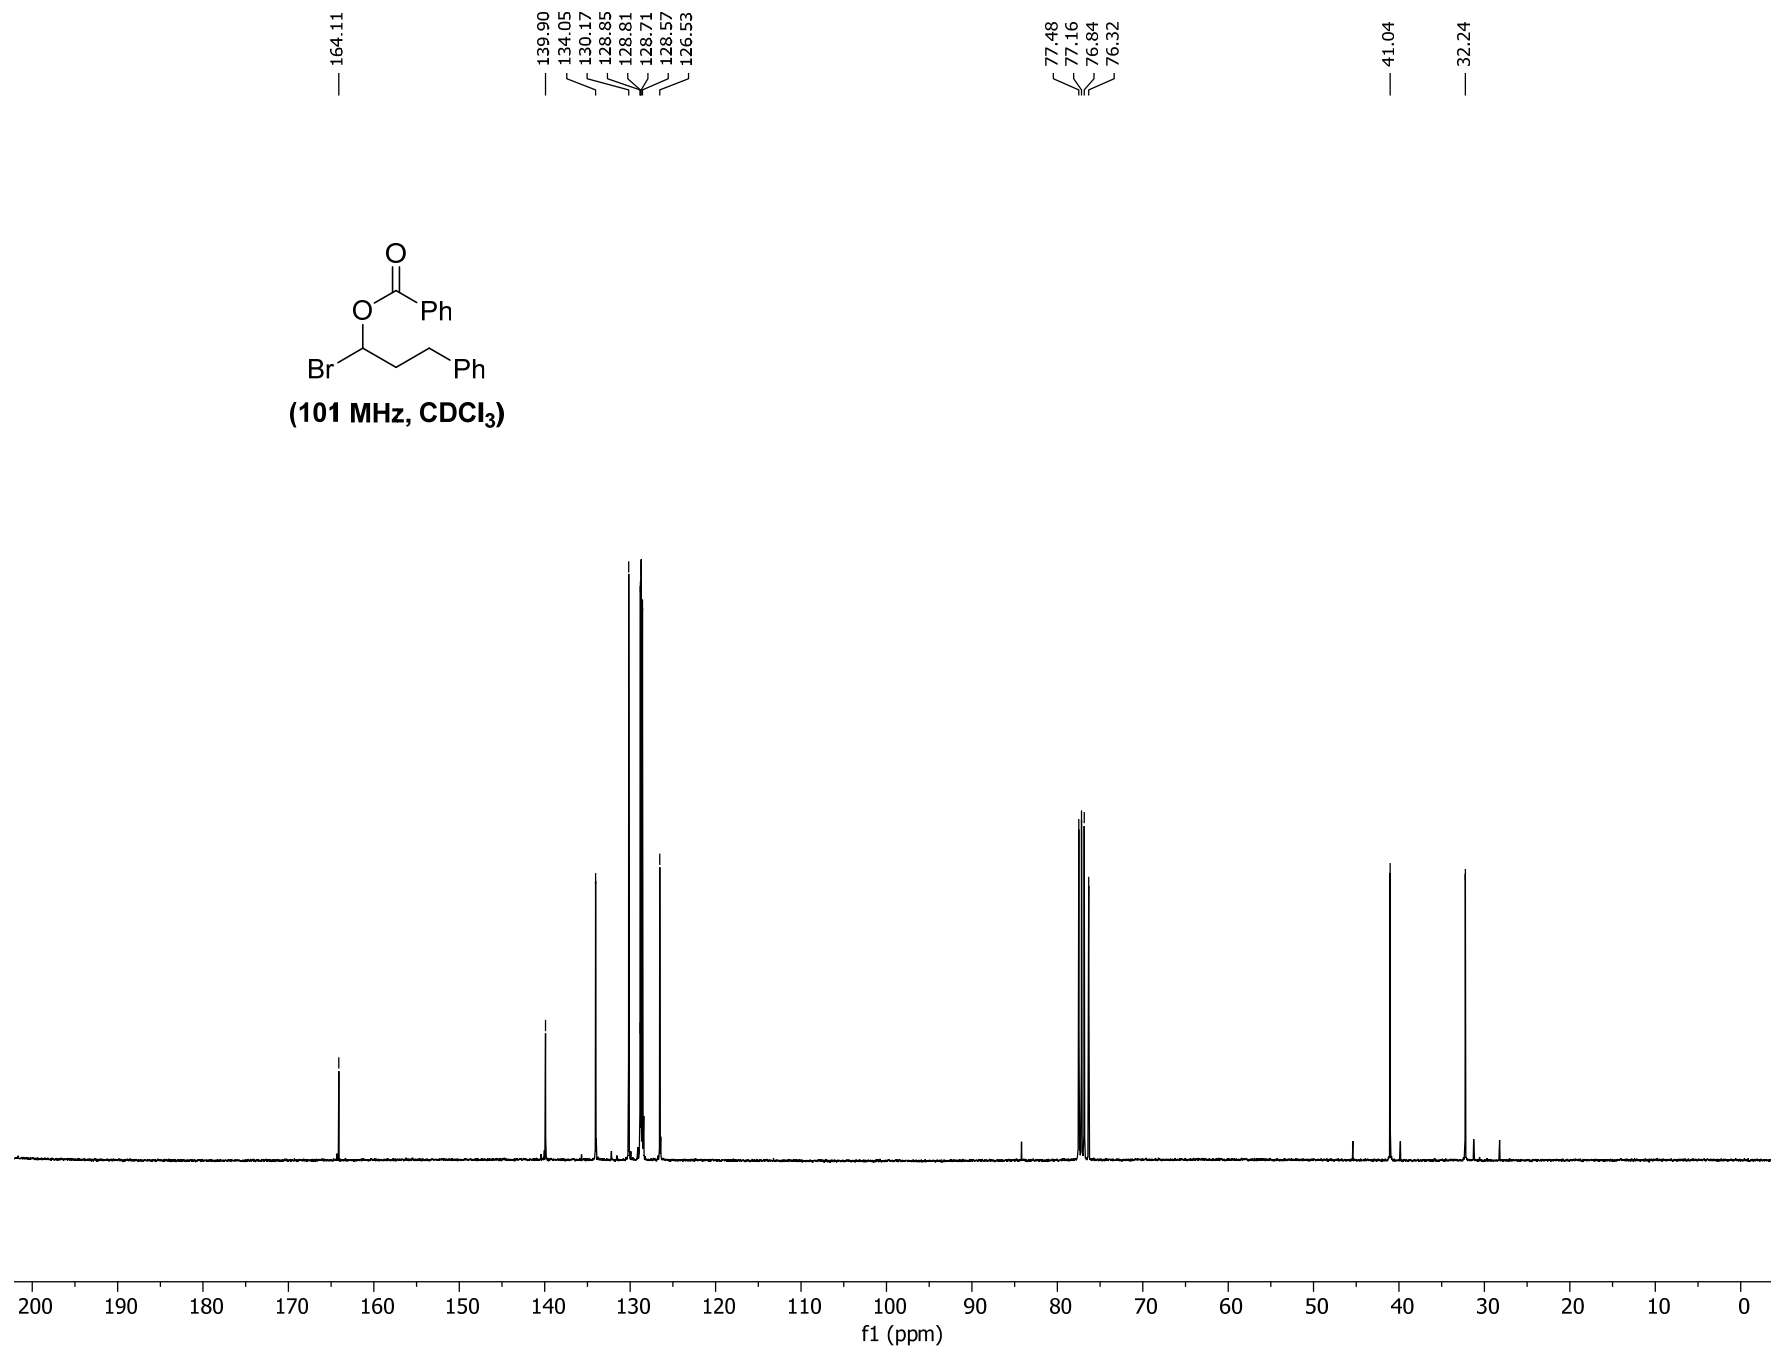

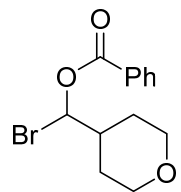

(400 MHz, CDCl<sub>3</sub>)

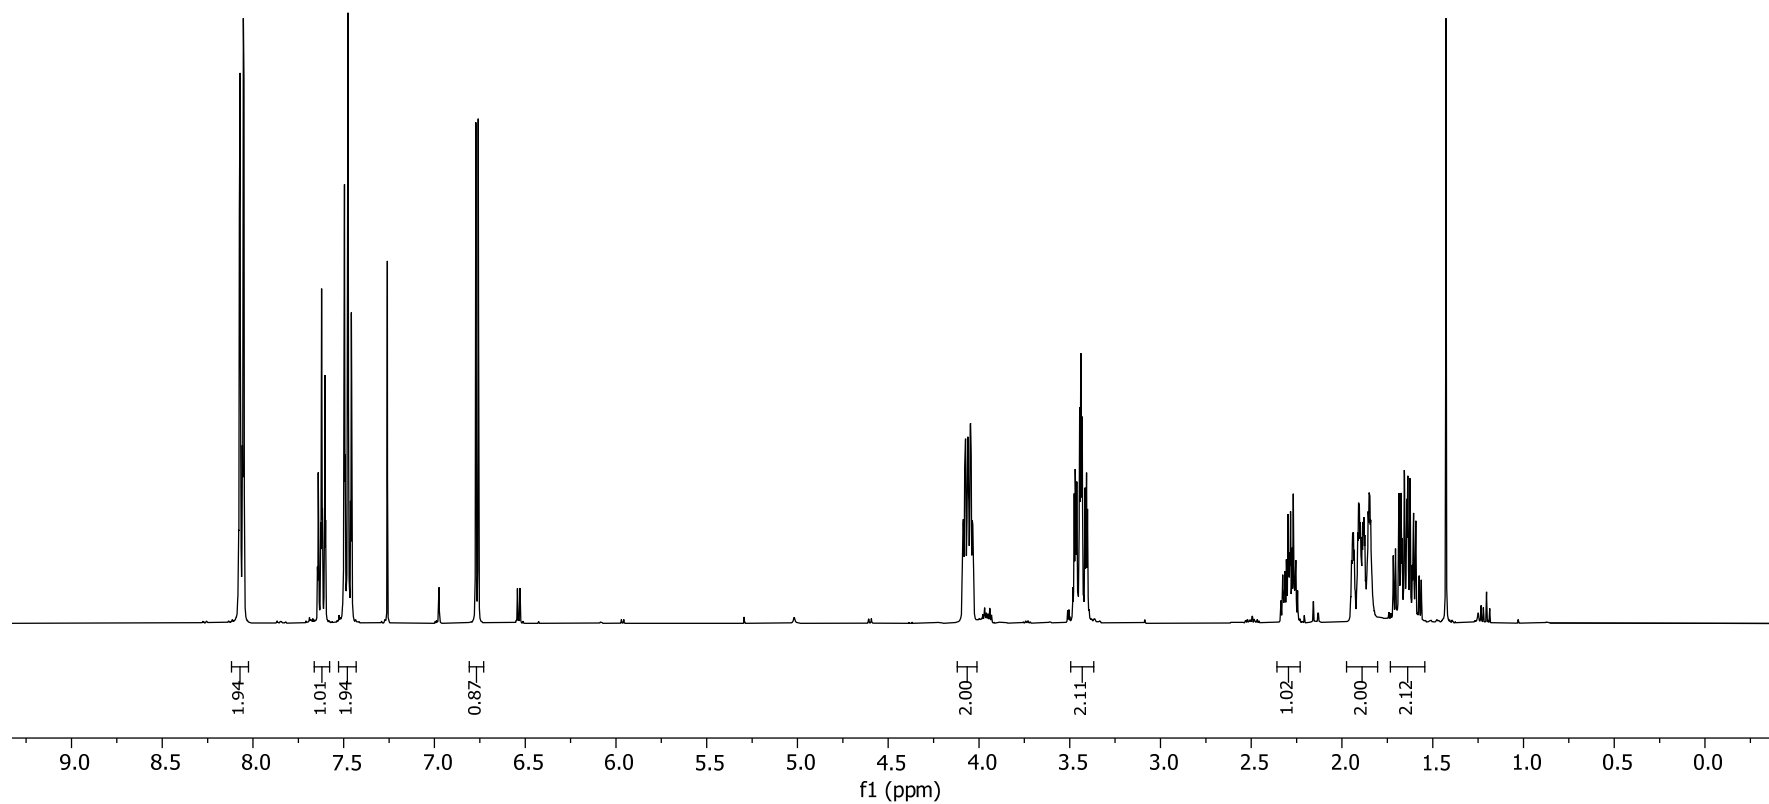

S-187

— 164.12

134.15  
130.15  
130.12  
128.78

80.53  
77.48  
77.16  
76.84

67.42  
67.39

— 43.29

29.52  
28.72

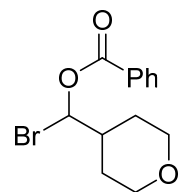

(101 MHz, CDCl<sub>3</sub>)

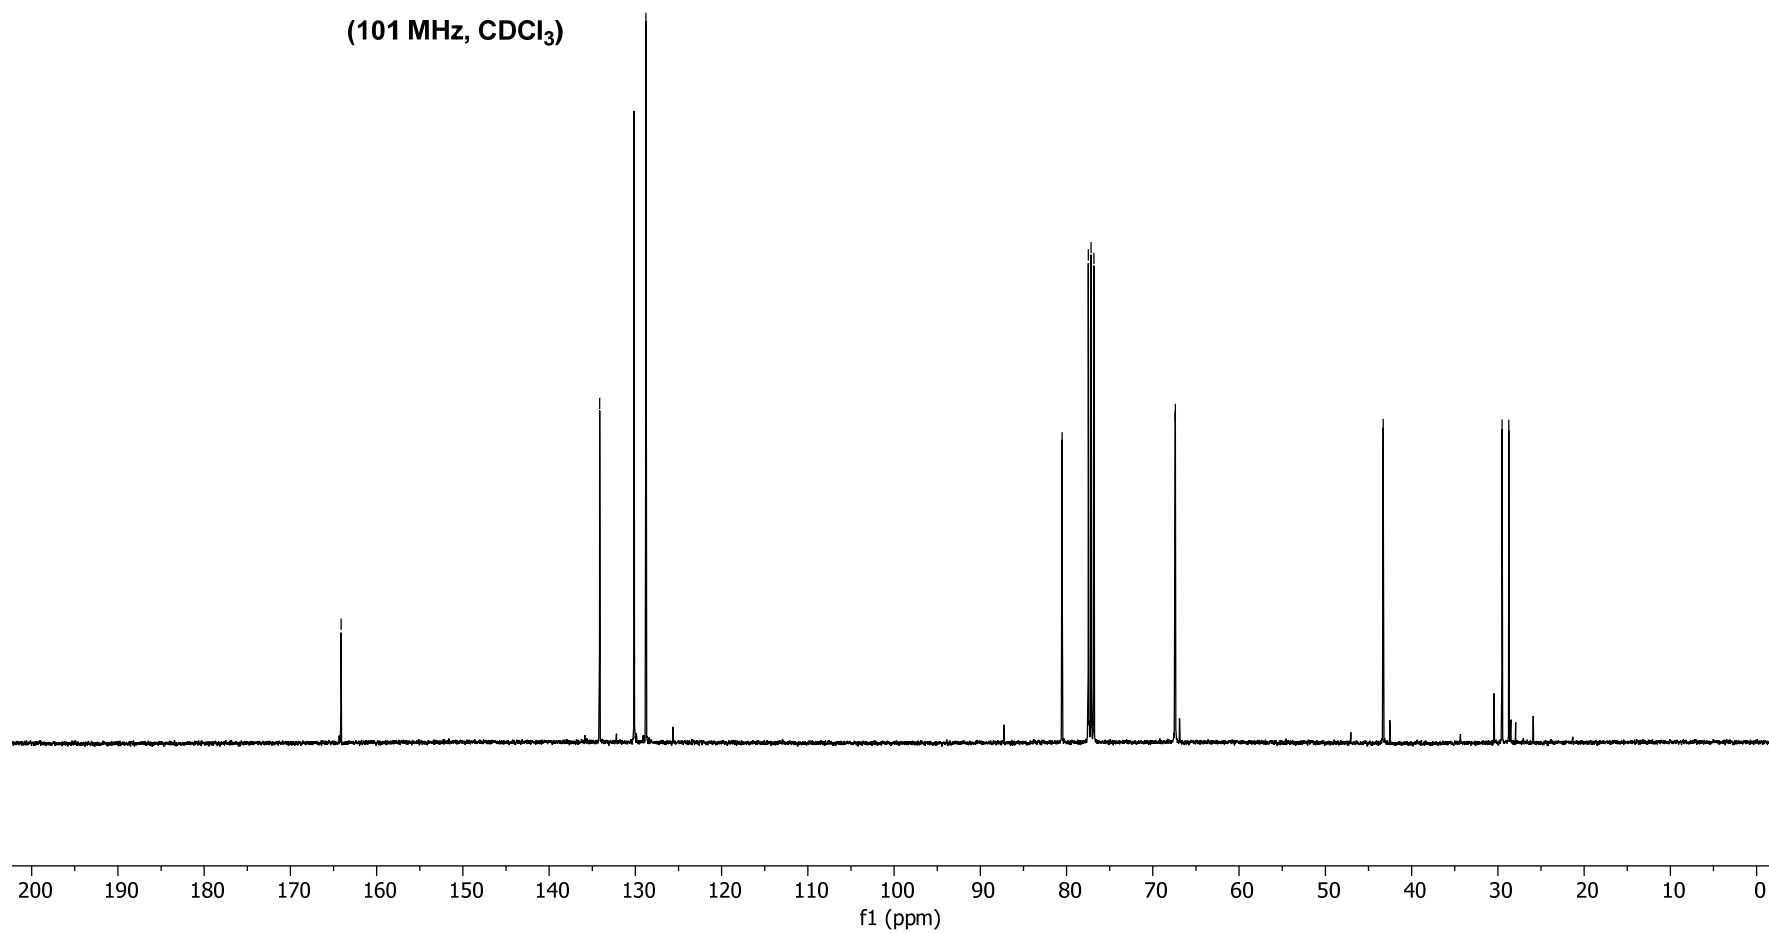

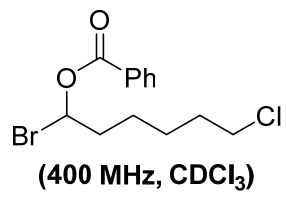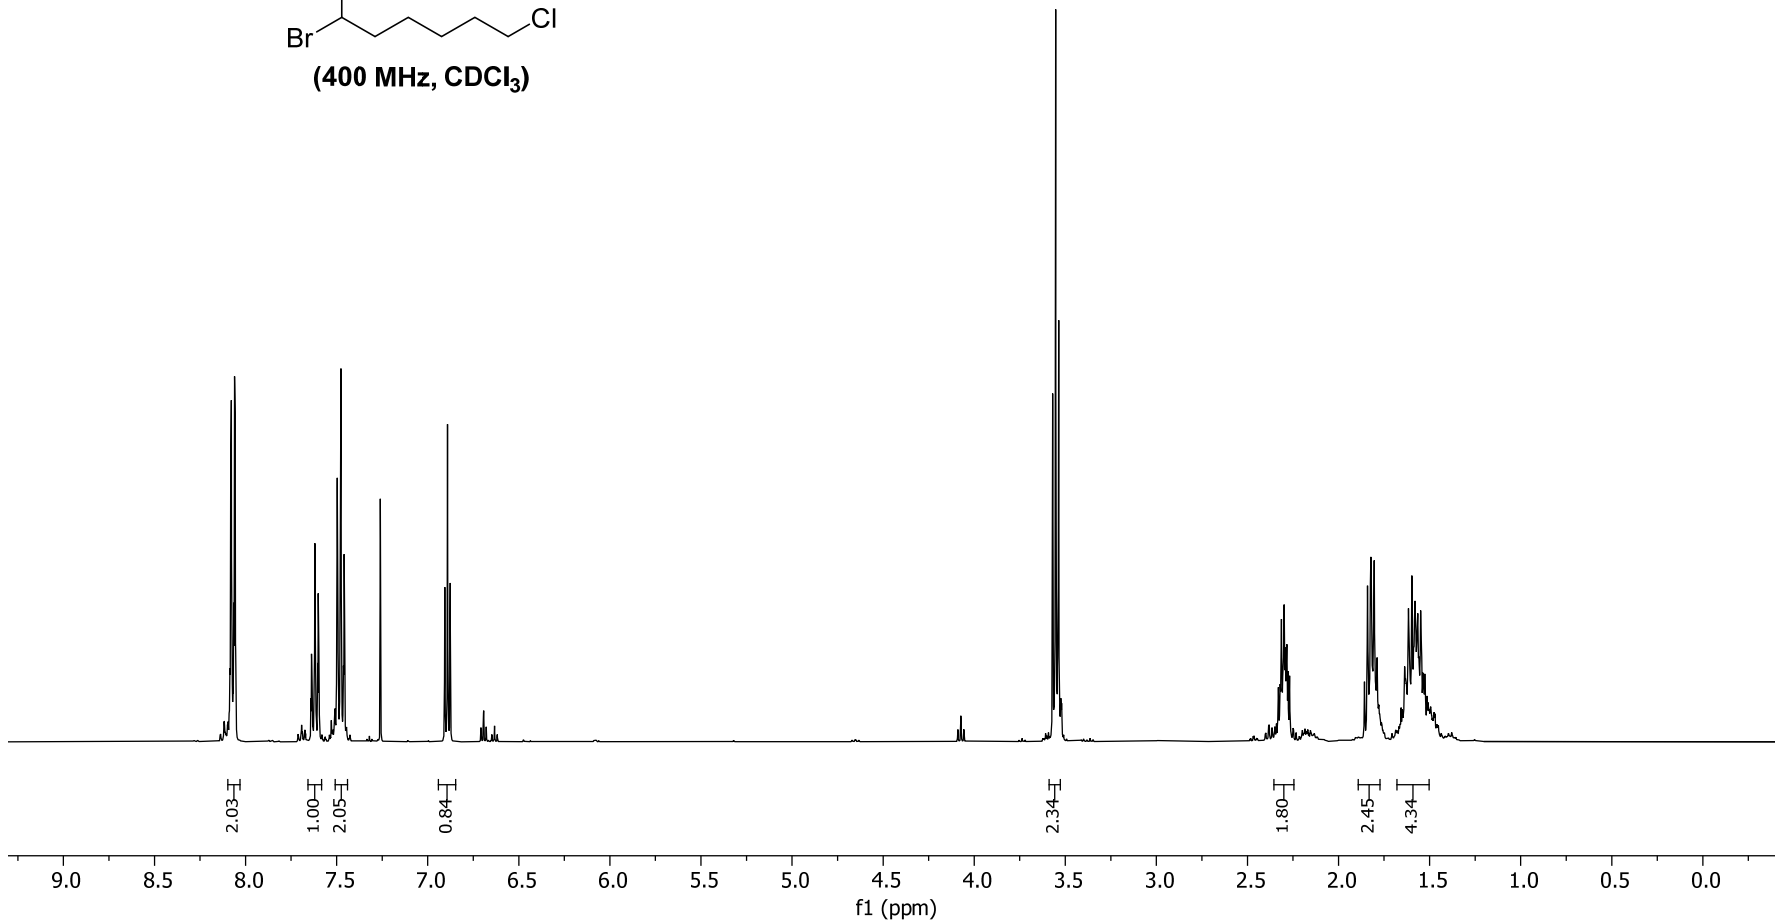

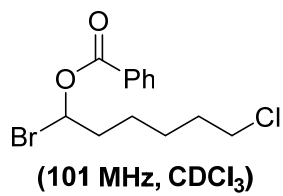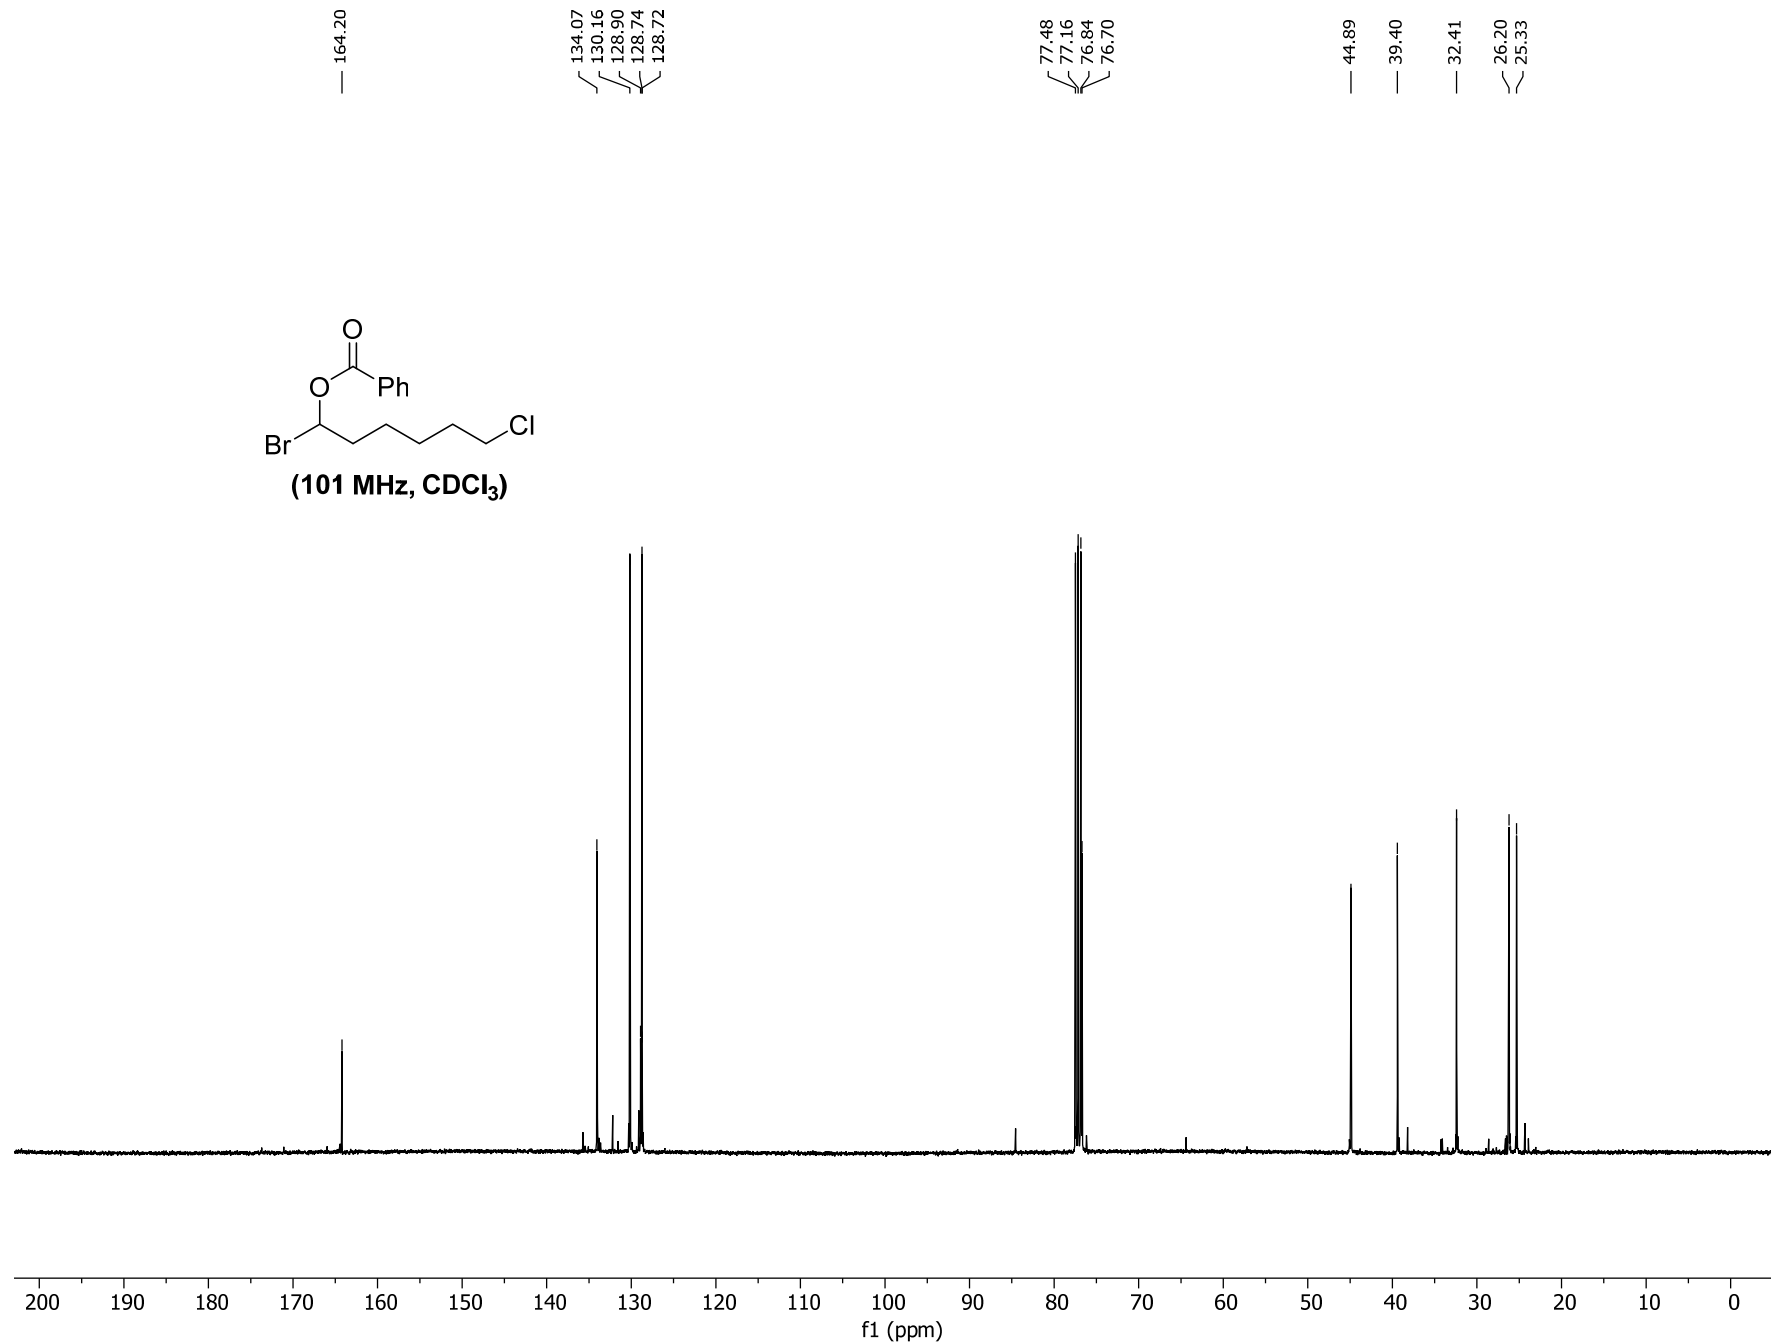

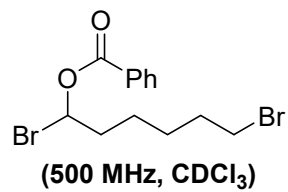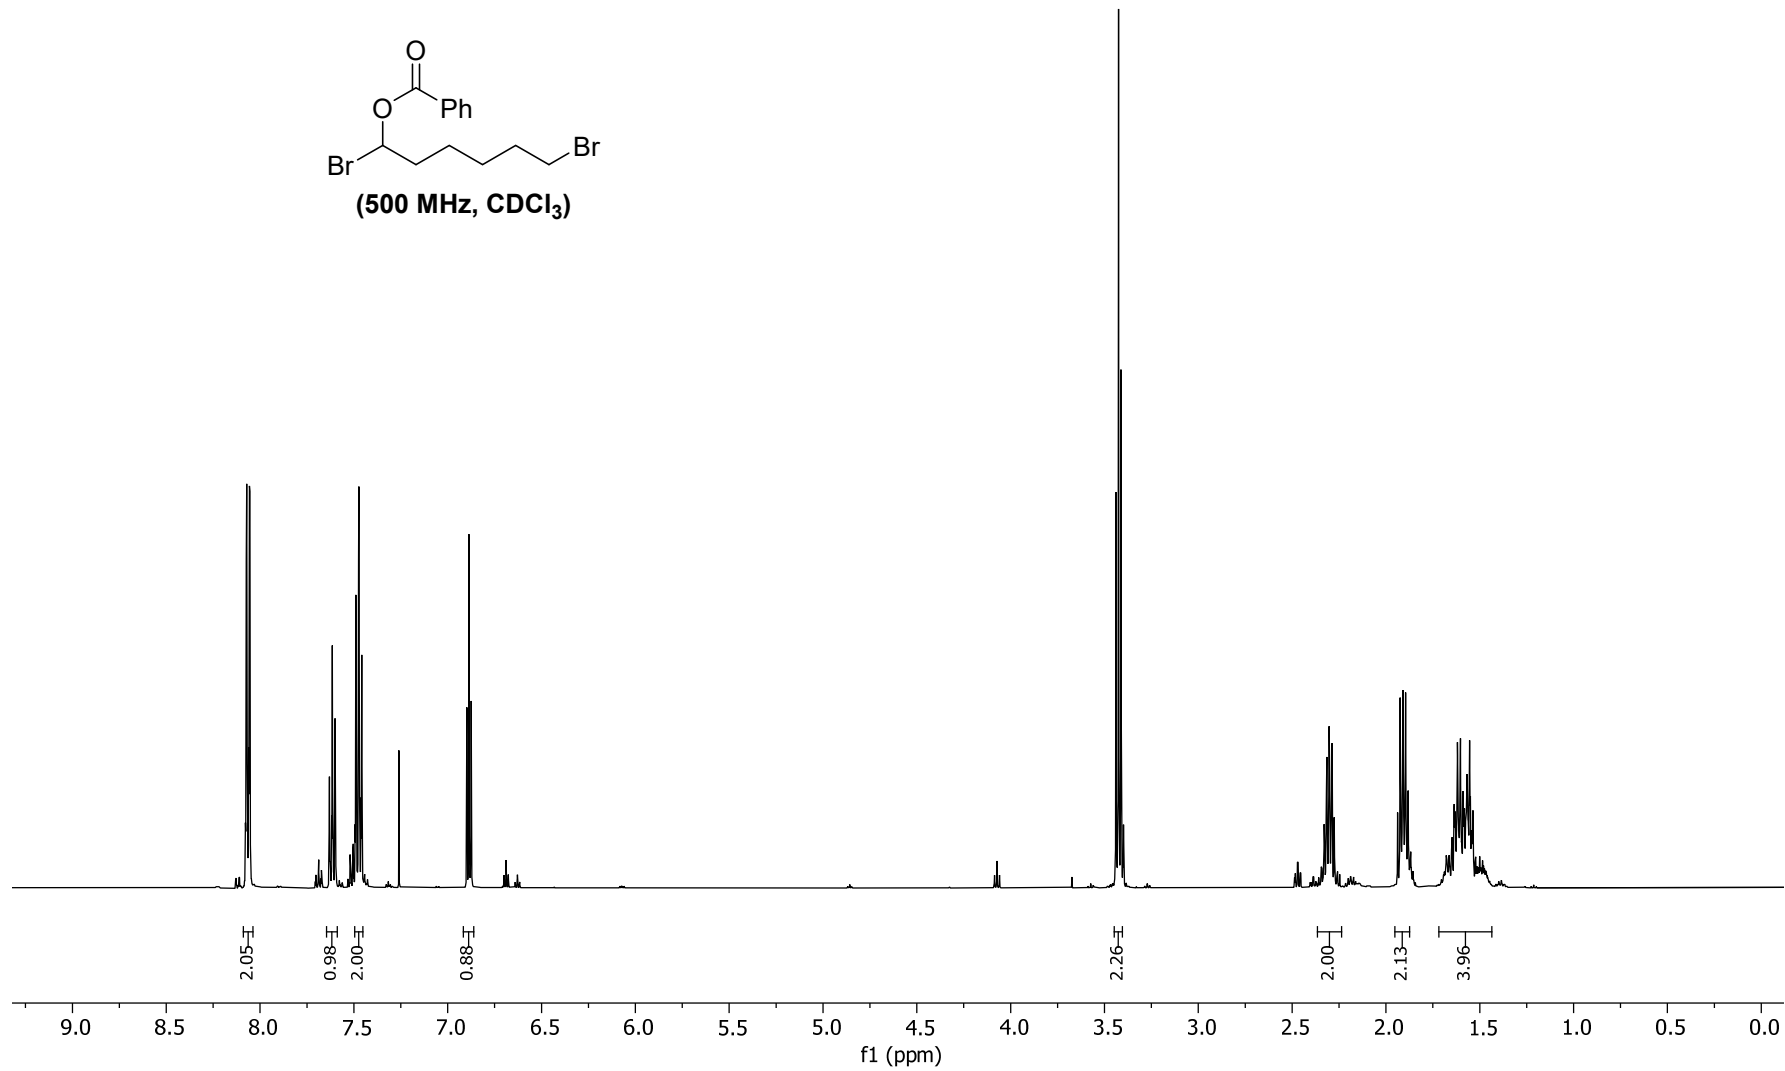

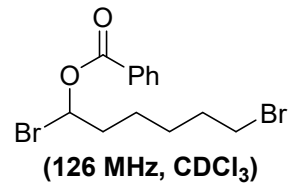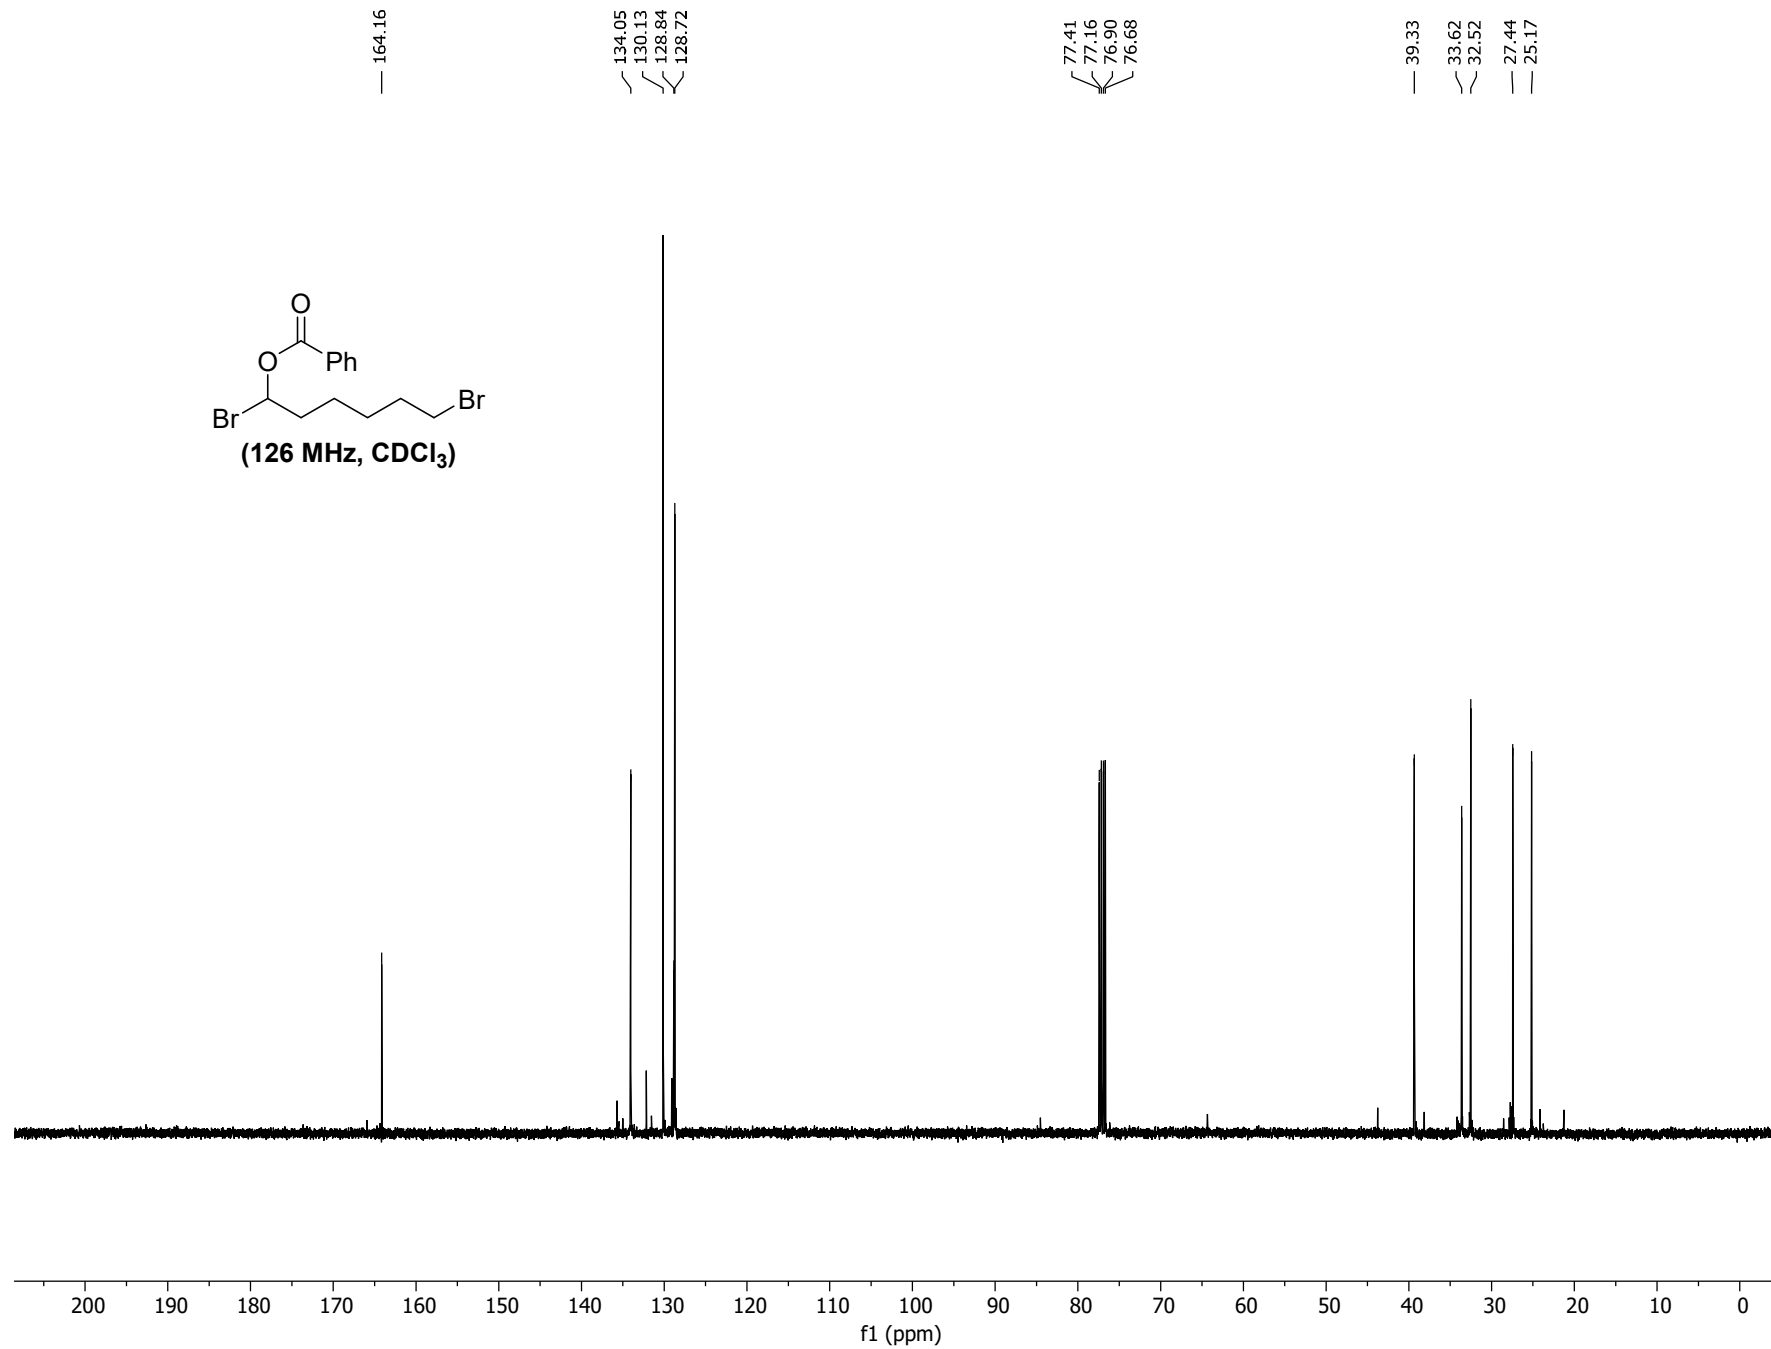



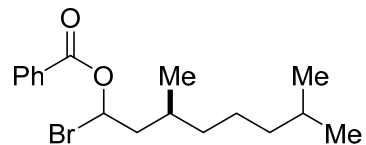

(400 MHz, CDCl<sub>3</sub>)

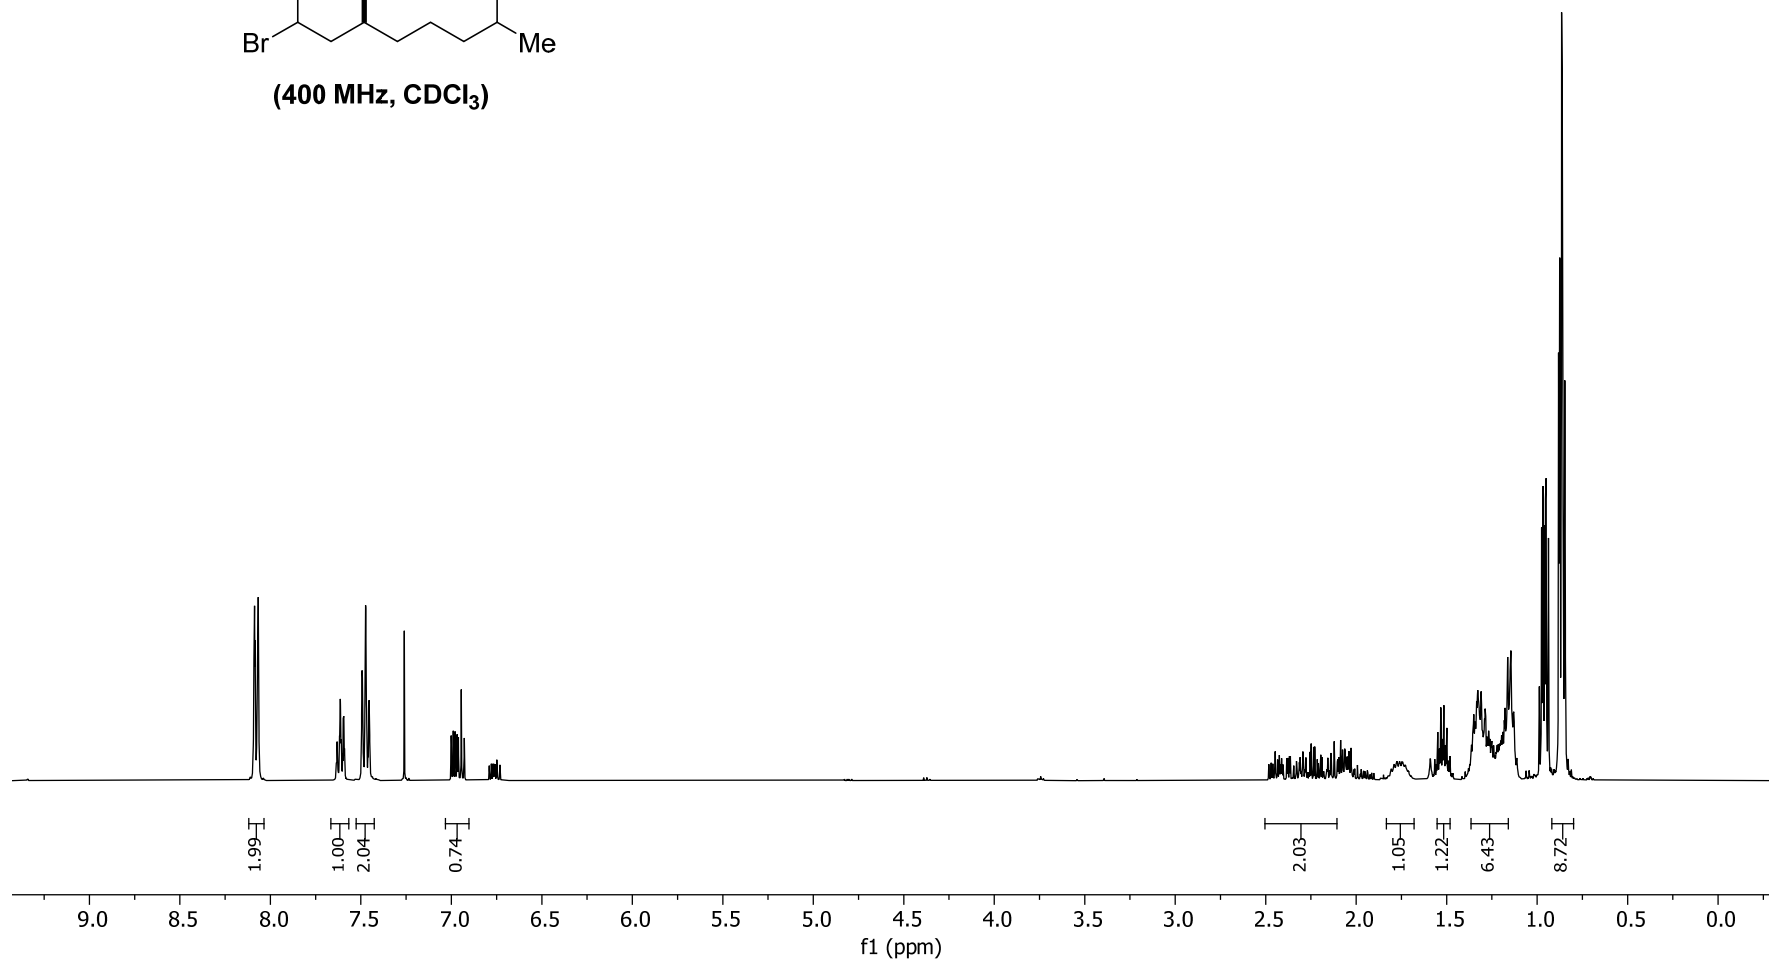

S-193

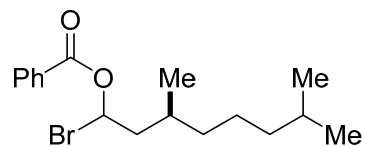

(101 MHz, CDCl<sub>3</sub>)

164.33  
164.26

134.02  
134.00  
130.18  
130.15  
128.73  
128.71

77.48  
77.16  
76.84  
76.62  
75.72

51.24  
47.03  
46.54  
39.17  
37.27  
37.04  
36.80  
30.77  
28.31  
28.05  
24.81  
24.56  
24.52  
22.79  
22.72  
20.12  
19.52  
19.28

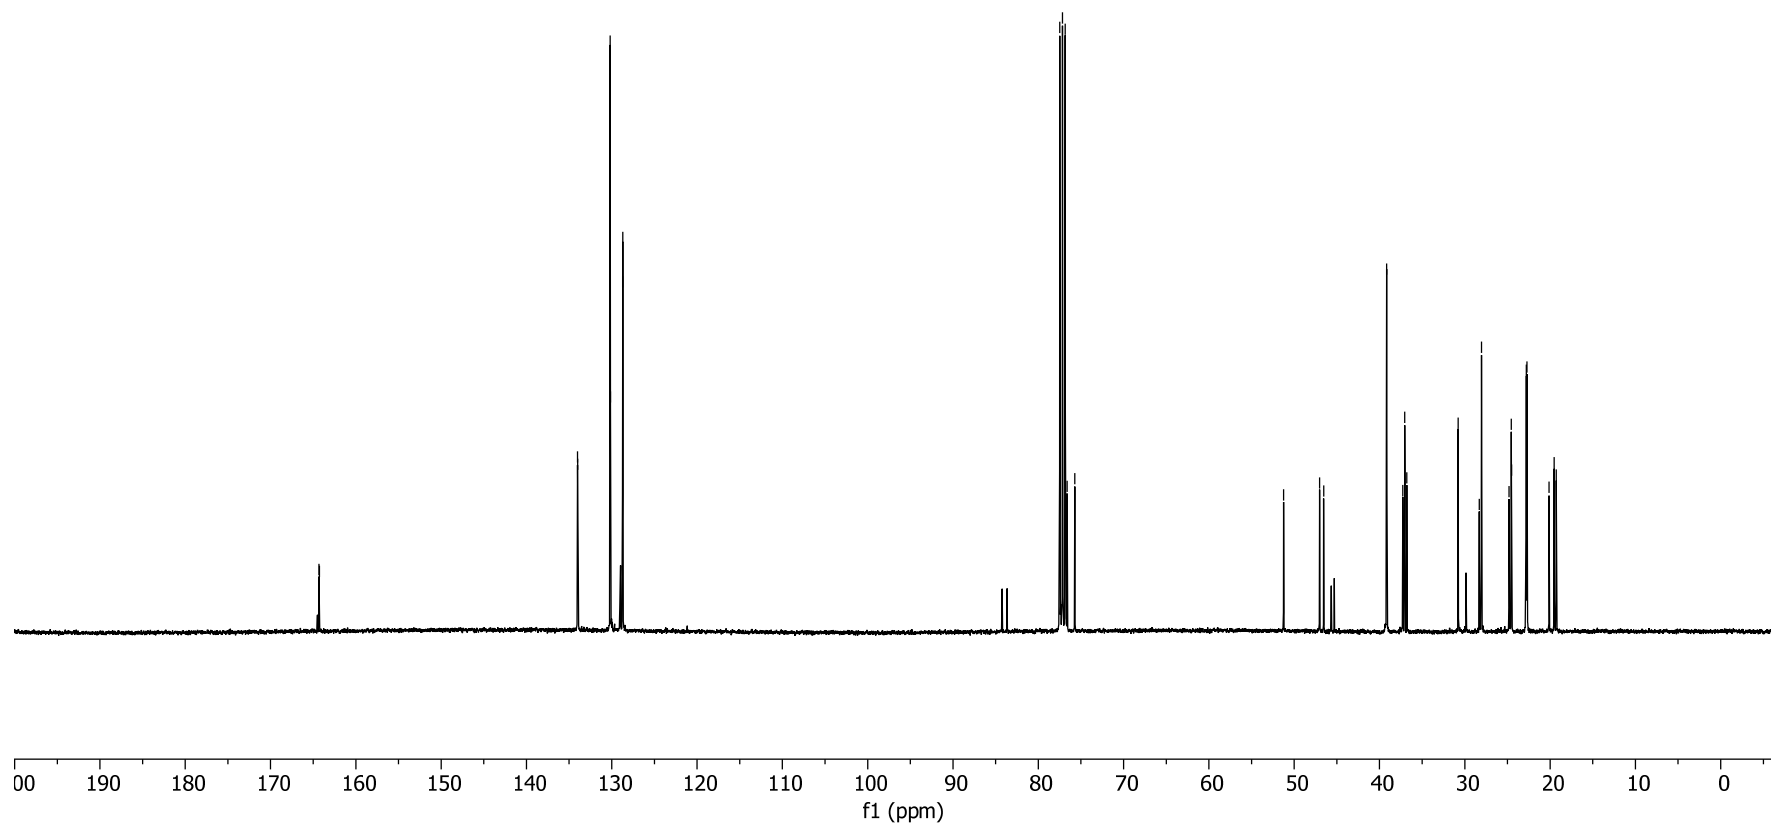

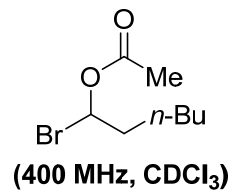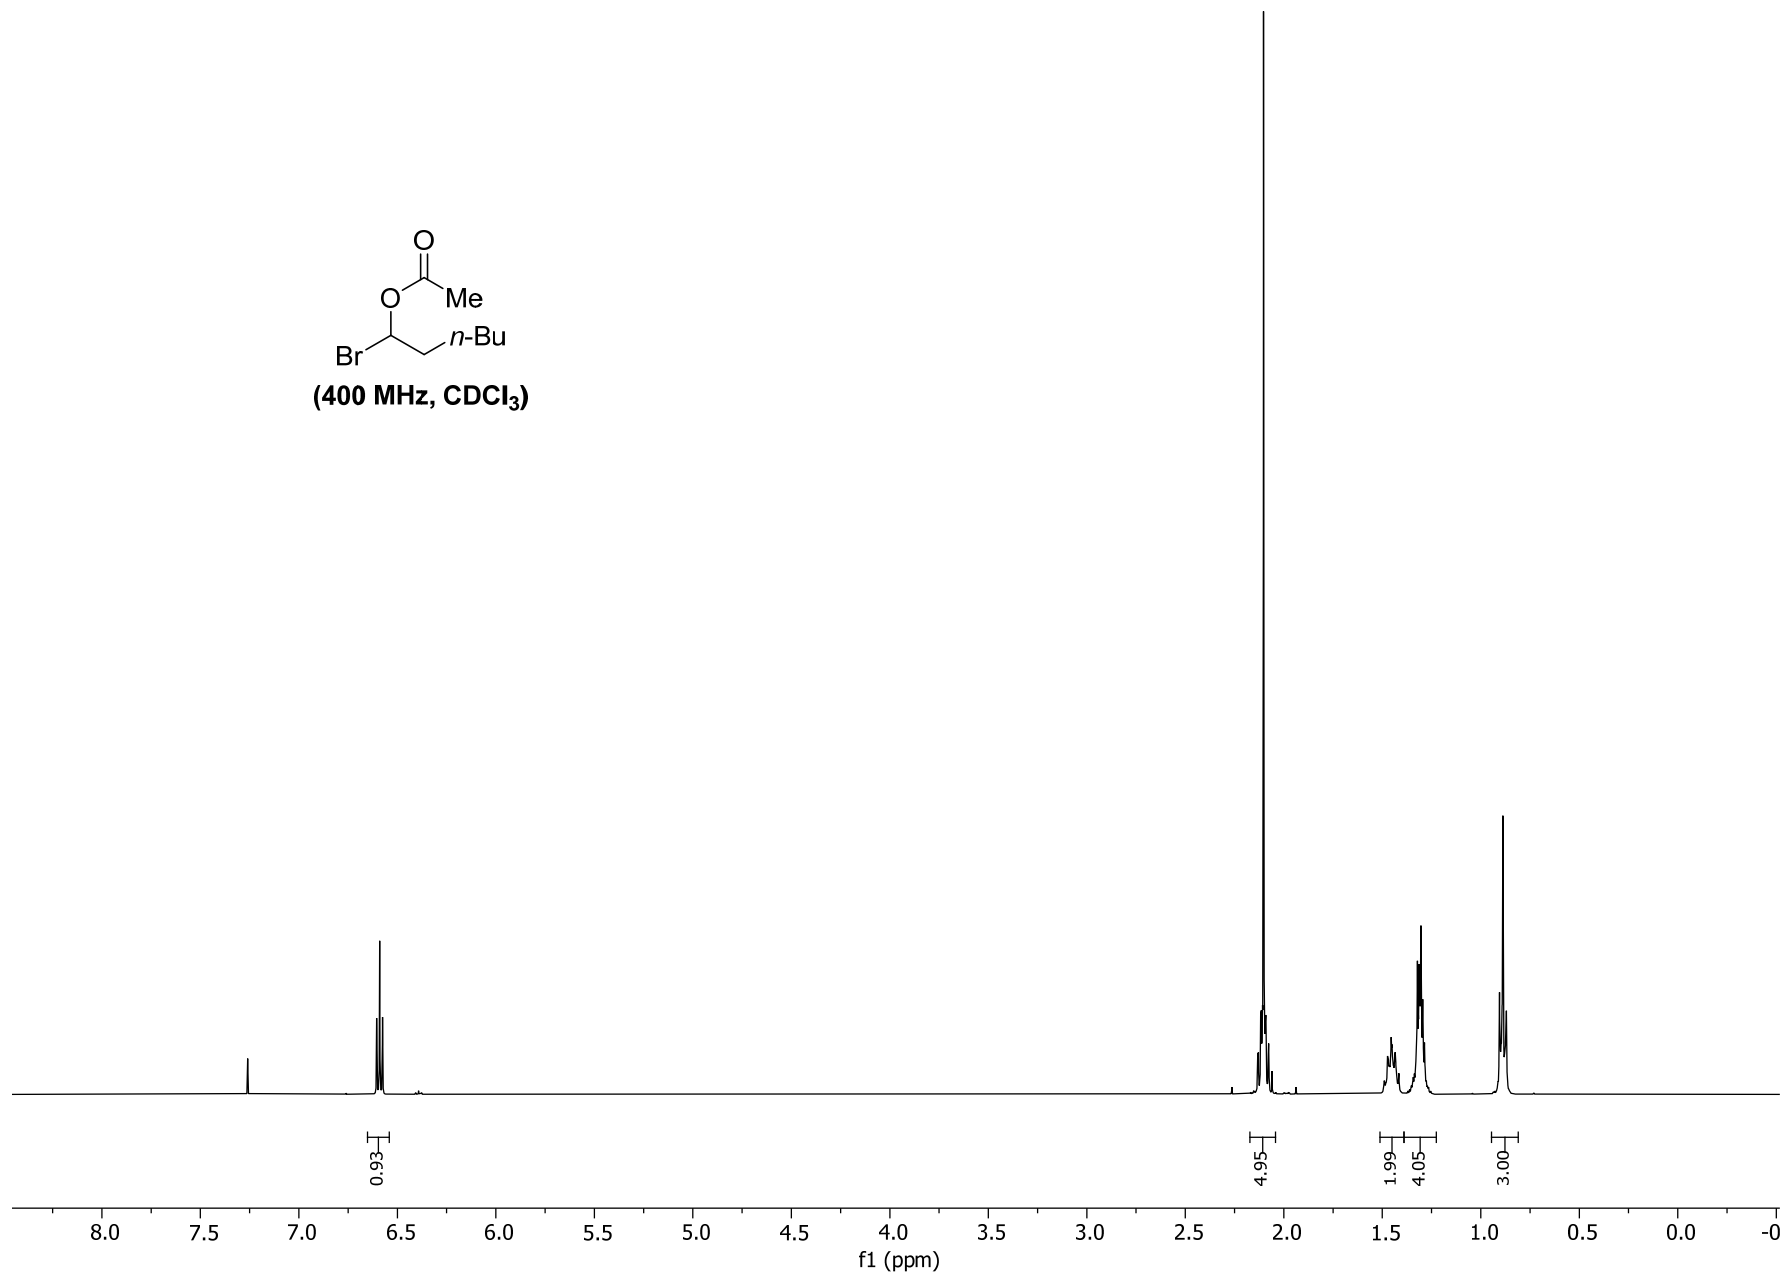

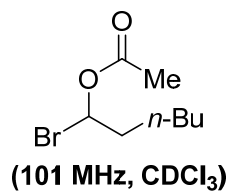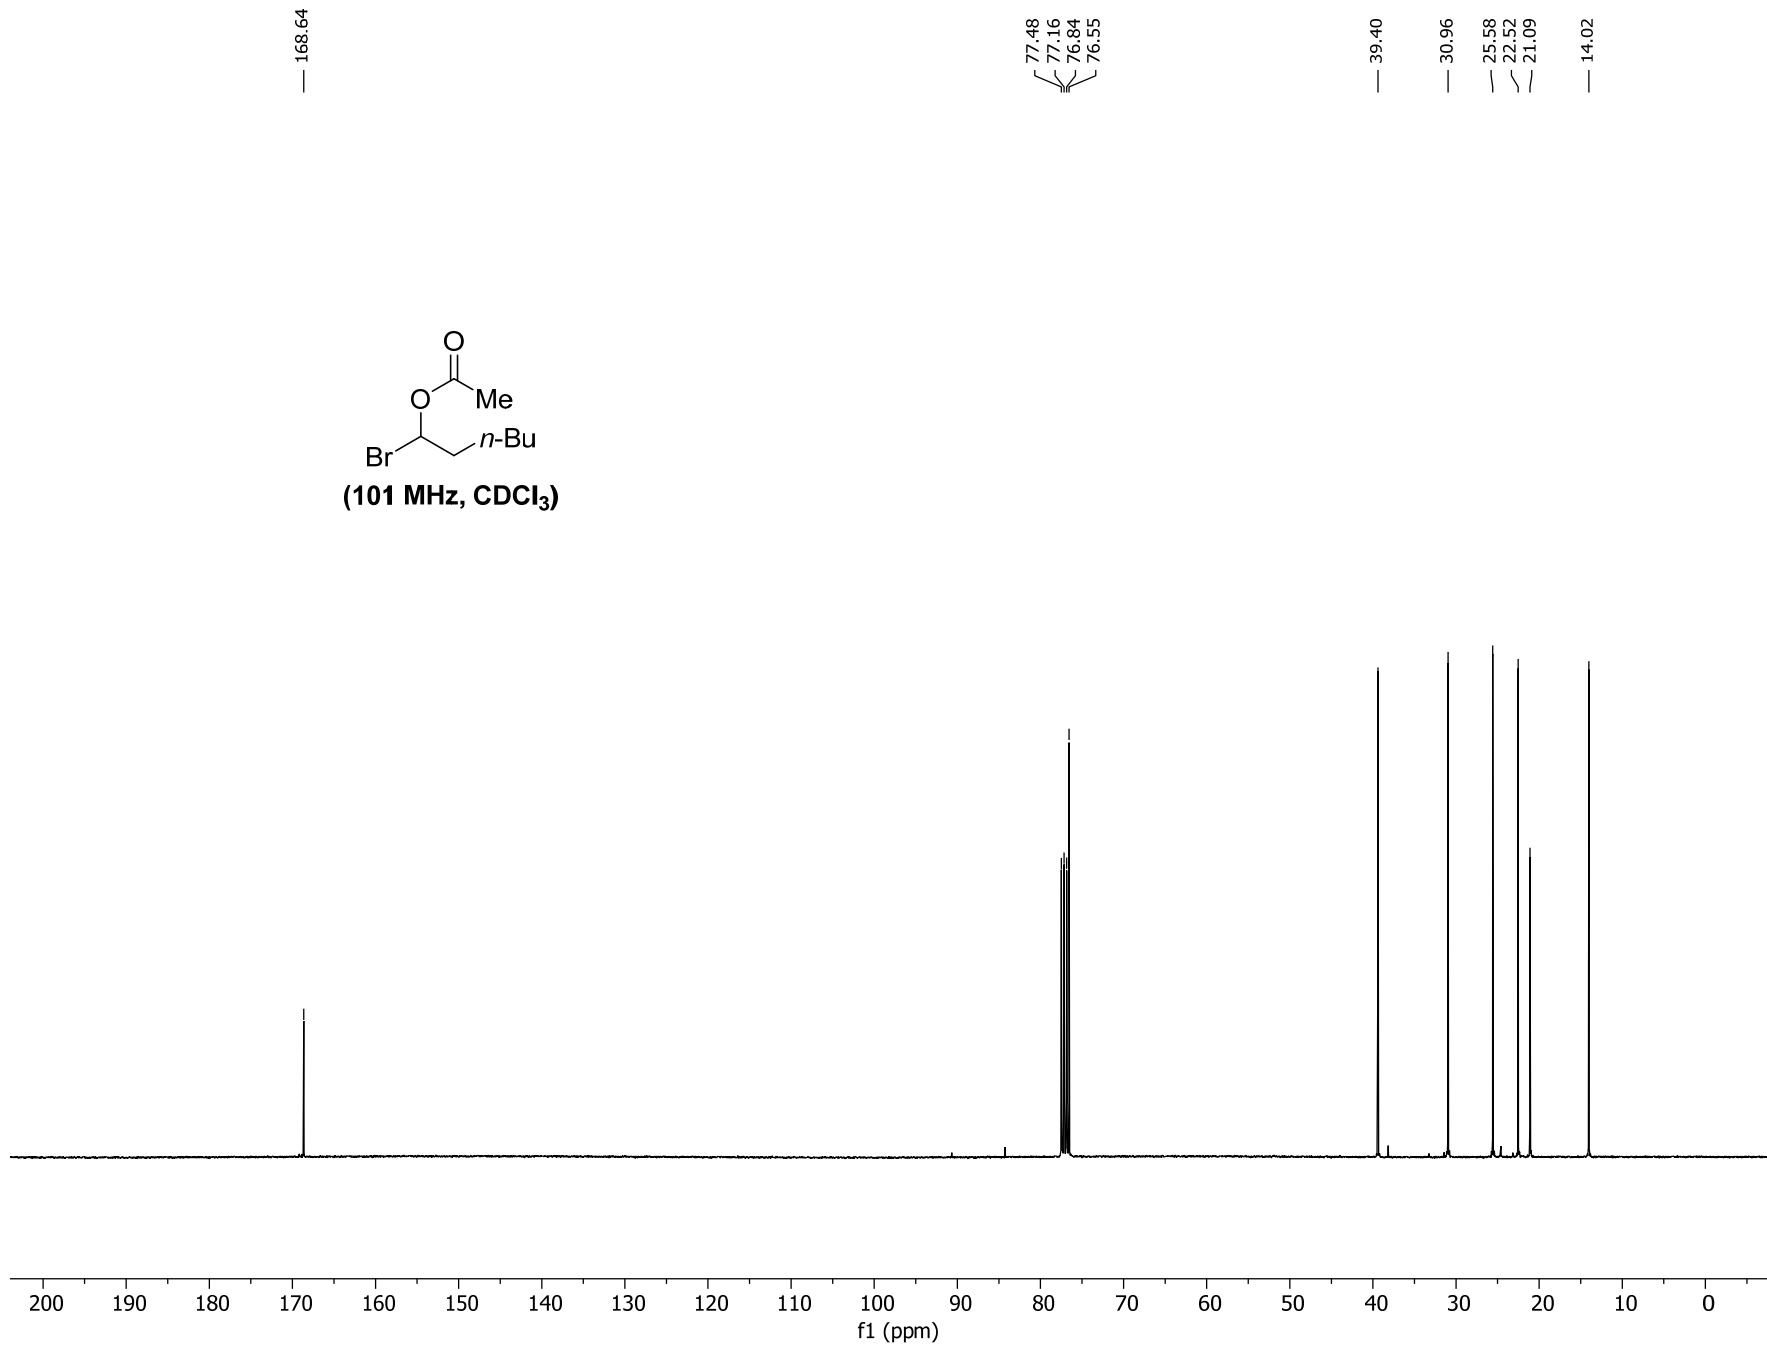

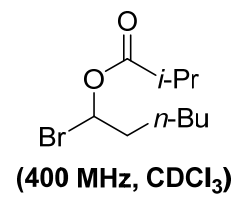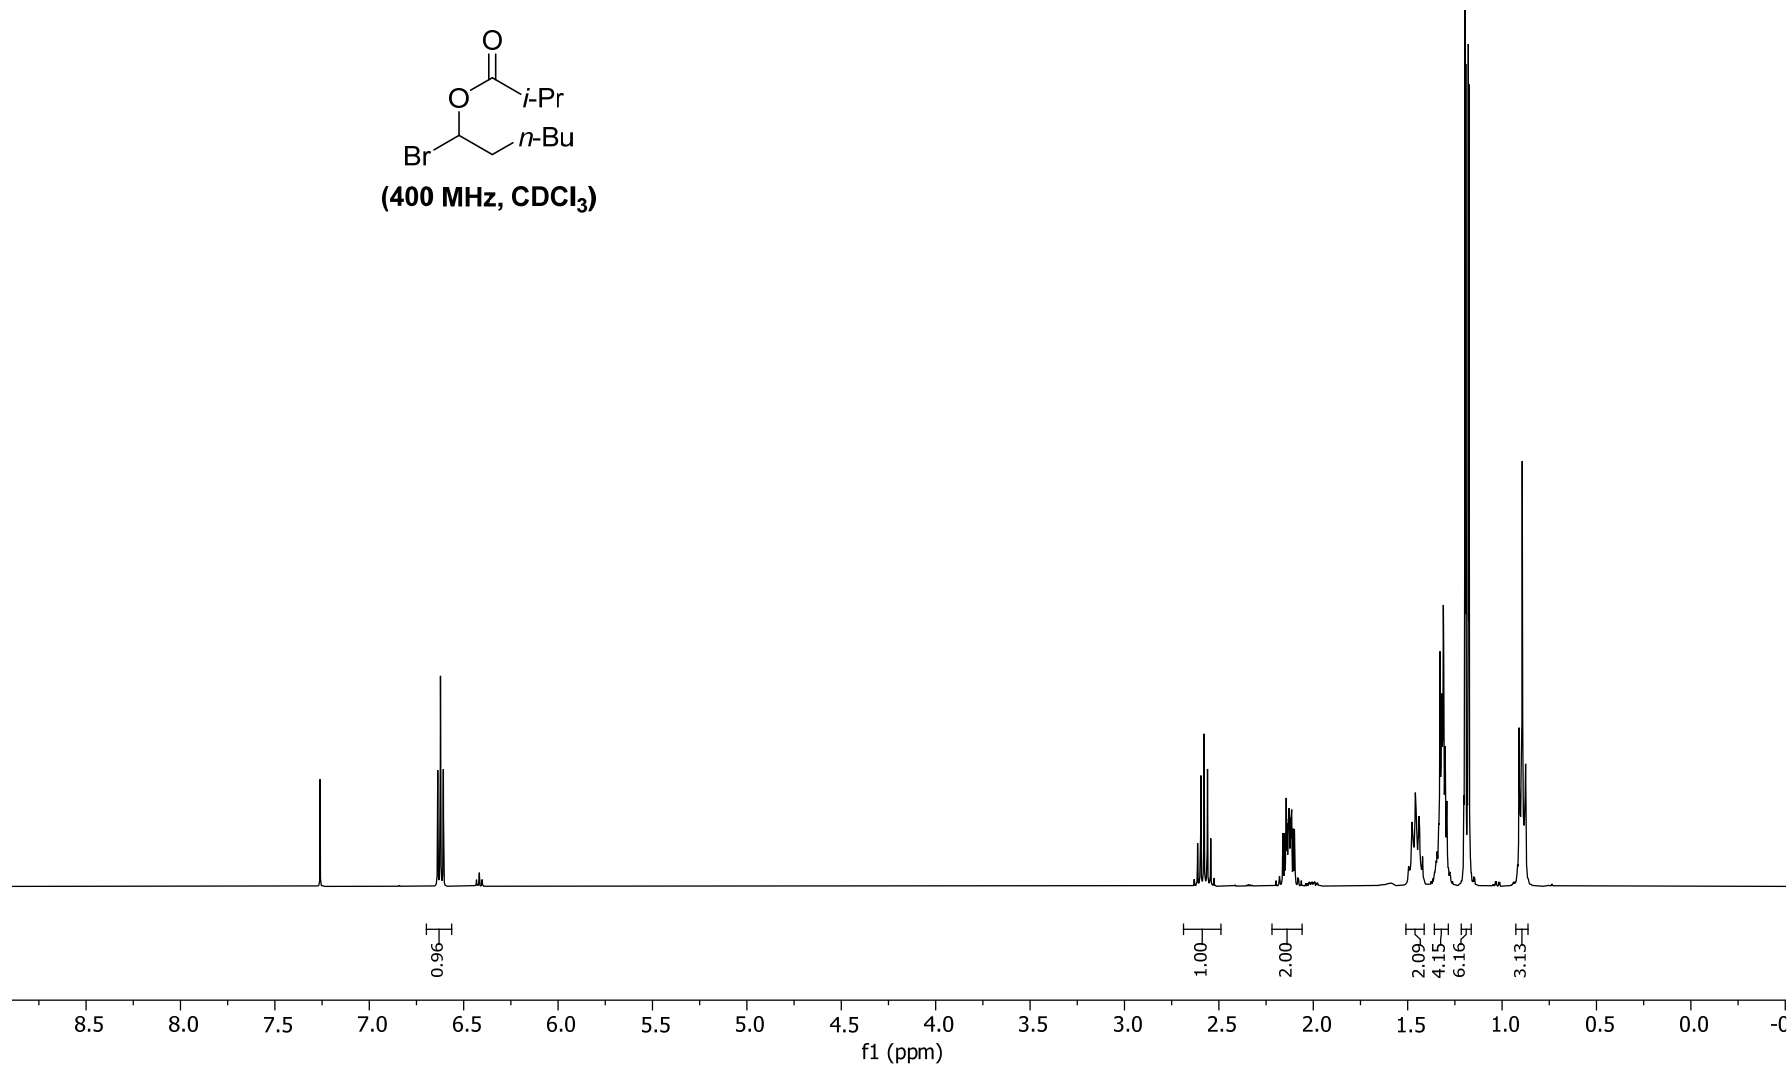

S-197

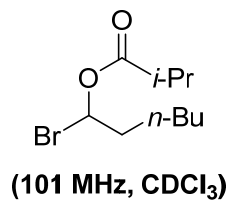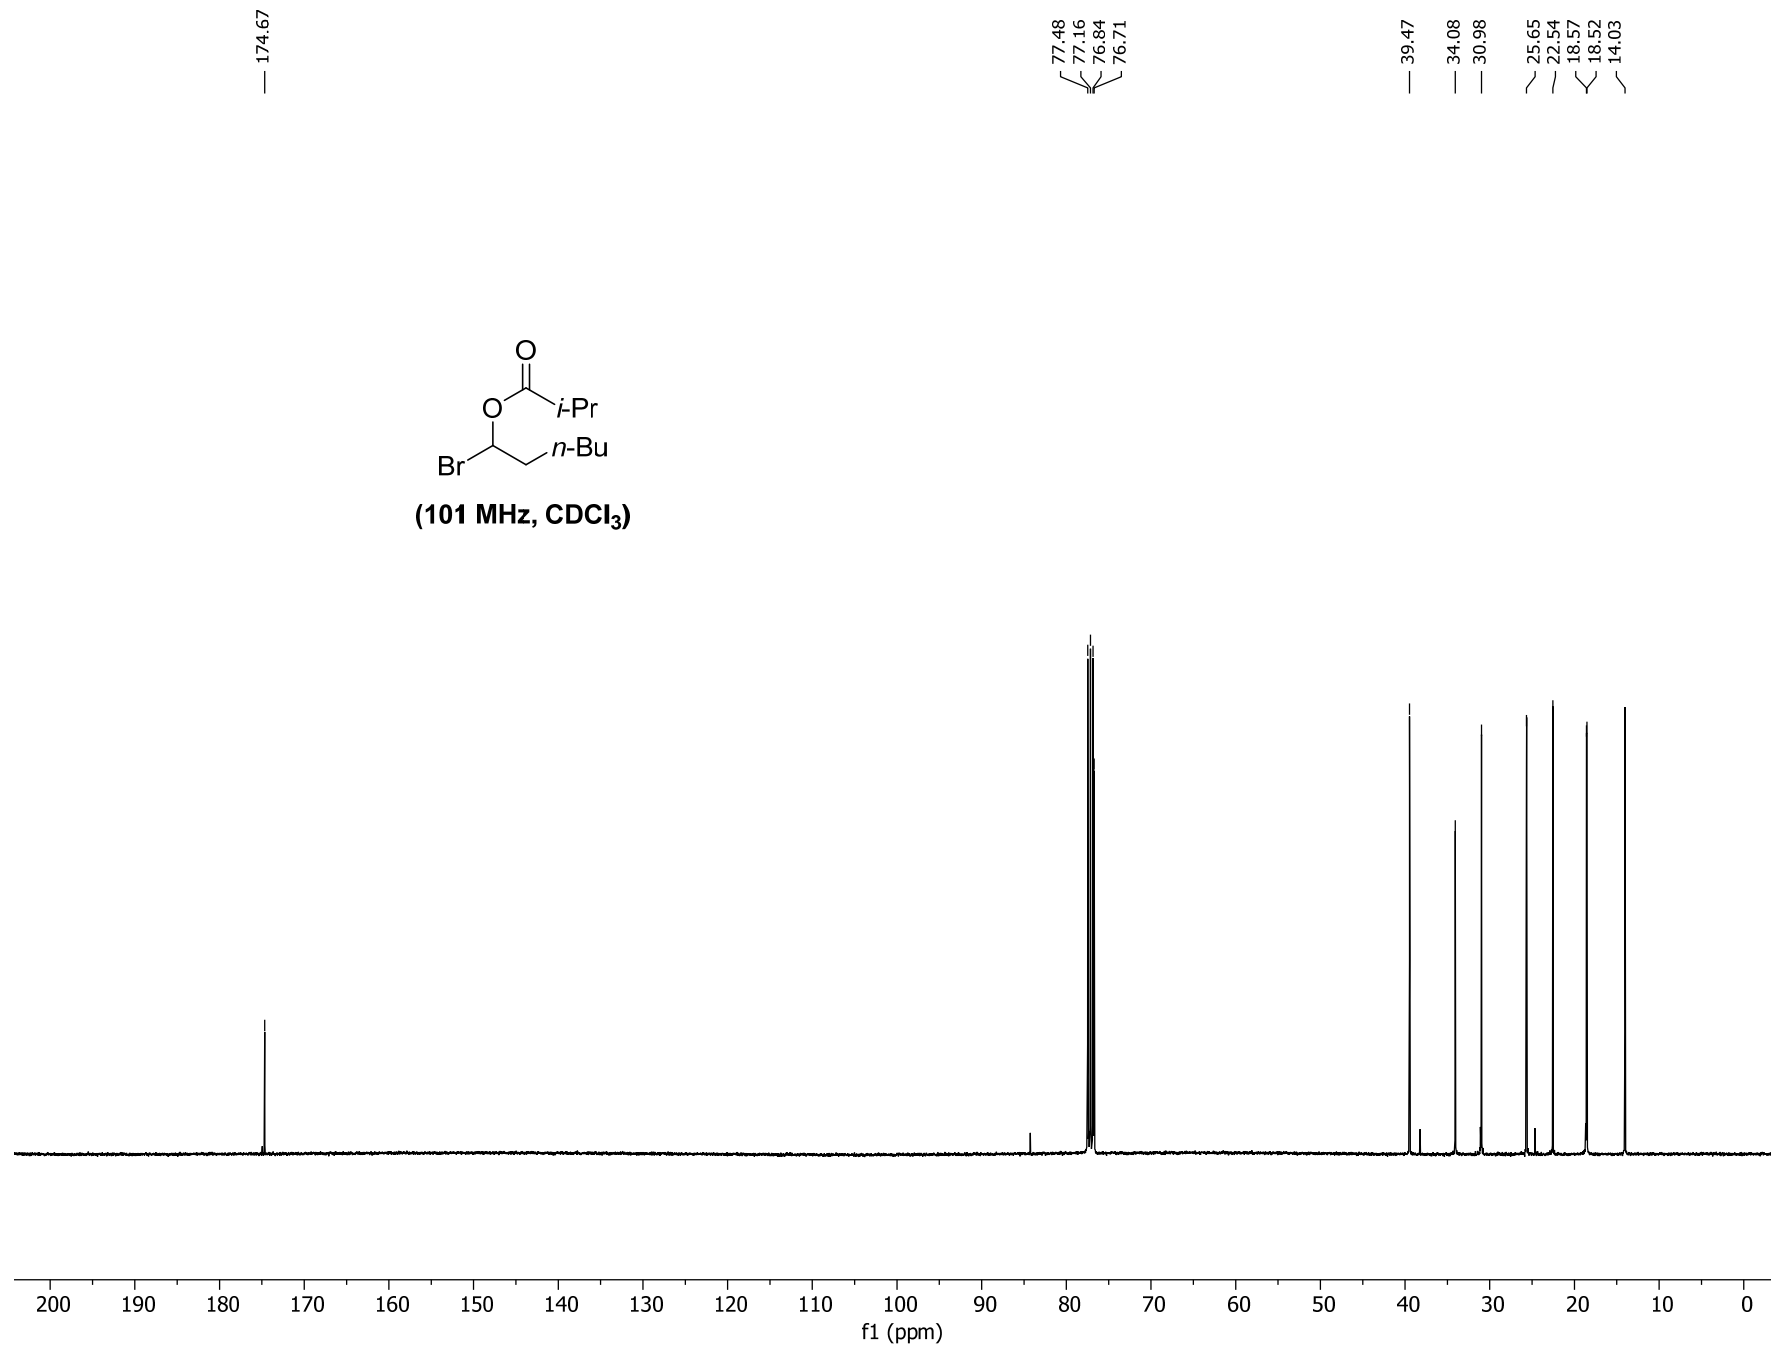

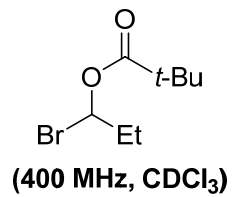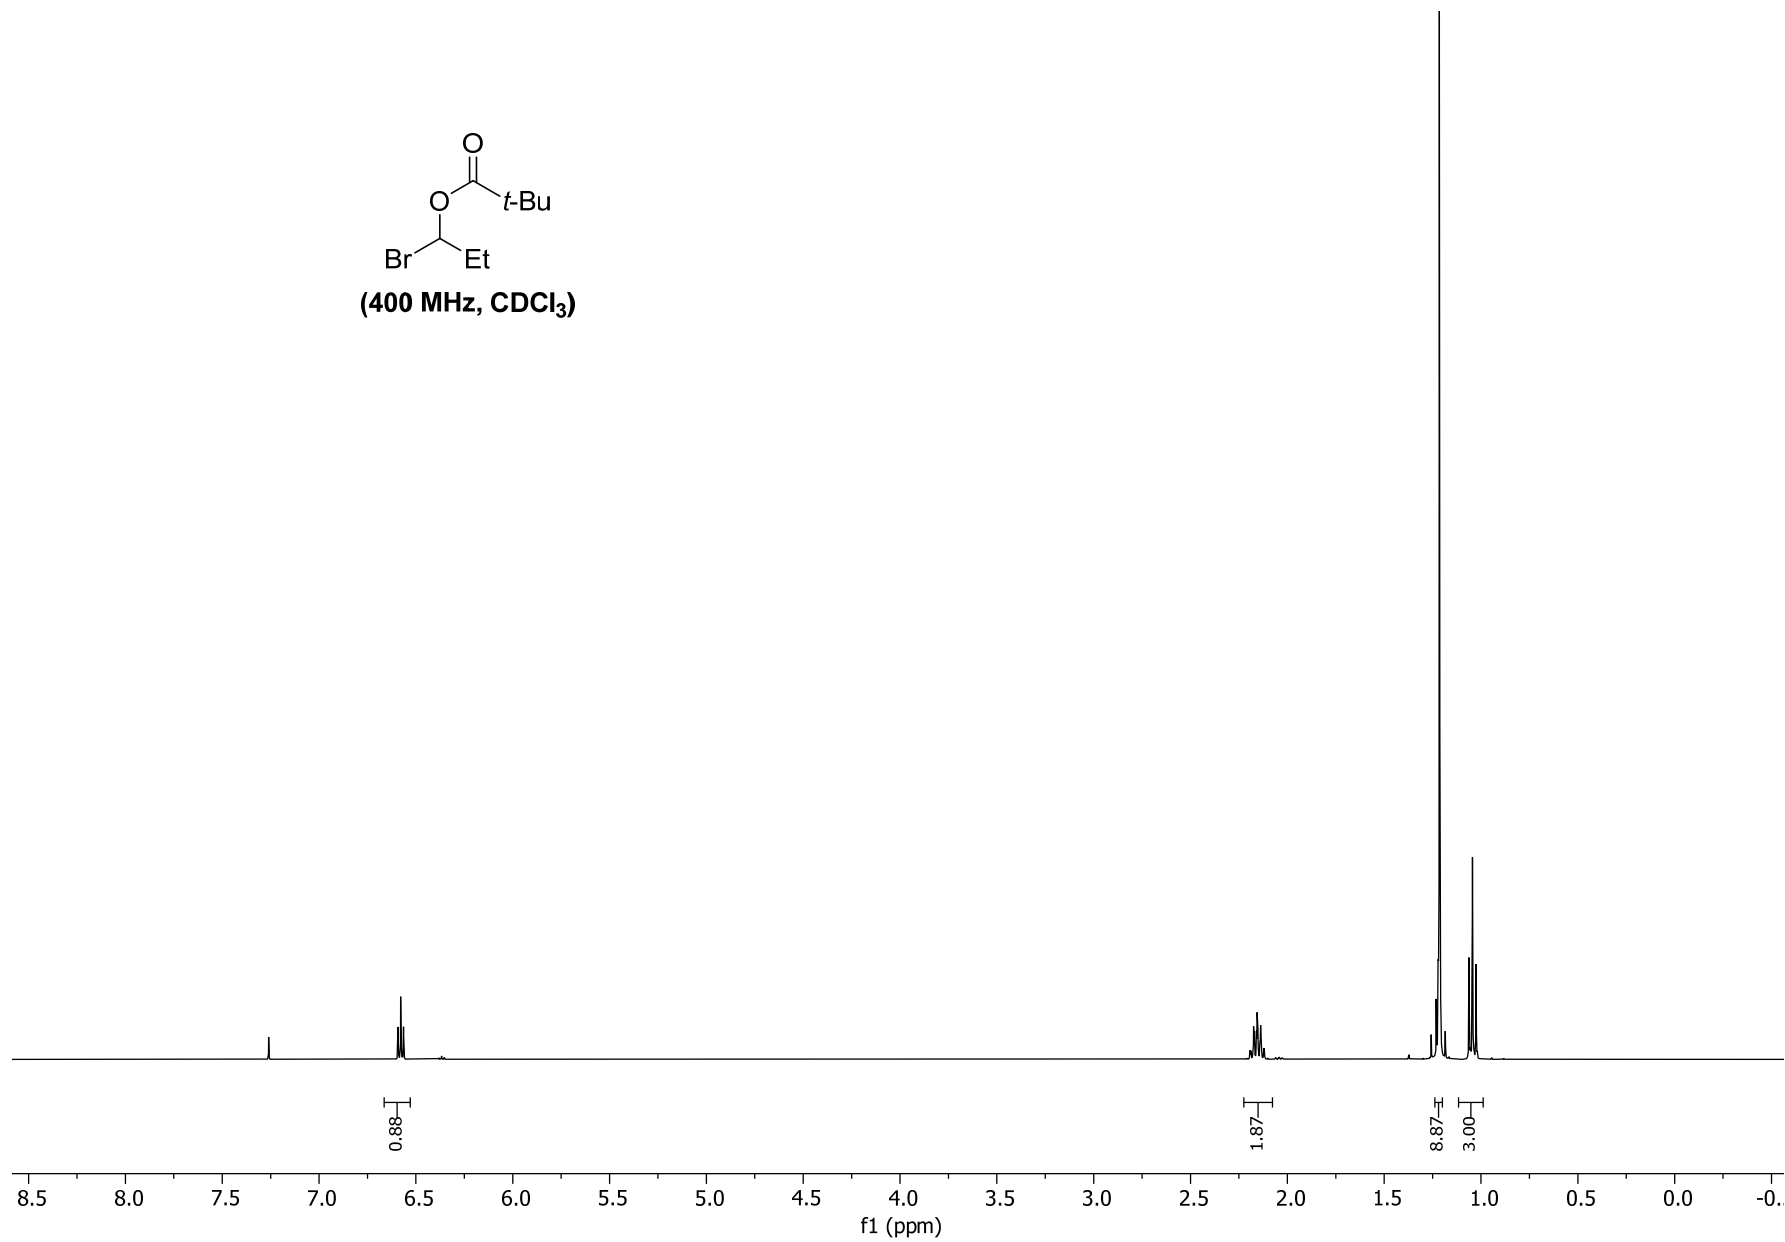

S-199

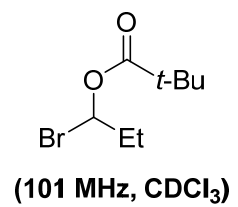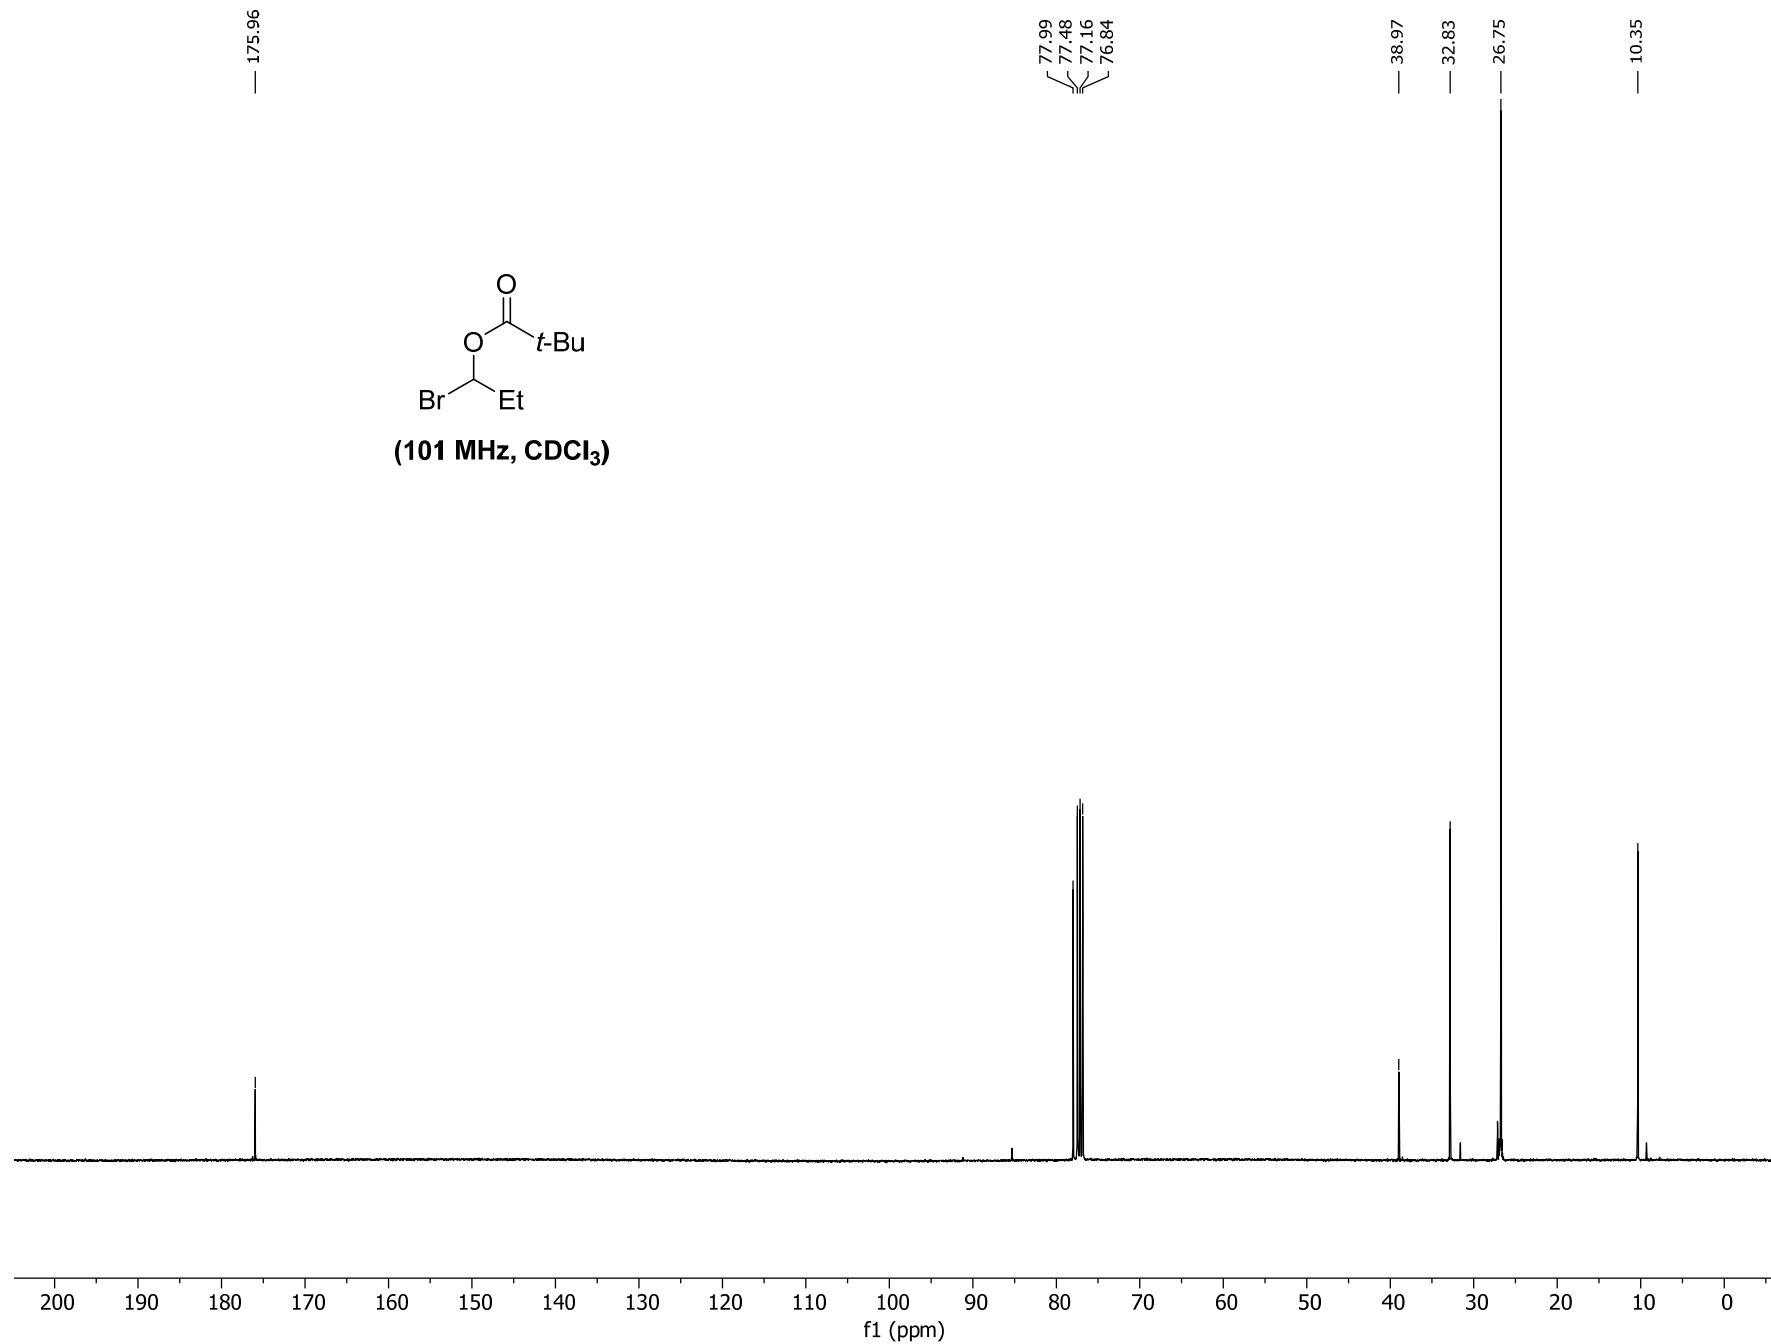



## ee Analysis

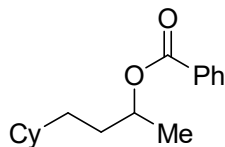

### 4-Cyclohexylbutan-2-yl benzoate (Fig. 3, entry 1)

HPLC Analysis: CHIRALPAK IC column (0.5% *i*-PrOH in hexane, 0.5 mL/min).

Compound 1: 92% ee from (*S,S*)-L\*

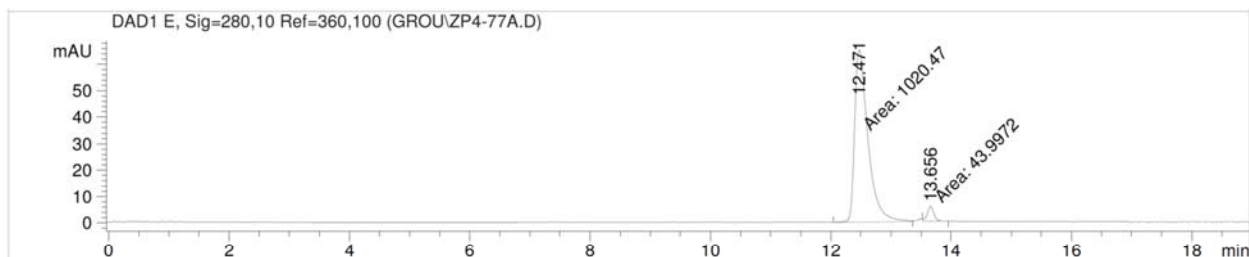

| Peak # | RetTime [min] | Type | Width [min] | Area [mAU*s] | Height [mAU] | Area %  |
|--------|---------------|------|-------------|--------------|--------------|---------|
| 1      | 12.471        | MM   | 0.2600      | 1020.46674   | 65.42083     | 95.8667 |
| 2      | 13.656        | MM   | 0.1287      | 43.99716     | 5.69912      | 4.1333  |

Compound 1: 93% ee from (*R,R*)-L\*

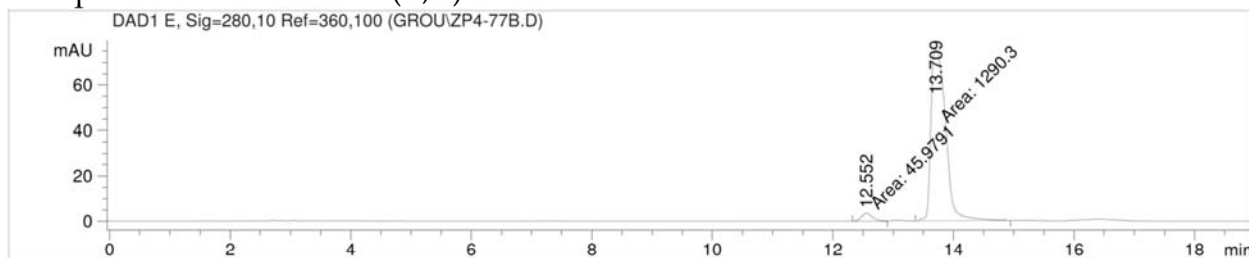

| Peak # | RetTime [min] | Type | Width [min] | Area [mAU*s] | Height [mAU] | Area %  |
|--------|---------------|------|-------------|--------------|--------------|---------|
| 1      | 12.552        | MM   | 0.2083      | 45.97911     | 3.67947      | 3.4408  |
| 2      | 13.709        | MM   | 0.2834      | 1290.30188   | 75.88998     | 96.5592 |

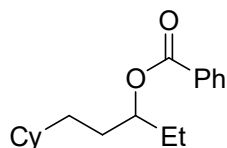

**1-Cyclohexylpentan-3-yl benzoate (Fig. 3, entry 2)**

HPLC Analysis: CHIRALPAK IC column (0.5% *i*-PrOH in hexane, 0.5 mL/min).

Compound **2**: 92% ee from (*S,S*)-L\*

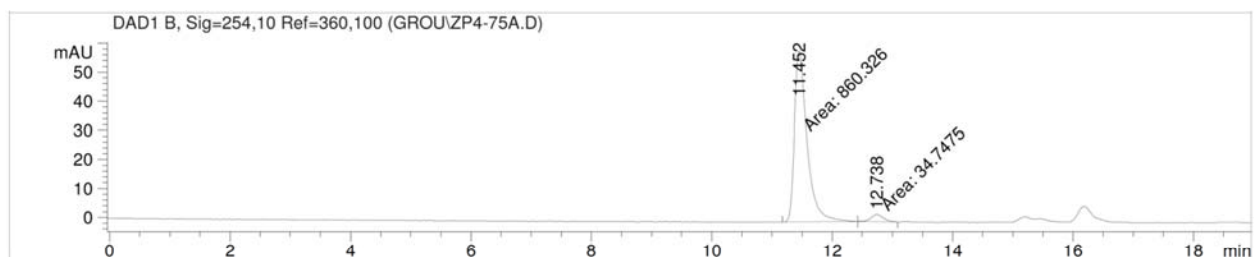

| Peak # | RetTime [min] | Type | Width [min] | Area [mAU*s] | Height [mAU] | Area %  |
|--------|---------------|------|-------------|--------------|--------------|---------|
| 1      | 11.452        | MM   | 0.2432      | 860.32556    | 58.95824     | 96.1179 |
| 2      | 12.738        | MM   | 0.2300      | 34.74754     | 2.51796      | 3.8821  |

Compound **2**: 92% ee from (*R,R*)-L\*

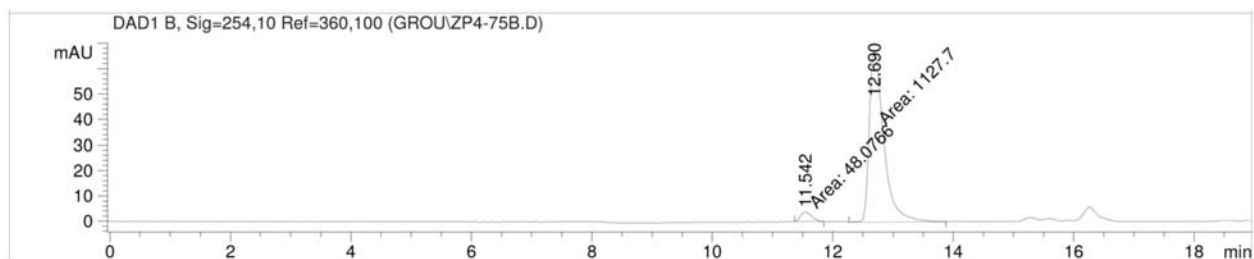

| Peak # | RetTime [min] | Type | Width [min] | Area [mAU*s] | Height [mAU] | Area %  |
|--------|---------------|------|-------------|--------------|--------------|---------|
| 1      | 11.542        | MM   | 0.2122      | 48.07655     | 3.77646      | 4.0889  |
| 2      | 12.690        | MM   | 0.2791      | 1127.70300   | 67.35000     | 95.9111 |

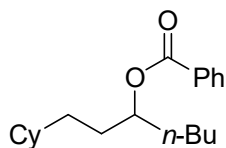

**1-Cyclohexylpentan-3-yl benzoate (Fig. 3, entry 3)**

Determination of the ee:

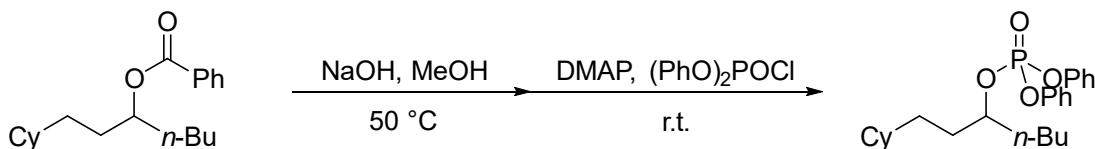

HPLC Analysis: CHIRALPAK AD column (10% *i*-PrOH in hexane, 1.0 mL/min).

94% ee from (*S,S*)-L\*

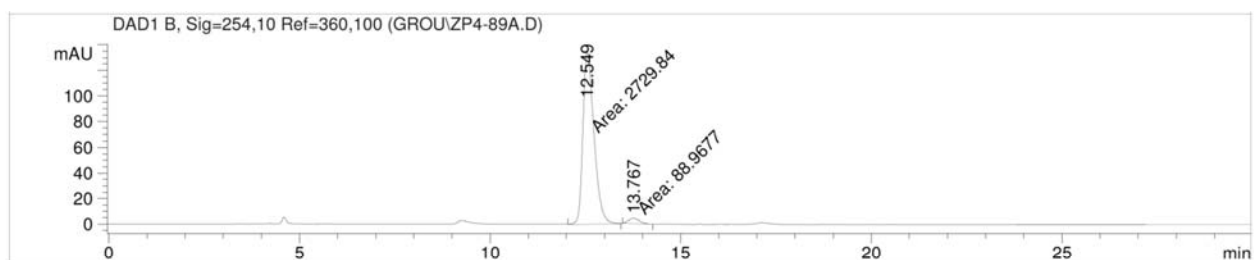

| Peak # | RetTime [min] | Type | Width [min] | Area [mAU*s] | Height [mAU] | Area %  |
|--------|---------------|------|-------------|--------------|--------------|---------|
| 1      | 12.549        | MM   | 0.3386      | 2729.84326   | 134.38257    | 96.8438 |
| 2      | 13.767        | MM   | 0.3354      | 88.96774     | 4.42148      | 3.1562  |

92% ee from (*R,R*)-L\*

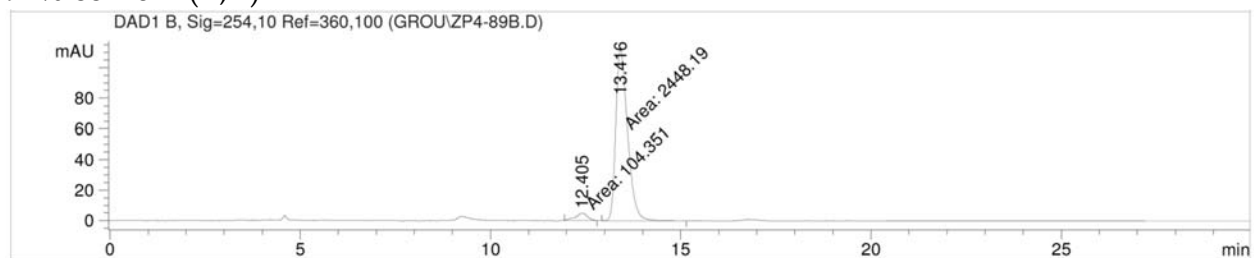

| Peak # | RetTime [min] | Type | Width [min] | Area [mAU*s] | Height [mAU] | Area %  |
|--------|---------------|------|-------------|--------------|--------------|---------|
| 1      | 12.405        | MM   | 0.3570      | 104.35123    | 4.87220      | 4.0881  |
| 2      | 13.416        | MM   | 0.3641      | 2448.18970   | 112.07947    | 95.9119 |

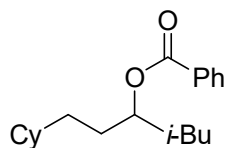

**1-Cyclohexyl-5-methylhexan-3-yl benzoate (Fig. 3, entry 4)**

Determination of the ee:

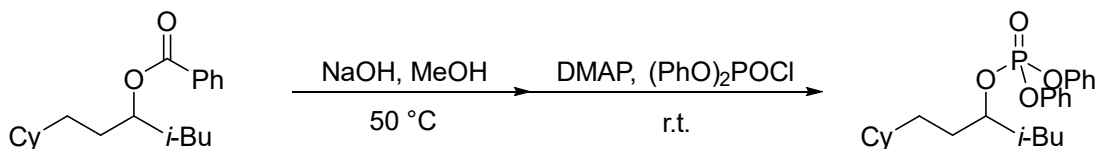

HPLC Analysis: CHIRALPAK AD column (10% *i*-PrOH in hexane, 1.0 mL/min).

95% ee from (*S,S*)-L\*

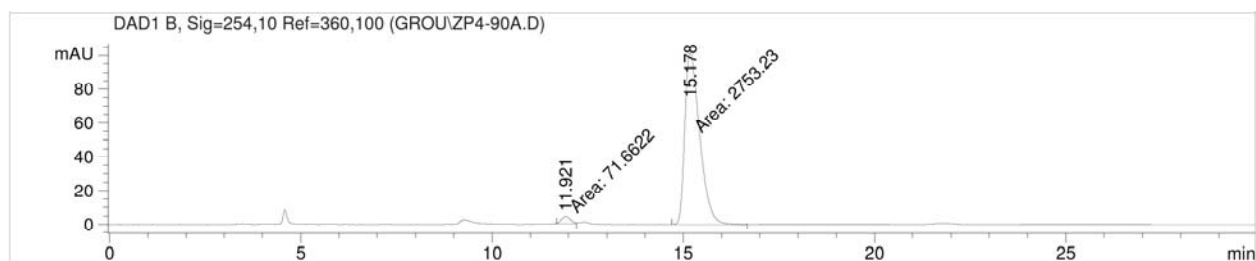

| Peak # | RetTime [min] | Type | Width [min] | Area [mAU*s] | Height [mAU] | Area %  |
|--------|---------------|------|-------------|--------------|--------------|---------|
| 1      | 11.921        | MM   | 0.2694      | 71.66221     | 4.43345      | 2.5368  |
| 2      | 15.178        | MM   | 0.4493      | 2753.23022   | 102.12244    | 97.4632 |

95% ee from (*R,R*)-L\*

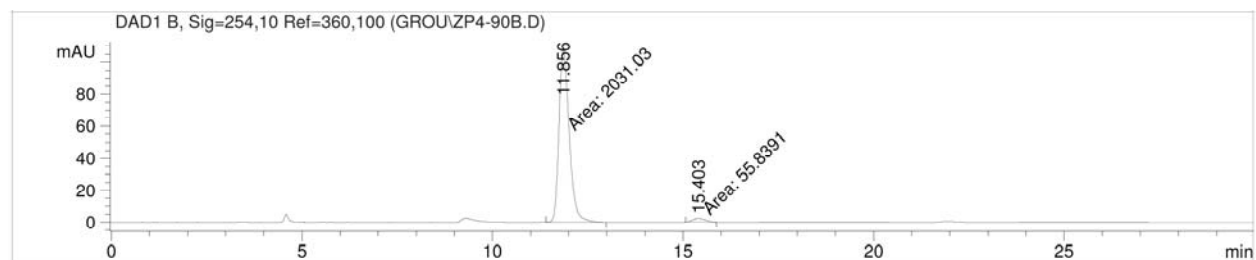

| Peak # | RetTime [min] | Type | Width [min] | Area [mAU*s] | Height [mAU] | Area %  |
|--------|---------------|------|-------------|--------------|--------------|---------|
| 1      | 11.856        | MM   | 0.3147      | 2031.03442   | 107.55618    | 97.3243 |
| 2      | 15.403        | MM   | 0.3731      | 55.83907     | 2.49425      | 2.6757  |

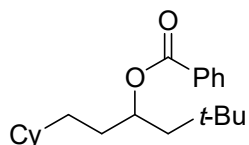

**1-Cyclohexyl-5,5-dimethylhexan-3-yl benzoate (Fig. 3, entry 5)**

Determination of the ee:

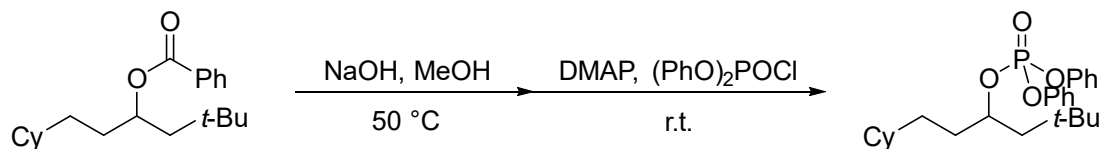

HPLC Analysis: CHIRALPAK AD column (10% *i*-PrOH in hexane, 1.0 mL/min).

94% ee from (*S,S*)-L\*

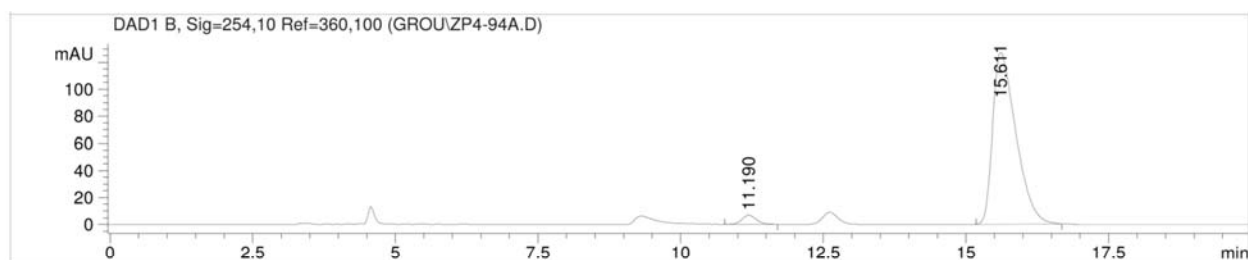

| Peak # | RetTime [min] | Type | Width [min] | Area [mAU*s] | Height [mAU] | Area %  |
|--------|---------------|------|-------------|--------------|--------------|---------|
| 1      | 11.190        | PP   | 0.2543      | 117.94586    | 6.80107      | 3.1592  |
| 2      | 15.611        | BB   | 0.4117      | 3615.41064   | 127.15755    | 96.8408 |

94% ee from (*R,R*)-L\*

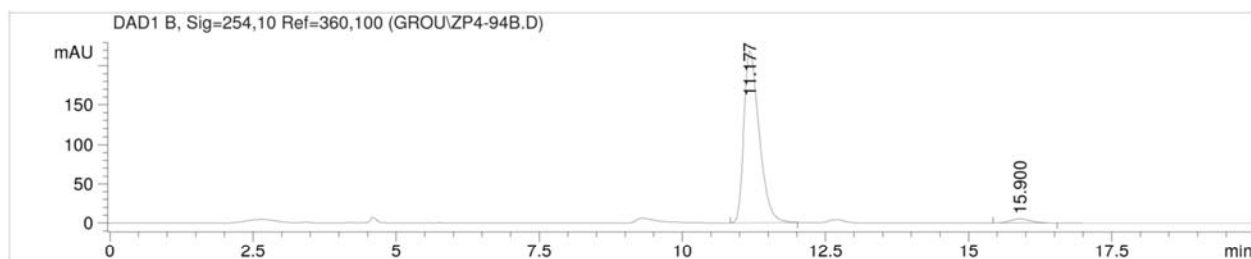

| Peak # | RetTime [min] | Type | Width [min] | Area [mAU*s] | Height [mAU] | Area %  |
|--------|---------------|------|-------------|--------------|--------------|---------|
| 1      | 11.177        | BB   | 0.2874      | 4078.64014   | 218.88083    | 97.0238 |
| 2      | 15.900        | BB   | 0.3112      | 125.11219    | 5.11736      | 2.9762  |

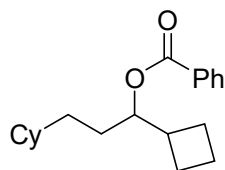

**1-Cyclobutyl-3-cyclohexylpropyl benzoate (Fig. 3, entry 6)**

Determination of the ee:

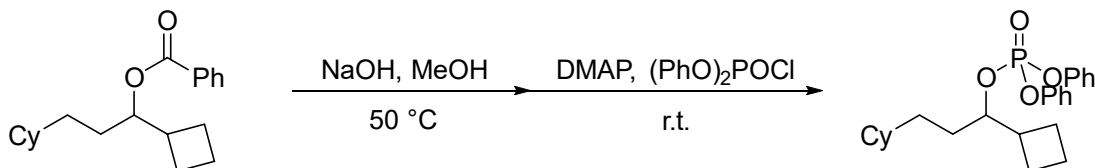

HPLC Analysis: CHIRALPAK IC column (10% *i*-PrOH in hexane, 1.0 mL/min).

98% ee from (*S,S*)-L\*

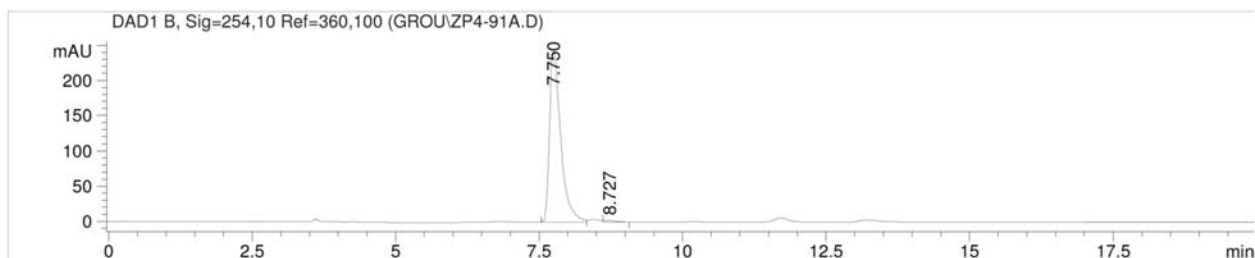

| Peak # | RetTime [min] | Type | Width [min] | Area [mAU*s] | Height [mAU] | Area %  |
|--------|---------------|------|-------------|--------------|--------------|---------|
| 1      | 7.750         | BV   | 0.2047      | 3332.25830   | 244.98424    | 98.9954 |
| 2      | 8.727         | VP   | 0.2050      | 33.81463     | 2.51254      | 1.0046  |

98% ee from (*R,R*)-L\*

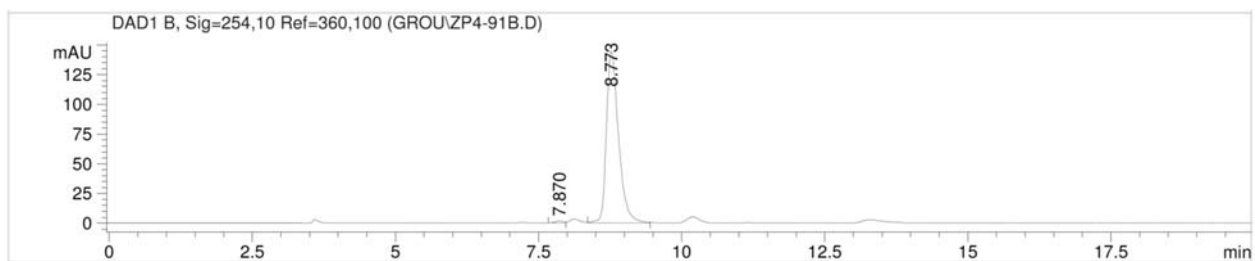

| Peak # | RetTime [min] | Type | Width [min] | Area [mAU*s] | Height [mAU] | Area %  |
|--------|---------------|------|-------------|--------------|--------------|---------|
| 1      | 7.870         | BV   | 0.1398      | 16.36773     | 1.59407      | 0.7649  |
| 2      | 8.773         | VB   | 0.2213      | 2123.44824   | 144.64511    | 99.2351 |

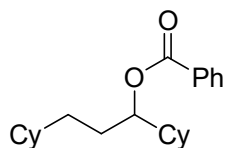

**1,3-Dicyclohexylpropyl benzoate (Fig. 3, entry 7)**

Determination of the ee:

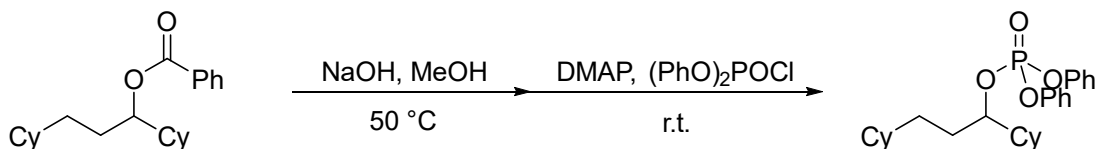

HPLC Analysis: CHIRALPAK AS column (5% *i*-PrOH in hexane, 1.0 mL/min).

96% ee from (*S,S*)-L\*

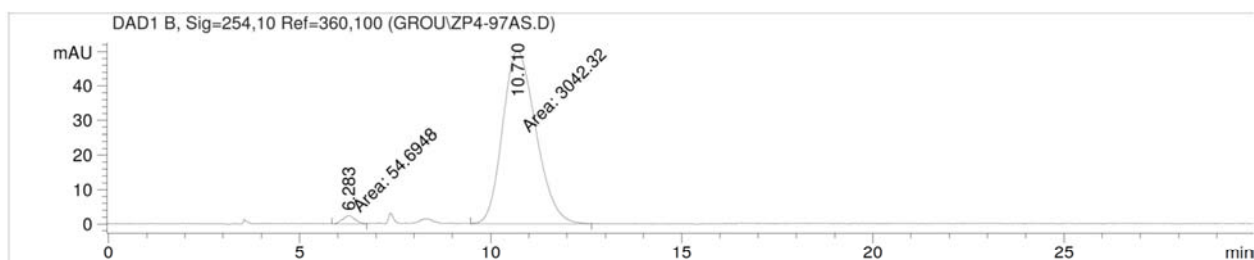

| Peak # | RetTime [min] | Type | Width [min] | Area [mAU*s] | Height [mAU] | Area %  |
|--------|---------------|------|-------------|--------------|--------------|---------|
| 1      | 6.283         | MM   | 0.3732      | 54.69480     | 2.44234      | 1.7660  |
| 2      | 10.710        | MM   | 1.0137      | 3042.32031   | 50.02224     | 98.2340 |

95% ee from (*R,R*)-L\*

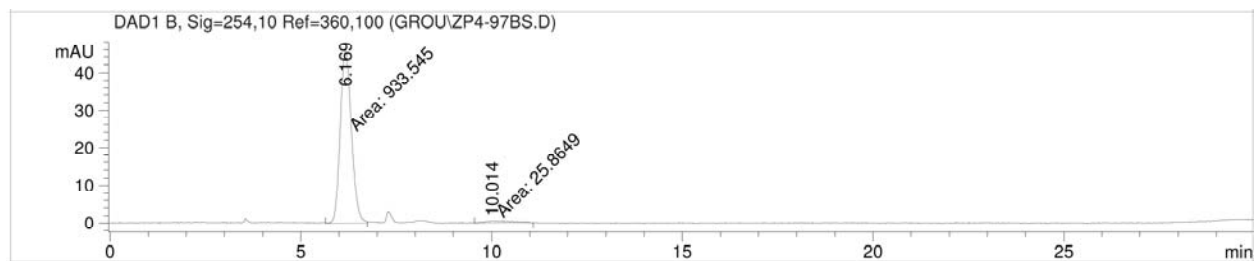

| Peak # | RetTime [min] | Type | Width [min] | Area [mAU*s] | Height [mAU] | Area %  |
|--------|---------------|------|-------------|--------------|--------------|---------|
| 1      | 6.169         | MM   | 0.3395      | 933.54541    | 45.82965     | 97.3041 |
| 2      | 10.014        | MM   | 0.8480      | 25.86488     | 5.08327e-1   | 2.6959  |



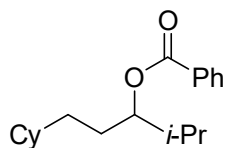

**1-Cyclohexyl-4-methylpentan-3-yl benzoate (Fig. 3, entry 8)**

HPLC Analysis: CHIRALPAK IC column (0.5% *i*-PrOH in hexane, 0.5 mL/min).

Compound 8: 94% ee from (*S,S*)-L\*

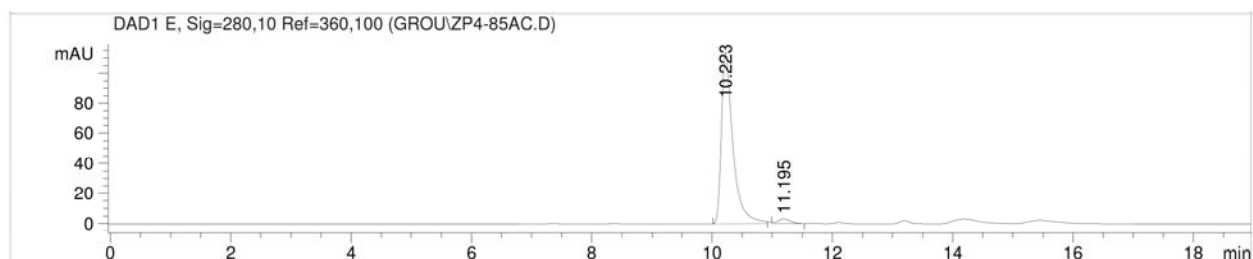

| Peak # | RetTime [min] | Type | Width [min] | Area [mAU*s] | Height [mAU] | Area %  |
|--------|---------------|------|-------------|--------------|--------------|---------|
| 1      | 10.223        | BB   | 0.2005      | 1527.53381   | 113.86597    | 97.2284 |
| 2      | 11.195        | BP   | 0.2084      | 43.54475     | 3.12908      | 2.7716  |

Compound 8: 95% ee from (*R,R*)-L\*

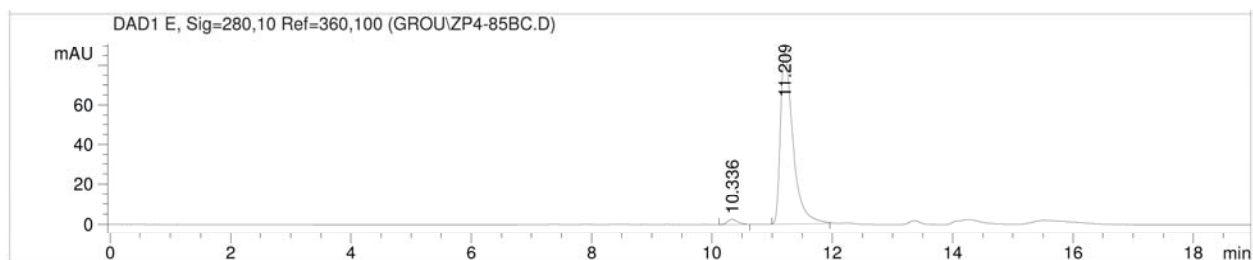

| Peak # | RetTime [min] | Type | Width [min] | Area [mAU*s] | Height [mAU] | Area %  |
|--------|---------------|------|-------------|--------------|--------------|---------|
| 1      | 10.336        | BB   | 0.1764      | 29.31732     | 2.50826      | 2.3050  |
| 2      | 11.209        | BB   | 0.2175      | 1242.57068   | 86.55486     | 97.6950 |



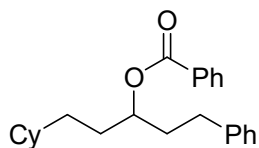

**1-Cyclohexyl-5-phenylpentan-3-yl benzoate (Fig. 3, entry 9)**

HPLC Analysis: CHIRALCEL OD column (1% *i*-PrOH in hexane, 1.0 mL/min).

Compound **9**: 92% ee from (*S,S*)-L\*

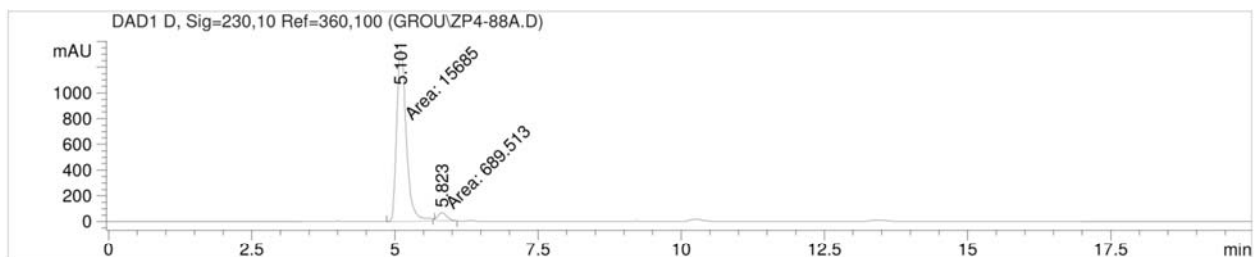

| Peak # | RetTime [min] | Type | Width [min] | Area [mAU*s] | Height [mAU] | Area %  |
|--------|---------------|------|-------------|--------------|--------------|---------|
| 1      | 5.101         | MM   | 0.1956      | 1.56850e4    | 1336.79956   | 95.7891 |
| 2      | 5.823         | MM   | 0.1818      | 689.51324    | 63.22087     | 4.2109  |

Compound **9**: 92% ee from (*R,R*)-L\*

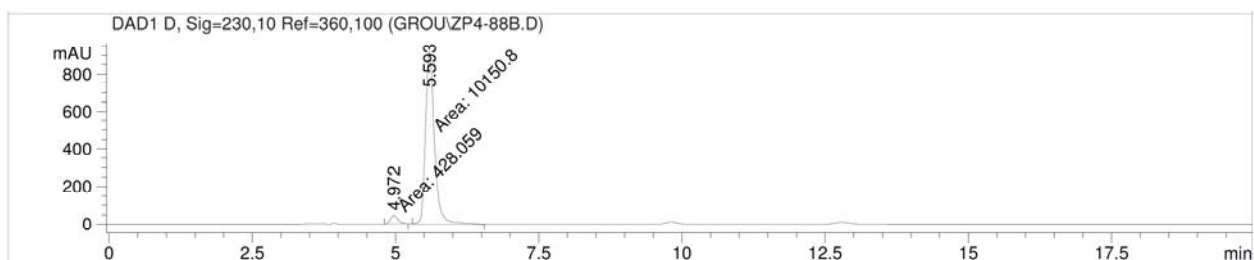

| Peak # | RetTime [min] | Type | Width [min] | Area [mAU*s] | Height [mAU] | Area %  |
|--------|---------------|------|-------------|--------------|--------------|---------|
| 1      | 4.972         | MM   | 0.1573      | 428.05896    | 45.36115     | 4.0464  |
| 2      | 5.593         | MM   | 0.1837      | 1.01508e4    | 920.78693    | 95.9536 |

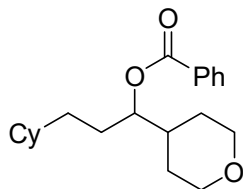

**3-Cyclohexyl-1-(tetrahydro-2H-pyran-4-yl)propyl benzoate (Fig. 3, entry 10)**

HPLC Analysis: CHIRALPAK IC column (3% *i*-PrOH in hexane, 1.0 mL/min).

Compound 10: 97% ee from (*S,S*)-L\*

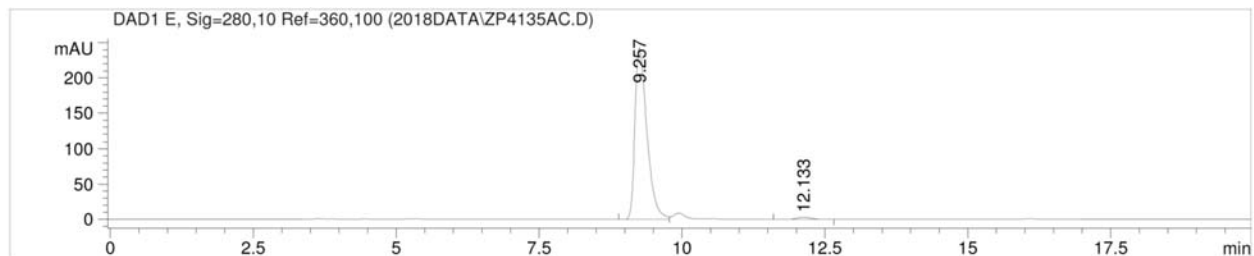

| Peak # | RetTime [min] | Type | Width [min] | Area [mAU*s] | Height [mAU] | Area %  |
|--------|---------------|------|-------------|--------------|--------------|---------|
| 1      | 9.257         | VV   | 0.2202      | 3556.41650   | 243.73369    | 98.3426 |
| 2      | 12.133        | VV   | 0.2663      | 59.93850     | 3.23356      | 1.6574  |

Compound 10: 96% ee from (*R,R*)-L\*

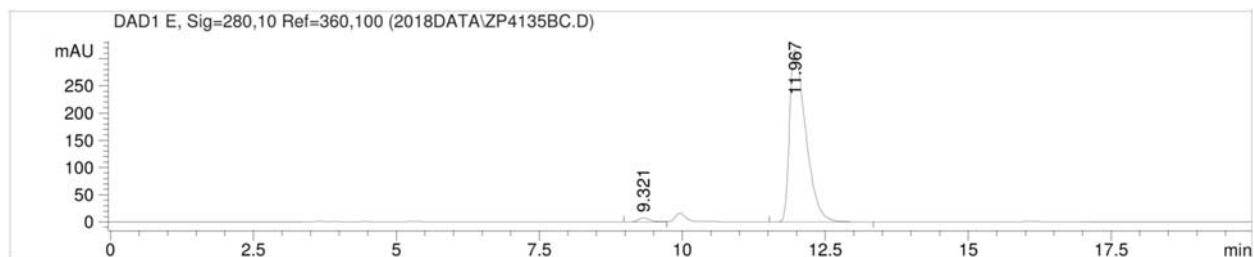

| Peak # | RetTime [min] | Type | Width [min] | Area [mAU*s] | Height [mAU] | Area %  |
|--------|---------------|------|-------------|--------------|--------------|---------|
| 1      | 9.321         | VV   | 0.2218      | 121.65885    | 8.16647      | 1.9065  |
| 2      | 11.967        | VV   | 0.2984      | 6259.64893   | 316.97699    | 98.0935 |

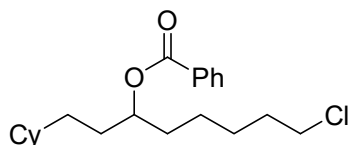

**8-Chloro-1-cyclohexyloctan-3-yl benzoate (Fig. 3, entry 11)**

HPLC Analysis: CHIRALPAK AD column (1% *i*-PrOH in hexane, 1.0 mL/min).

Compound **11**: 92% ee from (*S,S*)-L\*

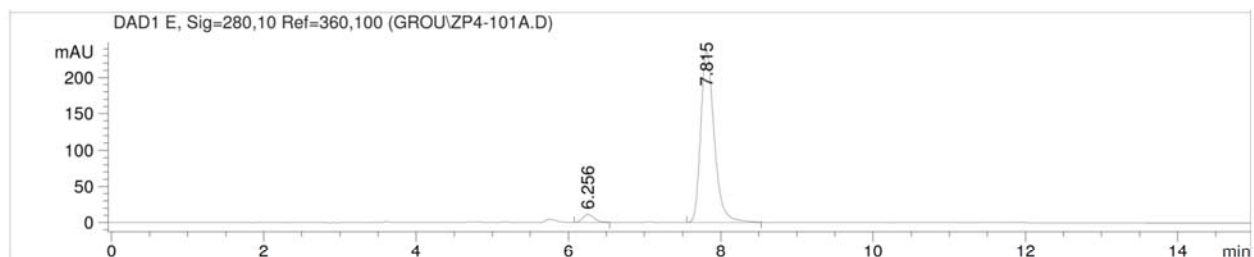

| Peak # | RetTime [min] | Type | Width [min] | Area [mAU*s] | Height [mAU] | Area %  |
|--------|---------------|------|-------------|--------------|--------------|---------|
| 1      | 6.256         | BB   | 0.1589      | 117.25640    | 11.31899     | 3.8425  |
| 2      | 7.815         | BB   | 0.1903      | 2934.32153   | 237.18481    | 96.1575 |

Compound **11**: 92% ee from (*R,R*)-L\*

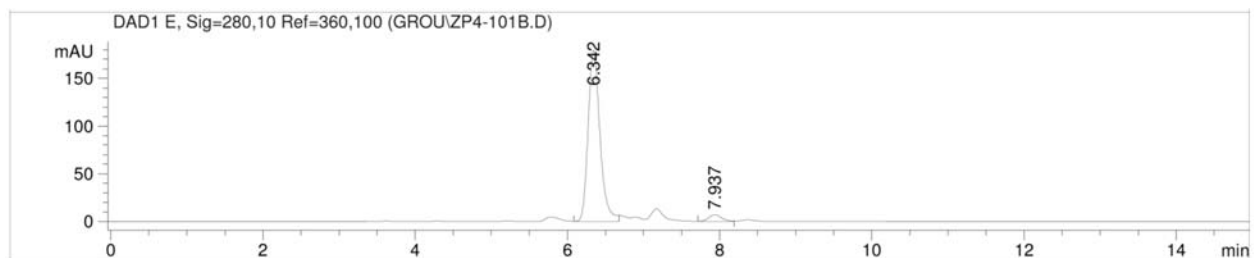

| Peak # | RetTime [min] | Type | Width [min] | Area [mAU*s] | Height [mAU] | Area %  |
|--------|---------------|------|-------------|--------------|--------------|---------|
| 1      | 6.342         | VB   | 0.1652      | 1960.16455   | 179.76314    | 95.8117 |
| 2      | 7.937         | BV   | 0.1881      | 85.68716     | 7.13379      | 4.1883  |

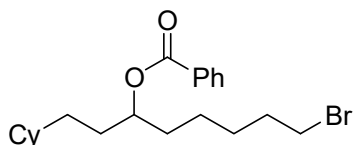

**8-Bromo-1-cyclohexyloctan-3-yl benzoate (Fig. 3, entry 12)**

HPLC Analysis: CHIRALPAK IC column (0.5% *i*-PrOH in hexane, 0.5 mL/min).

Compound **12**: 94% ee from (*S,S*)-L\*

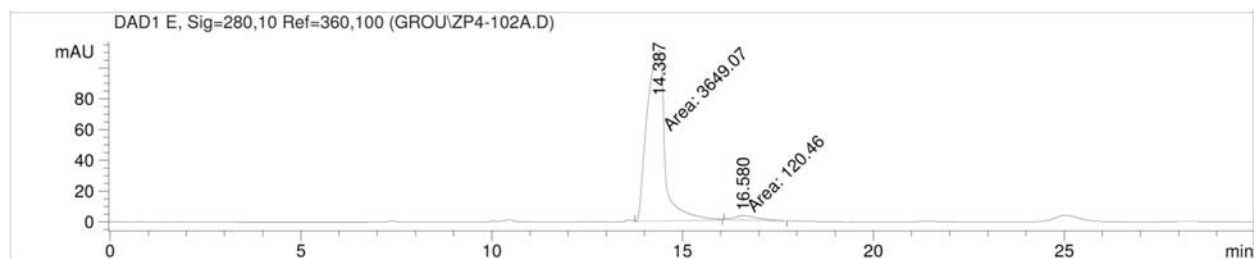

| Peak # | RetTime [min] | Type | Width [min] | Area [mAU*s] | Height [mAU] | Area %  |
|--------|---------------|------|-------------|--------------|--------------|---------|
| 1      | 14.387        | MM   | 0.5484      | 3649.07031   | 110.89110    | 96.8044 |
| 2      | 16.580        | MM   | 0.6954      | 120.46003    | 2.88698      | 3.1956  |

Compound **12**: 92% ee from (*R,R*)-L\*

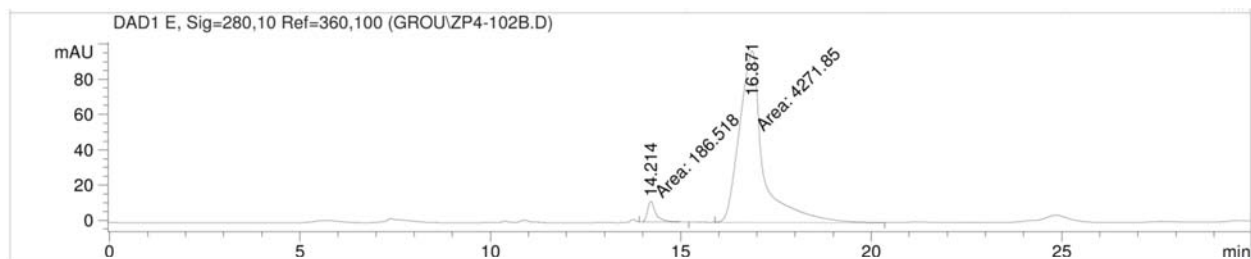

| Peak # | RetTime [min] | Type | Width [min] | Area [mAU*s] | Height [mAU] | Area %  |
|--------|---------------|------|-------------|--------------|--------------|---------|
| 1      | 14.214        | MM   | 0.2624      | 186.51799    | 11.84726     | 4.1835  |
| 2      | 16.871        | MM   | 0.7293      | 4271.85449   | 97.62020     | 95.8165 |

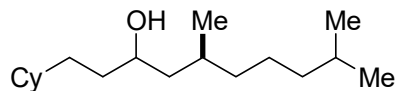

(5S)-1-Cyclohexyl-5,9-dimethyldecane-3-ol (Fig. 3, entries 13 and 14)

Determination of the ee:

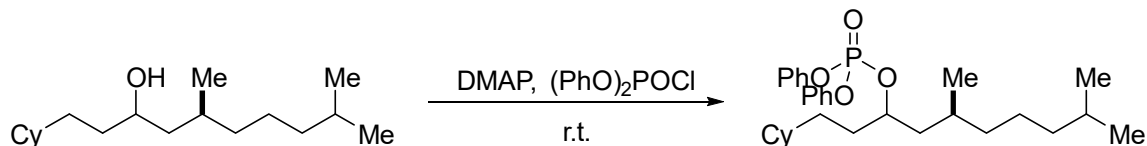

HPLC Analysis: AD column (10% *i*-PrOH in hexane, 1.0 mL/min).

4:96 d.r. ee from (*S,S*)-L\*

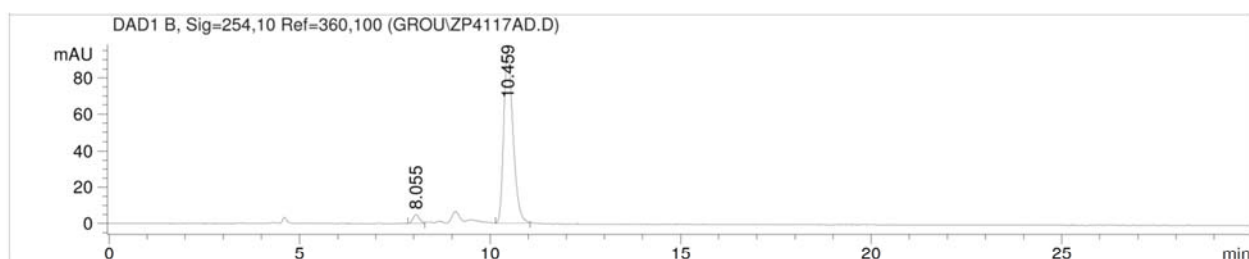

| Peak # | RetTime [min] | Type | Width [min] | Area [mAU*s] | Height [mAU] | Area %  |
|--------|---------------|------|-------------|--------------|--------------|---------|
| 1      | 8.055         | PV   | 0.1883      | 59.13276     | 4.91675      | 3.5444  |
| 2      | 10.459        | BB   | 0.2646      | 1609.19922   | 93.58408     | 96.4556 |

96:4 d.r. from (*R,R*)-L\*

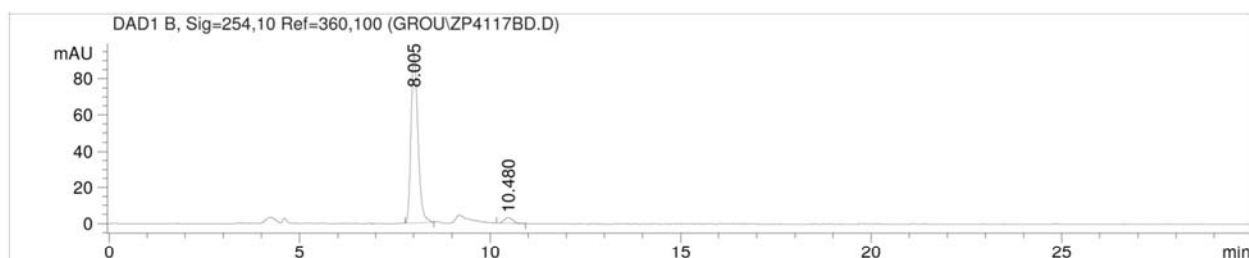

| Peak # | RetTime [min] | Type | Width [min] | Area [mAU*s] | Height [mAU] | Area %  |
|--------|---------------|------|-------------|--------------|--------------|---------|
| 1      | 8.005         | BB   | 0.1948      | 1189.57336   | 94.52553     | 95.8505 |
| 2      | 10.480        | PB   | 0.2362      | 51.49876     | 3.15898      | 4.1495  |

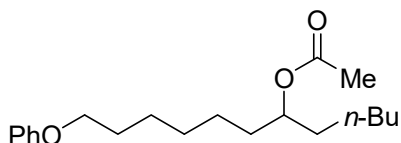

**12-Phenoxydodecan-6-yl acetate (Fig. 3, entry 15)**

HPLC Analysis: CHIRALCEL OD column (2% *i*-PrOH in hexane, 1.0 mL/min).

Compound **15**: 93% ee from (*S,S*)-L\*

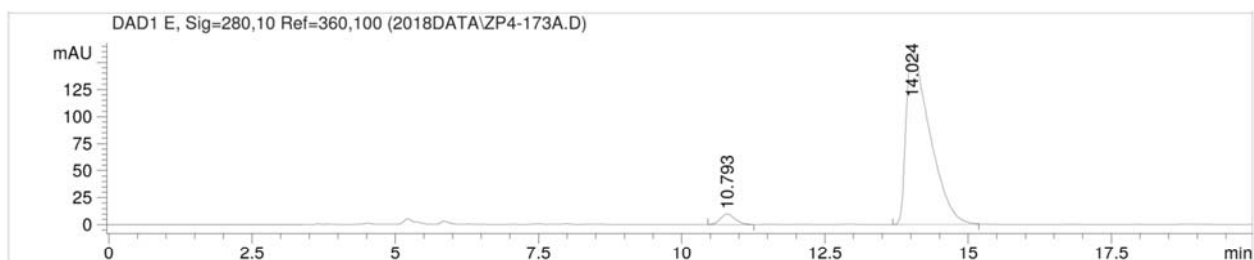

| Peak # | RetTime [min] | Type | Width [min] | Area [mAU*s] | Height [mAU] | Area %  |
|--------|---------------|------|-------------|--------------|--------------|---------|
| 1      | 10.793        | BP   | 0.2708      | 173.42961    | 9.78468      | 3.6057  |
| 2      | 14.024        | BB   | 0.4243      | 4636.43018   | 159.88266    | 96.3943 |

Compound **15**: 92% ee from (*R,R*)-L\*

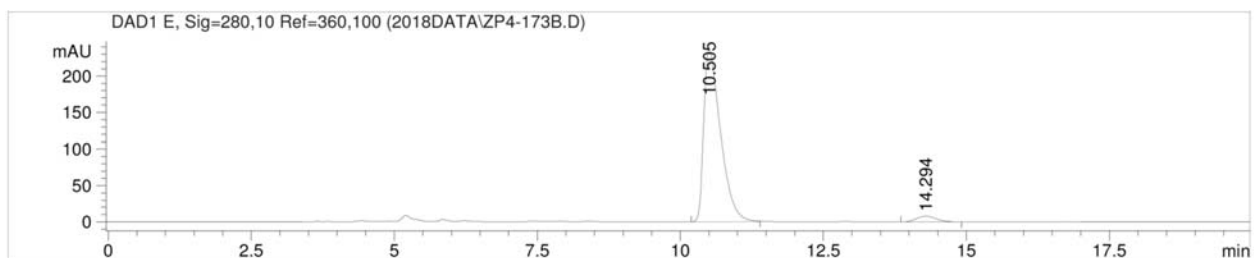

| Peak # | RetTime [min] | Type | Width [min] | Area [mAU*s] | Height [mAU] | Area %  |
|--------|---------------|------|-------------|--------------|--------------|---------|
| 1      | 10.505        | BB   | 0.3085      | 4817.05322   | 235.60921    | 96.1088 |
| 2      | 14.294        | BB   | 0.3162      | 195.02824    | 8.11999      | 3.8912  |

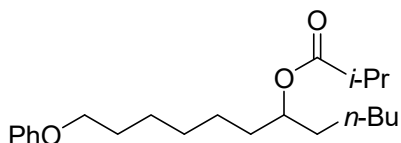

**12-Phenoxydodecan-6-yl isobutyrate (Fig. 3, entry 16)**

HPLC Analysis: CHIRALPAK AD column (0.5% *i*-PrOH in hexane, 1.0 mL/min).

Compound **16**: 94% ee from (*S,S*)-L\*

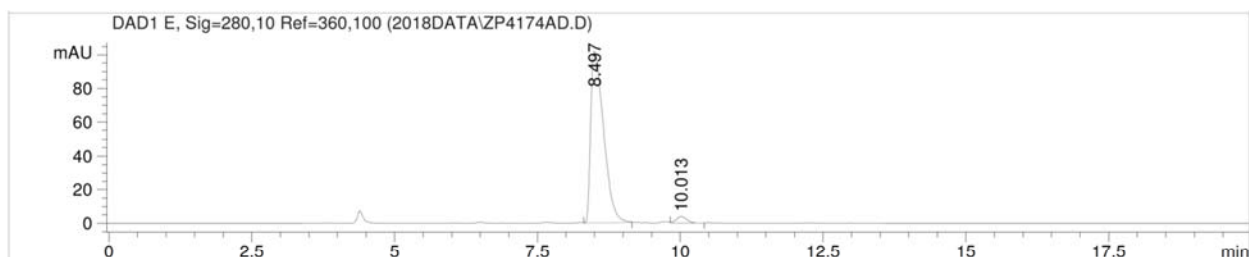

| Peak # | RetTime [min] | Type | Width [min] | Area [mAU*s] | Height [mAU] | Area %  |
|--------|---------------|------|-------------|--------------|--------------|---------|
| 1      | 8.497         | BB   | 0.2380      | 1606.96899   | 101.87103    | 97.1606 |
| 2      | 10.013        | VP   | 0.1895      | 46.96135     | 3.87224      | 2.8394  |

Compound **16**: 95% ee from (*R,R*)-L\*

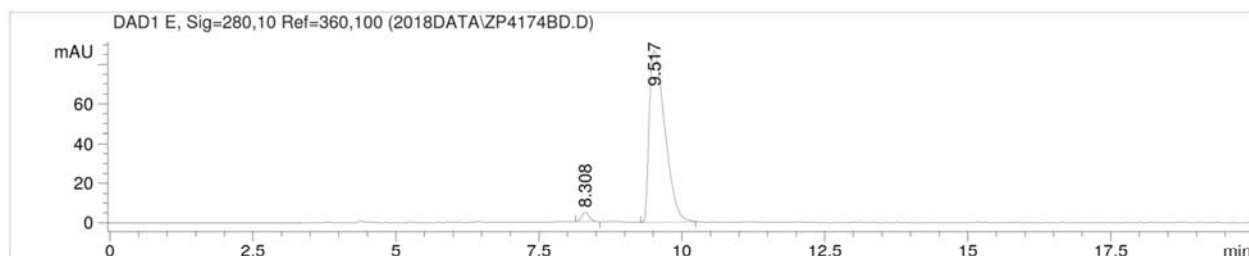

| Peak # | RetTime [min] | Type | Width [min] | Area [mAU*s] | Height [mAU] | Area %  |
|--------|---------------|------|-------------|--------------|--------------|---------|
| 1      | 8.308         | BP   | 0.1484      | 45.20425     | 4.69289      | 2.6562  |
| 2      | 9.517         | BB   | 0.2985      | 1656.60596   | 86.87539     | 97.3438 |



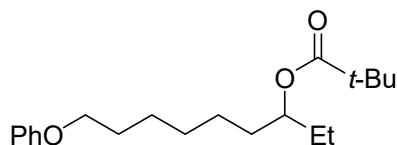

**9-Phenoxynonan-3-yl pivalate (Fig. 3, entry 17)**

HPLC Analysis: CHIRALPAK AD column (0.5% *i*-PrOH in hexane, 0.5 mL/min).

Compound **17**: 91% ee from (*S,S*)-L\*

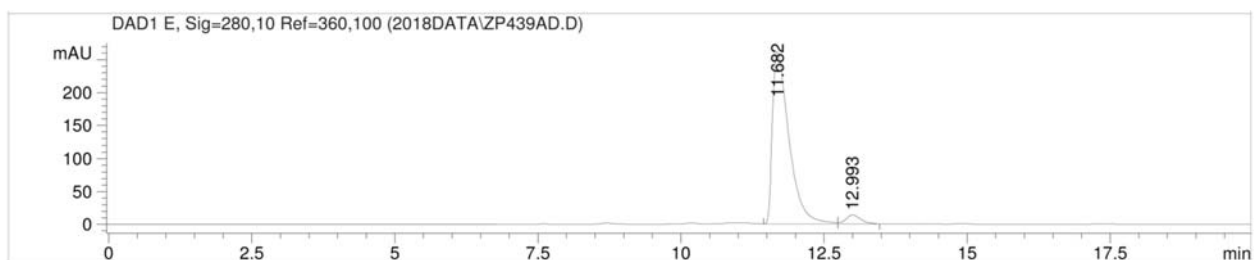

| Peak # | RetTime [min] | Type | Width [min] | Area [mAU*s] | Height [mAU] | Area %  |
|--------|---------------|------|-------------|--------------|--------------|---------|
| 1      | 11.682        | VB   | 0.3045      | 5305.00488   | 261.68567    | 95.4565 |
| 2      | 12.993        | BB   | 0.2795      | 252.50493    | 13.79788     | 4.5435  |

Compound **17**: 92% ee from (*R,R*)-L\*

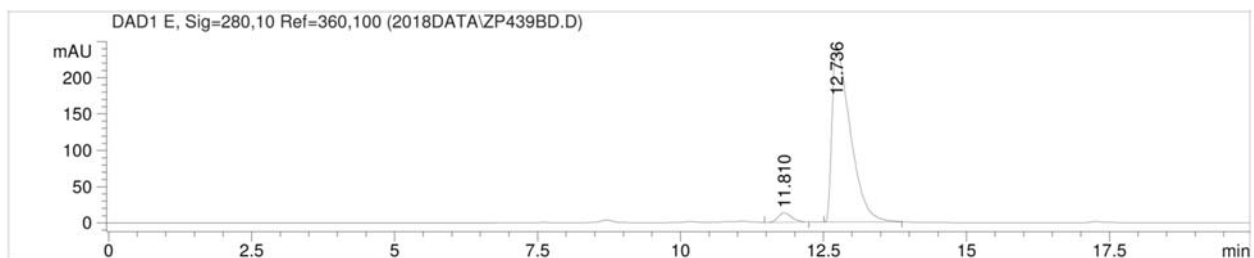

| Peak # | RetTime [min] | Type | Width [min] | Area [mAU*s] | Height [mAU] | Area %  |
|--------|---------------|------|-------------|--------------|--------------|---------|
| 1      | 11.810        | VB   | 0.2462      | 212.08485    | 13.00732     | 3.8034  |
| 2      | 12.736        | PB   | 0.3378      | 5364.16016   | 237.23378    | 96.1966 |



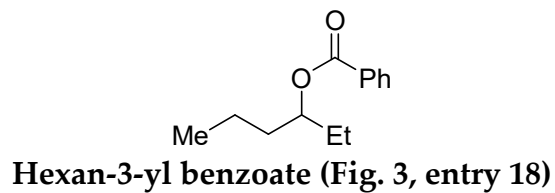

Determination of the ee:

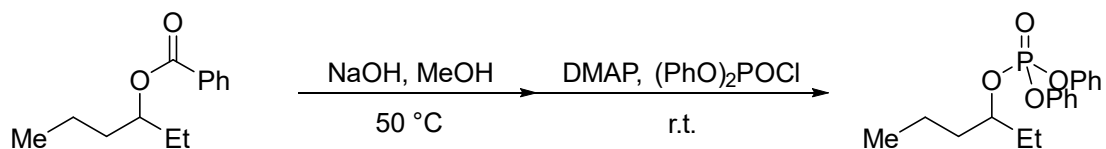

HPLC Analysis: CHIRALPAK AD column (10% *i*-PrOH in hexane, 1.0 mL/min).  
89% ee from (*S,S*)-L\*

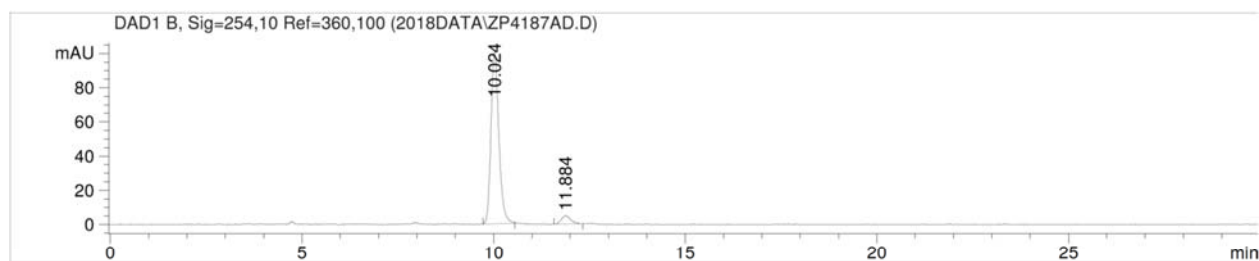

| Peak # | RetTime [min] | Type | Width [min] | Area [mAU*s] | Height [mAU] | Area %  |
|--------|---------------|------|-------------|--------------|--------------|---------|
| 1      | 10.024        | BB   | 0.2189      | 1442.60083   | 100.86459    | 94.4991 |
| 2      | 11.884        | BP   | 0.2375      | 83.97512     | 4.96164      | 5.5009  |

87% ee from (*R,R*)-L\*

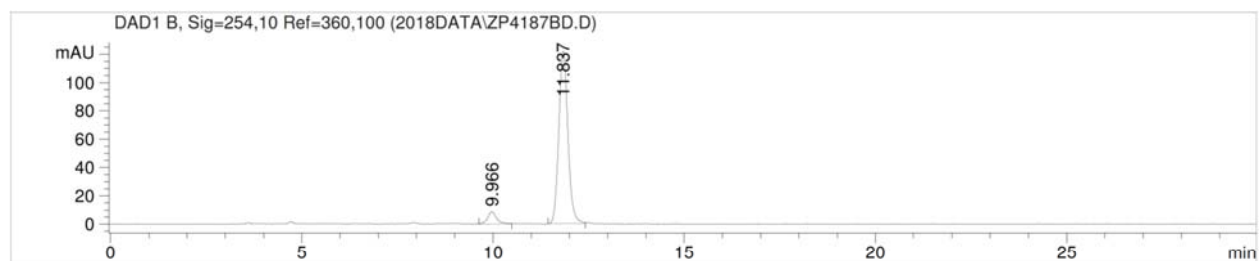

| Peak # | RetTime [min] | Type | Width [min] | Area [mAU*s] | Height [mAU] | Area %  |
|--------|---------------|------|-------------|--------------|--------------|---------|
| 1      | 9.966         | BB   | 0.2282      | 138.31622    | 8.66784      | 6.4281  |
| 2      | 11.837        | BB   | 0.2546      | 2013.43555   | 121.95586    | 93.5719 |

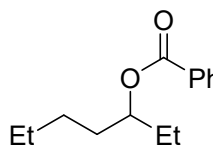  
**Heptan-3-yl benzoate (Fig. 3, entry 19)**

Determination of the ee:

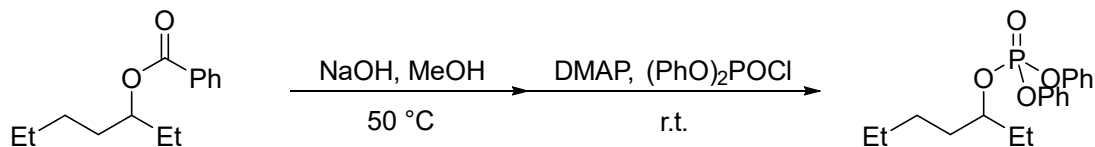

HPLC Analysis: CHIRALPAK AD column (10% *i*-PrOH in hexane, 1.0 mL/min).  
91% ee from (*S,S*)-L\*

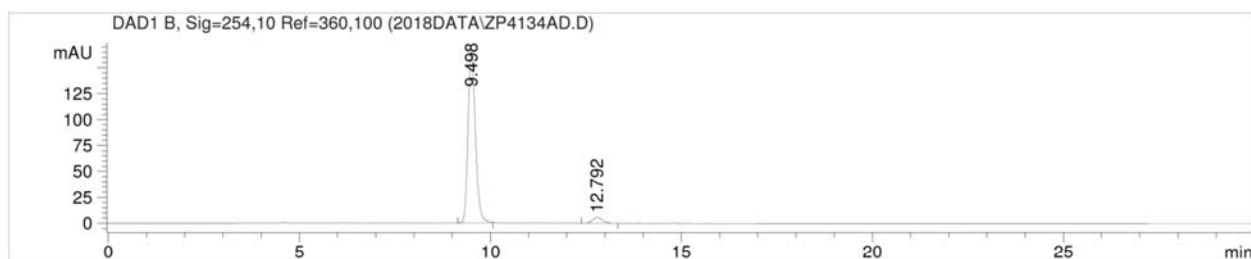

| Peak # | RetTime [min] | Type | Width [min] | Area [mAU*s] | Height [mAU] | Area %  |
|--------|---------------|------|-------------|--------------|--------------|---------|
| 1      | 9.498         | VB   | 0.2068      | 2226.49365   | 165.66118    | 95.3451 |
| 2      | 12.792        | PB   | 0.2875      | 108.70207    | 5.77895      | 4.6549  |

90% ee from (*R,R*)-L\*

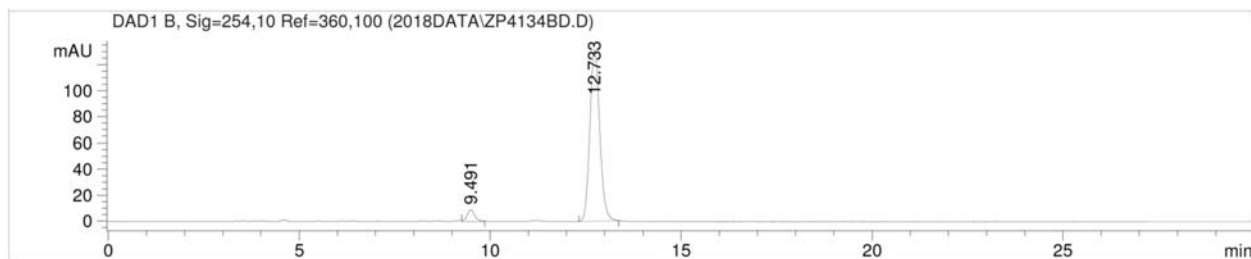

| Peak # | RetTime [min] | Type | Width [min] | Area [mAU*s] | Height [mAU] | Area %  |
|--------|---------------|------|-------------|--------------|--------------|---------|
| 1      | 9.491         | BB   | 0.2132      | 120.99550    | 8.86511      | 4.8546  |
| 2      | 12.733        | BB   | 0.2778      | 2371.40942   | 131.85941    | 95.1454 |

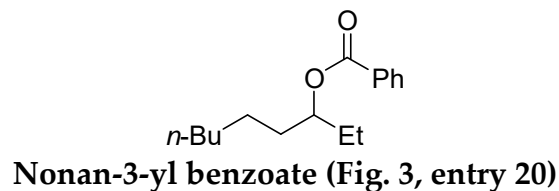

Determination of the ee:

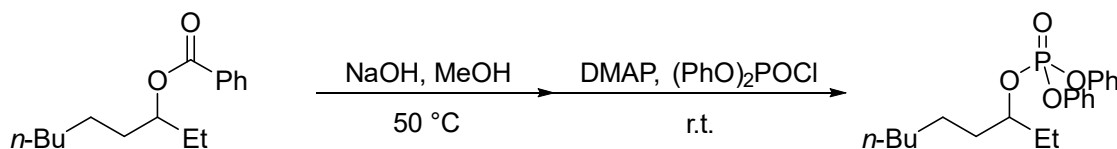

HPLC Analysis: AD column (10% *i*-PrOH in hexane, 1.0 mL/min).

89% ee from (*S,S*)-L\*

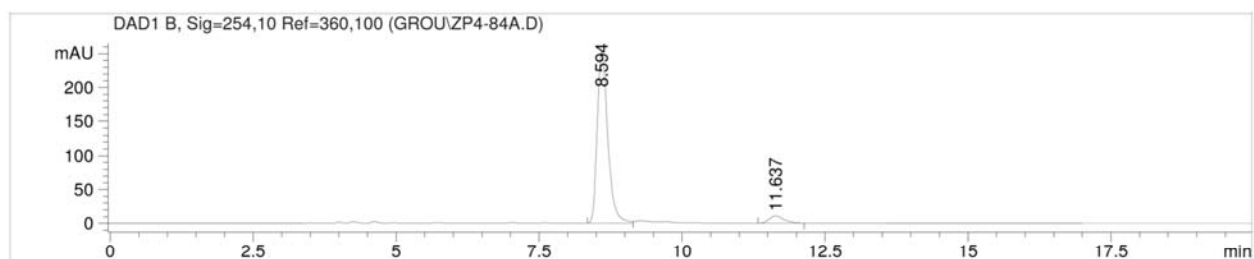

| Peak # | RetTime [min] | Type | Width [min] | Area [mAU*s] | Height [mAU] | Area %  |
|--------|---------------|------|-------------|--------------|--------------|---------|
| 1      | 8.594         | BB   | 0.1971      | 3276.86841   | 252.98671    | 94.2874 |
| 2      | 11.637        | BB   | 0.2709      | 198.53766    | 10.87741     | 5.7126  |

89% ee from (*R,R*)-L\*

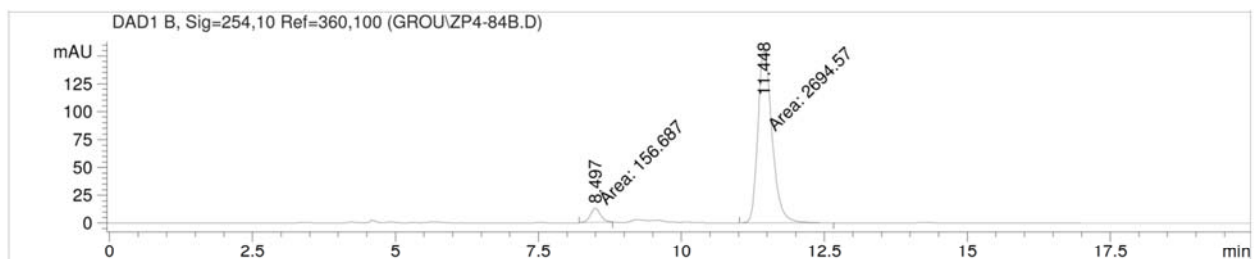

| Peak # | RetTime [min] | Type | Width [min] | Area [mAU*s] | Height [mAU] | Area %  |
|--------|---------------|------|-------------|--------------|--------------|---------|
| 1      | 8.497         | MM   | 0.2064      | 156.68736    | 12.65131     | 5.4954  |
| 2      | 11.448        | MM   | 0.2893      | 2694.56665   | 155.21452    | 94.5046 |

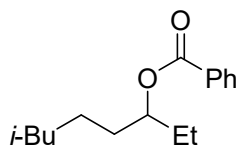

**7-Methyloctan-3-yl benzoate (Fig. 3, entry 21)**

Determination of the ee:

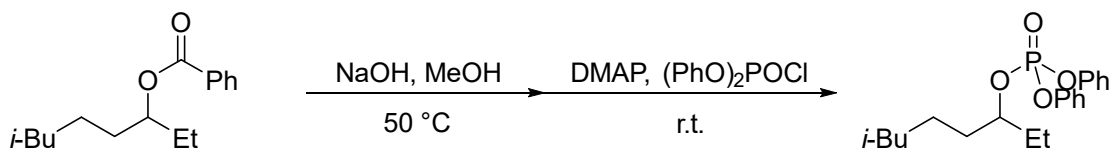

HPLC Analysis: CHIRALPAK AD column (10% *i*-PrOH in hexane, 1.0 mL/min).

90% ee from (*S,S*)-L\*

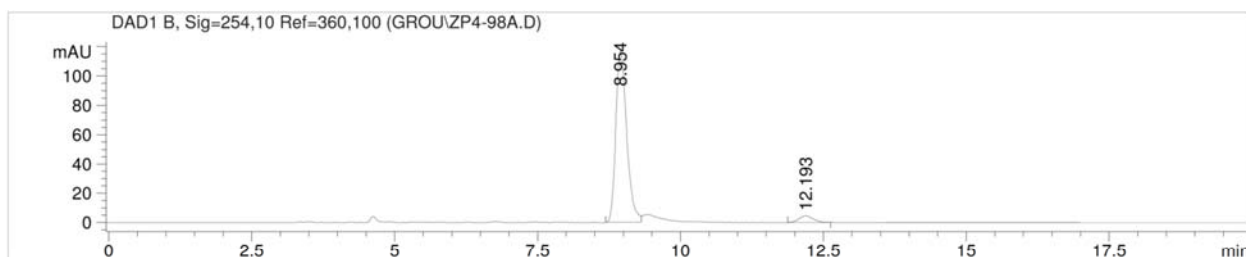

| Peak # | RetTime [min] | Type | Width [min] | Area [mAU*s] | Height [mAU] | Area %  |
|--------|---------------|------|-------------|--------------|--------------|---------|
| 1      | 8.954         | BV   | 0.2027      | 1554.69495   | 117.23003    | 95.2105 |
| 2      | 12.193        | BB   | 0.2375      | 78.20767     | 4.57466      | 4.7895  |

91% ee from (*R,R*)-L\*

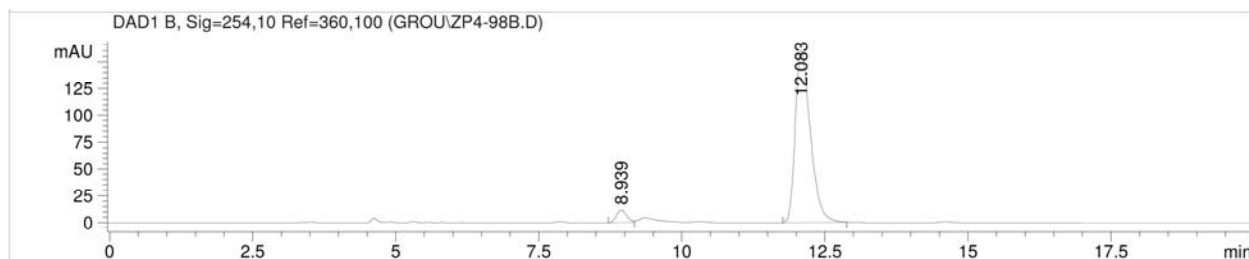

| Peak # | RetTime [min] | Type | Width [min] | Area [mAU*s] | Height [mAU] | Area %  |
|--------|---------------|------|-------------|--------------|--------------|---------|
| 1      | 8.939         | BV   | 0.1925      | 145.98038    | 11.62845     | 4.7152  |
| 2      | 12.083        | BB   | 0.2805      | 2949.96094   | 160.47281    | 95.2848 |

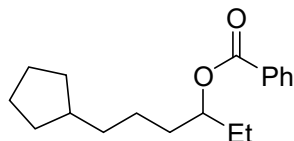

**6-Cyclopentylhexan-3-yl benzoate (Fig. 3, entry 22)**

HPLC Analysis: CHIRALPAK IC column (0.5% *i*-PrOH in hexane, 0.5 mL/min).

Compound **22**: 88% ee from (*S,S*)-L\*

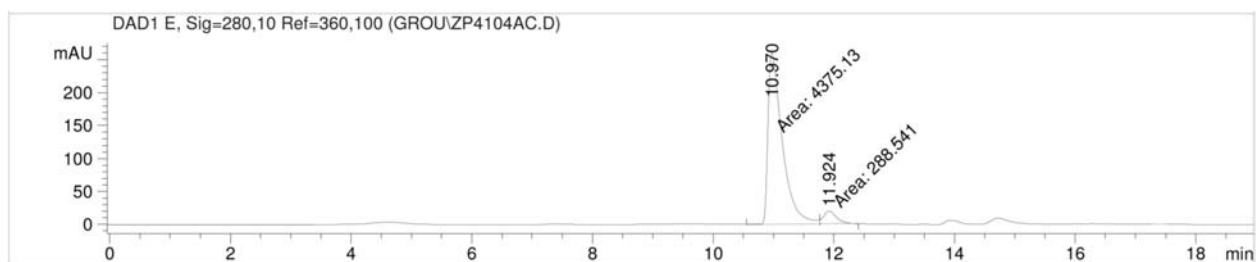

| Peak # | RetTime [min] | Type | Width [min] | Area [mAU*s] | Height [mAU] | Area %  |
|--------|---------------|------|-------------|--------------|--------------|---------|
| 1      | 10.970        | MF   | 0.2778      | 4375.12793   | 262.50116    | 93.8130 |
| 2      | 11.924        | FM   | 0.2441      | 288.54120    | 19.70183     | 6.1870  |

Compound **22**: 89% ee from (*R,R*)-L\*

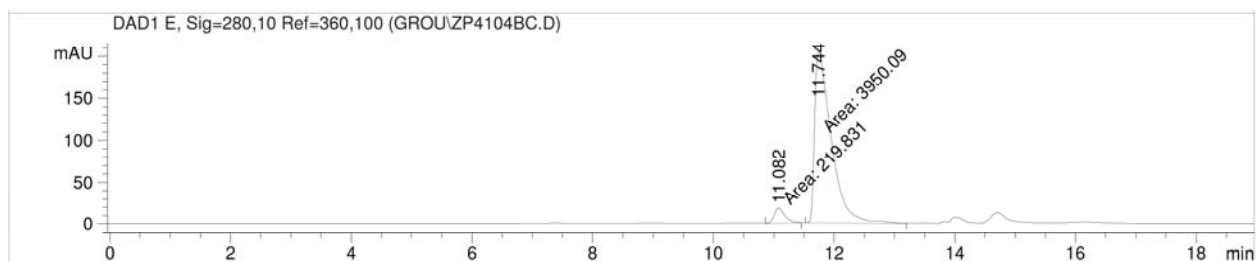

| Peak # | RetTime [min] | Type | Width [min] | Area [mAU*s] | Height [mAU] | Area %  |
|--------|---------------|------|-------------|--------------|--------------|---------|
| 1      | 11.082        | MM   | 0.2006      | 219.83051    | 18.26783     | 5.2718  |
| 2      | 11.744        | MM   | 0.3219      | 3950.09253   | 204.48874    | 94.7282 |

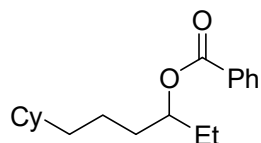

**6-Cyclohexylhexan-3-yl benzoate (Fig. 3, entry 23)**

Determination of the ee:

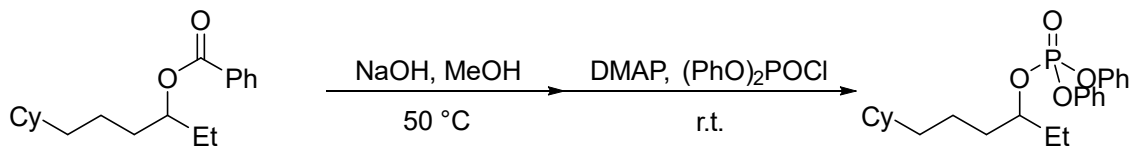

HPLC Analysis: CHIRALPAK AD column (10% *i*-PrOH in hexane, 1.0 mL/min).

90% ee from (*S,S*)-L\*

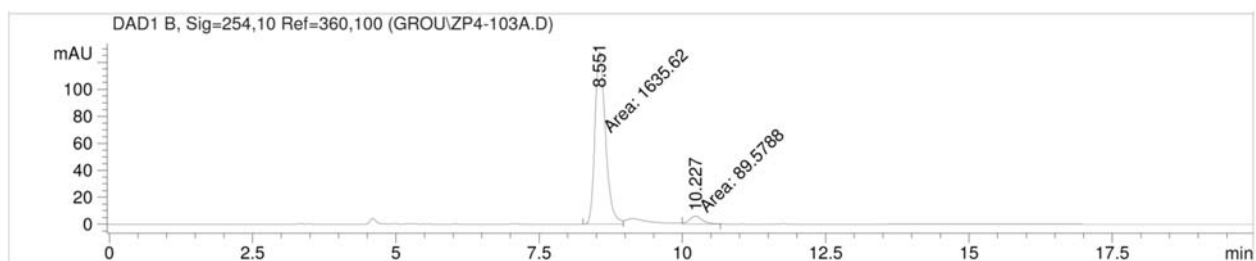

| Peak # | RetTime [min] | Type | Width [min] | Area [mAU*s] | Height [mAU] | Area %  |
|--------|---------------|------|-------------|--------------|--------------|---------|
| 1      | 8.551         | MM   | 0.2137      | 1635.61731   | 127.57049    | 94.8076 |
| 2      | 10.227        | MM   | 0.2564      | 89.57881     | 5.82234      | 5.1924  |

90% ee from (*R,R*)-L\*

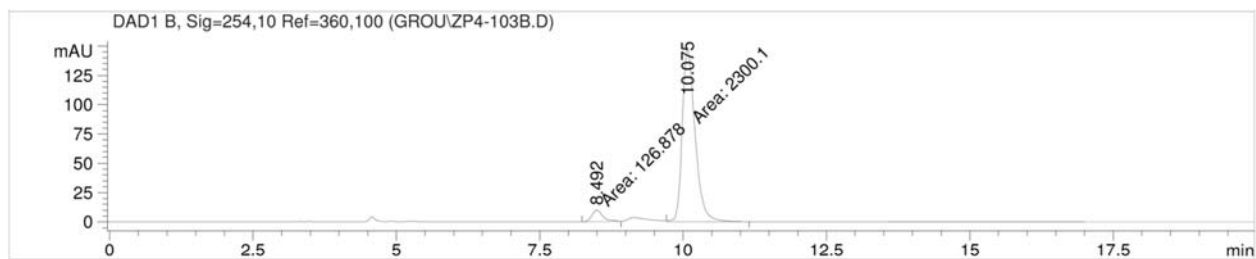

| Peak # | RetTime [min] | Type | Width [min] | Area [mAU*s] | Height [mAU] | Area %  |
|--------|---------------|------|-------------|--------------|--------------|---------|
| 1      | 8.492         | MM   | 0.2165      | 126.87782    | 9.76714      | 5.2278  |
| 2      | 10.075        | MM   | 0.2609      | 2300.09668   | 146.90935    | 94.7722 |

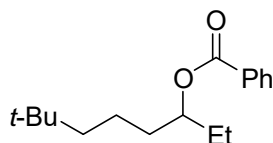

**7,7-Dimethyloctan-3-yl benzoate (Fig. 3, entry 24)**

HPLC Analysis: CHIRALPAK AD column (0.5% *i*-PrOH in hexane, 0.5 mL/min).

Compound **24**: 88% ee from (*S,S*)-L\*

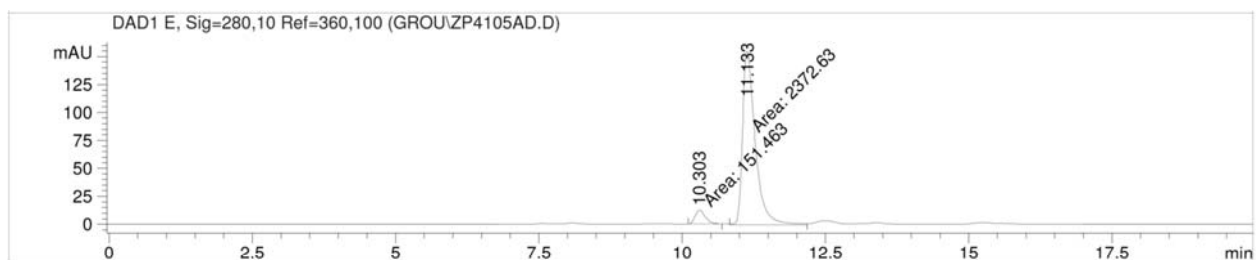

| Peak # | RetTime [min] | Type | Width [min] | Area [mAU*s] | Height [mAU] | Area %  |
|--------|---------------|------|-------------|--------------|--------------|---------|
| 1      | 10.303        | MM   | 0.2050      | 151.46315    | 12.31636     | 6.0007  |
| 2      | 11.133        | MM   | 0.2550      | 2372.63062   | 155.06656    | 93.9993 |

Compound **24**: 89% ee from (*R,R*)-L\*

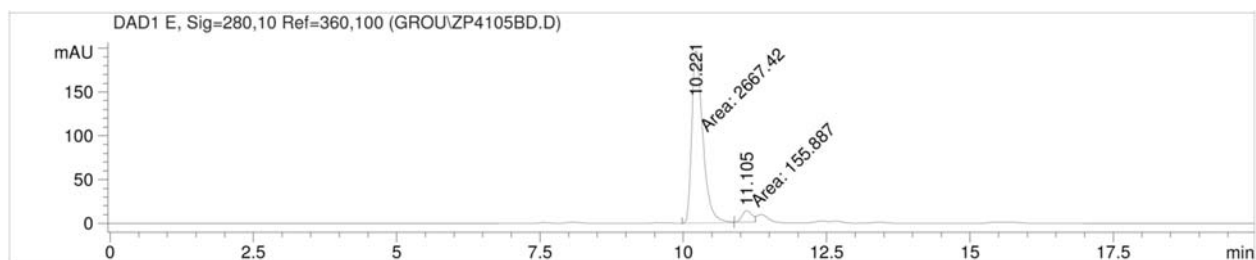

| Peak # | RetTime [min] | Type | Width [min] | Area [mAU*s] | Height [mAU] | Area %  |
|--------|---------------|------|-------------|--------------|--------------|---------|
| 1      | 10.221        | MM   | 0.2258      | 2667.42017   | 196.91032    | 94.4786 |
| 2      | 11.105        | MM   | 0.2013      | 155.88695    | 12.90547     | 5.5214  |



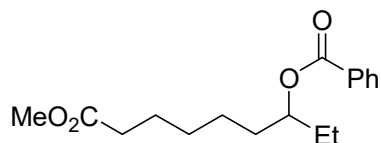

**9-Methoxy-9-oxononan-3-yl benzoate (Fig. 3, entry 25)**

HPLC Analysis: CHIRALPAK AD column (1% *i*-PrOH in hexane, 1.0 mL/min).

Compound **25**: 86% ee from (*S,S*)-L\*

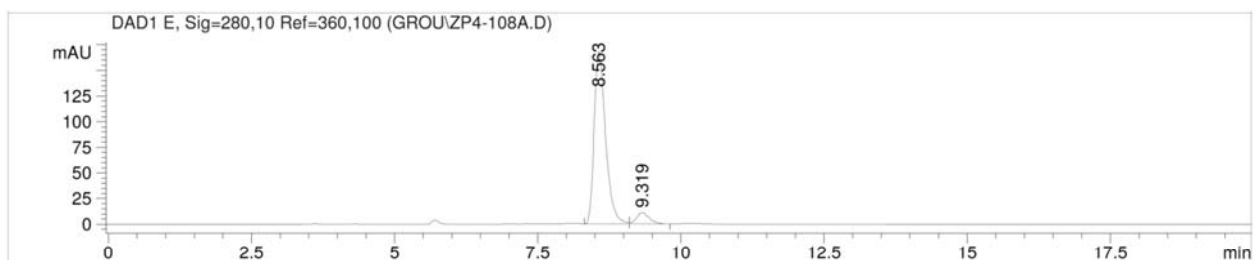

| Peak # | RetTime [min] | Type | Width [min] | Area [mAU*s] | Height [mAU] | Area %  |
|--------|---------------|------|-------------|--------------|--------------|---------|
| 1      | 8.563         | PV   | 0.2100      | 2336.60303   | 168.24300    | 93.1247 |
| 2      | 9.319         | VP   | 0.2347      | 172.51022    | 11.01679     | 6.8753  |

Compound **25**: 88% ee from (*R,R*)-L\*

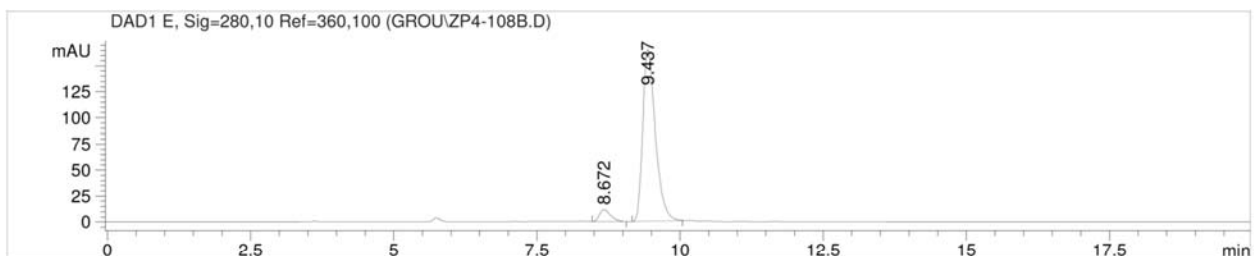

| Peak # | RetTime [min] | Type | Width [min] | Area [mAU*s] | Height [mAU] | Area %  |
|--------|---------------|------|-------------|--------------|--------------|---------|
| 1      | 8.672         | PP   | 0.2074      | 156.98535    | 11.63401     | 5.8282  |
| 2      | 9.437         | PB   | 0.2332      | 2536.56519   | 165.13065    | 94.1718 |



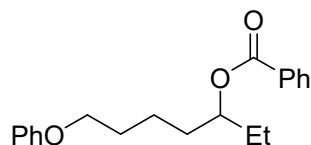

**7-Phenoxyheptan-3-yl benzoate (Fig. 3, entry 26)**

HPLC Analysis: CHIRALPAK AD column (1% *i*-PrOH in hexane, 0.5 mL/min).

Compound **26**: 89% ee from (*S,S*)-L\*

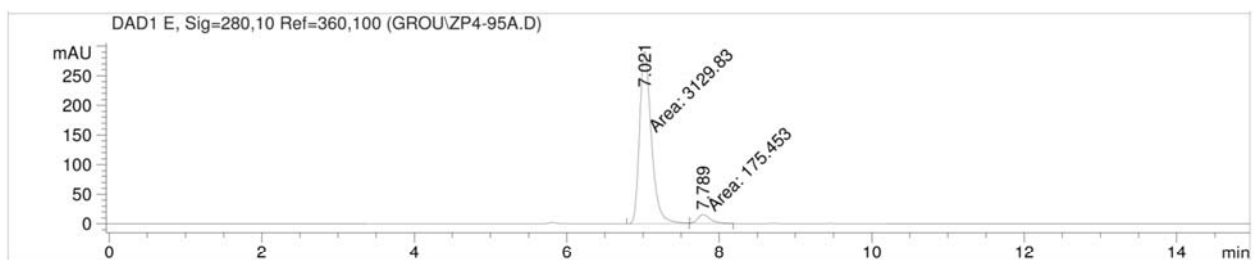

| Peak # | RetTime [min] | Type | Width [min] | Area [mAU*s] | Height [mAU] | Area %  |
|--------|---------------|------|-------------|--------------|--------------|---------|
| 1      | 7.021         | MM   | 0.1793      | 3129.83350   | 291.00714    | 94.6917 |
| 2      | 7.789         | MM   | 0.1963      | 175.45293    | 14.89868     | 5.3083  |

Compound **26**: 90% ee from (*R,R*)-L\*

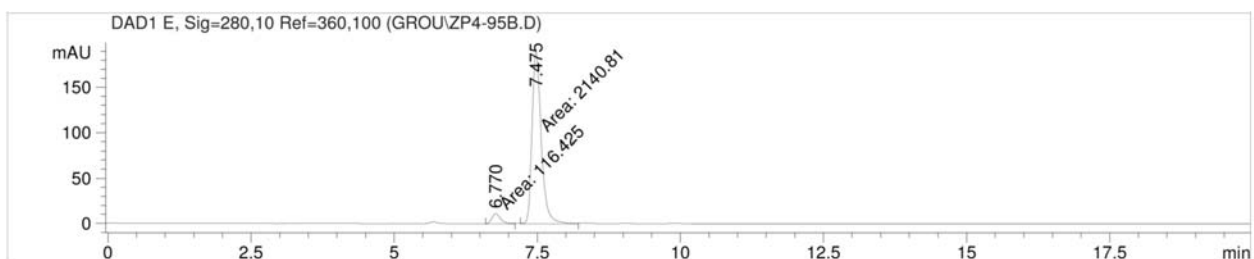

| Peak # | RetTime [min] | Type | Width [min] | Area [mAU*s] | Height [mAU] | Area %  |
|--------|---------------|------|-------------|--------------|--------------|---------|
| 1      | 6.770         | MM   | 0.1702      | 116.42479    | 11.40308     | 5.1578  |
| 2      | 7.475         | MM   | 0.1872      | 2140.81152   | 190.56514    | 94.8422 |

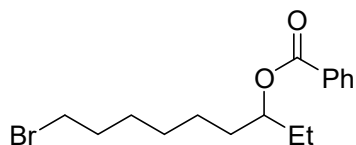

**9-Bromononan-3-yl benzoate (Fig. 3, entry 27)**

HPLC Analysis: CHIRALPAK AD column (0.5% *i*-PrOH in hexane, 1.0 mL/min).

Compound **27**: 92% ee from (*S,S*)-L\*

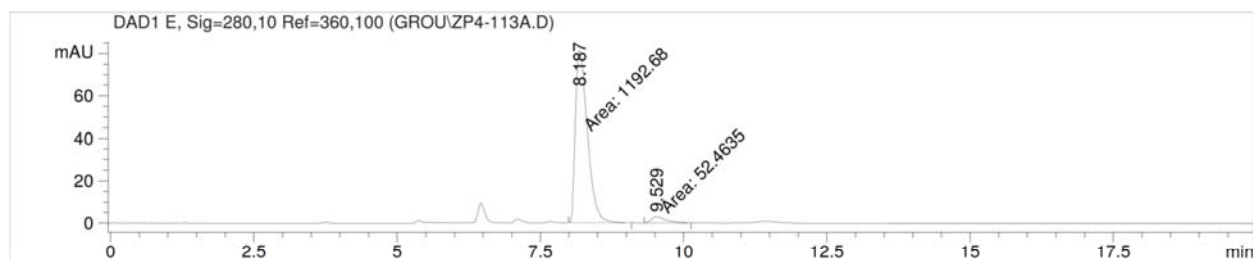

| Peak # | RetTime [min] | Type | Width [min] | Area [mAU*s] | Height [mAU] | Area %  |
|--------|---------------|------|-------------|--------------|--------------|---------|
| 1      | 8.187         | MM   | 0.2446      | 1192.67957   | 81.28077     | 95.7865 |
| 2      | 9.529         | MM   | 0.3024      | 52.46350     | 2.89177      | 4.2135  |

Compound **27**: 90% ee from (*R,R*)-L\*

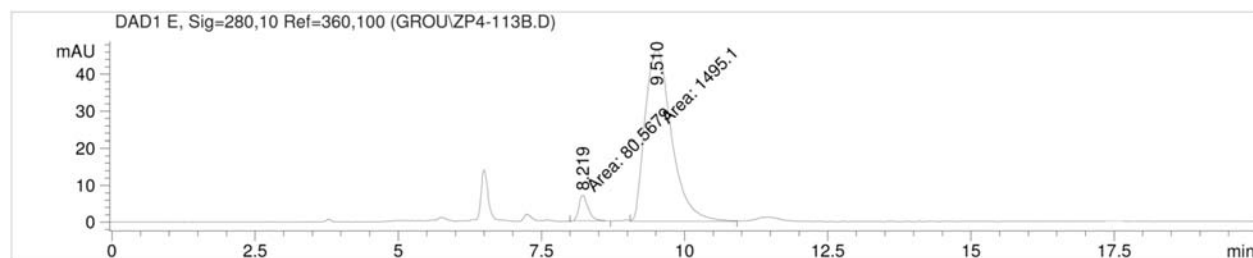

| Peak # | RetTime [min] | Type | Width [min] | Area [mAU*s] | Height [mAU] | Area %  |
|--------|---------------|------|-------------|--------------|--------------|---------|
| 1      | 8.219         | MM   | 0.1898      | 80.56791     | 7.07340      | 5.1132  |
| 2      | 9.510         | MM   | 0.5371      | 1495.10229   | 46.39724     | 94.8868 |

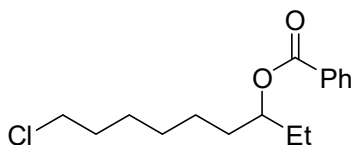

**9-Chlorononan-3-yl benzoate (Fig. 3, entry 28)**

HPLC Analysis: CHIRALPAK AD column (1% *i*-PrOH in hexane, 1.0 mL/min).

Compound **28**: 88% ee from (*S,S*)-L\*

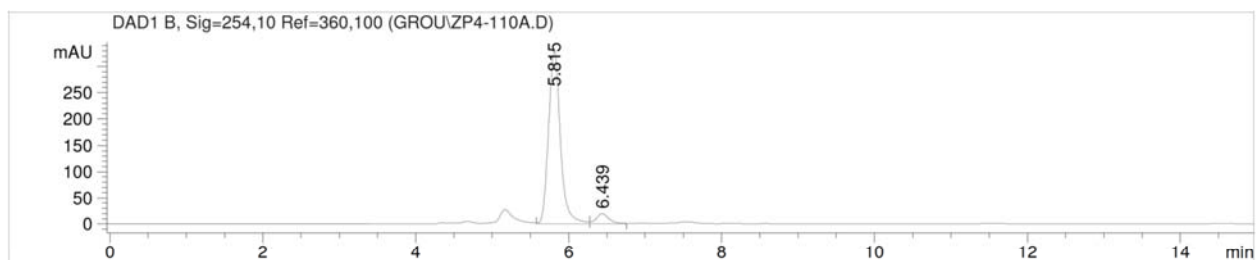

| Peak # | RetTime [min] | Type | Width [min] | Area [mAU*s] | Height [mAU] | Area %  |
|--------|---------------|------|-------------|--------------|--------------|---------|
| 1      | 5.815         | VV   | 0.1657      | 3555.25928   | 329.89691    | 94.0994 |
| 2      | 6.439         | VB   | 0.1707      | 222.93671    | 19.30690     | 5.9006  |

Compound **28**: 87% ee from (*R,R*)-L\*

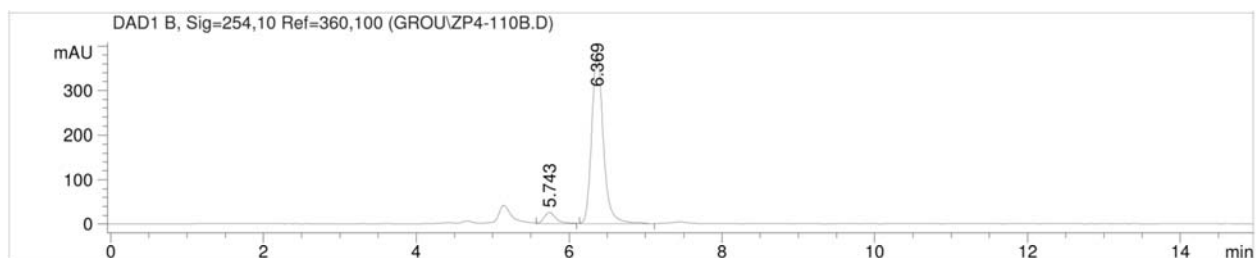

| Peak # | RetTime [min] | Type | Width [min] | Area [mAU*s] | Height [mAU] | Area %  |
|--------|---------------|------|-------------|--------------|--------------|---------|
| 1      | 5.743         | VB   | 0.1715      | 288.49451    | 25.59303     | 6.5798  |
| 2      | 6.369         | BB   | 0.1611      | 4096.03564   | 388.16141    | 93.4202 |

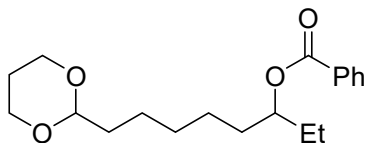

**8-(1,3-Dioxan-2-yl)octan-3-yl benzoate (Fig. 3, entry 29)**

HPLC Analysis: CHIRALPAK AD column (1% *i*-PrOH in hexane, 1.0 mL/min).

Compound **29**: 89% ee from (*S,S*)-**L**\*

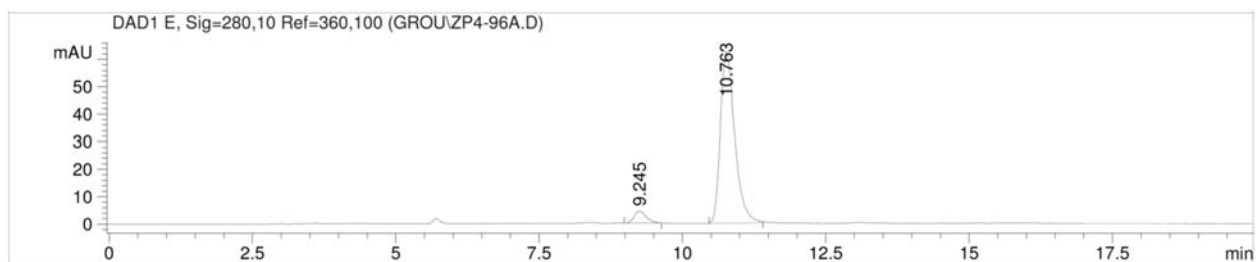

| Peak # | RetTime [min] | Type | Width [min] | Area [mAU*s] | Height [mAU] | Area %  |
|--------|---------------|------|-------------|--------------|--------------|---------|
| 1      | 9.245         | PB   | 0.2201      | 65.66151     | 4.40012      | 5.7182  |
| 2      | 10.763        | BB   | 0.2615      | 1082.62769   | 62.68779     | 94.2818 |

Compound **29**: 88% ee from (*R,R*)-**L**\*

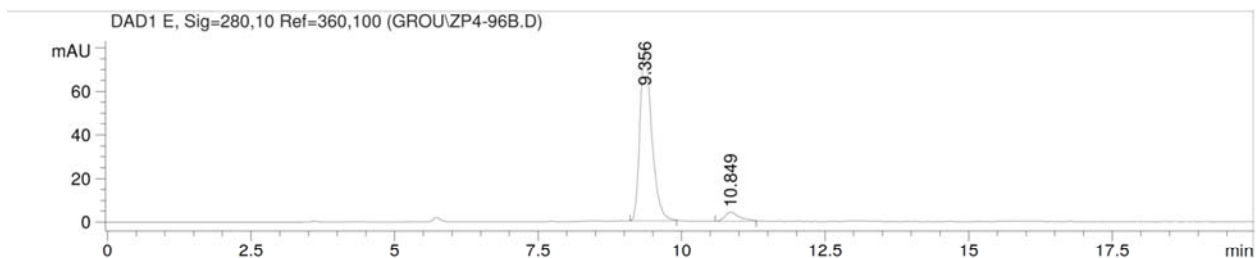

| Peak # | RetTime [min] | Type | Width [min] | Area [mAU*s] | Height [mAU] | Area %  |
|--------|---------------|------|-------------|--------------|--------------|---------|
| 1      | 9.356         | BB   | 0.2196      | 1129.05652   | 78.59576     | 93.7953 |
| 2      | 10.849        | BB   | 0.2581      | 74.68848     | 4.18773      | 6.2047  |

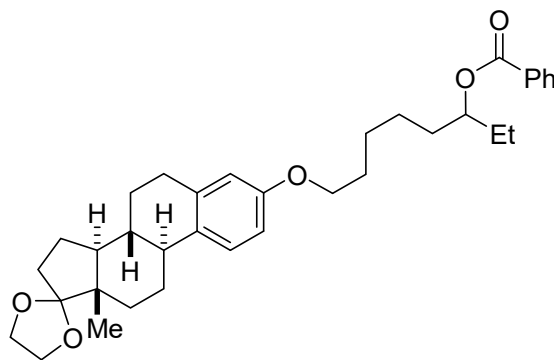

**8-(((8R,9S,13S,14S)-13-methyl-6,7,8,9,11,12,13,14,15,16-decahydrospiro[cyclopenta[a]phenanthrene-17,2'-[1,3]dioxolan]-3-yl)oxy)octan-3-yl benzoate (Fig. 3, entries 30 and 31)**

HPLC Analysis: CHIRALPAK IC column (5% *i*-PrOH in hexane, 1.0 mL/min).

Compound 30: 95:5 d.r. from (*S,S*)-L\*

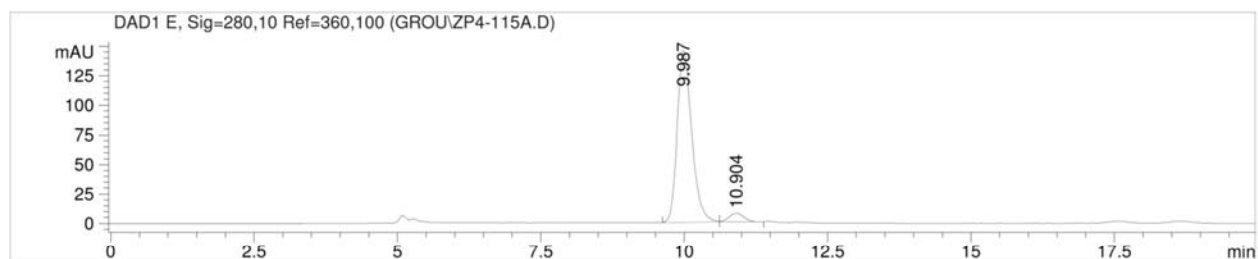

| Peak # | RetTime [min] | Type | Width [min] | Area [mAU*s] | Height [mAU] | Area %  |
|--------|---------------|------|-------------|--------------|--------------|---------|
| 1      | 9.987         | BB   | 0.2684      | 2571.91699   | 145.37537    | 95.1336 |
| 2      | 10.904        | BP   | 0.2751      | 131.56252    | 7.48276      | 4.8664  |

Compound 31: 7:93 d.r. from (*R,R*)-L\*

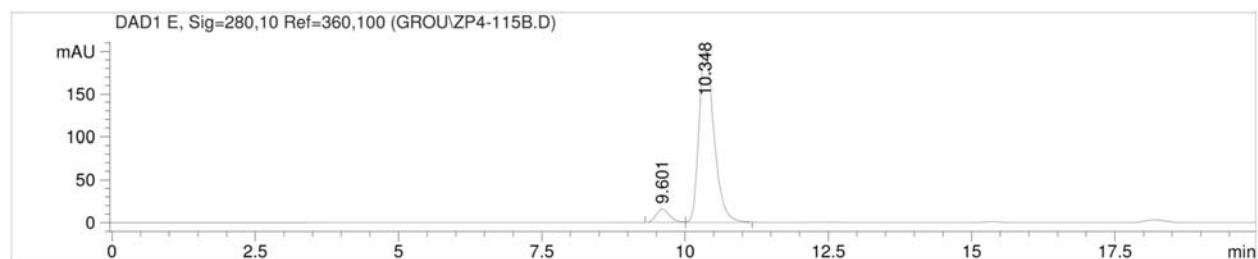

| Peak # | RetTime [min] | Type | Width [min] | Area [mAU*s] | Height [mAU] | Area %  |
|--------|---------------|------|-------------|--------------|--------------|---------|
| 1      | 9.601         | PV   | 0.2463      | 257.10187    | 15.76334     | 6.5533  |
| 2      | 10.348        | VB   | 0.2793      | 3666.16821   | 200.56812    | 93.4467 |

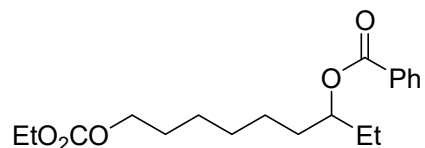

**9-((Ethoxycarbonyl)oxy)nonan-3-yl benzoate (Fig. 3, entry 32)**

HPLC Analysis: CHIRALPAK AD column (1% *i*-PrOH in hexane, 1.0 mL/min).

Compound **32**: 91% ee from (*S,S*)-L\*

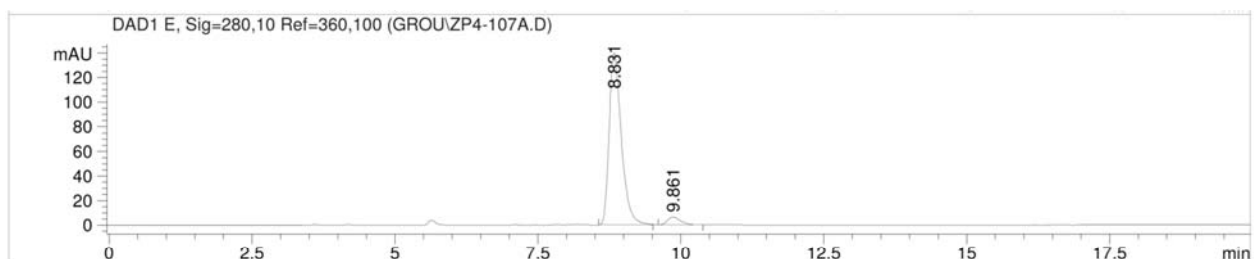

| Peak # | RetTime [min] | Type | Width [min] | Area [mAU*s] | Height [mAU] | Area %  |
|--------|---------------|------|-------------|--------------|--------------|---------|
| 1      | 8.831         | BB   | 0.2274      | 2080.28174   | 139.94989    | 95.2659 |
| 2      | 9.861         | BP   | 0.2390      | 103.37729    | 6.38221      | 4.7341  |

Compound **32**: 91% ee from (*R,R*)-L\*

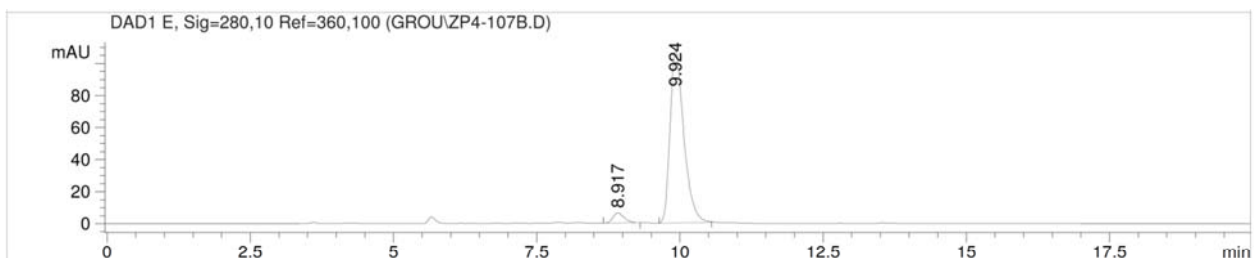

| Peak # | RetTime [min] | Type | Width [min] | Area [mAU*s] | Height [mAU] | Area %  |
|--------|---------------|------|-------------|--------------|--------------|---------|
| 1      | 8.917         | PB   | 0.2169      | 88.72775     | 6.35503      | 4.6915  |
| 2      | 9.924         | BB   | 0.2556      | 1802.50647   | 107.52171    | 95.3085 |

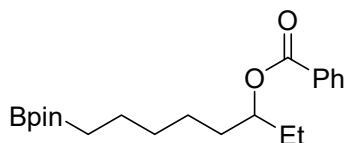

**8-(4,4,5,5-Tetramethyl-1,3,2-dioxaborolan-2-yl)octan-3-yl benzoate (Fig. 3, entry 33)**

HPLC Analysis: CHIRALPAK IC column (5% *i*-PrOH in hexane, 1.0 mL/min).

Compound **33**: 88% ee from (*S,S*)-L\*

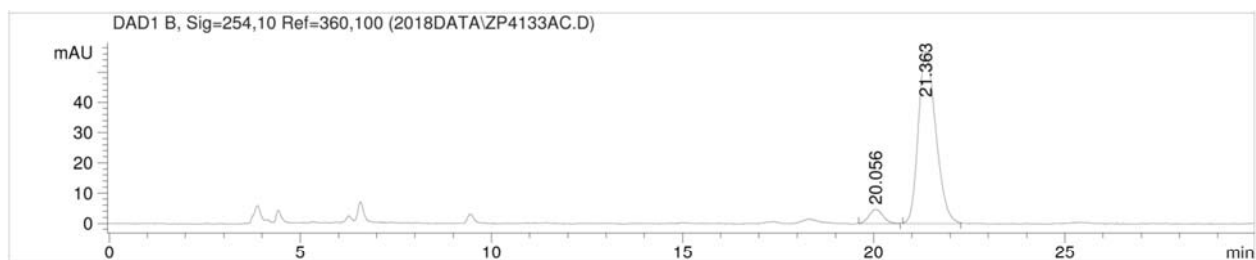

| Peak # | RetTime [min] | Type | Width [min] | Area [mAU*s] | Height [mAU] | Area %  |
|--------|---------------|------|-------------|--------------|--------------|---------|
| 1      | 20.056        | BB   | 0.3109      | 118.02908    | 4.63819      | 6.1224  |
| 2      | 21.363        | BB   | 0.4849      | 1809.80981   | 56.92802     | 93.8776 |

Compound **33**: 89% ee from (*R,R*)-L\*

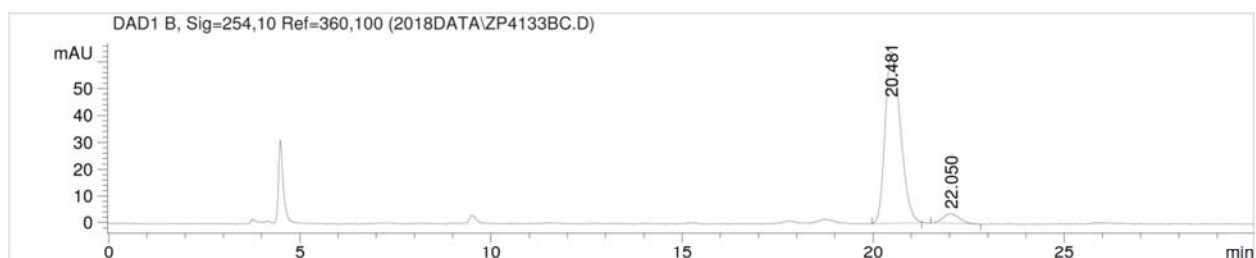

| Peak # | RetTime [min] | Type | Width [min] | Area [mAU*s] | Height [mAU] | Area %  |
|--------|---------------|------|-------------|--------------|--------------|---------|
| 1      | 20.481        | BB   | 0.4275      | 1801.49390   | 64.17296     | 94.3402 |
| 2      | 22.050        | BP   | 0.3637      | 108.07824    | 3.60613      | 5.6598  |



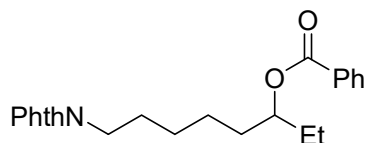

**8-(1,3-Dioxisoindolin-2-yl)octan-3-yl benzoate (Fig. 3, entry 34)**

HPLC Analysis: CHIRALPAK IC column (10% *i*-PrOH in hexane, 1.0 mL/min).

Compound **34**: 89% ee from (*S,S*)-L\*

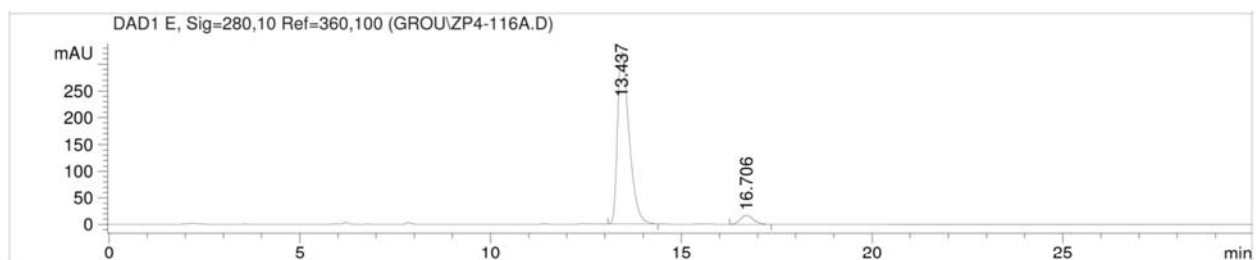

| Peak # | RetTime [min] | Type | Width [min] | Area [mAU*s] | Height [mAU] | Area %  |
|--------|---------------|------|-------------|--------------|--------------|---------|
| 1      | 13.437        | PB   | 0.3202      | 6822.78857   | 323.24841    | 94.3356 |
| 2      | 16.706        | BB   | 0.3714      | 409.67432    | 16.98187     | 5.6644  |

Compound **34**: 89% ee from (*R,R*)-L\*

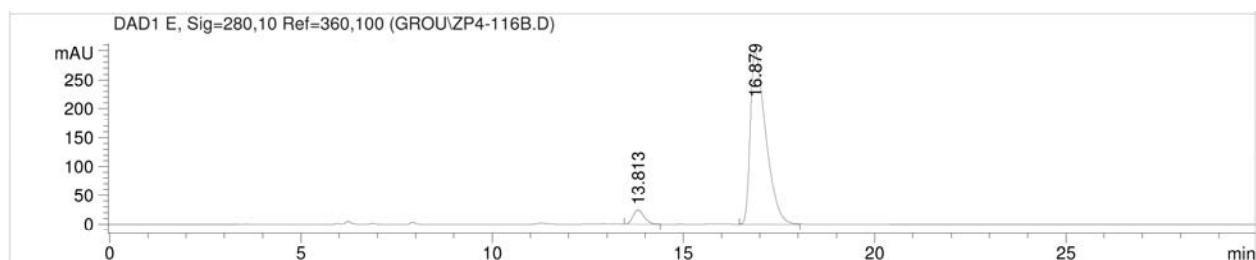

| Peak # | RetTime [min] | Type | Width [min] | Area [mAU*s] | Height [mAU] | Area %  |
|--------|---------------|------|-------------|--------------|--------------|---------|
| 1      | 13.813        | BB   | 0.3149      | 489.03201    | 24.28673     | 5.5302  |
| 2      | 16.879        | BB   | 0.4155      | 8353.94922   | 297.56677    | 94.4698 |



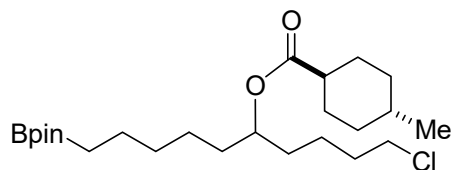

**1-Chloro-10-(4,4,5,5-tetramethyl-1,3,2-dioxaborolan-2-yl)decan-5-yl (1r,4r)-4-methylcyclohexane-1-carboxylate (Fig. 4, entry 38)**

Determination of the ee:

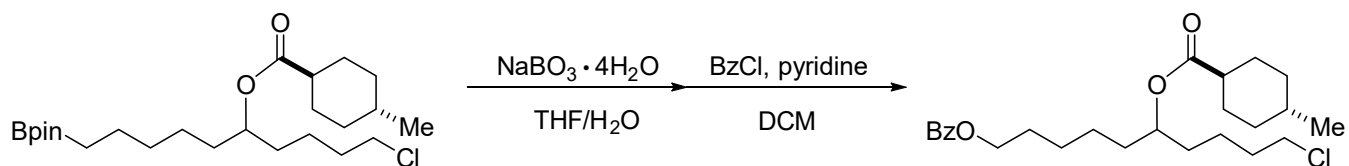

HPLC Analysis: CHIRALCEL OD column (3% *i*-PrOH in hexane, 1.0 mL/min).

92% ee from (*S,S*)-L\*

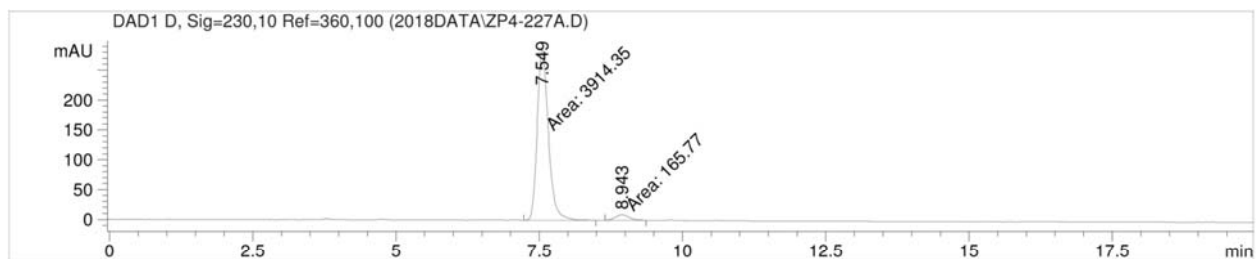

| Peak # | RetTime [min] | Type | Width [min] | Area [mAU*s] | Height [mAU] | Area %  |
|--------|---------------|------|-------------|--------------|--------------|---------|
| 1      | 7.549         | MM   | 0.2275      | 3914.35181   | 286.82129    | 95.9371 |
| 2      | 8.943         | MM   | 0.2917      | 165.77034    | 9.47287      | 4.0629  |

92% ee from (*R,R*)-L\*

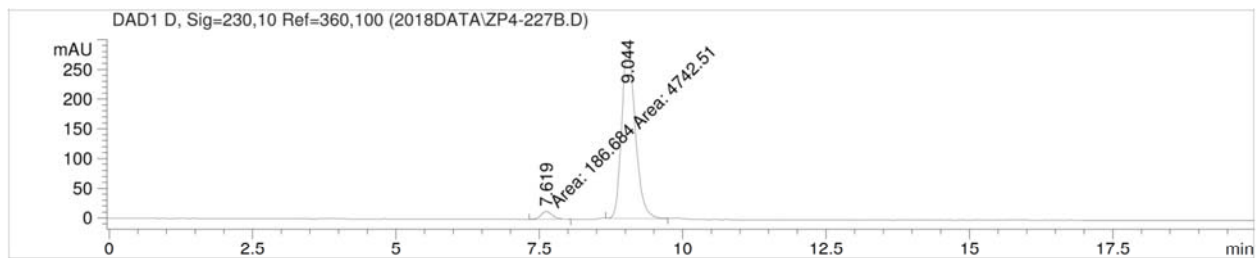

| Peak # | RetTime [min] | Type | Width [min] | Area [mAU*s] | Height [mAU] | Area %  |
|--------|---------------|------|-------------|--------------|--------------|---------|
| 1      | 7.619         | MM   | 0.2338      | 186.68445    | 13.30905     | 3.7873  |
| 2      | 9.044         | MM   | 0.2760      | 4742.50830   | 286.38174    | 96.2127 |

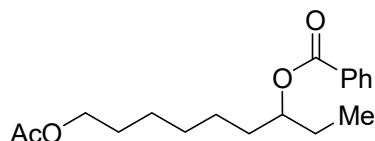

**9-Acetoxynonan-3-yl benzoate (Fig. 4, entry 39)**

HPLC Analysis: CHIRALPAK AD column (2% *i*-PrOH in hexane, 1.0 mL/min).

Compound **39**: 90% ee from (*S,S*)-**L**\*

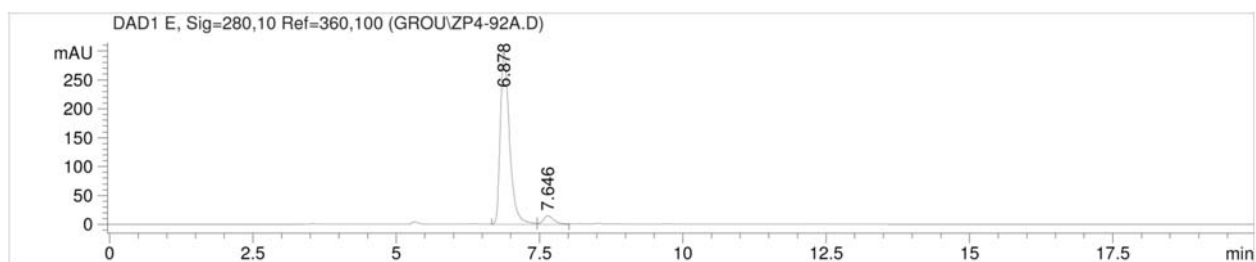

| Peak # | RetTime [min] | Type | Width [min] | Area [mAU*s] | Height [mAU] | Area %  |
|--------|---------------|------|-------------|--------------|--------------|---------|
| 1      | 6.878         | BV   | 0.1688      | 3349.00757   | 298.69806    | 94.8895 |
| 2      | 7.646         | VB   | 0.1877      | 180.36739    | 14.44119     | 5.1105  |

Compound **39**: 89% ee from (*R,R*)-**L**\*

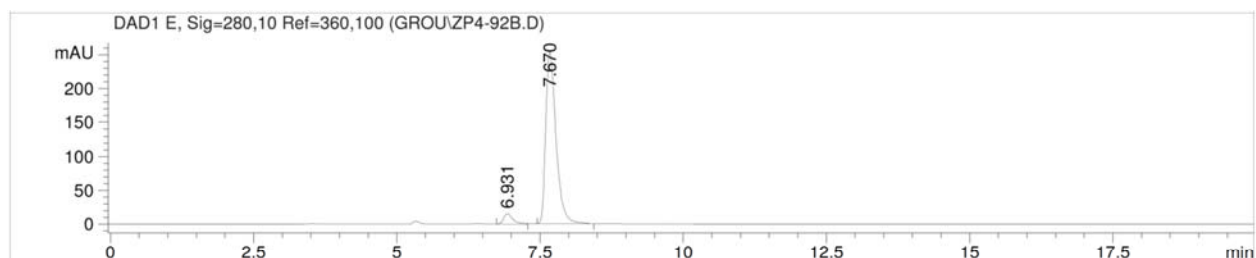

| Peak # | RetTime [min] | Type | Width [min] | Area [mAU*s] | Height [mAU] | Area %  |
|--------|---------------|------|-------------|--------------|--------------|---------|
| 1      | 6.931         | BB   | 0.1672      | 211.08757    | 19.05933     | 5.2665  |
| 2      | 7.670         | BB   | 0.1900      | 3797.05566   | 303.41019    | 94.7335 |

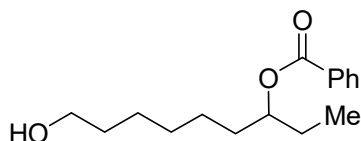

**9-Hydroxynonan-3-yl benzoate (Fig. 4, entry 40)**

HPLC Analysis: CHIRALCEL OJ column (5% *i*-PrOH in hexane, 1.0 mL/min).

Compound **40**: 90% ee from (*S,S*)-L\*

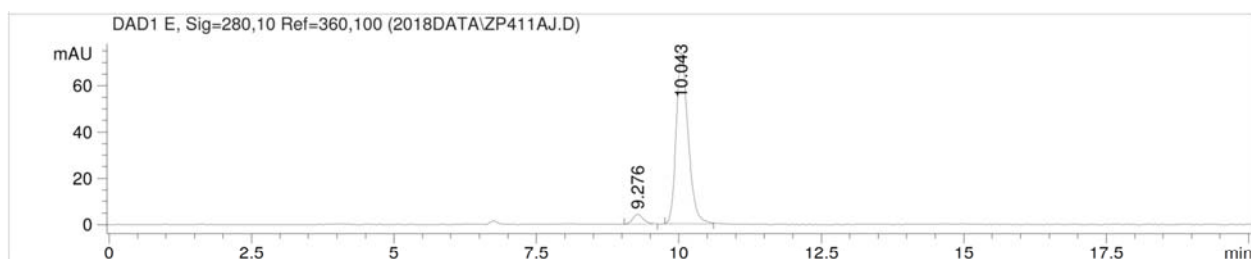

| Peak # | RetTime [min] | Type | Width [min] | Area [mAU*s] | Height [mAU] | Area %  |
|--------|---------------|------|-------------|--------------|--------------|---------|
| 1      | 9.276         | BB   | 0.1917      | 55.18505     | 4.24286      | 4.8447  |
| 2      | 10.043        | BB   | 0.2247      | 1083.89282   | 74.09279     | 95.1553 |

Compound **40**: 89% ee from (*R,R*)-L\*

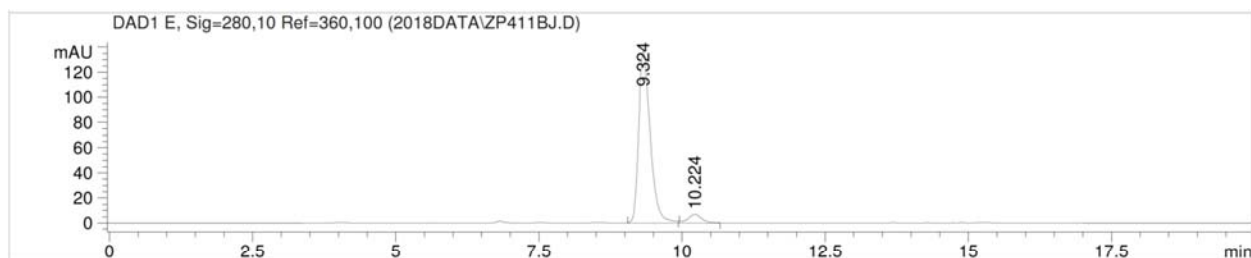

| Peak # | RetTime [min] | Type | Width [min] | Area [mAU*s] | Height [mAU] | Area %  |
|--------|---------------|------|-------------|--------------|--------------|---------|
| 1      | 9.324         | BB   | 0.2136      | 1921.59656   | 137.04965    | 94.3853 |
| 2      | 10.224        | BB   | 0.2325      | 114.31011    | 6.92779      | 5.6147  |

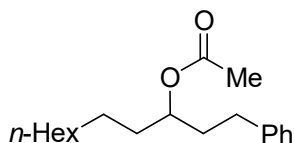

**1-Phenylundecan-3-yl acetate (Fig. 4, entry 41)**

HPLC Analysis: CHIRALPAK AD column (0.5% *i*-PrOH in hexane, 1.0 mL/min).

Compound **41**: 90% ee from (*S,S*)-L\*

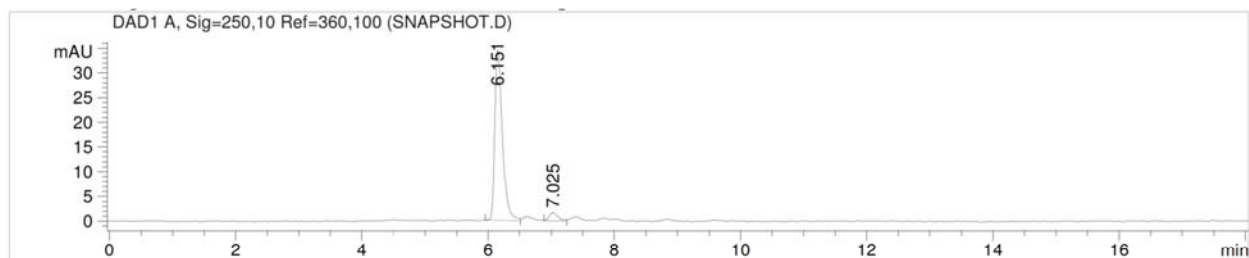

| Peak # | RetTime [min] | Type | Width [min] | Area [mAU*s] | Height [mAU] | Area %  |
|--------|---------------|------|-------------|--------------|--------------|---------|
| 1      | 6.151         | BB   | 0.1298      | 295.45636    | 34.54222     | 95.0634 |
| 2      | 7.025         | BB   | 0.1391      | 15.34283     | 1.64067      | 4.9366  |

Compound **41**: 90% ee from (*R,R*)-L\*

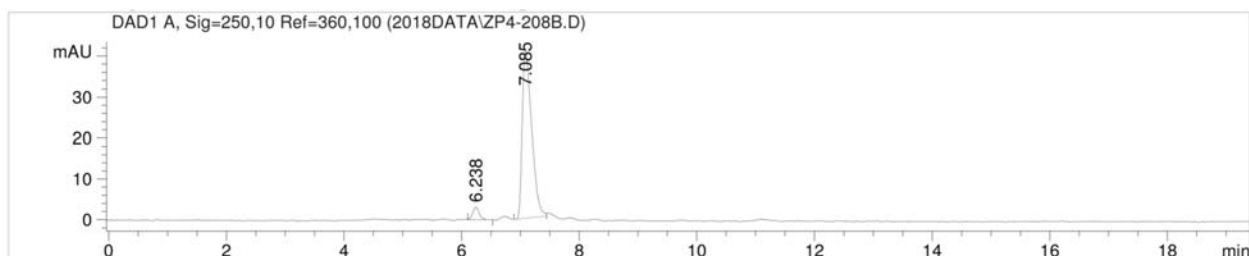

| Peak # | RetTime [min] | Type | Width [min] | Area [mAU*s] | Height [mAU] | Area %  |
|--------|---------------|------|-------------|--------------|--------------|---------|
| 1      | 6.238         | BB   | 0.1267      | 24.63585     | 3.10174      | 5.0885  |
| 2      | 7.085         | VB   | 0.1705      | 459.51434    | 41.09470     | 94.9115 |

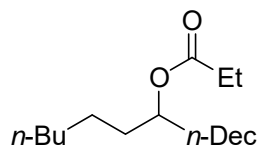

Heptadecan-7-yl propionate (Fig. 4, entry 42)

Determination of the ee:

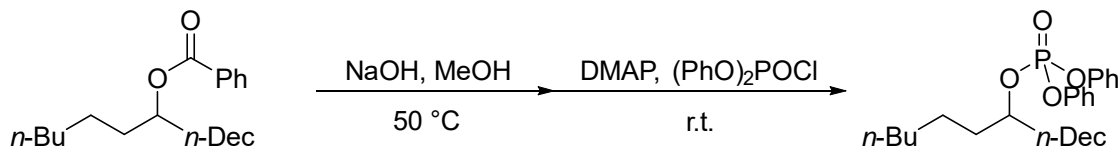

SFC Analysis: CHIRALCEL OD column (4% CH<sub>3</sub>CN in supercritical CO<sub>2</sub>, 2.5 mL/min).  
Compound **42**: 92% ee from (*S,S*)-L\*

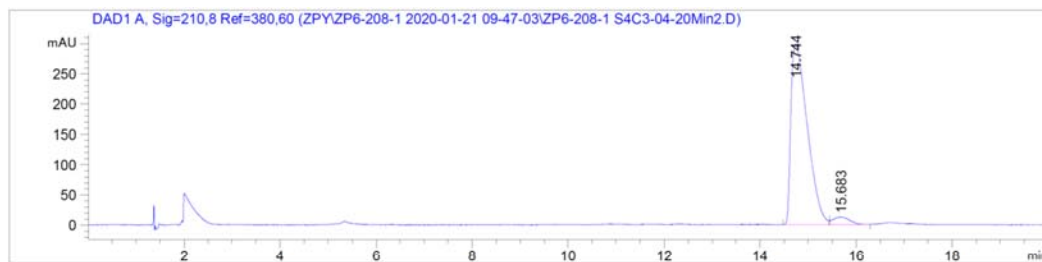

| Peak # | RetTime [min] | Type | Width [min] | Area [mAU*s] | Height [mAU] | Area %  |
|--------|---------------|------|-------------|--------------|--------------|---------|
| 1      | 14.744        | BB   | 0.3318      | 7069.66699   | 299.04630    | 95.9326 |
| 2      | 15.683        | BB   | 0.2841      | 299.74460    | 12.52983     | 4.0674  |

Compound **42**: 93% ee from (*R,R*)-L\*

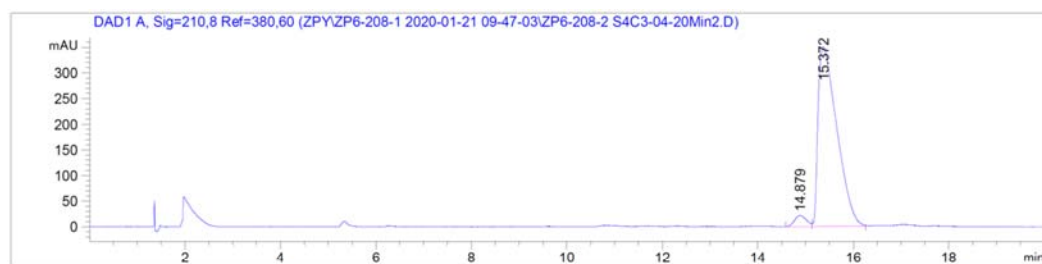

| Peak # | RetTime [min] | Type | Width [min] | Area [mAU*s] | Height [mAU] | Area %  |
|--------|---------------|------|-------------|--------------|--------------|---------|
| 1      | 14.879        | BV   | 0.2048      | 369.19495    | 21.56039     | 3.7224  |
| 2      | 15.372        | VB   | 0.3734      | 9548.92773   | 349.88361    | 96.2776 |
